# Supplementary material for: Effects of amino acids on the lignocellulose degradation by Aspergillus fumigatus Z5: insights into performance, transcriptional, and proteomic profiles
Source: Biotechnol Biofuels. 2019 Jan 4;12:4. doi: 10.1186/s13068-018-1350-2 (PMC6318881; doi:10.1186/s13068-018-1350-2)
Supplement: Supplementary file 6 — Additional file 6: Dataset S5. Protein and pathway data required for interactive mapping. [file 13068_2018_1350_MOESM6_ESM.xlsx]

## Sheet: edge-Cys
	Subject_id	PATHWAY
0	A0A0J5PJ36	ABC transporters
1	A0A0J5PVF9	ABC transporters
2	A0A0J5PLK3	ABC transporters
3	A0A0J5PLK3	Peroxisome
4	A0A0J5Q3U7	ABC transporters
5	A0A0J5SQG5	AGE-RAGE signaling pathway in diabetic complications
6	A0A0J5SQG5	Autophagy - yeast
7	A0A0J5PZB8	AGE-RAGE signaling pathway in diabetic complications
8	A0A0J5PZB8	Autophagy - yeast
9	A0A0J5Q4B9	AGE-RAGE signaling pathway in diabetic complications
10	A0A0J5Q4B9	MAPK signaling pathway - yeast
11	A0A0J5Q4B9	Mitophagy - yeast
12	A0A0J5PNC9	AGE-RAGE signaling pathway in diabetic complications
13	A0A0J5PNC9	Endocytosis
14	A0A0J5PNC9	MAPK signaling pathway - yeast
15	A0A0J5PZS3	AGE-RAGE signaling pathway in diabetic complications
16	A0A0J5Q135	AGE-RAGE signaling pathway in diabetic complications
17	A0A0J5Q135	Inositol phosphate metabolism
18	A0A0J5Q135	Phosphatidylinositol signaling system
19	A0A0J5T0H6	AGE-RAGE signaling pathway in diabetic complications
20	A0A0J5T0H6	MAPK signaling pathway - yeast
21	A0A0J5PVZ9	AGE-RAGE signaling pathway in diabetic complications
22	A0A0J5PVZ9	MAPK signaling pathway - yeast
23	A0A0J5PVZ9	Mitophagy - yeast
24	A0A0J5PVZ9	Phosphatidylinositol signaling system
25	A0A0J5Q842	Alanine, aspartate and glutamate metabolism
26	A0A0J5PRB3	Alanine, aspartate and glutamate metabolism
27	A0A0J5PRB3	Arginine biosynthesis
28	A0A0J5PDC7	Alanine, aspartate and glutamate metabolism
29	A0A0J5PLG3	Alanine, aspartate and glutamate metabolism
30	A0A0J5PLG3	Cyanoamino acid metabolism
31	A0A0J5PFR2	Alanine, aspartate and glutamate metabolism
32	A0A0J5PFR2	Butanoate metabolism
33	A0A0J5PFR2	Lysine degradation
34	A0A0J5PFR2	Nicotinate and nicotinamide metabolism
35	A0A0J5PFR2	Tyrosine metabolism
36	A0A0J5PFR2	Alanine, aspartate and glutamate metabolism
37	A0A0J5PFR2	Butanoate metabolism
38	A0A0J5PFR2	Lysine degradation
39	A0A0J5PFR2	Nicotinate and nicotinamide metabolism
40	A0A0J5PFR2	Tyrosine metabolism
41	A0A0J5PFX3	Alanine, aspartate and glutamate metabolism
42	A0A0J5PFX3	Arginine biosynthesis
43	A0A0J5PFX3	Glyoxylate and dicarboxylate metabolism
44	A0A0J5PFX3	Nitrogen metabolism
45	A0A0J5SXD9	Alanine, aspartate and glutamate metabolism
46	A0A0J5SXD9	Arginine biosynthesis
47	A0A0J5SXD9	Glyoxylate and dicarboxylate metabolism
48	A0A0J5SXD9	Nitrogen metabolism
49	A0A0J5PMF1	Alanine, aspartate and glutamate metabolism
50	A0A0J5PMF1	Cyanoamino acid metabolism
51	A0A0J5Q858	Alanine, aspartate and glutamate metabolism
52	A0A0J5Q858	Butanoate metabolism
53	A0A0J5Q858	Taurine and hypotaurine metabolism
54	A0A0J5Q858	beta-Alanine metabolism
55	A0A0J5PYX8	Alanine, aspartate and glutamate metabolism
56	A0A0J5PYX8	Purine metabolism
57	A0A0J5PFL4	Alanine, aspartate and glutamate metabolism
58	A0A0J5PFL4	Purine metabolism
59	A0A0J5PDB2	Alanine, aspartate and glutamate metabolism
60	A0A0J5PDB2	Arginine biosynthesis
61	A0A0J5PDB2	Nitrogen metabolism
62	A0A0J5PH33	Alanine, aspartate and glutamate metabolism
63	A0A0J5PH33	Purine metabolism
64	A0A0J5Q2U5	Alanine, aspartate and glutamate metabolism
65	A0A0J5Q2U5	Arginine and proline metabolism
66	A0A0J5PVK3	Alanine, aspartate and glutamate metabolism
67	A0A0J5PVK3	Butanoate metabolism
68	A0A0J5PUD2	Alanine, aspartate and glutamate metabolism
69	A0A0J5PUD2	Butanoate metabolism
70	A0A0J5PUD2	Taurine and hypotaurine metabolism
71	A0A0J5PUD2	beta-Alanine metabolism
72	A0A0J5PX25	Alanine, aspartate and glutamate metabolism
73	A0A0J5PX25	Glycine, serine and threonine metabolism
74	A0A0J5PX25	Glyoxylate and dicarboxylate metabolism
75	A0A0J5PX25	Methane metabolism
76	A0A0J5PX25	Peroxisome
77	A0A0J5SYU2	Alanine, aspartate and glutamate metabolism
78	A0A0J5SYU2	Amino sugar and nucleotide sugar metabolism
79	A0A0J5Q3K5	Alanine, aspartate and glutamate metabolism
80	A0A0J5Q3K5	Pyrimidine metabolism
81	A0A0J5PVL3	Alanine, aspartate and glutamate metabolism
82	A0A0J5PVL3	Butanoate metabolism
83	A0A0J5PVL3	Propanoate metabolism
84	A0A0J5PVL3	Valine, leucine and isoleucine degradation
85	A0A0J5PVL3	beta-Alanine metabolism
86	A0A0J5T051	Alanine, aspartate and glutamate metabolism
87	A0A0J5T051	Pyrimidine metabolism
88	A0A0J5PVM1	Alanine, aspartate and glutamate metabolism
89	A0A0J5PVM1	Pyrimidine metabolism
90	A0A0J5PW89	Alanine, aspartate and glutamate metabolism
91	A0A0J5PW89	Nitrogen metabolism
92	A0A0J5SW53	Alanine, aspartate and glutamate metabolism
93	A0A0J5SW53	Arginine and proline metabolism
94	A0A0J5SW53	Arginine biosynthesis
95	A0A0J5SW53	Cysteine and methionine metabolism
96	A0A0J5SW53	Phenylalanine metabolism
97	A0A0J5SW53	Phenylalanine, tyrosine and tryptophan biosynthesis
98	A0A0J5SW53	Tyrosine metabolism
99	A0A0J5SDB7	Alanine, aspartate and glutamate metabolism
100	A0A0J5SDB7	Arginine and proline metabolism
101	A0A0J5SDB7	Arginine biosynthesis
102	A0A0J5SDB7	Cysteine and methionine metabolism
103	A0A0J5SDB7	Phenylalanine metabolism
104	A0A0J5SDB7	Phenylalanine, tyrosine and tryptophan biosynthesis
105	A0A0J5SDB7	Tyrosine metabolism
106	A0A0J5PNF3	Alanine, aspartate and glutamate metabolism
107	A0A0J5PNF3	Arginine biosynthesis
108	A0A0J5PNF3	Nitrogen metabolism
109	A0A0J5PNF3	Taurine and hypotaurine metabolism
110	A0A0J5PVE2	Alanine, aspartate and glutamate metabolism
111	A0A0J5PVE2	Arginine biosynthesis
112	A0A0J5Q5M2	Alanine, aspartate and glutamate metabolism
113	A0A0J5Q5M2	Arginine biosynthesis
114	A0A0J5PL46	Amino sugar and nucleotide sugar metabolism
115	A0A0J5PL46	Fructose and mannose metabolism
116	A0A0J5PL46	Galactose metabolism
117	A0A0J5PL46	Glycolysis / Gluconeogenesis
118	A0A0J5PL46	Starch and sucrose metabolism
119	A0A0J5PIG3	Amino sugar and nucleotide sugar metabolism
120	A0A0J5Q487	Amino sugar and nucleotide sugar metabolism
121	A0A0J5Q487	Fructose and mannose metabolism
122	A0A0J5SWV3	Amino sugar and nucleotide sugar metabolism
123	A0A0J5SWV3	Glycosaminoglycan degradation
124	A0A0J5SWV3	Glycosphingolipid biosynthesis - globo and isoglobo series
125	A0A0J5SWV3	Various types of N-glycan biosynthesis
126	A0A0J5PQ76	Amino sugar and nucleotide sugar metabolism
127	A0A0J5PEM5	Amino sugar and nucleotide sugar metabolism
128	A0A0J5PEM5	Fructose and mannose metabolism
129	A0A0J5Q5K8	Amino sugar and nucleotide sugar metabolism
130	A0A0J5Q5K8	Fructose and mannose metabolism
131	A0A0J5PRN9	Amino sugar and nucleotide sugar metabolism
132	A0A0J5PRN9	Fructose and mannose metabolism
133	A0A0J5PRN9	Galactose metabolism
134	A0A0J5PRN9	Glycolysis / Gluconeogenesis
135	A0A0J5PRN9	Starch and sucrose metabolism
136	A0A0J5SRD4	Amino sugar and nucleotide sugar metabolism
137	A0A0J5SRD4	Glycosaminoglycan degradation
138	A0A0J5SQA8	Amino sugar and nucleotide sugar metabolism
139	A0A0J5SQA8	Galactose metabolism
140	A0A0J5Q140	Amino sugar and nucleotide sugar metabolism
141	A0A0J5SUS4	Amino sugar and nucleotide sugar metabolism
142	A0A0J5PI71	Amino sugar and nucleotide sugar metabolism
143	A0A0J5PI71	Fructose and mannose metabolism
144	A0A0J5PI71	Galactose metabolism
145	A0A0J5PI71	Glycolysis / Gluconeogenesis
146	A0A0J5PI71	Starch and sucrose metabolism
147	A0A0J5PND6	Amino sugar and nucleotide sugar metabolism
148	A0A0J5PND6	Glycosaminoglycan degradation
149	A0A0J5PJT8	Amino sugar and nucleotide sugar metabolism
150	A0A0J5PJT8	Glycosaminoglycan degradation
151	A0A0J5PJT8	Glycosphingolipid biosynthesis - globo and isoglobo series
152	A0A0J5PJT8	Various types of N-glycan biosynthesis
153	A0A0J5SG28	Amino sugar and nucleotide sugar metabolism
154	A0A0J5PUR8	Amino sugar and nucleotide sugar metabolism
155	A0A0J5SGH4	Amino sugar and nucleotide sugar metabolism
156	A0A0J5PU67	Amino sugar and nucleotide sugar metabolism
157	A0A0J5PR13	Amino sugar and nucleotide sugar metabolism
158	A0A0J5PVA6	Amino sugar and nucleotide sugar metabolism
159	A0A0J5PVA6	Amino sugar and nucleotide sugar metabolism
160	A0A0J5PU74	Amino sugar and nucleotide sugar metabolism
161	A0A0J5PKG8	Amino sugar and nucleotide sugar metabolism
162	A0A0J5PKG8	Amino sugar and nucleotide sugar metabolism
163	A0A0J5SRT2	Amino sugar and nucleotide sugar metabolism
164	A0A0J5SRT2	Galactose metabolism
165	A0A0J5SW43	Amino sugar and nucleotide sugar metabolism
166	A0A0J5SW43	Glycolysis / Gluconeogenesis
167	A0A0J5SW43	Pentose phosphate pathway
168	A0A0J5SW43	Starch and sucrose metabolism
169	A0A0J5PYJ4	Amino sugar and nucleotide sugar metabolism
170	A0A0J5PZ06	Amino sugar and nucleotide sugar metabolism
171	A0A0J5PZ06	Galactose metabolism
172	A0A0J5SJ25	Amino sugar and nucleotide sugar metabolism
173	A0A0J5PI52	Amino sugar and nucleotide sugar metabolism
174	A0A0J5PNR4	Amino sugar and nucleotide sugar metabolism
175	A0A0J5Q2U0	Amino sugar and nucleotide sugar metabolism
176	A0A0J5SX59	Amino sugar and nucleotide sugar metabolism
177	A0A0J5SV51	Amino sugar and nucleotide sugar metabolism
178	A0A0J5PNX4	Amino sugar and nucleotide sugar metabolism
179	A0A0J5PU23	Amino sugar and nucleotide sugar metabolism
180	A0A0J5PU23	Galactose metabolism
181	A0A0J5PU23	Glycolysis / Gluconeogenesis
182	A0A0J5PU23	Pentose phosphate pathway
183	A0A0J5PU23	Purine metabolism
184	A0A0J5PU23	Starch and sucrose metabolism
185	A0A0J5PHR2	Amino sugar and nucleotide sugar metabolism
186	A0A0J5PHR2	Galactose metabolism
187	A0A0J5PHR2	Pentose and glucuronate interconversions
188	A0A0J5PHR2	Starch and sucrose metabolism
189	A0A0J5PK41	Amino sugar and nucleotide sugar metabolism
190	A0A0J5PK41	Amino sugar and nucleotide sugar metabolism
191	A0A0J5PSJ4	Amino sugar and nucleotide sugar metabolism
192	A0A0J5SYW3	Amino sugar and nucleotide sugar metabolism
193	A0A0J5SYW3	Fructose and mannose metabolism
194	A0A0J5SDV4	Amino sugar and nucleotide sugar metabolism
195	A0A0J5PM58	Amino sugar and nucleotide sugar metabolism
196	A0A0J5PM58	Amino sugar and nucleotide sugar metabolism
197	A0A0J5PNT7	Amino sugar and nucleotide sugar metabolism
198	A0A0J5PSJ2	Amino sugar and nucleotide sugar metabolism
199	A0A0J5PSJ2	Fructose and mannose metabolism
200	A0A0J5PU31	Arachidonic acid metabolism
201	A0A0J5PU31	Glutathione metabolism
202	A0A0J5Q2U3	Arachidonic acid metabolism
203	A0A0J5SQ14	Arginine and proline metabolism
204	A0A0J5SQ14	beta-Alanine metabolism
205	A0A0J5PHW0	Arginine and proline metabolism
206	A0A0J5PHW0	beta-Alanine metabolism
207	A0A0J5Q2G1	Arginine and proline metabolism
208	A0A0J5Q2G1	Phenylalanine metabolism
209	A0A0J5Q2G1	Tryptophan metabolism
210	A0A0J5PH80	Arginine and proline metabolism
211	A0A0J5PH80	Phenylalanine metabolism
212	A0A0J5PH80	Tryptophan metabolism
213	A0A0J5PH80	Glycosylphosphatidylinositol (GPI)-anchor biosynthesis
214	A0A0J5Q3I8	Arginine and proline metabolism
215	A0A0J5Q3I8	Ascorbate and aldarate metabolism
216	A0A0J5Q3I8	Fatty acid degradation
217	A0A0J5Q3I8	Glycerolipid metabolism
218	A0A0J5Q3I8	Glycolysis / Gluconeogenesis
219	A0A0J5Q3I8	Histidine metabolism
220	A0A0J5Q3I8	Lysine degradation
221	A0A0J5Q3I8	Pyruvate metabolism
222	A0A0J5Q3I8	Tryptophan metabolism
223	A0A0J5Q3I8	Valine, leucine and isoleucine degradation
224	A0A0J5Q3I8	beta-Alanine metabolism
225	A0A0J5PHJ6	Arginine and proline metabolism
226	A0A0J5PHJ6	Ascorbate and aldarate metabolism
227	A0A0J5PHJ6	Fatty acid degradation
228	A0A0J5PHJ6	Glycerolipid metabolism
229	A0A0J5PHJ6	Glycolysis / Gluconeogenesis
230	A0A0J5PHJ6	Histidine metabolism
231	A0A0J5PHJ6	Lysine degradation
232	A0A0J5PHJ6	Pyruvate metabolism
233	A0A0J5PHJ6	Tryptophan metabolism
234	A0A0J5PHJ6	Valine, leucine and isoleucine degradation
235	A0A0J5PHJ6	beta-Alanine metabolism
236	A0A0J5Q1I4	Arginine and proline metabolism
237	A0A0J5PRM8	Arginine and proline metabolism
238	A0A0J5Q1V0	Arginine and proline metabolism
239	A0A0J5PJ32	Arginine and proline metabolism
240	A0A0J5PJ32	Phenylalanine metabolism
241	A0A0J5PJ32	Tryptophan metabolism
242	A0A0J5PT46	Arginine and proline metabolism
243	A0A0J5PT46	D-Arginine and D-ornithine metabolism
244	A0A0J5PT46	Glycine, serine and threonine metabolism
245	A0A0J5PT46	Penicillin and cephalosporin biosynthesis
246	A0A0J5PT46	Peroxisome
247	A0A0J5PU58	Arginine and proline metabolism
248	A0A0J5PU58	Arginine biosynthesis
249	A0A0J5PPU9	Arginine and proline metabolism
250	A0A0J5PPU9	Pyrimidine metabolism
251	A0A0J5PTZ5	Arginine and proline metabolism
252	A0A0J5PTZ5	Glycine, serine and threonine metabolism
253	A0A0J5PTZ5	Histidine metabolism
254	A0A0J5PTZ5	Phenylalanine metabolism
255	A0A0J5PTZ5	Tryptophan metabolism
256	A0A0J5PTZ5	Tyrosine metabolism
257	A0A0J5Q351	Arginine and proline metabolism
258	A0A0J5Q351	D-Arginine and D-ornithine metabolism
259	A0A0J5Q351	Glycine, serine and threonine metabolism
260	A0A0J5Q351	Penicillin and cephalosporin biosynthesis
261	A0A0J5Q351	Peroxisome
262	A0A0J5Q318	Arginine and proline metabolism
263	A0A0J5Q318	Ascorbate and aldarate metabolism
264	A0A0J5Q318	Fatty acid degradation
265	A0A0J5Q318	Glycerolipid metabolism
266	A0A0J5Q318	Glycolysis / Gluconeogenesis
267	A0A0J5Q318	Histidine metabolism
268	A0A0J5Q318	Lysine degradation
269	A0A0J5Q318	Pyruvate metabolism
270	A0A0J5Q318	Tryptophan metabolism
271	A0A0J5Q318	Valine, leucine and isoleucine degradation
272	A0A0J5Q318	beta-Alanine metabolism
273	A0A0J5PMP4	Arginine and proline metabolism
274	A0A0J5PZV4	Arginine and proline metabolism
275	A0A0J5PZV4	Glyoxylate and dicarboxylate metabolism
276	A0A0J5PG20	Arginine and proline metabolism
277	A0A0J5Q2Q7	Arginine and proline metabolism
278	A0A0J5PW88	Arginine and proline metabolism
279	A0A0J5PW88	Phenylalanine metabolism
280	A0A0J5PW88	Tryptophan metabolism
281	A0A0J5SWN6	Arginine and proline metabolism
282	A0A0J5SWN6	Carbapenem biosynthesis
283	A0A0J5PRG6	Arginine and proline metabolism
284	A0A0J5SNU1	Arginine and proline metabolism
285	A0A0J5SNU1	Cysteine and methionine metabolism
286	A0A0J5Q579	Arginine and proline metabolism
287	A0A0J5Q579	Cysteine and methionine metabolism
288	A0A0J5Q579	Glutathione metabolism
289	A0A0J5Q579	beta-Alanine metabolism
290	A0A0J5PS07	Arginine biosynthesis
291	A0A0J5Q325	Arginine biosynthesis
292	A0A0J5PI13	Arginine biosynthesis
293	A0A0J5PI13	SNARE interactions in vesicular transport
294	A0A0J5PLM1	Arginine biosynthesis
295	A0A0J5PLM1	Atrazine degradation
296	A0A0J5PLM1	Purine metabolism
297	A0A0J5Q6E8	Arginine biosynthesis
298	A0A0J5SFH6	Arginine biosynthesis
299	A0A0J5SFH6	Atrazine degradation
300	A0A0J5SCF2	Arginine biosynthesis
301	A0A0J5Q364	Autophagy - yeast
302	A0A0J5PE77	Autophagy - yeast
303	A0A0J5PE77	Mitophagy - yeast
304	A0A0J5PKQ8	Autophagy - yeast
305	A0A0J5PKQ8	Inositol phosphate metabolism
306	A0A0J5PKQ8	Phosphatidylinositol signaling system
307	A0A0J5PXL4	Autophagy - yeast
308	A0A0J5PVR8	Autophagy - yeast
309	A0A0J5Q3A7	Autophagy - yeast
310	A0A0J5Q3A7	mRNA surveillance pathway
311	A0A0J5SQM2	Autophagy - yeast
312	A0A0J5SQM2	Endocytosis
313	A0A0J5PFG8	Autophagy - yeast
314	A0A0J5PFG8	Endocytosis
315	A0A0J5Q5Y5	Autophagy - yeast
316	A0A0J5Q5Y5	Phosphatidylinositol signaling system
317	A0A0J5PYL1	Autophagy - yeast
318	A0A0J5PYL1	Glycerolipid metabolism
319	A0A0J5Q483	Autophagy - yeast
320	A0A0J5PVX5	Autophagy - yeast
321	A0A0J5SFJ7	Autophagy - yeast
322	A0A0J5PWI2	Autophagy - yeast
323	A0A0J5PWI2	Protein processing in endoplasmic reticulum
324	A0A0J5PWI2	RNA transport
325	A0A0J5PYD8	Autophagy - yeast
326	A0A0J5PQT3	Autophagy - yeast
327	A0A0J5PQT3	SNARE interactions in vesicular transport
328	A0A0J5PU80	Autophagy - yeast
329	A0A0J5PVW1	Autophagy - yeast
330	A0A0J5PVW1	Inositol phosphate metabolism
331	A0A0J5PVW1	Phosphatidylinositol signaling system
332	A0A0J5PG49	Autophagy - yeast
333	A0A0J5PG49	Sphingolipid metabolism
334	A0A0J5PRS1	Autophagy - yeast
335	A0A0J5PVJ1	Autophagy - yeast
336	A0A0J5PVB2	Autophagy - yeast
337	A0A0J5PHV5	Autophagy - yeast
338	A0A0J5PWR6	Autophagy - yeast
339	A0A0J5PTI3	Autophagy - yeast
340	A0A0J5PTI3	Mitophagy - yeast
341	A0A0J5Q426	Autophagy - yeast
342	A0A0J5PY94	Autophagy - yeast
343	A0A0J5Q7I7	Autophagy - yeast
344	A0A0J5PZZ2	Autophagy - yeast
345	A0A0J5PRN6	Autophagy - yeast
346	A0A0J5PRN6	Protein processing in endoplasmic reticulum
347	A0A0J5PYD9	Autophagy - yeast
348	A0A0J5Q1I3	Autophagy - yeast
349	A0A0J5PPD8	Autophagy - yeast
350	A0A0J5PYG8	Autophagy - yeast
351	A0A0J5PVW8	Autophagy - yeast
352	A0A0J5PHT7	Autophagy - yeast
353	A0A0J5PHT7	SNARE interactions in vesicular transport
354	A0A0J5Q6V6	Autophagy - yeast
355	A0A0J5PWZ1	Autophagy - yeast
356	A0A0J5PWZ1	Mitophagy - yeast
357	A0A0J5SYI0	Autophagy - yeast
358	A0A0J5PYQ2	Autophagy - yeast
359	A0A0J5PYQ2	Mitophagy - yeast
360	A0A0J5Q167	Autophagy - yeast
361	A0A0J5PT50	Autophagy - yeast
362	A0A0J5PDY9	Autophagy - yeast
363	A0A0J5PDY9	SNARE interactions in vesicular transport
364	A0A0J5PM26	Autophagy - yeast
365	A0A0J5PM26	MAPK signaling pathway - yeast
366	A0A0J5PM26	Mitophagy - yeast
367	A0A0J5PXI1	Biotin metabolism
368	A0A0J5PXI1	Fatty acid biosynthesis
369	A0A0J5PFM5	Biotin metabolism
370	A0A0J5PQP0	Biotin metabolism
371	A0A0J5PQP0	Fatty acid biosynthesis
372	A0A0J5PYV4	Biotin metabolism
373	A0A0J5PXA6	Biotin metabolism
374	A0A0J5PXA6	Fatty acid biosynthesis
375	A0A0J5PSK5	Butanoate metabolism
376	A0A0J5PSK5	Synthesis and degradation of ketone bodies
377	A0A0J5Q7E1	Butanoate metabolism
378	A0A0J5Q7E1	Fatty acid degradation
379	A0A0J5Q7E1	Glyoxylate and dicarboxylate metabolism
380	A0A0J5Q7E1	Lysine degradation
381	A0A0J5Q7E1	Propanoate metabolism
382	A0A0J5Q7E1	Pyruvate metabolism
383	A0A0J5Q7E1	Synthesis and degradation of ketone bodies
384	A0A0J5Q7E1	Terpenoid backbone biosynthesis
385	A0A0J5Q7E1	Tryptophan metabolism
386	A0A0J5Q7E1	Valine, leucine and isoleucine degradation
387	A0A0J5PUH2	Butanoate metabolism
388	A0A0J5PUH2	C5-Branched dibasic acid metabolism
389	A0A0J5PUH2	Pantothenate and CoA biosynthesis
390	A0A0J5PUH2	Valine, leucine and isoleucine biosynthesis
391	A0A0J5PJI6	Butanoate metabolism
392	A0A0J5PJI6	Fatty acid degradation
393	A0A0J5PJI6	Glyoxylate and dicarboxylate metabolism
394	A0A0J5PJI6	Lysine degradation
395	A0A0J5PJI6	Propanoate metabolism
396	A0A0J5PJI6	Pyruvate metabolism
397	A0A0J5PJI6	Synthesis and degradation of ketone bodies
398	A0A0J5PJI6	Terpenoid backbone biosynthesis
399	A0A0J5PJI6	Tryptophan metabolism
400	A0A0J5PJI6	Valine, leucine and isoleucine degradation
401	A0A0J5Q3D9	Butanoate metabolism
402	A0A0J5Q3D9	Fatty acid degradation
403	A0A0J5Q3D9	Fatty acid elongation
404	A0A0J5Q3D9	Lysine degradation
405	A0A0J5Q3D9	Propanoate metabolism
406	A0A0J5Q3D9	Tryptophan metabolism
407	A0A0J5Q3D9	Valine, leucine and isoleucine degradation
408	A0A0J5Q3D9	beta-Alanine metabolism
409	A0A0J5PN31	Butanoate metabolism
410	A0A0J5PN31	Valine, leucine and isoleucine degradation
411	A0A0J5PYC7	Butanoate metabolism
412	A0A0J5PYC7	Peroxisome
413	A0A0J5PYC7	Synthesis and degradation of ketone bodies
414	A0A0J5PYC7	Valine, leucine and isoleucine degradation
415	A0A0J5PKI4	Butanoate metabolism
416	A0A0J5PKI4	Fatty acid degradation
417	A0A0J5PKI4	Fatty acid elongation
418	A0A0J5PKI4	Lysine degradation
419	A0A0J5PKI4	Propanoate metabolism
420	A0A0J5PKI4	Tryptophan metabolism
421	A0A0J5PKI4	Valine, leucine and isoleucine degradation
422	A0A0J5PKI4	beta-Alanine metabolism
423	A0A0J5ST49	Butanoate metabolism
424	A0A0J5ST49	Synthesis and degradation of ketone bodies
425	A0A0J5ST49	Valine, leucine and isoleucine degradation
426	A0A0J5PRW4	Butanoate metabolism
427	A0A0J5PRW4	Phenylalanine metabolism
428	A0A0J5PYL9	Butanoate metabolism
429	A0A0J5PYL9	Synthesis and degradation of ketone bodies
430	A0A0J5PYL9	Terpenoid backbone biosynthesis
431	A0A0J5PYL9	Valine, leucine and isoleucine degradation
432	A0A0J5Q3N8	Butanoate metabolism
433	A0A0J5Q3N8	Synthesis and degradation of ketone bodies
434	A0A0J5Q3N8	Valine, leucine and isoleucine degradation
435	A0A0J5SFF5	C5-Branched dibasic acid metabolism
436	A0A0J5SFF5	Valine, leucine and isoleucine biosynthesis
437	A0A0J5Q866	C5-Branched dibasic acid metabolism
438	A0A0J5Q866	Valine, leucine and isoleucine biosynthesis
439	A0A0J5PEN3	Caffeine metabolism
440	A0A0J5PEN3	Peroxisome
441	A0A0J5PEN3	Purine metabolism
442	A0A0J5Q240	Caffeine metabolism
443	A0A0J5Q240	Purine metabolism
444	A0A0J5SH00	Carotenoid biosynthesis
445	A0A0J5PVK1	Citrate cycle (TCA cycle)
446	A0A0J5PVK1	Oxidative phosphorylation
447	A0A0J5PSP3	Citrate cycle (TCA cycle)
448	A0A0J5PSP3	Oxidative phosphorylation
449	A0A0J5SE17	Citrate cycle (TCA cycle)
450	A0A0J5SE17	Cysteine and methionine metabolism
451	A0A0J5SE17	Glyoxylate and dicarboxylate metabolism
452	A0A0J5SE17	Pyruvate metabolism
453	A0A0J5T0I4	Citrate cycle (TCA cycle)
454	A0A0J5T0I4	Glyoxylate and dicarboxylate metabolism
455	A0A0J5PGW6	Citrate cycle (TCA cycle)
456	A0A0J5PGW6	Pyruvate metabolism
457	A0A0J5Q7F7	Citrate cycle (TCA cycle)
458	A0A0J5Q1X2	Citrate cycle (TCA cycle)
459	A0A0J5Q5H1	Citrate cycle (TCA cycle)
460	A0A0J5PV58	Citrate cycle (TCA cycle)
461	A0A0J5PV58	Oxidative phosphorylation
462	A0A0J5PLJ1	Citrate cycle (TCA cycle)
463	A0A0J5PLJ1	Glycolysis / Gluconeogenesis
464	A0A0J5PLJ1	Pyruvate metabolism
465	A0A0J5PGP7	Citrate cycle (TCA cycle)
466	A0A0J5PGP7	Lysine degradation
467	A0A0J5PGP7	Tryptophan metabolism
468	A0A0J5ST22	Citrate cycle (TCA cycle)
469	A0A0J5ST22	Lysine degradation
470	A0A0J5PHV0	Citrate cycle (TCA cycle)
471	A0A0J5PHV0	Cysteine and methionine metabolism
472	A0A0J5PHV0	Glyoxylate and dicarboxylate metabolism
473	A0A0J5PHV0	Pyruvate metabolism
474	A0A0J5PV41	Citrate cycle (TCA cycle)
475	A0A0J5PV41	Glyoxylate and dicarboxylate metabolism
476	A0A0J5SEH0	Citrate cycle (TCA cycle)
477	A0A0J5SEH0	Glyoxylate and dicarboxylate metabolism
478	A0A0J5ST40	Citrate cycle (TCA cycle)
479	A0A0J5ST40	Glycolysis / Gluconeogenesis
480	A0A0J5ST40	Pyruvate metabolism
481	A0A0J5Q3B6	Citrate cycle (TCA cycle)
482	A0A0J5PJC2	Citrate cycle (TCA cycle)
483	A0A0J5PJC2	Pyruvate metabolism
484	A0A0J5PNK4	Citrate cycle (TCA cycle)
485	A0A0J5PNK4	Propanoate metabolism
486	A0A0J5PUK5	Citrate cycle (TCA cycle)
487	A0A0J5PUK5	Propanoate metabolism
488	A0A0J5Q5L7	Citrate cycle (TCA cycle)
489	A0A0J5Q5L7	Glycolysis / Gluconeogenesis
490	A0A0J5Q5L7	Pyruvate metabolism
491	A0A0J5Q4K6	Citrate cycle (TCA cycle)
492	A0A0J5Q4K6	Glycine, serine and threonine metabolism
493	A0A0J5Q4K6	Glycolysis / Gluconeogenesis
494	A0A0J5Q4K6	Glyoxylate and dicarboxylate metabolism
495	A0A0J5Q4K6	Propanoate metabolism
496	A0A0J5Q4K6	Pyruvate metabolism
497	A0A0J5Q4K6	Valine, leucine and isoleucine degradation
498	A0A0J5PUW3	Citrate cycle (TCA cycle)
499	A0A0J5PUW3	Glutathione metabolism
500	A0A0J5PUW3	Peroxisome
501	A0A0J5PP80	Citrate cycle (TCA cycle)
502	A0A0J5PP80	Glycolysis / Gluconeogenesis
503	A0A0J5PP80	Pyruvate metabolism
504	A0A0J5PM17	Cyanoamino acid metabolism
505	A0A0J5PM17	Glutathione metabolism
506	A0A0J5PM17	Taurine and hypotaurine metabolism
507	A0A0J5PZT3	Cyanoamino acid metabolism
508	A0A0J5PZT3	Glycine, serine and threonine metabolism
509	A0A0J5PZT3	Glyoxylate and dicarboxylate metabolism
510	A0A0J5PZT3	Methane metabolism
511	A0A0J5PZT3	One carbon pool by folate
512	A0A0J5PI79	Cyanoamino acid metabolism
513	A0A0J5PI79	Glutathione metabolism
514	A0A0J5PI79	Taurine and hypotaurine metabolism
515	A0A0J5PYX9	Cyanoamino acid metabolism
516	A0A0J5PYX9	Glycine, serine and threonine metabolism
517	A0A0J5PYX9	Glyoxylate and dicarboxylate metabolism
518	A0A0J5PYX9	Methane metabolism
519	A0A0J5PYX9	One carbon pool by folate
520	A0A0J5PUU1	Cyanoamino acid metabolism
521	A0A0J5PUU1	Starch and sucrose metabolism
522	A0A0J5Q2T9	Cyanoamino acid metabolism
523	A0A0J5Q2T9	Starch and sucrose metabolism
524	A0A0J5PIZ9	Cyanoamino acid metabolism
525	A0A0J5PIZ9	Starch and sucrose metabolism
526	A0A0J5PRS7	Cyanoamino acid metabolism
527	A0A0J5PRS7	Starch and sucrose metabolism
528	A0A0J5SR71	Cyanoamino acid metabolism
529	A0A0J5SR71	Starch and sucrose metabolism
530	A0A0J5Q018	Cyanoamino acid metabolism
531	A0A0J5Q018	Glyoxylate and dicarboxylate metabolism
532	A0A0J5Q018	Nitrogen metabolism
533	A0A0J5PIB4	Cyanoamino acid metabolism
534	A0A0J5PIB4	Starch and sucrose metabolism
535	A0A0J5PGQ9	Cyanoamino acid metabolism
536	A0A0J5PGQ9	Starch and sucrose metabolism
537	A0A0J5T0Y2	Cyanoamino acid metabolism
538	A0A0J5T0Y2	Starch and sucrose metabolism
539	A0A0J5SJ64	Cyanoamino acid metabolism
540	A0A0J5SJ64	Starch and sucrose metabolism
541	A0A0J5PKB4	Cyanoamino acid metabolism
542	A0A0J5PKB4	Starch and sucrose metabolism
543	A0A0J5T0N9	Cyanoamino acid metabolism
544	A0A0J5T0N9	Nitrogen metabolism
545	A0A0J5T0N9	Tryptophan metabolism
546	A0A0J5PKL5	Cyanoamino acid metabolism
547	A0A0J5PKL5	Starch and sucrose metabolism
548	A0A0J5PKR8	Cysteine and methionine metabolism
549	A0A0J5PKR8	Sulfur metabolism
550	A0A0J5PRM6	Cysteine and methionine metabolism
551	A0A0J5PRM6	Glutathione metabolism
552	A0A0J5PF83	Cysteine and methionine metabolism
553	A0A0J5PMG9	Cysteine and methionine metabolism
554	A0A0J5PMG9	Sulfur metabolism
555	A0A0J5Q114	Cysteine and methionine metabolism
556	A0A0J5Q0B6	Cysteine and methionine metabolism
557	A0A0J5PJM4	Cysteine and methionine metabolism
558	A0A0J5PJM4	Selenocompound metabolism
559	A0A0J5PN10	Cysteine and methionine metabolism
560	A0A0J5PN10	Selenocompound metabolism
561	A0A0J5PZU4	Cysteine and methionine metabolism
562	A0A0J5PZU4	Glycine, serine and threonine metabolism
563	A0A0J5PR33	Cysteine and methionine metabolism
564	A0A0J5PR33	Sulfur metabolism
565	A0A0J5PR65	Cysteine and methionine metabolism
566	A0A0J5PR65	Sulfur metabolism
567	A0A0J5PYH6	Cysteine and methionine metabolism
568	A0A0J5PYH6	Lysine biosynthesis
569	A0A0J5PYH6	Phenylalanine metabolism
570	A0A0J5PYH6	Phenylalanine, tyrosine and tryptophan biosynthesis
571	A0A0J5PYH6	Tryptophan metabolism
572	A0A0J5PYH6	Tyrosine metabolism
573	A0A0J5PYH6	Ubiquinone and other terpenoid-quinone biosynthesis
574	A0A0J5Q036	Cysteine and methionine metabolism
575	A0A0J5PWY7	Cysteine and methionine metabolism
576	A0A0J5PWY7	Glycine, serine and threonine metabolism
577	A0A0J5PWY7	Lysine biosynthesis
578	A0A0J5PVQ9	Cysteine and methionine metabolism
579	A0A0J5PVQ9	Selenocompound metabolism
580	A0A0J5PVQ9	Sulfur metabolism
581	A0A0J5Q0V8	Cysteine and methionine metabolism
582	A0A0J5PFJ6	Cysteine and methionine metabolism
583	A0A0J5PFJ6	Selenocompound metabolism
584	A0A0J5PD67	Cysteine and methionine metabolism
585	A0A0J5PD67	Pantothenate and CoA biosynthesis
586	A0A0J5PD67	Valine, leucine and isoleucine biosynthesis
587	A0A0J5PD67	Valine, leucine and isoleucine degradation
588	A0A0J5SK20	Cysteine and methionine metabolism
589	A0A0J5SK20	Pantothenate and CoA biosynthesis
590	A0A0J5SK20	Valine, leucine and isoleucine biosynthesis
591	A0A0J5SK20	Valine, leucine and isoleucine degradation
592	A0A0J5PTL2	Cysteine and methionine metabolism
593	A0A0J5PTL2	Glutathione metabolism
594	A0A0J5PKK2	Cysteine and methionine metabolism
595	A0A0J5PKK2	Glycine, serine and threonine metabolism
596	A0A0J5PKK2	Valine, leucine and isoleucine biosynthesis
597	A0A0J5Q5X5	Cysteine and methionine metabolism
598	A0A0J5SQW8	Cysteine and methionine metabolism
599	A0A0J5SQW8	Glutathione metabolism
600	A0A0J5SE88	Cysteine and methionine metabolism
601	A0A0J5PVM7	Cysteine and methionine metabolism
602	A0A0J5PVM7	Glycine, serine and threonine metabolism
603	A0A0J5PVM7	Lysine biosynthesis
604	A0A0J5PVM7	Monobactam biosynthesis
605	A0A0J5PVM7	Pyruvate metabolism
606	A0A0J5PJB6	Cysteine and methionine metabolism
607	A0A0J5PJB6	Glycine, serine and threonine metabolism
608	A0A0J5PJB6	Selenocompound metabolism
609	A0A0J5PDM4	Endocytosis
610	A0A0J5SNE8	Endocytosis
611	A0A0J5PX96	Endocytosis
612	A0A0J5PE23	Endocytosis
613	A0A0J5PUU6	Endocytosis
614	A0A0J5STE2	Endocytosis
615	A0A0J5PLH0	Endocytosis
616	A0A0J5SQX6	Endocytosis
617	A0A0J5PJX4	Endocytosis
618	A0A0J5PZE6	Endocytosis
619	A0A0J5Q2D9	Endocytosis
620	A0A0J5Q6B9	Endocytosis
621	A0A0J5PXE0	Endocytosis
622	A0A0J5PUE8	Endocytosis
623	A0A0J5Q6C6	Endocytosis
624	A0A0J5PDK8	Endocytosis
625	A0A0J5Q3M4	Endocytosis
626	A0A0J5PVM3	Endocytosis
627	A0A0J5SUG3	Endocytosis
628	A0A0J5SGM6	Endocytosis
629	A0A0J5SGM6	Ether lipid metabolism
630	A0A0J5SGM6	Glycerophospholipid metabolism
631	A0A0J5Q0J9	Endocytosis
632	A0A0J5Q0J9	Ether lipid metabolism
633	A0A0J5Q0J9	Glycerophospholipid metabolism
634	A0A0J5PRS9	Endocytosis
635	A0A0J5PXJ8	Endocytosis
636	A0A0J5T0V8	Endocytosis
637	A0A0J5Q6F2	Endocytosis
638	A0A0J5Q6F2	MAPK signaling pathway - yeast
639	A0A0J5PRX3	Endocytosis
640	A0A0J5PEI8	Endocytosis
641	A0A0J5SI75	Endocytosis
642	A0A0J5SI75	Protein processing in endoplasmic reticulum
643	A0A0J5SI75	Spliceosome
644	A0A0J5PTE1	Endocytosis
645	A0A0J5PTE1	Protein processing in endoplasmic reticulum
646	A0A0J5PTE1	Spliceosome
647	A0A0J5Q009	Endocytosis
648	A0A0J5Q009	Ether lipid metabolism
649	A0A0J5Q009	Glycerophospholipid metabolism
650	A0A0J5PQ79	Endocytosis
651	A0A0J5PYH9	Endocytosis
652	A0A0J5PYH9	Inositol phosphate metabolism
653	A0A0J5PYH9	MAPK signaling pathway - yeast
654	A0A0J5PYH9	Mitophagy - yeast
655	A0A0J5PYH9	Phosphatidylinositol signaling system
656	A0A0J5SXG1	Endocytosis
657	A0A0J5SRS9	Endocytosis
658	A0A0J5PRE1	Endocytosis
659	A0A0J5PEV4	Endocytosis
660	A0A0J5PM23	Endocytosis
661	A0A0J5PLK9	Endocytosis
662	A0A0J5SQU7	Endocytosis
663	A0A0J5PQE7	Endocytosis
664	A0A0J5Q6Y8	Endocytosis
665	A0A0J5PR21	Endocytosis
666	A0A0J5STW1	Endocytosis
667	A0A0J5PIH3	Endocytosis
668	A0A0J5SES1	Endocytosis
669	A0A0J5PRE5	Endocytosis
670	A0A0J5PZU8	Endocytosis
671	A0A0J5PZU8	MAPK signaling pathway - yeast
672	A0A0J5PZU8	Ubiquitin mediated proteolysis
673	A0A0J5PPQ5	Ether lipid metabolism
674	A0A0J5PPQ5	Glycerophospholipid metabolism
675	A0A0J5PPQ5	Inositol phosphate metabolism
676	A0A0J5PVP1	Ether lipid metabolism
677	A0A0J5PVP1	Glycerophospholipid metabolism
678	A0A0J5PVP1	Phosphonate and phosphinate metabolism
679	A0A0J5PVP1	Ribosome
680	A0A0J5ST36	Fatty acid biosynthesis
681	A0A0J5Q2I5	Fatty acid biosynthesis
682	A0A0J5Q2I5	Propanoate metabolism
683	A0A0J5Q2I5	Pyruvate metabolism
684	A0A0J5PYS4	Fatty acid biosynthesis
685	A0A0J5PYS4	Fatty acid degradation
686	A0A0J5PYS4	Peroxisome
687	A0A0J5PW55	Fatty acid biosynthesis
688	A0A0J5PV46	Fatty acid biosynthesis
689	A0A0J5PV46	Fatty acid degradation
690	A0A0J5PV46	Peroxisome
691	A0A0J5PL51	Fatty acid degradation
692	A0A0J5PL51	Peroxisome
693	A0A0J5PL51	Valine, leucine and isoleucine degradation
694	A0A0J5PL51	alpha-Linolenic acid metabolism
695	A0A0J5PHV1	Fatty acid degradation
696	A0A0J5PHV1	Peroxisome
697	A0A0J5PHV1	Valine, leucine and isoleucine degradation
698	A0A0J5PHV1	alpha-Linolenic acid metabolism
699	A0A0J5SEC8	Fatty acid degradation
700	A0A0J5SEC8	Peroxisome
701	A0A0J5Q4C9	Fatty acid degradation
702	A0A0J5Q4C9	Glycolysis / Gluconeogenesis
703	A0A0J5Q4C9	Methane metabolism
704	A0A0J5Q4C9	Tyrosine metabolism
705	A0A0J5PI44	Fatty acid degradation
706	A0A0J5PI44	Glycolysis / Gluconeogenesis
707	A0A0J5PI44	Tyrosine metabolism
708	A0A0J5PKP6	Fatty acid degradation
709	A0A0J5PKP6	Glycolysis / Gluconeogenesis
710	A0A0J5PKP6	Tyrosine metabolism
711	A0A0J5PZV2	Fatty acid degradation
712	A0A0J5PZV2	Lysine degradation
713	A0A0J5PZV2	Tryptophan metabolism
714	A0A0J5SRZ5	Fatty acid degradation
715	A0A0J5SRZ5	Tryptophan metabolism
716	A0A0J5PHY4	Fatty acid degradation
717	A0A0J5PHY4	Peroxisome
718	A0A0J5PHY4	alpha-Linolenic acid metabolism
719	A0A0J5PHY4	Fatty acid degradation
720	A0A0J5PHY4	Peroxisome
721	A0A0J5PHY4	alpha-Linolenic acid metabolism
722	A0A0J5PIU1	Fatty acid degradation
723	A0A0J5PIU1	Propanoate metabolism
724	A0A0J5PIU1	Valine, leucine and isoleucine degradation
725	A0A0J5PIU1	beta-Alanine metabolism
726	A0A0J5PUN7	Fatty acid degradation
727	A0A0J5PUN7	Propanoate metabolism
728	A0A0J5PUN7	Valine, leucine and isoleucine degradation
729	A0A0J5PUN7	beta-Alanine metabolism
730	A0A0J5PHU0	Fatty acid elongation
731	A0A0J5Q1U7	Fatty acid elongation
732	A0A0J5SQV8	Fatty acid elongation
733	A0A0J5Q047	Fatty acid elongation
734	A0A0J5PPX0	Folate biosynthesis
735	A0A0J5PPX0	Thiamine metabolism
736	A0A0J5PQV6	Folate biosynthesis
737	A0A0J5PY21	Folate biosynthesis
738	A0A0J5SSD6	Folate biosynthesis
739	A0A0J5SWB3	Folate biosynthesis
740	A0A0J5SWB3	One carbon pool by folate
741	A0A0J5SSG4	Folate biosynthesis
742	A0A0J5PR25	Folate biosynthesis
743	A0A0J5Q128	Folate biosynthesis
744	A0A0J5Q128	Riboflavin metabolism
745	A0A0J5PYC3	Folate biosynthesis
746	A0A0J5PYC3	One carbon pool by folate
747	A0A0J5PGM5	Fructose and mannose metabolism
748	A0A0J5PGM5	Glycolysis / Gluconeogenesis
749	A0A0J5PGM5	Methane metabolism
750	A0A0J5PGM5	Pentose phosphate pathway
751	A0A0J5PWL0	Fructose and mannose metabolism
752	A0A0J5PWL0	Glycolysis / Gluconeogenesis
753	A0A0J5PWL0	Methane metabolism
754	A0A0J5PWL0	Pentose phosphate pathway
755	A0A0J5PU37	Fructose and mannose metabolism
756	A0A0J5PU37	Glycolysis / Gluconeogenesis
757	A0A0J5PU37	Methane metabolism
758	A0A0J5PU37	Pentose phosphate pathway
759	A0A0J5PHH6	Fructose and mannose metabolism
760	A0A0J5PT12	Fructose and mannose metabolism
761	A0A0J5PT12	Pentose and glucuronate interconversions
762	A0A0J5PIS5	Fructose and mannose metabolism
763	A0A0J5PIS5	Pentose and glucuronate interconversions
764	A0A0J5PZ82	Fructose and mannose metabolism
765	A0A0J5PSM2	Fructose and mannose metabolism
766	A0A0J5PSM2	Galactose metabolism
767	A0A0J5PSM2	Glycolysis / Gluconeogenesis
768	A0A0J5PSM2	Methane metabolism
769	A0A0J5PSM2	Pentose phosphate pathway
770	A0A0J5PSM2	RNA degradation
771	A0A0J5SVW5	Fructose and mannose metabolism
772	A0A0J5SVW5	Glycolysis / Gluconeogenesis
773	A0A0J5SVW5	Inositol phosphate metabolism
774	A0A0J5SYG5	Fructose and mannose metabolism
775	A0A0J5SYG5	Glycolysis / Gluconeogenesis
776	A0A0J5SYG5	Inositol phosphate metabolism
777	A0A0J5Q1D6	Fructose and mannose metabolism
778	A0A0J5Q1D6	Glycerolipid metabolism
779	A0A0J5Q1D6	Methane metabolism
780	A0A0J5PJH6	Fructose and mannose metabolism
781	A0A0J5PTJ9	Fructose and mannose metabolism
782	A0A0J5SGP0	Fructose and mannose metabolism
783	A0A0J5PFD9	Fructose and mannose metabolism
784	A0A0J5PY30	Fructose and mannose metabolism
785	A0A0J5PWB6	Fructose and mannose metabolism
786	A0A0J5T0S8	Fructose and mannose metabolism
787	A0A0J5SGB0	Fructose and mannose metabolism
788	A0A0J5PJ55	Fructose and mannose metabolism
789	A0A0J5PK24	Fructose and mannose metabolism
790	A0A0J5SX07	Galactose metabolism
791	A0A0J5SX07	Starch and sucrose metabolism
792	A0A0J5PTV0	Galactose metabolism
793	A0A0J5PTV0	Glycolysis / Gluconeogenesis
794	A0A0J5SYQ5	Galactose metabolism
795	A0A0J5SYQ5	Sphingolipid metabolism
796	A0A0J5PNV8	Galactose metabolism
797	A0A0J5PNV8	Glycerolipid metabolism
798	A0A0J5PNV8	Glycosphingolipid biosynthesis - globo and isoglobo series
799	A0A0J5PNV8	Sphingolipid metabolism
800	A0A0J5PK09	Galactose metabolism
801	A0A0J5PK09	Glycerolipid metabolism
802	A0A0J5PK09	Glycosphingolipid biosynthesis - globo and isoglobo series
803	A0A0J5PK09	Sphingolipid metabolism
804	A0A0J5PYP8	Galactose metabolism
805	A0A0J5PYP8	Glycolysis / Gluconeogenesis
806	A0A0J5PGU0	Galactose metabolism
807	A0A0J5PGU0	Sphingolipid metabolism
808	A0A0J5SD97	Galactose metabolism
809	A0A0J5SD97	Starch and sucrose metabolism
810	A0A0J5PR28	Galactose metabolism
811	A0A0J5PR28	Glycerolipid metabolism
812	A0A0J5PR28	Glycosphingolipid biosynthesis - globo and isoglobo series
813	A0A0J5PR28	Sphingolipid metabolism
814	A0A0J5PGE8	Galactose metabolism
815	A0A0J5PGE8	Starch and sucrose metabolism
816	A0A0J5Q5A8	Galactose metabolism
817	A0A0J5Q5A8	Sphingolipid metabolism
818	A0A0J5SGS9	Galactose metabolism
819	A0A0J5SGS9	Starch and sucrose metabolism
820	A0A0J5PN47	Galactose metabolism
821	A0A0J5PN47	Glycerolipid metabolism
822	A0A0J5PN47	Glycosphingolipid biosynthesis - globo and isoglobo series
823	A0A0J5PN47	Sphingolipid metabolism
824	A0A0J5PI42	Galactose metabolism
825	A0A0J5PI42	Glycerolipid metabolism
826	A0A0J5PI42	Glycosphingolipid biosynthesis - globo and isoglobo series
827	A0A0J5PI42	Sphingolipid metabolism
828	A0A0J5PGY5	Glutathione metabolism
829	A0A0J5PUX4	Glutathione metabolism
830	A0A0J5PDB4	Glutathione metabolism
831	A0A0J5PDB4	Purine metabolism
832	A0A0J5PDB4	Pyrimidine metabolism
833	A0A0J5Q4B0	Glutathione metabolism
834	A0A0J5Q5Q0	Glutathione metabolism
835	A0A0J5Q5Q0	Pentose phosphate pathway
836	A0A0J5PZ50	Glutathione metabolism
837	A0A0J5PZ50	Pentose phosphate pathway
838	A0A0J5Q025	Glutathione metabolism
839	A0A0J5PIA6	Glutathione metabolism
840	A0A0J5PII8	Glutathione metabolism
841	A0A0J5SRN8	Glutathione metabolism
842	A0A0J5Q1N6	Glutathione metabolism
843	A0A0J5PZ41	Glycerolipid metabolism
844	A0A0J5PZ41	Glycerophospholipid metabolism
845	A0A0J5PY40	Glycerolipid metabolism
846	A0A0J5PY40	Glycolysis / Gluconeogenesis
847	A0A0J5PY40	Pentose and glucuronate interconversions
848	A0A0J5PKW5	Glycerolipid metabolism
849	A0A0J5PXE8	Glycerolipid metabolism
850	A0A0J5PZK8	Glycerolipid metabolism
851	A0A0J5PYQ6	Glycerolipid metabolism
852	A0A0J5PHC4	Glycerolipid metabolism
853	A0A0J5PDE6	Glycerolipid metabolism
854	A0A0J5PGM8	Glycerolipid metabolism
855	A0A0J5PGM8	Glycerophospholipid metabolism
856	A0A0J5SLA2	Glycerolipid metabolism
857	A0A0J5SLA2	Glycine, serine and threonine metabolism
858	A0A0J5SLA2	Glyoxylate and dicarboxylate metabolism
859	A0A0J5PGN9	Glycerolipid metabolism
860	A0A0J5PH63	Glycerophospholipid metabolism
861	A0A0J5PH96	Glycerophospholipid metabolism
862	A0A0J5Q0Q6	Glycerophospholipid metabolism
863	A0A0J5Q0K6	Glycerophospholipid metabolism
864	A0A0J5PDH7	Glycerophospholipid metabolism
865	A0A0J5PDH7	Phosphonate and phosphinate metabolism
866	A0A0J5Q016	Glycerophospholipid metabolism
867	A0A0J5PPC6	Glycerophospholipid metabolism
868	A0A0J5PPC6	MAPK signaling pathway - yeast
869	A0A0J5PP12	Glycerophospholipid metabolism
870	A0A0J5Q6U9	Glycerophospholipid metabolism
871	A0A0J5PT72	Glycerophospholipid metabolism
872	A0A0J5PGD4	Glycerophospholipid metabolism
873	A0A0J5PIE6	Glycerophospholipid metabolism
874	A0A0J5SC01	Glycerophospholipid metabolism
875	A0A0J5PTJ6	Glycerophospholipid metabolism
876	A0A0J5PK23	Glycerophospholipid metabolism
877	A0A0J5PYK6	Glycine, serine and threonine metabolism
878	A0A0J5PYK6	Phenylalanine, tyrosine and tryptophan biosynthesis
879	A0A0J5PE32	Glycine, serine and threonine metabolism
880	A0A0J5PE32	Valine, leucine and isoleucine biosynthesis
881	A0A0J5SBZ4	Glycine, serine and threonine metabolism
882	A0A0J5SBZ4	Phenylalanine metabolism
883	A0A0J5SBZ4	Tyrosine metabolism
884	A0A0J5SBZ4	beta-Alanine metabolism
885	A0A0J5Q0U1	Glycine, serine and threonine metabolism
886	A0A0J5Q0U1	Glyoxylate and dicarboxylate metabolism
887	A0A0J5Q0U1	One carbon pool by folate
888	A0A0J5PFF5	Glycine, serine and threonine metabolism
889	A0A0J5PFF5	Methane metabolism
890	A0A0J5PFF5	Vitamin B6 metabolism
891	A0A0J5PUR2	Glycine, serine and threonine metabolism
892	A0A0J5PUR2	Glycolysis / Gluconeogenesis
893	A0A0J5PUR2	Methane metabolism
894	A0A0J5PUT4	Glycine, serine and threonine metabolism
895	A0A0J5PUT4	Vitamin B6 metabolism
896	A0A0J5PR58	Glycine, serine and threonine metabolism
897	A0A0J5PR58	Glyoxylate and dicarboxylate metabolism
898	A0A0J5PQN3	Glycine, serine and threonine metabolism
899	A0A0J5PQN3	Phenylalanine metabolism
900	A0A0J5PQN3	Tyrosine metabolism
901	A0A0J5PQN3	beta-Alanine metabolism
902	A0A0J5SP13	Glycine, serine and threonine metabolism
903	A0A0J5SP13	Methane metabolism
904	A0A0J5PW10	Glycine, serine and threonine metabolism
905	A0A0J5PW10	Glyoxylate and dicarboxylate metabolism
906	A0A0J5PRD0	Glycine, serine and threonine metabolism
907	A0A0J5PRD0	Methane metabolism
908	A0A0J5PVA3	Glycine, serine and threonine metabolism
909	A0A0J5PVQ1	Glycine, serine and threonine metabolism
910	A0A0J5PVQ1	Methane metabolism
911	A0A0J5SX50	Glycine, serine and threonine metabolism
912	A0A0J5SS80	Glycine, serine and threonine metabolism
913	A0A0J5PT44	Glycine, serine and threonine metabolism
914	A0A0J5PT44	Pyrimidine metabolism
915	A0A0J5PI27	Glycine, serine and threonine metabolism
916	A0A0J5PI27	Phenylalanine metabolism
917	A0A0J5PI27	Tyrosine metabolism
918	A0A0J5PI27	beta-Alanine metabolism
919	A0A0J5SPH0	Glycine, serine and threonine metabolism
920	A0A0J5SPH0	Phenylalanine metabolism
921	A0A0J5SPH0	Tyrosine metabolism
922	A0A0J5SPH0	beta-Alanine metabolism
923	A0A0J5PD89	Glycine, serine and threonine metabolism
924	A0A0J5PD89	Valine, leucine and isoleucine biosynthesis
925	A0A0J5SN57	Glycine, serine and threonine metabolism
926	A0A0J5SZV2	Glycine, serine and threonine metabolism
927	A0A0J5SZV2	Lysine degradation
928	A0A0J5SZV2	Peroxisome
929	A0A0J5PIU4	Glycine, serine and threonine metabolism
930	A0A0J5PIU4	Lysine degradation
931	A0A0J5PIU4	Peroxisome
932	A0A0J5PS33	Glycine, serine and threonine metabolism
933	A0A0J5SI65	Glycine, serine and threonine metabolism
934	A0A0J5SI65	Glycine, serine and threonine metabolism
935	A0A0J5Q2B9	Glycine, serine and threonine metabolism
936	A0A0J5Q217	Glycolysis / Gluconeogenesis
937	A0A0J5Q217	Methane metabolism
938	A0A0J5Q217	RNA degradation
939	A0A0J5PG18	Glycolysis / Gluconeogenesis
940	A0A0J5SRI8	Glycolysis / Gluconeogenesis
941	A0A0J5PFZ9	Glycolysis / Gluconeogenesis
942	A0A0J5SNF4	Glycolysis / Gluconeogenesis
943	A0A0J5PU96	Glycolysis / Gluconeogenesis
944	A0A0J5PHV6	Glycolysis / Gluconeogenesis
945	A0A0J5PHV6	Methane metabolism
946	A0A0J5PHV6	Propanoate metabolism
947	A0A0J5PHV6	Pyruvate metabolism
948	A0A0J5Q2C9	Glycolysis / Gluconeogenesis
949	A0A0J5Q2C9	Purine metabolism
950	A0A0J5Q2C9	Pyruvate metabolism
951	A0A0J5PWH3	Glycolysis / Gluconeogenesis
952	A0A0J5PFW6	Glycolysis / Gluconeogenesis
953	A0A0J5PFW6	Histidine metabolism
954	A0A0J5PFW6	Phenylalanine metabolism
955	A0A0J5PFW6	Tyrosine metabolism
956	A0A0J5PFW6	beta-Alanine metabolism
957	A0A0J5Q3P9	Glycosaminoglycan degradation
958	A0A0J5SEP1	Glyoxylate and dicarboxylate metabolism
959	A0A0J5PIY7	Glyoxylate and dicarboxylate metabolism
960	A0A0J5PDC4	Glyoxylate and dicarboxylate metabolism
961	A0A0J5PPI2	Glyoxylate and dicarboxylate metabolism
962	A0A0J5PPI2	MAPK signaling pathway - yeast
963	A0A0J5PPI2	Peroxisome
964	A0A0J5PPI2	Tryptophan metabolism
965	A0A0J5PWW6	Glyoxylate and dicarboxylate metabolism
966	A0A0J5PWW6	MAPK signaling pathway - yeast
967	A0A0J5PWW6	Peroxisome
968	A0A0J5PWW6	Tryptophan metabolism
969	A0A0J5PFG2	Glyoxylate and dicarboxylate metabolism
970	A0A0J5PFG2	Methane metabolism
971	A0A0J5SEH6	Glyoxylate and dicarboxylate metabolism
972	A0A0J5SEH6	Pyruvate metabolism
973	A0A0J5Q511	Glyoxylate and dicarboxylate metabolism
974	A0A0J5T075	Glyoxylate and dicarboxylate metabolism
975	A0A0J5T075	One carbon pool by folate
976	A0A0J5PFS8	Glyoxylate and dicarboxylate metabolism
977	A0A0J5PFS8	MAPK signaling pathway - yeast
978	A0A0J5PFS8	Peroxisome
979	A0A0J5PFS8	Tryptophan metabolism
980	A0A0J5PEU1	Glyoxylate and dicarboxylate metabolism
981	A0A0J5PRW7	Histidine metabolism
982	A0A0J5Q0S8	Histidine metabolism
983	A0A0J5Q0S8	Phenylalanine metabolism
984	A0A0J5Q0S8	Phenylalanine, tyrosine and tryptophan biosynthesis
985	A0A0J5Q0S8	Tyrosine metabolism
986	A0A0J5SL09	Histidine metabolism
987	A0A0J5PYK3	Histidine metabolism
988	A0A0J5PNQ3	Histidine metabolism
989	A0A0J5PL88	Histidine metabolism
990	A0A0J5SXJ3	Histidine metabolism
991	A0A0J5PDS9	Inositol phosphate metabolism
992	A0A0J5SWY9	Inositol phosphate metabolism
993	A0A0J5SG67	Inositol phosphate metabolism
994	A0A0J5SG67	MAPK signaling pathway - yeast
995	A0A0J5SG67	Phosphatidylinositol signaling system
996	A0A0J5Q1B5	Inositol phosphate metabolism
997	A0A0J5Q1B5	Phosphatidylinositol signaling system
998	A0A0J5Q041	Inositol phosphate metabolism
999	A0A0J5Q041	Phosphatidylinositol signaling system
1000	A0A0J5SCN9	Inositol phosphate metabolism
1001	A0A0J5SCN9	Phosphatidylinositol signaling system
1002	A0A0J5SFW5	Inositol phosphate metabolism
1003	A0A0J5Q3J3	Inositol phosphate metabolism
1004	A0A0J5PSA4	Inositol phosphate metabolism
1005	A0A0J5PSA4	Phosphatidylinositol signaling system
1006	A0A0J5Q4V7	Inositol phosphate metabolism
1007	A0A0J5Q4V7	Propanoate metabolism
1008	A0A0J5Q4V7	Valine, leucine and isoleucine degradation
1009	A0A0J5Q4V7	beta-Alanine metabolism
1010	A0A0J5PEV2	Inositol phosphate metabolism
1011	A0A0J5PY15	Linoleic acid metabolism
1012	A0A0J5PGJ6	Linoleic acid metabolism
1013	A0A0J5PYB7	Lipoic acid metabolism
1014	A0A0J5SSP4	Lipoic acid metabolism
1015	A0A0J5PEL4	Lysine biosynthesis
1016	A0A0J5PEL4	Lysine degradation
1017	A0A0J5Q6J2	Lysine biosynthesis
1018	A0A0J5PP93	Lysine biosynthesis
1019	A0A0J5SDC1	Lysine biosynthesis
1020	A0A0J5SDC1	Pyruvate metabolism
1021	A0A0J5PW60	Lysine biosynthesis
1022	A0A0J5PEK7	Lysine biosynthesis
1023	A0A0J5PY62	Lysine biosynthesis
1024	A0A0J5PY62	Lysine degradation
1025	A0A0J5PPG1	Lysine degradation
1026	A0A0J5PPG1	Proteasome
1027	A0A0J5SP43	MAPK signaling pathway - yeast
1028	A0A0J5Q6P9	MAPK signaling pathway - yeast
1029	A0A0J5Q6E5	MAPK signaling pathway - yeast
1030	A0A0J5PMP0	MAPK signaling pathway - yeast
1031	A0A0J5SDI8	MAPK signaling pathway - yeast
1032	A0A0J5PVX2	MAPK signaling pathway - yeast
1033	A0A0J5PVX2	RNA transport
1034	A0A0J5PKX5	MAPK signaling pathway - yeast
1035	A0A0J5PKX5	Mitophagy - yeast
1036	A0A0J5PFA7	MAPK signaling pathway - yeast
1037	A0A0J5PZT8	MAPK signaling pathway - yeast
1038	A0A0J5PZ40	MAPK signaling pathway - yeast
1039	A0A0J5Q6X9	MAPK signaling pathway - yeast
1040	A0A0J5Q6X9	Starch and sucrose metabolism
1041	A0A0J5Q4D9	MAPK signaling pathway - yeast
1042	A0A0J5Q1K1	MAPK signaling pathway - yeast
1043	A0A0J5Q3D4	MAPK signaling pathway - yeast
1044	A0A0J5Q231	MAPK signaling pathway - yeast
1045	A0A0J5PNI5	MAPK signaling pathway - yeast
1046	A0A0J5PS38	MAPK signaling pathway - yeast
1047	A0A0J5PW23	MAPK signaling pathway - yeast
1048	A0A0J5PHQ4	MAPK signaling pathway - yeast
1049	A0A0J5PNP2	MAPK signaling pathway - yeast
1050	A0A0J5PRK9	MAPK signaling pathway - yeast
1051	A0A0J5PW27	MAPK signaling pathway - yeast
1052	A0A0J5PJE5	MAPK signaling pathway - yeast
1053	A0A0J5PFC9	MAPK signaling pathway - yeast
1054	A0A0J5PX97	Mannose type O-glycan biosynthesis
1055	A0A0J5PZQ6	Mannose type O-glycan biosynthesis
1056	A0A0J5PN63	Mannose type O-glycan biosynthesis
1057	A0A0J5PWG9	Methane metabolism
1058	A0A0J5PEF9	Mitophagy - yeast
1059	A0A0J5PEF9	Spliceosome
1060	A0A0J5PN26	Mitophagy - yeast
1061	A0A0J5PN26	Ribosome biogenesis in eukaryotes
1062	A0A0J5PNF7	Mitophagy - yeast
1063	A0A0J5PHZ5	Mitophagy - yeast
1064	A0A0J5Q1B9	Mitophagy - yeast
1065	A0A0J5PQM1	Mitophagy - yeast
1066	A0A0J5PJ05	Mitophagy - yeast
1067	A0A0J5Q133	Mitophagy - yeast
1068	A0A0J5Q133	Ribosome biogenesis in eukaryotes
1069	A0A0J5SIT7	Mitophagy - yeast
1070	A0A0J5PYD5	Monobactam biosynthesis
1071	A0A0J5PYD5	Purine metabolism
1072	A0A0J5PYD5	Selenocompound metabolism
1073	A0A0J5PYD5	Sulfur metabolism
1074	A0A0J5SNS9	N-Glycan biosynthesis
1075	A0A0J5SNS9	Protein processing in endoplasmic reticulum
1076	A0A0J5Q252	N-Glycan biosynthesis
1077	A0A0J5Q252	Protein processing in endoplasmic reticulum
1078	A0A0J5Q252	Various types of N-glycan biosynthesis
1079	A0A0J5PJA7	N-Glycan biosynthesis
1080	A0A0J5PJA7	Protein processing in endoplasmic reticulum
1081	A0A0J5PND4	N-Glycan biosynthesis
1082	A0A0J5PND4	Protein processing in endoplasmic reticulum
1083	A0A0J5Q0B1	N-Glycan biosynthesis
1084	A0A0J5SEB3	N-Glycan biosynthesis
1085	A0A0J5SEB3	Protein processing in endoplasmic reticulum
1086	A0A0J5Q0N8	N-Glycan biosynthesis
1087	A0A0J5Q0N8	Protein processing in endoplasmic reticulum
1088	A0A0J5Q0N8	Various types of N-glycan biosynthesis
1089	A0A0J5PDT2	N-Glycan biosynthesis
1090	A0A0J5PDT2	Protein processing in endoplasmic reticulum
1091	A0A0J5PSI0	N-Glycan biosynthesis
1092	A0A0J5PSI0	Protein processing in endoplasmic reticulum
1093	A0A0J5Q1G3	N-Glycan biosynthesis
1094	A0A0J5PUM2	N-Glycan biosynthesis
1095	A0A0J5PNZ1	Nicotinate and nicotinamide metabolism
1096	A0A0J5PF99	Nicotinate and nicotinamide metabolism
1097	A0A0J5PF99	Purine metabolism
1098	A0A0J5PF99	Pyrimidine metabolism
1099	A0A0J5SNR7	Nicotinate and nicotinamide metabolism
1100	A0A0J5PHR6	Nicotinate and nicotinamide metabolism
1101	A0A0J5Q2T7	Nicotinate and nicotinamide metabolism
1102	A0A0J5PRC9	Nicotinate and nicotinamide metabolism
1103	A0A0J5PRC9	Peroxisome
1104	A0A0J5PGS1	Nicotinate and nicotinamide metabolism
1105	A0A0J5PQR6	Nicotinate and nicotinamide metabolism
1106	A0A0J5PVP5	Nicotinate and nicotinamide metabolism
1107	A0A0J5PLB7	Nicotinate and nicotinamide metabolism
1108	A0A0J5PLB7	Pyrimidine metabolism
1109	A0A0J5PHX1	Nitrogen metabolism
1110	A0A0J5PIT7	Nitrogen metabolism
1111	A0A0J5SUB2	Nitrogen metabolism
1112	A0A0J5PJX9	Nitrogen metabolism
1113	A0A0J5Q1W4	Nitrogen metabolism
1114	A0A0J5SHU9	One carbon pool by folate
1115	A0A0J5SVU5	One carbon pool by folate
1116	A0A0J5PYL3	One carbon pool by folate
1117	A0A0J5PYL3	Purine metabolism
1118	A0A0J5PNM5	One carbon pool by folate
1119	A0A0J5PNM5	Pyrimidine metabolism
1120	A0A0J5SS29	One carbon pool by folate
1121	A0A0J5PUW0	One carbon pool by folate
1122	A0A0J5SCL0	One carbon pool by folate
1123	A0A0J5SCL0	Purine metabolism
1124	A0A0J5PHX5	One carbon pool by folate
1125	A0A0J5PLU5	Oxidative phosphorylation
1126	A0A0J5PQL3	Oxidative phosphorylation
1127	A0A0J5SNT3	Oxidative phosphorylation
1128	A0A0J5Q3A9	Oxidative phosphorylation
1129	A0A0J5PLX2	Oxidative phosphorylation
1130	A0A0J5PHT1	Oxidative phosphorylation
1131	A0A0J5PV72	Oxidative phosphorylation
1132	A0A0J5PTK0	Oxidative phosphorylation
1133	A0A0J5PZ17	Oxidative phosphorylation
1134	A0A0J5PKY8	Oxidative phosphorylation
1135	A0A0J5SIY5	Oxidative phosphorylation
1136	A0A0J5PM61	Oxidative phosphorylation
1137	A0A0J5SV86	Oxidative phosphorylation
1138	A0A0J5PFU8	Oxidative phosphorylation
1139	A0A0J5PGE4	Oxidative phosphorylation
1140	A0A0J5PJR5	Oxidative phosphorylation
1141	A0A0J5SNI5	Oxidative phosphorylation
1142	A0A0J5PHX6	Oxidative phosphorylation
1143	A0A0J5PIP9	Oxidative phosphorylation
1144	A0A0J5PEM4	Oxidative phosphorylation
1145	A0A0J5Q0V2	Oxidative phosphorylation
1146	A0A0J5SW82	Oxidative phosphorylation
1147	A0A0J5SDI5	Oxidative phosphorylation
1148	A0A0J5PWD0	Oxidative phosphorylation
1149	A0A0J5Q470	Oxidative phosphorylation
1150	A0A0J5SBV4	Oxidative phosphorylation
1151	A0A0J5SHU1	Oxidative phosphorylation
1152	A0A0J5Q6Y9	Oxidative phosphorylation
1153	A0A0J5PFZ8	Oxidative phosphorylation
1154	A0A0J5PZJ9	Oxidative phosphorylation
1155	A0A0J5PQK8	Oxidative phosphorylation
1156	A0A0J5PR24	Oxidative phosphorylation
1157	A0A0J5PVL4	Oxidative phosphorylation
1158	A0A0J5PHQ6	Oxidative phosphorylation
1159	A0A0J5PVZ4	Oxidative phosphorylation
1160	A0A0J5Q705	Oxidative phosphorylation
1161	A0A0J5PSQ5	Oxidative phosphorylation
1162	A0A0J5PYD1	Oxidative phosphorylation
1163	A0A0J5Q2V6	Oxidative phosphorylation
1164	A0A0J5PSR3	Oxidative phosphorylation
1165	A0A0J5PPW1	Oxidative phosphorylation
1166	A0A0J5SNY8	Oxidative phosphorylation
1167	A0A0J5PRL0	Oxidative phosphorylation
1168	A0A0J5PR78	Oxidative phosphorylation
1169	A0A0J5PZ87	Oxidative phosphorylation
1170	A0A0J5PV62	Oxidative phosphorylation
1171	A0A0J5PUB0	Oxidative phosphorylation
1172	A0A0J5PDC0	Oxidative phosphorylation
1173	A0A0J5PY66	Oxidative phosphorylation
1174	A0A0J5PWJ2	Oxidative phosphorylation
1175	A0A0J5Q0M2	Pantothenate and CoA biosynthesis
1176	A0A0J5Q0M2	Valine, leucine and isoleucine biosynthesis
1177	A0A0J5SV38	Pantothenate and CoA biosynthesis
1178	A0A0J5SV38	Valine, leucine and isoleucine biosynthesis
1179	A0A0J5PWS8	Pantothenate and CoA biosynthesis
1180	A0A0J5PWS8	beta-Alanine metabolism
1181	A0A0J5PQ44	Pantothenate and CoA biosynthesis
1182	A0A0J5PQ44	Valine, leucine and isoleucine biosynthesis
1183	A0A0J5SBW0	Pantothenate and CoA biosynthesis
1184	A0A0J5SBW0	Valine, leucine and isoleucine biosynthesis
1185	A0A0J5PJ19	Pantothenate and CoA biosynthesis
1186	A0A0J5PWQ8	Penicillin and cephalosporin biosynthesis
1187	A0A0J5PY18	Pentose and glucuronate interconversions
1188	A0A0J5Q021	Pentose and glucuronate interconversions
1189	A0A0J5PY47	Pentose and glucuronate interconversions
1190	A0A0J5PY47	Pentose phosphate pathway
1191	A0A0J5PL15	Pentose and glucuronate interconversions
1192	A0A0J5Q2A5	Pentose and glucuronate interconversions
1193	A0A0J5PK74	Pentose and glucuronate interconversions
1194	A0A0J5PMF3	Pentose and glucuronate interconversions
1195	A0A0J5PF60	Pentose and glucuronate interconversions
1196	A0A0J5PJM2	Pentose and glucuronate interconversions
1197	A0A0J5PU61	Pentose and glucuronate interconversions
1198	A0A0J5SXL4	Pentose and glucuronate interconversions
1199	A0A0J5PJW0	Pentose and glucuronate interconversions
1200	A0A0J5PPW2	Pentose and glucuronate interconversions
1201	A0A0J5SQ22	Pentose and glucuronate interconversions
1202	A0A0J5PLR9	Pentose and glucuronate interconversions
1203	A0A0J5PJ79	Pentose and glucuronate interconversions
1204	A0A0J5PM40	Pentose and glucuronate interconversions
1205	A0A0J5Q7C1	Pentose and glucuronate interconversions
1206	A0A0J5SRC6	Pentose and glucuronate interconversions
1207	A0A0J5PLY5	Pentose phosphate pathway
1208	A0A0J5Q103	Pentose phosphate pathway
1209	A0A0J5PZN6	Pentose phosphate pathway
1210	A0A0J5SPW8	Pentose phosphate pathway
1211	A0A0J5PGT2	Pentose phosphate pathway
1212	A0A0J5PGT2	Pentose phosphate pathway
1213	A0A0J5SDE5	Pentose phosphate pathway
1214	A0A0J5SDE5	Purine metabolism
1215	A0A0J5Q7F5	Pentose phosphate pathway
1216	A0A0J5PTP1	Pentose phosphate pathway
1217	A0A0J5PTP1	Purine metabolism
1218	A0A0J5SNJ8	Pentose phosphate pathway
1219	A0A0J5PLS2	Peroxisome
1220	A0A0J5Q3T6	Peroxisome
1221	A0A0J5Q6Y5	Peroxisome
1222	A0A0J5ST99	Peroxisome
1223	A0A0J5PGI9	Peroxisome
1224	A0A0J5PUY7	Peroxisome
1225	A0A0J5PI00	Peroxisome
1226	A0A0J5PYQ0	Peroxisome
1227	A0A0J5PSK0	Peroxisome
1228	A0A0J5PYT4	Peroxisome
1229	A0A0J5PYQ9	Peroxisome
1230	A0A0J5PXW8	Peroxisome
1231	A0A0J5SPH8	Peroxisome
1232	A0A0J5PMY4	Peroxisome
1233	A0A0J5PUD0	Peroxisome
1234	A0A0J5PF02	Peroxisome
1235	A0A0J5PH37	Peroxisome
1236	A0A0J5SCL7	Peroxisome
1237	A0A0J5SCL7	Terpenoid backbone biosynthesis
1238	A0A0J5Q2G8	Phenylalanine metabolism
1239	A0A0J5PPI7	Phenylalanine metabolism
1240	A0A0J5PPI7	Tryptophan metabolism
1241	A0A0J5PPI7	Tyrosine metabolism
1242	A0A0J5PUE5	Phenylalanine metabolism
1243	A0A0J5SIH2	Phenylalanine metabolism
1244	A0A0J5SIH2	Tryptophan metabolism
1245	A0A0J5SXY9	Phenylalanine metabolism
1246	A0A0J5SXY9	Ubiquinone and other terpenoid-quinone biosynthesis
1247	A0A0J5PRA4	Phenylalanine metabolism
1248	A0A0J5PRA4	Tyrosine metabolism
1249	A0A0J5PRA4	Ubiquinone and other terpenoid-quinone biosynthesis
1250	A0A0J5PGJ3	Phenylalanine, tyrosine and tryptophan biosynthesis
1251	A0A0J5PGJ3	Phenylalanine, tyrosine and tryptophan biosynthesis
1252	A0A0J5PKC8	Phenylalanine, tyrosine and tryptophan biosynthesis
1253	A0A0J5Q5E1	Phenylalanine, tyrosine and tryptophan biosynthesis
1254	A0A0J5Q1H9	Phenylalanine, tyrosine and tryptophan biosynthesis
1255	A0A0J5PRP9	Phenylalanine, tyrosine and tryptophan biosynthesis
1256	A0A0J5PQH0	Phenylalanine, tyrosine and tryptophan biosynthesis
1257	A0A0J5PRK7	Phenylalanine, tyrosine and tryptophan biosynthesis
1258	A0A0J5PDT9	Phenylalanine, tyrosine and tryptophan biosynthesis
1259	A0A0J5PI29	Phenylalanine, tyrosine and tryptophan biosynthesis
1260	A0A0J5SG89	Phenylalanine, tyrosine and tryptophan biosynthesis
1261	A0A0J5Q3S1	Phenylalanine, tyrosine and tryptophan biosynthesis
1262	A0A0J5Q244	Phenylalanine, tyrosine and tryptophan biosynthesis
1263	A0A0J5SD58	Phosphatidylinositol signaling system
1264	A0A0J5SUJ6	Porphyrin and chlorophyll metabolism
1265	A0A0J5SGN3	Porphyrin and chlorophyll metabolism
1266	A0A0J5PRE6	Porphyrin and chlorophyll metabolism
1267	A0A0J5PWW3	Porphyrin and chlorophyll metabolism
1268	A0A0J5SDC4	Porphyrin and chlorophyll metabolism
1269	A0A0J5Q2Q4	Porphyrin and chlorophyll metabolism
1270	A0A0J5PS96	Porphyrin and chlorophyll metabolism
1271	A0A0J5PVY3	Porphyrin and chlorophyll metabolism
1272	A0A0J5SQR3	Porphyrin and chlorophyll metabolism
1273	A0A0J5PLI1	Porphyrin and chlorophyll metabolism
1274	A0A0J5Q4L5	Propanoate metabolism
1275	A0A0J5Q4L5	Valine, leucine and isoleucine degradation
1276	A0A0J5Q4L5	beta-Alanine metabolism
1277	A0A0J5PTT9	Propanoate metabolism
1278	A0A0J5PTT9	Valine, leucine and isoleucine degradation
1279	A0A0J5Q2S0	Propanoate metabolism
1280	A0A0J5Q2R3	Propanoate metabolism
1281	A0A0J5Q2R3	Valine, leucine and isoleucine degradation
1282	A0A0J5PFU7	Propanoate metabolism
1283	A0A0J5SDM3	Propanoate metabolism
1284	A0A0J5SDM3	Valine, leucine and isoleucine degradation
1285	A0A0J5SDM3	Propanoate metabolism
1286	A0A0J5SDM3	Valine, leucine and isoleucine degradation
1287	A0A0J5PI70	Proteasome
1288	A0A0J5Q690	Proteasome
1289	A0A0J5SYY7	Proteasome
1290	A0A0J5SPE7	Proteasome
1291	A0A0J5PT48	Proteasome
1292	A0A0J5PTR8	Proteasome
1293	A0A0J5Q1X8	Proteasome
1294	A0A0J5PYA5	Proteasome
1295	A0A0J5PXN2	Proteasome
1296	A0A0J5PL25	Proteasome
1297	A0A0J5PNJ4	Proteasome
1298	A0A0J5PDW8	Proteasome
1299	A0A0J5PH65	Proteasome
1300	A0A0J5Q2W2	Proteasome
1301	A0A0J5PXZ9	Proteasome
1302	A0A0J5PEL1	Proteasome
1303	A0A0J5Q2N5	Proteasome
1304	A0A0J5PHE4	Proteasome
1305	A0A0J5PX13	Proteasome
1306	A0A0J5PTD3	Proteasome
1307	A0A0J5PMJ3	Proteasome
1308	A0A0J5PFK7	Proteasome
1309	A0A0J5Q3V2	Proteasome
1310	A0A0J5SSU4	Proteasome
1311	A0A0J5Q6M9	Proteasome
1312	A0A0J5PVE5	Proteasome
1313	A0A0J5Q214	Proteasome
1314	A0A0J5Q1V9	Proteasome
1315	A0A0J5PLK7	Proteasome
1316	A0A0J5Q2T5	Protein export
1317	A0A0J5SNV5	Protein export
1318	A0A0J5PFK5	Protein export
1319	A0A0J5PUX5	Protein export
1320	A0A0J5PYS9	Protein export
1321	A0A0J5PYS9	Protein processing in endoplasmic reticulum
1322	A0A0J5PGC9	Protein export
1323	A0A0J5SFL8	Protein export
1324	A0A0J5SFL8	Protein processing in endoplasmic reticulum
1325	A0A0J5PQ17	Protein export
1326	A0A0J5PTY1	Protein export
1327	A0A0J5PMH5	Protein export
1328	A0A0J5PMH5	Protein processing in endoplasmic reticulum
1329	A0A0J5Q3V7	Protein processing in endoplasmic reticulum
1330	A0A0J5SG93	Protein processing in endoplasmic reticulum
1331	A0A0J5SJT8	Protein processing in endoplasmic reticulum
1332	A0A0J5SPP9	Protein processing in endoplasmic reticulum
1333	A0A0J5PQ55	Protein processing in endoplasmic reticulum
1334	A0A0J5PRH2	Protein processing in endoplasmic reticulum
1335	A0A0J5PRH2	Nucleotide excision repair
1336	A0A0J5PKD6	Protein processing in endoplasmic reticulum
1337	A0A0J5Q031	Protein processing in endoplasmic reticulum
1338	A0A0J5PYK2	Protein processing in endoplasmic reticulum
1339	A0A0J5Q2X5	Protein processing in endoplasmic reticulum
1340	A0A0J5SC73	Protein processing in endoplasmic reticulum
1341	A0A0J5SC73	RNA transport
1342	A0A0J5PJ97	Protein processing in endoplasmic reticulum
1343	A0A0J5Q854	Protein processing in endoplasmic reticulum
1344	A0A0J5PPV5	Protein processing in endoplasmic reticulum
1345	A0A0J5PYW0	Protein processing in endoplasmic reticulum
1346	A0A0J5Q1Z3	Protein processing in endoplasmic reticulum
1347	A0A0J5Q1Z3	Ubiquitin mediated proteolysis
1348	A0A0J5PIN2	Protein processing in endoplasmic reticulum
1349	A0A0J5PDH8	Protein processing in endoplasmic reticulum
1350	A0A0J5PDH8	Ubiquitin mediated proteolysis
1351	A0A0J5PX72	Protein processing in endoplasmic reticulum
1352	A0A0J5PRV8	Protein processing in endoplasmic reticulum
1353	A0A0J5PRV8	Ubiquitin mediated proteolysis
1354	A0A0J5PRV8	Ubiquitin mediated proteolysis
1355	A0A0J5PYQ7	Protein processing in endoplasmic reticulum
1356	A0A0J5SJW5	Protein processing in endoplasmic reticulum
1357	A0A0J5PDU0	Protein processing in endoplasmic reticulum
1358	A0A0J5PRK0	Protein processing in endoplasmic reticulum
1359	A0A0J5PW28	Protein processing in endoplasmic reticulum
1360	A0A0J5PXA9	Protein processing in endoplasmic reticulum
1361	A0A0J5PRR1	Protein processing in endoplasmic reticulum
1362	A0A0J5PX49	Protein processing in endoplasmic reticulum
1363	A0A0J5PXH1	Protein processing in endoplasmic reticulum
1364	A0A0J5PKT4	Protein processing in endoplasmic reticulum
1365	A0A0J5SWG1	Protein processing in endoplasmic reticulum
1366	A0A0J5Q3G5	Protein processing in endoplasmic reticulum
1367	A0A0J5PNM2	Protein processing in endoplasmic reticulum
1368	A0A0J5Q170	Protein processing in endoplasmic reticulum
1369	A0A0J5Q170	Ubiquitin mediated proteolysis
1370	A0A0J5PJ22	Protein processing in endoplasmic reticulum
1371	A0A0J5Q4N8	Protein processing in endoplasmic reticulum
1372	A0A0J5Q3N5	Protein processing in endoplasmic reticulum
1373	A0A0J5PRE9	Protein processing in endoplasmic reticulum
1374	A0A0J5Q0M5	Purine metabolism
1375	A0A0J5Q0M5	Pyrimidine metabolism
1376	A0A0J5Q0M5	RNA polymerase
1377	A0A0J5Q544	Purine metabolism
1378	A0A0J5Q544	Pyrimidine metabolism
1379	A0A0J5Q544	RNA polymerase
1380	A0A0J5SG11	Purine metabolism
1381	A0A0J5SG11	Pyrimidine metabolism
1382	A0A0J5SG11	RNA polymerase
1383	A0A0J5PV22	Purine metabolism
1384	A0A0J5PV22	Pyrimidine metabolism
1385	A0A0J5PV22	RNA polymerase
1386	A0A0J5PR61	Purine metabolism
1387	A0A0J5PR61	Pyrimidine metabolism
1388	A0A0J5PR61	RNA polymerase
1389	A0A0J5PY00	Purine metabolism
1390	A0A0J5PY00	Pyrimidine metabolism
1391	A0A0J5PY00	RNA polymerase
1392	A0A0J5PLR7	Purine metabolism
1393	A0A0J5PLR7	Pyrimidine metabolism
1394	A0A0J5PLR7	RNA polymerase
1395	A0A0J5PJ56	Purine metabolism
1396	A0A0J5PJ56	Pyrimidine metabolism
1397	A0A0J5PJ56	RNA polymerase
1398	A0A0J5PRY4	Purine metabolism
1399	A0A0J5PHD3	Purine metabolism
1400	A0A0J5PHD3	Pyrimidine metabolism
1401	A0A0J5PHD3	RNA polymerase
1402	A0A0J5PYL8	Purine metabolism
1403	A0A0J5PYL8	Pyrimidine metabolism
1404	A0A0J5PYL8	RNA polymerase
1405	A0A0J5PHH0	Purine metabolism
1406	A0A0J5PHH0	Pyrimidine metabolism
1407	A0A0J5PHH0	RNA polymerase
1408	A0A0J5SZD0	Purine metabolism
1409	A0A0J5SZD0	Pyrimidine metabolism
1410	A0A0J5SZD0	RNA polymerase
1411	A0A0J5PVT5	Purine metabolism
1412	A0A0J5PQZ1	Purine metabolism
1413	A0A0J5PQZ1	Pyrimidine metabolism
1414	A0A0J5Q378	Purine metabolism
1415	A0A0J5SXH8	Purine metabolism
1416	A0A0J5PFB8	Purine metabolism
1417	A0A0J5PQ18	Purine metabolism
1418	A0A0J5PZH7	Purine metabolism
1419	A0A0J5PZH7	Sulfur metabolism
1420	A0A0J5SC31	Purine metabolism
1421	A0A0J5PHA4	Purine metabolism
1422	A0A0J5SVR8	Purine metabolism
1423	A0A0J5PWV3	Purine metabolism
1424	A0A0J5PRD4	Purine metabolism
1425	A0A0J5PQJ9	Purine metabolism
1426	A0A0J5Q839	Purine metabolism
1427	A0A0J5PTV8	Purine metabolism
1428	A0A0J5PVZ5	Purine metabolism
1429	A0A0J5SRX7	Purine metabolism
1430	A0A0J5SRX7	Pyrimidine metabolism
1431	A0A0J5SRX7	DNA replication
1432	A0A0J5SRX7	Nucleotide excision repair
1433	A0A0J5PE20	Purine metabolism
1434	A0A0J5PE20	Pyrimidine metabolism
1435	A0A0J5PE20	DNA replication
1436	A0A0J5PE20	Homologous recombination
1437	A0A0J5PE20	Mismatch repair
1438	A0A0J5PE20	Nucleotide excision repair
1439	A0A0J5Q4M9	Purine metabolism
1440	A0A0J5Q4M9	Pyrimidine metabolism
1441	A0A0J5Q4M9	DNA replication
1442	A0A0J5PLV2	Purine metabolism
1443	A0A0J5PLV2	Pyrimidine metabolism
1444	A0A0J5PLV2	DNA replication
1445	A0A0J5Q4M2	Purine metabolism
1446	A0A0J5SIA1	Purine metabolism
1447	A0A0J5PLW5	Purine metabolism
1448	A0A0J5PTW5	Purine metabolism
1449	A0A0J5SJP5	Purine metabolism
1450	A0A0J5SJP5	Thiamine metabolism
1451	A0A0J5SQQ8	Purine metabolism
1452	A0A0J5SQQ8	Thiamine metabolism
1453	A0A0J5PLU3	Purine metabolism
1454	A0A0J5PLF5	Pyrimidine metabolism
1455	A0A0J5PRN1	Pyrimidine metabolism
1456	A0A0J5PZ31	Pyrimidine metabolism
1457	A0A0J5SNS5	Pyrimidine metabolism
1458	A0A0J5PMR5	Pyrimidine metabolism
1459	A0A0J5PDB8	Pyrimidine metabolism
1460	A0A0J5PM88	Pyrimidine metabolism
1461	A0A0J5PXW3	Pyrimidine metabolism
1462	A0A0J5PRM9	Pyrimidine metabolism
1463	A0A0J5PZQ1	Pyrimidine metabolism
1464	A0A0J5PZ55	Pyrimidine metabolism
1465	A0A0J5PNA6	Pyrimidine metabolism
1466	A0A0J5PL42	Pyrimidine metabolism
1467	A0A0J5SEQ2	Pyruvate metabolism
1468	A0A0J5PR37	Pyruvate metabolism
1469	A0A0J5PLN6	Pyruvate metabolism
1470	A0A0J5PJ26	Pyruvate metabolism
1471	A0A0J5PJ26	Valine, leucine and isoleucine biosynthesis
1472	A0A0J5Q5P1	Pyruvate metabolism
1473	A0A0J5Q3Y0	Pyruvate metabolism
1474	A0A0J5PWA2	Pyruvate metabolism
1475	A0A0J5Q4M0	Pyruvate metabolism
1476	A0A0J5PFF4	Pyruvate metabolism
1477	A0A0J5PY14	Pyruvate metabolism
1478	A0A0J5PN98	Pyruvate metabolism
1479	A0A0J5PST0	RNA degradation
1480	A0A0J5Q215	RNA degradation
1481	A0A0J5SDP2	RNA degradation
1482	A0A0J5PYP6	RNA degradation
1483	A0A0J5PVR2	RNA degradation
1484	A0A0J5Q1I6	RNA degradation
1485	A0A0J5Q2W4	RNA degradation
1486	A0A0J5PUS6	RNA degradation
1487	A0A0J5PUS6	Ribosome biogenesis in eukaryotes
1488	A0A0J5PJE1	RNA degradation
1489	A0A0J5Q288	RNA degradation
1490	A0A0J5SUQ0	RNA degradation
1491	A0A0J5SUQ0	Spliceosome
1492	A0A0J5SUQ0	Spliceosome
1493	A0A0J5PXJ4	RNA degradation
1494	A0A0J5PXJ4	Spliceosome
1495	A0A0J5SS19	RNA degradation
1496	A0A0J5Q441	RNA degradation
1497	A0A0J5Q441	Ribosome biogenesis in eukaryotes
1498	A0A0J5Q023	RNA degradation
1499	A0A0J5SX98	RNA degradation
1500	A0A0J5Q0K4	RNA degradation
1501	A0A0J5PNU3	RNA degradation
1502	A0A0J5PNU3	RNA transport
1503	A0A0J5PNU3	mRNA surveillance pathway
1504	A0A0J5Q366	RNA degradation
1505	A0A0J5Q3Q8	RNA degradation
1506	A0A0J5Q176	RNA degradation
1507	A0A0J5Q176	Spliceosome
1508	A0A0J5SKW5	RNA degradation
1509	A0A0J5PF93	RNA degradation
1510	A0A0J5PGQ6	RNA degradation
1511	A0A0J5SW34	RNA degradation
1512	A0A0J5Q3T7	RNA degradation
1513	A0A0J5PS68	RNA degradation
1514	A0A0J5PN45	RNA degradation
1515	A0A0J5PYP1	RNA degradation
1516	A0A0J5PZ44	RNA degradation
1517	A0A0J5Q0R0	RNA degradation
1518	A0A0J5Q0R0	Spliceosome
1519	A0A0J5Q3G2	RNA transport
1520	A0A0J5Q3G2	mRNA surveillance pathway
1521	A0A0J5PMV4	RNA transport
1522	A0A0J5PI48	RNA transport
1523	A0A0J5SU18	RNA transport
1524	A0A0J5Q395	RNA transport
1525	A0A0J5Q2H3	RNA transport
1526	A0A0J5PSE0	RNA transport
1527	A0A0J5PZL9	RNA transport
1528	A0A0J5STK6	RNA transport
1529	A0A0J5PX76	RNA transport
1530	A0A0J5PX76	Ribosome biogenesis in eukaryotes
1531	A0A0J5PPY9	RNA transport
1532	A0A0J5PGW0	RNA transport
1533	A0A0J5SER2	RNA transport
1534	A0A0J5SER2	Spliceosome
1535	A0A0J5SER2	mRNA surveillance pathway
1536	A0A0J5PTT8	RNA transport
1537	A0A0J5PTT8	Spliceosome
1538	A0A0J5PTT8	mRNA surveillance pathway
1539	A0A0J5Q751	RNA transport
1540	A0A0J5Q751	Ribosome biogenesis in eukaryotes
1541	A0A0J5PUV0	RNA transport
1542	A0A0J5PUV0	Spliceosome
1543	A0A0J5PV35	RNA transport
1544	A0A0J5PXQ0	RNA transport
1545	A0A0J5Q3L8	RNA transport
1546	A0A0J5STS2	RNA transport
1547	A0A0J5PZW7	RNA transport
1548	A0A0J5PKU4	RNA transport
1549	A0A0J5SJZ5	RNA transport
1550	A0A0J5T0F1	RNA transport
1551	A0A0J5PH08	RNA transport
1552	A0A0J5PV85	RNA transport
1553	A0A0J5PLM7	RNA transport
1554	A0A0J5SGJ7	RNA transport
1555	A0A0J5SGJ7	mRNA surveillance pathway
1556	A0A0J5PL63	RNA transport
1557	A0A0J5Q1D8	RNA transport
1558	A0A0J5Q1D8	Ribosome biogenesis in eukaryotes
1559	A0A0J5PZH4	RNA transport
1560	A0A0J5PEJ3	RNA transport
1561	A0A0J5PN72	RNA transport
1562	A0A0J5SYK4	RNA transport
1563	A0A0J5SYK4	Spliceosome
1564	A0A0J5SYK4	mRNA surveillance pathway
1565	A0A0J5PSQ7	RNA transport
1566	A0A0J5SPP7	RNA transport
1567	A0A0J5SPP7	Spliceosome
1568	A0A0J5SPP7	mRNA surveillance pathway
1569	A0A0J5Q0L0	RNA transport
1570	A0A0J5SS77	RNA transport
1571	A0A0J5SS77	mRNA surveillance pathway
1572	A0A0J5PUB3	RNA transport
1573	A0A0J5PMY2	RNA transport
1574	A0A0J5PMY2	Spliceosome
1575	A0A0J5Q3V6	RNA transport
1576	A0A0J5Q3V6	Spliceosome
1577	A0A0J5Q3V6	mRNA surveillance pathway
1578	A0A0J5PHB1	RNA transport
1579	A0A0J5PHB1	Spliceosome
1580	A0A0J5PHB1	mRNA surveillance pathway
1581	A0A0J5PDG9	RNA transport
1582	A0A0J5PUT1	RNA transport
1583	A0A0J5PJL5	RNA transport
1584	A0A0J5Q3Y4	RNA transport
1585	A0A0J5SSD1	RNA transport
1586	A0A0J5SF85	RNA transport
1587	A0A0J5Q152	RNA transport
1588	A0A0J5PVZ1	RNA transport
1589	A0A0J5PR49	RNA transport
1590	A0A0J5SS45	RNA transport
1591	A0A0J5SXZ4	RNA transport
1592	A0A0J5SXZ4	mRNA surveillance pathway
1593	A0A0J5SCJ9	RNA transport
1594	A0A0J5PZ36	RNA transport
1595	A0A0J5PXP6	RNA transport
1596	A0A0J5Q203	Riboflavin metabolism
1597	A0A0J5PQV7	Riboflavin metabolism
1598	A0A0J5Q740	Riboflavin metabolism
1599	A0A0J5PPF6	Riboflavin metabolism
1600	A0A0J5PR66	Riboflavin metabolism
1601	A0A0J5PR66	Thiamine metabolism
1602	A0A0J5Q0A1	Riboflavin metabolism
1603	A0A0J5Q0A1	Thiamine metabolism
1604	A0A0J5SNA4	Riboflavin metabolism
1605	A0A0J5SNA4	Thiamine metabolism
1606	A0A0J5SFA2	Riboflavin metabolism
1607	A0A0J5SFA2	Thiamine metabolism
1608	A0A0J5PMR3	Riboflavin metabolism
1609	A0A0J5SJN2	Riboflavin metabolism
1610	A0A0J5SJN2	Thiamine metabolism
1611	A0A0J5SKL4	Ribosome
1612	A0A0J5Q775	Ribosome
1613	A0A0J5SIW4	Ribosome
1614	A0A0J5PUX0	Ribosome
1615	A0A0J5PNA9	Ribosome
1616	A0A0J5PH66	Ribosome
1617	A0A0J5PG72	Ribosome
1618	A0A0J5PRP3	Ribosome
1619	A0A0J5Q1D2	Ribosome
1620	A0A0J5PDI6	Ribosome
1621	A0A0J5PFB1	Ribosome
1622	A0A0J5PT54	Ribosome
1623	A0A0J5PYR2	Ribosome
1624	A0A0J5SJR5	Ribosome
1625	A0A0J5Q040	Ribosome
1626	A0A0J5PMU8	Ribosome
1627	A0A0J5PL23	Ribosome
1628	A0A0J5SC65	Ribosome
1629	A0A0J5PNR7	Ribosome
1630	A0A0J5PPE4	Ribosome
1631	A0A0J5PP11	Ribosome
1632	A0A0J5PML5	Ribosome
1633	A0A0J5PPZ6	Ribosome
1634	A0A0J5PXU7	Ribosome
1635	A0A0J5Q747	Ribosome
1636	A0A0J5PZF5	Ribosome
1637	A0A0J5PI55	Ribosome
1638	A0A0J5PVC2	Ribosome
1639	A0A0J5Q372	Ribosome
1640	A0A0J5SCL3	Ribosome
1641	A0A0J5PGY0	Ribosome
1642	A0A0J5PKX4	Ribosome
1643	A0A0J5SRP5	Ribosome
1644	A0A0J5PW25	Ribosome
1645	A0A0J5PY89	Ribosome
1646	A0A0J5SDE1	Ribosome
1647	A0A0J5PMS6	Ribosome
1648	A0A0J5SSM2	Ribosome
1649	A0A0J5SSM2	Spliceosome
1650	A0A0J5PHN3	Ribosome
1651	A0A0J5Q4C3	Ribosome
1652	A0A0J5SFG0	Ribosome
1653	A0A0J5PFT3	Ribosome
1654	A0A0J5SJ77	Ribosome
1655	A0A0J5PYY4	Ribosome
1656	A0A0J5PZA0	Ribosome
1657	A0A0J5PXS3	Ribosome
1658	A0A0J5PT67	Ribosome
1659	A0A0J5PWT3	Ribosome
1660	A0A0J5SW01	Ribosome
1661	A0A0J5PKX2	Ribosome
1662	A0A0J5PT86	Ribosome
1663	A0A0J5SUE8	Ribosome
1664	A0A0J5Q4L0	Ribosome
1665	A0A0J5PFX8	Ribosome
1666	A0A0J5PYN7	Ribosome
1667	A0A0J5PIC6	Ribosome
1668	A0A0J5Q3E1	Ribosome
1669	A0A0J5PUR5	Ribosome
1670	A0A0J5PVQ2	Ribosome
1671	A0A0J5PEH6	Ribosome
1672	A0A0J5PPZ3	Ribosome
1673	A0A0J5PKY1	Ribosome
1674	A0A0J5Q0Q0	Ribosome
1675	A0A0J5PZL2	Ribosome
1676	A0A0J5Q1B0	Ribosome
1677	A0A0J5SP09	Ribosome
1678	A0A0J5Q0I9	Ribosome
1679	A0A0J5PL40	Ribosome
1680	A0A0J5SE11	Ribosome
1681	A0A0J5PHH4	Ribosome
1682	A0A0J5PYP0	Ribosome
1683	A0A0J5Q7Z8	Ribosome
1684	A0A0J5Q2N9	Ribosome
1685	A0A0J5PUM3	Ribosome
1686	A0A0J5PKR9	Ribosome
1687	A0A0J5PWQ1	Ribosome
1688	A0A0J5Q2F8	Ribosome
1689	A0A0J5SSL7	Ribosome
1690	A0A0J5PWJ7	Ribosome
1691	A0A0J5SRH5	Ribosome
1692	A0A0J5Q263	Ribosome
1693	A0A0J5PPX1	Ribosome
1694	A0A0J5PQU3	Ribosome
1695	A0A0J5SW28	Ribosome
1696	A0A0J5PZB2	Ribosome
1697	A0A0J5PPQ1	Ribosome
1698	A0A0J5PWN4	Ribosome
1699	A0A0J5SP98	Ribosome
1700	A0A0J5Q3X4	Ribosome
1701	A0A0J5SES8	Ribosome
1702	A0A0J5PUE2	Ribosome biogenesis in eukaryotes
1703	A0A0J5PQV3	Ribosome biogenesis in eukaryotes
1704	A0A0J5PV14	Ribosome biogenesis in eukaryotes
1705	A0A0J5SRD2	Ribosome biogenesis in eukaryotes
1706	A0A0J5PDJ5	Ribosome biogenesis in eukaryotes
1707	A0A0J5PNE9	Ribosome biogenesis in eukaryotes
1708	A0A0J5PNE9	Spliceosome
1709	A0A0J5PJ89	Ribosome biogenesis in eukaryotes
1710	A0A0J5Q427	Ribosome biogenesis in eukaryotes
1711	A0A0J5PUV2	Ribosome biogenesis in eukaryotes
1712	A0A0J5PX50	Ribosome biogenesis in eukaryotes
1713	A0A0J5SK76	Ribosome biogenesis in eukaryotes
1714	A0A0J5PR85	Ribosome biogenesis in eukaryotes
1715	A0A0J5PQV0	Ribosome biogenesis in eukaryotes
1716	A0A0J5Q0Z9	Ribosome biogenesis in eukaryotes
1717	A0A0J5Q4T3	Ribosome biogenesis in eukaryotes
1718	A0A0J5PXN8	Ribosome biogenesis in eukaryotes
1719	A0A0J5PYE3	Ribosome biogenesis in eukaryotes
1720	A0A0J5PRV4	Ribosome biogenesis in eukaryotes
1721	A0A0J5Q092	Ribosome biogenesis in eukaryotes
1722	A0A0J5PRL9	Ribosome biogenesis in eukaryotes
1723	A0A0J5Q0T7	Ribosome biogenesis in eukaryotes
1724	A0A0J5PEH7	Ribosome biogenesis in eukaryotes
1725	A0A0J5T046	SNARE interactions in vesicular transport
1726	A0A0J5PED1	SNARE interactions in vesicular transport
1727	A0A0J5PR91	SNARE interactions in vesicular transport
1728	A0A0J5SSE1	SNARE interactions in vesicular transport
1729	A0A0J5PXE1	SNARE interactions in vesicular transport
1730	A0A0J5PXT3	SNARE interactions in vesicular transport
1731	A0A0J5PHN7	SNARE interactions in vesicular transport
1732	A0A0J5SXE8	Selenocompound metabolism
1733	A0A0J5PX70	Selenocompound metabolism
1734	A0A0J5PJJ0	Sesquiterpenoid and triterpenoid biosynthesis
1735	A0A0J5PJJ0	Steroid biosynthesis
1736	A0A0J5Q0S0	Sphingolipid metabolism
1737	A0A0J5PFC6	Sphingolipid metabolism
1738	A0A0J5Q5T8	Sphingolipid metabolism
1739	A0A0J5PW97	Sphingolipid metabolism
1740	A0A0J5SIC1	Sphingolipid metabolism
1741	A0A0J5SJ00	Sphingolipid metabolism
1742	A0A0J5SCD2	Sphingolipid metabolism
1743	A0A0J5PDZ1	Spliceosome
1744	A0A0J5PT40	Spliceosome
1745	A0A0J5PFZ6	Spliceosome
1746	A0A0J5PYE4	Spliceosome
1747	A0A0J5PNU4	Spliceosome
1748	A0A0J5PWJ8	Spliceosome
1749	A0A0J5Q4S8	Spliceosome
1750	A0A0J5PRQ1	Spliceosome
1751	A0A0J5PST7	Spliceosome
1752	A0A0J5PQZ8	Spliceosome
1753	A0A0J5Q1L6	Spliceosome
1754	A0A0J5Q1L6	Ubiquitin mediated proteolysis
1755	A0A0J5PSG6	Spliceosome
1756	A0A0J5PDL3	Spliceosome
1757	A0A0J5PND7	Spliceosome
1758	A0A0J5SI73	Spliceosome
1759	A0A0J5PH78	Spliceosome
1760	A0A0J5SE01	Spliceosome
1761	A0A0J5Q108	Spliceosome
1762	A0A0J5Q5G4	Spliceosome
1763	A0A0J5PX34	Spliceosome
1764	A0A0J5PWW5	Spliceosome
1765	A0A0J5PHA5	Spliceosome
1766	A0A0J5PQM7	Spliceosome
1767	A0A0J5PKJ6	Spliceosome
1768	A0A0J5PN08	Spliceosome
1769	A0A0J5SCC4	Spliceosome
1770	A0A0J5SKA3	Spliceosome
1771	A0A0J5Q4K1	Spliceosome
1772	A0A0J5SNP5	Spliceosome
1773	A0A0J5PDV5	Spliceosome
1774	A0A0J5PL06	Spliceosome
1775	A0A0J5PNB3	Spliceosome
1776	A0A0J5Q417	Spliceosome
1777	A0A0J5Q0T3	Spliceosome
1778	A0A0J5Q2S5	Spliceosome
1779	A0A0J5Q415	Spliceosome
1780	A0A0J5SG35	Spliceosome
1781	A0A0J5PLY3	Spliceosome
1782	A0A0J5PVP8	Spliceosome
1783	A0A0J5Q0Z5	Spliceosome
1784	A0A0J5SHY4	Spliceosome
1785	A0A0J5PKD2	Spliceosome
1786	A0A0J5Q6B3	Spliceosome
1787	A0A0J5Q218	Spliceosome
1788	A0A0J5PWQ6	Spliceosome
1789	A0A0J5PSU6	Starch and sucrose metabolism
1790	A0A0J5PPL9	Starch and sucrose metabolism
1791	A0A0J5Q5E2	Starch and sucrose metabolism
1792	A0A0J5Q3H6	Starch and sucrose metabolism
1793	A0A0J5SSZ9	Starch and sucrose metabolism
1794	A0A0J5SKK6	Starch and sucrose metabolism
1795	A0A0J5PL36	Starch and sucrose metabolism
1796	A0A0J5Q822	Starch and sucrose metabolism
1797	A0A0J5Q462	Starch and sucrose metabolism
1798	A0A0J5SY08	Starch and sucrose metabolism
1799	A0A0J5PGC6	Starch and sucrose metabolism
1800	A0A0J5PU19	Starch and sucrose metabolism
1801	A0A0J5Q6Q1	Starch and sucrose metabolism
1802	A0A0J5SZ56	Starch and sucrose metabolism
1803	A0A0J5PGG2	Starch and sucrose metabolism
1804	A0A0J5Q2D2	Starch and sucrose metabolism
1805	A0A0J5PLL3	Starch and sucrose metabolism
1806	A0A0J5PWN2	Starch and sucrose metabolism
1807	A0A0J5PV91	Starch and sucrose metabolism
1808	A0A0J5PEF2	Starch and sucrose metabolism
1809	A0A0J5Q019	Starch and sucrose metabolism
1810	A0A0J5SNJ4	Starch and sucrose metabolism
1811	A0A0J5PM12	Starch and sucrose metabolism
1812	A0A0J5PZA7	Starch and sucrose metabolism
1813	A0A0J5PQ40	Starch and sucrose metabolism
1814	A0A0J5Q504	Starch and sucrose metabolism
1815	A0A0J5PGL9	Starch and sucrose metabolism
1816	A0A0J5T0L7	Starch and sucrose metabolism
1817	A0A0J5Q4A6	Starch and sucrose metabolism
1818	A0A0J5PK85	Staurosporine biosynthesis
1819	A0A0J5PP39	Staurosporine biosynthesis
1820	A0A0J5PP44	Staurosporine biosynthesis
1821	A0A0J5PKR7	Staurosporine biosynthesis
1822	A0A0J5PS41	Steroid biosynthesis
1823	A0A0J5PRJ0	Steroid biosynthesis
1824	A0A0J5PLK8	Steroid biosynthesis
1825	A0A0J5PLR4	Steroid biosynthesis
1826	A0A0J5SDJ3	Steroid biosynthesis
1827	A0A0J5Q2A8	Steroid biosynthesis
1828	A0A0J5PJX1	Steroid biosynthesis
1829	A0A0J5SCC8	Steroid biosynthesis
1830	A0A0J5Q255	Sulfur metabolism
1831	A0A0J5PR12	Sulfur metabolism
1832	A0A0J5Q713	Sulfur metabolism
1833	A0A0J5Q620	Sulfur metabolism
1834	A0A0J5PKJ8	Sulfur metabolism
1835	A0A0J5PDK0	Terpenoid backbone biosynthesis
1836	A0A0J5Q6L6	Terpenoid backbone biosynthesis
1837	A0A0J5PMV7	Terpenoid backbone biosynthesis
1838	A0A0J5PUK7	Terpenoid backbone biosynthesis
1839	A0A0J5PWP9	Terpenoid backbone biosynthesis
1840	A0A0J5PGX5	Terpenoid backbone biosynthesis
1841	A0A0J5PUX6	Terpenoid backbone biosynthesis
1842	A0A0J5PDS8	Terpenoid backbone biosynthesis
1843	A0A0J5PZ07	Thiamine metabolism
1844	A0A0J5PTH1	Thiamine metabolism
1845	A0A0J5Q6T3	Thiamine metabolism
1846	A0A0J5PYM0	Thiamine metabolism
1847	A0A0J5PQN2	Thiamine metabolism
1848	A0A0J5PH84	Tryptophan metabolism
1849	A0A0J5Q6I7	Tryptophan metabolism
1850	A0A0J5SW10	Tryptophan metabolism
1851	A0A0J5PEK3	Tryptophan metabolism
1852	A0A0J5PLX6	Tryptophan metabolism
1853	A0A0J5SKL9	Tyrosine metabolism
1854	A0A0J5PN15	Tyrosine metabolism
1855	A0A0J5SMZ9	Tyrosine metabolism
1856	A0A0J5STF5	Tyrosine metabolism
1857	A0A0J5PME6	Tyrosine metabolism
1858	A0A0J5Q7G6	Tyrosine metabolism
1859	A0A0J5Q2V2	Ubiquinone and other terpenoid-quinone biosynthesis
1860	A0A0J5SXF2	Ubiquinone and other terpenoid-quinone biosynthesis
1861	A0A0J5PLZ8	Ubiquinone and other terpenoid-quinone biosynthesis
1862	A0A0J5SY84	Ubiquitin mediated proteolysis
1863	A0A0J5SY84	Nucleotide excision repair
1864	A0A0J5PRR3	Ubiquitin mediated proteolysis
1865	A0A0J5Q3B7	Ubiquitin mediated proteolysis
1866	A0A0J5Q3B7	Nucleotide excision repair
1867	A0A0J5Q5Z6	Ubiquitin mediated proteolysis
1868	A0A0J5Q375	Ubiquitin mediated proteolysis
1869	A0A0J5SP78	Ubiquitin mediated proteolysis
1870	A0A0J5Q2M4	Ubiquitin mediated proteolysis
1871	A0A0J5Q184	Ubiquitin mediated proteolysis
1872	A0A0J5SUN1	Ubiquitin mediated proteolysis
1873	A0A0J5PK28	Ubiquitin mediated proteolysis
1874	A0A0J5PVZ3	Ubiquitin mediated proteolysis
1875	A0A0J5Q2X6	Ubiquitin mediated proteolysis
1876	A0A0J5SJ44	Ubiquitin mediated proteolysis
1877	A0A0J5PEJ0	Ubiquitin mediated proteolysis
1878	A0A0J5PD87	Ubiquitin mediated proteolysis
1879	A0A0J5PJK6	Ubiquitin mediated proteolysis
1880	A0A0J5Q1X4	Valine, leucine and isoleucine biosynthesis
1881	A0A0J5PS86	Valine, leucine and isoleucine degradation
1882	A0A0J5PSH8	Valine, leucine and isoleucine degradation
1883	A0A0J5PW66	Valine, leucine and isoleucine degradation
1884	A0A0J5Q7H9	Valine, leucine and isoleucine degradation
1885	A0A0J5PU54	Valine, leucine and isoleucine degradation
1886	A0A0J5PSU5	Valine, leucine and isoleucine degradation
1887	A0A0J5Q5W8	Various types of N-glycan biosynthesis
1888	A0A0J5PSB9	Vitamin B6 metabolism
1889	A0A0J5PP57	Vitamin B6 metabolism
1890	A0A0J5PSR8	Vitamin B6 metabolism
1891	A0A0J5PWW1	Vitamin B6 metabolism
1892	A0A0J5SKP7	mRNA surveillance pathway
1893	A0A0J5SHT2	mRNA surveillance pathway
1894	A0A0J5SRM2	mRNA surveillance pathway
1895	A0A0J5PQA5	mRNA surveillance pathway
1896	A0A0J5PPM3	mRNA surveillance pathway
1897	A0A0J5SP24	mRNA surveillance pathway
1898	A0A0J5SL01	mRNA surveillance pathway
1899	A0A0J5PR30	mRNA surveillance pathway
1900	A0A0J5PXB8	mRNA surveillance pathway
1901	A0A0J5PPV4	mRNA surveillance pathway
1902	A0A0J5Q2L4	mRNA surveillance pathway
1903	A0A0J5SZ75	mRNA surveillance pathway
1904	A0A0J5PUU4	mRNA surveillance pathway
1905	A0A0J5PR20	mRNA surveillance pathway
1906	A0A0J5PLI9	mRNA surveillance pathway
1907	A0A0J5PGA5	mRNA surveillance pathway
1908	A0A0J5PK67	mRNA surveillance pathway
1909	A0A0J5PVV6	mRNA surveillance pathway
1910	A0A0J5SKQ7	mRNA surveillance pathway
1911	A0A0J5PJI1	mRNA surveillance pathway
1912	A0A0J5PSU3	DNA replication
1913	A0A0J5SSU9	DNA replication
1914	A0A0J5Q344	DNA replication
1915	A0A0J5Q344	Mismatch repair
1916	A0A0J5Q344	Nucleotide excision repair
1917	A0A0J5PMY6	DNA replication
1918	A0A0J5PL68	DNA replication
1919	A0A0J5T034	DNA replication
1920	A0A0J5T034	Homologous recombination
1921	A0A0J5T034	Mismatch repair
1922	A0A0J5T034	Nucleotide excision repair
1923	A0A0J5SW26	DNA replication
1924	A0A0J5PQN8	DNA replication
1925	A0A0J5Q2H2	DNA replication
1926	A0A0J5SJF1	DNA replication
1927	A0A0J5SJF1	Mismatch repair
1928	A0A0J5SJF1	Nucleotide excision repair
1929	A0A0J5PZK7	DNA replication
1930	A0A0J5PZK7	Mismatch repair
1931	A0A0J5PZK7	Nucleotide excision repair
1932	A0A0J5PQU8	DNA replication
1933	A0A0J5PQU8	Homologous recombination
1934	A0A0J5PQU8	Mismatch repair
1935	A0A0J5PQU8	Nucleotide excision repair
1936	A0A0J5PGN5	Homologous recombination
1937	A0A0J5Q3Q2	Homologous recombination
1938	A0A0J5PXF8	Mismatch repair
1939	A0A0J5PUT6	Nucleotide excision repair
1940	A0A0J5PCV8	Nucleotide excision repair
1941	A0A0J5SCW4	Nucleotide excision repair
1942	A0A0J5SQI7	Nucleotide excision repair
1943	A0A0J5PEN7	Nucleotide excision repair
1944	A0A0J5Q0V0	Nucleotide excision repair

## Sheet: node-Cys
	Subject_id	Dim(cys)	Cys/Reference
0	A0A0J5PJ36	8.3475	-0.3
1	A0A0J5PVF9	9.345	-0.1
2	A0A0J5PLK3	11.6	0.12
3	A0A0J5Q3U7	9.64	-0.05
4	A0A0J5SQG5	9.17	-0.02
5	A0A0J5PZB8	10.125	-0.09
6	A0A0J5Q4B9	9.7775	-0.12
7	A0A0J5PNC9	9.045	-0.05
8	A0A0J5PZS3	9.8275	-0.18
9	A0A0J5Q135	8.5025	-0.15
10	A0A0J5T0H6	8.5675	0.09
11	A0A0J5PVZ9	9.4575	-0.24
12	A0A0J5Q842	10.35	-0.05
13	A0A0J5PRB3	10.865	0.06
14	A0A0J5PDC7	9.695	-0.16
15	A0A0J5PLG3	10.725	-0.24
16	A0A0J5PFR2	10.395	-0.06
18	A0A0J5PFX3	9.8675	-0.18
19	A0A0J5SXD9	8.885	-0.2
20	A0A0J5PMF1	9.1525	0.01
21	A0A0J5Q858	9.445	-0.19
22	A0A0J5PYX8	9.7975	-0.13
23	A0A0J5PFL4	9.5025	-0.18
24	A0A0J5PDB2	9.9375	-0.39
25	A0A0J5PH33	9.1725	-0.12
26	A0A0J5Q2U5	9.6225	0.1
27	A0A0J5PVK3	9.615	0.05
28	A0A0J5PUD2	9.335	-0.34
29	A0A0J5PX25	11.005	0.07
30	A0A0J5SYU2	9.2525	0.17
31	A0A0J5Q3K5	9.9225	-0.07
32	A0A0J5PVL3	10.8525	-0.07
33	A0A0J5T051	9.4075	-0.07
34	A0A0J5PVM1	9.6475	-0.19
35	A0A0J5PW89	9.6575	-0.08
36	A0A0J5SW53	10.3225	0.03
37	A0A0J5SDB7	10.175	-0.06
38	A0A0J5PNF3	9.645	0.04
39	A0A0J5PVE2	8.5125	-0.14
40	A0A0J5Q5M2	9.9925	0.06
41	A0A0J5PL46	10.1575	-0.05
42	A0A0J5PIG3	9.875	0.02
43	A0A0J5Q487	9.425	0
44	A0A0J5SWV3	9.0675	0.19
45	A0A0J5PQ76	8.815	0.09
46	A0A0J5PEM5	10.955	-0.12
47	A0A0J5Q5K8	8.66	-0.18
48	A0A0J5PRN9	10.1	-0.22
49	A0A0J5SRD4	9.5475	0.25
50	A0A0J5SQA8	10.295	-0.19
51	A0A0J5Q140	11.455	-0.2
52	A0A0J5SUS4	9.585	0.05
53	A0A0J5PI71	10.7875	-0.07
54	A0A0J5PND6	7.8975	0.02
55	A0A0J5PJT8	10.235	0.14
56	A0A0J5SG28	10.2125	-0.07
57	A0A0J5PUR8	9.815	0.16
58	A0A0J5SGH4	8.33	0.37
59	A0A0J5PU67	10.63	0.16
60	A0A0J5PR13	10.94	0.1
61	A0A0J5PVA6	10.8675	0.33
63	A0A0J5PU74	10.275	0.16
64	A0A0J5PKG8	9.5075	0.21
66	A0A0J5SRT2	9.8275	0.07
67	A0A0J5SW43	10.0625	0.06
68	A0A0J5PYJ4	9.365	0.02
69	A0A0J5PZ06	8.5375	-0.28
70	A0A0J5SJ25	8.575	0.06
71	A0A0J5PI52	9.4475	0.02
72	A0A0J5PNR4	10.2025	-0.28
73	A0A0J5Q2U0	9.0025	-0.02
74	A0A0J5SX59	9.045	0.02
75	A0A0J5SV51	10.06	-0.17
76	A0A0J5PNX4	11.825	0.07
77	A0A0J5PU23	10.6225	-0.16
78	A0A0J5PHR2	9.4825	-0.08
79	A0A0J5PK41	10.705	0.02
81	A0A0J5PSJ4	12.2875	-0.05
82	A0A0J5SYW3	10.0325	-0.21
83	A0A0J5SDV4	9.43	-0.08
84	A0A0J5PM58	9.8075	-0.12
86	A0A0J5PNT7	9.82	0.08
87	A0A0J5PSJ2	9.4275	-0.1
88	A0A0J5PU31	11.19	-0.22
89	A0A0J5Q2U3	10.2775	0.04
90	A0A0J5SQ14	10.9825	0.02
91	A0A0J5PHW0	9.5925	0.05
92	A0A0J5Q2G1	9.04	-0.18
93	A0A0J5PH80	9.6875	-0.03
95	A0A0J5Q3I8	9.8375	-0.09
96	A0A0J5PHJ6	10.205	0.12
97	A0A0J5Q1I4	10.4175	-0.26
98	A0A0J5PRM8	8.9975	0.01
99	A0A0J5Q1V0	10.3675	0.08
100	A0A0J5PJ32	10.295	0.12
101	A0A0J5PT46	10.615	-0.06
102	A0A0J5PU58	11.0475	0.04
103	A0A0J5PPU9	10.475	-0.53
104	A0A0J5PTZ5	10.725	-0.05
105	A0A0J5Q351	9.5175	0.08
106	A0A0J5Q318	10.0775	-0.16
107	A0A0J5PMP4	9.66	-0.09
108	A0A0J5PZV4	9.1025	-0.07
109	A0A0J5PG20	8.955	-0.11
110	A0A0J5Q2Q7	8.8175	0.04
111	A0A0J5PW88	9.145	-0.05
112	A0A0J5SWN6	9.77	0.02
113	A0A0J5PRG6	10.1775	-0.11
114	A0A0J5SNU1	6.78	-0.02
115	A0A0J5Q579	10.325	-0.27
116	A0A0J5PS07	9.615	-0.17
117	A0A0J5Q325	9.215	0.12
118	A0A0J5PI13	9.46	-0.16
120	A0A0J5PLM1	10.29	-0.14
121	A0A0J5Q6E8	9.98	-0.11
122	A0A0J5SFH6	8.7975	0.23
123	A0A0J5SCF2	10.4475	-0.02
124	A0A0J5Q364	9.5325	-0.01
125	A0A0J5PE77	9.4825	-0.06
126	A0A0J5PKQ8	7.0475	-0.07
127	A0A0J5PXL4	7.6525	0.13
128	A0A0J5PVR8	6.9275	0.01
129	A0A0J5Q3A7	9.915	-0.09
130	A0A0J5SQM2	8.8825	-0.16
131	A0A0J5PFG8	9.25	-0.11
132	A0A0J5Q5Y5	7.6925	-0.27
133	A0A0J5PYL1	6.715	-0.03
134	A0A0J5Q483	9.5925	-0.01
135	A0A0J5PVX5	9.77	0.01
136	A0A0J5SFJ7	9.895	-0.18
137	A0A0J5PWI2	10.275	-0.21
138	A0A0J5PYD8	6.6625	0.46
139	A0A0J5PQT3	9.1875	-0.14
140	A0A0J5PU80	8.715	-0.13
141	A0A0J5PVW1	7.16	-0.02
142	A0A0J5PG49	8.995	0.01
143	A0A0J5PRS1	9.8425	-0.03
144	A0A0J5PVJ1	9.15	0
145	A0A0J5PVB2	8.1925	-0.15
146	A0A0J5PHV5	7.8175	0.1
147	A0A0J5PWR6	10.0425	-0.1
148	A0A0J5PTI3	12.6725	-0.35
149	A0A0J5Q426	9.3	-0.27
150	A0A0J5PY94	9.7375	-0.02
151	A0A0J5Q7I7	7.635	0.03
152	A0A0J5PZZ2	9.835	-0.13
153	A0A0J5PRN6	9.49	0.02
154	A0A0J5PYD9	6.6925	-0.04
155	A0A0J5Q1I3	9.945	0.07
156	A0A0J5PPD8	10.3075	-0.06
157	A0A0J5PYG8	8.8	0.05
158	A0A0J5PVW8	9.8675	-0.03
159	A0A0J5PHT7	9.59	0.34
160	A0A0J5Q6V6	6.835	-0.09
161	A0A0J5PWZ1	9.145	-0.08
162	A0A0J5SYI0	8.1375	0.04
163	A0A0J5PYQ2	7.295	-0.23
164	A0A0J5Q167	10.295	-0.07
165	A0A0J5PT50	9.6875	-0.06
166	A0A0J5PDY9	10.0175	0
167	A0A0J5PM26	9.48	-0.08
168	A0A0J5PXI1	9.825	0.1
169	A0A0J5PFM5	9.2025	-0.01
170	A0A0J5PQP0	8.8075	0.03
171	A0A0J5PYV4	12.8925	0.14
172	A0A0J5PXA6	9.385	0.14
173	A0A0J5PSK5	9.645	-0.15
174	A0A0J5Q7E1	9.3225	0.07
175	A0A0J5PUH2	6.4625	-0.18
176	A0A0J5PJI6	11.35	0.17
177	A0A0J5Q3D9	10.4325	-0.22
178	A0A0J5PN31	10.085	0.14
179	A0A0J5PYC7	12.1875	-0.11
180	A0A0J5PKI4	7.78	-0.51
181	A0A0J5ST49	9.385	-0.39
182	A0A0J5PRW4	11.06	-0.02
183	A0A0J5PYL9	10.22	-0.28
184	A0A0J5Q3N8	9.8175	-0.08
185	A0A0J5SFF5	9.6275	-0.1
186	A0A0J5Q866	8.4675	-0.01
187	A0A0J5PEN3	9.1775	-0.04
188	A0A0J5Q240	11.3975	-0.23
189	A0A0J5SH00	9.64	0.1
190	A0A0J5PVK1	10.0625	-0.24
191	A0A0J5PSP3	10.1325	0.06
192	A0A0J5SE17	10.2025	0.07
193	A0A0J5T0I4	10.3375	-0.05
194	A0A0J5PGW6	9.8425	-0.09
195	A0A0J5Q7F7	10.065	-0.08
196	A0A0J5Q1X2	9.905	-0.01
197	A0A0J5Q5H1	11.1125	-0.15
198	A0A0J5PV58	9.695	-0.14
199	A0A0J5PLJ1	9.7075	-0.13
200	A0A0J5PGP7	9.5375	0.1
201	A0A0J5ST22	8.8625	-0.22
202	A0A0J5PHV0	10.3025	-0.09
203	A0A0J5PV41	9.9425	-0.06
204	A0A0J5SEH0	9.8225	0.17
205	A0A0J5ST40	9.2475	-0.06
206	A0A0J5Q3B6	10.27	-0.07
207	A0A0J5PJC2	11.005	-0.12
208	A0A0J5PNK4	10.3375	0.02
209	A0A0J5PUK5	9.835	-0.06
210	A0A0J5Q5L7	10.7	0.25
211	A0A0J5Q4K6	11.045	-0.08
212	A0A0J5PUW3	10.065	-0.1
213	A0A0J5PP80	7.86	-0.11
214	A0A0J5PM17	10.06	-0.19
215	A0A0J5PZT3	10.315	-0.13
216	A0A0J5PI79	10.9175	0.09
217	A0A0J5PYX9	10.1275	0.03
218	A0A0J5PUU1	9.8225	0
219	A0A0J5Q2T9	10.1825	0.23
220	A0A0J5PIZ9	7.8675	-0.09
221	A0A0J5PRS7	10.2325	-0.17
222	A0A0J5SR71	10.8825	0.03
223	A0A0J5Q018	10.325	0.26
224	A0A0J5PIB4	10.2325	0.3
225	A0A0J5PGQ9	8.6375	-0.01
226	A0A0J5T0Y2	9.98	-0.02
227	A0A0J5SJ64	9.8825	0.09
228	A0A0J5PKB4	10.1025	-0.1
229	A0A0J5T0N9	8.35	0.22
230	A0A0J5PKL5	10.0225	0.08
231	A0A0J5PKR8	7.24	-0.25
232	A0A0J5PRM6	10.5025	-0.09
233	A0A0J5PF83	9.615	-0.15
234	A0A0J5PMG9	10.455	-0.33
235	A0A0J5Q114	9.4025	-0.14
236	A0A0J5Q0B6	9.385	-0.02
237	A0A0J5PJM4	9.23	-0.13
238	A0A0J5PN10	9.3475	-0.11
239	A0A0J5PZU4	10.1425	-0.04
240	A0A0J5PR33	10.1475	-0.16
241	A0A0J5PR65	10.27	-0.4
242	A0A0J5PYH6	8.58	0.1
243	A0A0J5Q036	11.0775	0.04
244	A0A0J5PWY7	9.17	-0.1
245	A0A0J5PVQ9	9.3075	-0.12
246	A0A0J5Q0V8	10.725	-0.2
247	A0A0J5PFJ6	9.8775	-0.04
248	A0A0J5PD67	9.69	-0.2
249	A0A0J5SK20	9.665	-0.13
250	A0A0J5PTL2	10.6225	-0.23
251	A0A0J5PKK2	9.77	-0.06
252	A0A0J5Q5X5	10.5675	-0.02
253	A0A0J5SQW8	8.7225	0.08
254	A0A0J5SE88	9.135	-0.15
255	A0A0J5PVM7	10.71	-0.01
257	A0A0J5PJB6	10.1825	-0.02
258	A0A0J5PDM4	9.11	-0.15
259	A0A0J5SNE8	8.0775	-0.03
260	A0A0J5PX96	9.92	-0.15
261	A0A0J5PE23	10.8925	-0.16
262	A0A0J5PUU6	11.3575	-0.09
263	A0A0J5STE2	10.0625	-0.08
264	A0A0J5PLH0	9.69	-0.13
265	A0A0J5SQX6	7.63	0.38
266	A0A0J5PJX4	8.785	-0.28
267	A0A0J5PZE6	9.735	-0.01
268	A0A0J5Q2D9	9.38	-0.11
269	A0A0J5Q6B9	10.18	-0.11
270	A0A0J5PXE0	10.3475	-0.11
271	A0A0J5PUE8	8.91	-0.19
272	A0A0J5Q6C6	10.74	-0.09
273	A0A0J5PDK8	9.1775	0.12
274	A0A0J5Q3M4	8.365	0.22
275	A0A0J5PVM3	10.2725	-0.12
276	A0A0J5SUG3	8.345	-0.11
277	A0A0J5SGM6	8.48	-0.07
278	A0A0J5Q0J9	8.72	-0.07
279	A0A0J5PRS9	10.98	-0.15
280	A0A0J5PXJ8	7.4275	-0.4
281	A0A0J5T0V8	8.6575	-0.05
282	A0A0J5Q6F2	9.91	0.04
283	A0A0J5PRX3	10.9075	-0.02
284	A0A0J5PEI8	5.6675	0
285	A0A0J5SI75	10.3525	-0.07
286	A0A0J5PTE1	8.9275	-0.27
287	A0A0J5Q009	9.14	-0.28
288	A0A0J5PQ79	8.7575	-0.13
289	A0A0J5PYH9	8.2325	-0.14
290	A0A0J5SXG1	9.4275	0.04
291	A0A0J5SRS9	8.3875	-0.03
292	A0A0J5PRE1	9.2875	0.07
293	A0A0J5PEV4	8.1475	-0.02
294	A0A0J5PM23	10.325	-0.21
295	A0A0J5PLK9	10.2775	0.04
296	A0A0J5SQU7	10.0825	0.06
297	A0A0J5PQE7	9.2	-0.01
298	A0A0J5Q6Y8	8.51	-0.17
299	A0A0J5PR21	7.0775	-0.13
300	A0A0J5STW1	10.2725	0.07
301	A0A0J5PIH3	8.5325	0
302	A0A0J5SES1	8.645	-0.15
303	A0A0J5PRE5	9.875	-0.05
304	A0A0J5PZU8	9.2	-0.06
305	A0A0J5PPQ5	10.165	0.26
306	A0A0J5PVP1	11.745	-0.14
308	A0A0J5ST36	9.155	-0.09
309	A0A0J5Q2I5	10.215	-0.12
310	A0A0J5PYS4	10.3725	-0.04
311	A0A0J5PW55	9.5175	-0.23
312	A0A0J5PV46	9.8875	-0.02
313	A0A0J5PL51	9.825	0.25
314	A0A0J5PHV1	9.92	0.15
315	A0A0J5SEC8	10.39	0.02
316	A0A0J5Q4C9	10.245	0.05
317	A0A0J5PI44	11.0625	0.21
318	A0A0J5PKP6	9.155	-0.12
319	A0A0J5PZV2	9.555	0.04
320	A0A0J5SRZ5	6.3	-0.15
321	A0A0J5PHY4	9.6625	-0.09
323	A0A0J5PIU1	10.4925	-0.08
324	A0A0J5PUN7	10.4975	0.15
325	A0A0J5PHU0	9.7475	0.05
326	A0A0J5Q1U7	9.955	-0.04
327	A0A0J5SQV8	9.6075	-0.02
328	A0A0J5Q047	10.0975	0.09
329	A0A0J5PPX0	9.355	0.07
330	A0A0J5PQV6	8.585	-0.19
331	A0A0J5PY21	9.4325	-0.17
332	A0A0J5SSD6	7.4175	0.01
333	A0A0J5SWB3	7.6575	-0.21
334	A0A0J5SSG4	8.4375	0.02
335	A0A0J5PR25	9.9775	0.13
336	A0A0J5Q128	8.545	-0.19
337	A0A0J5PYC3	10.1125	-0.22
338	A0A0J5PGM5	7.3175	0.06
339	A0A0J5PWL0	8.585	-0.14
340	A0A0J5PU37	9.4975	-0.08
341	A0A0J5PHH6	9.84	-0.21
342	A0A0J5PT12	10.085	-0.16
343	A0A0J5PIS5	9.545	-0.02
344	A0A0J5PZ82	10.0175	0.08
345	A0A0J5PSM2	8.715	-0.04
346	A0A0J5SVW5	9.875	-0.05
347	A0A0J5SYG5	8.6	-0.06
348	A0A0J5Q1D6	8.975	0.05
349	A0A0J5PJH6	9.5125	0.12
350	A0A0J5PTJ9	8.3225	0.11
351	A0A0J5SGP0	10.2025	-0.09
352	A0A0J5PFD9	9.4275	-0.19
353	A0A0J5PY30	9.65	0.15
354	A0A0J5PWB6	10.73	-0.28
355	A0A0J5T0S8	9.8725	0.04
356	A0A0J5SGB0	10.635	-0.14
357	A0A0J5PJ55	9.615	-0.02
358	A0A0J5PK24	11.0775	-0.05
359	A0A0J5SX07	11.42	-0.12
360	A0A0J5PTV0	11.495	-0.09
361	A0A0J5SYQ5	9.9575	-0.13
362	A0A0J5PNV8	10.075	-0.03
363	A0A0J5PK09	9.57	-0.12
364	A0A0J5PYP8	10.2975	-0.13
365	A0A0J5PGU0	10.9175	0.01
366	A0A0J5SD97	9.4375	0.14
367	A0A0J5PR28	10.145	0.06
368	A0A0J5PGE8	10.0125	0.06
369	A0A0J5Q5A8	9.805	-0.04
370	A0A0J5SGS9	8.9825	0.01
371	A0A0J5PN47	10.0275	0.15
372	A0A0J5PI42	10.3875	-0.03
373	A0A0J5PGY5	10.1475	0.12
374	A0A0J5PUX4	9.2675	-0.22
375	A0A0J5PDB4	11.01	-0.04
376	A0A0J5Q4B0	9.5275	-0.1
377	A0A0J5Q5Q0	9.595	-0.01
378	A0A0J5PZ50	10.5425	-0.08
379	A0A0J5Q025	9.8275	-0.1
380	A0A0J5PIA6	10.98	0.15
381	A0A0J5PII8	9.2425	0.25
382	A0A0J5SRN8	11.1875	-0.07
383	A0A0J5Q1N6	9.22	0.03
384	A0A0J5PZ41	9.675	-0.07
385	A0A0J5PY40	10.1525	0
386	A0A0J5PKW5	5.59	-0.09
387	A0A0J5PXE8	8.75	0.03
388	A0A0J5PZK8	10.15	-0.08
389	A0A0J5PYQ6	10.485	-0.21
390	A0A0J5PHC4	8.255	0
391	A0A0J5PDE6	10.65	-0.06
392	A0A0J5PGM8	10.25	-0.11
393	A0A0J5SLA2	8.9275	-0.16
394	A0A0J5PGN9	9.3475	0.07
395	A0A0J5PH63	9.895	0.14
396	A0A0J5PH96	10.3325	0.01
397	A0A0J5Q0Q6	7.2	-0.25
398	A0A0J5Q0K6	8.9525	-0.1
399	A0A0J5PDH7	8.0825	-0.08
400	A0A0J5Q016	9.61	-0.09
401	A0A0J5PPC6	9.66	-0.12
402	A0A0J5PP12	8.24	-0.53
403	A0A0J5Q6U9	9.9075	-0.05
404	A0A0J5PT72	10.2575	0.11
405	A0A0J5PGD4	9.5425	-0.12
406	A0A0J5PIE6	9.34	0.17
407	A0A0J5SC01	9.8425	-0.07
408	A0A0J5PTJ6	9.74	-0.07
409	A0A0J5PK23	10.055	-0.1
410	A0A0J5PYK6	10.215	0
411	A0A0J5PE32	9.295	-0.19
412	A0A0J5SBZ4	8.4875	-0.06
413	A0A0J5Q0U1	9.7625	-0.16
414	A0A0J5PFF5	8.94	-0.09
415	A0A0J5PUR2	10.7625	-0.11
416	A0A0J5PUT4	10.105	-0.05
417	A0A0J5PR58	9.06	0.06
418	A0A0J5PQN3	10.4075	-0.07
419	A0A0J5SP13	10.17	-0.19
420	A0A0J5PW10	9.29	-0.19
421	A0A0J5PRD0	9.745	0.07
422	A0A0J5PVA3	10.7775	-0.04
423	A0A0J5PVQ1	9.505	-0.15
424	A0A0J5SX50	8.21	0.13
425	A0A0J5SS80	7.6825	-0.1
426	A0A0J5PT44	10.7925	-0.15
427	A0A0J5PI27	7.7175	-0.01
428	A0A0J5SPH0	9.1325	-0.21
429	A0A0J5PD89	9.4975	-0.15
430	A0A0J5SN57	10.335	-0.52
431	A0A0J5SZV2	9.5125	-0.04
432	A0A0J5PIU4	9.175	-0.09
433	A0A0J5PS33	10.3575	-0.12
434	A0A0J5SI65	8.6525	0.03
436	A0A0J5Q2B9	11.0225	-0.06
437	A0A0J5Q217	8.4875	-0.01
438	A0A0J5PG18	8.6475	-0.08
439	A0A0J5SRI8	7.315	0.22
440	A0A0J5PFZ9	10.4325	-0.05
441	A0A0J5SNF4	9.615	-0.23
442	A0A0J5PU96	9.69	-0.01
443	A0A0J5PHV6	10.4425	-0.11
444	A0A0J5Q2C9	7.465	-0.12
445	A0A0J5PWH3	10.4275	0.11
446	A0A0J5PFW6	8.4325	-0.04
447	A0A0J5Q3P9	9.5725	0.12
448	A0A0J5SEP1	9.605	-0.02
449	A0A0J5PIY7	9.76	0.07
450	A0A0J5PDC4	9.83	0
451	A0A0J5PPI2	9.8125	0.1
452	A0A0J5PWW6	7.675	0.29
453	A0A0J5PFG2	10.7275	0.12
454	A0A0J5SEH6	9.62	-0.06
455	A0A0J5Q511	7.755	-0.16
456	A0A0J5T075	9.1975	-0.05
457	A0A0J5PFS8	9.88	0.61
458	A0A0J5PEU1	9.0575	-0.12
459	A0A0J5PRW7	9.9025	-0.02
460	A0A0J5Q0S8	11.0025	0
461	A0A0J5SL09	9.13	0.01
462	A0A0J5PYK3	9.8375	-0.04
463	A0A0J5PNQ3	11.2325	-0.11
464	A0A0J5PL88	9.695	-0.07
465	A0A0J5SXJ3	10.385	-0.02
466	A0A0J5PDS9	11.785	-0.2
467	A0A0J5SWY9	10.25	-0.19
468	A0A0J5SG67	8.8025	0.04
469	A0A0J5Q1B5	8.5525	-0.22
470	A0A0J5Q041	9.1925	0
471	A0A0J5SCN9	10.3475	-0.06
472	A0A0J5SFW5	9.445	0.38
473	A0A0J5Q3J3	10.105	-0.12
474	A0A0J5PSA4	8.4675	-0.21
475	A0A0J5Q4V7	10.7625	0.07
476	A0A0J5PEV2	6.5425	-0.36
477	A0A0J5PY15	9.8875	0.06
478	A0A0J5PGJ6	9.5875	0.01
479	A0A0J5PYB7	8.005	-0.06
480	A0A0J5SSP4	8.29	-0.06
481	A0A0J5PEL4	9.995	0.04
482	A0A0J5Q6J2	10.2325	-0.21
483	A0A0J5PP93	9.69	-0.11
484	A0A0J5SDC1	10.05	-0.07
485	A0A0J5PW60	9.3075	-0.16
486	A0A0J5PEK7	10.1275	-0.02
487	A0A0J5PY62	9.4375	-0.17
488	A0A0J5PPG1	8.9675	-0.1
490	A0A0J5SP43	8.395	-0.18
491	A0A0J5Q6P9	8.09	-0.16
492	A0A0J5Q6E5	7.685	0.03
493	A0A0J5PMP0	8.625	0.19
494	A0A0J5SDI8	9.4625	-0.18
495	A0A0J5PVX2	10.295	-0.22
496	A0A0J5PKX5	10.6525	-0.47
497	A0A0J5PFA7	10.2025	-0.01
498	A0A0J5PZT8	10.135	-0.17
499	A0A0J5PZ40	10.125	-0.18
500	A0A0J5Q6X9	9	-0.04
501	A0A0J5Q4D9	9.45	-0.05
502	A0A0J5Q1K1	10.545	-0.27
503	A0A0J5Q3D4	9.4925	-0.06
504	A0A0J5Q231	9.9825	0.04
505	A0A0J5PNI5	10.835	0.13
506	A0A0J5PS38	10.31	-0.34
507	A0A0J5PW23	10.7125	-0.03
508	A0A0J5PHQ4	10.445	-0.23
509	A0A0J5PNP2	10.6275	-0.27
510	A0A0J5PRK9	9.18	0.03
511	A0A0J5PW27	9.2975	-0.37
512	A0A0J5PJE5	7.3575	-0.19
513	A0A0J5PFC9	10.035	0.09
514	A0A0J5PX97	9.9175	-0.04
515	A0A0J5PZQ6	9.8625	0.05
516	A0A0J5PN63	10.66	0.03
517	A0A0J5PWG9	10.46	-0.02
518	A0A0J5PEF9	10.5175	-0.12
519	A0A0J5PN26	9.4025	-0.01
520	A0A0J5PNF7	8.3625	-0.21
521	A0A0J5PHZ5	9.3125	-0.02
522	A0A0J5Q1B9	9.995	-0.02
523	A0A0J5PQM1	9.3925	-0.16
524	A0A0J5PJ05	6.4075	-0.16
525	A0A0J5Q133	9.4475	-0.12
526	A0A0J5SIT7	8.665	-0.23
527	A0A0J5PYD5	9.5525	-0.23
528	A0A0J5SNS9	9.685	-0.07
529	A0A0J5Q252	8.945	-0.02
530	A0A0J5PJA7	9.615	-0.19
531	A0A0J5PND4	10.6275	-0.07
532	A0A0J5Q0B1	10.01	0.01
533	A0A0J5SEB3	7.52	-0.09
534	A0A0J5Q0N8	10.8025	0.21
535	A0A0J5PDT2	10.885	-0.18
536	A0A0J5PSI0	9.815	-0.08
537	A0A0J5Q1G3	9.3675	-0.07
538	A0A0J5PUM2	9.25	-0.11
539	A0A0J5PNZ1	5.0475	-0.1
540	A0A0J5PF99	10.33	-0.04
541	A0A0J5SNR7	9.4775	0.01
542	A0A0J5PHR6	11.32	-0.32
543	A0A0J5Q2T7	10.8825	-0.14
544	A0A0J5PRC9	10.735	-0.13
545	A0A0J5PGS1	8.53	0.05
546	A0A0J5PQR6	7.53	-0.03
547	A0A0J5PVP5	7.65	0.04
548	A0A0J5PLB7	8.48	-0.02
549	A0A0J5PHX1	10.1125	0.19
550	A0A0J5PIT7	8.1575	0.09
551	A0A0J5SUB2	10.145	0.14
552	A0A0J5PJX9	11.34	-0.07
553	A0A0J5Q1W4	10.3625	-0.07
554	A0A0J5SHU9	9.745	-0.12
555	A0A0J5SVU5	9.5325	-0.14
556	A0A0J5PYL3	10.0025	-0.19
557	A0A0J5PNM5	9.0925	-0.11
558	A0A0J5SS29	8.645	-0.09
559	A0A0J5PUW0	9.6975	-0.17
560	A0A0J5SCL0	9.6425	-0.1
561	A0A0J5PHX5	10.73	-0.23
562	A0A0J5PLU5	8.7825	-0.27
563	A0A0J5PQL3	12.1875	-0.12
564	A0A0J5SNT3	8.0075	0.62
565	A0A0J5Q3A9	11.6475	-0.2
566	A0A0J5PLX2	10.0125	-0.47
567	A0A0J5PHT1	11.715	-0.39
568	A0A0J5PV72	8	-0.15
569	A0A0J5PTK0	9.02	-0.37
570	A0A0J5PZ17	11.3575	-0.2
571	A0A0J5PKY8	9.3425	-0.11
572	A0A0J5SIY5	9.17	-0.09
573	A0A0J5PM61	9.78	-0.06
574	A0A0J5SV86	8.62	0.01
575	A0A0J5PFU8	10.09	-0.38
576	A0A0J5PGE4	9.1575	-0.04
577	A0A0J5PJR5	9.75	-0.12
578	A0A0J5SNI5	9.925	-0.14
579	A0A0J5PHX6	9.1525	0.08
580	A0A0J5PIP9	9.8625	0.3
581	A0A0J5PEM4	10.6425	-0.02
582	A0A0J5Q0V2	10.405	-0.04
583	A0A0J5SW82	11.625	-0.42
584	A0A0J5SDI5	9.2	-0.46
585	A0A0J5PWD0	10.38	-0.21
586	A0A0J5Q470	9.12	0.07
587	A0A0J5SBV4	10.2975	0.33
588	A0A0J5SHU1	8.8675	0.09
589	A0A0J5Q6Y9	9.035	0.05
590	A0A0J5PFZ8	10.4475	-0.13
591	A0A0J5PZJ9	11.1425	-0.16
592	A0A0J5PQK8	9.14	-0.21
593	A0A0J5PR24	10.26	-0.04
594	A0A0J5PVL4	9.6875	-0.07
595	A0A0J5PHQ6	11.1075	-0.2
596	A0A0J5PVZ4	8.095	-0.19
597	A0A0J5Q705	9.49	-0.03
598	A0A0J5PSQ5	10.31	-0.01
599	A0A0J5PYD1	8.89	-0.16
600	A0A0J5Q2V6	9.13	-0.01
601	A0A0J5PSR3	9.4275	-0.1
602	A0A0J5PPW1	10.99	-0.26
603	A0A0J5SNY8	10.1375	-0.02
604	A0A0J5PRL0	9.525	-0.03
605	A0A0J5PR78	9.2325	0.08
606	A0A0J5PZ87	8.875	-0.01
607	A0A0J5PV62	9.8875	-0.35
608	A0A0J5PUB0	9.75	-0.02
609	A0A0J5PDC0	10.505	0.47
610	A0A0J5PY66	11.1525	-0.34
611	A0A0J5PWJ2	9.925	0.07
612	A0A0J5Q0M2	8.975	-0.14
613	A0A0J5SV38	10.3825	-0.09
614	A0A0J5PWS8	10.0575	-0.16
615	A0A0J5PQ44	9.8525	0.11
616	A0A0J5SBW0	10.7275	-0.07
617	A0A0J5PJ19	8.5425	0.07
618	A0A0J5PWQ8	10.245	0.16
619	A0A0J5PY18	10.2525	0.1
620	A0A0J5Q021	10.26	0.13
621	A0A0J5PY47	12.0125	-0.42
622	A0A0J5PL15	11.1125	-0.13
623	A0A0J5Q2A5	10.7075	-0.08
624	A0A0J5PK74	9.3925	-0.04
625	A0A0J5PMF3	11.565	-0.35
626	A0A0J5PF60	8.7725	-0.05
627	A0A0J5PJM2	9.965	0.1
628	A0A0J5PU61	8.715	-0.05
629	A0A0J5SXL4	9.8575	-0.07
630	A0A0J5PJW0	10.6725	-0.14
631	A0A0J5PPW2	9.795	-0.07
632	A0A0J5SQ22	9.9	-0.17
633	A0A0J5PLR9	9.045	-0.04
634	A0A0J5PJ79	11.145	-0.08
635	A0A0J5PM40	8.985	-0.11
636	A0A0J5Q7C1	8.735	-0.23
637	A0A0J5SRC6	9.9125	-0.22
638	A0A0J5PLY5	7.245	-0.2
639	A0A0J5Q103	9.4025	-0.15
640	A0A0J5PZN6	8.7075	0
641	A0A0J5SPW8	9.105	-0.29
642	A0A0J5PGT2	8.9825	0.06
644	A0A0J5SDE5	6.8225	0.06
645	A0A0J5Q7F5	10.285	0.13
646	A0A0J5PTP1	8.705	-0.04
647	A0A0J5SNJ8	9.49	-0.12
648	A0A0J5PLS2	10.425	0.04
649	A0A0J5Q3T6	12.1275	-1.1
650	A0A0J5Q6Y5	9.155	0.12
651	A0A0J5ST99	7.8875	-0.05
652	A0A0J5PGI9	9.3975	0.12
653	A0A0J5PUY7	10.055	0.1
654	A0A0J5PI00	10.17	0.07
655	A0A0J5PYQ0	9.485	0.02
656	A0A0J5PSK0	9.66	-0.06
657	A0A0J5PYT4	9.0675	0.06
658	A0A0J5PYQ9	6.0825	-0.05
659	A0A0J5PXW8	5.31	-0.44
660	A0A0J5SPH8	10.2425	0.07
661	A0A0J5PMY4	8.57	-0.19
662	A0A0J5PUD0	9.2225	-0.06
663	A0A0J5PF02	11.02	0.18
664	A0A0J5PH37	9.8275	-0.07
665	A0A0J5SCL7	7.7625	0.08
666	A0A0J5Q2G8	9.3725	-0.15
667	A0A0J5PPI7	8.4025	-0.07
668	A0A0J5PUE5	9.6725	0.05
669	A0A0J5SIH2	9.9425	-0.01
670	A0A0J5SXY9	8.1875	0.06
671	A0A0J5PRA4	9.6675	0.14
672	A0A0J5PGJ3	9.88	-0.01
674	A0A0J5PKC8	10.4375	-0.3
675	A0A0J5Q5E1	9.7675	-0.03
676	A0A0J5Q1H9	10.385	0.06
677	A0A0J5PRP9	9.5775	-0.29
678	A0A0J5PQH0	9.8775	-0.14
679	A0A0J5PRK7	9.7575	-0.37
680	A0A0J5PDT9	10.38	0.11
681	A0A0J5PI29	10.7425	0.16
682	A0A0J5SG89	8.875	-0.19
683	A0A0J5Q3S1	8.5225	0.09
684	A0A0J5Q244	9.75	0.06
685	A0A0J5SD58	9.3575	-0.29
686	A0A0J5SUJ6	10.24	-0.21
687	A0A0J5SGN3	9.5525	-0.17
688	A0A0J5PRE6	9.755	-0.21
689	A0A0J5PWW3	6.335	-0.09
690	A0A0J5SDC4	11.3625	-0.35
691	A0A0J5Q2Q4	8.1025	-0.08
692	A0A0J5PS96	9.9425	-0.06
693	A0A0J5PVY3	5.845	-0.08
694	A0A0J5SQR3	7.4425	-0.06
695	A0A0J5PLI1	9.6375	-0.18
696	A0A0J5Q4L5	9.9875	0.02
697	A0A0J5PTT9	10.325	0.14
698	A0A0J5Q2S0	6.9375	0.09
699	A0A0J5Q2R3	9.1625	0.25
700	A0A0J5PFU7	9.7375	-0.09
701	A0A0J5SDM3	10.9025	0.17
703	A0A0J5PI70	10.4275	-0.08
704	A0A0J5Q690	9.8475	-0.12
705	A0A0J5SYY7	10.59	0.15
706	A0A0J5SPE7	8.4975	-0.01
707	A0A0J5PT48	9.57	-0.08
708	A0A0J5PTR8	10.4275	-0.04
709	A0A0J5Q1X8	10.5675	-0.08
710	A0A0J5PYA5	9.5675	-0.1
711	A0A0J5PXN2	10.01	0.06
712	A0A0J5PL25	9.4775	0.39
713	A0A0J5PNJ4	9.885	-0.09
714	A0A0J5PDW8	8.78	0.03
715	A0A0J5PH65	10.565	-0.09
716	A0A0J5Q2W2	10.685	-0.07
717	A0A0J5PXZ9	9.695	0.04
718	A0A0J5PEL1	8.685	-0.09
719	A0A0J5Q2N5	8.295	0.03
720	A0A0J5PHE4	10.9575	-0.09
721	A0A0J5PX13	9.9725	-0.19
722	A0A0J5PTD3	10.2425	-0.07
723	A0A0J5PMJ3	10.145	0
724	A0A0J5PFK7	9.9425	-0.15
725	A0A0J5Q3V2	10.135	0.02
726	A0A0J5SSU4	7.92	0.24
727	A0A0J5Q6M9	9.1025	0.24
728	A0A0J5PVE5	8.8225	0.11
729	A0A0J5Q214	10.4125	0.04
730	A0A0J5Q1V9	9.4075	-0.13
731	A0A0J5PLK7	6.85	-0.12
732	A0A0J5Q2T5	9.88	0.04
733	A0A0J5SNV5	9.205	-0.12
734	A0A0J5PFK5	8.92	-0.04
735	A0A0J5PUX5	7.9875	-0.32
736	A0A0J5PYS9	9.1875	-0.27
737	A0A0J5PGC9	9.0375	-0.06
738	A0A0J5SFL8	10.38	-0.18
739	A0A0J5PQ17	8.65	-0.02
740	A0A0J5PTY1	10.065	-0.11
741	A0A0J5PMH5	9.115	-0.3
742	A0A0J5Q3V7	9.0175	-0.07
743	A0A0J5SG93	9.6725	-0.17
744	A0A0J5SJT8	9.785	0.04
745	A0A0J5SPP9	10.68	-0.13
746	A0A0J5PQ55	9.945	-0.11
747	A0A0J5PRH2	13.075	-0.25
748	A0A0J5PKD6	8.825	0.01
749	A0A0J5Q031	7.92	-0.25
750	A0A0J5PYK2	8.84	-0.38
751	A0A0J5Q2X5	9.4525	-0.08
752	A0A0J5SC73	10.5975	-0.01
753	A0A0J5PJ97	9.835	-0.03
754	A0A0J5Q854	9.705	-0.13
755	A0A0J5PPV5	9.37	-0.09
756	A0A0J5PYW0	10.64	-0.1
757	A0A0J5Q1Z3	10.88	-0.34
758	A0A0J5PIN2	9.03	0.14
759	A0A0J5PDH8	9.1925	-0.12
760	A0A0J5PX72	10.3475	0.12
761	A0A0J5PRV8	9.1375	-0.26
763	A0A0J5PYQ7	9.0425	-0.1
764	A0A0J5SJW5	10.0875	-0.13
765	A0A0J5PDU0	10.6925	-0.12
766	A0A0J5PRK0	8.4825	-0.15
767	A0A0J5PW28	10.3425	-0.15
768	A0A0J5PXA9	10.14	-0.2
769	A0A0J5PRR1	10.4925	-0.29
770	A0A0J5PX49	9.4075	-0.2
771	A0A0J5PXH1	9.0925	-0.08
772	A0A0J5PKT4	10.1825	-0.19
773	A0A0J5SWG1	9.01	-0.18
774	A0A0J5Q3G5	10.1175	-0.17
775	A0A0J5PNM2	6.4375	-0.22
776	A0A0J5Q170	8.07	0
777	A0A0J5PJ22	10.1175	-0.17
778	A0A0J5Q4N8	8.725	-0.06
779	A0A0J5Q3N5	10.2775	-0.16
780	A0A0J5PRE9	9.8175	-0.22
781	A0A0J5Q0M5	8.2225	0.14
782	A0A0J5Q544	9.22	-0.21
783	A0A0J5SG11	10.4675	-0.11
784	A0A0J5PV22	9.8975	-0.34
785	A0A0J5PR61	8.96	-0.1
786	A0A0J5PY00	9.1425	-0.1
787	A0A0J5PLR7	9.325	-0.21
788	A0A0J5PJ56	9.0475	-0.02
789	A0A0J5PRY4	9.89	-0.08
790	A0A0J5PHD3	11.54	-0.26
791	A0A0J5PYL8	10.6875	-0.33
792	A0A0J5PHH0	11.4575	-0.62
793	A0A0J5SZD0	8.615	-0.09
794	A0A0J5PVT5	9.7875	-0.12
795	A0A0J5PQZ1	11.5	-0.2
796	A0A0J5Q378	10.7775	-0.05
797	A0A0J5SXH8	10.7275	-0.09
798	A0A0J5PFB8	9.46	-0.1
799	A0A0J5PQ18	10.3175	-0.17
800	A0A0J5PZH7	9.85	-0.19
801	A0A0J5SC31	10.04	0.08
802	A0A0J5PHA4	11.51	-0.02
803	A0A0J5SVR8	6.19	0.16
804	A0A0J5PWV3	10.1775	-0.1
805	A0A0J5PRD4	8.4175	-0.03
806	A0A0J5PQJ9	9.7075	0.28
807	A0A0J5Q839	9.52	0.17
808	A0A0J5PTV8	8.165	-0.27
809	A0A0J5PVZ5	10.695	-0.28
810	A0A0J5SRX7	8.01	-0.08
811	A0A0J5PE20	8.8775	0
812	A0A0J5Q4M9	7.98	-0.06
813	A0A0J5PLV2	9.9875	-0.07
814	A0A0J5Q4M2	9.6925	-0.11
815	A0A0J5SIA1	9.7675	-0.04
816	A0A0J5PLW5	11.085	-0.11
817	A0A0J5PTW5	10.0375	-0.14
818	A0A0J5SJP5	10.365	0.08
819	A0A0J5SQQ8	9.36	-0.25
820	A0A0J5PLU3	8.6375	-0.1
821	A0A0J5PLF5	9.4025	-0.18
822	A0A0J5PRN1	9.7675	-0.05
823	A0A0J5PZ31	10.2025	-0.18
824	A0A0J5SNS5	9.915	0.14
825	A0A0J5PMR5	10.295	-0.1
826	A0A0J5PDB8	10.83	0.03
827	A0A0J5PM88	9.2225	-0.12
828	A0A0J5PXW3	9.97	-0.17
829	A0A0J5PRM9	10.145	-0.09
830	A0A0J5PZQ1	9.995	-0.02
831	A0A0J5PZ55	9.7625	-0.05
832	A0A0J5PNA6	7.7825	-0.22
833	A0A0J5PL42	9.4	-0.16
834	A0A0J5SEQ2	8.35	0.08
835	A0A0J5PR37	9.5275	-0.12
836	A0A0J5PLN6	8.825	-0.31
837	A0A0J5PJ26	8.9425	-0.05
838	A0A0J5Q5P1	8.815	-0.1
839	A0A0J5Q3Y0	9.67	0.11
840	A0A0J5PWA2	10.165	-0.25
841	A0A0J5Q4M0	10.1525	-0.15
842	A0A0J5PFF4	9.8	-0.05
843	A0A0J5PY14	9.48	-0.12
844	A0A0J5PN98	8.7325	-0.09
845	A0A0J5PST0	8.56	0.04
846	A0A0J5Q215	6.69	-0.27
847	A0A0J5SDP2	7.0275	-0.11
848	A0A0J5PYP6	10.285	0.04
849	A0A0J5PVR2	10.2275	-0.18
850	A0A0J5Q1I6	8.235	0
851	A0A0J5Q2W4	10.7725	-0.24
852	A0A0J5PUS6	9.3025	0.03
853	A0A0J5PJE1	9.875	-0.1
854	A0A0J5Q288	8.5725	-0.15
855	A0A0J5SUQ0	9.555	-0.35
857	A0A0J5PXJ4	9.7425	0.12
858	A0A0J5SS19	7.195	-0.22
859	A0A0J5Q441	8.0025	-0.04
860	A0A0J5Q023	7.82	-0.24
861	A0A0J5SX98	6.7525	0.08
862	A0A0J5Q0K4	8.5475	-0.05
863	A0A0J5PNU3	9.605	-0.2
864	A0A0J5Q366	8.0575	-0.02
865	A0A0J5Q3Q8	8.265	-0.25
866	A0A0J5Q176	10.155	0.05
867	A0A0J5SKW5	9.8725	0.05
868	A0A0J5PF93	7.6425	-0.15
869	A0A0J5PGQ6	9.09	-0.13
870	A0A0J5SW34	9.79	-0.15
871	A0A0J5Q3T7	10.1875	-0.08
872	A0A0J5PS68	10.1825	-0.04
873	A0A0J5PN45	8.55	0
874	A0A0J5PYP1	8.9525	-0.25
875	A0A0J5PZ44	7.84	-0.11
876	A0A0J5Q0R0	9.2625	-0.24
877	A0A0J5Q3G2	5.21	-0.75
878	A0A0J5PMV4	8.93	-0.1
879	A0A0J5PI48	11.6875	-0.57
880	A0A0J5SU18	9.945	-0.11
881	A0A0J5Q395	9.7325	0.25
882	A0A0J5Q2H3	10.2725	-0.12
883	A0A0J5PSE0	10.3	-0.02
884	A0A0J5PZL9	8.63	0.1
885	A0A0J5STK6	7.0875	-0.12
886	A0A0J5PX76	9.1475	-0.14
887	A0A0J5PPY9	9.8025	0.24
888	A0A0J5PGW0	9.1075	-0.17
889	A0A0J5SER2	9.0575	0.16
890	A0A0J5PTT8	10.0825	-0.18
891	A0A0J5Q751	11.07	-0.03
892	A0A0J5PUV0	7.66	-0.23
893	A0A0J5PV35	9.865	-0.13
894	A0A0J5PXQ0	9.635	-0.23
895	A0A0J5Q3L8	8.755	-0.13
896	A0A0J5STS2	11.0325	-0.06
897	A0A0J5PZW7	10.0125	-0.14
898	A0A0J5PKU4	9.275	-0.15
899	A0A0J5SJZ5	9.7225	-0.08
900	A0A0J5T0F1	8.6825	-0.12
901	A0A0J5PH08	9.74	0.02
902	A0A0J5PV85	9.7675	-0.14
903	A0A0J5PLM7	8.7825	-0.06
904	A0A0J5SGJ7	6.77	0.11
905	A0A0J5PL63	9.4325	-0.17
906	A0A0J5Q1D8	8.3925	0.27
907	A0A0J5PZH4	10.0625	-0.24
908	A0A0J5PEJ3	9.885	-0.06
909	A0A0J5PN72	10.66	-0.13
910	A0A0J5SYK4	9.92	-0.15
911	A0A0J5PSQ7	6.635	0.16
912	A0A0J5SPP7	10.1975	-0.24
913	A0A0J5Q0L0	9.7125	-0.21
914	A0A0J5SS77	7.405	-0.15
915	A0A0J5PUB3	9.84	0.03
916	A0A0J5PMY2	9.7325	-0.07
917	A0A0J5Q3V6	8.405	-0.25
918	A0A0J5PHB1	8.53	-0.04
919	A0A0J5PDG9	9.595	0.08
920	A0A0J5PUT1	9.9375	-0.03
921	A0A0J5PJL5	11.7625	-0.07
922	A0A0J5Q3Y4	9.82	-0.09
923	A0A0J5SSD1	11.5625	-0.25
924	A0A0J5SF85	9.715	-0.17
925	A0A0J5Q152	9.4325	0.16
926	A0A0J5PVZ1	8.7475	-0.15
927	A0A0J5PR49	9.4925	-0.05
928	A0A0J5SS45	9.8	-0.23
929	A0A0J5SXZ4	9.995	-0.06
930	A0A0J5SCJ9	9.5775	-0.24
931	A0A0J5PZ36	9.05	0.16
932	A0A0J5PXP6	9.2375	0
933	A0A0J5Q203	10.4	0.08
934	A0A0J5PQV7	10.3075	-0.28
935	A0A0J5Q740	8.2325	-0.11
936	A0A0J5PPF6	11.2625	0.08
937	A0A0J5PR66	9.355	0.13
938	A0A0J5Q0A1	8.205	-0.15
939	A0A0J5SNA4	10.605	-0.03
940	A0A0J5SFA2	9.6	-0.09
941	A0A0J5PMR3	8.1975	-0.24
942	A0A0J5SJN2	12.0425	0.06
943	A0A0J5SKL4	10.4125	-0.17
944	A0A0J5Q775	11.3375	-0.26
945	A0A0J5SIW4	12.25	-0.21
946	A0A0J5PUX0	9.4725	-0.17
947	A0A0J5PNA9	10.855	-0.35
948	A0A0J5PH66	10.3275	-0.27
949	A0A0J5PG72	10.7475	0.38
950	A0A0J5PRP3	10.4975	-0.22
951	A0A0J5Q1D2	9.3775	-0.12
952	A0A0J5PDI6	10.0125	-0.39
953	A0A0J5PFB1	10.1525	-0.31
954	A0A0J5PT54	9.04	-0.21
955	A0A0J5PYR2	10.2675	0.1
956	A0A0J5SJR5	7.0375	-0.15
957	A0A0J5Q040	9.3	-0.08
958	A0A0J5PMU8	8.55	-0.35
959	A0A0J5PL23	9.1825	-0.18
960	A0A0J5SC65	9.13	-0.07
961	A0A0J5PNR7	9.74	-0.22
962	A0A0J5PPE4	10.415	0.03
963	A0A0J5PP11	9.4825	-0.01
964	A0A0J5PML5	12.1175	-0.06
965	A0A0J5PPZ6	10.135	-0.12
966	A0A0J5PXU7	10.1325	-0.08
967	A0A0J5Q747	11.055	-0.3
968	A0A0J5PZF5	11.0225	0.03
969	A0A0J5PI55	10.74	-0.29
970	A0A0J5PVC2	7.1825	0.01
971	A0A0J5Q372	10.5275	-0.11
972	A0A0J5SCL3	10.59	-0.09
973	A0A0J5PGY0	11.315	-0.39
974	A0A0J5PKX4	11.645	-0.3
975	A0A0J5SRP5	9.745	-0.08
976	A0A0J5PW25	8.46	-0.07
977	A0A0J5PY89	10.2775	-0.23
978	A0A0J5SDE1	9.0425	-0.11
979	A0A0J5PMS6	8.83	-0.17
980	A0A0J5SSM2	10.845	-0.33
982	A0A0J5PHN3	11.645	-0.01
983	A0A0J5Q4C3	8.3475	-0.07
984	A0A0J5SFG0	9.25	-0.04
985	A0A0J5PFT3	11.255	0
986	A0A0J5SJ77	7.0525	-0.28
987	A0A0J5PYY4	10.2475	-0.22
988	A0A0J5PZA0	10.0375	-0.17
989	A0A0J5PXS3	9.7775	-0.14
990	A0A0J5PT67	9.3525	-0.24
991	A0A0J5PWT3	10.335	-0.19
992	A0A0J5SW01	11.5125	-0.01
993	A0A0J5PKX2	11.2375	-0.17
994	A0A0J5PT86	9.94	-0.17
995	A0A0J5SUE8	9.855	-0.14
996	A0A0J5Q4L0	11.4325	-0.2
997	A0A0J5PFX8	9.5625	-0.3
998	A0A0J5PYN7	10.485	0.04
999	A0A0J5PIC6	11.665	-0.12
1000	A0A0J5Q3E1	10.435	-0.09
1001	A0A0J5PUR5	10.83	-0.04
1002	A0A0J5PVQ2	6.265	-0.13
1003	A0A0J5PEH6	10.63	-0.2
1004	A0A0J5PPZ3	10.8825	-0.17
1005	A0A0J5PKY1	10.4525	-0.1
1006	A0A0J5Q0Q0	10.845	-0.21
1007	A0A0J5PZL2	12.0325	-0.19
1008	A0A0J5Q1B0	9.0275	-0.19
1009	A0A0J5SP09	10.885	-0.29
1010	A0A0J5Q0I9	9.2025	-0.32
1011	A0A0J5PL40	8.5025	-0.32
1012	A0A0J5SE11	9.4625	-0.09
1013	A0A0J5PHH4	10.605	-0.11
1014	A0A0J5PYP0	9.2725	-0.08
1015	A0A0J5Q7Z8	9.86	-0.3
1016	A0A0J5Q2N9	11.6175	-0.09
1017	A0A0J5PUM3	10.3725	-0.05
1018	A0A0J5PKR9	9.68	-0.21
1019	A0A0J5PWQ1	11.51	-0.22
1020	A0A0J5Q2F8	11.0475	-0.17
1021	A0A0J5SSL7	10.5475	-0.11
1022	A0A0J5PWJ7	11.76	-0.17
1023	A0A0J5SRH5	10.4875	-0.05
1024	A0A0J5Q263	9.665	-0.22
1025	A0A0J5PPX1	11.35	-0.13
1026	A0A0J5PQU3	7.8625	-0.13
1027	A0A0J5SW28	9.4425	-0.22
1028	A0A0J5PZB2	7.1975	-0.18
1029	A0A0J5PPQ1	6.4725	-0.37
1030	A0A0J5PWN4	11.435	-0.14
1031	A0A0J5SP98	9.485	-0.14
1032	A0A0J5Q3X4	11.1075	-0.19
1033	A0A0J5SES8	11.8925	-0.25
1034	A0A0J5PUE2	10.0475	0.05
1035	A0A0J5PQV3	9.3325	0
1036	A0A0J5PV14	7.565	-0.36
1037	A0A0J5SRD2	7.7625	-0.01
1038	A0A0J5PDJ5	6.74	-0.16
1039	A0A0J5PNE9	9.805	0.15
1040	A0A0J5PJ89	8.09	-0.06
1041	A0A0J5Q427	10.2525	-0.15
1042	A0A0J5PUV2	8.255	0.26
1043	A0A0J5PX50	9.6575	-0.04
1044	A0A0J5SK76	9.7175	-0.03
1045	A0A0J5PR85	7.0675	-0.18
1046	A0A0J5PQV0	6.9225	0.02
1047	A0A0J5Q0Z9	9.525	-0.17
1048	A0A0J5Q4T3	10.215	-0.09
1049	A0A0J5PXN8	8.47	-0.2
1050	A0A0J5PYE3	8.77	-0.12
1051	A0A0J5PRV4	9.25	-0.06
1052	A0A0J5Q092	7.775	0.29
1053	A0A0J5PRL9	11.0075	-0.33
1054	A0A0J5Q0T7	6.6525	-0.36
1055	A0A0J5PEH7	9.8375	-0.11
1056	A0A0J5T046	8.5875	0.03
1057	A0A0J5PED1	8.6625	-0.29
1058	A0A0J5PR91	9.09	0.32
1059	A0A0J5SSE1	8.2625	0.23
1060	A0A0J5PXE1	9.2525	0.24
1061	A0A0J5PXT3	6.78	0.08
1062	A0A0J5PHN7	9.2825	-0.06
1063	A0A0J5SXE8	9.975	-0.15
1064	A0A0J5PX70	9.4625	0.04
1065	A0A0J5PJJ0	9.115	0.01
1066	A0A0J5Q0S0	8.1125	-0.12
1067	A0A0J5PFC6	9.8425	0.32
1068	A0A0J5Q5T8	10.3175	0.01
1069	A0A0J5PW97	8.3775	0.03
1070	A0A0J5SIC1	9.5075	-0.1
1071	A0A0J5SJ00	10.215	0.17
1072	A0A0J5SCD2	6.3325	-0.37
1073	A0A0J5PDZ1	7.7	-0.12
1074	A0A0J5PT40	7.3725	-0.02
1075	A0A0J5PFZ6	9.8925	-0.36
1076	A0A0J5PYE4	10.315	0.02
1077	A0A0J5PNU4	8.9125	-0.15
1078	A0A0J5PWJ8	9.315	-0.32
1079	A0A0J5Q4S8	8.56	-0.24
1080	A0A0J5PRQ1	7.615	-0.15
1081	A0A0J5PST7	8.1975	-0.2
1082	A0A0J5PQZ8	10.1025	0.12
1083	A0A0J5Q1L6	11.82	0.14
1084	A0A0J5PSG6	8.7325	-0.13
1085	A0A0J5PDL3	10.7175	-0.13
1086	A0A0J5PND7	7.48	-0.1
1087	A0A0J5SI73	10.1425	-0.04
1088	A0A0J5PH78	8.7325	0.27
1089	A0A0J5SE01	9.435	-0.38
1090	A0A0J5Q108	10.1175	0.11
1091	A0A0J5Q5G4	10.5275	-0.12
1092	A0A0J5PX34	9.72	-0.05
1093	A0A0J5PWW5	8.9625	-0.01
1094	A0A0J5PHA5	11.2225	-0.32
1095	A0A0J5PQM7	8.9275	0
1096	A0A0J5PKJ6	9.7875	0.27
1097	A0A0J5PN08	9.9775	0.1
1098	A0A0J5SCC4	10.7925	-0.3
1099	A0A0J5SKA3	8.55	-0.04
1100	A0A0J5Q4K1	10.265	-0.19
1101	A0A0J5SNP5	7.78	-0.12
1102	A0A0J5PDV5	10.1475	0.09
1103	A0A0J5PL06	9.35	0.18
1104	A0A0J5PNB3	8.2775	0.16
1105	A0A0J5Q417	9.6625	0.1
1106	A0A0J5Q0T3	8.1	-0.08
1107	A0A0J5Q2S5	8.6775	-0.11
1108	A0A0J5Q415	7.9875	-0.22
1109	A0A0J5SG35	9.6375	-0.17
1110	A0A0J5PLY3	9.415	0.07
1111	A0A0J5PVP8	10.365	-0.05
1112	A0A0J5Q0Z5	8.7625	-0.24
1113	A0A0J5SHY4	8.7275	0.12
1114	A0A0J5PKD2	8.095	-0.39
1115	A0A0J5Q6B3	10.475	-0.3
1116	A0A0J5Q218	9.625	-0.06
1117	A0A0J5PWQ6	9.81	-0.08
1118	A0A0J5PSU6	9.8025	0.03
1119	A0A0J5PPL9	9.3625	0.21
1120	A0A0J5Q5E2	10.1475	-0.06
1121	A0A0J5Q3H6	10.625	0.18
1122	A0A0J5SSZ9	9.6175	-0.11
1123	A0A0J5SKK6	9.4125	-0.13
1124	A0A0J5PL36	7.97	-0.23
1125	A0A0J5Q822	9.685	-0.31
1126	A0A0J5Q462	11.6175	0.26
1127	A0A0J5SY08	8.8	0.04
1128	A0A0J5PGC6	9.8075	0.06
1129	A0A0J5PU19	10.6675	-0.03
1130	A0A0J5Q6Q1	9.93	0.23
1131	A0A0J5SZ56	10.1775	0.13
1132	A0A0J5PGG2	11.3525	0.28
1133	A0A0J5Q2D2	10.6675	-0.11
1134	A0A0J5PLL3	10.0275	0.04
1135	A0A0J5PWN2	10.5025	0.07
1136	A0A0J5PV91	9.2525	-0.13
1137	A0A0J5PEF2	10.8675	0.12
1138	A0A0J5Q019	9.6175	0.08
1139	A0A0J5SNJ4	9.24	-0.13
1140	A0A0J5PM12	8.43	-0.14
1141	A0A0J5PZA7	9.5825	-0.01
1142	A0A0J5PQ40	8.8825	0.36
1143	A0A0J5Q504	9.7075	0.2
1144	A0A0J5PGL9	8.9475	0.03
1145	A0A0J5T0L7	8.4875	0.35
1146	A0A0J5Q4A6	10.435	0.16
1147	A0A0J5PK85	9.7525	0.2
1148	A0A0J5PP39	7.9625	0.13
1149	A0A0J5PP44	10.0775	0.15
1150	A0A0J5PKR7	9.6225	0.09
1151	A0A0J5PS41	9.9425	-0.19
1152	A0A0J5PRJ0	10.305	0
1153	A0A0J5PLK8	8.7775	0.02
1154	A0A0J5PLR4	10.5925	-0.08
1155	A0A0J5SDJ3	6.6975	0
1156	A0A0J5Q2A8	10.9825	0.02
1157	A0A0J5PJX1	9.8275	-0.18
1158	A0A0J5SCC8	10.08	-0.21
1159	A0A0J5Q255	9.345	-0.37
1160	A0A0J5PR12	8.4275	-0.05
1161	A0A0J5Q713	8.3325	-0.25
1162	A0A0J5Q620	8.755	-0.66
1163	A0A0J5PKJ8	8.3825	-0.15
1164	A0A0J5PDK0	10.62	0.02
1165	A0A0J5Q6L6	10.0475	-0.04
1166	A0A0J5PMV7	9.335	-0.2
1167	A0A0J5PUK7	10.72	0.06
1168	A0A0J5PWP9	8.9825	-0.12
1169	A0A0J5PGX5	9.025	-0.1
1170	A0A0J5PUX6	10.3575	0.04
1171	A0A0J5PDS8	7.8175	0.03
1172	A0A0J5PZ07	10.04	-0.01
1173	A0A0J5PTH1	10.445	-0.02
1174	A0A0J5Q6T3	10.6325	-0.28
1175	A0A0J5PYM0	8.5625	0.32
1176	A0A0J5PQN2	10.08	-0.32
1177	A0A0J5PH84	9.085	0.01
1178	A0A0J5Q6I7	8.615	-0.01
1179	A0A0J5SW10	8.4475	0.11
1180	A0A0J5PEK3	10.2	-0.14
1181	A0A0J5PLX6	9.0025	0.02
1182	A0A0J5SKL9	10.3425	0.08
1183	A0A0J5PN15	9.3725	0.01
1184	A0A0J5SMZ9	9.7125	-0.02
1185	A0A0J5STF5	9.6625	-0.09
1186	A0A0J5PME6	8.7175	0.05
1187	A0A0J5Q7G6	11.11	-0.27
1188	A0A0J5Q2V2	8.8175	-0.11
1189	A0A0J5SXF2	7.9125	0.05
1190	A0A0J5PLZ8	11.325	0.15
1191	A0A0J5SY84	9.32	-0.14
1192	A0A0J5PRR3	9.0075	-0.15
1193	A0A0J5Q3B7	10.055	-0.01
1194	A0A0J5Q5Z6	7.7225	-0.16
1195	A0A0J5Q375	9.3025	-0.18
1196	A0A0J5SP78	8.87	0.02
1197	A0A0J5Q2M4	8.0575	-0.18
1198	A0A0J5Q184	7.44	-0.08
1199	A0A0J5SUN1	9.855	-0.02
1200	A0A0J5PK28	9.0575	-0.07
1201	A0A0J5PVZ3	11.9375	0
1202	A0A0J5Q2X6	10.0175	-0.2
1203	A0A0J5SJ44	9.3275	-0.12
1204	A0A0J5PEJ0	7.9725	-0.17
1205	A0A0J5PD87	8.65	-0.23
1206	A0A0J5PJK6	8.92	-0.27
1207	A0A0J5Q1X4	9.1125	-0.12
1208	A0A0J5PS86	8.505	0.07
1209	A0A0J5PSH8	9.9175	0.13
1210	A0A0J5PW66	10.4925	-0.03
1211	A0A0J5Q7H9	9.895	0.16
1212	A0A0J5PU54	7.505	-0.1
1213	A0A0J5PSU5	10.265	-0.08
1214	A0A0J5Q5W8	11.09	-0.15
1215	A0A0J5PSB9	9.79	-0.2
1216	A0A0J5PP57	6.83	0.08
1217	A0A0J5PSR8	9.6675	-0.17
1218	A0A0J5PWW1	9.8825	-0.29
1219	A0A0J5SKP7	9.585	-0.05
1220	A0A0J5SHT2	10.3425	-0.29
1221	A0A0J5SRM2	8.6025	-0.07
1222	A0A0J5PQA5	8.85	-0.16
1223	A0A0J5PPM3	10.57	-0.07
1224	A0A0J5SP24	9.42	-0.06
1225	A0A0J5SL01	9.5625	-0.12
1226	A0A0J5PR30	9.5125	-0.14
1227	A0A0J5PXB8	9.4	-0.05
1228	A0A0J5PPV4	8.165	-0.2
1229	A0A0J5Q2L4	9.995	0.06
1230	A0A0J5SZ75	8.79	-0.11
1231	A0A0J5PUU4	8.3275	-0.26
1232	A0A0J5PR20	10.295	-0.19
1233	A0A0J5PLI9	7.4725	-0.27
1234	A0A0J5PGA5	6.18	0.2
1235	A0A0J5PK67	8.8075	-0.15
1236	A0A0J5PVV6	8.695	-0.18
1237	A0A0J5SKQ7	8.9875	-0.14
1238	A0A0J5PJI1	7.9075	-0.09
1239	A0A0J5PSU3	7.84	-0.06
1240	A0A0J5SSU9	10.33	-0.06
1241	A0A0J5Q344	8.44	-0.22
1242	A0A0J5PMY6	8.58	-0.09
1243	A0A0J5PL68	7.7125	-0.11
1244	A0A0J5T034	10.825	-0.38
1245	A0A0J5SW26	6.4625	-0.11
1246	A0A0J5PQN8	8.3	-0.06
1247	A0A0J5Q2H2	7.9025	-0.01
1248	A0A0J5SJF1	7.7125	0.03
1249	A0A0J5PZK7	8.0225	-0.02
1250	A0A0J5PQU8	9.495	-0.17
1251	A0A0J5PGN5	9.7075	-0.08
1252	A0A0J5Q3Q2	8.395	-0.23
1253	A0A0J5PXF8	8.9075	-0.11
1254	A0A0J5PUT6	9	0.21
1255	A0A0J5PCV8	9.38	-0.05
1256	A0A0J5SCW4	7.6	-0.07
1257	A0A0J5SQI7	9.725	0.09
1258	A0A0J5PEN7	8.4125	-0.05
1259	A0A0J5Q0V0	9.9775	-0.2

## Sheet: edge-Met
	Subject_id	PATHWAY
0	A0A0J5PYX8	Alanine, aspartate and glutamate metabolism
1	A0A0J5PYX8	Purine metabolism
2	A0A0J5PFR2	Alanine, aspartate and glutamate metabolism
3	A0A0J5PFR2	Butanoate metabolism
4	A0A0J5PFR2	Lysine degradation
5	A0A0J5PFR2	Nicotinate and nicotinamide metabolism
6	A0A0J5PFR2	Tyrosine metabolism
7	A0A0J5PFR2	Alanine, aspartate and glutamate metabolism
8	A0A0J5PFR2	Butanoate metabolism
9	A0A0J5PFR2	Lysine degradation
10	A0A0J5PFR2	Nicotinate and nicotinamide metabolism
11	A0A0J5PFR2	Tyrosine metabolism
12	A0A0J5PVL3	Alanine, aspartate and glutamate metabolism
13	A0A0J5PVL3	Butanoate metabolism
14	A0A0J5PVL3	Propanoate metabolism
15	A0A0J5PVL3	Valine, leucine and isoleucine degradation
16	A0A0J5PVL3	beta-Alanine metabolism
17	A0A0J5PMF1	Alanine, aspartate and glutamate metabolism
18	A0A0J5PMF1	Cyanoamino acid metabolism
19	A0A0J5Q5M2	Alanine, aspartate and glutamate metabolism
20	A0A0J5Q5M2	Arginine biosynthesis
21	A0A0J5PFX3	Alanine, aspartate and glutamate metabolism
22	A0A0J5PFX3	Arginine biosynthesis
23	A0A0J5PFX3	Glyoxylate and dicarboxylate metabolism
24	A0A0J5PFX3	Nitrogen metabolism
25	A0A0J5PX25	Alanine, aspartate and glutamate metabolism
26	A0A0J5PX25	Glycine, serine and threonine metabolism
27	A0A0J5PX25	Glyoxylate and dicarboxylate metabolism
28	A0A0J5PX25	Methane metabolism
29	A0A0J5PX25	Peroxisome
30	A0A0J5SYU2	Alanine, aspartate and glutamate metabolism
31	A0A0J5SYU2	Amino sugar and nucleotide sugar metabolism
32	A0A0J5PUD2	Alanine, aspartate and glutamate metabolism
33	A0A0J5PUD2	Butanoate metabolism
34	A0A0J5PUD2	Taurine and hypotaurine metabolism
35	A0A0J5PUD2	beta-Alanine metabolism
36	A0A0J5Q858	Alanine, aspartate and glutamate metabolism
37	A0A0J5Q858	Butanoate metabolism
38	A0A0J5Q858	Taurine and hypotaurine metabolism
39	A0A0J5Q858	beta-Alanine metabolism
40	A0A0J5PRB3	Alanine, aspartate and glutamate metabolism
41	A0A0J5PRB3	Arginine biosynthesis
42	A0A0J5PW89	Alanine, aspartate and glutamate metabolism
43	A0A0J5PW89	Nitrogen metabolism
44	A0A0J5PVK3	Alanine, aspartate and glutamate metabolism
45	A0A0J5PVK3	Butanoate metabolism
46	A0A0J5Q2U5	Alanine, aspartate and glutamate metabolism
47	A0A0J5Q2U5	Arginine and proline metabolism
48	A0A0J5T051	Alanine, aspartate and glutamate metabolism
49	A0A0J5T051	Pyrimidine metabolism
50	A0A0J5PLG3	Alanine, aspartate and glutamate metabolism
51	A0A0J5PLG3	Cyanoamino acid metabolism
52	A0A0J5PDC7	Alanine, aspartate and glutamate metabolism
53	A0A0J5SXD9	Alanine, aspartate and glutamate metabolism
54	A0A0J5SXD9	Arginine biosynthesis
55	A0A0J5SXD9	Glyoxylate and dicarboxylate metabolism
56	A0A0J5SXD9	Nitrogen metabolism
57	A0A0J5PFL4	Alanine, aspartate and glutamate metabolism
58	A0A0J5PFL4	Purine metabolism
59	A0A0J5SW53	Alanine, aspartate and glutamate metabolism
60	A0A0J5SW53	Arginine and proline metabolism
61	A0A0J5SW53	Arginine biosynthesis
62	A0A0J5SW53	Cysteine and methionine metabolism
63	A0A0J5SW53	Phenylalanine metabolism
64	A0A0J5SW53	Phenylalanine, tyrosine and tryptophan biosynthesis
65	A0A0J5SW53	Tyrosine metabolism
66	A0A0J5PVE2	Alanine, aspartate and glutamate metabolism
67	A0A0J5PVE2	Arginine biosynthesis
68	A0A0J5PNF3	Alanine, aspartate and glutamate metabolism
69	A0A0J5PNF3	Arginine biosynthesis
70	A0A0J5PNF3	Nitrogen metabolism
71	A0A0J5PNF3	Taurine and hypotaurine metabolism
72	A0A0J5PH33	Alanine, aspartate and glutamate metabolism
73	A0A0J5PH33	Purine metabolism
74	A0A0J5Q842	Alanine, aspartate and glutamate metabolism
75	A0A0J5PDB2	Alanine, aspartate and glutamate metabolism
76	A0A0J5PDB2	Arginine biosynthesis
77	A0A0J5PDB2	Nitrogen metabolism
78	A0A0J5SDB7	Alanine, aspartate and glutamate metabolism
79	A0A0J5SDB7	Arginine and proline metabolism
80	A0A0J5SDB7	Arginine biosynthesis
81	A0A0J5SDB7	Cysteine and methionine metabolism
82	A0A0J5SDB7	Phenylalanine metabolism
83	A0A0J5SDB7	Phenylalanine, tyrosine and tryptophan biosynthesis
84	A0A0J5SDB7	Tyrosine metabolism
85	A0A0J5PVM1	Alanine, aspartate and glutamate metabolism
86	A0A0J5PVM1	Pyrimidine metabolism
87	A0A0J5Q3K5	Alanine, aspartate and glutamate metabolism
88	A0A0J5Q3K5	Pyrimidine metabolism
89	A0A0J5PIG3	Amino sugar and nucleotide sugar metabolism
90	A0A0J5PL46	Amino sugar and nucleotide sugar metabolism
91	A0A0J5PL46	Fructose and mannose metabolism
92	A0A0J5PL46	Galactose metabolism
93	A0A0J5PL46	Glycolysis / Gluconeogenesis
94	A0A0J5PL46	Starch and sucrose metabolism
95	A0A0J5PI71	Amino sugar and nucleotide sugar metabolism
96	A0A0J5PI71	Fructose and mannose metabolism
97	A0A0J5PI71	Galactose metabolism
98	A0A0J5PI71	Glycolysis / Gluconeogenesis
99	A0A0J5PI71	Starch and sucrose metabolism
100	A0A0J5PRN9	Amino sugar and nucleotide sugar metabolism
101	A0A0J5PRN9	Fructose and mannose metabolism
102	A0A0J5PRN9	Galactose metabolism
103	A0A0J5PRN9	Glycolysis / Gluconeogenesis
104	A0A0J5PRN9	Starch and sucrose metabolism
105	A0A0J5PNT7	Amino sugar and nucleotide sugar metabolism
106	A0A0J5Q5K8	Amino sugar and nucleotide sugar metabolism
107	A0A0J5Q5K8	Fructose and mannose metabolism
108	A0A0J5PYJ4	Amino sugar and nucleotide sugar metabolism
109	A0A0J5Q2U0	Amino sugar and nucleotide sugar metabolism
110	A0A0J5PKG8	Amino sugar and nucleotide sugar metabolism
111	A0A0J5PKG8	Amino sugar and nucleotide sugar metabolism
112	A0A0J5PEM5	Amino sugar and nucleotide sugar metabolism
113	A0A0J5PEM5	Fructose and mannose metabolism
114	A0A0J5SV51	Amino sugar and nucleotide sugar metabolism
115	A0A0J5PM58	Amino sugar and nucleotide sugar metabolism
116	A0A0J5PM58	Amino sugar and nucleotide sugar metabolism
117	A0A0J5PNR4	Amino sugar and nucleotide sugar metabolism
118	A0A0J5PK41	Amino sugar and nucleotide sugar metabolism
119	A0A0J5PK41	Amino sugar and nucleotide sugar metabolism
120	A0A0J5PQ76	Amino sugar and nucleotide sugar metabolism
121	A0A0J5Q140	Amino sugar and nucleotide sugar metabolism
122	A0A0J5SUS4	Amino sugar and nucleotide sugar metabolism
123	A0A0J5PSJ2	Amino sugar and nucleotide sugar metabolism
124	A0A0J5PSJ2	Fructose and mannose metabolism
125	A0A0J5SYW3	Amino sugar and nucleotide sugar metabolism
126	A0A0J5SYW3	Fructose and mannose metabolism
127	A0A0J5PJT8	Amino sugar and nucleotide sugar metabolism
128	A0A0J5PJT8	Glycosaminoglycan degradation
129	A0A0J5PJT8	Glycosphingolipid biosynthesis - globo and isoglobo series
130	A0A0J5PJT8	Various types of N-glycan biosynthesis
131	A0A0J5PND6	Amino sugar and nucleotide sugar metabolism
132	A0A0J5PND6	Glycosaminoglycan degradation
133	A0A0J5SRD4	Amino sugar and nucleotide sugar metabolism
134	A0A0J5SRD4	Glycosaminoglycan degradation
135	A0A0J5SWV3	Amino sugar and nucleotide sugar metabolism
136	A0A0J5SWV3	Glycosaminoglycan degradation
137	A0A0J5SWV3	Glycosphingolipid biosynthesis - globo and isoglobo series
138	A0A0J5SWV3	Various types of N-glycan biosynthesis
139	A0A0J5SW43	Amino sugar and nucleotide sugar metabolism
140	A0A0J5SW43	Glycolysis / Gluconeogenesis
141	A0A0J5SW43	Pentose phosphate pathway
142	A0A0J5SW43	Starch and sucrose metabolism
143	A0A0J5PU23	Amino sugar and nucleotide sugar metabolism
144	A0A0J5PU23	Galactose metabolism
145	A0A0J5PU23	Glycolysis / Gluconeogenesis
146	A0A0J5PU23	Pentose phosphate pathway
147	A0A0J5PU23	Purine metabolism
148	A0A0J5PU23	Starch and sucrose metabolism
149	A0A0J5PNX4	Amino sugar and nucleotide sugar metabolism
150	A0A0J5PSJ4	Amino sugar and nucleotide sugar metabolism
151	A0A0J5SG28	Amino sugar and nucleotide sugar metabolism
152	A0A0J5Q487	Amino sugar and nucleotide sugar metabolism
153	A0A0J5Q487	Fructose and mannose metabolism
154	A0A0J5PI52	Amino sugar and nucleotide sugar metabolism
155	A0A0J5SX59	Amino sugar and nucleotide sugar metabolism
156	A0A0J5PVA6	Amino sugar and nucleotide sugar metabolism
157	A0A0J5PVA6	Amino sugar and nucleotide sugar metabolism
158	A0A0J5PU74	Amino sugar and nucleotide sugar metabolism
159	A0A0J5SDV4	Amino sugar and nucleotide sugar metabolism
160	A0A0J5SQA8	Amino sugar and nucleotide sugar metabolism
161	A0A0J5SQA8	Galactose metabolism
162	A0A0J5PR13	Amino sugar and nucleotide sugar metabolism
163	A0A0J5SJ25	Amino sugar and nucleotide sugar metabolism
164	A0A0J5SRT2	Amino sugar and nucleotide sugar metabolism
165	A0A0J5SRT2	Galactose metabolism
166	A0A0J5PZ06	Amino sugar and nucleotide sugar metabolism
167	A0A0J5PZ06	Galactose metabolism
168	A0A0J5SGH4	Amino sugar and nucleotide sugar metabolism
169	A0A0J5PHR2	Amino sugar and nucleotide sugar metabolism
170	A0A0J5PHR2	Galactose metabolism
171	A0A0J5PHR2	Pentose and glucuronate interconversions
172	A0A0J5PHR2	Starch and sucrose metabolism
173	A0A0J5PUR8	Amino sugar and nucleotide sugar metabolism
174	A0A0J5PU67	Amino sugar and nucleotide sugar metabolism
175	A0A0J5PU31	Arachidonic acid metabolism
176	A0A0J5PU31	Glutathione metabolism
177	A0A0J5Q2U3	Arachidonic acid metabolism
178	A0A0J5PZV4	Arginine and proline metabolism
179	A0A0J5PZV4	Glyoxylate and dicarboxylate metabolism
180	A0A0J5PU58	Arginine and proline metabolism
181	A0A0J5PU58	Arginine biosynthesis
182	A0A0J5Q1I4	Arginine and proline metabolism
183	A0A0J5PRM8	Arginine and proline metabolism
184	A0A0J5PPU9	Arginine and proline metabolism
185	A0A0J5PPU9	Pyrimidine metabolism
186	A0A0J5SNU1	Arginine and proline metabolism
187	A0A0J5SNU1	Cysteine and methionine metabolism
188	A0A0J5SWN6	Arginine and proline metabolism
189	A0A0J5SWN6	Carbapenem biosynthesis
190	A0A0J5PTZ5	Arginine and proline metabolism
191	A0A0J5PTZ5	Glycine, serine and threonine metabolism
192	A0A0J5PTZ5	Histidine metabolism
193	A0A0J5PTZ5	Phenylalanine metabolism
194	A0A0J5PTZ5	Tryptophan metabolism
195	A0A0J5PTZ5	Tyrosine metabolism
196	A0A0J5Q579	Arginine and proline metabolism
197	A0A0J5Q579	Cysteine and methionine metabolism
198	A0A0J5Q579	Glutathione metabolism
199	A0A0J5Q579	beta-Alanine metabolism
200	A0A0J5PHW0	Arginine and proline metabolism
201	A0A0J5PHW0	beta-Alanine metabolism
202	A0A0J5SQ14	Arginine and proline metabolism
203	A0A0J5SQ14	beta-Alanine metabolism
204	A0A0J5Q351	Arginine and proline metabolism
205	A0A0J5Q351	D-Arginine and D-ornithine metabolism
206	A0A0J5Q351	Glycine, serine and threonine metabolism
207	A0A0J5Q351	Penicillin and cephalosporin biosynthesis
208	A0A0J5Q351	Peroxisome
209	A0A0J5PT46	Arginine and proline metabolism
210	A0A0J5PT46	D-Arginine and D-ornithine metabolism
211	A0A0J5PT46	Glycine, serine and threonine metabolism
212	A0A0J5PT46	Penicillin and cephalosporin biosynthesis
213	A0A0J5PT46	Peroxisome
214	A0A0J5Q1V0	Arginine and proline metabolism
215	A0A0J5PG20	Arginine and proline metabolism
216	A0A0J5Q2Q7	Arginine and proline metabolism
217	A0A0J5PRG6	Arginine and proline metabolism
218	A0A0J5PMP4	Arginine and proline metabolism
219	A0A0J5PJ32	Arginine and proline metabolism
220	A0A0J5PJ32	Phenylalanine metabolism
221	A0A0J5PJ32	Tryptophan metabolism
222	A0A0J5PW88	Arginine and proline metabolism
223	A0A0J5PW88	Phenylalanine metabolism
224	A0A0J5PW88	Tryptophan metabolism
225	A0A0J5Q318	Arginine and proline metabolism
226	A0A0J5Q318	Ascorbate and aldarate metabolism
227	A0A0J5Q318	Fatty acid degradation
228	A0A0J5Q318	Glycerolipid metabolism
229	A0A0J5Q318	Glycolysis / Gluconeogenesis
230	A0A0J5Q318	Histidine metabolism
231	A0A0J5Q318	Lysine degradation
232	A0A0J5Q318	Pyruvate metabolism
233	A0A0J5Q318	Tryptophan metabolism
234	A0A0J5Q318	Valine, leucine and isoleucine degradation
235	A0A0J5Q318	beta-Alanine metabolism
236	A0A0J5PHJ6	Arginine and proline metabolism
237	A0A0J5PHJ6	Ascorbate and aldarate metabolism
238	A0A0J5PHJ6	Fatty acid degradation
239	A0A0J5PHJ6	Glycerolipid metabolism
240	A0A0J5PHJ6	Glycolysis / Gluconeogenesis
241	A0A0J5PHJ6	Histidine metabolism
242	A0A0J5PHJ6	Lysine degradation
243	A0A0J5PHJ6	Pyruvate metabolism
244	A0A0J5PHJ6	Tryptophan metabolism
245	A0A0J5PHJ6	Valine, leucine and isoleucine degradation
246	A0A0J5PHJ6	beta-Alanine metabolism
247	A0A0J5Q3I8	Arginine and proline metabolism
248	A0A0J5Q3I8	Ascorbate and aldarate metabolism
249	A0A0J5Q3I8	Fatty acid degradation
250	A0A0J5Q3I8	Glycerolipid metabolism
251	A0A0J5Q3I8	Glycolysis / Gluconeogenesis
252	A0A0J5Q3I8	Histidine metabolism
253	A0A0J5Q3I8	Lysine degradation
254	A0A0J5Q3I8	Pyruvate metabolism
255	A0A0J5Q3I8	Tryptophan metabolism
256	A0A0J5Q3I8	Valine, leucine and isoleucine degradation
257	A0A0J5Q3I8	beta-Alanine metabolism
258	A0A0J5PH80	Arginine and proline metabolism
259	A0A0J5PH80	Phenylalanine metabolism
260	A0A0J5PH80	Tryptophan metabolism
261	A0A0J5PH80	Glycosylphosphatidylinositol (GPI)-anchor biosynthesis
262	A0A0J5Q2G1	Arginine and proline metabolism
263	A0A0J5Q2G1	Phenylalanine metabolism
264	A0A0J5Q2G1	Tryptophan metabolism
265	A0A0J5PLM1	Arginine biosynthesis
266	A0A0J5PLM1	Atrazine degradation
267	A0A0J5PLM1	Purine metabolism
268	A0A0J5SFH6	Arginine biosynthesis
269	A0A0J5SFH6	Atrazine degradation
270	A0A0J5PI13	Arginine biosynthesis
271	A0A0J5Q325	Arginine biosynthesis
272	A0A0J5SCF2	Arginine biosynthesis
273	A0A0J5PS07	Arginine biosynthesis
274	A0A0J5Q6E8	Arginine biosynthesis
275	A0A0J5PM26	Autophagy - yeast
276	A0A0J5PM26	MAPK signaling pathway - yeast
277	A0A0J5PM26	Mitophagy - yeast
278	A0A0J5PVB2	Autophagy - yeast
279	A0A0J5PVJ1	Autophagy - yeast
280	A0A0J5PRS1	Autophagy - yeast
281	A0A0J5PVW1	Autophagy - yeast
282	A0A0J5PVW1	Inositol phosphate metabolism
283	A0A0J5PTI3	Autophagy - yeast
284	A0A0J5PTI3	Mitophagy - yeast
285	A0A0J5PY94	Autophagy - yeast
286	A0A0J5PQT3	Autophagy - yeast
287	A0A0J5PVX5	Autophagy - yeast
288	A0A0J5Q3A7	Autophagy - yeast
289	A0A0J5PU80	Autophagy - yeast
290	A0A0J5PVR8	Autophagy - yeast
291	A0A0J5PWI2	Autophagy - yeast
292	A0A0J5SQM2	Autophagy - yeast
293	A0A0J5Q483	Autophagy - yeast
294	A0A0J5PVW8	Autophagy - yeast
295	A0A0J5SFJ7	Autophagy - yeast
296	A0A0J5PHV5	Autophagy - yeast
297	A0A0J5PFG8	Autophagy - yeast
298	A0A0J5PZB8	Autophagy - yeast
299	A0A0J5SQG5	Autophagy - yeast
300	A0A0J5Q6V6	Autophagy - yeast
301	A0A0J5Q426	Autophagy - yeast
302	A0A0J5PYG8	Autophagy - yeast
303	A0A0J5PRN6	Autophagy - yeast
304	A0A0J5PZZ2	Autophagy - yeast
305	A0A0J5PYD8	Autophagy - yeast
306	A0A0J5PE77	Autophagy - yeast
307	A0A0J5PE77	Mitophagy - yeast
308	A0A0J5Q7I7	Autophagy - yeast
309	A0A0J5PWZ1	Autophagy - yeast
310	A0A0J5PWZ1	Mitophagy - yeast
311	A0A0J5Q364	Autophagy - yeast
312	A0A0J5PYL1	Autophagy - yeast
313	A0A0J5PYL1	Glycerolipid metabolism
314	A0A0J5PHT7	Autophagy - yeast
315	A0A0J5PG49	Autophagy - yeast
316	A0A0J5PG49	Sphingolipid metabolism
317	A0A0J5PXL4	Autophagy - yeast
318	A0A0J5PT50	Autophagy - yeast
319	A0A0J5Q167	Autophagy - yeast
320	A0A0J5PKQ8	Autophagy - yeast
321	A0A0J5PKQ8	Inositol phosphate metabolism
322	A0A0J5PWR6	Autophagy - yeast
323	A0A0J5Q5Y5	Autophagy - yeast
324	A0A0J5PPD8	Autophagy - yeast
325	A0A0J5PYQ2	Autophagy - yeast
326	A0A0J5PYQ2	Mitophagy - yeast
327	A0A0J5Q1I3	Autophagy - yeast
328	A0A0J5PYD9	Autophagy - yeast
329	A0A0J5SYI0	Autophagy - yeast
330	A0A0J5PDY9	Autophagy - yeast
331	A0A0J5PFM5	Biotin metabolism
332	A0A0J5PQP0	Biotin metabolism
333	A0A0J5PQP0	Fatty acid biosynthesis
334	A0A0J5PYV4	Biotin metabolism
335	A0A0J5PXI1	Biotin metabolism
336	A0A0J5PXI1	Fatty acid biosynthesis
337	A0A0J5PXA6	Biotin metabolism
338	A0A0J5PXA6	Fatty acid biosynthesis
339	A0A0J5PYL9	Butanoate metabolism
340	A0A0J5PYL9	Synthesis and degradation of ketone bodies
341	A0A0J5PYL9	Terpenoid backbone biosynthesis
342	A0A0J5PYL9	Valine, leucine and isoleucine degradation
343	A0A0J5PRW4	Butanoate metabolism
344	A0A0J5PRW4	Phenylalanine metabolism
345	A0A0J5PYC7	Butanoate metabolism
346	A0A0J5PYC7	Synthesis and degradation of ketone bodies
347	A0A0J5PYC7	Valine, leucine and isoleucine degradation
348	A0A0J5PYC7	Peroxisome
349	A0A0J5Q3N8	Butanoate metabolism
350	A0A0J5Q3N8	Synthesis and degradation of ketone bodies
351	A0A0J5Q3N8	Valine, leucine and isoleucine degradation
352	A0A0J5ST49	Butanoate metabolism
353	A0A0J5ST49	Synthesis and degradation of ketone bodies
354	A0A0J5ST49	Valine, leucine and isoleucine degradation
355	A0A0J5PJI6	Butanoate metabolism
356	A0A0J5PJI6	Fatty acid degradation
357	A0A0J5PJI6	Glyoxylate and dicarboxylate metabolism
358	A0A0J5PJI6	Lysine degradation
359	A0A0J5PJI6	Propanoate metabolism
360	A0A0J5PJI6	Pyruvate metabolism
361	A0A0J5PJI6	Synthesis and degradation of ketone bodies
362	A0A0J5PJI6	Terpenoid backbone biosynthesis
363	A0A0J5PJI6	Tryptophan metabolism
364	A0A0J5PJI6	Valine, leucine and isoleucine degradation
365	A0A0J5Q7E1	Butanoate metabolism
366	A0A0J5Q7E1	Fatty acid degradation
367	A0A0J5Q7E1	Glyoxylate and dicarboxylate metabolism
368	A0A0J5Q7E1	Lysine degradation
369	A0A0J5Q7E1	Propanoate metabolism
370	A0A0J5Q7E1	Pyruvate metabolism
371	A0A0J5Q7E1	Synthesis and degradation of ketone bodies
372	A0A0J5Q7E1	Terpenoid backbone biosynthesis
373	A0A0J5Q7E1	Tryptophan metabolism
374	A0A0J5Q7E1	Valine, leucine and isoleucine degradation
375	A0A0J5PSK5	Butanoate metabolism
376	A0A0J5PSK5	Synthesis and degradation of ketone bodies
377	A0A0J5PUH2	Butanoate metabolism
378	A0A0J5PUH2	C5-Branched dibasic acid metabolism
379	A0A0J5PUH2	Pantothenate and CoA biosynthesis
380	A0A0J5PUH2	Valine, leucine and isoleucine biosynthesis
381	A0A0J5PN31	Butanoate metabolism
382	A0A0J5PN31	Valine, leucine and isoleucine degradation
383	A0A0J5Q3D9	Butanoate metabolism
384	A0A0J5Q3D9	Fatty acid degradation
385	A0A0J5Q3D9	Fatty acid elongation
386	A0A0J5Q3D9	Lysine degradation
387	A0A0J5Q3D9	Propanoate metabolism
388	A0A0J5Q3D9	Tryptophan metabolism
389	A0A0J5Q3D9	Valine, leucine and isoleucine degradation
390	A0A0J5Q3D9	beta-Alanine metabolism
391	A0A0J5PKI4	Butanoate metabolism
392	A0A0J5PKI4	Fatty acid degradation
393	A0A0J5PKI4	Fatty acid elongation
394	A0A0J5PKI4	Lysine degradation
395	A0A0J5PKI4	Propanoate metabolism
396	A0A0J5PKI4	Tryptophan metabolism
397	A0A0J5PKI4	Valine, leucine and isoleucine degradation
398	A0A0J5PKI4	beta-Alanine metabolism
399	A0A0J5SFF5	C5-Branched dibasic acid metabolism
400	A0A0J5SFF5	Valine, leucine and isoleucine biosynthesis
401	A0A0J5Q866	C5-Branched dibasic acid metabolism
402	A0A0J5Q866	Valine, leucine and isoleucine biosynthesis
403	A0A0J5PEN3	Caffeine metabolism
404	A0A0J5PEN3	Purine metabolism
405	A0A0J5PEN3	Peroxisome
406	A0A0J5Q240	Caffeine metabolism
407	A0A0J5Q240	Purine metabolism
408	A0A0J5SH00	Carotenoid biosynthesis
409	A0A0J5PSP3	Citrate cycle (TCA cycle)
410	A0A0J5PSP3	Oxidative phosphorylation
411	A0A0J5PJC2	Citrate cycle (TCA cycle)
412	A0A0J5PJC2	Pyruvate metabolism
413	A0A0J5Q5H1	Citrate cycle (TCA cycle)
414	A0A0J5Q1X2	Citrate cycle (TCA cycle)
415	A0A0J5PLJ1	Citrate cycle (TCA cycle)
416	A0A0J5PLJ1	Glycolysis / Gluconeogenesis
417	A0A0J5PLJ1	Pyruvate metabolism
418	A0A0J5SE17	Citrate cycle (TCA cycle)
419	A0A0J5SE17	Cysteine and methionine metabolism
420	A0A0J5SE17	Glyoxylate and dicarboxylate metabolism
421	A0A0J5SE17	Pyruvate metabolism
422	A0A0J5PVK1	Citrate cycle (TCA cycle)
423	A0A0J5PVK1	Oxidative phosphorylation
424	A0A0J5Q5L7	Citrate cycle (TCA cycle)
425	A0A0J5Q5L7	Glycolysis / Gluconeogenesis
426	A0A0J5Q5L7	Pyruvate metabolism
427	A0A0J5PHV0	Citrate cycle (TCA cycle)
428	A0A0J5PHV0	Cysteine and methionine metabolism
429	A0A0J5PHV0	Glyoxylate and dicarboxylate metabolism
430	A0A0J5PHV0	Pyruvate metabolism
431	A0A0J5SEH0	Citrate cycle (TCA cycle)
432	A0A0J5SEH0	Glyoxylate and dicarboxylate metabolism
433	A0A0J5PV41	Citrate cycle (TCA cycle)
434	A0A0J5PV41	Glyoxylate and dicarboxylate metabolism
435	A0A0J5PP80	Citrate cycle (TCA cycle)
436	A0A0J5PP80	Glycolysis / Gluconeogenesis
437	A0A0J5PP80	Pyruvate metabolism
438	A0A0J5ST40	Citrate cycle (TCA cycle)
439	A0A0J5ST40	Glycolysis / Gluconeogenesis
440	A0A0J5ST40	Pyruvate metabolism
441	A0A0J5PV58	Citrate cycle (TCA cycle)
442	A0A0J5PV58	Oxidative phosphorylation
443	A0A0J5PUW3	Citrate cycle (TCA cycle)
444	A0A0J5PUW3	Glutathione metabolism
445	A0A0J5PUW3	Peroxisome
446	A0A0J5Q7F7	Citrate cycle (TCA cycle)
447	A0A0J5ST22	Citrate cycle (TCA cycle)
448	A0A0J5ST22	Lysine degradation
449	A0A0J5T0I4	Citrate cycle (TCA cycle)
450	A0A0J5T0I4	Glyoxylate and dicarboxylate metabolism
451	A0A0J5PGW6	Citrate cycle (TCA cycle)
452	A0A0J5PGW6	Pyruvate metabolism
453	A0A0J5PUK5	Citrate cycle (TCA cycle)
454	A0A0J5PUK5	Propanoate metabolism
455	A0A0J5PGP7	Citrate cycle (TCA cycle)
456	A0A0J5PGP7	Lysine degradation
457	A0A0J5PGP7	Tryptophan metabolism
458	A0A0J5Q3B6	Citrate cycle (TCA cycle)
459	A0A0J5Q4K6	Citrate cycle (TCA cycle)
460	A0A0J5Q4K6	Glycine, serine and threonine metabolism
461	A0A0J5Q4K6	Glycolysis / Gluconeogenesis
462	A0A0J5Q4K6	Glyoxylate and dicarboxylate metabolism
463	A0A0J5Q4K6	Propanoate metabolism
464	A0A0J5Q4K6	Pyruvate metabolism
465	A0A0J5Q4K6	Valine, leucine and isoleucine degradation
466	A0A0J5PNK4	Citrate cycle (TCA cycle)
467	A0A0J5PNK4	Propanoate metabolism
468	A0A0J5PGQ9	Cyanoamino acid metabolism
469	A0A0J5PGQ9	Starch and sucrose metabolism
470	A0A0J5PZT3	Cyanoamino acid metabolism
471	A0A0J5PZT3	Glycine, serine and threonine metabolism
472	A0A0J5PZT3	Glyoxylate and dicarboxylate metabolism
473	A0A0J5PZT3	Methane metabolism
474	A0A0J5PZT3	One carbon pool by folate
475	A0A0J5PYX9	Cyanoamino acid metabolism
476	A0A0J5PYX9	Glycine, serine and threonine metabolism
477	A0A0J5PYX9	Glyoxylate and dicarboxylate metabolism
478	A0A0J5PYX9	Methane metabolism
479	A0A0J5PYX9	One carbon pool by folate
480	A0A0J5SJ64	Cyanoamino acid metabolism
481	A0A0J5SJ64	Starch and sucrose metabolism
482	A0A0J5PIB4	Cyanoamino acid metabolism
483	A0A0J5PIB4	Starch and sucrose metabolism
484	A0A0J5Q018	Cyanoamino acid metabolism
485	A0A0J5Q018	Glyoxylate and dicarboxylate metabolism
486	A0A0J5Q018	Nitrogen metabolism
487	A0A0J5PUU1	Cyanoamino acid metabolism
488	A0A0J5PUU1	Starch and sucrose metabolism
489	A0A0J5PIZ9	Cyanoamino acid metabolism
490	A0A0J5PIZ9	Starch and sucrose metabolism
491	A0A0J5Q2T9	Cyanoamino acid metabolism
492	A0A0J5Q2T9	Starch and sucrose metabolism
493	A0A0J5T0Y2	Cyanoamino acid metabolism
494	A0A0J5T0Y2	Starch and sucrose metabolism
495	A0A0J5PKL5	Cyanoamino acid metabolism
496	A0A0J5PKL5	Starch and sucrose metabolism
497	A0A0J5PKB4	Cyanoamino acid metabolism
498	A0A0J5PKB4	Starch and sucrose metabolism
499	A0A0J5SR71	Cyanoamino acid metabolism
500	A0A0J5SR71	Starch and sucrose metabolism
501	A0A0J5PRS7	Cyanoamino acid metabolism
502	A0A0J5PRS7	Starch and sucrose metabolism
503	A0A0J5T0N9	Cyanoamino acid metabolism
504	A0A0J5T0N9	Nitrogen metabolism
505	A0A0J5T0N9	Tryptophan metabolism
506	A0A0J5PI79	Cyanoamino acid metabolism
507	A0A0J5PI79	Glutathione metabolism
508	A0A0J5PI79	Taurine and hypotaurine metabolism
509	A0A0J5PM17	Cyanoamino acid metabolism
510	A0A0J5PM17	Glutathione metabolism
511	A0A0J5PM17	Taurine and hypotaurine metabolism
512	A0A0J5PWY7	Cysteine and methionine metabolism
513	A0A0J5PWY7	Glycine, serine and threonine metabolism
514	A0A0J5PWY7	Lysine biosynthesis
515	A0A0J5PYH6	Cysteine and methionine metabolism
516	A0A0J5PYH6	Lysine biosynthesis
517	A0A0J5PYH6	Phenylalanine metabolism
518	A0A0J5PYH6	Phenylalanine, tyrosine and tryptophan biosynthesis
519	A0A0J5PYH6	Tryptophan metabolism
520	A0A0J5PYH6	Tyrosine metabolism
521	A0A0J5PYH6	Ubiquinone and other terpenoid-quinone biosynthesis
522	A0A0J5PVM7	Cysteine and methionine metabolism
523	A0A0J5PVM7	Glycine, serine and threonine metabolism
524	A0A0J5PVM7	Lysine biosynthesis
525	A0A0J5PVM7	Monobactam biosynthesis
526	A0A0J5PVM7	Pyruvate metabolism
527	A0A0J5PR65	Cysteine and methionine metabolism
528	A0A0J5PR65	Sulfur metabolism
529	A0A0J5PR33	Cysteine and methionine metabolism
530	A0A0J5PR33	Sulfur metabolism
531	A0A0J5Q0B6	Cysteine and methionine metabolism
532	A0A0J5PVQ9	Cysteine and methionine metabolism
533	A0A0J5PVQ9	Selenocompound metabolism
534	A0A0J5PVQ9	Sulfur metabolism
535	A0A0J5PZU4	Cysteine and methionine metabolism
536	A0A0J5PZU4	Glycine, serine and threonine metabolism
537	A0A0J5Q0V8	Cysteine and methionine metabolism
538	A0A0J5PMG9	Cysteine and methionine metabolism
539	A0A0J5PMG9	Sulfur metabolism
540	A0A0J5PRM6	Cysteine and methionine metabolism
541	A0A0J5PRM6	Glutathione metabolism
542	A0A0J5PKR8	Cysteine and methionine metabolism
543	A0A0J5PKR8	Sulfur metabolism
544	A0A0J5Q036	Cysteine and methionine metabolism
545	A0A0J5PJB6	Cysteine and methionine metabolism
546	A0A0J5PJB6	Glycine, serine and threonine metabolism
547	A0A0J5PJB6	Selenocompound metabolism
548	A0A0J5SE88	Cysteine and methionine metabolism
549	A0A0J5Q5X5	Cysteine and methionine metabolism
550	A0A0J5PF83	Cysteine and methionine metabolism
551	A0A0J5PFJ6	Cysteine and methionine metabolism
552	A0A0J5PFJ6	Selenocompound metabolism
553	A0A0J5PJM4	Cysteine and methionine metabolism
554	A0A0J5PJM4	Selenocompound metabolism
555	A0A0J5SK20	Cysteine and methionine metabolism
556	A0A0J5SK20	Pantothenate and CoA biosynthesis
557	A0A0J5SK20	Valine, leucine and isoleucine biosynthesis
558	A0A0J5SK20	Valine, leucine and isoleucine degradation
559	A0A0J5PKK2	Cysteine and methionine metabolism
560	A0A0J5PKK2	Glycine, serine and threonine metabolism
561	A0A0J5PKK2	Valine, leucine and isoleucine biosynthesis
562	A0A0J5PN10	Cysteine and methionine metabolism
563	A0A0J5PN10	Selenocompound metabolism
564	A0A0J5SQW8	Cysteine and methionine metabolism
565	A0A0J5SQW8	Glutathione metabolism
566	A0A0J5PTL2	Cysteine and methionine metabolism
567	A0A0J5PTL2	Glutathione metabolism
568	A0A0J5PD67	Cysteine and methionine metabolism
569	A0A0J5PD67	Pantothenate and CoA biosynthesis
570	A0A0J5PD67	Valine, leucine and isoleucine biosynthesis
571	A0A0J5PD67	Valine, leucine and isoleucine degradation
572	A0A0J5Q114	Cysteine and methionine metabolism
573	A0A0J5SGM6	Ether lipid metabolism
574	A0A0J5SGM6	Glycerophospholipid metabolism
575	A0A0J5Q009	Ether lipid metabolism
576	A0A0J5Q009	Glycerophospholipid metabolism
577	A0A0J5PVP1	Ether lipid metabolism
578	A0A0J5PVP1	Glycerophospholipid metabolism
579	A0A0J5PVP1	Phosphonate and phosphinate metabolism
580	A0A0J5PVP1	Ribosome
581	A0A0J5Q0J9	Ether lipid metabolism
582	A0A0J5Q0J9	Glycerophospholipid metabolism
583	A0A0J5PPQ5	Ether lipid metabolism
584	A0A0J5PPQ5	Glycerophospholipid metabolism
585	A0A0J5PPQ5	Inositol phosphate metabolism
586	A0A0J5PYS4	Fatty acid biosynthesis
587	A0A0J5PYS4	Fatty acid degradation
588	A0A0J5PYS4	Peroxisome
589	A0A0J5PV46	Fatty acid biosynthesis
590	A0A0J5PV46	Fatty acid degradation
591	A0A0J5PV46	Peroxisome
592	A0A0J5Q2I5	Fatty acid biosynthesis
593	A0A0J5Q2I5	Propanoate metabolism
594	A0A0J5Q2I5	Pyruvate metabolism
595	A0A0J5PW55	Fatty acid biosynthesis
596	A0A0J5ST36	Fatty acid biosynthesis
597	A0A0J5PHY4	Fatty acid degradation
598	A0A0J5PHY4	alpha-Linolenic acid metabolism
599	A0A0J5PHY4	Peroxisome
600	A0A0J5PHY4	Fatty acid degradation
601	A0A0J5PHY4	alpha-Linolenic acid metabolism
602	A0A0J5PHY4	Peroxisome
603	A0A0J5PHV1	Fatty acid degradation
604	A0A0J5PHV1	Valine, leucine and isoleucine degradation
605	A0A0J5PHV1	alpha-Linolenic acid metabolism
606	A0A0J5PHV1	Peroxisome
607	A0A0J5PZV2	Fatty acid degradation
608	A0A0J5PZV2	Lysine degradation
609	A0A0J5PZV2	Tryptophan metabolism
610	A0A0J5SRZ5	Fatty acid degradation
611	A0A0J5SRZ5	Tryptophan metabolism
612	A0A0J5PL51	Fatty acid degradation
613	A0A0J5PL51	Valine, leucine and isoleucine degradation
614	A0A0J5PL51	alpha-Linolenic acid metabolism
615	A0A0J5PL51	Peroxisome
616	A0A0J5PI44	Fatty acid degradation
617	A0A0J5PI44	Glycolysis / Gluconeogenesis
618	A0A0J5PI44	Tyrosine metabolism
619	A0A0J5PKP6	Fatty acid degradation
620	A0A0J5PKP6	Glycolysis / Gluconeogenesis
621	A0A0J5PKP6	Tyrosine metabolism
622	A0A0J5Q4C9	Fatty acid degradation
623	A0A0J5Q4C9	Glycolysis / Gluconeogenesis
624	A0A0J5Q4C9	Methane metabolism
625	A0A0J5Q4C9	Tyrosine metabolism
626	A0A0J5SEC8	Fatty acid degradation
627	A0A0J5SEC8	Peroxisome
628	A0A0J5PUN7	Fatty acid degradation
629	A0A0J5PUN7	Propanoate metabolism
630	A0A0J5PUN7	Valine, leucine and isoleucine degradation
631	A0A0J5PUN7	beta-Alanine metabolism
632	A0A0J5PIU1	Fatty acid degradation
633	A0A0J5PIU1	Propanoate metabolism
634	A0A0J5PIU1	Valine, leucine and isoleucine degradation
635	A0A0J5PIU1	beta-Alanine metabolism
636	A0A0J5PHU0	Fatty acid elongation
637	A0A0J5SQV8	Fatty acid elongation
638	A0A0J5Q1U7	Fatty acid elongation
639	A0A0J5Q047	Fatty acid elongation
640	A0A0J5SSD6	Folate biosynthesis
641	A0A0J5Q128	Folate biosynthesis
642	A0A0J5Q128	Riboflavin metabolism
643	A0A0J5PQV6	Folate biosynthesis
644	A0A0J5PR25	Folate biosynthesis
645	A0A0J5SSG4	Folate biosynthesis
646	A0A0J5PPX0	Folate biosynthesis
647	A0A0J5PPX0	Thiamine metabolism
648	A0A0J5PY21	Folate biosynthesis
649	A0A0J5SWB3	Folate biosynthesis
650	A0A0J5SWB3	One carbon pool by folate
651	A0A0J5PYC3	Folate biosynthesis
652	A0A0J5PYC3	One carbon pool by folate
653	A0A0J5SYG5	Fructose and mannose metabolism
654	A0A0J5SYG5	Glycolysis / Gluconeogenesis
655	A0A0J5SYG5	Inositol phosphate metabolism
656	A0A0J5PZ82	Fructose and mannose metabolism
657	A0A0J5SVW5	Fructose and mannose metabolism
658	A0A0J5SVW5	Glycolysis / Gluconeogenesis
659	A0A0J5SVW5	Inositol phosphate metabolism
660	A0A0J5PU37	Fructose and mannose metabolism
661	A0A0J5PU37	Glycolysis / Gluconeogenesis
662	A0A0J5PU37	Methane metabolism
663	A0A0J5PU37	Pentose phosphate pathway
664	A0A0J5PJ55	Fructose and mannose metabolism
665	A0A0J5T0S8	Fructose and mannose metabolism
666	A0A0J5PWL0	Fructose and mannose metabolism
667	A0A0J5PWL0	Glycolysis / Gluconeogenesis
668	A0A0J5PWL0	Methane metabolism
669	A0A0J5PWL0	Pentose phosphate pathway
670	A0A0J5PWB6	Fructose and mannose metabolism
671	A0A0J5PJH6	Fructose and mannose metabolism
672	A0A0J5PSM2	Fructose and mannose metabolism
673	A0A0J5PSM2	Galactose metabolism
674	A0A0J5PSM2	Glycolysis / Gluconeogenesis
675	A0A0J5PSM2	Methane metabolism
676	A0A0J5PSM2	Pentose phosphate pathway
677	A0A0J5SGB0	Fructose and mannose metabolism
678	A0A0J5PHH6	Fructose and mannose metabolism
679	A0A0J5PGM5	Fructose and mannose metabolism
680	A0A0J5PGM5	Glycolysis / Gluconeogenesis
681	A0A0J5PGM5	Methane metabolism
682	A0A0J5PGM5	Pentose phosphate pathway
683	A0A0J5PY30	Fructose and mannose metabolism
684	A0A0J5Q1D6	Fructose and mannose metabolism
685	A0A0J5Q1D6	Glycerolipid metabolism
686	A0A0J5Q1D6	Methane metabolism
687	A0A0J5PTJ9	Fructose and mannose metabolism
688	A0A0J5PK24	Fructose and mannose metabolism
689	A0A0J5SGP0	Fructose and mannose metabolism
690	A0A0J5PFD9	Fructose and mannose metabolism
691	A0A0J5PT12	Fructose and mannose metabolism
692	A0A0J5PT12	Pentose and glucuronate interconversions
693	A0A0J5PIS5	Fructose and mannose metabolism
694	A0A0J5PIS5	Pentose and glucuronate interconversions
695	A0A0J5SD97	Galactose metabolism
696	A0A0J5SD97	Starch and sucrose metabolism
697	A0A0J5PGE8	Galactose metabolism
698	A0A0J5PGE8	Starch and sucrose metabolism
699	A0A0J5PI42	Galactose metabolism
700	A0A0J5PI42	Glycerolipid metabolism
701	A0A0J5PI42	Glycosphingolipid biosynthesis - globo and isoglobo series
702	A0A0J5PI42	Sphingolipid metabolism
703	A0A0J5PK09	Galactose metabolism
704	A0A0J5PK09	Glycerolipid metabolism
705	A0A0J5PK09	Glycosphingolipid biosynthesis - globo and isoglobo series
706	A0A0J5PK09	Sphingolipid metabolism
707	A0A0J5PN47	Galactose metabolism
708	A0A0J5PN47	Glycerolipid metabolism
709	A0A0J5PN47	Glycosphingolipid biosynthesis - globo and isoglobo series
710	A0A0J5PN47	Sphingolipid metabolism
711	A0A0J5PR28	Galactose metabolism
712	A0A0J5PR28	Glycerolipid metabolism
713	A0A0J5PR28	Glycosphingolipid biosynthesis - globo and isoglobo series
714	A0A0J5PR28	Sphingolipid metabolism
715	A0A0J5PNV8	Galactose metabolism
716	A0A0J5PNV8	Glycerolipid metabolism
717	A0A0J5PNV8	Glycosphingolipid biosynthesis - globo and isoglobo series
718	A0A0J5PNV8	Sphingolipid metabolism
719	A0A0J5PGU0	Galactose metabolism
720	A0A0J5PGU0	Sphingolipid metabolism
721	A0A0J5PYP8	Galactose metabolism
722	A0A0J5PYP8	Glycolysis / Gluconeogenesis
723	A0A0J5PTV0	Galactose metabolism
724	A0A0J5PTV0	Glycolysis / Gluconeogenesis
725	A0A0J5SX07	Galactose metabolism
726	A0A0J5SX07	Starch and sucrose metabolism
727	A0A0J5Q5A8	Galactose metabolism
728	A0A0J5Q5A8	Sphingolipid metabolism
729	A0A0J5SGS9	Galactose metabolism
730	A0A0J5SGS9	Starch and sucrose metabolism
731	A0A0J5SYQ5	Galactose metabolism
732	A0A0J5SYQ5	Sphingolipid metabolism
733	A0A0J5PIA6	Glutathione metabolism
734	A0A0J5PII8	Glutathione metabolism
735	A0A0J5SRN8	Glutathione metabolism
736	A0A0J5Q1N6	Glutathione metabolism
737	A0A0J5PGY5	Glutathione metabolism
738	A0A0J5PDB4	Glutathione metabolism
739	A0A0J5PDB4	Purine metabolism
740	A0A0J5PDB4	Pyrimidine metabolism
741	A0A0J5PUX4	Glutathione metabolism
742	A0A0J5Q5Q0	Glutathione metabolism
743	A0A0J5Q5Q0	Pentose phosphate pathway
744	A0A0J5Q025	Glutathione metabolism
745	A0A0J5Q4B0	Glutathione metabolism
746	A0A0J5PZ50	Glutathione metabolism
747	A0A0J5PZ50	Pentose phosphate pathway
748	A0A0J5SLA2	Glycerolipid metabolism
749	A0A0J5SLA2	Glycine, serine and threonine metabolism
750	A0A0J5SLA2	Glyoxylate and dicarboxylate metabolism
751	A0A0J5PYQ6	Glycerolipid metabolism
752	A0A0J5PZK8	Glycerolipid metabolism
753	A0A0J5PY40	Glycerolipid metabolism
754	A0A0J5PY40	Glycolysis / Gluconeogenesis
755	A0A0J5PY40	Pentose and glucuronate interconversions
756	A0A0J5PDE6	Glycerolipid metabolism
757	A0A0J5PGM8	Glycerolipid metabolism
758	A0A0J5PGM8	Glycerophospholipid metabolism
759	A0A0J5PZ41	Glycerolipid metabolism
760	A0A0J5PZ41	Glycerophospholipid metabolism
761	A0A0J5PGN9	Glycerolipid metabolism
762	A0A0J5PXE8	Glycerolipid metabolism
763	A0A0J5PKW5	Glycerolipid metabolism
764	A0A0J5PHC4	Glycerolipid metabolism
765	A0A0J5PPC6	Glycerophospholipid metabolism
766	A0A0J5PPC6	MAPK signaling pathway - yeast
767	A0A0J5PH63	Glycerophospholipid metabolism
768	A0A0J5PTJ6	Glycerophospholipid metabolism
769	A0A0J5SC01	Glycerophospholipid metabolism
770	A0A0J5PK23	Glycerophospholipid metabolism
771	A0A0J5Q6U9	Glycerophospholipid metabolism
772	A0A0J5PP12	Glycerophospholipid metabolism
773	A0A0J5PDH7	Glycerophospholipid metabolism
774	A0A0J5PDH7	Phosphonate and phosphinate metabolism
775	A0A0J5Q0Q6	Glycerophospholipid metabolism
776	A0A0J5PH96	Glycerophospholipid metabolism
777	A0A0J5PIE6	Glycerophospholipid metabolism
778	A0A0J5PT72	Glycerophospholipid metabolism
779	A0A0J5Q016	Glycerophospholipid metabolism
780	A0A0J5PGD4	Glycerophospholipid metabolism
781	A0A0J5Q0K6	Glycerophospholipid metabolism
782	A0A0J5SP13	Glycine, serine and threonine metabolism
783	A0A0J5SP13	Methane metabolism
784	A0A0J5PRD0	Glycine, serine and threonine metabolism
785	A0A0J5PRD0	Methane metabolism
786	A0A0J5PFF5	Glycine, serine and threonine metabolism
787	A0A0J5PFF5	Methane metabolism
788	A0A0J5PFF5	Vitamin B6 metabolism
789	A0A0J5PUT4	Glycine, serine and threonine metabolism
790	A0A0J5PUT4	Vitamin B6 metabolism
791	A0A0J5PT44	Glycine, serine and threonine metabolism
792	A0A0J5PT44	Pyrimidine metabolism
793	A0A0J5SI65	Glycine, serine and threonine metabolism
794	A0A0J5SI65	Glycine, serine and threonine metabolism
795	A0A0J5PI27	Glycine, serine and threonine metabolism
796	A0A0J5PI27	Phenylalanine metabolism
797	A0A0J5PI27	Tyrosine metabolism
798	A0A0J5PI27	beta-Alanine metabolism
799	A0A0J5SPH0	Glycine, serine and threonine metabolism
800	A0A0J5SPH0	Phenylalanine metabolism
801	A0A0J5SPH0	Tyrosine metabolism
802	A0A0J5SPH0	beta-Alanine metabolism
803	A0A0J5PIU4	Glycine, serine and threonine metabolism
804	A0A0J5PIU4	Lysine degradation
805	A0A0J5PIU4	Peroxisome
806	A0A0J5PE32	Glycine, serine and threonine metabolism
807	A0A0J5PE32	Valine, leucine and isoleucine biosynthesis
808	A0A0J5PD89	Glycine, serine and threonine metabolism
809	A0A0J5PD89	Valine, leucine and isoleucine biosynthesis
810	A0A0J5Q2B9	Glycine, serine and threonine metabolism
811	A0A0J5SZV2	Glycine, serine and threonine metabolism
812	A0A0J5SZV2	Lysine degradation
813	A0A0J5SZV2	Peroxisome
814	A0A0J5PYK6	Glycine, serine and threonine metabolism
815	A0A0J5PYK6	Phenylalanine, tyrosine and tryptophan biosynthesis
816	A0A0J5SBZ4	Glycine, serine and threonine metabolism
817	A0A0J5SBZ4	Phenylalanine metabolism
818	A0A0J5SBZ4	Tyrosine metabolism
819	A0A0J5SBZ4	beta-Alanine metabolism
820	A0A0J5PS33	Glycine, serine and threonine metabolism
821	A0A0J5PQN3	Glycine, serine and threonine metabolism
822	A0A0J5PQN3	Phenylalanine metabolism
823	A0A0J5PQN3	Tyrosine metabolism
824	A0A0J5PQN3	beta-Alanine metabolism
825	A0A0J5PW10	Glycine, serine and threonine metabolism
826	A0A0J5PW10	Glyoxylate and dicarboxylate metabolism
827	A0A0J5PR58	Glycine, serine and threonine metabolism
828	A0A0J5PR58	Glyoxylate and dicarboxylate metabolism
829	A0A0J5PUR2	Glycine, serine and threonine metabolism
830	A0A0J5PUR2	Glycolysis / Gluconeogenesis
831	A0A0J5PUR2	Methane metabolism
832	A0A0J5SX50	Glycine, serine and threonine metabolism
833	A0A0J5Q0U1	Glycine, serine and threonine metabolism
834	A0A0J5Q0U1	Glyoxylate and dicarboxylate metabolism
835	A0A0J5Q0U1	One carbon pool by folate
836	A0A0J5SN57	Glycine, serine and threonine metabolism
837	A0A0J5SS80	Glycine, serine and threonine metabolism
838	A0A0J5PVA3	Glycine, serine and threonine metabolism
839	A0A0J5PVQ1	Glycine, serine and threonine metabolism
840	A0A0J5PVQ1	Methane metabolism
841	A0A0J5SRI8	Glycolysis / Gluconeogenesis
842	A0A0J5PG18	Glycolysis / Gluconeogenesis
843	A0A0J5PFZ9	Glycolysis / Gluconeogenesis
844	A0A0J5SNF4	Glycolysis / Gluconeogenesis
845	A0A0J5Q2C9	Glycolysis / Gluconeogenesis
846	A0A0J5Q2C9	Purine metabolism
847	A0A0J5Q2C9	Pyruvate metabolism
848	A0A0J5PWH3	Glycolysis / Gluconeogenesis
849	A0A0J5PU96	Glycolysis / Gluconeogenesis
850	A0A0J5Q217	Glycolysis / Gluconeogenesis
851	A0A0J5Q217	Methane metabolism
852	A0A0J5PHV6	Glycolysis / Gluconeogenesis
853	A0A0J5PHV6	Methane metabolism
854	A0A0J5PHV6	Propanoate metabolism
855	A0A0J5PHV6	Pyruvate metabolism
856	A0A0J5PFW6	Glycolysis / Gluconeogenesis
857	A0A0J5PFW6	Histidine metabolism
858	A0A0J5PFW6	Phenylalanine metabolism
859	A0A0J5PFW6	Tyrosine metabolism
860	A0A0J5PFW6	beta-Alanine metabolism
861	A0A0J5Q3P9	Glycosaminoglycan degradation
862	A0A0J5SEP1	Glyoxylate and dicarboxylate metabolism
863	A0A0J5PIY7	Glyoxylate and dicarboxylate metabolism
864	A0A0J5PEU1	Glyoxylate and dicarboxylate metabolism
865	A0A0J5Q511	Glyoxylate and dicarboxylate metabolism
866	A0A0J5PDC4	Glyoxylate and dicarboxylate metabolism
867	A0A0J5SEH6	Glyoxylate and dicarboxylate metabolism
868	A0A0J5SEH6	Pyruvate metabolism
869	A0A0J5PFS8	Glyoxylate and dicarboxylate metabolism
870	A0A0J5PFS8	MAPK signaling pathway - yeast
871	A0A0J5PFS8	Tryptophan metabolism
872	A0A0J5PFS8	Peroxisome
873	A0A0J5PFG2	Glyoxylate and dicarboxylate metabolism
874	A0A0J5PFG2	Methane metabolism
875	A0A0J5PPI2	Glyoxylate and dicarboxylate metabolism
876	A0A0J5PPI2	MAPK signaling pathway - yeast
877	A0A0J5PPI2	Tryptophan metabolism
878	A0A0J5PPI2	Peroxisome
879	A0A0J5PWW6	Glyoxylate and dicarboxylate metabolism
880	A0A0J5PWW6	MAPK signaling pathway - yeast
881	A0A0J5PWW6	Tryptophan metabolism
882	A0A0J5PWW6	Peroxisome
883	A0A0J5T075	Glyoxylate and dicarboxylate metabolism
884	A0A0J5T075	One carbon pool by folate
885	A0A0J5SXJ3	Histidine metabolism
886	A0A0J5SL09	Histidine metabolism
887	A0A0J5PL88	Histidine metabolism
888	A0A0J5Q0S8	Histidine metabolism
889	A0A0J5Q0S8	Phenylalanine metabolism
890	A0A0J5Q0S8	Phenylalanine, tyrosine and tryptophan biosynthesis
891	A0A0J5Q0S8	Tyrosine metabolism
892	A0A0J5PNQ3	Histidine metabolism
893	A0A0J5PRW7	Histidine metabolism
894	A0A0J5PYK3	Histidine metabolism
895	A0A0J5PEV2	Inositol phosphate metabolism
896	A0A0J5Q041	Inositol phosphate metabolism
897	A0A0J5Q135	Inositol phosphate metabolism
898	A0A0J5SWY9	Inositol phosphate metabolism
899	A0A0J5PYH9	Inositol phosphate metabolism
900	A0A0J5PYH9	MAPK signaling pathway - yeast
901	A0A0J5PYH9	Mitophagy - yeast
902	A0A0J5PDS9	Inositol phosphate metabolism
903	A0A0J5SFW5	Inositol phosphate metabolism
904	A0A0J5SCN9	Inositol phosphate metabolism
905	A0A0J5SG67	Inositol phosphate metabolism
906	A0A0J5SG67	MAPK signaling pathway - yeast
907	A0A0J5PSA4	Inositol phosphate metabolism
908	A0A0J5Q1B5	Inositol phosphate metabolism
909	A0A0J5Q4V7	Inositol phosphate metabolism
910	A0A0J5Q4V7	Propanoate metabolism
911	A0A0J5Q4V7	Valine, leucine and isoleucine degradation
912	A0A0J5Q4V7	beta-Alanine metabolism
913	A0A0J5Q3J3	Inositol phosphate metabolism
914	A0A0J5PGJ6	Linoleic acid metabolism
915	A0A0J5PY15	Linoleic acid metabolism
916	A0A0J5PYB7	Lipoic acid metabolism
917	A0A0J5SSP4	Lipoic acid metabolism
918	A0A0J5PP93	Lysine biosynthesis
919	A0A0J5SDC1	Lysine biosynthesis
920	A0A0J5SDC1	Pyruvate metabolism
921	A0A0J5PW60	Lysine biosynthesis
922	A0A0J5PEL4	Lysine biosynthesis
923	A0A0J5PEL4	Lysine degradation
924	A0A0J5Q6J2	Lysine biosynthesis
925	A0A0J5PEK7	Lysine biosynthesis
926	A0A0J5PY62	Lysine biosynthesis
927	A0A0J5PY62	Lysine degradation
928	A0A0J5PPG1	Lysine degradation
929	A0A0J5PW27	MAPK signaling pathway - yeast
930	A0A0J5PNC9	MAPK signaling pathway - yeast
931	A0A0J5PJE5	MAPK signaling pathway - yeast
932	A0A0J5Q4D9	MAPK signaling pathway - yeast
933	A0A0J5PVZ9	MAPK signaling pathway - yeast
934	A0A0J5PVZ9	Mitophagy - yeast
935	A0A0J5PZT8	MAPK signaling pathway - yeast
936	A0A0J5PW23	MAPK signaling pathway - yeast
937	A0A0J5Q6F2	MAPK signaling pathway - yeast
938	A0A0J5Q1K1	MAPK signaling pathway - yeast
939	A0A0J5Q4B9	MAPK signaling pathway - yeast
940	A0A0J5Q4B9	Mitophagy - yeast
941	A0A0J5Q6P9	MAPK signaling pathway - yeast
942	A0A0J5PNI5	MAPK signaling pathway - yeast
943	A0A0J5SDI8	MAPK signaling pathway - yeast
944	A0A0J5PKX5	MAPK signaling pathway - yeast
945	A0A0J5PKX5	Mitophagy - yeast
946	A0A0J5T0H6	MAPK signaling pathway - yeast
947	A0A0J5PZU8	MAPK signaling pathway - yeast
948	A0A0J5SP43	MAPK signaling pathway - yeast
949	A0A0J5PNP2	MAPK signaling pathway - yeast
950	A0A0J5PFA7	MAPK signaling pathway - yeast
951	A0A0J5PRK9	MAPK signaling pathway - yeast
952	A0A0J5PZ40	MAPK signaling pathway - yeast
953	A0A0J5Q6E5	MAPK signaling pathway - yeast
954	A0A0J5Q3D4	MAPK signaling pathway - yeast
955	A0A0J5PFC9	MAPK signaling pathway - yeast
956	A0A0J5PMP0	MAPK signaling pathway - yeast
957	A0A0J5PS38	MAPK signaling pathway - yeast
958	A0A0J5PHQ4	MAPK signaling pathway - yeast
959	A0A0J5Q6X9	MAPK signaling pathway - yeast
960	A0A0J5Q6X9	Starch and sucrose metabolism
961	A0A0J5PVX2	MAPK signaling pathway - yeast
962	A0A0J5Q231	MAPK signaling pathway - yeast
963	A0A0J5PN63	Mannose type O-glycan biosynthesis
964	A0A0J5PZQ6	Mannose type O-glycan biosynthesis
965	A0A0J5PX97	Mannose type O-glycan biosynthesis
966	A0A0J5PWG9	Methane metabolism
967	A0A0J5PJ05	Mitophagy - yeast
968	A0A0J5PHZ5	Mitophagy - yeast
969	A0A0J5Q1B9	Mitophagy - yeast
970	A0A0J5PNF7	Mitophagy - yeast
971	A0A0J5PEF9	Mitophagy - yeast
972	A0A0J5SIT7	Mitophagy - yeast
973	A0A0J5Q133	Mitophagy - yeast
974	A0A0J5Q133	Ribosome biogenesis in eukaryotes
975	A0A0J5PQM1	Mitophagy - yeast
976	A0A0J5PN26	Mitophagy - yeast
977	A0A0J5PN26	Ribosome biogenesis in eukaryotes
978	A0A0J5PYD5	Monobactam biosynthesis
979	A0A0J5PYD5	Purine metabolism
980	A0A0J5PYD5	Selenocompound metabolism
981	A0A0J5PYD5	Sulfur metabolism
982	A0A0J5SEB3	N-Glycan biosynthesis
983	A0A0J5PDT2	N-Glycan biosynthesis
984	A0A0J5Q252	N-Glycan biosynthesis
985	A0A0J5Q252	Various types of N-glycan biosynthesis
986	A0A0J5PND4	N-Glycan biosynthesis
987	A0A0J5SNS9	N-Glycan biosynthesis
988	A0A0J5PJA7	N-Glycan biosynthesis
989	A0A0J5Q1G3	N-Glycan biosynthesis
990	A0A0J5PUM2	N-Glycan biosynthesis
991	A0A0J5Q0B1	N-Glycan biosynthesis
992	A0A0J5PSI0	N-Glycan biosynthesis
993	A0A0J5Q0N8	N-Glycan biosynthesis
994	A0A0J5Q0N8	Various types of N-glycan biosynthesis
995	A0A0J5PGS1	Nicotinate and nicotinamide metabolism
996	A0A0J5PF99	Nicotinate and nicotinamide metabolism
997	A0A0J5PF99	Purine metabolism
998	A0A0J5PF99	Pyrimidine metabolism
999	A0A0J5PVP5	Nicotinate and nicotinamide metabolism
1000	A0A0J5SNR7	Nicotinate and nicotinamide metabolism
1001	A0A0J5PRC9	Nicotinate and nicotinamide metabolism
1002	A0A0J5PRC9	Peroxisome
1003	A0A0J5PHR6	Nicotinate and nicotinamide metabolism
1004	A0A0J5PLB7	Nicotinate and nicotinamide metabolism
1005	A0A0J5PLB7	Pyrimidine metabolism
1006	A0A0J5PQR6	Nicotinate and nicotinamide metabolism
1007	A0A0J5PNZ1	Nicotinate and nicotinamide metabolism
1008	A0A0J5Q2T7	Nicotinate and nicotinamide metabolism
1009	A0A0J5PIT7	Nitrogen metabolism
1010	A0A0J5PHX1	Nitrogen metabolism
1011	A0A0J5PJX9	Nitrogen metabolism
1012	A0A0J5SUB2	Nitrogen metabolism
1013	A0A0J5Q1W4	Nitrogen metabolism
1014	A0A0J5PHX5	One carbon pool by folate
1015	A0A0J5SHU9	One carbon pool by folate
1016	A0A0J5PNM5	One carbon pool by folate
1017	A0A0J5PNM5	Pyrimidine metabolism
1018	A0A0J5SCL0	One carbon pool by folate
1019	A0A0J5SCL0	Purine metabolism
1020	A0A0J5SS29	One carbon pool by folate
1021	A0A0J5PYL3	One carbon pool by folate
1022	A0A0J5PYL3	Purine metabolism
1023	A0A0J5SVU5	One carbon pool by folate
1024	A0A0J5PUW0	One carbon pool by folate
1025	A0A0J5SIY5	Oxidative phosphorylation
1026	A0A0J5Q2V6	Oxidative phosphorylation
1027	A0A0J5PQL3	Oxidative phosphorylation
1028	A0A0J5PQK8	Oxidative phosphorylation
1029	A0A0J5Q0V2	Oxidative phosphorylation
1030	A0A0J5PLX2	Oxidative phosphorylation
1031	A0A0J5SNI5	Oxidative phosphorylation
1032	A0A0J5PZ17	Oxidative phosphorylation
1033	A0A0J5PRL0	Oxidative phosphorylation
1034	A0A0J5PZJ9	Oxidative phosphorylation
1035	A0A0J5Q470	Oxidative phosphorylation
1036	A0A0J5PTK0	Oxidative phosphorylation
1037	A0A0J5SW82	Oxidative phosphorylation
1038	A0A0J5PWJ2	Oxidative phosphorylation
1039	A0A0J5PYD1	Oxidative phosphorylation
1040	A0A0J5SNT3	Oxidative phosphorylation
1041	A0A0J5PV72	Oxidative phosphorylation
1042	A0A0J5SHU1	Oxidative phosphorylation
1043	A0A0J5PZ87	Oxidative phosphorylation
1044	A0A0J5PV62	Oxidative phosphorylation
1045	A0A0J5PHT1	Oxidative phosphorylation
1046	A0A0J5SNY8	Oxidative phosphorylation
1047	A0A0J5Q3A9	Oxidative phosphorylation
1048	A0A0J5PHQ6	Oxidative phosphorylation
1049	A0A0J5PVZ4	Oxidative phosphorylation
1050	A0A0J5PVL4	Oxidative phosphorylation
1051	A0A0J5PJR5	Oxidative phosphorylation
1052	A0A0J5PDC0	Oxidative phosphorylation
1053	A0A0J5PHX6	Oxidative phosphorylation
1054	A0A0J5PSQ5	Oxidative phosphorylation
1055	A0A0J5PR78	Oxidative phosphorylation
1056	A0A0J5PFZ8	Oxidative phosphorylation
1057	A0A0J5PGE4	Oxidative phosphorylation
1058	A0A0J5SV86	Oxidative phosphorylation
1059	A0A0J5PLU5	Oxidative phosphorylation
1060	A0A0J5SBV4	Oxidative phosphorylation
1061	A0A0J5PM61	Oxidative phosphorylation
1062	A0A0J5SDI5	Oxidative phosphorylation
1063	A0A0J5PSR3	Oxidative phosphorylation
1064	A0A0J5PPW1	Oxidative phosphorylation
1065	A0A0J5PY66	Oxidative phosphorylation
1066	A0A0J5PWD0	Oxidative phosphorylation
1067	A0A0J5PKY8	Oxidative phosphorylation
1068	A0A0J5PR24	Oxidative phosphorylation
1069	A0A0J5Q705	Oxidative phosphorylation
1070	A0A0J5PEM4	Oxidative phosphorylation
1071	A0A0J5PIP9	Oxidative phosphorylation
1072	A0A0J5Q6Y9	Oxidative phosphorylation
1073	A0A0J5PFU8	Oxidative phosphorylation
1074	A0A0J5PUB0	Oxidative phosphorylation
1075	A0A0J5PJ19	Pantothenate and CoA biosynthesis
1076	A0A0J5PQ44	Pantothenate and CoA biosynthesis
1077	A0A0J5PQ44	Valine, leucine and isoleucine biosynthesis
1078	A0A0J5PWS8	Pantothenate and CoA biosynthesis
1079	A0A0J5PWS8	beta-Alanine metabolism
1080	A0A0J5SBW0	Pantothenate and CoA biosynthesis
1081	A0A0J5SBW0	Valine, leucine and isoleucine biosynthesis
1082	A0A0J5SV38	Pantothenate and CoA biosynthesis
1083	A0A0J5SV38	Valine, leucine and isoleucine biosynthesis
1084	A0A0J5Q0M2	Pantothenate and CoA biosynthesis
1085	A0A0J5Q0M2	Valine, leucine and isoleucine biosynthesis
1086	A0A0J5PWQ8	Penicillin and cephalosporin biosynthesis
1087	A0A0J5SXL4	Pentose and glucuronate interconversions
1088	A0A0J5Q7C1	Pentose and glucuronate interconversions
1089	A0A0J5PU61	Pentose and glucuronate interconversions
1090	A0A0J5SRC6	Pentose and glucuronate interconversions
1091	A0A0J5PM40	Pentose and glucuronate interconversions
1092	A0A0J5PK74	Pentose and glucuronate interconversions
1093	A0A0J5PJ79	Pentose and glucuronate interconversions
1094	A0A0J5Q021	Pentose and glucuronate interconversions
1095	A0A0J5PF60	Pentose and glucuronate interconversions
1096	A0A0J5PMF3	Pentose and glucuronate interconversions
1097	A0A0J5PL15	Pentose and glucuronate interconversions
1098	A0A0J5PJW0	Pentose and glucuronate interconversions
1099	A0A0J5PLR9	Pentose and glucuronate interconversions
1100	A0A0J5SQ22	Pentose and glucuronate interconversions
1101	A0A0J5PJM2	Pentose and glucuronate interconversions
1102	A0A0J5PY18	Pentose and glucuronate interconversions
1103	A0A0J5Q2A5	Pentose and glucuronate interconversions
1104	A0A0J5PPW2	Pentose and glucuronate interconversions
1105	A0A0J5PY47	Pentose and glucuronate interconversions
1106	A0A0J5PY47	Pentose phosphate pathway
1107	A0A0J5PZN6	Pentose phosphate pathway
1108	A0A0J5SNJ8	Pentose phosphate pathway
1109	A0A0J5PTP1	Pentose phosphate pathway
1110	A0A0J5PTP1	Purine metabolism
1111	A0A0J5Q7F5	Pentose phosphate pathway
1112	A0A0J5PLY5	Pentose phosphate pathway
1113	A0A0J5PGT2	Pentose phosphate pathway
1114	A0A0J5PGT2	Pentose phosphate pathway
1115	A0A0J5SDE5	Pentose phosphate pathway
1116	A0A0J5SDE5	Purine metabolism
1117	A0A0J5Q103	Pentose phosphate pathway
1118	A0A0J5SPW8	Pentose phosphate pathway
1119	A0A0J5Q2G8	Phenylalanine metabolism
1120	A0A0J5SXY9	Phenylalanine metabolism
1121	A0A0J5SXY9	Ubiquinone and other terpenoid-quinone biosynthesis
1122	A0A0J5PUE5	Phenylalanine metabolism
1123	A0A0J5PPI7	Phenylalanine metabolism
1124	A0A0J5PPI7	Tryptophan metabolism
1125	A0A0J5PPI7	Tyrosine metabolism
1126	A0A0J5PRA4	Phenylalanine metabolism
1127	A0A0J5PRA4	Tyrosine metabolism
1128	A0A0J5PRA4	Ubiquinone and other terpenoid-quinone biosynthesis
1129	A0A0J5SIH2	Phenylalanine metabolism
1130	A0A0J5SIH2	Tryptophan metabolism
1131	A0A0J5PGJ3	Phenylalanine, tyrosine and tryptophan biosynthesis
1132	A0A0J5PGJ3	Phenylalanine, tyrosine and tryptophan biosynthesis
1133	A0A0J5PDT9	Phenylalanine, tyrosine and tryptophan biosynthesis
1134	A0A0J5Q244	Phenylalanine, tyrosine and tryptophan biosynthesis
1135	A0A0J5PKC8	Phenylalanine, tyrosine and tryptophan biosynthesis
1136	A0A0J5PRK7	Phenylalanine, tyrosine and tryptophan biosynthesis
1137	A0A0J5PI29	Phenylalanine, tyrosine and tryptophan biosynthesis
1138	A0A0J5Q5E1	Phenylalanine, tyrosine and tryptophan biosynthesis
1139	A0A0J5Q3S1	Phenylalanine, tyrosine and tryptophan biosynthesis
1140	A0A0J5Q1H9	Phenylalanine, tyrosine and tryptophan biosynthesis
1141	A0A0J5PRP9	Phenylalanine, tyrosine and tryptophan biosynthesis
1142	A0A0J5PQH0	Phenylalanine, tyrosine and tryptophan biosynthesis
1143	A0A0J5SG89	Phenylalanine, tyrosine and tryptophan biosynthesis
1144	A0A0J5PRE6	Porphyrin and chlorophyll metabolism
1145	A0A0J5SUJ6	Porphyrin and chlorophyll metabolism
1146	A0A0J5PS96	Porphyrin and chlorophyll metabolism
1147	A0A0J5PWW3	Porphyrin and chlorophyll metabolism
1148	A0A0J5Q2Q4	Porphyrin and chlorophyll metabolism
1149	A0A0J5PLI1	Porphyrin and chlorophyll metabolism
1150	A0A0J5PVY3	Porphyrin and chlorophyll metabolism
1151	A0A0J5SDC4	Porphyrin and chlorophyll metabolism
1152	A0A0J5SGN3	Porphyrin and chlorophyll metabolism
1153	A0A0J5SQR3	Porphyrin and chlorophyll metabolism
1154	A0A0J5Q2R3	Propanoate metabolism
1155	A0A0J5Q2R3	Valine, leucine and isoleucine degradation
1156	A0A0J5PFU7	Propanoate metabolism
1157	A0A0J5Q2S0	Propanoate metabolism
1158	A0A0J5SDM3	Propanoate metabolism
1159	A0A0J5SDM3	Valine, leucine and isoleucine degradation
1160	A0A0J5SDM3	Propanoate metabolism
1161	A0A0J5SDM3	Valine, leucine and isoleucine degradation
1162	A0A0J5PTT9	Propanoate metabolism
1163	A0A0J5PTT9	Valine, leucine and isoleucine degradation
1164	A0A0J5Q4L5	Propanoate metabolism
1165	A0A0J5Q4L5	Valine, leucine and isoleucine degradation
1166	A0A0J5Q4L5	beta-Alanine metabolism
1167	A0A0J5PHD3	Purine metabolism
1168	A0A0J5PHD3	Pyrimidine metabolism
1169	A0A0J5SG11	Purine metabolism
1170	A0A0J5SG11	Pyrimidine metabolism
1171	A0A0J5PHH0	Purine metabolism
1172	A0A0J5PHH0	Pyrimidine metabolism
1173	A0A0J5PFB8	Purine metabolism
1174	A0A0J5SZD0	Purine metabolism
1175	A0A0J5SZD0	Pyrimidine metabolism
1176	A0A0J5PJ56	Purine metabolism
1177	A0A0J5PJ56	Pyrimidine metabolism
1178	A0A0J5PY00	Purine metabolism
1179	A0A0J5PY00	Pyrimidine metabolism
1180	A0A0J5PYL8	Purine metabolism
1181	A0A0J5PYL8	Pyrimidine metabolism
1182	A0A0J5PQZ1	Purine metabolism
1183	A0A0J5PQZ1	Pyrimidine metabolism
1184	A0A0J5PLR7	Purine metabolism
1185	A0A0J5PLR7	Pyrimidine metabolism
1186	A0A0J5PLV2	Purine metabolism
1187	A0A0J5PLV2	Pyrimidine metabolism
1188	A0A0J5SRX7	Purine metabolism
1189	A0A0J5SRX7	Pyrimidine metabolism
1190	A0A0J5PE20	Purine metabolism
1191	A0A0J5PE20	Pyrimidine metabolism
1192	A0A0J5Q4M9	Purine metabolism
1193	A0A0J5Q4M9	Pyrimidine metabolism
1194	A0A0J5PV22	Purine metabolism
1195	A0A0J5PV22	Pyrimidine metabolism
1196	A0A0J5PTV8	Purine metabolism
1197	A0A0J5PR61	Purine metabolism
1198	A0A0J5PR61	Pyrimidine metabolism
1199	A0A0J5PLW5	Purine metabolism
1200	A0A0J5PVZ5	Purine metabolism
1201	A0A0J5PWV3	Purine metabolism
1202	A0A0J5SXH8	Purine metabolism
1203	A0A0J5PLU3	Purine metabolism
1204	A0A0J5SVR8	Purine metabolism
1205	A0A0J5PRY4	Purine metabolism
1206	A0A0J5Q544	Purine metabolism
1207	A0A0J5Q544	Pyrimidine metabolism
1208	A0A0J5Q0M5	Purine metabolism
1209	A0A0J5Q0M5	Pyrimidine metabolism
1210	A0A0J5PRD4	Purine metabolism
1211	A0A0J5PVT5	Purine metabolism
1212	A0A0J5PQ18	Purine metabolism
1213	A0A0J5SIA1	Purine metabolism
1214	A0A0J5PZH7	Purine metabolism
1215	A0A0J5PZH7	Sulfur metabolism
1216	A0A0J5Q839	Purine metabolism
1217	A0A0J5PTW5	Purine metabolism
1218	A0A0J5SC31	Purine metabolism
1219	A0A0J5Q4M2	Purine metabolism
1220	A0A0J5PQJ9	Purine metabolism
1221	A0A0J5SQQ8	Purine metabolism
1222	A0A0J5SQQ8	Thiamine metabolism
1223	A0A0J5SJP5	Purine metabolism
1224	A0A0J5SJP5	Thiamine metabolism
1225	A0A0J5PHA4	Purine metabolism
1226	A0A0J5Q378	Purine metabolism
1227	A0A0J5PL42	Pyrimidine metabolism
1228	A0A0J5PZQ1	Pyrimidine metabolism
1229	A0A0J5PZ55	Pyrimidine metabolism
1230	A0A0J5PRN1	Pyrimidine metabolism
1231	A0A0J5PZ31	Pyrimidine metabolism
1232	A0A0J5PLF5	Pyrimidine metabolism
1233	A0A0J5SNS5	Pyrimidine metabolism
1234	A0A0J5PRM9	Pyrimidine metabolism
1235	A0A0J5PXW3	Pyrimidine metabolism
1236	A0A0J5PNA6	Pyrimidine metabolism
1237	A0A0J5PM88	Pyrimidine metabolism
1238	A0A0J5PMR5	Pyrimidine metabolism
1239	A0A0J5PDB8	Pyrimidine metabolism
1240	A0A0J5PLN6	Pyruvate metabolism
1241	A0A0J5Q3Y0	Pyruvate metabolism
1242	A0A0J5PR37	Pyruvate metabolism
1243	A0A0J5SEQ2	Pyruvate metabolism
1244	A0A0J5PJ26	Pyruvate metabolism
1245	A0A0J5PJ26	Valine, leucine and isoleucine biosynthesis
1246	A0A0J5Q5P1	Pyruvate metabolism
1247	A0A0J5PWA2	Pyruvate metabolism
1248	A0A0J5PFF4	Pyruvate metabolism
1249	A0A0J5Q4M0	Pyruvate metabolism
1250	A0A0J5PN98	Pyruvate metabolism
1251	A0A0J5PY14	Pyruvate metabolism
1252	A0A0J5PPF6	Riboflavin metabolism
1253	A0A0J5PR66	Riboflavin metabolism
1254	A0A0J5PR66	Thiamine metabolism
1255	A0A0J5Q740	Riboflavin metabolism
1256	A0A0J5Q0A1	Riboflavin metabolism
1257	A0A0J5Q0A1	Thiamine metabolism
1258	A0A0J5PMR3	Riboflavin metabolism
1259	A0A0J5SNA4	Riboflavin metabolism
1260	A0A0J5SNA4	Thiamine metabolism
1261	A0A0J5PQV7	Riboflavin metabolism
1262	A0A0J5Q203	Riboflavin metabolism
1263	A0A0J5SJN2	Riboflavin metabolism
1264	A0A0J5SJN2	Thiamine metabolism
1265	A0A0J5SFA2	Riboflavin metabolism
1266	A0A0J5SFA2	Thiamine metabolism
1267	A0A0J5PML5	Ribosome
1268	A0A0J5Q1B0	Ribosome
1269	A0A0J5PL23	Ribosome
1270	A0A0J5SES8	Ribosome
1271	A0A0J5PWN4	Ribosome
1272	A0A0J5PMS6	Ribosome
1273	A0A0J5SP09	Ribosome
1274	A0A0J5PI55	Ribosome
1275	A0A0J5PIC6	Ribosome
1276	A0A0J5PG72	Ribosome
1277	A0A0J5PVC2	Ribosome
1278	A0A0J5Q2F8	Ribosome
1279	A0A0J5PY89	Ribosome
1280	A0A0J5PUM3	Ribosome
1281	A0A0J5Q4L0	Ribosome
1282	A0A0J5Q3E1	Ribosome
1283	A0A0J5PW25	Ribosome
1284	A0A0J5PZL2	Ribosome
1285	A0A0J5PFX8	Ribosome
1286	A0A0J5Q0I9	Ribosome
1287	A0A0J5PPE4	Ribosome
1288	A0A0J5PFB1	Ribosome
1289	A0A0J5PQU3	Ribosome
1290	A0A0J5PH66	Ribosome
1291	A0A0J5SUE8	Ribosome
1292	A0A0J5PUX0	Ribosome
1293	A0A0J5PHN3	Ribosome
1294	A0A0J5PZB2	Ribosome
1295	A0A0J5SJR5	Ribosome
1296	A0A0J5PZA0	Ribosome
1297	A0A0J5PNA9	Ribosome
1298	A0A0J5PWQ1	Ribosome
1299	A0A0J5SFG0	Ribosome
1300	A0A0J5SSL7	Ribosome
1301	A0A0J5PDI6	Ribosome
1302	A0A0J5Q372	Ribosome
1303	A0A0J5PWT3	Ribosome
1304	A0A0J5Q040	Ribosome
1305	A0A0J5SP98	Ribosome
1306	A0A0J5PPZ6	Ribosome
1307	A0A0J5SJ77	Ribosome
1308	A0A0J5PZF5	Ribosome
1309	A0A0J5PXS3	Ribosome
1310	A0A0J5Q4C3	Ribosome
1311	A0A0J5PUR5	Ribosome
1312	A0A0J5SC65	Ribosome
1313	A0A0J5PYY4	Ribosome
1314	A0A0J5PWJ7	Ribosome
1315	A0A0J5PKX4	Ribosome
1316	A0A0J5SE11	Ribosome
1317	A0A0J5SCL3	Ribosome
1318	A0A0J5SSM2	Ribosome
1319	A0A0J5PKR9	Ribosome
1320	A0A0J5PKX2	Ribosome
1321	A0A0J5Q0Q0	Ribosome
1322	A0A0J5Q775	Ribosome
1323	A0A0J5PRP3	Ribosome
1324	A0A0J5PGY0	Ribosome
1325	A0A0J5PPX1	Ribosome
1326	A0A0J5PEH6	Ribosome
1327	A0A0J5Q263	Ribosome
1328	A0A0J5SIW4	Ribosome
1329	A0A0J5PL40	Ribosome
1330	A0A0J5Q747	Ribosome
1331	A0A0J5PYP0	Ribosome
1332	A0A0J5PYR2	Ribosome
1333	A0A0J5PKY1	Ribosome
1334	A0A0J5SKL4	Ribosome
1335	A0A0J5SDE1	Ribosome
1336	A0A0J5PT54	Ribosome
1337	A0A0J5PT86	Ribosome
1338	A0A0J5SRH5	Ribosome
1339	A0A0J5Q1D2	Ribosome
1340	A0A0J5Q3X4	Ribosome
1341	A0A0J5Q7Z8	Ribosome
1342	A0A0J5PVQ2	Ribosome
1343	A0A0J5PHH4	Ribosome
1344	A0A0J5PXU7	Ribosome
1345	A0A0J5SW28	Ribosome
1346	A0A0J5PMU8	Ribosome
1347	A0A0J5PT67	Ribosome
1348	A0A0J5PFT3	Ribosome
1349	A0A0J5PPQ1	Ribosome
1350	A0A0J5Q2N9	Ribosome
1351	A0A0J5PPZ3	Ribosome
1352	A0A0J5SW01	Ribosome
1353	A0A0J5PP11	Ribosome
1354	A0A0J5PNR7	Ribosome
1355	A0A0J5SRP5	Ribosome
1356	A0A0J5PYN7	Ribosome
1357	A0A0J5PJ89	Ribosome biogenesis in eukaryotes
1358	A0A0J5PX50	Ribosome biogenesis in eukaryotes
1359	A0A0J5PUE2	Ribosome biogenesis in eukaryotes
1360	A0A0J5Q0T7	Ribosome biogenesis in eukaryotes
1361	A0A0J5PDJ5	Ribosome biogenesis in eukaryotes
1362	A0A0J5Q092	Ribosome biogenesis in eukaryotes
1363	A0A0J5PXN8	Ribosome biogenesis in eukaryotes
1364	A0A0J5PQV0	Ribosome biogenesis in eukaryotes
1365	A0A0J5PX76	Ribosome biogenesis in eukaryotes
1366	A0A0J5SRD2	Ribosome biogenesis in eukaryotes
1367	A0A0J5PQV3	Ribosome biogenesis in eukaryotes
1368	A0A0J5PV14	Ribosome biogenesis in eukaryotes
1369	A0A0J5SK76	Ribosome biogenesis in eukaryotes
1370	A0A0J5PEH7	Ribosome biogenesis in eukaryotes
1371	A0A0J5Q4T3	Ribosome biogenesis in eukaryotes
1372	A0A0J5Q1D8	Ribosome biogenesis in eukaryotes
1373	A0A0J5Q0Z9	Ribosome biogenesis in eukaryotes
1374	A0A0J5PNE9	Ribosome biogenesis in eukaryotes
1375	A0A0J5PYE3	Ribosome biogenesis in eukaryotes
1376	A0A0J5PRL9	Ribosome biogenesis in eukaryotes
1377	A0A0J5PR85	Ribosome biogenesis in eukaryotes
1378	A0A0J5Q427	Ribosome biogenesis in eukaryotes
1379	A0A0J5Q441	Ribosome biogenesis in eukaryotes
1380	A0A0J5PUS6	Ribosome biogenesis in eukaryotes
1381	A0A0J5PRV4	Ribosome biogenesis in eukaryotes
1382	A0A0J5Q751	Ribosome biogenesis in eukaryotes
1383	A0A0J5PUV2	Ribosome biogenesis in eukaryotes
1384	A0A0J5SXE8	Selenocompound metabolism
1385	A0A0J5PX70	Selenocompound metabolism
1386	A0A0J5PJJ0	Sesquiterpenoid and triterpenoid biosynthesis
1387	A0A0J5PJJ0	Steroid biosynthesis
1388	A0A0J5PW97	Sphingolipid metabolism
1389	A0A0J5PFC6	Sphingolipid metabolism
1390	A0A0J5SJ00	Sphingolipid metabolism
1391	A0A0J5Q0S0	Sphingolipid metabolism
1392	A0A0J5SCD2	Sphingolipid metabolism
1393	A0A0J5SIC1	Sphingolipid metabolism
1394	A0A0J5Q5T8	Sphingolipid metabolism
1395	A0A0J5PSU6	Starch and sucrose metabolism
1396	A0A0J5PGL9	Starch and sucrose metabolism
1397	A0A0J5Q4A6	Starch and sucrose metabolism
1398	A0A0J5PU19	Starch and sucrose metabolism
1399	A0A0J5PL36	Starch and sucrose metabolism
1400	A0A0J5SSZ9	Starch and sucrose metabolism
1401	A0A0J5SKK6	Starch and sucrose metabolism
1402	A0A0J5SNJ4	Starch and sucrose metabolism
1403	A0A0J5T0L7	Starch and sucrose metabolism
1404	A0A0J5Q462	Starch and sucrose metabolism
1405	A0A0J5SY08	Starch and sucrose metabolism
1406	A0A0J5Q504	Starch and sucrose metabolism
1407	A0A0J5PZA7	Starch and sucrose metabolism
1408	A0A0J5PQ40	Starch and sucrose metabolism
1409	A0A0J5Q822	Starch and sucrose metabolism
1410	A0A0J5PLL3	Starch and sucrose metabolism
1411	A0A0J5PGC6	Starch and sucrose metabolism
1412	A0A0J5PWN2	Starch and sucrose metabolism
1413	A0A0J5PPL9	Starch and sucrose metabolism
1414	A0A0J5Q2D2	Starch and sucrose metabolism
1415	A0A0J5Q5E2	Starch and sucrose metabolism
1416	A0A0J5Q3H6	Starch and sucrose metabolism
1417	A0A0J5PGG2	Starch and sucrose metabolism
1418	A0A0J5SZ56	Starch and sucrose metabolism
1419	A0A0J5Q6Q1	Starch and sucrose metabolism
1420	A0A0J5PV91	Starch and sucrose metabolism
1421	A0A0J5PM12	Starch and sucrose metabolism
1422	A0A0J5PEF2	Starch and sucrose metabolism
1423	A0A0J5Q019	Starch and sucrose metabolism
1424	A0A0J5PP44	Staurosporine biosynthesis
1425	A0A0J5PP39	Staurosporine biosynthesis
1426	A0A0J5PKR7	Staurosporine biosynthesis
1427	A0A0J5PK85	Staurosporine biosynthesis
1428	A0A0J5PJX1	Steroid biosynthesis
1429	A0A0J5SCC8	Steroid biosynthesis
1430	A0A0J5SDJ3	Steroid biosynthesis
1431	A0A0J5PLR4	Steroid biosynthesis
1432	A0A0J5PS41	Steroid biosynthesis
1433	A0A0J5PRJ0	Steroid biosynthesis
1434	A0A0J5Q2A8	Steroid biosynthesis
1435	A0A0J5PLK8	Steroid biosynthesis
1436	A0A0J5Q255	Sulfur metabolism
1437	A0A0J5Q620	Sulfur metabolism
1438	A0A0J5Q713	Sulfur metabolism
1439	A0A0J5PR12	Sulfur metabolism
1440	A0A0J5PKJ8	Sulfur metabolism
1441	A0A0J5Q6L6	Terpenoid backbone biosynthesis
1442	A0A0J5PUX6	Terpenoid backbone biosynthesis
1443	A0A0J5PDS8	Terpenoid backbone biosynthesis
1444	A0A0J5PWP9	Terpenoid backbone biosynthesis
1445	A0A0J5SCL7	Terpenoid backbone biosynthesis
1446	A0A0J5SCL7	Peroxisome
1447	A0A0J5PMV7	Terpenoid backbone biosynthesis
1448	A0A0J5PGX5	Terpenoid backbone biosynthesis
1449	A0A0J5PUK7	Terpenoid backbone biosynthesis
1450	A0A0J5PDK0	Terpenoid backbone biosynthesis
1451	A0A0J5PQN2	Thiamine metabolism
1452	A0A0J5Q6T3	Thiamine metabolism
1453	A0A0J5PYM0	Thiamine metabolism
1454	A0A0J5PTH1	Thiamine metabolism
1455	A0A0J5PZ07	Thiamine metabolism
1456	A0A0J5PH84	Tryptophan metabolism
1457	A0A0J5PEK3	Tryptophan metabolism
1458	A0A0J5Q6I7	Tryptophan metabolism
1459	A0A0J5PLX6	Tryptophan metabolism
1460	A0A0J5SW10	Tryptophan metabolism
1461	A0A0J5SKL9	Tyrosine metabolism
1462	A0A0J5STF5	Tyrosine metabolism
1463	A0A0J5SMZ9	Tyrosine metabolism
1464	A0A0J5PN15	Tyrosine metabolism
1465	A0A0J5PME6	Tyrosine metabolism
1466	A0A0J5Q7G6	Tyrosine metabolism
1467	A0A0J5SXF2	Ubiquinone and other terpenoid-quinone biosynthesis
1468	A0A0J5PLZ8	Ubiquinone and other terpenoid-quinone biosynthesis
1469	A0A0J5Q2V2	Ubiquinone and other terpenoid-quinone biosynthesis
1470	A0A0J5Q1X4	Valine, leucine and isoleucine biosynthesis
1471	A0A0J5Q7H9	Valine, leucine and isoleucine degradation
1472	A0A0J5PU54	Valine, leucine and isoleucine degradation
1473	A0A0J5PS86	Valine, leucine and isoleucine degradation
1474	A0A0J5PW66	Valine, leucine and isoleucine degradation
1475	A0A0J5PSU5	Valine, leucine and isoleucine degradation
1476	A0A0J5PSH8	Valine, leucine and isoleucine degradation
1477	A0A0J5Q5W8	Various types of N-glycan biosynthesis
1478	A0A0J5PSR8	Vitamin B6 metabolism
1479	A0A0J5PWW1	Vitamin B6 metabolism
1480	A0A0J5PP57	Vitamin B6 metabolism
1481	A0A0J5PSB9	Vitamin B6 metabolism
1482	A0A0J5PLK3	Peroxisome
1483	A0A0J5PSK0	Peroxisome
1484	A0A0J5PI00	Peroxisome
1485	A0A0J5Q3T6	Peroxisome
1486	A0A0J5PH37	Peroxisome
1487	A0A0J5PGI9	Peroxisome
1488	A0A0J5SPH8	Peroxisome
1489	A0A0J5PLS2	Peroxisome
1490	A0A0J5PUY7	Peroxisome
1491	A0A0J5PYQ0	Peroxisome
1492	A0A0J5PUD0	Peroxisome
1493	A0A0J5PYQ9	Peroxisome
1494	A0A0J5Q6Y5	Peroxisome
1495	A0A0J5ST99	Peroxisome
1496	A0A0J5PYT4	Peroxisome
1497	A0A0J5PMY4	Peroxisome
1498	A0A0J5PXW8	Peroxisome
1499	A0A0J5PF02	Peroxisome

## Sheet: node-Met
	Subject_id	Dim(met)	Met/Reference
0	A0A0J5PYX8	9.9875	0.25
1	A0A0J5PFR2	10.4525	0.06
3	A0A0J5PVL3	10.8275	-0.12
4	A0A0J5PMF1	9.145	0
5	A0A0J5Q5M2	10.1275	0.34
6	A0A0J5PFX3	9.9475	-0.03
7	A0A0J5PX25	11.1825	0.43
8	A0A0J5SYU2	9.22	0.11
9	A0A0J5PUD2	9.4975	-0.03
10	A0A0J5Q858	9.5425	0
11	A0A0J5PRB3	10.96	0.24
12	A0A0J5PW89	9.8675	0.34
13	A0A0J5PVK3	9.6475	0.11
14	A0A0J5Q2U5	9.68	0.21
15	A0A0J5T051	9.4725	0.06
16	A0A0J5PLG3	10.905	0.12
17	A0A0J5PDC7	9.9275	0.3
18	A0A0J5SXD9	8.995	0.01
19	A0A0J5PFL4	9.585	-0.01
20	A0A0J5SW53	10.4725	0.33
21	A0A0J5PVE2	8.7025	0.22
22	A0A0J5PNF3	9.695	0.14
23	A0A0J5PH33	9.37	0.27
24	A0A0J5Q842	10.51	0.27
25	A0A0J5PDB2	10.2625	0.26
26	A0A0J5SDB7	10.4525	0.49
27	A0A0J5PVM1	9.6875	-0.1
28	A0A0J5Q3K5	10.0325	0.14
29	A0A0J5PIG3	9.9175	0.11
30	A0A0J5PL46	10.115	-0.13
31	A0A0J5PI71	10.8375	0.05
32	A0A0J5PRN9	10.2525	0.08
33	A0A0J5PNT7	9.7775	-0.01
34	A0A0J5Q5K8	8.72	-0.06
35	A0A0J5PYJ4	9.4	0.09
36	A0A0J5Q2U0	9.0025	-0.01
37	A0A0J5PKG8	9.39	0
39	A0A0J5PEM5	11.1525	0.28
40	A0A0J5SV51	10.2075	0.12
41	A0A0J5PM58	9.85	-0.02
43	A0A0J5PNR4	10.3075	-0.06
44	A0A0J5PK41	10.7525	0.12
46	A0A0J5PQ76	8.805	0.07
47	A0A0J5Q140	11.6725	0.24
48	A0A0J5SUS4	9.5975	0.08
49	A0A0J5PSJ2	9.57	0.17
50	A0A0J5SYW3	10.1675	0.07
51	A0A0J5PJT8	10.2	0.07
52	A0A0J5PND6	7.965	0.18
53	A0A0J5SRD4	9.54	0.24
54	A0A0J5SWV3	9.03	0.12
55	A0A0J5SW43	10.1925	0.31
56	A0A0J5PU23	10.8325	0.25
57	A0A0J5PNX4	11.4925	-0.59
58	A0A0J5PSJ4	12.15	-0.33
59	A0A0J5SG28	10.3025	0.11
60	A0A0J5Q487	9.605	0.36
61	A0A0J5PI52	9.5525	0.22
62	A0A0J5SX59	9.02	-0.03
63	A0A0J5PVA6	10.89	0.37
65	A0A0J5PU74	10.195	-0.01
66	A0A0J5SDV4	9.4225	-0.1
67	A0A0J5SQA8	10.4725	0.16
68	A0A0J5PR13	10.995	0.21
69	A0A0J5SJ25	8.685	0.28
70	A0A0J5SRT2	10.005	0.42
71	A0A0J5PZ06	8.67	-0.01
72	A0A0J5SGH4	8.235	0.17
73	A0A0J5PHR2	9.61	0.18
74	A0A0J5PUR8	9.72	-0.03
75	A0A0J5PU67	10.65	0.21
76	A0A0J5PU31	11.2375	-0.13
77	A0A0J5Q2U3	10.4025	0.29
78	A0A0J5PZV4	9.2275	0.18
79	A0A0J5PU58	11.22	0.38
80	A0A0J5Q1I4	10.4675	-0.13
81	A0A0J5PRM8	9.06	0.13
82	A0A0J5PPU9	10.6125	-0.25
83	A0A0J5SNU1	6.8775	0.18
84	A0A0J5SWN6	9.805	0.09
85	A0A0J5PTZ5	10.68	-0.14
86	A0A0J5Q579	10.485	0.04
87	A0A0J5PHW0	9.5075	-0.13
88	A0A0J5SQ14	11.055	0.16
89	A0A0J5Q351	9.515	0.07
90	A0A0J5PT46	10.76	0.23
91	A0A0J5Q1V0	10.4625	0.27
92	A0A0J5PG20	9.015	0
93	A0A0J5Q2Q7	9.0575	0.52
94	A0A0J5PRG6	10.245	0.02
95	A0A0J5PMP4	9.545	-0.32
96	A0A0J5PJ32	10.38	0.29
97	A0A0J5PW88	9.245	0.16
98	A0A0J5Q318	10.225	0.13
99	A0A0J5PHJ6	10.11	-0.06
100	A0A0J5Q3I8	10.05	0.32
101	A0A0J5PH80	9.745	0.08
103	A0A0J5Q2G1	9.3275	0.38
104	A0A0J5PLM1	10.3475	-0.04
105	A0A0J5SFH6	8.9075	0.46
106	A0A0J5PI13	9.5175	-0.04
107	A0A0J5Q325	9.3725	0.44
108	A0A0J5SCF2	10.6325	0.35
109	A0A0J5PS07	9.685	-0.03
110	A0A0J5Q6E8	9.945	-0.18
111	A0A0J5PM26	9.6325	0.22
112	A0A0J5PVB2	8.235	-0.08
113	A0A0J5PVJ1	9.1525	0
114	A0A0J5PRS1	9.7225	-0.22
115	A0A0J5PVW1	7.08	-0.16
116	A0A0J5PTI3	12.8725	0.04
117	A0A0J5PY94	9.5275	-0.43
118	A0A0J5PQT3	9.235	-0.01
119	A0A0J5PVX5	9.79	0.05
120	A0A0J5Q3A7	9.965	0.02
121	A0A0J5PU80	8.6375	-0.29
122	A0A0J5PVR8	6.9525	0.06
123	A0A0J5PWI2	10.4575	0.14
124	A0A0J5SQM2	8.875	-0.17
125	A0A0J5Q483	9.705	0.22
126	A0A0J5PVW8	9.8925	0.02
127	A0A0J5SFJ7	9.8175	-0.32
128	A0A0J5PHV5	7.7025	-0.13
129	A0A0J5PFG8	9.3075	0.01
130	A0A0J5PZB8	10.09	-0.16
131	A0A0J5SQG5	9.185	0.01
132	A0A0J5Q6V6	6.92	0.07
133	A0A0J5Q426	9.3975	-0.08
134	A0A0J5PYG8	8.745	-0.05
135	A0A0J5PRN6	9.4325	-0.09
136	A0A0J5PZZ2	9.96	0.12
137	A0A0J5PYD8	6.505	0.15
138	A0A0J5PE77	9.5375	0.04
139	A0A0J5Q7I7	7.63	0.03
140	A0A0J5PWZ1	9.0875	-0.15
141	A0A0J5Q364	9.57	0.1
142	A0A0J5PYL1	6.7575	0.06
143	A0A0J5PHT7	9.465	0.09
144	A0A0J5PG49	9.1025	0.22
145	A0A0J5PXL4	7.6525	0.13
146	A0A0J5PT50	9.74	0.08
147	A0A0J5Q167	10.365	0.07
148	A0A0J5PKQ8	7.1	0.03
149	A0A0J5PWR6	10.13	0.08
150	A0A0J5Q5Y5	7.7025	-0.25
151	A0A0J5PPD8	10.45	0.2
152	A0A0J5PYQ2	7.275	-0.18
153	A0A0J5Q1I3	9.865	-0.06
154	A0A0J5PYD9	6.8375	0.25
155	A0A0J5SYI0	8.16	0.08
156	A0A0J5PDY9	10.12	0.2
157	A0A0J5PFM5	9.3175	0.22
158	A0A0J5PQP0	8.865	0.15
159	A0A0J5PYV4	12.995	0.35
160	A0A0J5PXI1	10.0525	0.55
161	A0A0J5PXA6	9.4325	0.24
162	A0A0J5PYL9	10.3575	-0.02
163	A0A0J5PRW4	11.205	0.27
164	A0A0J5PYC7	12.3175	0.15
165	A0A0J5Q3N8	9.99	0.27
166	A0A0J5ST49	9.75	0.27
167	A0A0J5PJI6	11.5275	0.52
168	A0A0J5Q7E1	9.64	0.7
169	A0A0J5PSK5	9.675	-0.08
170	A0A0J5PUH2	6.595	0.09
171	A0A0J5PN31	10.2075	0.38
172	A0A0J5Q3D9	10.6475	0.18
173	A0A0J5PKI4	7.955	-0.18
174	A0A0J5SFF5	9.7925	0.23
175	A0A0J5Q866	8.695	0.44
176	A0A0J5PEN3	9.2625	0.14
177	A0A0J5Q240	11.65	0.29
178	A0A0J5SH00	9.5925	0
179	A0A0J5PSP3	10.3	0.4
180	A0A0J5PJC2	11.0875	0.05
181	A0A0J5Q5H1	11.1675	-0.04
182	A0A0J5Q1X2	9.9675	0.11
183	A0A0J5PLJ1	9.7425	-0.09
184	A0A0J5SE17	10.345	0.34
185	A0A0J5PVK1	10.265	0.16
186	A0A0J5Q5L7	10.6325	0.12
187	A0A0J5PHV0	10.3125	-0.1
188	A0A0J5SEH0	10.1125	0.71
189	A0A0J5PV41	10.0925	0.24
190	A0A0J5PP80	7.9675	0.11
191	A0A0J5ST40	9.3925	0.22
192	A0A0J5PV58	9.87	0.21
193	A0A0J5PUW3	10.295	0.36
194	A0A0J5Q7F7	10.2725	0.33
195	A0A0J5ST22	8.9275	-0.09
196	A0A0J5T0I4	10.5075	0.29
197	A0A0J5PGW6	10.0475	0.32
198	A0A0J5PUK5	9.9675	0.21
199	A0A0J5PGP7	9.5475	0.11
200	A0A0J5Q3B6	10.455	0.31
201	A0A0J5Q4K6	11.12	0.07
202	A0A0J5PNK4	10.505	0.34
203	A0A0J5PGQ9	8.84	0.41
204	A0A0J5PZT3	10.3725	-0.01
205	A0A0J5PYX9	10.2175	0.2
206	A0A0J5SJ64	9.715	-0.25
207	A0A0J5PIB4	10.1125	0.05
208	A0A0J5Q018	10.44	0.49
209	A0A0J5PUU1	9.7975	-0.05
210	A0A0J5PIZ9	7.85	-0.12
211	A0A0J5Q2T9	10.1525	0.17
212	A0A0J5T0Y2	10.14	0.3
213	A0A0J5PKL5	10.04	0.12
214	A0A0J5PKB4	10.02	-0.27
215	A0A0J5SR71	11.03	0.33
216	A0A0J5PRS7	10.4325	0.23
217	A0A0J5T0N9	8.71	0.94
218	A0A0J5PI79	10.8675	-0.01
219	A0A0J5PM17	10.2675	0.22
220	A0A0J5PWY7	9.3225	0.2
221	A0A0J5PYH6	8.74	0.4
222	A0A0J5PVM7	10.8225	0.21
224	A0A0J5PR65	10.435	-0.08
225	A0A0J5PR33	10.18	-0.1
226	A0A0J5Q0B6	9.5025	0.22
227	A0A0J5PVQ9	9.5025	0.26
228	A0A0J5PZU4	10.355	0.39
229	A0A0J5Q0V8	10.865	0.07
230	A0A0J5PMG9	10.4175	-0.41
231	A0A0J5PRM6	10.6	0.1
232	A0A0J5PKR8	7.1875	-0.34
233	A0A0J5Q036	11.1725	0.23
234	A0A0J5PJB6	10.53	0.67
235	A0A0J5SE88	9.0975	-0.21
236	A0A0J5Q5X5	10.7025	0.24
237	A0A0J5PF83	9.7475	0.11
238	A0A0J5PFJ6	10.035	0.28
239	A0A0J5PJM4	9.4925	0.38
240	A0A0J5SK20	9.9875	0.52
241	A0A0J5PKK2	9.7825	-0.03
242	A0A0J5PN10	9.5775	0.34
243	A0A0J5SQW8	8.72	0.07
244	A0A0J5PTL2	10.7075	-0.06
245	A0A0J5PD67	9.94	0.28
246	A0A0J5Q114	9.6625	0.39
247	A0A0J5SGM6	8.46	-0.1
248	A0A0J5Q009	9.245	-0.1
249	A0A0J5PVP1	11.9825	0.34
251	A0A0J5Q0J9	8.7325	-0.05
252	A0A0J5PPQ5	10.0225	-0.03
253	A0A0J5PYS4	10.375	-0.03
254	A0A0J5PV46	9.9425	0.09
255	A0A0J5Q2I5	10.3475	0.15
256	A0A0J5PW55	9.6225	-0.02
257	A0A0J5ST36	9.2925	0.19
258	A0A0J5PHY4	9.87	0.34
260	A0A0J5PHV1	9.995	0.3
261	A0A0J5PZV2	9.5825	0.1
262	A0A0J5SRZ5	6.3875	0.02
263	A0A0J5PL51	10.015	0.63
264	A0A0J5PI44	11.24	0.56
265	A0A0J5PKP6	9.24	0.05
266	A0A0J5Q4C9	10.4625	0.48
267	A0A0J5SEC8	10.5	0.24
268	A0A0J5PUN7	10.63	0.41
269	A0A0J5PIU1	10.6425	0.22
270	A0A0J5PHU0	9.8225	0.19
271	A0A0J5SQV8	9.4725	-0.29
272	A0A0J5Q1U7	10.05	0.14
273	A0A0J5Q047	10.1425	0.18
274	A0A0J5SSD6	7.4425	0.06
275	A0A0J5Q128	8.645	0.01
276	A0A0J5PQV6	8.8	0.24
277	A0A0J5PR25	9.975	0.14
278	A0A0J5SSG4	8.5075	0.16
279	A0A0J5PPX0	9.2875	-0.02
280	A0A0J5PY21	9.465	-0.11
281	A0A0J5SWB3	7.66	-0.2
282	A0A0J5PYC3	10.1075	-0.23
283	A0A0J5SYG5	8.8425	0.42
284	A0A0J5PZ82	10.1025	0.24
285	A0A0J5SVW5	9.9725	0.15
286	A0A0J5PU37	9.7075	0.34
287	A0A0J5PJ55	9.6825	0.12
288	A0A0J5T0S8	9.9675	0.23
289	A0A0J5PWL0	8.715	0.08
290	A0A0J5PWB6	11.005	0.28
291	A0A0J5PJH6	9.5375	0.17
292	A0A0J5PSM2	8.74	0.01
293	A0A0J5SGB0	10.695	-0.02
294	A0A0J5PHH6	9.9875	0.09
295	A0A0J5PGM5	7.4375	0.3
296	A0A0J5PY30	9.6275	0.11
297	A0A0J5Q1D6	8.9675	0.04
298	A0A0J5PTJ9	8.25	-0.04
299	A0A0J5PK24	11.2275	0.25
300	A0A0J5SGP0	10.3125	0.13
301	A0A0J5PFD9	9.5125	-0.03
302	A0A0J5PT12	10.17	0
303	A0A0J5PIS5	9.61	0.1
304	A0A0J5SD97	9.39	0.06
305	A0A0J5PGE8	10	0.04
306	A0A0J5PI42	10.2625	-0.28
307	A0A0J5PK09	9.685	0.11
308	A0A0J5PN47	10.0375	0.17
309	A0A0J5PR28	10.12	0
310	A0A0J5PNV8	10.1825	0.18
311	A0A0J5PGU0	10.99	0.17
312	A0A0J5PYP8	10.4575	0.19
313	A0A0J5PTV0	11.23	-0.63
314	A0A0J5SX07	11.285	-0.39
315	A0A0J5Q5A8	9.665	-0.32
316	A0A0J5SGS9	9.0675	0.17
317	A0A0J5SYQ5	10.1625	0.27
318	A0A0J5PIA6	10.9575	0.11
319	A0A0J5PII8	9.245	0.25
320	A0A0J5SRN8	11.28	0.1
321	A0A0J5Q1N6	9.1425	-0.12
322	A0A0J5PGY5	10.195	0.22
323	A0A0J5PDB4	11.1275	0.19
324	A0A0J5PUX4	9.3325	-0.1
325	A0A0J5Q5Q0	9.7775	0.35
326	A0A0J5Q025	9.8025	-0.14
327	A0A0J5Q4B0	9.6025	0.05
328	A0A0J5PZ50	10.6575	0.16
329	A0A0J5SLA2	9.04	0.06
330	A0A0J5PYQ6	10.6775	0.18
331	A0A0J5PZK8	10.33	0.27
332	A0A0J5PY40	10.305	0.31
333	A0A0J5PDE6	10.5825	-0.19
334	A0A0J5PGM8	10.275	-0.06
335	A0A0J5PZ41	9.71	0
336	A0A0J5PGN9	9.465	0.3
337	A0A0J5PXE8	8.9225	0.37
338	A0A0J5PKW5	5.8375	0.41
339	A0A0J5PHC4	8.245	-0.02
340	A0A0J5PPC6	9.7075	-0.03
341	A0A0J5PH63	9.975	0.29
342	A0A0J5PTJ6	9.795	0.05
343	A0A0J5SC01	9.8575	-0.04
344	A0A0J5PK23	10.0825	-0.05
345	A0A0J5Q6U9	10.0725	0.28
346	A0A0J5PP12	8.32	-0.37
347	A0A0J5PDH7	8.1575	0.07
348	A0A0J5Q0Q6	7.2975	-0.05
349	A0A0J5PH96	10.2275	-0.21
350	A0A0J5PIE6	9.3575	0.21
351	A0A0J5PT72	10.2275	0.06
352	A0A0J5Q016	9.6825	0.06
353	A0A0J5PGD4	9.6675	0.13
354	A0A0J5Q0K6	9.0275	0.05
355	A0A0J5SP13	10.2375	-0.05
356	A0A0J5PRD0	9.745	0.08
357	A0A0J5PFF5	9.095	0.21
358	A0A0J5PUT4	10.295	0.33
359	A0A0J5PT44	10.84	-0.06
360	A0A0J5SI65	8.7775	0.27
362	A0A0J5PI27	7.76	0.07
363	A0A0J5SPH0	9.39	0.29
364	A0A0J5PIU4	9.5425	0.62
365	A0A0J5PE32	9.4375	0.08
366	A0A0J5PD89	9.6325	0.13
367	A0A0J5Q2B9	11.15	0.19
368	A0A0J5SZV2	9.6525	0.23
369	A0A0J5PYK6	10.2575	0.1
370	A0A0J5SBZ4	8.585	0.15
371	A0A0J5PS33	10.5375	0.25
372	A0A0J5PQN3	10.5	0.11
373	A0A0J5PW10	9.2725	-0.22
374	A0A0J5PR58	9.0825	0.1
375	A0A0J5PUR2	10.78	-0.07
376	A0A0J5SX50	8.105	-0.08
377	A0A0J5Q0U1	9.8225	-0.04
378	A0A0J5SN57	10.2175	-0.76
379	A0A0J5SS80	7.9325	0.39
380	A0A0J5PVA3	10.835	0.06
381	A0A0J5PVQ1	9.63	0.1
382	A0A0J5SRI8	7.305	0.21
383	A0A0J5PG18	8.7675	0.15
384	A0A0J5PFZ9	10.475	0.03
385	A0A0J5SNF4	10.03	0.6
386	A0A0J5Q2C9	7.5275	0.01
387	A0A0J5PWH3	10.4575	0.17
388	A0A0J5PU96	9.7275	0.07
389	A0A0J5Q217	8.65	0.31
390	A0A0J5PHV6	10.49	-0.01
391	A0A0J5PFW6	8.4425	-0.02
392	A0A0J5Q3P9	9.52	0.02
393	A0A0J5SEP1	9.755	0.28
394	A0A0J5PIY7	9.9075	0.36
395	A0A0J5PEU1	9.1325	0.03
396	A0A0J5Q511	7.9025	0.13
397	A0A0J5PDC4	10.2475	0.8
398	A0A0J5SEH6	9.7575	0.21
399	A0A0J5PFS8	9.8	0.46
400	A0A0J5PFG2	10.67	0.01
401	A0A0J5PPI2	9.87	0.19
402	A0A0J5PWW6	7.7075	0.36
403	A0A0J5T075	9.38	0.31
404	A0A0J5SXJ3	10.485	0.18
405	A0A0J5SL09	9.1975	0.14
406	A0A0J5PL88	9.9075	0.36
407	A0A0J5Q0S8	11.0475	0.09
408	A0A0J5PNQ3	11.3975	0.22
409	A0A0J5PRW7	9.8625	-0.1
410	A0A0J5PYK3	9.93	0.15
411	A0A0J5PEV2	6.7125	-0.02
412	A0A0J5Q041	9.2625	0.14
413	A0A0J5Q135	8.505	-0.13
414	A0A0J5SWY9	10.445	0.2
415	A0A0J5PYH9	8.31	0.01
416	A0A0J5PDS9	11.785	-0.21
417	A0A0J5SFW5	9.185	-0.14
418	A0A0J5SCN9	10.34	-0.08
419	A0A0J5SG67	8.92	0.33
420	A0A0J5PSA4	8.55	-0.05
421	A0A0J5Q1B5	8.61	-0.11
422	A0A0J5Q4V7	10.8775	0.3
423	A0A0J5Q3J3	10.24	0.15
424	A0A0J5PGJ6	9.56	-0.04
425	A0A0J5PY15	9.8975	0.09
426	A0A0J5PYB7	7.9725	-0.12
427	A0A0J5SSP4	8.43	0.22
428	A0A0J5PP93	9.8675	0.24
429	A0A0J5SDC1	10.145	0.11
430	A0A0J5PW60	9.3575	-0.04
431	A0A0J5PEL4	10.0925	0.23
432	A0A0J5Q6J2	10.335	-0.01
433	A0A0J5PEK7	10.2425	0.22
434	A0A0J5PY62	9.615	0.18
435	A0A0J5PPG1	8.96	-0.08
436	A0A0J5PW27	9.43	-0.11
437	A0A0J5PNC9	9.055	-0.03
438	A0A0J5PJE5	7.5825	0.23
439	A0A0J5Q4D9	9.4625	-0.03
440	A0A0J5PVZ9	9.505	-0.15
441	A0A0J5PZT8	10.105	-0.23
442	A0A0J5PW23	10.855	0.25
443	A0A0J5Q6F2	9.9325	0.08
444	A0A0J5Q1K1	10.5775	-0.21
445	A0A0J5Q4B9	9.97	0.25
446	A0A0J5Q6P9	8.2875	0.23
447	A0A0J5PNI5	10.83	0.13
448	A0A0J5SDI8	9.4775	-0.14
449	A0A0J5PKX5	10.7675	-0.41
450	A0A0J5T0H6	8.5875	0.12
451	A0A0J5PZU8	9.26	0.06
452	A0A0J5SP43	8.5025	0.04
453	A0A0J5PNP2	10.6175	-0.29
454	A0A0J5PFA7	10.29	0.16
455	A0A0J5PRK9	9.1775	0.02
456	A0A0J5PZ40	10.1025	-0.21
457	A0A0J5Q6E5	7.855	0.34
458	A0A0J5Q3D4	9.47	-0.1
459	A0A0J5PFC9	10.065	0.18
460	A0A0J5PMP0	8.6775	0.28
461	A0A0J5PS38	10.27	-0.43
462	A0A0J5PHQ4	10.5275	-0.07
463	A0A0J5Q6X9	9.0125	-0.02
464	A0A0J5PVX2	10.3875	-0.04
465	A0A0J5Q231	10.0675	0.21
466	A0A0J5PN63	10.725	0.16
467	A0A0J5PZQ6	9.9425	0.21
468	A0A0J5PX97	9.93	-0.01
469	A0A0J5PWG9	10.4925	0.05
470	A0A0J5PJ05	6.4375	-0.11
471	A0A0J5PHZ5	9.38	0.09
472	A0A0J5Q1B9	9.925	-0.16
473	A0A0J5PNF7	8.3575	-0.23
474	A0A0J5PEF9	10.595	0.03
475	A0A0J5SIT7	8.725	-0.12
476	A0A0J5Q133	9.46	-0.09
477	A0A0J5PQM1	9.4325	-0.08
478	A0A0J5PN26	9.525	0.23
479	A0A0J5PYD5	9.7125	0.1
480	A0A0J5SEB3	7.5775	0.02
481	A0A0J5PDT2	10.9725	-0.01
482	A0A0J5Q252	9.125	0.34
483	A0A0J5PND4	10.7075	0.08
484	A0A0J5SNS9	9.6925	-0.06
485	A0A0J5PJA7	9.665	-0.12
486	A0A0J5Q1G3	9.405	0
487	A0A0J5PUM2	9.33	0.05
488	A0A0J5Q0B1	10.045	0.08
489	A0A0J5PSI0	9.885	0.05
490	A0A0J5Q0N8	10.7275	0.06
491	A0A0J5PGS1	8.48	-0.05
492	A0A0J5PF99	10.495	0.29
493	A0A0J5PVP5	7.7175	0.17
494	A0A0J5SNR7	9.545	0.15
495	A0A0J5PRC9	10.9525	0.3
496	A0A0J5PHR6	11.37	-0.21
497	A0A0J5PLB7	8.685	0.39
498	A0A0J5PQR6	7.4875	-0.12
499	A0A0J5PNZ1	5.135	0.09
500	A0A0J5Q2T7	10.98	0.05
501	A0A0J5PIT7	8.195	0.17
502	A0A0J5PHX1	10.02	0.01
503	A0A0J5PJX9	11.5025	0.26
504	A0A0J5SUB2	10.25	0.35
505	A0A0J5Q1W4	10.43	0.06
506	A0A0J5PHX5	10.7725	-0.14
507	A0A0J5SHU9	9.8	-0.02
508	A0A0J5PNM5	9.1875	0.08
509	A0A0J5SCL0	9.75	0.11
510	A0A0J5SS29	8.7275	0.07
511	A0A0J5PYL3	10.18	0.15
512	A0A0J5SVU5	9.565	-0.08
513	A0A0J5PUW0	9.7325	-0.11
514	A0A0J5SIY5	9.0925	-0.24
515	A0A0J5Q2V6	9.245	0.22
516	A0A0J5PQL3	12.34	0.12
517	A0A0J5PQK8	9.2375	-0.01
518	A0A0J5Q0V2	10.445	0.05
519	A0A0J5PLX2	10.015	-0.45
520	A0A0J5SNI5	9.9625	-0.07
521	A0A0J5PZ17	11.3675	-0.2
522	A0A0J5PRL0	9.5875	0.09
523	A0A0J5PZJ9	11.2875	0.14
524	A0A0J5Q470	9.175	0.18
525	A0A0J5PTK0	9.0325	-0.24
526	A0A0J5SW82	11.7325	-0.2
527	A0A0J5PWJ2	9.9425	0.09
528	A0A0J5PYD1	8.9125	-0.13
529	A0A0J5SNT3	8.0875	0.78
530	A0A0J5PV72	8.08	0.01
531	A0A0J5SHU1	8.8975	0.2
532	A0A0J5PZ87	8.93	0.07
533	A0A0J5PV62	10.055	-0.02
534	A0A0J5PHT1	11.7325	-0.36
535	A0A0J5SNY8	10.21	0.07
536	A0A0J5Q3A9	11.54	-0.4
537	A0A0J5PHQ6	11.21	0
538	A0A0J5PVZ4	8.135	-0.11
539	A0A0J5PVL4	9.8	0.15
540	A0A0J5PJR5	9.905	0.18
541	A0A0J5PDC0	10.3125	0.16
542	A0A0J5PHX6	9.1	0.02
543	A0A0J5PSQ5	10.455	0.28
544	A0A0J5PR78	9.1175	-0.14
545	A0A0J5PFZ8	10.4	-0.23
546	A0A0J5PGE4	9.25	0.14
547	A0A0J5SV86	8.725	0.22
548	A0A0J5PLU5	8.81	-0.21
549	A0A0J5SBV4	10.4375	0.65
550	A0A0J5PM61	9.8825	0.15
551	A0A0J5SDI5	9.2125	-0.44
552	A0A0J5PSR3	9.475	0
553	A0A0J5PPW1	11.0075	-0.23
554	A0A0J5PY66	11.3	-0.05
555	A0A0J5PWD0	10.4525	-0.07
556	A0A0J5PKY8	9.4825	0.16
557	A0A0J5PR24	10.3875	0.2
558	A0A0J5Q705	9.6	0.19
559	A0A0J5PEM4	10.785	0.26
560	A0A0J5PIP9	9.905	0.41
561	A0A0J5Q6Y9	9.1975	0.38
562	A0A0J5PFU8	10.3225	0.07
563	A0A0J5PUB0	9.92	0.31
564	A0A0J5PJ19	8.655	0.29
565	A0A0J5PQ44	10.135	0.67
566	A0A0J5PWS8	10.1775	0.08
567	A0A0J5SBW0	11.0125	0.5
568	A0A0J5SV38	10.5375	0.21
569	A0A0J5Q0M2	9.065	0.05
570	A0A0J5PWQ8	10.1875	0.11
571	A0A0J5SXL4	10.1	0.41
572	A0A0J5Q7C1	9.005	0.3
573	A0A0J5PU61	8.875	0.27
574	A0A0J5SRC6	10.1925	0.33
575	A0A0J5PM40	8.835	-0.41
576	A0A0J5PK74	9.2675	-0.29
577	A0A0J5PJ79	11	-0.37
578	A0A0J5Q021	10.2125	0.05
579	A0A0J5PF60	8.655	-0.28
580	A0A0J5PMF3	11.4	-0.69
581	A0A0J5PL15	11.3	0.24
582	A0A0J5PJW0	10.9375	0.39
583	A0A0J5PLR9	8.9475	-0.24
584	A0A0J5SQ22	10.0425	0.11
585	A0A0J5PJM2	9.97	0.11
586	A0A0J5PY18	10.155	-0.09
587	A0A0J5Q2A5	10.9725	0.42
588	A0A0J5PPW2	9.965	0.29
589	A0A0J5PY47	12.125	-0.21
590	A0A0J5PZN6	8.6475	-0.12
591	A0A0J5SNJ8	9.5425	-0.01
592	A0A0J5PTP1	8.8	0.15
593	A0A0J5Q7F5	10.4475	0.45
594	A0A0J5PLY5	7.4175	0.13
595	A0A0J5PGT2	8.985	0.06
597	A0A0J5SDE5	7.0775	0.57
598	A0A0J5Q103	9.5975	0.25
599	A0A0J5SPW8	9.285	0.08
600	A0A0J5Q2G8	9.475	0.05
601	A0A0J5SXY9	8.3325	0.35
602	A0A0J5PUE5	9.71	0.12
603	A0A0J5PPI7	8.4	-0.07
604	A0A0J5PRA4	9.54	-0.11
605	A0A0J5SIH2	10.0775	0.26
606	A0A0J5PGJ3	9.8775	-0.01
608	A0A0J5PDT9	10.4	0.15
609	A0A0J5Q244	9.7275	0.02
610	A0A0J5PKC8	10.5925	0
611	A0A0J5PRK7	9.8025	-0.28
612	A0A0J5PI29	10.88	0.43
613	A0A0J5Q5E1	9.8375	0.11
614	A0A0J5Q3S1	8.57	0.19
615	A0A0J5Q1H9	10.495	0.29
616	A0A0J5PRP9	9.6725	-0.11
617	A0A0J5PQH0	9.995	0.09
618	A0A0J5SG89	9.0825	0.21
619	A0A0J5PRE6	9.8525	-0.01
620	A0A0J5SUJ6	10.3125	-0.08
621	A0A0J5PS96	9.975	0.01
622	A0A0J5PWW3	6.345	-0.07
623	A0A0J5Q2Q4	8.2925	0.29
624	A0A0J5PLI1	9.7725	0.09
625	A0A0J5PVY3	5.9325	0.09
626	A0A0J5SDC4	11.2925	-0.49
627	A0A0J5SGN3	9.655	0.04
628	A0A0J5SQR3	7.5025	0.06
629	A0A0J5Q2R3	9.34	0.64
630	A0A0J5PFU7	10.1525	0.71
631	A0A0J5Q2S0	6.995	0.21
632	A0A0J5SDM3	11.0475	0.46
634	A0A0J5PTT9	10.565	0.61
635	A0A0J5Q4L5	10.1425	0.33
636	A0A0J5PHD3	11.625	-0.1
637	A0A0J5SG11	10.5275	0.01
638	A0A0J5PHH0	11.455	-0.62
639	A0A0J5PFB8	9.505	-0.01
640	A0A0J5SZD0	8.7325	0.15
641	A0A0J5PJ56	9.0975	0.07
642	A0A0J5PY00	9.2475	0.11
643	A0A0J5PYL8	10.6825	-0.33
644	A0A0J5PQZ1	11.6075	0.02
645	A0A0J5PLR7	9.405	-0.05
646	A0A0J5PLV2	10.0825	0.12
647	A0A0J5SRX7	8.1475	0.19
648	A0A0J5PE20	8.84	-0.07
649	A0A0J5Q4M9	8.035	0.04
650	A0A0J5PV22	10.015	-0.11
651	A0A0J5PTV8	8.2475	-0.1
652	A0A0J5PR61	8.9925	-0.03
653	A0A0J5PLW5	11.1625	0.04
654	A0A0J5PVZ5	10.69	-0.29
655	A0A0J5PWV3	10.265	0.08
656	A0A0J5SXH8	10.86	0.17
657	A0A0J5PLU3	8.8875	0.41
658	A0A0J5SVR8	6.205	0.19
659	A0A0J5PRY4	10.0375	0.21
660	A0A0J5Q544	9.35	0.04
661	A0A0J5Q0M5	8.2775	0.27
662	A0A0J5PRD4	8.455	0.04
663	A0A0J5PVT5	9.8525	0.01
664	A0A0J5PQ18	10.3775	-0.04
665	A0A0J5SIA1	9.805	0.04
666	A0A0J5PZH7	9.9325	-0.04
667	A0A0J5Q839	9.4575	0.07
668	A0A0J5PTW5	10.16	0.11
669	A0A0J5SC31	10.0825	0.16
670	A0A0J5Q4M2	9.905	0.31
671	A0A0J5PQJ9	9.6425	0.17
672	A0A0J5SQQ8	9.4975	0.02
673	A0A0J5SJP5	10.3125	-0.01
674	A0A0J5PHA4	11.6875	0.35
675	A0A0J5Q378	10.9475	0.29
676	A0A0J5PL42	9.455	-0.07
677	A0A0J5PZQ1	10.025	0.04
678	A0A0J5PZ55	9.87	0.17
679	A0A0J5PRN1	9.805	0.02
680	A0A0J5PZ31	10.3375	0.09
681	A0A0J5PLF5	9.445	-0.1
682	A0A0J5SNS5	9.8925	0.19
683	A0A0J5PRM9	10.2675	0.16
684	A0A0J5PXW3	10.085	0.06
685	A0A0J5PNA6	7.9625	0.13
686	A0A0J5PM88	9.265	-0.05
687	A0A0J5PMR5	10.43	0.17
688	A0A0J5PDB8	10.61	-0.4
689	A0A0J5PLN6	9.0725	0.17
690	A0A0J5Q3Y0	9.725	0.22
691	A0A0J5PR37	9.63	0.09
692	A0A0J5SEQ2	8.3575	0.1
693	A0A0J5PJ26	9.2075	0.45
694	A0A0J5Q5P1	8.9125	0.1
695	A0A0J5PWA2	10.39	0.2
696	A0A0J5PFF4	10.1325	0.59
697	A0A0J5Q4M0	10.1275	-0.2
698	A0A0J5PN98	8.8025	0.05
699	A0A0J5PY14	9.5325	-0.02
700	A0A0J5PPF6	11.3675	0.29
701	A0A0J5PR66	9.26	-0.06
702	A0A0J5Q740	8.255	-0.07
703	A0A0J5Q0A1	8.1375	-0.28
704	A0A0J5PMR3	8.18	-0.27
705	A0A0J5SNA4	10.495	-0.24
706	A0A0J5PQV7	10.375	-0.15
707	A0A0J5Q203	10.3675	0.07
708	A0A0J5SJN2	11.8425	-0.35
709	A0A0J5SFA2	9.655	0.02
710	A0A0J5PML5	12.29	0.28
711	A0A0J5Q1B0	9.1725	0.1
712	A0A0J5PL23	9.45	0.35
713	A0A0J5SES8	12.035	0.04
714	A0A0J5PWN4	11.6275	0.24
715	A0A0J5PMS6	8.905	-0.02
716	A0A0J5SP09	11.01	-0.05
717	A0A0J5PI55	10.88	-0.01
718	A0A0J5PIC6	11.855	0.27
719	A0A0J5PG72	10.6325	0.27
720	A0A0J5PVC2	7.4175	0.48
721	A0A0J5Q2F8	11.19	0.12
722	A0A0J5PY89	10.58	0.35
723	A0A0J5PUM3	10.54	0.28
724	A0A0J5Q4L0	11.7975	0.53
725	A0A0J5Q3E1	10.58	0.15
726	A0A0J5PW25	8.5525	0.13
727	A0A0J5PZL2	12.2	0.14
728	A0A0J5PFX8	9.78	0.12
729	A0A0J5Q0I9	9.3975	0.04
730	A0A0J5PPE4	10.645	0.47
731	A0A0J5PFB1	10.325	0.02
732	A0A0J5PQU3	8.0225	0.19
733	A0A0J5PH66	10.5475	0.17
734	A0A0J5SUE8	9.975	0.11
735	A0A0J5PUX0	9.525	-0.07
736	A0A0J5PHN3	11.89	0.47
737	A0A0J5PZB2	7.275	-0.02
738	A0A0J5SJR5	7.12	0.02
739	A0A0J5PZA0	10.18	0.12
740	A0A0J5PNA9	11.1225	0.18
741	A0A0J5PWQ1	11.765	0.29
742	A0A0J5SFG0	9.4375	0.33
743	A0A0J5SSL7	10.7875	0.35
744	A0A0J5PDI6	10.2225	0.04
745	A0A0J5Q372	10.6925	0.22
746	A0A0J5PWT3	10.31	-0.25
747	A0A0J5Q040	9.41	0.14
748	A0A0J5SP98	9.5775	0.05
749	A0A0J5PPZ6	10.2375	0.09
750	A0A0J5SJ77	7.3425	0.3
751	A0A0J5PZF5	11.1575	0.3
752	A0A0J5PXS3	9.975	0.25
753	A0A0J5Q4C3	8.4225	0.07
754	A0A0J5PUR5	11.01	0.32
755	A0A0J5SC65	9.2675	0.2
756	A0A0J5PYY4	10.405	0.1
757	A0A0J5PWJ7	11.99	0.29
758	A0A0J5PKX4	11.8025	0.02
759	A0A0J5SE11	9.615	0.21
760	A0A0J5SCL3	10.7575	0.23
761	A0A0J5SSM2	11.0525	0.08
762	A0A0J5PKR9	9.7125	-0.15
763	A0A0J5PKX2	11.3425	0.04
764	A0A0J5Q0Q0	10.9675	0.04
765	A0A0J5Q775	11.4475	-0.03
766	A0A0J5PRP3	10.675	0.13
767	A0A0J5PGY0	11.4675	-0.09
768	A0A0J5PPX1	11.5575	0.28
769	A0A0J5PEH6	10.81	0.17
770	A0A0J5Q263	9.7375	-0.08
771	A0A0J5SIW4	12.4825	0.25
772	A0A0J5PL40	8.635	-0.05
773	A0A0J5Q747	11.125	-0.14
774	A0A0J5PYP0	9.4275	0.23
775	A0A0J5PYR2	10.3075	0.16
776	A0A0J5PKY1	10.7175	0.43
777	A0A0J5SKL4	10.6	0.2
778	A0A0J5SDE1	9.195	0.19
779	A0A0J5PT54	9.1625	0.04
780	A0A0J5PT86	10.1275	0.21
781	A0A0J5SRH5	10.5025	-0.01
782	A0A0J5Q1D2	9.525	0.18
783	A0A0J5Q3X4	11.37	0.33
784	A0A0J5Q7Z8	10.1825	0.36
785	A0A0J5PVQ2	6.355	0.04
786	A0A0J5PHH4	10.7325	0.14
787	A0A0J5PXU7	10.285	0.23
788	A0A0J5SW28	9.5275	-0.05
789	A0A0J5PMU8	8.6075	-0.24
790	A0A0J5PT67	9.5225	0.1
791	A0A0J5PFT3	11.61	0.7
792	A0A0J5PPQ1	6.7225	0.13
793	A0A0J5Q2N9	11.67	0.02
794	A0A0J5PPZ3	10.9675	0.01
795	A0A0J5SW01	11.74	0.44
796	A0A0J5PP11	9.57	0.16
797	A0A0J5PNR7	9.845	-0.01
798	A0A0J5SRP5	9.8525	0.13
799	A0A0J5PYN7	10.5825	0.23
800	A0A0J5PJ89	8.1575	0.07
801	A0A0J5PX50	9.67	-0.01
802	A0A0J5PUE2	10.1125	0.17
803	A0A0J5Q0T7	6.7775	-0.12
804	A0A0J5PDJ5	6.8425	0.05
805	A0A0J5Q092	7.7775	0.34
806	A0A0J5PXN8	8.595	0.1
807	A0A0J5PQV0	6.9725	0.13
808	A0A0J5PX76	9.28	0.13
809	A0A0J5SRD2	7.8	0.06
810	A0A0J5PQV3	9.3225	0
811	A0A0J5PV14	7.7975	0.1
812	A0A0J5SK76	9.8725	0.28
813	A0A0J5PEH7	9.8975	0.02
814	A0A0J5Q4T3	10.3025	0.09
815	A0A0J5Q1D8	8.245	0.06
816	A0A0J5Q0Z9	9.675	0.13
817	A0A0J5PNE9	9.7925	0.16
818	A0A0J5PYE3	8.775	-0.11
819	A0A0J5PRL9	10.8575	-0.93
820	A0A0J5PR85	7.19	0.07
821	A0A0J5Q427	10.19	-0.28
822	A0A0J5Q441	8.0025	-0.04
823	A0A0J5PUS6	9.3525	0.12
824	A0A0J5PRV4	9.36	0.15
825	A0A0J5Q751	11.1925	0.22
826	A0A0J5PUV2	8.2	0.13
827	A0A0J5SXE8	10.0375	-0.02
828	A0A0J5PX70	9.415	-0.05
829	A0A0J5PJJ0	9.1575	0.1
830	A0A0J5PW97	8.445	0.17
831	A0A0J5PFC6	9.69	0.03
832	A0A0J5SJ00	10.155	0.05
833	A0A0J5Q0S0	8.1925	0.04
834	A0A0J5SCD2	6.505	-0.04
835	A0A0J5SIC1	9.505	-0.11
836	A0A0J5Q5T8	10.25	-0.12
837	A0A0J5PSU6	9.6825	-0.21
838	A0A0J5PGL9	9.02	0.17
839	A0A0J5Q4A6	10.31	-0.09
840	A0A0J5PU19	10.6225	-0.12
841	A0A0J5PL36	8.1625	0.16
842	A0A0J5SSZ9	9.6925	0.04
843	A0A0J5SKK6	9.4375	-0.08
844	A0A0J5SNJ4	9.435	0.25
845	A0A0J5T0L7	8.25	-0.12
846	A0A0J5Q462	11.3475	-0.28
847	A0A0J5SY08	8.825	0.08
848	A0A0J5Q504	9.6225	0.05
849	A0A0J5PZA7	9.5475	-0.04
850	A0A0J5PQ40	8.8425	0.28
851	A0A0J5Q822	9.7275	-0.22
852	A0A0J5PLL3	10.0425	0.07
853	A0A0J5PGC6	10.0575	0.56
854	A0A0J5PWN2	10.53	0.11
855	A0A0J5PPL9	9.175	-0.17
856	A0A0J5Q2D2	10.5875	-0.27
857	A0A0J5Q5E2	9.985	-0.4
858	A0A0J5Q3H6	10.4	-0.28
859	A0A0J5PGG2	11.0325	-0.35
860	A0A0J5SZ56	9.9925	-0.24
861	A0A0J5Q6Q1	9.7875	-0.01
862	A0A0J5PV91	9.2875	-0.06
863	A0A0J5PM12	8.525	0.04
864	A0A0J5PEF2	10.84	0.07
865	A0A0J5Q019	9.5225	-0.11
866	A0A0J5PP44	9.995	-0.02
867	A0A0J5PP39	7.855	-0.07
868	A0A0J5PKR7	9.5525	-0.04
869	A0A0J5PK85	9.5575	-0.16
870	A0A0J5PJX1	10.0225	0.21
871	A0A0J5SCC8	10.35	0.33
872	A0A0J5SDJ3	6.82	0.24
873	A0A0J5PLR4	10.7725	0.25
874	A0A0J5PS41	10.1275	0.19
875	A0A0J5PRJ0	10.38	0.15
876	A0A0J5Q2A8	11.0725	0.2
877	A0A0J5PLK8	8.85	0.16
878	A0A0J5Q255	9.4825	-0.1
879	A0A0J5Q620	8.91	-0.34
880	A0A0J5Q713	8.48	0.04
881	A0A0J5PR12	8.6075	0.3
882	A0A0J5PKJ8	8.39	-0.13
883	A0A0J5Q6L6	10.0775	0.02
884	A0A0J5PUX6	10.2975	-0.09
885	A0A0J5PDS8	7.8725	0.13
886	A0A0J5PWP9	9.085	0.09
887	A0A0J5SCL7	7.84	0.23
888	A0A0J5PMV7	9.51	0.14
889	A0A0J5PGX5	9.195	0.24
890	A0A0J5PUK7	10.8975	0.39
891	A0A0J5PDK0	10.69	0.14
892	A0A0J5PQN2	10.5825	0.67
893	A0A0J5Q6T3	11.3175	1.06
894	A0A0J5PYM0	8.4825	0.15
895	A0A0J5PTH1	10.435	-0.05
896	A0A0J5PZ07	10.1275	0.16
897	A0A0J5PH84	9.1	0.04
898	A0A0J5PEK3	10.39	0.24
899	A0A0J5Q6I7	8.645	0.05
900	A0A0J5PLX6	8.9625	-0.05
901	A0A0J5SW10	8.445	0.11
902	A0A0J5SKL9	10.38	0.15
903	A0A0J5STF5	9.8575	0.28
904	A0A0J5SMZ9	10.04	0.63
905	A0A0J5PN15	9.3625	0
906	A0A0J5PME6	8.62	-0.13
907	A0A0J5Q7G6	11.4025	0.3
908	A0A0J5SXF2	7.9425	0.12
909	A0A0J5PLZ8	11.29	0.07
910	A0A0J5Q2V2	8.935	0.13
911	A0A0J5Q1X4	9.4225	0.47
912	A0A0J5Q7H9	9.9725	0.32
913	A0A0J5PU54	7.76	0.4
914	A0A0J5PS86	8.675	0.37
915	A0A0J5PW66	10.8575	0.67
916	A0A0J5PSU5	10.3925	0.17
917	A0A0J5PSH8	10.2	0.7
918	A0A0J5Q5W8	11.0725	-0.19
919	A0A0J5PSR8	9.7175	-0.06
920	A0A0J5PWW1	9.925	-0.21
921	A0A0J5PP57	6.9625	0.35
922	A0A0J5PSB9	10.0075	0.23
923	A0A0J5PLK3	11.5625	0.05
924	A0A0J5PSK0	9.6375	-0.11
925	A0A0J5PI00	10.405	0.54
926	A0A0J5Q3T6	12.465	-0.44
927	A0A0J5PH37	9.82	-0.09
928	A0A0J5PGI9	9.5425	0.4
929	A0A0J5SPH8	10.29	0.16
930	A0A0J5PLS2	10.5075	0.2
931	A0A0J5PUY7	10.105	0.21
932	A0A0J5PYQ0	9.54	0.1
933	A0A0J5PUD0	9.135	-0.22
934	A0A0J5PYQ9	6.085	-0.03
935	A0A0J5Q6Y5	9.155	0.12
936	A0A0J5ST99	7.965	0.11
937	A0A0J5PYT4	9.185	0.3
938	A0A0J5PMY4	8.51	-0.3
939	A0A0J5PXW8	5.56	0.08
940	A0A0J5PF02	10.99	0.12
