# Supplementary material for: Effects of amino acids on the lignocellulose degradation by Aspergillus fumigatus Z5: insights into performance, transcriptional, and proteomic profiles
Source: Biotechnol Biofuels. 2019 Jan 4;12:4. doi: 10.1186/s13068-018-1350-2 (PMC6318881; doi:10.1186/s13068-018-1350-2)
Supplement: Supplementary file 7 — Additional file 7: Dataset S6. KEGG and GO analysis results of the total proteome from A. fumigatus Z5 in different treatments. [file 13068_2018_1350_MOESM7_ESM.xlsx]

## Sheet: cys_up_go
#Term	Database	ID	Input number	Background number	P-Value	Corrected P-Value	Input	Hyperlink
cellulase activity	Gene Ontology	GO:0008810	3	15	8.32595e-05	0.0497059	tr|A0A0J5PSK8|A0A0J5PSK8_ASPFM|tr|A0A0J5SY44|A0A0J5SY44_ASPFM|tr|A0A0J5PVX0|A0A0J5PVX0_ASPFM	http://amigo.geneontology.org/cgi-bin/amigo/term_details?term=GO:0008810
polysaccharide catabolic process	Gene Ontology	GO:0000272	4	66	0.000354201	0.101482	tr|A0A0J5PSK8|A0A0J5PSK8_ASPFM|tr|A0A0J5SY44|A0A0J5SY44_ASPFM|tr|A0A0J5PVX0|A0A0J5PVX0_ASPFM|tr|A0A0J5PLR9|A0A0J5PLR9_ASPFM	http://amigo.geneontology.org/cgi-bin/amigo/term_details?term=GO:0000272
cytochrome complex	Gene Ontology	GO:0070069	2	8	0.00101357	0.105326	tr|A0A0J5PSR3|A0A0J5PSR3_ASPFM|tr|A0A0J5PPW1|A0A0J5PPW1_ASPFM	http://amigo.geneontology.org/cgi-bin/amigo/term_details?term=GO:0070069
mitochondrial ATP synthesis coupled electron transport	Gene Ontology	GO:0042775	2	9	0.00123498	0.105326	tr|A0A0J5PSR3|A0A0J5PSR3_ASPFM|tr|A0A0J5PPW1|A0A0J5PPW1_ASPFM	http://amigo.geneontology.org/cgi-bin/amigo/term_details?term=GO:0042775
oxidative phosphorylation	Gene Ontology	GO:0006119	2	9	0.00123498	0.105326	tr|A0A0J5PSR3|A0A0J5PSR3_ASPFM|tr|A0A0J5PPW1|A0A0J5PPW1_ASPFM	http://amigo.geneontology.org/cgi-bin/amigo/term_details?term=GO:0006119
ATP synthesis coupled electron transport	Gene Ontology	GO:0042773	2	9	0.00123498	0.105326	tr|A0A0J5PSR3|A0A0J5PSR3_ASPFM|tr|A0A0J5PPW1|A0A0J5PPW1_ASPFM	http://amigo.geneontology.org/cgi-bin/amigo/term_details?term=GO:0042773
respiratory electron transport chain	Gene Ontology	GO:0022904	2	11	0.00174061	0.111361	tr|A0A0J5PSR3|A0A0J5PSR3_ASPFM|tr|A0A0J5PPW1|A0A0J5PPW1_ASPFM	http://amigo.geneontology.org/cgi-bin/amigo/term_details?term=GO:0022904
respiratory chain	Gene Ontology	GO:0070469	2	13	0.00232867	0.111361	tr|A0A0J5PSR3|A0A0J5PSR3_ASPFM|tr|A0A0J5PPW1|A0A0J5PPW1_ASPFM	http://amigo.geneontology.org/cgi-bin/amigo/term_details?term=GO:0070469
mitochondrial respiratory chain	Gene Ontology	GO:0005746	2	13	0.00232867	0.111361	tr|A0A0J5PSR3|A0A0J5PSR3_ASPFM|tr|A0A0J5PPW1|A0A0J5PPW1_ASPFM	http://amigo.geneontology.org/cgi-bin/amigo/term_details?term=GO:0005746
electron transport chain	Gene Ontology	GO:0022900	2	13	0.00232867	0.111361	tr|A0A0J5PSR3|A0A0J5PSR3_ASPFM|tr|A0A0J5PPW1|A0A0J5PPW1_ASPFM	http://amigo.geneontology.org/cgi-bin/amigo/term_details?term=GO:0022900
respiratory chain complex	Gene Ontology	GO:0098803	2	13	0.00232867	0.111361	tr|A0A0J5PSR3|A0A0J5PSR3_ASPFM|tr|A0A0J5PPW1|A0A0J5PPW1_ASPFM	http://amigo.geneontology.org/cgi-bin/amigo/term_details?term=GO:0098803
carbohydrate catabolic process	Gene Ontology	GO:0016052	4	113	0.00242494	0.111361	tr|A0A0J5PSK8|A0A0J5PSK8_ASPFM|tr|A0A0J5SY44|A0A0J5SY44_ASPFM|tr|A0A0J5PVX0|A0A0J5PVX0_ASPFM|tr|A0A0J5PLR9|A0A0J5PLR9_ASPFM	http://amigo.geneontology.org/cgi-bin/amigo/term_details?term=GO:0016052
polysaccharide metabolic process	Gene Ontology	GO:0005976	4	123	0.00326302	0.139145	tr|A0A0J5PSK8|A0A0J5PSK8_ASPFM|tr|A0A0J5SY44|A0A0J5SY44_ASPFM|tr|A0A0J5PVX0|A0A0J5PVX0_ASPFM|tr|A0A0J5PLR9|A0A0J5PLR9_ASPFM	http://amigo.geneontology.org/cgi-bin/amigo/term_details?term=GO:0005976
oxidoreductase complex	Gene Ontology	GO:1990204	2	17	0.0037458	0.149083	tr|A0A0J5PW10|A0A0J5PW10_ASPFM|tr|A0A0J5PSR3|A0A0J5PSR3_ASPFM	http://amigo.geneontology.org/cgi-bin/amigo/term_details?term=GO:1990204
fungal-type cell wall	Gene Ontology	GO:0009277	3	72	0.00567771	0.209847	tr|A0A0J5PFD8|A0A0J5PFD8_ASPFM|tr|A0A0J5PS85|A0A0J5PS85_ASPFM|tr|A0A0J5PJ90|A0A0J5PJ90_ASPFM	http://amigo.geneontology.org/cgi-bin/amigo/term_details?term=GO:0009277
glucan catabolic process	Gene Ontology	GO:0009251	2	23	0.00645099	0.209847	tr|A0A0J5PSK8|A0A0J5PSK8_ASPFM|tr|A0A0J5SY44|A0A0J5SY44_ASPFM	http://amigo.geneontology.org/cgi-bin/amigo/term_details?term=GO:0009251
endoribonuclease activity	Gene Ontology	GO:0004521	2	23	0.00645099	0.209847	tr|A0A0J5PJV8|A0A0J5PJV8_ASPFM|tr|A0A0J5PRC2|A0A0J5PRC2_ASPFM	http://amigo.geneontology.org/cgi-bin/amigo/term_details?term=GO:0004521
cell wall	Gene Ontology	GO:0005618	3	77	0.00679257	0.209847	tr|A0A0J5PFD8|A0A0J5PFD8_ASPFM|tr|A0A0J5PS85|A0A0J5PS85_ASPFM|tr|A0A0J5PJ90|A0A0J5PJ90_ASPFM	http://amigo.geneontology.org/cgi-bin/amigo/term_details?term=GO:0005618
external encapsulating structure	Gene Ontology	GO:0030312	3	78	0.00703005	0.209847	tr|A0A0J5PFD8|A0A0J5PFD8_ASPFM|tr|A0A0J5PS85|A0A0J5PS85_ASPFM|tr|A0A0J5PJ90|A0A0J5PJ90_ASPFM	http://amigo.geneontology.org/cgi-bin/amigo/term_details?term=GO:0030312
aerobic respiration	Gene Ontology	GO:0009060	2	25	0.00750127	0.21325	tr|A0A0J5PSR3|A0A0J5PSR3_ASPFM|tr|A0A0J5PPW1|A0A0J5PPW1_ASPFM	http://amigo.geneontology.org/cgi-bin/amigo/term_details?term=GO:0009060
cellular component assembly involved in morphogenesis	Gene Ontology	GO:0010927	2	29	0.00981592	0.258799	tr|A0A0J5SD58|A0A0J5SD58_ASPFM|tr|A0A0J5PFD8|A0A0J5PFD8_ASPFM	http://amigo.geneontology.org/cgi-bin/amigo/term_details?term=GO:0010927
cell development	Gene Ontology	GO:0048468	3	89	0.00997048	0.258799	tr|A0A0J5SD58|A0A0J5SD58_ASPFM|tr|A0A0J5PLL4|A0A0J5PLL4_ASPFM|tr|A0A0J5PFD8|A0A0J5PFD8_ASPFM	http://amigo.geneontology.org/cgi-bin/amigo/term_details?term=GO:0048468
cytoplasmic translation	Gene Ontology	GO:0002181	2	32	0.0117337	0.260867	tr|A0A0J5PRN6|A0A0J5PRN6_ASPFM|tr|A0A0J5SIW4|A0A0J5SIW4_ASPFM	http://amigo.geneontology.org/cgi-bin/amigo/term_details?term=GO:0002181
ribonuclease activity	Gene Ontology	GO:0004540	2	33	0.0124066	0.260867	tr|A0A0J5PJV8|A0A0J5PJV8_ASPFM|tr|A0A0J5PRC2|A0A0J5PRC2_ASPFM	http://amigo.geneontology.org/cgi-bin/amigo/term_details?term=GO:0004540
phosphorylation	Gene Ontology	GO:0016310	4	184	0.0128385	0.260867	tr|A0A0J5PRN6|A0A0J5PRN6_ASPFM|tr|A0A0J5PSR3|A0A0J5PSR3_ASPFM|tr|A0A0J5SIW4|A0A0J5SIW4_ASPFM|tr|A0A0J5PPW1|A0A0J5PPW1_ASPFM	http://amigo.geneontology.org/cgi-bin/amigo/term_details?term=GO:0016310
cellular respiration	Gene Ontology	GO:0045333	2	35	0.013802	0.260867	tr|A0A0J5PSR3|A0A0J5PSR3_ASPFM|tr|A0A0J5PPW1|A0A0J5PPW1_ASPFM	http://amigo.geneontology.org/cgi-bin/amigo/term_details?term=GO:0045333
inner mitochondrial membrane protein complex	Gene Ontology	GO:0098800	2	39	0.016786	0.260867	tr|A0A0J5PSR3|A0A0J5PSR3_ASPFM|tr|A0A0J5PPW1|A0A0J5PPW1_ASPFM	http://amigo.geneontology.org/cgi-bin/amigo/term_details?term=GO:0098800
ATP metabolic process	Gene Ontology	GO:0046034	2	39	0.016786	0.260867	tr|A0A0J5PSR3|A0A0J5PSR3_ASPFM|tr|A0A0J5PPW1|A0A0J5PPW1_ASPFM	http://amigo.geneontology.org/cgi-bin/amigo/term_details?term=GO:0046034
endonuclease activity	Gene Ontology	GO:0004519	2	41	0.0183721	0.260867	tr|A0A0J5PJV8|A0A0J5PJV8_ASPFM|tr|A0A0J5PRC2|A0A0J5PRC2_ASPFM	http://amigo.geneontology.org/cgi-bin/amigo/term_details?term=GO:0004519
calcium ion binding	Gene Ontology	GO:0005509	2	41	0.0183721	0.260867	tr|A0A0J5SD58|A0A0J5SD58_ASPFM|tr|A0A0J5PT75|A0A0J5PT75_ASPFM	http://amigo.geneontology.org/cgi-bin/amigo/term_details?term=GO:0005509
hyphal tip	Gene Ontology	GO:0001411	2	41	0.0183721	0.260867	tr|A0A0J5SD58|A0A0J5SD58_ASPFM|tr|A0A0J5PRC2|A0A0J5PRC2_ASPFM	http://amigo.geneontology.org/cgi-bin/amigo/term_details?term=GO:0001411
hydrogen ion transmembrane transporter activity	Gene Ontology	GO:0015078	2	43	0.0200191	0.260867	tr|A0A0J5PSR3|A0A0J5PSR3_ASPFM|tr|A0A0J5PPW1|A0A0J5PPW1_ASPFM	http://amigo.geneontology.org/cgi-bin/amigo/term_details?term=GO:0015078
purine ribonucleoside triphosphate metabolic process	Gene Ontology	GO:0009205	2	43	0.0200191	0.260867	tr|A0A0J5PSR3|A0A0J5PSR3_ASPFM|tr|A0A0J5PPW1|A0A0J5PPW1_ASPFM	http://amigo.geneontology.org/cgi-bin/amigo/term_details?term=GO:0009205
ribonucleoside triphosphate metabolic process	Gene Ontology	GO:0009199	2	44	0.020865	0.260867	tr|A0A0J5PSR3|A0A0J5PSR3_ASPFM|tr|A0A0J5PPW1|A0A0J5PPW1_ASPFM	http://amigo.geneontology.org/cgi-bin/amigo/term_details?term=GO:0009199
purine nucleoside triphosphate metabolic process	Gene Ontology	GO:0009144	2	44	0.020865	0.260867	tr|A0A0J5PSR3|A0A0J5PSR3_ASPFM|tr|A0A0J5PPW1|A0A0J5PPW1_ASPFM	http://amigo.geneontology.org/cgi-bin/amigo/term_details?term=GO:0009144
carbohydrate binding	Gene Ontology	GO:0030246	2	45	0.0217258	0.260867	tr|A0A0J5PTV0|A0A0J5PTV0_ASPFM|tr|A0A0J5PSK8|A0A0J5PSK8_ASPFM	http://amigo.geneontology.org/cgi-bin/amigo/term_details?term=GO:0030246
sporulation	Gene Ontology	GO:0043934	4	225	0.0246231	0.260867	tr|A0A0J5PSR3|A0A0J5PSR3_ASPFM|tr|A0A0J5SD58|A0A0J5SD58_ASPFM|tr|A0A0J5PLL4|A0A0J5PLL4_ASPFM|tr|A0A0J5PFD8|A0A0J5PFD8_ASPFM	http://amigo.geneontology.org/cgi-bin/amigo/term_details?term=GO:0043934
cell septum	Gene Ontology	GO:0030428	2	50	0.0262452	0.260867	tr|A0A0J5SD58|A0A0J5SD58_ASPFM|tr|A0A0J5PRC2|A0A0J5PRC2_ASPFM	http://amigo.geneontology.org/cgi-bin/amigo/term_details?term=GO:0030428
nucleoside triphosphate metabolic process	Gene Ontology	GO:0009141	2	50	0.0262452	0.260867	tr|A0A0J5PSR3|A0A0J5PSR3_ASPFM|tr|A0A0J5PPW1|A0A0J5PPW1_ASPFM	http://amigo.geneontology.org/cgi-bin/amigo/term_details?term=GO:0009141
cellular developmental process	Gene Ontology	GO:0048869	4	234	0.0278665	0.260867	tr|A0A0J5PRN6|A0A0J5PRN6_ASPFM|tr|A0A0J5SD58|A0A0J5SD58_ASPFM|tr|A0A0J5PLL4|A0A0J5PLL4_ASPFM|tr|A0A0J5PFD8|A0A0J5PFD8_ASPFM	http://amigo.geneontology.org/cgi-bin/amigo/term_details?term=GO:0048869
anatomical structure formation involved in morphogenesis	Gene Ontology	GO:0048646	4	234	0.0278665	0.260867	tr|A0A0J5PSR3|A0A0J5PSR3_ASPFM|tr|A0A0J5SD58|A0A0J5SD58_ASPFM|tr|A0A0J5PLL4|A0A0J5PLL4_ASPFM|tr|A0A0J5PFD8|A0A0J5PFD8_ASPFM	http://amigo.geneontology.org/cgi-bin/amigo/term_details?term=GO:0048646
macromolecule catabolic process	Gene Ontology	GO:0009057	4	235	0.028242	0.260867	tr|A0A0J5PSK8|A0A0J5PSK8_ASPFM|tr|A0A0J5SY44|A0A0J5SY44_ASPFM|tr|A0A0J5PVX0|A0A0J5PVX0_ASPFM|tr|A0A0J5PLR9|A0A0J5PLR9_ASPFM	http://amigo.geneontology.org/cgi-bin/amigo/term_details?term=GO:0009057
single-organism developmental process	Gene Ontology	GO:0044767	5	352	0.0286624	0.260867	tr|A0A0J5PRN6|A0A0J5PRN6_ASPFM|tr|A0A0J5PSR3|A0A0J5PSR3_ASPFM|tr|A0A0J5PLL4|A0A0J5PLL4_ASPFM|tr|A0A0J5PFD8|A0A0J5PFD8_ASPFM|tr|A0A0J5SD58|A0A0J5SD58_ASPFM	http://amigo.geneontology.org/cgi-bin/amigo/term_details?term=GO:0044767
mitochondrial respiratory chain complex IV	Gene Ontology	GO:0005751	1	5	0.0287971	0.260867	tr|A0A0J5PPW1|A0A0J5PPW1_ASPFM	http://amigo.geneontology.org/cgi-bin/amigo/term_details?term=GO:0005751
regulation of cytoplasmic translation in response to stress	Gene Ontology	GO:1990497	1	5	0.0287971	0.260867	tr|A0A0J5PRN6|A0A0J5PRN6_ASPFM	http://amigo.geneontology.org/cgi-bin/amigo/term_details?term=GO:1990497
glycine catabolic process	Gene Ontology	GO:0006546	1	5	0.0287971	0.260867	tr|A0A0J5PW10|A0A0J5PW10_ASPFM	http://amigo.geneontology.org/cgi-bin/amigo/term_details?term=GO:0006546
maintenance of protein localization in organelle	Gene Ontology	GO:0072595	1	5	0.0287971	0.260867	tr|A0A0J5SD58|A0A0J5SD58_ASPFM	http://amigo.geneontology.org/cgi-bin/amigo/term_details?term=GO:0072595
protein localization to spindle pole body	Gene Ontology	GO:0071988	1	5	0.0287971	0.260867	tr|A0A0J5SD58|A0A0J5SD58_ASPFM	http://amigo.geneontology.org/cgi-bin/amigo/term_details?term=GO:0071988
regulation of cytoplasmic translation	Gene Ontology	GO:2000765	1	5	0.0287971	0.260867	tr|A0A0J5PRN6|A0A0J5PRN6_ASPFM	http://amigo.geneontology.org/cgi-bin/amigo/term_details?term=GO:2000765
respiratory chain complex IV	Gene Ontology	GO:0045277	1	5	0.0287971	0.260867	tr|A0A0J5PPW1|A0A0J5PPW1_ASPFM	http://amigo.geneontology.org/cgi-bin/amigo/term_details?term=GO:0045277
serine family amino acid catabolic process	Gene Ontology	GO:0009071	1	5	0.0287971	0.260867	tr|A0A0J5PW10|A0A0J5PW10_ASPFM	http://amigo.geneontology.org/cgi-bin/amigo/term_details?term=GO:0009071
monovalent inorganic cation transmembrane transporter activity	Gene Ontology	GO:0015077	2	55	0.0311106	0.260867	tr|A0A0J5PSR3|A0A0J5PSR3_ASPFM|tr|A0A0J5PPW1|A0A0J5PPW1_ASPFM	http://amigo.geneontology.org/cgi-bin/amigo/term_details?term=GO:0015077
purine nucleoside monophosphate metabolic process	Gene Ontology	GO:0009126	2	57	0.0331495	0.260867	tr|A0A0J5PSR3|A0A0J5PSR3_ASPFM|tr|A0A0J5PPW1|A0A0J5PPW1_ASPFM	http://amigo.geneontology.org/cgi-bin/amigo/term_details?term=GO:0009126
energy derivation by oxidation of organic compounds	Gene Ontology	GO:0015980	2	57	0.0331495	0.260867	tr|A0A0J5PSR3|A0A0J5PSR3_ASPFM|tr|A0A0J5PPW1|A0A0J5PPW1_ASPFM	http://amigo.geneontology.org/cgi-bin/amigo/term_details?term=GO:0015980
purine ribonucleoside monophosphate metabolic process	Gene Ontology	GO:0009167	2	57	0.0331495	0.260867	tr|A0A0J5PSR3|A0A0J5PSR3_ASPFM|tr|A0A0J5PPW1|A0A0J5PPW1_ASPFM	http://amigo.geneontology.org/cgi-bin/amigo/term_details?term=GO:0009167
unsaturated fatty acid metabolic process	Gene Ontology	GO:0033559	1	6	0.033517	0.260867	tr|A0A0J5PLL4|A0A0J5PLL4_ASPFM	http://amigo.geneontology.org/cgi-bin/amigo/term_details?term=GO:0033559
cellular response to amino acid starvation	Gene Ontology	GO:0034198	1	6	0.033517	0.260867	tr|A0A0J5PRN6|A0A0J5PRN6_ASPFM	http://amigo.geneontology.org/cgi-bin/amigo/term_details?term=GO:0034198
unsaturated fatty acid biosynthetic process	Gene Ontology	GO:0006636	1	6	0.033517	0.260867	tr|A0A0J5PLL4|A0A0J5PLL4_ASPFM	http://amigo.geneontology.org/cgi-bin/amigo/term_details?term=GO:0006636
microtubule organizing center part	Gene Ontology	GO:0044450	1	6	0.033517	0.260867	tr|A0A0J5SD58|A0A0J5SD58_ASPFM	http://amigo.geneontology.org/cgi-bin/amigo/term_details?term=GO:0044450
cytosolic ribosome	Gene Ontology	GO:0022626	2	58	0.0341882	0.260867	tr|A0A0J5PRN6|A0A0J5PRN6_ASPFM|tr|A0A0J5SIW4|A0A0J5SIW4_ASPFM	http://amigo.geneontology.org/cgi-bin/amigo/term_details?term=GO:0022626
developmental process	Gene Ontology	GO:0032502	5	372	0.0350969	0.260867	tr|A0A0J5PRN6|A0A0J5PRN6_ASPFM|tr|A0A0J5PSR3|A0A0J5PSR3_ASPFM|tr|A0A0J5PLL4|A0A0J5PLL4_ASPFM|tr|A0A0J5PFD8|A0A0J5PFD8_ASPFM|tr|A0A0J5SD58|A0A0J5SD58_ASPFM	http://amigo.geneontology.org/cgi-bin/amigo/term_details?term=GO:0032502
glucan metabolic process	Gene Ontology	GO:0044042	2	59	0.0352396	0.260867	tr|A0A0J5PSK8|A0A0J5PSK8_ASPFM|tr|A0A0J5SY44|A0A0J5SY44_ASPFM	http://amigo.geneontology.org/cgi-bin/amigo/term_details?term=GO:0044042
ribonucleoside monophosphate metabolic process	Gene Ontology	GO:0009161	2	60	0.0363034	0.260867	tr|A0A0J5PSR3|A0A0J5PSR3_ASPFM|tr|A0A0J5PPW1|A0A0J5PPW1_ASPFM	http://amigo.geneontology.org/cgi-bin/amigo/term_details?term=GO:0009161
membrane protein complex	Gene Ontology	GO:0098796	3	150	0.0378767	0.260867	tr|A0A0J5PSR3|A0A0J5PSR3_ASPFM|tr|A0A0J5PPW1|A0A0J5PPW1_ASPFM|tr|A0A0J5PI87|A0A0J5PI87_ASPFM	http://amigo.geneontology.org/cgi-bin/amigo/term_details?term=GO:0098796
cell periphery	Gene Ontology	GO:0071944	5	380	0.0379047	0.260867	tr|A0A0J5PSR3|A0A0J5PSR3_ASPFM|tr|A0A0J5PPW1|A0A0J5PPW1_ASPFM|tr|A0A0J5PS85|A0A0J5PS85_ASPFM|tr|A0A0J5PJ90|A0A0J5PJ90_ASPFM|tr|A0A0J5PFD8|A0A0J5PFD8_ASPFM	http://amigo.geneontology.org/cgi-bin/amigo/term_details?term=GO:0071944
regulation of translational initiation	Gene Ontology	GO:0006446	1	7	0.0382145	0.260867	tr|A0A0J5PRN6|A0A0J5PRN6_ASPFM	http://amigo.geneontology.org/cgi-bin/amigo/term_details?term=GO:0006446
oxidoreductase activity, acting on a heme group of donors	Gene Ontology	GO:0016675	1	7	0.0382145	0.260867	tr|A0A0J5PPW1|A0A0J5PPW1_ASPFM	http://amigo.geneontology.org/cgi-bin/amigo/term_details?term=GO:0016675
heme-copper terminal oxidase activity	Gene Ontology	GO:0015002	1	7	0.0382145	0.260867	tr|A0A0J5PPW1|A0A0J5PPW1_ASPFM	http://amigo.geneontology.org/cgi-bin/amigo/term_details?term=GO:0015002
karyogamy involved in conjugation with cellular fusion	Gene Ontology	GO:0000742	1	7	0.0382145	0.260867	tr|A0A0J5SD58|A0A0J5SD58_ASPFM	http://amigo.geneontology.org/cgi-bin/amigo/term_details?term=GO:0000742
chlamydospore formation	Gene Ontology	GO:0001410	1	7	0.0382145	0.260867	tr|A0A0J5PLL4|A0A0J5PLL4_ASPFM	http://amigo.geneontology.org/cgi-bin/amigo/term_details?term=GO:0001410
endonuclease activity, active with either ribo- or deoxyribonucleic acids and producing 3'-phosphomonoesters	Gene Ontology	GO:0016894	1	7	0.0382145	0.260867	tr|A0A0J5PJV8|A0A0J5PJV8_ASPFM	http://amigo.geneontology.org/cgi-bin/amigo/term_details?term=GO:0016894
clathrin adaptor complex	Gene Ontology	GO:0030131	1	7	0.0382145	0.260867	tr|A0A0J5PI87|A0A0J5PI87_ASPFM	http://amigo.geneontology.org/cgi-bin/amigo/term_details?term=GO:0030131
oxidoreductase activity, acting on a heme group of donors, oxygen as acceptor	Gene Ontology	GO:0016676	1	7	0.0382145	0.260867	tr|A0A0J5PPW1|A0A0J5PPW1_ASPFM	http://amigo.geneontology.org/cgi-bin/amigo/term_details?term=GO:0016676
cytochrome-c oxidase activity	Gene Ontology	GO:0004129	1	7	0.0382145	0.260867	tr|A0A0J5PPW1|A0A0J5PPW1_ASPFM	http://amigo.geneontology.org/cgi-bin/amigo/term_details?term=GO:0004129
protein kinase activator activity	Gene Ontology	GO:0030295	1	7	0.0382145	0.260867	tr|A0A0J5SIW4|A0A0J5SIW4_ASPFM	http://amigo.geneontology.org/cgi-bin/amigo/term_details?term=GO:0030295
karyogamy	Gene Ontology	GO:0000741	1	7	0.0382145	0.260867	tr|A0A0J5SD58|A0A0J5SD58_ASPFM	http://amigo.geneontology.org/cgi-bin/amigo/term_details?term=GO:0000741
spindle pole body organization	Gene Ontology	GO:0051300	1	7	0.0382145	0.260867	tr|A0A0J5SD58|A0A0J5SD58_ASPFM	http://amigo.geneontology.org/cgi-bin/amigo/term_details?term=GO:0051300
spore wall	Gene Ontology	GO:0031160	1	7	0.0382145	0.260867	tr|A0A0J5PFD8|A0A0J5PFD8_ASPFM	http://amigo.geneontology.org/cgi-bin/amigo/term_details?term=GO:0031160
mitochondrial protein complex	Gene Ontology	GO:0098798	2	62	0.0384682	0.260867	tr|A0A0J5PSR3|A0A0J5PSR3_ASPFM|tr|A0A0J5PPW1|A0A0J5PPW1_ASPFM	http://amigo.geneontology.org/cgi-bin/amigo/term_details?term=GO:0098798
nucleoside monophosphate metabolic process	Gene Ontology	GO:0009123	2	62	0.0384682	0.260867	tr|A0A0J5PSR3|A0A0J5PSR3_ASPFM|tr|A0A0J5PPW1|A0A0J5PPW1_ASPFM	http://amigo.geneontology.org/cgi-bin/amigo/term_details?term=GO:0009123
purine nucleoside metabolic process	Gene Ontology	GO:0042278	2	62	0.0384682	0.260867	tr|A0A0J5PSR3|A0A0J5PSR3_ASPFM|tr|A0A0J5PPW1|A0A0J5PPW1_ASPFM	http://amigo.geneontology.org/cgi-bin/amigo/term_details?term=GO:0042278
purine ribonucleoside metabolic process	Gene Ontology	GO:0046128	2	62	0.0384682	0.260867	tr|A0A0J5PSR3|A0A0J5PSR3_ASPFM|tr|A0A0J5PPW1|A0A0J5PPW1_ASPFM	http://amigo.geneontology.org/cgi-bin/amigo/term_details?term=GO:0046128
phosphate-containing compound metabolic process	Gene Ontology	GO:0006796	5	383	0.0389926	0.260867	tr|A0A0J5PRN6|A0A0J5PRN6_ASPFM|tr|A0A0J5PSR3|A0A0J5PSR3_ASPFM|tr|A0A0J5SIW4|A0A0J5SIW4_ASPFM|tr|A0A0J5PPW1|A0A0J5PPW1_ASPFM|tr|A0A0J5SD58|A0A0J5SD58_ASPFM	http://amigo.geneontology.org/cgi-bin/amigo/term_details?term=GO:0006796
anatomical structure morphogenesis	Gene Ontology	GO:0009653	4	266	0.0414073	0.260867	tr|A0A0J5PSR3|A0A0J5PSR3_ASPFM|tr|A0A0J5SD58|A0A0J5SD58_ASPFM|tr|A0A0J5PLL4|A0A0J5PLL4_ASPFM|tr|A0A0J5PFD8|A0A0J5PFD8_ASPFM	http://amigo.geneontology.org/cgi-bin/amigo/term_details?term=GO:0009653
nuclease activity	Gene Ontology	GO:0004518	2	65	0.0418058	0.260867	tr|A0A0J5PJV8|A0A0J5PJV8_ASPFM|tr|A0A0J5PRC2|A0A0J5PRC2_ASPFM	http://amigo.geneontology.org/cgi-bin/amigo/term_details?term=GO:0004518
phosphorus metabolic process	Gene Ontology	GO:0006793	5	392	0.0423719	0.260867	tr|A0A0J5PRN6|A0A0J5PRN6_ASPFM|tr|A0A0J5PSR3|A0A0J5PSR3_ASPFM|tr|A0A0J5SIW4|A0A0J5SIW4_ASPFM|tr|A0A0J5PPW1|A0A0J5PPW1_ASPFM|tr|A0A0J5SD58|A0A0J5SD58_ASPFM	http://amigo.geneontology.org/cgi-bin/amigo/term_details?term=GO:0006793
kinase activator activity	Gene Ontology	GO:0019209	1	8	0.0428896	0.260867	tr|A0A0J5SIW4|A0A0J5SIW4_ASPFM	http://amigo.geneontology.org/cgi-bin/amigo/term_details?term=GO:0019209
one-carbon metabolic process	Gene Ontology	GO:0006730	1	8	0.0428896	0.260867	tr|A0A0J5PW10|A0A0J5PW10_ASPFM	http://amigo.geneontology.org/cgi-bin/amigo/term_details?term=GO:0006730
regulation of translation in response to stress	Gene Ontology	GO:0043555	1	8	0.0428896	0.260867	tr|A0A0J5PRN6|A0A0J5PRN6_ASPFM	http://amigo.geneontology.org/cgi-bin/amigo/term_details?term=GO:0043555
cell cycle arrest	Gene Ontology	GO:0007050	1	8	0.0428896	0.260867	tr|A0A0J5PRN6|A0A0J5PRN6_ASPFM	http://amigo.geneontology.org/cgi-bin/amigo/term_details?term=GO:0007050
microtubule organizing center organization	Gene Ontology	GO:0031023	1	8	0.0428896	0.260867	tr|A0A0J5SD58|A0A0J5SD58_ASPFM	http://amigo.geneontology.org/cgi-bin/amigo/term_details?term=GO:0031023
barrier septum	Gene Ontology	GO:0000935	1	8	0.0428896	0.260867	tr|A0A0J5SD58|A0A0J5SD58_ASPFM	http://amigo.geneontology.org/cgi-bin/amigo/term_details?term=GO:0000935
sporulation resulting in formation of a cellular spore	Gene Ontology	GO:0030435	3	160	0.0443536	0.260867	tr|A0A0J5SD58|A0A0J5SD58_ASPFM|tr|A0A0J5PLL4|A0A0J5PLL4_ASPFM|tr|A0A0J5PFD8|A0A0J5PFD8_ASPFM	http://amigo.geneontology.org/cgi-bin/amigo/term_details?term=GO:0030435
generation of precursor metabolites and energy	Gene Ontology	GO:0006091	2	68	0.0452486	0.260867	tr|A0A0J5PSR3|A0A0J5PSR3_ASPFM|tr|A0A0J5PPW1|A0A0J5PPW1_ASPFM	http://amigo.geneontology.org/cgi-bin/amigo/term_details?term=GO:0006091
carbohydrate metabolic process	Gene Ontology	GO:0005975	5	400	0.045522	0.260867	tr|A0A0J5PTV0|A0A0J5PTV0_ASPFM|tr|A0A0J5PSK8|A0A0J5PSK8_ASPFM|tr|A0A0J5PVX0|A0A0J5PVX0_ASPFM|tr|A0A0J5SY44|A0A0J5SY44_ASPFM|tr|A0A0J5PLR9|A0A0J5PLR9_ASPFM	http://amigo.geneontology.org/cgi-bin/amigo/term_details?term=GO:0005975
clathrin coat	Gene Ontology	GO:0030118	1	9	0.0475425	0.260867	tr|A0A0J5PI87|A0A0J5PI87_ASPFM	http://amigo.geneontology.org/cgi-bin/amigo/term_details?term=GO:0030118
glycine metabolic process	Gene Ontology	GO:0006544	1	9	0.0475425	0.260867	tr|A0A0J5PW10|A0A0J5PW10_ASPFM	http://amigo.geneontology.org/cgi-bin/amigo/term_details?term=GO:0006544
regulation of G1/S transition of mitotic cell cycle	Gene Ontology	GO:2000045	1	9	0.0475425	0.260867	tr|A0A0J5PRN6|A0A0J5PRN6_ASPFM	http://amigo.geneontology.org/cgi-bin/amigo/term_details?term=GO:2000045
chronological cell aging	Gene Ontology	GO:0001300	1	9	0.0475425	0.260867	tr|A0A0J5PRN6|A0A0J5PRN6_ASPFM	http://amigo.geneontology.org/cgi-bin/amigo/term_details?term=GO:0001300
AP-type membrane coat adaptor complex	Gene Ontology	GO:0030119	1	9	0.0475425	0.260867	tr|A0A0J5PI87|A0A0J5PI87_ASPFM	http://amigo.geneontology.org/cgi-bin/amigo/term_details?term=GO:0030119
regulation of cell cycle G1/S phase transition	Gene Ontology	GO:1902806	1	9	0.0475425	0.260867	tr|A0A0J5PRN6|A0A0J5PRN6_ASPFM	http://amigo.geneontology.org/cgi-bin/amigo/term_details?term=GO:1902806
mitochondrial membrane part	Gene Ontology	GO:0044455	2	71	0.048793	0.260867	tr|A0A0J5PSR3|A0A0J5PSR3_ASPFM|tr|A0A0J5PPW1|A0A0J5PPW1_ASPFM	http://amigo.geneontology.org/cgi-bin/amigo/term_details?term=GO:0044455
hydrolase activity, hydrolyzing O-glycosyl compounds	Gene Ontology	GO:0004553	3	168	0.0499096	0.260867	tr|A0A0J5PSK8|A0A0J5PSK8_ASPFM|tr|A0A0J5SY44|A0A0J5SY44_ASPFM|tr|A0A0J5PVX0|A0A0J5PVX0_ASPFM	http://amigo.geneontology.org/cgi-bin/amigo/term_details?term=GO:0004553
ribonucleoside metabolic process	Gene Ontology	GO:0009119	2	72	0.0499965	0.260867	tr|A0A0J5PSR3|A0A0J5PSR3_ASPFM|tr|A0A0J5PPW1|A0A0J5PPW1_ASPFM	http://amigo.geneontology.org/cgi-bin/amigo/term_details?term=GO:0009119
asexual reproduction	Gene Ontology	GO:0019954	3	169	0.0506272	0.260867	tr|A0A0J5PSR3|A0A0J5PSR3_ASPFM|tr|A0A0J5SD58|A0A0J5SD58_ASPFM|tr|A0A0J5PLL4|A0A0J5PLL4_ASPFM	http://amigo.geneontology.org/cgi-bin/amigo/term_details?term=GO:0019954
cell differentiation	Gene Ontology	GO:0030154	3	169	0.0506272	0.260867	tr|A0A0J5SD58|A0A0J5SD58_ASPFM|tr|A0A0J5PLL4|A0A0J5PLL4_ASPFM|tr|A0A0J5PFD8|A0A0J5PFD8_ASPFM	http://amigo.geneontology.org/cgi-bin/amigo/term_details?term=GO:0030154
purine ribonucleotide metabolic process	Gene Ontology	GO:0009150	2	73	0.0512107	0.260867	tr|A0A0J5PSR3|A0A0J5PSR3_ASPFM|tr|A0A0J5PPW1|A0A0J5PPW1_ASPFM	http://amigo.geneontology.org/cgi-bin/amigo/term_details?term=GO:0009150
2 iron, 2 sulfur cluster binding	Gene Ontology	GO:0051537	1	10	0.0521733	0.260867	tr|A0A0J5PSR3|A0A0J5PSR3_ASPFM	http://amigo.geneontology.org/cgi-bin/amigo/term_details?term=GO:0051537
ascospore-type prospore assembly	Gene Ontology	GO:0031321	1	10	0.0521733	0.260867	tr|A0A0J5SD58|A0A0J5SD58_ASPFM	http://amigo.geneontology.org/cgi-bin/amigo/term_details?term=GO:0031321
spindle assembly	Gene Ontology	GO:0051225	1	10	0.0521733	0.260867	tr|A0A0J5SD58|A0A0J5SD58_ASPFM	http://amigo.geneontology.org/cgi-bin/amigo/term_details?term=GO:0051225
microtubule cytoskeleton organization involved in mitosis	Gene Ontology	GO:1902850	1	10	0.0521733	0.260867	tr|A0A0J5SD58|A0A0J5SD58_ASPFM	http://amigo.geneontology.org/cgi-bin/amigo/term_details?term=GO:1902850
protein localization to microtubule cytoskeleton	Gene Ontology	GO:0072698	1	10	0.0521733	0.260867	tr|A0A0J5SD58|A0A0J5SD58_ASPFM	http://amigo.geneontology.org/cgi-bin/amigo/term_details?term=GO:0072698
oxidoreductase activity, acting on diphenols and related substances as donors	Gene Ontology	GO:0016679	1	10	0.0521733	0.260867	tr|A0A0J5PSR3|A0A0J5PSR3_ASPFM	http://amigo.geneontology.org/cgi-bin/amigo/term_details?term=GO:0016679
mitotic spindle assembly	Gene Ontology	GO:0090307	1	10	0.0521733	0.260867	tr|A0A0J5SD58|A0A0J5SD58_ASPFM	http://amigo.geneontology.org/cgi-bin/amigo/term_details?term=GO:0090307
transcription factor import into nucleus	Gene Ontology	GO:0042991	1	10	0.0521733	0.260867	tr|A0A0J5SD58|A0A0J5SD58_ASPFM	http://amigo.geneontology.org/cgi-bin/amigo/term_details?term=GO:0042991
cell tip	Gene Ontology	GO:0051286	2	74	0.0524355	0.260867	tr|A0A0J5SD58|A0A0J5SD58_ASPFM|tr|A0A0J5PI87|A0A0J5PI87_ASPFM	http://amigo.geneontology.org/cgi-bin/amigo/term_details?term=GO:0051286
purine nucleotide metabolic process	Gene Ontology	GO:0006163	2	74	0.0524355	0.260867	tr|A0A0J5PSR3|A0A0J5PSR3_ASPFM|tr|A0A0J5PPW1|A0A0J5PPW1_ASPFM	http://amigo.geneontology.org/cgi-bin/amigo/term_details?term=GO:0006163
organic substance catabolic process	Gene Ontology	GO:1901575	5	422	0.054902	0.269329	tr|A0A0J5PW10|A0A0J5PW10_ASPFM|tr|A0A0J5PSK8|A0A0J5PSK8_ASPFM|tr|A0A0J5PVX0|A0A0J5PVX0_ASPFM|tr|A0A0J5SY44|A0A0J5SY44_ASPFM|tr|A0A0J5PLR9|A0A0J5PLR9_ASPFM	http://amigo.geneontology.org/cgi-bin/amigo/term_details?term=GO:1901575
hydrolase activity, acting on glycosyl bonds	Gene Ontology	GO:0016798	3	175	0.0550388	0.269329	tr|A0A0J5PSK8|A0A0J5PSK8_ASPFM|tr|A0A0J5SY44|A0A0J5SY44_ASPFM|tr|A0A0J5PVX0|A0A0J5PVX0_ASPFM	http://amigo.geneontology.org/cgi-bin/amigo/term_details?term=GO:0016798
protein localization to cytoskeleton	Gene Ontology	GO:0044380	1	11	0.056782	0.273378	tr|A0A0J5SD58|A0A0J5SD58_ASPFM	http://amigo.geneontology.org/cgi-bin/amigo/term_details?term=GO:0044380
spitzenkorper	Gene Ontology	GO:0031521	1	11	0.056782	0.273378	tr|A0A0J5SD58|A0A0J5SD58_ASPFM	http://amigo.geneontology.org/cgi-bin/amigo/term_details?term=GO:0031521
mitotic spindle pole body	Gene Ontology	GO:0044732	2	78	0.0574388	0.274328	tr|A0A0J5SD58|A0A0J5SD58_ASPFM|tr|A0A0J5PI87|A0A0J5PI87_ASPFM	http://amigo.geneontology.org/cgi-bin/amigo/term_details?term=GO:0044732
ribonucleotide metabolic process	Gene Ontology	GO:0009259	2	79	0.058715	0.278197	tr|A0A0J5PSR3|A0A0J5PSR3_ASPFM|tr|A0A0J5PPW1|A0A0J5PPW1_ASPFM	http://amigo.geneontology.org/cgi-bin/amigo/term_details?term=GO:0009259
ascospore formation	Gene Ontology	GO:0030437	2	81	0.0612969	0.282341	tr|A0A0J5SD58|A0A0J5SD58_ASPFM|tr|A0A0J5PFD8|A0A0J5PFD8_ASPFM	http://amigo.geneontology.org/cgi-bin/amigo/term_details?term=GO:0030437
cellular component morphogenesis	Gene Ontology	GO:0032989	2	82	0.0626024	0.282341	tr|A0A0J5SD58|A0A0J5SD58_ASPFM|tr|A0A0J5PFD8|A0A0J5PFD8_ASPFM	http://amigo.geneontology.org/cgi-bin/amigo/term_details?term=GO:0032989
catabolic process	Gene Ontology	GO:0009056	5	439	0.0628751	0.282341	tr|A0A0J5PW10|A0A0J5PW10_ASPFM|tr|A0A0J5PSK8|A0A0J5PSK8_ASPFM|tr|A0A0J5PVX0|A0A0J5PVX0_ASPFM|tr|A0A0J5SY44|A0A0J5SY44_ASPFM|tr|A0A0J5PLR9|A0A0J5PLR9_ASPFM	http://amigo.geneontology.org/cgi-bin/amigo/term_details?term=GO:0009056
tRNA binding	Gene Ontology	GO:0000049	1	13	0.0659337	0.282341	tr|A0A0J5PRN6|A0A0J5PRN6_ASPFM	http://amigo.geneontology.org/cgi-bin/amigo/term_details?term=GO:0000049
growing cell tip	Gene Ontology	GO:0035838	1	13	0.0659337	0.282341	tr|A0A0J5SD58|A0A0J5SD58_ASPFM	http://amigo.geneontology.org/cgi-bin/amigo/term_details?term=GO:0035838
nucleoside metabolic process	Gene Ontology	GO:0009116	2	87	0.0692704	0.282341	tr|A0A0J5PSR3|A0A0J5PSR3_ASPFM|tr|A0A0J5PPW1|A0A0J5PPW1_ASPFM	http://amigo.geneontology.org/cgi-bin/amigo/term_details?term=GO:0009116
growth	Gene Ontology	GO:0040007	4	317	0.0695539	0.282341	tr|A0A0J5PRN6|A0A0J5PRN6_ASPFM|tr|A0A0J5PSR3|A0A0J5PSR3_ASPFM|tr|A0A0J5PLL4|A0A0J5PLL4_ASPFM|tr|A0A0J5SD58|A0A0J5SD58_ASPFM	http://amigo.geneontology.org/cgi-bin/amigo/term_details?term=GO:0040007
positive regulation of protein kinase activity	Gene Ontology	GO:0045860	1	14	0.0704769	0.282341	tr|A0A0J5SIW4|A0A0J5SIW4_ASPFM	http://amigo.geneontology.org/cgi-bin/amigo/term_details?term=GO:0045860
carbon-oxygen lyase activity, acting on polysaccharides	Gene Ontology	GO:0016837	1	14	0.0704769	0.282341	tr|A0A0J5PLR9|A0A0J5PLR9_ASPFM	http://amigo.geneontology.org/cgi-bin/amigo/term_details?term=GO:0016837
lysosomal microautophagy	Gene Ontology	GO:0016237	1	14	0.0704769	0.282341	tr|A0A0J5SD58|A0A0J5SD58_ASPFM	http://amigo.geneontology.org/cgi-bin/amigo/term_details?term=GO:0016237
O-methyltransferase activity	Gene Ontology	GO:0008171	1	14	0.0704769	0.282341	tr|A0A0J5PYR8|A0A0J5PYR8_ASPFM	http://amigo.geneontology.org/cgi-bin/amigo/term_details?term=GO:0008171
ascospore wall assembly	Gene Ontology	GO:0030476	1	14	0.0704769	0.282341	tr|A0A0J5PFD8|A0A0J5PFD8_ASPFM	http://amigo.geneontology.org/cgi-bin/amigo/term_details?term=GO:0030476
anatomical structure development	Gene Ontology	GO:0048856	4	319	0.0708202	0.282341	tr|A0A0J5PSR3|A0A0J5PSR3_ASPFM|tr|A0A0J5SD58|A0A0J5SD58_ASPFM|tr|A0A0J5PLL4|A0A0J5PLL4_ASPFM|tr|A0A0J5PFD8|A0A0J5PFD8_ASPFM	http://amigo.geneontology.org/cgi-bin/amigo/term_details?term=GO:0048856
glycosyl compound metabolic process	Gene Ontology	GO:1901657	2	90	0.0733795	0.282341	tr|A0A0J5PSR3|A0A0J5PSR3_ASPFM|tr|A0A0J5PPW1|A0A0J5PPW1_ASPFM	http://amigo.geneontology.org/cgi-bin/amigo/term_details?term=GO:1901657
mitochondrial inner membrane	Gene Ontology	GO:0005743	2	91	0.0747666	0.282341	tr|A0A0J5PSR3|A0A0J5PSR3_ASPFM|tr|A0A0J5PPW1|A0A0J5PPW1_ASPFM	http://amigo.geneontology.org/cgi-bin/amigo/term_details?term=GO:0005743
reproductive process in single-celled organism	Gene Ontology	GO:0022413	2	91	0.0747666	0.282341	tr|A0A0J5SD58|A0A0J5SD58_ASPFM|tr|A0A0J5PFD8|A0A0J5PFD8_ASPFM	http://amigo.geneontology.org/cgi-bin/amigo/term_details?term=GO:0022413
purine-containing compound metabolic process	Gene Ontology	GO:0072521	2	91	0.0747666	0.282341	tr|A0A0J5PSR3|A0A0J5PSR3_ASPFM|tr|A0A0J5PPW1|A0A0J5PPW1_ASPFM	http://amigo.geneontology.org/cgi-bin/amigo/term_details?term=GO:0072521
maintenance of protein location	Gene Ontology	GO:0045185	1	15	0.0749985	0.282341	tr|A0A0J5SD58|A0A0J5SD58_ASPFM	http://amigo.geneontology.org/cgi-bin/amigo/term_details?term=GO:0045185
maintenance of protein location in cell	Gene Ontology	GO:0032507	1	15	0.0749985	0.282341	tr|A0A0J5SD58|A0A0J5SD58_ASPFM	http://amigo.geneontology.org/cgi-bin/amigo/term_details?term=GO:0032507
cellular response to neutral pH	Gene Ontology	GO:0036244	1	15	0.0749985	0.282341	tr|A0A0J5PLL4|A0A0J5PLL4_ASPFM	http://amigo.geneontology.org/cgi-bin/amigo/term_details?term=GO:0036244
positive regulation of kinase activity	Gene Ontology	GO:0033674	1	15	0.0749985	0.282341	tr|A0A0J5SIW4|A0A0J5SIW4_ASPFM	http://amigo.geneontology.org/cgi-bin/amigo/term_details?term=GO:0033674
vacuole fusion, non-autophagic	Gene Ontology	GO:0042144	1	15	0.0749985	0.282341	tr|A0A0J5SD58|A0A0J5SD58_ASPFM	http://amigo.geneontology.org/cgi-bin/amigo/term_details?term=GO:0042144
ascospore wall biogenesis	Gene Ontology	GO:0070591	1	15	0.0749985	0.282341	tr|A0A0J5PFD8|A0A0J5PFD8_ASPFM	http://amigo.geneontology.org/cgi-bin/amigo/term_details?term=GO:0070591
RNA binding	Gene Ontology	GO:0003723	3	201	0.0761885	0.282341	tr|A0A0J5PRN6|A0A0J5PRN6_ASPFM|tr|A0A0J5PJV8|A0A0J5PJV8_ASPFM|tr|A0A0J5PRC2|A0A0J5PRC2_ASPFM	http://amigo.geneontology.org/cgi-bin/amigo/term_details?term=GO:0003723
ribose phosphate metabolic process	Gene Ontology	GO:0019693	2	93	0.0775661	0.282341	tr|A0A0J5PSR3|A0A0J5PSR3_ASPFM|tr|A0A0J5PPW1|A0A0J5PPW1_ASPFM	http://amigo.geneontology.org/cgi-bin/amigo/term_details?term=GO:0019693
mitotic spindle	Gene Ontology	GO:0072686	2	94	0.0789783	0.282341	tr|A0A0J5SD58|A0A0J5SD58_ASPFM|tr|A0A0J5PI87|A0A0J5PI87_ASPFM	http://amigo.geneontology.org/cgi-bin/amigo/term_details?term=GO:0072686
oxidoreductase activity, acting on the CH-NH2 group of donors	Gene Ontology	GO:0016638	1	16	0.0794986	0.282341	tr|A0A0J5PW10|A0A0J5PW10_ASPFM	http://amigo.geneontology.org/cgi-bin/amigo/term_details?term=GO:0016638
incipient cellular bud site	Gene Ontology	GO:0000131	1	16	0.0794986	0.282341	tr|A0A0J5SD58|A0A0J5SD58_ASPFM	http://amigo.geneontology.org/cgi-bin/amigo/term_details?term=GO:0000131
fungal-type cell wall assembly	Gene Ontology	GO:0071940	1	16	0.0794986	0.282341	tr|A0A0J5PFD8|A0A0J5PFD8_ASPFM	http://amigo.geneontology.org/cgi-bin/amigo/term_details?term=GO:0071940
positive regulation of response to external stimulus	Gene Ontology	GO:0032103	1	16	0.0794986	0.282341	tr|A0A0J5PRN6|A0A0J5PRN6_ASPFM	http://amigo.geneontology.org/cgi-bin/amigo/term_details?term=GO:0032103
filamentous growth of a population of unicellular organisms in response to neutral pH	Gene Ontology	GO:0036178	1	16	0.0794986	0.282341	tr|A0A0J5PLL4|A0A0J5PLL4_ASPFM	http://amigo.geneontology.org/cgi-bin/amigo/term_details?term=GO:0036178
positive regulation of transferase activity	Gene Ontology	GO:0051347	1	16	0.0794986	0.282341	tr|A0A0J5SIW4|A0A0J5SIW4_ASPFM	http://amigo.geneontology.org/cgi-bin/amigo/term_details?term=GO:0051347
vacuole fusion	Gene Ontology	GO:0097576	1	16	0.0794986	0.282341	tr|A0A0J5SD58|A0A0J5SD58_ASPFM	http://amigo.geneontology.org/cgi-bin/amigo/term_details?term=GO:0097576
positive regulation of response to nutrient levels	Gene Ontology	GO:0032109	1	16	0.0794986	0.282341	tr|A0A0J5PRN6|A0A0J5PRN6_ASPFM	http://amigo.geneontology.org/cgi-bin/amigo/term_details?term=GO:0032109
positive regulation of response to extracellular stimulus	Gene Ontology	GO:0032106	1	16	0.0794986	0.282341	tr|A0A0J5PRN6|A0A0J5PRN6_ASPFM	http://amigo.geneontology.org/cgi-bin/amigo/term_details?term=GO:0032106
protein kinase regulator activity	Gene Ontology	GO:0019887	1	16	0.0794986	0.282341	tr|A0A0J5SIW4|A0A0J5SIW4_ASPFM	http://amigo.geneontology.org/cgi-bin/amigo/term_details?term=GO:0019887
hydrolase activity, acting on ester bonds	Gene Ontology	GO:0016788	3	205	0.0797231	0.282341	tr|A0A0J5PJV8|A0A0J5PJV8_ASPFM|tr|A0A0J5PWD4|A0A0J5PWD4_ASPFM|tr|A0A0J5PRC2|A0A0J5PRC2_ASPFM	http://amigo.geneontology.org/cgi-bin/amigo/term_details?term=GO:0016788
cytosolic part	Gene Ontology	GO:0044445	2	95	0.0803987	0.282341	tr|A0A0J5PRN6|A0A0J5PRN6_ASPFM|tr|A0A0J5SIW4|A0A0J5SIW4_ASPFM	http://amigo.geneontology.org/cgi-bin/amigo/term_details?term=GO:0044445
organelle inner membrane	Gene Ontology	GO:0019866	2	95	0.0803987	0.282341	tr|A0A0J5PSR3|A0A0J5PSR3_ASPFM|tr|A0A0J5PPW1|A0A0J5PPW1_ASPFM	http://amigo.geneontology.org/cgi-bin/amigo/term_details?term=GO:0019866
inorganic cation transmembrane transporter activity	Gene Ontology	GO:0022890	2	95	0.0803987	0.282341	tr|A0A0J5PSR3|A0A0J5PSR3_ASPFM|tr|A0A0J5PPW1|A0A0J5PPW1_ASPFM	http://amigo.geneontology.org/cgi-bin/amigo/term_details?term=GO:0022890
site of polarized growth	Gene Ontology	GO:0030427	2	95	0.0803987	0.282341	tr|A0A0J5SD58|A0A0J5SD58_ASPFM|tr|A0A0J5PRC2|A0A0J5PRC2_ASPFM	http://amigo.geneontology.org/cgi-bin/amigo/term_details?term=GO:0030427
spindle pole body	Gene Ontology	GO:0005816	2	96	0.0818271	0.282374	tr|A0A0J5SD58|A0A0J5SD58_ASPFM|tr|A0A0J5PI87|A0A0J5PI87_ASPFM	http://amigo.geneontology.org/cgi-bin/amigo/term_details?term=GO:0005816
microtubule organizing center	Gene Ontology	GO:0005815	2	96	0.0818271	0.282374	tr|A0A0J5SD58|A0A0J5SD58_ASPFM|tr|A0A0J5PI87|A0A0J5PI87_ASPFM	http://amigo.geneontology.org/cgi-bin/amigo/term_details?term=GO:0005815
spindle pole	Gene Ontology	GO:0000922	2	96	0.0818271	0.282374	tr|A0A0J5SD58|A0A0J5SD58_ASPFM|tr|A0A0J5PI87|A0A0J5PI87_ASPFM	http://amigo.geneontology.org/cgi-bin/amigo/term_details?term=GO:0000922
kinase regulator activity	Gene Ontology	GO:0019207	1	17	0.0839772	0.283245	tr|A0A0J5SIW4|A0A0J5SIW4_ASPFM	http://amigo.geneontology.org/cgi-bin/amigo/term_details?term=GO:0019207
cell budding	Gene Ontology	GO:0007114	1	17	0.0839772	0.283245	tr|A0A0J5SD58|A0A0J5SD58_ASPFM	http://amigo.geneontology.org/cgi-bin/amigo/term_details?term=GO:0007114
cellulose binding	Gene Ontology	GO:0030248	1	17	0.0839772	0.283245	tr|A0A0J5PSK8|A0A0J5PSK8_ASPFM	http://amigo.geneontology.org/cgi-bin/amigo/term_details?term=GO:0030248
response to neutral pH	Gene Ontology	GO:0036176	1	17	0.0839772	0.283245	tr|A0A0J5PLL4|A0A0J5PLL4_ASPFM	http://amigo.geneontology.org/cgi-bin/amigo/term_details?term=GO:0036176
organophosphate metabolic process	Gene Ontology	GO:0019637	3	212	0.0860797	0.286932	tr|A0A0J5PSR3|A0A0J5PSR3_ASPFM|tr|A0A0J5SD58|A0A0J5SD58_ASPFM|tr|A0A0J5PPW1|A0A0J5PPW1_ASPFM	http://amigo.geneontology.org/cgi-bin/amigo/term_details?term=GO:0019637
filamentous growth of a population of unicellular organisms in response to pH	Gene Ontology	GO:0036177	1	18	0.0884345	0.286932	tr|A0A0J5PLL4|A0A0J5PLL4_ASPFM	http://amigo.geneontology.org/cgi-bin/amigo/term_details?term=GO:0036177
cell cycle G1/S phase transition	Gene Ontology	GO:0044843	1	18	0.0884345	0.286932	tr|A0A0J5PRN6|A0A0J5PRN6_ASPFM	http://amigo.geneontology.org/cgi-bin/amigo/term_details?term=GO:0044843
G1/S transition of mitotic cell cycle	Gene Ontology	GO:0000082	1	18	0.0884345	0.286932	tr|A0A0J5PRN6|A0A0J5PRN6_ASPFM	http://amigo.geneontology.org/cgi-bin/amigo/term_details?term=GO:0000082
spore wall assembly	Gene Ontology	GO:0042244	1	18	0.0884345	0.286932	tr|A0A0J5PFD8|A0A0J5PFD8_ASPFM	http://amigo.geneontology.org/cgi-bin/amigo/term_details?term=GO:0042244
protein autophosphorylation	Gene Ontology	GO:0046777	1	18	0.0884345	0.286932	tr|A0A0J5PRN6|A0A0J5PRN6_ASPFM	http://amigo.geneontology.org/cgi-bin/amigo/term_details?term=GO:0046777
translational elongation	Gene Ontology	GO:0006414	1	19	0.0928706	0.291809	tr|A0A0J5SIW4|A0A0J5SIW4_ASPFM	http://amigo.geneontology.org/cgi-bin/amigo/term_details?term=GO:0006414
pectin catabolic process	Gene Ontology	GO:0045490	1	19	0.0928706	0.291809	tr|A0A0J5PLR9|A0A0J5PLR9_ASPFM	http://amigo.geneontology.org/cgi-bin/amigo/term_details?term=GO:0045490
pectin metabolic process	Gene Ontology	GO:0045488	1	19	0.0928706	0.291809	tr|A0A0J5PLR9|A0A0J5PLR9_ASPFM	http://amigo.geneontology.org/cgi-bin/amigo/term_details?term=GO:0045488
mitotic DNA damage checkpoint	Gene Ontology	GO:0044773	1	19	0.0928706	0.291809	tr|A0A0J5PRN6|A0A0J5PRN6_ASPFM	http://amigo.geneontology.org/cgi-bin/amigo/term_details?term=GO:0044773
galacturonan metabolic process	Gene Ontology	GO:0010393	1	19	0.0928706	0.291809	tr|A0A0J5PLR9|A0A0J5PLR9_ASPFM	http://amigo.geneontology.org/cgi-bin/amigo/term_details?term=GO:0010393
transporter complex	Gene Ontology	GO:1990351	1	19	0.0928706	0.291809	tr|A0A0J5PSR3|A0A0J5PSR3_ASPFM	http://amigo.geneontology.org/cgi-bin/amigo/term_details?term=GO:1990351
extracellular region	Gene Ontology	GO:0005576	3	221	0.0945631	0.29482	tr|A0A0J5PSK8|A0A0J5PSK8_ASPFM|tr|A0A0J5PFC0|A0A0J5PFC0_ASPFM|tr|A0A0J5PLR9|A0A0J5PLR9_ASPFM	http://amigo.geneontology.org/cgi-bin/amigo/term_details?term=GO:0005576
reproduction of a single-celled organism	Gene Ontology	GO:0032505	2	105	0.0950279	0.29482	tr|A0A0J5SD58|A0A0J5SD58_ASPFM|tr|A0A0J5PFD8|A0A0J5PFD8_ASPFM	http://amigo.geneontology.org/cgi-bin/amigo/term_details?term=GO:0032505
regulation of response to nutrient levels	Gene Ontology	GO:0032107	1	20	0.0972855	0.29482	tr|A0A0J5PRN6|A0A0J5PRN6_ASPFM	http://amigo.geneontology.org/cgi-bin/amigo/term_details?term=GO:0032107
maintenance of location in cell	Gene Ontology	GO:0051651	1	20	0.0972855	0.29482	tr|A0A0J5SD58|A0A0J5SD58_ASPFM	http://amigo.geneontology.org/cgi-bin/amigo/term_details?term=GO:0051651
cell wall assembly	Gene Ontology	GO:0070726	1	20	0.0972855	0.29482	tr|A0A0J5PFD8|A0A0J5PFD8_ASPFM	http://amigo.geneontology.org/cgi-bin/amigo/term_details?term=GO:0070726
regulation of response to extracellular stimulus	Gene Ontology	GO:0032104	1	20	0.0972855	0.29482	tr|A0A0J5PRN6|A0A0J5PRN6_ASPFM	http://amigo.geneontology.org/cgi-bin/amigo/term_details?term=GO:0032104
spore wall biogenesis	Gene Ontology	GO:0070590	1	20	0.0972855	0.29482	tr|A0A0J5PFD8|A0A0J5PFD8_ASPFM	http://amigo.geneontology.org/cgi-bin/amigo/term_details?term=GO:0070590
membrane coat	Gene Ontology	GO:0030117	1	21	0.101679	0.300508	tr|A0A0J5PI87|A0A0J5PI87_ASPFM	http://amigo.geneontology.org/cgi-bin/amigo/term_details?term=GO:0030117
positive regulation of protein phosphorylation	Gene Ontology	GO:0001934	1	21	0.101679	0.300508	tr|A0A0J5SIW4|A0A0J5SIW4_ASPFM	http://amigo.geneontology.org/cgi-bin/amigo/term_details?term=GO:0001934
pattern binding	Gene Ontology	GO:0001871	1	21	0.101679	0.300508	tr|A0A0J5PSK8|A0A0J5PSK8_ASPFM	http://amigo.geneontology.org/cgi-bin/amigo/term_details?term=GO:0001871
coated membrane	Gene Ontology	GO:0048475	1	21	0.101679	0.300508	tr|A0A0J5PI87|A0A0J5PI87_ASPFM	http://amigo.geneontology.org/cgi-bin/amigo/term_details?term=GO:0048475
polysaccharide binding	Gene Ontology	GO:0030247	1	21	0.101679	0.300508	tr|A0A0J5PSK8|A0A0J5PSK8_ASPFM	http://amigo.geneontology.org/cgi-bin/amigo/term_details?term=GO:0030247
cellular response to starvation	Gene Ontology	GO:0009267	2	111	0.104149	0.301492	tr|A0A0J5PRN6|A0A0J5PRN6_ASPFM|tr|A0A0J5PLL4|A0A0J5PLL4_ASPFM	http://amigo.geneontology.org/cgi-bin/amigo/term_details?term=GO:0009267
regulation of cellular protein metabolic process	Gene Ontology	GO:0032268	2	111	0.104149	0.301492	tr|A0A0J5PRN6|A0A0J5PRN6_ASPFM|tr|A0A0J5SIW4|A0A0J5SIW4_ASPFM	http://amigo.geneontology.org/cgi-bin/amigo/term_details?term=GO:0032268
reproduction	Gene Ontology	GO:0000003	4	368	0.105492	0.301492	tr|A0A0J5PSR3|A0A0J5PSR3_ASPFM|tr|A0A0J5SD58|A0A0J5SD58_ASPFM|tr|A0A0J5PLL4|A0A0J5PLL4_ASPFM|tr|A0A0J5PFD8|A0A0J5PFD8_ASPFM	http://amigo.geneontology.org/cgi-bin/amigo/term_details?term=GO:0000003
spindle organization	Gene Ontology	GO:0007051	1	22	0.106052	0.301492	tr|A0A0J5SD58|A0A0J5SD58_ASPFM	http://amigo.geneontology.org/cgi-bin/amigo/term_details?term=GO:0007051
regulation of response to external stimulus	Gene Ontology	GO:0032101	1	22	0.106052	0.301492	tr|A0A0J5PRN6|A0A0J5PRN6_ASPFM	http://amigo.geneontology.org/cgi-bin/amigo/term_details?term=GO:0032101
DNA damage checkpoint	Gene Ontology	GO:0000077	1	22	0.106052	0.301492	tr|A0A0J5PRN6|A0A0J5PRN6_ASPFM	http://amigo.geneontology.org/cgi-bin/amigo/term_details?term=GO:0000077
phosphatidylinositol biosynthetic process	Gene Ontology	GO:0006661	1	22	0.106052	0.301492	tr|A0A0J5SD58|A0A0J5SD58_ASPFM	http://amigo.geneontology.org/cgi-bin/amigo/term_details?term=GO:0006661
mitotic DNA integrity checkpoint	Gene Ontology	GO:0044774	1	22	0.106052	0.301492	tr|A0A0J5PRN6|A0A0J5PRN6_ASPFM	http://amigo.geneontology.org/cgi-bin/amigo/term_details?term=GO:0044774
sexual sporulation	Gene Ontology	GO:0034293	2	114	0.108797	0.305146	tr|A0A0J5SD58|A0A0J5SD58_ASPFM|tr|A0A0J5PFD8|A0A0J5PFD8_ASPFM	http://amigo.geneontology.org/cgi-bin/amigo/term_details?term=GO:0034293
sexual sporulation resulting in formation of a cellular spore	Gene Ontology	GO:0043935	2	114	0.108797	0.305146	tr|A0A0J5SD58|A0A0J5SD58_ASPFM|tr|A0A0J5PFD8|A0A0J5PFD8_ASPFM	http://amigo.geneontology.org/cgi-bin/amigo/term_details?term=GO:0043935
positive regulation of cell communication	Gene Ontology	GO:0010647	1	23	0.110405	0.305146	tr|A0A0J5PRN6|A0A0J5PRN6_ASPFM	http://amigo.geneontology.org/cgi-bin/amigo/term_details?term=GO:0010647
cellular bud tip	Gene Ontology	GO:0005934	1	23	0.110405	0.305146	tr|A0A0J5SD58|A0A0J5SD58_ASPFM	http://amigo.geneontology.org/cgi-bin/amigo/term_details?term=GO:0005934
positive regulation of phosphorylation	Gene Ontology	GO:0042327	1	23	0.110405	0.305146	tr|A0A0J5SIW4|A0A0J5SIW4_ASPFM	http://amigo.geneontology.org/cgi-bin/amigo/term_details?term=GO:0042327
cell division site	Gene Ontology	GO:0032153	2	116	0.111927	0.307928	tr|A0A0J5SD58|A0A0J5SD58_ASPFM|tr|A0A0J5PI87|A0A0J5PI87_ASPFM	http://amigo.geneontology.org/cgi-bin/amigo/term_details?term=GO:0032153
regulation of protein metabolic process	Gene Ontology	GO:0051246	2	117	0.113501	0.309943	tr|A0A0J5PRN6|A0A0J5PRN6_ASPFM|tr|A0A0J5SIW4|A0A0J5SIW4_ASPFM	http://amigo.geneontology.org/cgi-bin/amigo/term_details?term=GO:0051246
protein import into nucleus	Gene Ontology	GO:0006606	1	24	0.114736	0.309943	tr|A0A0J5SD58|A0A0J5SD58_ASPFM	http://amigo.geneontology.org/cgi-bin/amigo/term_details?term=GO:0006606
protein methyltransferase activity	Gene Ontology	GO:0008276	1	24	0.114736	0.309943	tr|A0A0J5PYR8|A0A0J5PYR8_ASPFM	http://amigo.geneontology.org/cgi-bin/amigo/term_details?term=GO:0008276
translational initiation	Gene Ontology	GO:0006413	1	24	0.114736	0.309943	tr|A0A0J5PRN6|A0A0J5PRN6_ASPFM	http://amigo.geneontology.org/cgi-bin/amigo/term_details?term=GO:0006413
spindle	Gene Ontology	GO:0005819	2	120	0.118257	0.317281	tr|A0A0J5SD58|A0A0J5SD58_ASPFM|tr|A0A0J5PI87|A0A0J5PI87_ASPFM	http://amigo.geneontology.org/cgi-bin/amigo/term_details?term=GO:0005819
protein targeting to nucleus	Gene Ontology	GO:0044744	1	25	0.119047	0.317281	tr|A0A0J5SD58|A0A0J5SD58_ASPFM	http://amigo.geneontology.org/cgi-bin/amigo/term_details?term=GO:0044744
maintenance of location	Gene Ontology	GO:0051235	1	25	0.119047	0.317281	tr|A0A0J5SD58|A0A0J5SD58_ASPFM	http://amigo.geneontology.org/cgi-bin/amigo/term_details?term=GO:0051235
response to starvation	Gene Ontology	GO:0042594	2	121	0.119854	0.318013	tr|A0A0J5PRN6|A0A0J5PRN6_ASPFM|tr|A0A0J5PLL4|A0A0J5PLL4_ASPFM	http://amigo.geneontology.org/cgi-bin/amigo/term_details?term=GO:0042594
cellular protein modification process	Gene Ontology	GO:0006464	4	389	0.122377	0.32014	tr|A0A0J5PW10|A0A0J5PW10_ASPFM|tr|A0A0J5PRN6|A0A0J5PRN6_ASPFM|tr|A0A0J5SIW4|A0A0J5SIW4_ASPFM|tr|A0A0J5PYR8|A0A0J5PYR8_ASPFM	http://amigo.geneontology.org/cgi-bin/amigo/term_details?term=GO:0006464
protein modification process	Gene Ontology	GO:0036211	4	389	0.122377	0.32014	tr|A0A0J5PW10|A0A0J5PW10_ASPFM|tr|A0A0J5PRN6|A0A0J5PRN6_ASPFM|tr|A0A0J5SIW4|A0A0J5SIW4_ASPFM|tr|A0A0J5PYR8|A0A0J5PYR8_ASPFM	http://amigo.geneontology.org/cgi-bin/amigo/term_details?term=GO:0036211
single-organism nuclear import	Gene Ontology	GO:1902593	1	26	0.123337	0.32014	tr|A0A0J5SD58|A0A0J5SD58_ASPFM	http://amigo.geneontology.org/cgi-bin/amigo/term_details?term=GO:1902593
DNA integrity checkpoint	Gene Ontology	GO:0031570	1	26	0.123337	0.32014	tr|A0A0J5PRN6|A0A0J5PRN6_ASPFM	http://amigo.geneontology.org/cgi-bin/amigo/term_details?term=GO:0031570
nucleus organization	Gene Ontology	GO:0006997	1	26	0.123337	0.32014	tr|A0A0J5SD58|A0A0J5SD58_ASPFM	http://amigo.geneontology.org/cgi-bin/amigo/term_details?term=GO:0006997
cation transmembrane transporter activity	Gene Ontology	GO:0008324	2	124	0.124677	0.322218	tr|A0A0J5PSR3|A0A0J5PSR3_ASPFM|tr|A0A0J5PPW1|A0A0J5PPW1_ASPFM	http://amigo.geneontology.org/cgi-bin/amigo/term_details?term=GO:0008324
serine family amino acid metabolic process	Gene Ontology	GO:0009069	1	27	0.127607	0.324175	tr|A0A0J5PW10|A0A0J5PW10_ASPFM	http://amigo.geneontology.org/cgi-bin/amigo/term_details?term=GO:0009069
nuclear import	Gene Ontology	GO:0051170	1	27	0.127607	0.324175	tr|A0A0J5SD58|A0A0J5SD58_ASPFM	http://amigo.geneontology.org/cgi-bin/amigo/term_details?term=GO:0051170
single-organism membrane fusion	Gene Ontology	GO:0044801	1	27	0.127607	0.324175	tr|A0A0J5SD58|A0A0J5SD58_ASPFM	http://amigo.geneontology.org/cgi-bin/amigo/term_details?term=GO:0044801
nucleotide metabolic process	Gene Ontology	GO:0009117	2	127	0.129548	0.327712	tr|A0A0J5PSR3|A0A0J5PSR3_ASPFM|tr|A0A0J5PPW1|A0A0J5PPW1_ASPFM	http://amigo.geneontology.org/cgi-bin/amigo/term_details?term=GO:0009117
plasma membrane	Gene Ontology	GO:0005886	3	256	0.130593	0.327992	tr|A0A0J5PSR3|A0A0J5PSR3_ASPFM|tr|A0A0J5PFD8|A0A0J5PFD8_ASPFM|tr|A0A0J5PPW1|A0A0J5PPW1_ASPFM	http://amigo.geneontology.org/cgi-bin/amigo/term_details?term=GO:0005886
cellular response to nutrient levels	Gene Ontology	GO:0031669	2	128	0.131181	0.327992	tr|A0A0J5PRN6|A0A0J5PRN6_ASPFM|tr|A0A0J5PLL4|A0A0J5PLL4_ASPFM	http://amigo.geneontology.org/cgi-bin/amigo/term_details?term=GO:0031669
regulation of cellular response to stress	Gene Ontology	GO:0080135	1	28	0.131856	0.327992	tr|A0A0J5PRN6|A0A0J5PRN6_ASPFM	http://amigo.geneontology.org/cgi-bin/amigo/term_details?term=GO:0080135
membrane fusion	Gene Ontology	GO:0061025	1	28	0.131856	0.327992	tr|A0A0J5SD58|A0A0J5SD58_ASPFM	http://amigo.geneontology.org/cgi-bin/amigo/term_details?term=GO:0061025
cellular response to extracellular stimulus	Gene Ontology	GO:0031668	2	129	0.13282	0.328453	tr|A0A0J5PRN6|A0A0J5PRN6_ASPFM|tr|A0A0J5PLL4|A0A0J5PLL4_ASPFM	http://amigo.geneontology.org/cgi-bin/amigo/term_details?term=GO:0031668
mitochondrion	Gene Ontology	GO:0005739	5	556	0.134456	0.328453	tr|A0A0J5PW10|A0A0J5PW10_ASPFM|tr|A0A0J5PSR3|A0A0J5PSR3_ASPFM|tr|A0A0J5PPW1|A0A0J5PPW1_ASPFM|tr|A0A0J5SDI5|A0A0J5SDI5_ASPFM|tr|A0A0J5PFD8|A0A0J5PFD8_ASPFM	http://amigo.geneontology.org/cgi-bin/amigo/term_details?term=GO:0005739
iron-sulfur cluster binding	Gene Ontology	GO:0051536	1	29	0.136085	0.328453	tr|A0A0J5PSR3|A0A0J5PSR3_ASPFM	http://amigo.geneontology.org/cgi-bin/amigo/term_details?term=GO:0051536
glycerophospholipid biosynthetic process	Gene Ontology	GO:0046474	1	29	0.136085	0.328453	tr|A0A0J5SD58|A0A0J5SD58_ASPFM	http://amigo.geneontology.org/cgi-bin/amigo/term_details?term=GO:0046474
metal cluster binding	Gene Ontology	GO:0051540	1	29	0.136085	0.328453	tr|A0A0J5PSR3|A0A0J5PSR3_ASPFM	http://amigo.geneontology.org/cgi-bin/amigo/term_details?term=GO:0051540
cell aging	Gene Ontology	GO:0007569	1	29	0.136085	0.328453	tr|A0A0J5PRN6|A0A0J5PRN6_ASPFM	http://amigo.geneontology.org/cgi-bin/amigo/term_details?term=GO:0007569
nucleoside phosphate metabolic process	Gene Ontology	GO:0006753	2	132	0.137764	0.328453	tr|A0A0J5PSR3|A0A0J5PSR3_ASPFM|tr|A0A0J5PPW1|A0A0J5PPW1_ASPFM	http://amigo.geneontology.org/cgi-bin/amigo/term_details?term=GO:0006753
cellular response to external stimulus	Gene Ontology	GO:0071496	2	132	0.137764	0.328453	tr|A0A0J5PRN6|A0A0J5PRN6_ASPFM|tr|A0A0J5PLL4|A0A0J5PLL4_ASPFM	http://amigo.geneontology.org/cgi-bin/amigo/term_details?term=GO:0071496
microtubule cytoskeleton	Gene Ontology	GO:0015630	2	132	0.137764	0.328453	tr|A0A0J5SD58|A0A0J5SD58_ASPFM|tr|A0A0J5PI87|A0A0J5PI87_ASPFM	http://amigo.geneontology.org/cgi-bin/amigo/term_details?term=GO:0015630
aging	Gene Ontology	GO:0007568	1	30	0.140294	0.328453	tr|A0A0J5PRN6|A0A0J5PRN6_ASPFM	http://amigo.geneontology.org/cgi-bin/amigo/term_details?term=GO:0007568
regulation of protein kinase activity	Gene Ontology	GO:0045859	1	30	0.140294	0.328453	tr|A0A0J5SIW4|A0A0J5SIW4_ASPFM	http://amigo.geneontology.org/cgi-bin/amigo/term_details?term=GO:0045859
negative regulation of mitotic cell cycle phase transition	Gene Ontology	GO:1901991	1	30	0.140294	0.328453	tr|A0A0J5PRN6|A0A0J5PRN6_ASPFM	http://amigo.geneontology.org/cgi-bin/amigo/term_details?term=GO:1901991
positive regulation of protein modification process	Gene Ontology	GO:0031401	1	30	0.140294	0.328453	tr|A0A0J5SIW4|A0A0J5SIW4_ASPFM	http://amigo.geneontology.org/cgi-bin/amigo/term_details?term=GO:0031401
negative regulation of cell cycle phase transition	Gene Ontology	GO:1901988	1	30	0.140294	0.328453	tr|A0A0J5PRN6|A0A0J5PRN6_ASPFM	http://amigo.geneontology.org/cgi-bin/amigo/term_details?term=GO:1901988
glycerolipid biosynthetic process	Gene Ontology	GO:0045017	1	31	0.144483	0.334327	tr|A0A0J5SD58|A0A0J5SD58_ASPFM	http://amigo.geneontology.org/cgi-bin/amigo/term_details?term=GO:0045017
cytosolic large ribosomal subunit	Gene Ontology	GO:0022625	1	31	0.144483	0.334327	tr|A0A0J5SIW4|A0A0J5SIW4_ASPFM	http://amigo.geneontology.org/cgi-bin/amigo/term_details?term=GO:0022625
regulation of growth rate	Gene Ontology	GO:0040009	1	31	0.144483	0.334327	tr|A0A0J5PSR3|A0A0J5PSR3_ASPFM	http://amigo.geneontology.org/cgi-bin/amigo/term_details?term=GO:0040009
response to nutrient levels	Gene Ontology	GO:0031667	2	138	0.147773	0.334888	tr|A0A0J5PRN6|A0A0J5PRN6_ASPFM|tr|A0A0J5PLL4|A0A0J5PLL4_ASPFM	http://amigo.geneontology.org/cgi-bin/amigo/term_details?term=GO:0031667
positive regulation of phosphorus metabolic process	Gene Ontology	GO:0010562	1	32	0.148652	0.334888	tr|A0A0J5SIW4|A0A0J5SIW4_ASPFM	http://amigo.geneontology.org/cgi-bin/amigo/term_details?term=GO:0010562
protein localization to nucleus	Gene Ontology	GO:0034504	1	32	0.148652	0.334888	tr|A0A0J5SD58|A0A0J5SD58_ASPFM	http://amigo.geneontology.org/cgi-bin/amigo/term_details?term=GO:0034504
positive regulation of phosphate metabolic process	Gene Ontology	GO:0045937	1	32	0.148652	0.334888	tr|A0A0J5SIW4|A0A0J5SIW4_ASPFM	http://amigo.geneontology.org/cgi-bin/amigo/term_details?term=GO:0045937
mating projection tip	Gene Ontology	GO:0043332	1	32	0.148652	0.334888	tr|A0A0J5SD58|A0A0J5SD58_ASPFM	http://amigo.geneontology.org/cgi-bin/amigo/term_details?term=GO:0043332
cellular response to pH	Gene Ontology	GO:0071467	1	32	0.148652	0.334888	tr|A0A0J5PLL4|A0A0J5PLL4_ASPFM	http://amigo.geneontology.org/cgi-bin/amigo/term_details?term=GO:0071467
fatty acid biosynthetic process	Gene Ontology	GO:0006633	1	32	0.148652	0.334888	tr|A0A0J5PLL4|A0A0J5PLL4_ASPFM	http://amigo.geneontology.org/cgi-bin/amigo/term_details?term=GO:0006633
response to extracellular stimulus	Gene Ontology	GO:0009991	2	139	0.149456	0.335376	tr|A0A0J5PRN6|A0A0J5PRN6_ASPFM|tr|A0A0J5PLL4|A0A0J5PLL4_ASPFM	http://amigo.geneontology.org/cgi-bin/amigo/term_details?term=GO:0009991
ion transmembrane transporter activity	Gene Ontology	GO:0015075	2	140	0.151143	0.335376	tr|A0A0J5PSR3|A0A0J5PSR3_ASPFM|tr|A0A0J5PPW1|A0A0J5PPW1_ASPFM	http://amigo.geneontology.org/cgi-bin/amigo/term_details?term=GO:0015075
primary metabolic process	Gene Ontology	GO:0044238	14	2162	0.152277	0.335376	tr|A0A0J5Q407|A0A0J5Q407_ASPFM|tr|A0A0J5PSR3|A0A0J5PSR3_ASPFM|tr|A0A0J5PPW1|A0A0J5PPW1_ASPFM|tr|A0A0J5PSK8|A0A0J5PSK8_ASPFM|tr|A0A0J5PW10|A0A0J5PW10_ASPFM|tr|A0A0J5SIW4|A0A0J5SIW4_ASPFM|tr|A0A0J5PVX0|A0A0J5PVX0_ASPFM|tr|A0A0J5PTV0|A0A0J5PTV0_ASPFM|tr|A0A0J5PRN6|A0A0J5PRN6_ASPFM|tr|A0A0J5PYR8|A0A0J5PYR8_ASPFM|tr|A0A0J5SD58|A0A0J5SD58_ASPFM|tr|A0A0J5PLL4|A0A0J5PLL4_ASPFM|tr|A0A0J5SY44|A0A0J5SY44_AS…	http://amigo.geneontology.org/cgi-bin/amigo/term_details?term=GO:0044238
regulation of kinase activity	Gene Ontology	GO:0043549	1	33	0.152801	0.335376	tr|A0A0J5SIW4|A0A0J5SIW4_ASPFM	http://amigo.geneontology.org/cgi-bin/amigo/term_details?term=GO:0043549
organelle fusion	Gene Ontology	GO:0048284	1	33	0.152801	0.335376	tr|A0A0J5SD58|A0A0J5SD58_ASPFM	http://amigo.geneontology.org/cgi-bin/amigo/term_details?term=GO:0048284
phosphatidylinositol metabolic process	Gene Ontology	GO:0046488	1	33	0.152801	0.335376	tr|A0A0J5SD58|A0A0J5SD58_ASPFM	http://amigo.geneontology.org/cgi-bin/amigo/term_details?term=GO:0046488
lipid biosynthetic process	Gene Ontology	GO:0008610	2	142	0.154529	0.337925	tr|A0A0J5SD58|A0A0J5SD58_ASPFM|tr|A0A0J5PLL4|A0A0J5PLL4_ASPFM	http://amigo.geneontology.org/cgi-bin/amigo/term_details?term=GO:0008610
protein phosphorylation	Gene Ontology	GO:0006468	2	143	0.156227	0.340393	tr|A0A0J5PRN6|A0A0J5PRN6_ASPFM|tr|A0A0J5SIW4|A0A0J5SIW4_ASPFM	http://amigo.geneontology.org/cgi-bin/amigo/term_details?term=GO:0006468
alpha-amino acid catabolic process	Gene Ontology	GO:1901606	1	34	0.15693	0.340681	tr|A0A0J5PW10|A0A0J5PW10_ASPFM	http://amigo.geneontology.org/cgi-bin/amigo/term_details?term=GO:1901606
filamentous growth	Gene Ontology	GO:0030447	3	282	0.160071	0.342787	tr|A0A0J5PRN6|A0A0J5PRN6_ASPFM|tr|A0A0J5SD58|A0A0J5SD58_ASPFM|tr|A0A0J5PLL4|A0A0J5PLL4_ASPFM	http://amigo.geneontology.org/cgi-bin/amigo/term_details?term=GO:0030447
cellular amino acid catabolic process	Gene Ontology	GO:0009063	1	35	0.16104	0.342787	tr|A0A0J5PW10|A0A0J5PW10_ASPFM	http://amigo.geneontology.org/cgi-bin/amigo/term_details?term=GO:0009063
cell projection part	Gene Ontology	GO:0044463	1	35	0.16104	0.342787	tr|A0A0J5SD58|A0A0J5SD58_ASPFM	http://amigo.geneontology.org/cgi-bin/amigo/term_details?term=GO:0044463
response to pH	Gene Ontology	GO:0009268	1	35	0.16104	0.342787	tr|A0A0J5PLL4|A0A0J5PLL4_ASPFM	http://amigo.geneontology.org/cgi-bin/amigo/term_details?term=GO:0009268
filamentous growth of a population of unicellular organisms	Gene Ontology	GO:0044182	2	146	0.161345	0.342787	tr|A0A0J5SD58|A0A0J5SD58_ASPFM|tr|A0A0J5PLL4|A0A0J5PLL4_ASPFM	http://amigo.geneontology.org/cgi-bin/amigo/term_details?term=GO:0044182
mating projection	Gene Ontology	GO:0005937	1	36	0.16513	0.344694	tr|A0A0J5SD58|A0A0J5SD58_ASPFM	http://amigo.geneontology.org/cgi-bin/amigo/term_details?term=GO:0005937
regulation of transferase activity	Gene Ontology	GO:0051338	1	36	0.16513	0.344694	tr|A0A0J5SIW4|A0A0J5SIW4_ASPFM	http://amigo.geneontology.org/cgi-bin/amigo/term_details?term=GO:0051338
cellular bud neck	Gene Ontology	GO:0005935	1	36	0.16513	0.344694	tr|A0A0J5SD58|A0A0J5SD58_ASPFM	http://amigo.geneontology.org/cgi-bin/amigo/term_details?term=GO:0005935
mitotic cell cycle checkpoint	Gene Ontology	GO:0007093	1	36	0.16513	0.344694	tr|A0A0J5PRN6|A0A0J5PRN6_ASPFM	http://amigo.geneontology.org/cgi-bin/amigo/term_details?term=GO:0007093
cell projection	Gene Ontology	GO:0042995	1	36	0.16513	0.344694	tr|A0A0J5SD58|A0A0J5SD58_ASPFM	http://amigo.geneontology.org/cgi-bin/amigo/term_details?term=GO:0042995
mitochondrial membrane	Gene Ontology	GO:0031966	2	149	0.166495	0.346332	tr|A0A0J5PSR3|A0A0J5PSR3_ASPFM|tr|A0A0J5PPW1|A0A0J5PPW1_ASPFM	http://amigo.geneontology.org/cgi-bin/amigo/term_details?term=GO:0031966
macromolecule modification	Gene Ontology	GO:0043412	4	440	0.167814	0.347495	tr|A0A0J5PW10|A0A0J5PW10_ASPFM|tr|A0A0J5PRN6|A0A0J5PRN6_ASPFM|tr|A0A0J5SIW4|A0A0J5SIW4_ASPFM|tr|A0A0J5PYR8|A0A0J5PYR8_ASPFM	http://amigo.geneontology.org/cgi-bin/amigo/term_details?term=GO:0043412
ribosome	Gene Ontology	GO:0005840	2	150	0.168218	0.347495	tr|A0A0J5PRN6|A0A0J5PRN6_ASPFM|tr|A0A0J5SIW4|A0A0J5SIW4_ASPFM	http://amigo.geneontology.org/cgi-bin/amigo/term_details?term=GO:0005840
regulation of translation	Gene Ontology	GO:0006417	1	37	0.1692	0.348319	tr|A0A0J5PRN6|A0A0J5PRN6_ASPFM	http://amigo.geneontology.org/cgi-bin/amigo/term_details?term=GO:0006417
cellular response to drug	Gene Ontology	GO:0035690	2	152	0.171674	0.352121	tr|A0A0J5SD58|A0A0J5SD58_ASPFM|tr|A0A0J5PFD8|A0A0J5PFD8_ASPFM	http://amigo.geneontology.org/cgi-bin/amigo/term_details?term=GO:0035690
autophagy	Gene Ontology	GO:0006914	1	38	0.173251	0.352121	tr|A0A0J5SD58|A0A0J5SD58_ASPFM	http://amigo.geneontology.org/cgi-bin/amigo/term_details?term=GO:0006914
asexual sporulation	Gene Ontology	GO:0030436	2	153	0.173406	0.352121	tr|A0A0J5PSR3|A0A0J5PSR3_ASPFM|tr|A0A0J5PLL4|A0A0J5PLL4_ASPFM	http://amigo.geneontology.org/cgi-bin/amigo/term_details?term=GO:0030436
vesicle-mediated transport	Gene Ontology	GO:0016192	2	153	0.173406	0.352121	tr|A0A0J5SD58|A0A0J5SD58_ASPFM|tr|A0A0J5PI87|A0A0J5PI87_ASPFM	http://amigo.geneontology.org/cgi-bin/amigo/term_details?term=GO:0016192
enzyme activator activity	Gene Ontology	GO:0008047	1	39	0.177283	0.356357	tr|A0A0J5SIW4|A0A0J5SIW4_ASPFM	http://amigo.geneontology.org/cgi-bin/amigo/term_details?term=GO:0008047
meiotic cell cycle process	Gene Ontology	GO:1903046	2	160	0.185615	0.371853	tr|A0A0J5SD58|A0A0J5SD58_ASPFM|tr|A0A0J5PFD8|A0A0J5PFD8_ASPFM	http://amigo.geneontology.org/cgi-bin/amigo/term_details?term=GO:1903046
cell cycle checkpoint	Gene Ontology	GO:0000075	1	42	0.189263	0.376633	tr|A0A0J5PRN6|A0A0J5PRN6_ASPFM	http://amigo.geneontology.org/cgi-bin/amigo/term_details?term=GO:0000075
spore germination	Gene Ontology	GO:0009847	1	42	0.189263	0.376633	tr|A0A0J5SD58|A0A0J5SD58_ASPFM	http://amigo.geneontology.org/cgi-bin/amigo/term_details?term=GO:0009847
endoplasmic reticulum	Gene Ontology	GO:0005783	3	307	0.190173	0.377187	tr|A0A0J5PLL4|A0A0J5PLL4_ASPFM|tr|A0A0J5PT75|A0A0J5PT75_ASPFM|tr|A0A0J5PFD8|A0A0J5PFD8_ASPFM	http://amigo.geneontology.org/cgi-bin/amigo/term_details?term=GO:0005783
regulation of cell cycle	Gene Ontology	GO:0051726	2	164	0.192649	0.379873	tr|A0A0J5PRN6|A0A0J5PRN6_ASPFM|tr|A0A0J5SD58|A0A0J5SD58_ASPFM	http://amigo.geneontology.org/cgi-bin/amigo/term_details?term=GO:0051726
positive regulation of cellular protein metabolic process	Gene Ontology	GO:0032270	1	43	0.193218	0.379873	tr|A0A0J5SIW4|A0A0J5SIW4_ASPFM	http://amigo.geneontology.org/cgi-bin/amigo/term_details?term=GO:0032270
response to drug	Gene Ontology	GO:0042493	2	165	0.194413	0.379873	tr|A0A0J5SD58|A0A0J5SD58_ASPFM|tr|A0A0J5PFD8|A0A0J5PFD8_ASPFM	http://amigo.geneontology.org/cgi-bin/amigo/term_details?term=GO:0042493
nucleobase-containing small molecule metabolic process	Gene Ontology	GO:0055086	2	166	0.19618	0.379873	tr|A0A0J5PSR3|A0A0J5PSR3_ASPFM|tr|A0A0J5PPW1|A0A0J5PPW1_ASPFM	http://amigo.geneontology.org/cgi-bin/amigo/term_details?term=GO:0055086
cellular bud	Gene Ontology	GO:0005933	1	44	0.197154	0.379873	tr|A0A0J5SD58|A0A0J5SD58_ASPFM	http://amigo.geneontology.org/cgi-bin/amigo/term_details?term=GO:0005933
protein serine/threonine kinase activity	Gene Ontology	GO:0004674	1	44	0.197154	0.379873	tr|A0A0J5PRN6|A0A0J5PRN6_ASPFM	http://amigo.geneontology.org/cgi-bin/amigo/term_details?term=GO:0004674
glycerophospholipid metabolic process	Gene Ontology	GO:0006650	1	44	0.197154	0.379873	tr|A0A0J5SD58|A0A0J5SD58_ASPFM	http://amigo.geneontology.org/cgi-bin/amigo/term_details?term=GO:0006650
response to external stimulus	Gene Ontology	GO:0009605	2	167	0.197948	0.379873	tr|A0A0J5PRN6|A0A0J5PRN6_ASPFM|tr|A0A0J5PLL4|A0A0J5PLL4_ASPFM	http://amigo.geneontology.org/cgi-bin/amigo/term_details?term=GO:0009605
meiotic cell cycle	Gene Ontology	GO:0051321	2	168	0.199719	0.379873	tr|A0A0J5SD58|A0A0J5SD58_ASPFM|tr|A0A0J5PFD8|A0A0J5PFD8_ASPFM	http://amigo.geneontology.org/cgi-bin/amigo/term_details?term=GO:0051321
vacuole organization	Gene Ontology	GO:0007033	1	45	0.201072	0.379873	tr|A0A0J5SD58|A0A0J5SD58_ASPFM	http://amigo.geneontology.org/cgi-bin/amigo/term_details?term=GO:0007033
regulation of protein phosphorylation	Gene Ontology	GO:0001932	1	45	0.201072	0.379873	tr|A0A0J5SIW4|A0A0J5SIW4_ASPFM	http://amigo.geneontology.org/cgi-bin/amigo/term_details?term=GO:0001932
fungal-type cell wall biogenesis	Gene Ontology	GO:0009272	1	45	0.201072	0.379873	tr|A0A0J5PFD8|A0A0J5PFD8_ASPFM	http://amigo.geneontology.org/cgi-bin/amigo/term_details?term=GO:0009272
positive regulation of catalytic activity	Gene Ontology	GO:0043085	1	45	0.201072	0.379873	tr|A0A0J5SIW4|A0A0J5SIW4_ASPFM	http://amigo.geneontology.org/cgi-bin/amigo/term_details?term=GO:0043085
endocytosis	Gene Ontology	GO:0006897	1	45	0.201072	0.379873	tr|A0A0J5SD58|A0A0J5SD58_ASPFM	http://amigo.geneontology.org/cgi-bin/amigo/term_details?term=GO:0006897
positive regulation of protein metabolic process	Gene Ontology	GO:0051247	1	45	0.201072	0.379873	tr|A0A0J5SIW4|A0A0J5SIW4_ASPFM	http://amigo.geneontology.org/cgi-bin/amigo/term_details?term=GO:0051247
microtubule cytoskeleton organization	Gene Ontology	GO:0000226	1	46	0.204971	0.382398	tr|A0A0J5SD58|A0A0J5SD58_ASPFM	http://amigo.geneontology.org/cgi-bin/amigo/term_details?term=GO:0000226
posttranscriptional regulation of gene expression	Gene Ontology	GO:0010608	1	46	0.204971	0.382398	tr|A0A0J5PRN6|A0A0J5PRN6_ASPFM	http://amigo.geneontology.org/cgi-bin/amigo/term_details?term=GO:0010608
monocarboxylic acid biosynthetic process	Gene Ontology	GO:0072330	1	46	0.204971	0.382398	tr|A0A0J5PLL4|A0A0J5PLL4_ASPFM	http://amigo.geneontology.org/cgi-bin/amigo/term_details?term=GO:0072330
phospholipid biosynthetic process	Gene Ontology	GO:0008654	1	46	0.204971	0.382398	tr|A0A0J5SD58|A0A0J5SD58_ASPFM	http://amigo.geneontology.org/cgi-bin/amigo/term_details?term=GO:0008654
mitochondrial envelope	Gene Ontology	GO:0005740	2	172	0.206823	0.383457	tr|A0A0J5PSR3|A0A0J5PSR3_ASPFM|tr|A0A0J5PPW1|A0A0J5PPW1_ASPFM	http://amigo.geneontology.org/cgi-bin/amigo/term_details?term=GO:0005740
translation	Gene Ontology	GO:0006412	2	172	0.206823	0.383457	tr|A0A0J5PRN6|A0A0J5PRN6_ASPFM|tr|A0A0J5SIW4|A0A0J5SIW4_ASPFM	http://amigo.geneontology.org/cgi-bin/amigo/term_details?term=GO:0006412
cytoplasmic part	Gene Ontology	GO:0044444	13	2099	0.210072	0.388275	tr|A0A0J5Q407|A0A0J5Q407_ASPFM|tr|A0A0J5PLL4|A0A0J5PLL4_ASPFM|tr|A0A0J5PPW1|A0A0J5PPW1_ASPFM|tr|A0A0J5SDI5|A0A0J5SDI5_ASPFM|tr|A0A0J5PW10|A0A0J5PW10_ASPFM|tr|A0A0J5PT75|A0A0J5PT75_ASPFM|tr|A0A0J5SIW4|A0A0J5SIW4_ASPFM|tr|A0A0J5PSR3|A0A0J5PSR3_ASPFM|tr|A0A0J5PRN6|A0A0J5PRN6_ASPFM|tr|A0A0J5PYR8|A0A0J5PYR8_ASPFM|tr|A0A0J5SD58|A0A0J5SD58_ASPFM|tr|A0A0J5PFD8|A0A0J5PFD8_ASPFM|tr|A0A0J5PI87|A0A0J5PI87_AS…	http://amigo.geneontology.org/cgi-bin/amigo/term_details?term=GO:0044444
macromolecular complex	Gene Ontology	GO:0032991	7	1001	0.21324	0.392915	tr|A0A0J5PPW1|A0A0J5PPW1_ASPFM|tr|A0A0J5PW10|A0A0J5PW10_ASPFM|tr|A0A0J5SIW4|A0A0J5SIW4_ASPFM|tr|A0A0J5PSR3|A0A0J5PSR3_ASPFM|tr|A0A0J5PRN6|A0A0J5PRN6_ASPFM|tr|A0A0J5SD58|A0A0J5SD58_ASPFM|tr|A0A0J5PI87|A0A0J5PI87_ASPFM	http://amigo.geneontology.org/cgi-bin/amigo/term_details?term=GO:0032991
cytoskeletal part	Gene Ontology	GO:0044430	2	177	0.215742	0.395363	tr|A0A0J5SD58|A0A0J5SD58_ASPFM|tr|A0A0J5PI87|A0A0J5PI87_ASPFM	http://amigo.geneontology.org/cgi-bin/amigo/term_details?term=GO:0044430
negative regulation of mitotic cell cycle	Gene Ontology	GO:0045930	1	49	0.216556	0.395363	tr|A0A0J5PRN6|A0A0J5PRN6_ASPFM	http://amigo.geneontology.org/cgi-bin/amigo/term_details?term=GO:0045930
regulation of phosphorylation	Gene Ontology	GO:0042325	1	49	0.216556	0.395363	tr|A0A0J5SIW4|A0A0J5SIW4_ASPFM	http://amigo.geneontology.org/cgi-bin/amigo/term_details?term=GO:0042325
single organism reproductive process	Gene Ontology	GO:0044702	2	178	0.217531	0.395932	tr|A0A0J5SD58|A0A0J5SD58_ASPFM|tr|A0A0J5PFD8|A0A0J5PFD8_ASPFM	http://amigo.geneontology.org/cgi-bin/amigo/term_details?term=GO:0044702
cytoskeleton	Gene Ontology	GO:0005856	2	180	0.221112	0.400012	tr|A0A0J5SD58|A0A0J5SD58_ASPFM|tr|A0A0J5PI87|A0A0J5PI87_ASPFM	http://amigo.geneontology.org/cgi-bin/amigo/term_details?term=GO:0005856
positive regulation of molecular function	Gene Ontology	GO:0044093	1	52	0.227976	0.409944	tr|A0A0J5SIW4|A0A0J5SIW4_ASPFM	http://amigo.geneontology.org/cgi-bin/amigo/term_details?term=GO:0044093
phosphatase activity	Gene Ontology	GO:0016791	1	52	0.227976	0.409944	tr|A0A0J5PWD4|A0A0J5PWD4_ASPFM	http://amigo.geneontology.org/cgi-bin/amigo/term_details?term=GO:0016791
S-adenosylmethionine-dependent methyltransferase activity	Gene Ontology	GO:0008757	1	53	0.231746	0.413113	tr|A0A0J5PYR8|A0A0J5PYR8_ASPFM	http://amigo.geneontology.org/cgi-bin/amigo/term_details?term=GO:0008757
cell part	Gene Ontology	GO:0044464	18	3108	0.231814	0.413113	tr|A0A0J5Q407|A0A0J5Q407_ASPFM|tr|A0A0J5PLL4|A0A0J5PLL4_ASPFM|tr|A0A0J5PPW1|A0A0J5PPW1_ASPFM|tr|A0A0J5PJ90|A0A0J5PJ90_ASPFM|tr|A0A0J5SDI5|A0A0J5SDI5_ASPFM|tr|A0A0J5PW10|A0A0J5PW10_ASPFM|tr|A0A0J5PT75|A0A0J5PT75_ASPFM|tr|A0A0J5SIW4|A0A0J5SIW4_ASPFM|tr|A0A0J5PS85|A0A0J5PS85_ASPFM|tr|A0A0J5PSR3|A0A0J5PSR3_ASPFM|tr|A0A0J5PRN6|A0A0J5PRN6_ASPFM|tr|A0A0J5PM30|A0A0J5PM30_ASPFM|tr|A0A0J5PYR8|A0A0J5PYR8_AS…	http://amigo.geneontology.org/cgi-bin/amigo/term_details?term=GO:0044464
cell	Gene Ontology	GO:0005623	18	3108	0.231814	0.413113	tr|A0A0J5Q407|A0A0J5Q407_ASPFM|tr|A0A0J5PLL4|A0A0J5PLL4_ASPFM|tr|A0A0J5PPW1|A0A0J5PPW1_ASPFM|tr|A0A0J5PJ90|A0A0J5PJ90_ASPFM|tr|A0A0J5SDI5|A0A0J5SDI5_ASPFM|tr|A0A0J5PW10|A0A0J5PW10_ASPFM|tr|A0A0J5PT75|A0A0J5PT75_ASPFM|tr|A0A0J5SIW4|A0A0J5SIW4_ASPFM|tr|A0A0J5PS85|A0A0J5PS85_ASPFM|tr|A0A0J5PSR3|A0A0J5PSR3_ASPFM|tr|A0A0J5PRN6|A0A0J5PRN6_ASPFM|tr|A0A0J5PM30|A0A0J5PM30_ASPFM|tr|A0A0J5PYR8|A0A0J5PYR8_AS…	http://amigo.geneontology.org/cgi-bin/amigo/term_details?term=GO:0005623
intracellular protein transport	Gene Ontology	GO:0006886	2	188	0.235489	0.417188	tr|A0A0J5SD58|A0A0J5SD58_ASPFM|tr|A0A0J5PI87|A0A0J5PI87_ASPFM	http://amigo.geneontology.org/cgi-bin/amigo/term_details?term=GO:0006886
asexual sporulation resulting in formation of a cellular spore	Gene Ontology	GO:0043936	1	54	0.235498	0.417188	tr|A0A0J5PLL4|A0A0J5PLL4_ASPFM	http://amigo.geneontology.org/cgi-bin/amigo/term_details?term=GO:0043936
cell cycle process	Gene Ontology	GO:0022402	3	344	0.237121	0.41882	tr|A0A0J5PRN6|A0A0J5PRN6_ASPFM|tr|A0A0J5SD58|A0A0J5SD58_ASPFM|tr|A0A0J5PFD8|A0A0J5PFD8_ASPFM	http://amigo.geneontology.org/cgi-bin/amigo/term_details?term=GO:0022402
glycerolipid metabolic process	Gene Ontology	GO:0046486	1	55	0.239232	0.421303	tr|A0A0J5SD58|A0A0J5SD58_ASPFM	http://amigo.geneontology.org/cgi-bin/amigo/term_details?term=GO:0046486
organonitrogen compound metabolic process	Gene Ontology	GO:1901564	5	683	0.240035	0.421474	tr|A0A0J5PW10|A0A0J5PW10_ASPFM|tr|A0A0J5PRN6|A0A0J5PRN6_ASPFM|tr|A0A0J5SIW4|A0A0J5SIW4_ASPFM|tr|A0A0J5PPW1|A0A0J5PPW1_ASPFM|tr|A0A0J5PSR3|A0A0J5PSR3_ASPFM	http://amigo.geneontology.org/cgi-bin/amigo/term_details?term=GO:1901564
mitotic cell cycle process	Gene Ontology	GO:1903047	2	193	0.244507	0.428067	tr|A0A0J5PRN6|A0A0J5PRN6_ASPFM|tr|A0A0J5SD58|A0A0J5SD58_ASPFM	http://amigo.geneontology.org/cgi-bin/amigo/term_details?term=GO:1903047
cell wall biogenesis	Gene Ontology	GO:0042546	1	58	0.250329	0.434437	tr|A0A0J5PFD8|A0A0J5PFD8_ASPFM	http://amigo.geneontology.org/cgi-bin/amigo/term_details?term=GO:0042546
positive regulation of response to stimulus	Gene Ontology	GO:0048584	1	58	0.250329	0.434437	tr|A0A0J5PRN6|A0A0J5PRN6_ASPFM	http://amigo.geneontology.org/cgi-bin/amigo/term_details?term=GO:0048584
carbon-oxygen lyase activity	Gene Ontology	GO:0016835	1	58	0.250329	0.434437	tr|A0A0J5PLR9|A0A0J5PLR9_ASPFM	http://amigo.geneontology.org/cgi-bin/amigo/term_details?term=GO:0016835
endomembrane system	Gene Ontology	GO:0012505	4	523	0.252196	0.436408	tr|A0A0J5SD58|A0A0J5SD58_ASPFM|tr|A0A0J5PLL4|A0A0J5PLL4_ASPFM|tr|A0A0J5PT75|A0A0J5PT75_ASPFM|tr|A0A0J5PFD8|A0A0J5PFD8_ASPFM	http://amigo.geneontology.org/cgi-bin/amigo/term_details?term=GO:0012505
conjugation with cellular fusion	Gene Ontology	GO:0000747	1	59	0.253992	0.436983	tr|A0A0J5SD58|A0A0J5SD58_ASPFM	http://amigo.geneontology.org/cgi-bin/amigo/term_details?term=GO:0000747
mitotic cell cycle	Gene Ontology	GO:0000278	2	200	0.25716	0.44061	tr|A0A0J5PRN6|A0A0J5PRN6_ASPFM|tr|A0A0J5SD58|A0A0J5SD58_ASPFM	http://amigo.geneontology.org/cgi-bin/amigo/term_details?term=GO:0000278
conjugation	Gene Ontology	GO:0000746	1	60	0.257638	0.44061	tr|A0A0J5SD58|A0A0J5SD58_ASPFM	http://amigo.geneontology.org/cgi-bin/amigo/term_details?term=GO:0000746
protein import	Gene Ontology	GO:0017038	1	61	0.261266	0.44061	tr|A0A0J5SD58|A0A0J5SD58_ASPFM	http://amigo.geneontology.org/cgi-bin/amigo/term_details?term=GO:0017038
isomerase activity	Gene Ontology	GO:0016853	1	61	0.261266	0.44061	tr|A0A0J5PTV0|A0A0J5PTV0_ASPFM	http://amigo.geneontology.org/cgi-bin/amigo/term_details?term=GO:0016853
microtubule-based process	Gene Ontology	GO:0007017	1	61	0.261266	0.44061	tr|A0A0J5SD58|A0A0J5SD58_ASPFM	http://amigo.geneontology.org/cgi-bin/amigo/term_details?term=GO:0007017
regulation of response to stress	Gene Ontology	GO:0080134	1	61	0.261266	0.44061	tr|A0A0J5PRN6|A0A0J5PRN6_ASPFM	http://amigo.geneontology.org/cgi-bin/amigo/term_details?term=GO:0080134
regulation of cellular amide metabolic process	Gene Ontology	GO:0034248	1	62	0.264877	0.442946	tr|A0A0J5PRN6|A0A0J5PRN6_ASPFM	http://amigo.geneontology.org/cgi-bin/amigo/term_details?term=GO:0034248
cell surface	Gene Ontology	GO:0009986	1	62	0.264877	0.442946	tr|A0A0J5PFD8|A0A0J5PFD8_ASPFM	http://amigo.geneontology.org/cgi-bin/amigo/term_details?term=GO:0009986
large ribosomal subunit	Gene Ontology	GO:0015934	1	62	0.264877	0.442946	tr|A0A0J5SIW4|A0A0J5SIW4_ASPFM	http://amigo.geneontology.org/cgi-bin/amigo/term_details?term=GO:0015934
cell cycle	Gene Ontology	GO:0007049	3	367	0.26732	0.444998	tr|A0A0J5PRN6|A0A0J5PRN6_ASPFM|tr|A0A0J5SD58|A0A0J5SD58_ASPFM|tr|A0A0J5PFD8|A0A0J5PFD8_ASPFM	http://amigo.geneontology.org/cgi-bin/amigo/term_details?term=GO:0007049
regulation of cell cycle phase transition	Gene Ontology	GO:1901987	1	63	0.268471	0.444998	tr|A0A0J5PRN6|A0A0J5PRN6_ASPFM	http://amigo.geneontology.org/cgi-bin/amigo/term_details?term=GO:1901987
regulation of mitotic cell cycle phase transition	Gene Ontology	GO:1901990	1	63	0.268471	0.444998	tr|A0A0J5PRN6|A0A0J5PRN6_ASPFM	http://amigo.geneontology.org/cgi-bin/amigo/term_details?term=GO:1901990
sexual reproduction	Gene Ontology	GO:0019953	2	207	0.269831	0.444998	tr|A0A0J5SD58|A0A0J5SD58_ASPFM|tr|A0A0J5PFD8|A0A0J5PFD8_ASPFM	http://amigo.geneontology.org/cgi-bin/amigo/term_details?term=GO:0019953
multi-organism reproductive process	Gene Ontology	GO:0044703	2	207	0.269831	0.444998	tr|A0A0J5SD58|A0A0J5SD58_ASPFM|tr|A0A0J5PFD8|A0A0J5PFD8_ASPFM	http://amigo.geneontology.org/cgi-bin/amigo/term_details?term=GO:0044703
protein transport	Gene Ontology	GO:0015031	2	209	0.273453	0.449728	tr|A0A0J5SD58|A0A0J5SD58_ASPFM|tr|A0A0J5PI87|A0A0J5PI87_ASPFM	http://amigo.geneontology.org/cgi-bin/amigo/term_details?term=GO:0015031
regulation of protein modification process	Gene Ontology	GO:0031399	1	65	0.275607	0.450788	tr|A0A0J5SIW4|A0A0J5SIW4_ASPFM	http://amigo.geneontology.org/cgi-bin/amigo/term_details?term=GO:0031399
protein complex	Gene Ontology	GO:0043234	5	722	0.276502	0.451015	tr|A0A0J5PW10|A0A0J5PW10_ASPFM|tr|A0A0J5PSR3|A0A0J5PSR3_ASPFM|tr|A0A0J5PI87|A0A0J5PI87_ASPFM|tr|A0A0J5SD58|A0A0J5SD58_ASPFM|tr|A0A0J5PPW1|A0A0J5PPW1_ASPFM	http://amigo.geneontology.org/cgi-bin/amigo/term_details?term=GO:0043234
cellular lipid metabolic process	Gene Ontology	GO:0044255	2	212	0.278884	0.453662	tr|A0A0J5SD58|A0A0J5SD58_ASPFM|tr|A0A0J5PLL4|A0A0J5PLL4_ASPFM	http://amigo.geneontology.org/cgi-bin/amigo/term_details?term=GO:0044255
developmental process involved in reproduction	Gene Ontology	GO:0003006	2	213	0.280695	0.454132	tr|A0A0J5SD58|A0A0J5SD58_ASPFM|tr|A0A0J5PFD8|A0A0J5PFD8_ASPFM	http://amigo.geneontology.org/cgi-bin/amigo/term_details?term=GO:0003006
establishment of protein localization	Gene Ontology	GO:0045184	2	213	0.280695	0.454132	tr|A0A0J5SD58|A0A0J5SD58_ASPFM|tr|A0A0J5PI87|A0A0J5PI87_ASPFM	http://amigo.geneontology.org/cgi-bin/amigo/term_details?term=GO:0045184
regulation of phosphate metabolic process	Gene Ontology	GO:0019220	1	67	0.282675	0.454871	tr|A0A0J5SIW4|A0A0J5SIW4_ASPFM	http://amigo.geneontology.org/cgi-bin/amigo/term_details?term=GO:0019220
regulation of phosphorus metabolic process	Gene Ontology	GO:0051174	1	67	0.282675	0.454871	tr|A0A0J5SIW4|A0A0J5SIW4_ASPFM	http://amigo.geneontology.org/cgi-bin/amigo/term_details?term=GO:0051174
peptide biosynthetic process	Gene Ontology	GO:0043043	2	216	0.286125	0.456823	tr|A0A0J5PRN6|A0A0J5PRN6_ASPFM|tr|A0A0J5SIW4|A0A0J5SIW4_ASPFM	http://amigo.geneontology.org/cgi-bin/amigo/term_details?term=GO:0043043
filamentous growth of a population of unicellular organisms in response to starvation	Gene Ontology	GO:0036170	1	68	0.286184	0.456823	tr|A0A0J5PLL4|A0A0J5PLL4_ASPFM	http://amigo.geneontology.org/cgi-bin/amigo/term_details?term=GO:0036170
fatty acid metabolic process	Gene Ontology	GO:0006631	1	68	0.286184	0.456823	tr|A0A0J5PLL4|A0A0J5PLL4_ASPFM	http://amigo.geneontology.org/cgi-bin/amigo/term_details?term=GO:0006631
organic substance metabolic process	Gene Ontology	GO:0071704	14	2433	0.286982	0.456875	tr|A0A0J5Q407|A0A0J5Q407_ASPFM|tr|A0A0J5PSR3|A0A0J5PSR3_ASPFM|tr|A0A0J5PPW1|A0A0J5PPW1_ASPFM|tr|A0A0J5PSK8|A0A0J5PSK8_ASPFM|tr|A0A0J5PW10|A0A0J5PW10_ASPFM|tr|A0A0J5SIW4|A0A0J5SIW4_ASPFM|tr|A0A0J5PVX0|A0A0J5PVX0_ASPFM|tr|A0A0J5PTV0|A0A0J5PTV0_ASPFM|tr|A0A0J5PRN6|A0A0J5PRN6_ASPFM|tr|A0A0J5PYR8|A0A0J5PYR8_ASPFM|tr|A0A0J5SD58|A0A0J5SD58_ASPFM|tr|A0A0J5PLL4|A0A0J5PLL4_ASPFM|tr|A0A0J5SY44|A0A0J5SY44_AS…	http://amigo.geneontology.org/cgi-bin/amigo/term_details?term=GO:0071704
organelle assembly	Gene Ontology	GO:0070925	1	70	0.293151	0.46422	tr|A0A0J5SD58|A0A0J5SD58_ASPFM	http://amigo.geneontology.org/cgi-bin/amigo/term_details?term=GO:0070925
phospholipid metabolic process	Gene Ontology	GO:0006644	1	70	0.293151	0.46422	tr|A0A0J5SD58|A0A0J5SD58_ASPFM	http://amigo.geneontology.org/cgi-bin/amigo/term_details?term=GO:0006644
phosphoric ester hydrolase activity	Gene Ontology	GO:0042578	1	71	0.296609	0.468454	tr|A0A0J5PWD4|A0A0J5PWD4_ASPFM	http://amigo.geneontology.org/cgi-bin/amigo/term_details?term=GO:0042578
mitotic cell cycle phase transition	Gene Ontology	GO:0044772	1	72	0.300051	0.471396	tr|A0A0J5PRN6|A0A0J5PRN6_ASPFM	http://amigo.geneontology.org/cgi-bin/amigo/term_details?term=GO:0044772
enzyme regulator activity	Gene Ontology	GO:0030234	1	73	0.303477	0.475526	tr|A0A0J5SIW4|A0A0J5SIW4_ASPFM	http://amigo.geneontology.org/cgi-bin/amigo/term_details?term=GO:0030234
regulation of cell communication	Gene Ontology	GO:0010646	1	74	0.306885	0.479609	tr|A0A0J5PRN6|A0A0J5PRN6_ASPFM	http://amigo.geneontology.org/cgi-bin/amigo/term_details?term=GO:0010646
protein tyrosine kinase activity	Gene Ontology	GO:0004713	1	75	0.310278	0.482386	tr|A0A0J5PRN6|A0A0J5PRN6_ASPFM	http://amigo.geneontology.org/cgi-bin/amigo/term_details?term=GO:0004713
cell cycle phase transition	Gene Ontology	GO:0044770	1	75	0.310278	0.482386	tr|A0A0J5PRN6|A0A0J5PRN6_ASPFM	http://amigo.geneontology.org/cgi-bin/amigo/term_details?term=GO:0044770
peptide metabolic process	Gene Ontology	GO:0006518	2	232	0.315012	0.488473	tr|A0A0J5PRN6|A0A0J5PRN6_ASPFM|tr|A0A0J5SIW4|A0A0J5SIW4_ASPFM	http://amigo.geneontology.org/cgi-bin/amigo/term_details?term=GO:0006518
hydrolase activity	Gene Ontology	GO:0016787	6	948	0.31627	0.489038	tr|A0A0J5PSK8|A0A0J5PSK8_ASPFM|tr|A0A0J5PVX0|A0A0J5PVX0_ASPFM|tr|A0A0J5PJV8|A0A0J5PJV8_ASPFM|tr|A0A0J5PRC2|A0A0J5PRC2_ASPFM|tr|A0A0J5SY44|A0A0J5SY44_ASPFM|tr|A0A0J5PWD4|A0A0J5PWD4_ASPFM	http://amigo.geneontology.org/cgi-bin/amigo/term_details?term=GO:0016787
negative regulation of cell cycle process	Gene Ontology	GO:0010948	1	77	0.317015	0.489038	tr|A0A0J5PRN6|A0A0J5PRN6_ASPFM	http://amigo.geneontology.org/cgi-bin/amigo/term_details?term=GO:0010948
carboxylic acid catabolic process	Gene Ontology	GO:0046395	1	78	0.320359	0.49173	tr|A0A0J5PW10|A0A0J5PW10_ASPFM	http://amigo.geneontology.org/cgi-bin/amigo/term_details?term=GO:0046395
amide biosynthetic process	Gene Ontology	GO:0043604	2	235	0.320407	0.49173	tr|A0A0J5PRN6|A0A0J5PRN6_ASPFM|tr|A0A0J5SIW4|A0A0J5SIW4_ASPFM	http://amigo.geneontology.org/cgi-bin/amigo/term_details?term=GO:0043604
catalytic complex	Gene Ontology	GO:1902494	2	236	0.322204	0.492281	tr|A0A0J5PW10|A0A0J5PW10_ASPFM|tr|A0A0J5PSR3|A0A0J5PSR3_ASPFM	http://amigo.geneontology.org/cgi-bin/amigo/term_details?term=GO:1902494
cytoplasm	Gene Ontology	GO:0005737	13	2298	0.322416	0.492281	tr|A0A0J5Q407|A0A0J5Q407_ASPFM|tr|A0A0J5PLL4|A0A0J5PLL4_ASPFM|tr|A0A0J5PPW1|A0A0J5PPW1_ASPFM|tr|A0A0J5SDI5|A0A0J5SDI5_ASPFM|tr|A0A0J5PW10|A0A0J5PW10_ASPFM|tr|A0A0J5PT75|A0A0J5PT75_ASPFM|tr|A0A0J5SIW4|A0A0J5SIW4_ASPFM|tr|A0A0J5PSR3|A0A0J5PSR3_ASPFM|tr|A0A0J5PRN6|A0A0J5PRN6_ASPFM|tr|A0A0J5PYR8|A0A0J5PYR8_ASPFM|tr|A0A0J5SD58|A0A0J5SD58_ASPFM|tr|A0A0J5PFD8|A0A0J5PFD8_ASPFM|tr|A0A0J5PI87|A0A0J5PI87_AS…	http://amigo.geneontology.org/cgi-bin/amigo/term_details?term=GO:0005737
fungal-type cell wall organization	Gene Ontology	GO:0031505	1	80	0.326999	0.498006	tr|A0A0J5PFD8|A0A0J5PFD8_ASPFM	http://amigo.geneontology.org/cgi-bin/amigo/term_details?term=GO:0031505
cellular response to abiotic stimulus	Gene Ontology	GO:0071214	1	81	0.330295	0.501747	tr|A0A0J5PLL4|A0A0J5PLL4_ASPFM	http://amigo.geneontology.org/cgi-bin/amigo/term_details?term=GO:0071214
carbohydrate derivative metabolic process	Gene Ontology	GO:1901135	2	242	0.33296	0.504164	tr|A0A0J5PSR3|A0A0J5PSR3_ASPFM|tr|A0A0J5PPW1|A0A0J5PPW1_ASPFM	http://amigo.geneontology.org/cgi-bin/amigo/term_details?term=GO:1901135
nucleocytoplasmic transport	Gene Ontology	GO:0006913	1	82	0.333576	0.504164	tr|A0A0J5SD58|A0A0J5SD58_ASPFM	http://amigo.geneontology.org/cgi-bin/amigo/term_details?term=GO:0006913
nuclear transport	Gene Ontology	GO:0051169	1	83	0.336841	0.507484	tr|A0A0J5SD58|A0A0J5SD58_ASPFM	http://amigo.geneontology.org/cgi-bin/amigo/term_details?term=GO:0051169
macromolecule metabolic process	Gene Ontology	GO:0043170	9	1545	0.338282	0.507484	tr|A0A0J5Q407|A0A0J5Q407_ASPFM|tr|A0A0J5PW10|A0A0J5PW10_ASPFM|tr|A0A0J5SIW4|A0A0J5SIW4_ASPFM|tr|A0A0J5PVX0|A0A0J5PVX0_ASPFM|tr|A0A0J5PSK8|A0A0J5PSK8_ASPFM|tr|A0A0J5PRN6|A0A0J5PRN6_ASPFM|tr|A0A0J5PYR8|A0A0J5PYR8_ASPFM|tr|A0A0J5SY44|A0A0J5SY44_ASPFM|tr|A0A0J5PLR9|A0A0J5PLR9_ASPFM	http://amigo.geneontology.org/cgi-bin/amigo/term_details?term=GO:0043170
substrate-specific transmembrane transporter activity	Gene Ontology	GO:0022891	2	245	0.338323	0.507484	tr|A0A0J5PSR3|A0A0J5PSR3_ASPFM|tr|A0A0J5PPW1|A0A0J5PPW1_ASPFM	http://amigo.geneontology.org/cgi-bin/amigo/term_details?term=GO:0022891
organelle envelope	Gene Ontology	GO:0031967	2	246	0.340107	0.508883	tr|A0A0J5PSR3|A0A0J5PSR3_ASPFM|tr|A0A0J5PPW1|A0A0J5PPW1_ASPFM	http://amigo.geneontology.org/cgi-bin/amigo/term_details?term=GO:0031967
envelope	Gene Ontology	GO:0031975	2	247	0.341891	0.510272	tr|A0A0J5PSR3|A0A0J5PSR3_ASPFM|tr|A0A0J5PPW1|A0A0J5PPW1_ASPFM	http://amigo.geneontology.org/cgi-bin/amigo/term_details?term=GO:0031975
regulation of catalytic activity	Gene Ontology	GO:0050790	1	85	0.343323	0.511132	tr|A0A0J5SIW4|A0A0J5SIW4_ASPFM	http://amigo.geneontology.org/cgi-bin/amigo/term_details?term=GO:0050790
regulation of growth	Gene Ontology	GO:0040008	1	87	0.349744	0.516824	tr|A0A0J5PSR3|A0A0J5PSR3_ASPFM	http://amigo.geneontology.org/cgi-bin/amigo/term_details?term=GO:0040008
external encapsulating structure organization	Gene Ontology	GO:0045229	1	87	0.349744	0.516824	tr|A0A0J5PFD8|A0A0J5PFD8_ASPFM	http://amigo.geneontology.org/cgi-bin/amigo/term_details?term=GO:0045229
cell wall organization	Gene Ontology	GO:0071555	1	87	0.349744	0.516824	tr|A0A0J5PFD8|A0A0J5PFD8_ASPFM	http://amigo.geneontology.org/cgi-bin/amigo/term_details?term=GO:0071555
organic acid catabolic process	Gene Ontology	GO:0016054	1	90	0.35926	0.527542	tr|A0A0J5PW10|A0A0J5PW10_ASPFM	http://amigo.geneontology.org/cgi-bin/amigo/term_details?term=GO:0016054
positive regulation of cellular process	Gene Ontology	GO:0048522	2	257	0.359647	0.527542	tr|A0A0J5PRN6|A0A0J5PRN6_ASPFM|tr|A0A0J5SIW4|A0A0J5SIW4_ASPFM	http://amigo.geneontology.org/cgi-bin/amigo/term_details?term=GO:0048522
mitochondrial part	Gene Ontology	GO:0044429	2	258	0.361415	0.528835	tr|A0A0J5PSR3|A0A0J5PSR3_ASPFM|tr|A0A0J5PPW1|A0A0J5PPW1_ASPFM	http://amigo.geneontology.org/cgi-bin/amigo/term_details?term=GO:0044429
organonitrogen compound catabolic process	Gene Ontology	GO:1901565	1	91	0.362401	0.528982	tr|A0A0J5PW10|A0A0J5PW10_ASPFM	http://amigo.geneontology.org/cgi-bin/amigo/term_details?term=GO:1901565
cell division	Gene Ontology	GO:0051301	1	92	0.365528	0.530949	tr|A0A0J5SD58|A0A0J5SD58_ASPFM	http://amigo.geneontology.org/cgi-bin/amigo/term_details?term=GO:0051301
molecular function regulator	Gene Ontology	GO:0098772	1	92	0.365528	0.530949	tr|A0A0J5SIW4|A0A0J5SIW4_ASPFM	http://amigo.geneontology.org/cgi-bin/amigo/term_details?term=GO:0098772
multi-organism cellular process	Gene Ontology	GO:0044764	1	93	0.368639	0.534169	tr|A0A0J5SD58|A0A0J5SD58_ASPFM	http://amigo.geneontology.org/cgi-bin/amigo/term_details?term=GO:0044764
lipid metabolic process	Gene Ontology	GO:0006629	2	263	0.370225	0.534762	tr|A0A0J5SD58|A0A0J5SD58_ASPFM|tr|A0A0J5PLL4|A0A0J5PLL4_ASPFM	http://amigo.geneontology.org/cgi-bin/amigo/term_details?term=GO:0006629
regulation of mitotic cell cycle	Gene Ontology	GO:0007346	1	94	0.371736	0.534762	tr|A0A0J5PRN6|A0A0J5PRN6_ASPFM	http://amigo.geneontology.org/cgi-bin/amigo/term_details?term=GO:0007346
methyltransferase activity	Gene Ontology	GO:0008168	1	94	0.371736	0.534762	tr|A0A0J5PYR8|A0A0J5PYR8_ASPFM	http://amigo.geneontology.org/cgi-bin/amigo/term_details?term=GO:0008168
cellular protein metabolic process	Gene Ontology	GO:0044267	4	633	0.374439	0.535325	tr|A0A0J5PW10|A0A0J5PW10_ASPFM|tr|A0A0J5PRN6|A0A0J5PRN6_ASPFM|tr|A0A0J5SIW4|A0A0J5SIW4_ASPFM|tr|A0A0J5PYR8|A0A0J5PYR8_ASPFM	http://amigo.geneontology.org/cgi-bin/amigo/term_details?term=GO:0044267
electron carrier activity	Gene Ontology	GO:0009055	1	95	0.374817	0.535325	tr|A0A0J5PPW1|A0A0J5PPW1_ASPFM	http://amigo.geneontology.org/cgi-bin/amigo/term_details?term=GO:0009055
mitotic nuclear division	Gene Ontology	GO:0007067	1	96	0.377884	0.538102	tr|A0A0J5SD58|A0A0J5SD58_ASPFM	http://amigo.geneontology.org/cgi-bin/amigo/term_details?term=GO:0007067
substrate-specific transporter activity	Gene Ontology	GO:0022892	2	268	0.378991	0.538102	tr|A0A0J5PSR3|A0A0J5PSR3_ASPFM|tr|A0A0J5PPW1|A0A0J5PPW1_ASPFM	http://amigo.geneontology.org/cgi-bin/amigo/term_details?term=GO:0022892
ribosomal subunit	Gene Ontology	GO:0044391	1	97	0.380936	0.538102	tr|A0A0J5SIW4|A0A0J5SIW4_ASPFM	http://amigo.geneontology.org/cgi-bin/amigo/term_details?term=GO:0044391
non-membrane-bounded organelle	Gene Ontology	GO:0043228	4	640	0.382332	0.538102	tr|A0A0J5PRN6|A0A0J5PRN6_ASPFM|tr|A0A0J5SD58|A0A0J5SD58_ASPFM|tr|A0A0J5SIW4|A0A0J5SIW4_ASPFM|tr|A0A0J5PI87|A0A0J5PI87_ASPFM	http://amigo.geneontology.org/cgi-bin/amigo/term_details?term=GO:0043228
intracellular non-membrane-bounded organelle	Gene Ontology	GO:0043232	4	640	0.382332	0.538102	tr|A0A0J5PRN6|A0A0J5PRN6_ASPFM|tr|A0A0J5SD58|A0A0J5SD58_ASPFM|tr|A0A0J5SIW4|A0A0J5SIW4_ASPFM|tr|A0A0J5PI87|A0A0J5PI87_ASPFM	http://amigo.geneontology.org/cgi-bin/amigo/term_details?term=GO:0043232
regulation of molecular function	Gene Ontology	GO:0065009	1	98	0.383974	0.538102	tr|A0A0J5SIW4|A0A0J5SIW4_ASPFM	http://amigo.geneontology.org/cgi-bin/amigo/term_details?term=GO:0065009
cellular amide metabolic process	Gene Ontology	GO:0043603	2	271	0.384228	0.538102	tr|A0A0J5PRN6|A0A0J5PRN6_ASPFM|tr|A0A0J5SIW4|A0A0J5SIW4_ASPFM	http://amigo.geneontology.org/cgi-bin/amigo/term_details?term=GO:0043603
conidium formation	Gene Ontology	GO:0048315	1	99	0.386997	0.538102	tr|A0A0J5PSR3|A0A0J5PSR3_ASPFM	http://amigo.geneontology.org/cgi-bin/amigo/term_details?term=GO:0048315
negative regulation of cell cycle	Gene Ontology	GO:0045786	1	99	0.386997	0.538102	tr|A0A0J5PRN6|A0A0J5PRN6_ASPFM	http://amigo.geneontology.org/cgi-bin/amigo/term_details?term=GO:0045786
cellular protein localization	Gene Ontology	GO:0034613	2	273	0.387709	0.538102	tr|A0A0J5SD58|A0A0J5SD58_ASPFM|tr|A0A0J5PI87|A0A0J5PI87_ASPFM	http://amigo.geneontology.org/cgi-bin/amigo/term_details?term=GO:0034613
mitochondrial matrix	Gene Ontology	GO:0005759	1	100	0.390005	0.538102	tr|A0A0J5PSR3|A0A0J5PSR3_ASPFM	http://amigo.geneontology.org/cgi-bin/amigo/term_details?term=GO:0005759
structural constituent of ribosome	Gene Ontology	GO:0003735	1	100	0.390005	0.538102	tr|A0A0J5SIW4|A0A0J5SIW4_ASPFM	http://amigo.geneontology.org/cgi-bin/amigo/term_details?term=GO:0003735
organelle	Gene Ontology	GO:0043226	14	2606	0.390493	0.538102	tr|A0A0J5Q407|A0A0J5Q407_ASPFM|tr|A0A0J5PLL4|A0A0J5PLL4_ASPFM|tr|A0A0J5PPW1|A0A0J5PPW1_ASPFM|tr|A0A0J5SDI5|A0A0J5SDI5_ASPFM|tr|A0A0J5PW10|A0A0J5PW10_ASPFM|tr|A0A0J5PT75|A0A0J5PT75_ASPFM|tr|A0A0J5SIW4|A0A0J5SIW4_ASPFM|tr|A0A0J5PSR3|A0A0J5PSR3_ASPFM|tr|A0A0J5PRN6|A0A0J5PRN6_ASPFM|tr|A0A0J5PM30|A0A0J5PM30_ASPFM|tr|A0A0J5PYR8|A0A0J5PYR8_ASPFM|tr|A0A0J5SD58|A0A0J5SD58_ASPFM|tr|A0A0J5PFD8|A0A0J5PFD8_AS…	http://amigo.geneontology.org/cgi-bin/amigo/term_details?term=GO:0043226
intracellular organelle	Gene Ontology	GO:0043229	14	2606	0.390493	0.538102	tr|A0A0J5Q407|A0A0J5Q407_ASPFM|tr|A0A0J5PLL4|A0A0J5PLL4_ASPFM|tr|A0A0J5PPW1|A0A0J5PPW1_ASPFM|tr|A0A0J5SDI5|A0A0J5SDI5_ASPFM|tr|A0A0J5PW10|A0A0J5PW10_ASPFM|tr|A0A0J5PT75|A0A0J5PT75_ASPFM|tr|A0A0J5SIW4|A0A0J5SIW4_ASPFM|tr|A0A0J5PSR3|A0A0J5PSR3_ASPFM|tr|A0A0J5PRN6|A0A0J5PRN6_ASPFM|tr|A0A0J5PM30|A0A0J5PM30_ASPFM|tr|A0A0J5PYR8|A0A0J5PYR8_ASPFM|tr|A0A0J5SD58|A0A0J5SD58_ASPFM|tr|A0A0J5PFD8|A0A0J5PFD8_AS…	http://amigo.geneontology.org/cgi-bin/amigo/term_details?term=GO:0043229
intracellular transport	Gene Ontology	GO:0046907	2	275	0.391183	0.538102	tr|A0A0J5SD58|A0A0J5SD58_ASPFM|tr|A0A0J5PI87|A0A0J5PI87_ASPFM	http://amigo.geneontology.org/cgi-bin/amigo/term_details?term=GO:0046907
cellular macromolecule localization	Gene Ontology	GO:0070727	2	276	0.392917	0.53812	tr|A0A0J5SD58|A0A0J5SD58_ASPFM|tr|A0A0J5PI87|A0A0J5PI87_ASPFM	http://amigo.geneontology.org/cgi-bin/amigo/term_details?term=GO:0070727
transferase activity, transferring one-carbon groups	Gene Ontology	GO:0016741	1	101	0.392999	0.53812	tr|A0A0J5PYR8|A0A0J5PYR8_ASPFM	http://amigo.geneontology.org/cgi-bin/amigo/term_details?term=GO:0016741
cell communication	Gene Ontology	GO:0007154	2	283	0.404993	0.552335	tr|A0A0J5PRN6|A0A0J5PRN6_ASPFM|tr|A0A0J5PLL4|A0A0J5PLL4_ASPFM	http://amigo.geneontology.org/cgi-bin/amigo/term_details?term=GO:0007154
cytoskeleton organization	Gene Ontology	GO:0007010	1	106	0.407754	0.552335	tr|A0A0J5SD58|A0A0J5SD58_ASPFM	http://amigo.geneontology.org/cgi-bin/amigo/term_details?term=GO:0007010
alpha-amino acid metabolic process	Gene Ontology	GO:1901605	1	106	0.407754	0.552335	tr|A0A0J5PW10|A0A0J5PW10_ASPFM	http://amigo.geneontology.org/cgi-bin/amigo/term_details?term=GO:1901605
carboxylic acid metabolic process	Gene Ontology	GO:0019752	2	285	0.408424	0.552335	tr|A0A0J5PW10|A0A0J5PW10_ASPFM|tr|A0A0J5PLL4|A0A0J5PLL4_ASPFM	http://amigo.geneontology.org/cgi-bin/amigo/term_details?term=GO:0019752
heme binding	Gene Ontology	GO:0020037	1	107	0.410663	0.552335	tr|A0A0J5PLL4|A0A0J5PLL4_ASPFM	http://amigo.geneontology.org/cgi-bin/amigo/term_details?term=GO:0020037
tetrapyrrole binding	Gene Ontology	GO:0046906	1	107	0.410663	0.552335	tr|A0A0J5PLL4|A0A0J5PLL4_ASPFM	http://amigo.geneontology.org/cgi-bin/amigo/term_details?term=GO:0046906
fungal-type cell wall organization or biogenesis	Gene Ontology	GO:0071852	1	107	0.410663	0.552335	tr|A0A0J5PFD8|A0A0J5PFD8_ASPFM	http://amigo.geneontology.org/cgi-bin/amigo/term_details?term=GO:0071852
small molecule metabolic process	Gene Ontology	GO:0044281	4	667	0.412697	0.552335	tr|A0A0J5PW10|A0A0J5PW10_ASPFM|tr|A0A0J5PSR3|A0A0J5PSR3_ASPFM|tr|A0A0J5PLL4|A0A0J5PLL4_ASPFM|tr|A0A0J5PPW1|A0A0J5PPW1_ASPFM	http://amigo.geneontology.org/cgi-bin/amigo/term_details?term=GO:0044281
protein kinase activity	Gene Ontology	GO:0004672	1	108	0.413557	0.552335	tr|A0A0J5PRN6|A0A0J5PRN6_ASPFM	http://amigo.geneontology.org/cgi-bin/amigo/term_details?term=GO:0004672
oxidoreductase activity, acting on paired donors, with incorporation or reduction of molecular oxygen	Gene Ontology	GO:0016705	1	108	0.413557	0.552335	tr|A0A0J5PLL4|A0A0J5PLL4_ASPFM	http://amigo.geneontology.org/cgi-bin/amigo/term_details?term=GO:0016705
single-organism membrane organization	Gene Ontology	GO:0044802	1	108	0.413557	0.552335	tr|A0A0J5SD58|A0A0J5SD58_ASPFM	http://amigo.geneontology.org/cgi-bin/amigo/term_details?term=GO:0044802
single-organism intracellular transport	Gene Ontology	GO:1902582	1	109	0.416438	0.554941	tr|A0A0J5SD58|A0A0J5SD58_ASPFM	http://amigo.geneontology.org/cgi-bin/amigo/term_details?term=GO:1902582
transmembrane transporter activity	Gene Ontology	GO:0022857	2	292	0.42036	0.55892	tr|A0A0J5PSR3|A0A0J5PSR3_ASPFM|tr|A0A0J5PPW1|A0A0J5PPW1_ASPFM	http://amigo.geneontology.org/cgi-bin/amigo/term_details?term=GO:0022857
oxoacid metabolic process	Gene Ontology	GO:0043436	2	295	0.42544	0.563166	tr|A0A0J5PW10|A0A0J5PW10_ASPFM|tr|A0A0J5PLL4|A0A0J5PLL4_ASPFM	http://amigo.geneontology.org/cgi-bin/amigo/term_details?term=GO:0043436
protein localization	Gene Ontology	GO:0008104	2	295	0.42544	0.563166	tr|A0A0J5SD58|A0A0J5SD58_ASPFM|tr|A0A0J5PI87|A0A0J5PI87_ASPFM	http://amigo.geneontology.org/cgi-bin/amigo/term_details?term=GO:0008104
positive regulation of biological process	Gene Ontology	GO:0048518	2	296	0.427129	0.56382	tr|A0A0J5PRN6|A0A0J5PRN6_ASPFM|tr|A0A0J5SIW4|A0A0J5SIW4_ASPFM	http://amigo.geneontology.org/cgi-bin/amigo/term_details?term=GO:0048518
small molecule catabolic process	Gene Ontology	GO:0044282	1	113	0.427823	0.56382	tr|A0A0J5PW10|A0A0J5PW10_ASPFM	http://amigo.geneontology.org/cgi-bin/amigo/term_details?term=GO:0044282
establishment of localization in cell	Gene Ontology	GO:0051649	2	298	0.430499	0.565031	tr|A0A0J5SD58|A0A0J5SD58_ASPFM|tr|A0A0J5PI87|A0A0J5PI87_ASPFM	http://amigo.geneontology.org/cgi-bin/amigo/term_details?term=GO:0051649
carboxylic acid biosynthetic process	Gene Ontology	GO:0046394	1	114	0.430635	0.565031	tr|A0A0J5PLL4|A0A0J5PLL4_ASPFM	http://amigo.geneontology.org/cgi-bin/amigo/term_details?term=GO:0046394
reproductive process	Gene Ontology	GO:0022414	2	299	0.43218	0.565815	tr|A0A0J5SD58|A0A0J5SD58_ASPFM|tr|A0A0J5PFD8|A0A0J5PFD8_ASPFM	http://amigo.geneontology.org/cgi-bin/amigo/term_details?term=GO:0022414
membrane organization	Gene Ontology	GO:0061024	1	115	0.433434	0.566214	tr|A0A0J5SD58|A0A0J5SD58_ASPFM	http://amigo.geneontology.org/cgi-bin/amigo/term_details?term=GO:0061024
cellular response to stimulus	Gene Ontology	GO:0051716	4	690	0.438375	0.571419	tr|A0A0J5PRN6|A0A0J5PRN6_ASPFM|tr|A0A0J5SD58|A0A0J5SD58_ASPFM|tr|A0A0J5PLL4|A0A0J5PLL4_ASPFM|tr|A0A0J5PFD8|A0A0J5PFD8_ASPFM	http://amigo.geneontology.org/cgi-bin/amigo/term_details?term=GO:0051716
protein metabolic process	Gene Ontology	GO:0019538	4	695	0.443924	0.577391	tr|A0A0J5PW10|A0A0J5PW10_ASPFM|tr|A0A0J5PRN6|A0A0J5PRN6_ASPFM|tr|A0A0J5SIW4|A0A0J5SIW4_ASPFM|tr|A0A0J5PYR8|A0A0J5PYR8_ASPFM	http://amigo.geneontology.org/cgi-bin/amigo/term_details?term=GO:0019538
intracellular ribonucleoprotein complex	Gene Ontology	GO:0030529	2	310	0.450505	0.582397	tr|A0A0J5PRN6|A0A0J5PRN6_ASPFM|tr|A0A0J5SIW4|A0A0J5SIW4_ASPFM	http://amigo.geneontology.org/cgi-bin/amigo/term_details?term=GO:0030529
ribonucleoprotein complex	Gene Ontology	GO:1990904	2	310	0.450505	0.582397	tr|A0A0J5PRN6|A0A0J5PRN6_ASPFM|tr|A0A0J5SIW4|A0A0J5SIW4_ASPFM	http://amigo.geneontology.org/cgi-bin/amigo/term_details?term=GO:1990904
regulation of response to stimulus	Gene Ontology	GO:0048583	1	122	0.452651	0.582397	tr|A0A0J5PRN6|A0A0J5PRN6_ASPFM	http://amigo.geneontology.org/cgi-bin/amigo/term_details?term=GO:0048583
protein targeting	Gene Ontology	GO:0006605	1	122	0.452651	0.582397	tr|A0A0J5SD58|A0A0J5SD58_ASPFM	http://amigo.geneontology.org/cgi-bin/amigo/term_details?term=GO:0006605
monocarboxylic acid metabolic process	Gene Ontology	GO:0032787	1	122	0.452651	0.582397	tr|A0A0J5PLL4|A0A0J5PLL4_ASPFM	http://amigo.geneontology.org/cgi-bin/amigo/term_details?term=GO:0032787
establishment of protein localization to organelle	Gene Ontology	GO:0072594	1	123	0.455343	0.584602	tr|A0A0J5SD58|A0A0J5SD58_ASPFM	http://amigo.geneontology.org/cgi-bin/amigo/term_details?term=GO:0072594
organophosphate biosynthetic process	Gene Ontology	GO:0090407	1	125	0.46069	0.588933	tr|A0A0J5SD58|A0A0J5SD58_ASPFM	http://amigo.geneontology.org/cgi-bin/amigo/term_details?term=GO:0090407
positive regulation of macromolecule metabolic process	Gene Ontology	GO:0010604	1	125	0.46069	0.588933	tr|A0A0J5SIW4|A0A0J5SIW4_ASPFM	http://amigo.geneontology.org/cgi-bin/amigo/term_details?term=GO:0010604
catalytic activity	Gene Ontology	GO:0003824	14	2724	0.464617	0.592684	tr|A0A0J5PTV0|A0A0J5PTV0_ASPFM|tr|A0A0J5PPW1|A0A0J5PPW1_ASPFM|tr|A0A0J5PSK8|A0A0J5PSK8_ASPFM|tr|A0A0J5PW10|A0A0J5PW10_ASPFM|tr|A0A0J5PVX0|A0A0J5PVX0_ASPFM|tr|A0A0J5PJV8|A0A0J5PJV8_ASPFM|tr|A0A0J5PRN6|A0A0J5PRN6_ASPFM|tr|A0A0J5PLR9|A0A0J5PLR9_ASPFM|tr|A0A0J5PYR8|A0A0J5PYR8_ASPFM|tr|A0A0J5PWD4|A0A0J5PWD4_ASPFM|tr|A0A0J5PLL4|A0A0J5PLL4_ASPFM|tr|A0A0J5SY44|A0A0J5SY44_ASPFM|tr|A0A0J5PRC2|A0A0J5PRC2_AS…	http://amigo.geneontology.org/cgi-bin/amigo/term_details?term=GO:0003824
organelle membrane	Gene Ontology	GO:0031090	2	325	0.474974	0.602594	tr|A0A0J5PSR3|A0A0J5PSR3_ASPFM|tr|A0A0J5PPW1|A0A0J5PPW1_ASPFM	http://amigo.geneontology.org/cgi-bin/amigo/term_details?term=GO:0031090
single-organism cellular localization	Gene Ontology	GO:1902580	1	131	0.476423	0.602594	tr|A0A0J5SD58|A0A0J5SD58_ASPFM	http://amigo.geneontology.org/cgi-bin/amigo/term_details?term=GO:1902580
regulation of cell cycle process	Gene Ontology	GO:0010564	1	131	0.476423	0.602594	tr|A0A0J5PRN6|A0A0J5PRN6_ASPFM	http://amigo.geneontology.org/cgi-bin/amigo/term_details?term=GO:0010564
lyase activity	Gene Ontology	GO:0016829	1	131	0.476423	0.602594	tr|A0A0J5PLR9|A0A0J5PLR9_ASPFM	http://amigo.geneontology.org/cgi-bin/amigo/term_details?term=GO:0016829
transporter activity	Gene Ontology	GO:0005215	2	328	0.479792	0.605573	tr|A0A0J5PSR3|A0A0J5PSR3_ASPFM|tr|A0A0J5PPW1|A0A0J5PPW1_ASPFM	http://amigo.geneontology.org/cgi-bin/amigo/term_details?term=GO:0005215
cellular response to chemical stimulus	Gene Ontology	GO:0070887	2	329	0.481393	0.606311	tr|A0A0J5SD58|A0A0J5SD58_ASPFM|tr|A0A0J5PFD8|A0A0J5PFD8_ASPFM	http://amigo.geneontology.org/cgi-bin/amigo/term_details?term=GO:0070887
macromolecule localization	Gene Ontology	GO:0033036	2	330	0.48299	0.607042	tr|A0A0J5SD58|A0A0J5SD58_ASPFM|tr|A0A0J5PI87|A0A0J5PI87_ASPFM	http://amigo.geneontology.org/cgi-bin/amigo/term_details?term=GO:0033036
hyphal growth	Gene Ontology	GO:0030448	1	134	0.48412	0.607184	tr|A0A0J5PRN6|A0A0J5PRN6_ASPFM	http://amigo.geneontology.org/cgi-bin/amigo/term_details?term=GO:0030448
cellular component assembly	Gene Ontology	GO:0022607	2	332	0.486177	0.608485	tr|A0A0J5SD58|A0A0J5SD58_ASPFM|tr|A0A0J5PFD8|A0A0J5PFD8_ASPFM	http://amigo.geneontology.org/cgi-bin/amigo/term_details?term=GO:0022607
organic substance transport	Gene Ontology	GO:0071702	2	333	0.487765	0.609197	tr|A0A0J5SD58|A0A0J5SD58_ASPFM|tr|A0A0J5PI87|A0A0J5PI87_ASPFM	http://amigo.geneontology.org/cgi-bin/amigo/term_details?term=GO:0071702
multi-organism process	Gene Ontology	GO:0051704	2	334	0.489351	0.609901	tr|A0A0J5SD58|A0A0J5SD58_ASPFM|tr|A0A0J5PFD8|A0A0J5PFD8_ASPFM	http://amigo.geneontology.org/cgi-bin/amigo/term_details?term=GO:0051704
structural molecule activity	Gene Ontology	GO:0005198	1	137	0.491706	0.611559	tr|A0A0J5SIW4|A0A0J5SIW4_ASPFM	http://amigo.geneontology.org/cgi-bin/amigo/term_details?term=GO:0005198
nuclear division	Gene Ontology	GO:0000280	1	140	0.499183	0.619568	tr|A0A0J5SD58|A0A0J5SD58_ASPFM	http://amigo.geneontology.org/cgi-bin/amigo/term_details?term=GO:0000280
oxidoreductase activity	Gene Ontology	GO:0016491	4	752	0.505997	0.626722	tr|A0A0J5PW10|A0A0J5PW10_ASPFM|tr|A0A0J5PSR3|A0A0J5PSR3_ASPFM|tr|A0A0J5PLL4|A0A0J5PLL4_ASPFM|tr|A0A0J5PPW1|A0A0J5PPW1_ASPFM	http://amigo.geneontology.org/cgi-bin/amigo/term_details?term=GO:0016491
intracellular	Gene Ontology	GO:0005622	15	2998	0.508896	0.627819	tr|A0A0J5Q407|A0A0J5Q407_ASPFM|tr|A0A0J5PLL4|A0A0J5PLL4_ASPFM|tr|A0A0J5PPW1|A0A0J5PPW1_ASPFM|tr|A0A0J5SDI5|A0A0J5SDI5_ASPFM|tr|A0A0J5PW10|A0A0J5PW10_ASPFM|tr|A0A0J5PT75|A0A0J5PT75_ASPFM|tr|A0A0J5SIW4|A0A0J5SIW4_ASPFM|tr|A0A0J5PFD8|A0A0J5PFD8_ASPFM|tr|A0A0J5PSR3|A0A0J5PSR3_ASPFM|tr|A0A0J5PRN6|A0A0J5PRN6_ASPFM|tr|A0A0J5PM30|A0A0J5PM30_ASPFM|tr|A0A0J5PYR8|A0A0J5PYR8_ASPFM|tr|A0A0J5SD58|A0A0J5SD58_AS…	http://amigo.geneontology.org/cgi-bin/amigo/term_details?term=GO:0005622
phosphotransferase activity, alcohol group as acceptor	Gene Ontology	GO:0016773	1	144	0.508985	0.627819	tr|A0A0J5PRN6|A0A0J5PRN6_ASPFM	http://amigo.geneontology.org/cgi-bin/amigo/term_details?term=GO:0016773
organelle fission	Gene Ontology	GO:0048285	1	147	0.516214	0.635422	tr|A0A0J5SD58|A0A0J5SD58_ASPFM	http://amigo.geneontology.org/cgi-bin/amigo/term_details?term=GO:0048285
cellular amino acid metabolic process	Gene Ontology	GO:0006520	1	149	0.520975	0.639963	tr|A0A0J5PW10|A0A0J5PW10_ASPFM	http://amigo.geneontology.org/cgi-bin/amigo/term_details?term=GO:0006520
kinase activity	Gene Ontology	GO:0016301	1	151	0.52569	0.644428	tr|A0A0J5PRN6|A0A0J5PRN6_ASPFM	http://amigo.geneontology.org/cgi-bin/amigo/term_details?term=GO:0016301
cellular response to DNA damage stimulus	Gene Ontology	GO:0006974	1	152	0.52803	0.645971	tr|A0A0J5PRN6|A0A0J5PRN6_ASPFM	http://amigo.geneontology.org/cgi-bin/amigo/term_details?term=GO:0006974
cell wall organization or biogenesis	Gene Ontology	GO:0071554	1	153	0.530359	0.647494	tr|A0A0J5PFD8|A0A0J5PFD8_ASPFM	http://amigo.geneontology.org/cgi-bin/amigo/term_details?term=GO:0071554
positive regulation of cellular metabolic process	Gene Ontology	GO:0031325	1	155	0.534984	0.651142	tr|A0A0J5SIW4|A0A0J5SIW4_ASPFM	http://amigo.geneontology.org/cgi-bin/amigo/term_details?term=GO:0031325
positive regulation of metabolic process	Gene Ontology	GO:0009893	1	159	0.544099	0.660218	tr|A0A0J5SIW4|A0A0J5SIW4_ASPFM	http://amigo.geneontology.org/cgi-bin/amigo/term_details?term=GO:0009893
protein localization to organelle	Gene Ontology	GO:0033365	1	163	0.55304	0.669253	tr|A0A0J5SD58|A0A0J5SD58_ASPFM	http://amigo.geneontology.org/cgi-bin/amigo/term_details?term=GO:0033365
oxidation-reduction process	Gene Ontology	GO:0055114	3	589	0.555223	0.669253	tr|A0A0J5PSR3|A0A0J5PSR3_ASPFM|tr|A0A0J5PLL4|A0A0J5PLL4_ASPFM|tr|A0A0J5PPW1|A0A0J5PPW1_ASPFM	http://amigo.geneontology.org/cgi-bin/amigo/term_details?term=GO:0055114
response to abiotic stimulus	Gene Ontology	GO:0009628	1	164	0.555248	0.669253	tr|A0A0J5PLL4|A0A0J5PLL4_ASPFM	http://amigo.geneontology.org/cgi-bin/amigo/term_details?term=GO:0009628
response to stimulus	Gene Ontology	GO:0050896	4	800	0.556029	0.669253	tr|A0A0J5PRN6|A0A0J5PRN6_ASPFM|tr|A0A0J5SD58|A0A0J5SD58_ASPFM|tr|A0A0J5PLL4|A0A0J5PLL4_ASPFM|tr|A0A0J5PFD8|A0A0J5PFD8_ASPFM	http://amigo.geneontology.org/cgi-bin/amigo/term_details?term=GO:0050896
response to chemical	Gene Ontology	GO:0042221	2	383	0.563322	0.676091	tr|A0A0J5SD58|A0A0J5SD58_ASPFM|tr|A0A0J5PFD8|A0A0J5PFD8_ASPFM	http://amigo.geneontology.org/cgi-bin/amigo/term_details?term=GO:0042221
Golgi apparatus	Gene Ontology	GO:0005794	1	168	0.563975	0.676091	tr|A0A0J5PT75|A0A0J5PT75_ASPFM	http://amigo.geneontology.org/cgi-bin/amigo/term_details?term=GO:0005794
intracellular part	Gene Ontology	GO:0044424	14	2901	0.574935	0.687842	tr|A0A0J5Q407|A0A0J5Q407_ASPFM|tr|A0A0J5PLL4|A0A0J5PLL4_ASPFM|tr|A0A0J5PPW1|A0A0J5PPW1_ASPFM|tr|A0A0J5SDI5|A0A0J5SDI5_ASPFM|tr|A0A0J5PW10|A0A0J5PW10_ASPFM|tr|A0A0J5PT75|A0A0J5PT75_ASPFM|tr|A0A0J5SIW4|A0A0J5SIW4_ASPFM|tr|A0A0J5PSR3|A0A0J5PSR3_ASPFM|tr|A0A0J5PRN6|A0A0J5PRN6_ASPFM|tr|A0A0J5PM30|A0A0J5PM30_ASPFM|tr|A0A0J5PYR8|A0A0J5PYR8_ASPFM|tr|A0A0J5SD58|A0A0J5SD58_ASPFM|tr|A0A0J5PFD8|A0A0J5PFD8_AS…	http://amigo.geneontology.org/cgi-bin/amigo/term_details?term=GO:0044424
organic acid metabolic process	Gene Ontology	GO:0006082	2	392	0.576082	0.687842	tr|A0A0J5PW10|A0A0J5PW10_ASPFM|tr|A0A0J5PLL4|A0A0J5PLL4_ASPFM	http://amigo.geneontology.org/cgi-bin/amigo/term_details?term=GO:0006082
cellular localization	Gene Ontology	GO:0051641	2	395	0.580277	0.691467	tr|A0A0J5SD58|A0A0J5SD58_ASPFM|tr|A0A0J5PI87|A0A0J5PI87_ASPFM	http://amigo.geneontology.org/cgi-bin/amigo/term_details?term=GO:0051641
cellular response to stress	Gene Ontology	GO:0033554	2	399	0.585824	0.696626	tr|A0A0J5PRN6|A0A0J5PRN6_ASPFM|tr|A0A0J5PLL4|A0A0J5PLL4_ASPFM	http://amigo.geneontology.org/cgi-bin/amigo/term_details?term=GO:0033554
metabolic process	Gene Ontology	GO:0008152	15	3127	0.58694	0.696626	tr|A0A0J5Q407|A0A0J5Q407_ASPFM|tr|A0A0J5PSR3|A0A0J5PSR3_ASPFM|tr|A0A0J5PPW1|A0A0J5PPW1_ASPFM|tr|A0A0J5PSK8|A0A0J5PSK8_ASPFM|tr|A0A0J5PW10|A0A0J5PW10_ASPFM|tr|A0A0J5SIW4|A0A0J5SIW4_ASPFM|tr|A0A0J5PVX0|A0A0J5PVX0_ASPFM|tr|A0A0J5PTV0|A0A0J5PTV0_ASPFM|tr|A0A0J5PRN6|A0A0J5PRN6_ASPFM|tr|A0A0J5PWD4|A0A0J5PWD4_ASPFM|tr|A0A0J5PYR8|A0A0J5PYR8_ASPFM|tr|A0A0J5SD58|A0A0J5SD58_ASPFM|tr|A0A0J5PLL4|A0A0J5PLL4_AS…	http://amigo.geneontology.org/cgi-bin/amigo/term_details?term=GO:0008152
organic acid biosynthetic process	Gene Ontology	GO:0016053	1	186	0.601216	0.712154	tr|A0A0J5PLL4|A0A0J5PLL4_ASPFM	http://amigo.geneontology.org/cgi-bin/amigo/term_details?term=GO:0016053
single-organism catabolic process	Gene Ontology	GO:0044712	1	192	0.612923	0.724584	tr|A0A0J5PW10|A0A0J5PW10_ASPFM	http://amigo.geneontology.org/cgi-bin/amigo/term_details?term=GO:0044712
binding	Gene Ontology	GO:0005488	10	2140	0.61845	0.729673	tr|A0A0J5PSK8|A0A0J5PSK8_ASPFM|tr|A0A0J5PPW1|A0A0J5PPW1_ASPFM|tr|A0A0J5PRN6|A0A0J5PRN6_ASPFM|tr|A0A0J5PT75|A0A0J5PT75_ASPFM|tr|A0A0J5PJV8|A0A0J5PJV8_ASPFM|tr|A0A0J5PSR3|A0A0J5PSR3_ASPFM|tr|A0A0J5SD58|A0A0J5SD58_ASPFM|tr|A0A0J5PLL4|A0A0J5PLL4_ASPFM|tr|A0A0J5PTV0|A0A0J5PTV0_ASPFM|tr|A0A0J5PRC2|A0A0J5PRC2_ASPFM	http://amigo.geneontology.org/cgi-bin/amigo/term_details?term=GO:0005488
nucleic acid binding	Gene Ontology	GO:0003676	3	675	0.649242	0.764492	tr|A0A0J5PRN6|A0A0J5PRN6_ASPFM|tr|A0A0J5PJV8|A0A0J5PJV8_ASPFM|tr|A0A0J5PRC2|A0A0J5PRC2_ASPFM	http://amigo.geneontology.org/cgi-bin/amigo/term_details?term=GO:0003676
cytosol	Gene Ontology	GO:0005829	5	1121	0.65251	0.766827	tr|A0A0J5Q407|A0A0J5Q407_ASPFM|tr|A0A0J5PRN6|A0A0J5PRN6_ASPFM|tr|A0A0J5SIW4|A0A0J5SIW4_ASPFM|tr|A0A0J5PYR8|A0A0J5PYR8_ASPFM|tr|A0A0J5SD58|A0A0J5SD58_ASPFM	http://amigo.geneontology.org/cgi-bin/amigo/term_details?term=GO:0005829
single-organism organelle organization	Gene Ontology	GO:1902589	1	218	0.659885	0.773971	tr|A0A0J5SD58|A0A0J5SD58_ASPFM	http://amigo.geneontology.org/cgi-bin/amigo/term_details?term=GO:1902589
metal ion binding	Gene Ontology	GO:0046872	3	689	0.663203	0.776337	tr|A0A0J5SD58|A0A0J5SD58_ASPFM|tr|A0A0J5PT75|A0A0J5PT75_ASPFM|tr|A0A0J5PPW1|A0A0J5PPW1_ASPFM	http://amigo.geneontology.org/cgi-bin/amigo/term_details?term=GO:0046872
regulation of biological process	Gene Ontology	GO:0050789	4	915	0.664597	0.776447	tr|A0A0J5PRN6|A0A0J5PRN6_ASPFM|tr|A0A0J5PSR3|A0A0J5PSR3_ASPFM|tr|A0A0J5SIW4|A0A0J5SIW4_ASPFM|tr|A0A0J5SD58|A0A0J5SD58_ASPFM	http://amigo.geneontology.org/cgi-bin/amigo/term_details?term=GO:0050789
cellular component biogenesis	Gene Ontology	GO:0044085	2	464	0.668634	0.779637	tr|A0A0J5SD58|A0A0J5SD58_ASPFM|tr|A0A0J5PFD8|A0A0J5PFD8_ASPFM	http://amigo.geneontology.org/cgi-bin/amigo/term_details?term=GO:0044085
cation binding	Gene Ontology	GO:0043169	3	698	0.671972	0.782003	tr|A0A0J5SD58|A0A0J5SD58_ASPFM|tr|A0A0J5PT75|A0A0J5PT75_ASPFM|tr|A0A0J5PPW1|A0A0J5PPW1_ASPFM	http://amigo.geneontology.org/cgi-bin/amigo/term_details?term=GO:0043169
membrane part	Gene Ontology	GO:0044425	3	703	0.676775	0.78606	tr|A0A0J5PSR3|A0A0J5PSR3_ASPFM|tr|A0A0J5PPW1|A0A0J5PPW1_ASPFM|tr|A0A0J5PI87|A0A0J5PI87_ASPFM	http://amigo.geneontology.org/cgi-bin/amigo/term_details?term=GO:0044425
response to stress	Gene Ontology	GO:0006950	2	473	0.679018	0.787134	tr|A0A0J5PRN6|A0A0J5PRN6_ASPFM|tr|A0A0J5PLL4|A0A0J5PLL4_ASPFM	http://amigo.geneontology.org/cgi-bin/amigo/term_details?term=GO:0006950
transferase activity, transferring phosphorus-containing groups	Gene Ontology	GO:0016772	1	232	0.682813	0.789999	tr|A0A0J5PRN6|A0A0J5PRN6_ASPFM	http://amigo.geneontology.org/cgi-bin/amigo/term_details?term=GO:0016772
organonitrogen compound biosynthetic process	Gene Ontology	GO:1901566	2	482	0.689145	0.795783	tr|A0A0J5PRN6|A0A0J5PRN6_ASPFM|tr|A0A0J5SIW4|A0A0J5SIW4_ASPFM	http://amigo.geneontology.org/cgi-bin/amigo/term_details?term=GO:1901566
intracellular membrane-bounded organelle	Gene Ontology	GO:0043231	11	2493	0.703729	0.809492	tr|A0A0J5Q407|A0A0J5Q407_ASPFM|tr|A0A0J5PLL4|A0A0J5PLL4_ASPFM|tr|A0A0J5PPW1|A0A0J5PPW1_ASPFM|tr|A0A0J5SDI5|A0A0J5SDI5_ASPFM|tr|A0A0J5PW10|A0A0J5PW10_ASPFM|tr|A0A0J5PT75|A0A0J5PT75_ASPFM|tr|A0A0J5PSR3|A0A0J5PSR3_ASPFM|tr|A0A0J5PM30|A0A0J5PM30_ASPFM|tr|A0A0J5PYR8|A0A0J5PYR8_ASPFM|tr|A0A0J5SD58|A0A0J5SD58_ASPFM|tr|A0A0J5PFD8|A0A0J5PFD8_ASPFM	http://amigo.geneontology.org/cgi-bin/amigo/term_details?term=GO:0043231
membrane-bounded organelle	Gene Ontology	GO:0043227	11	2493	0.703729	0.809492	tr|A0A0J5Q407|A0A0J5Q407_ASPFM|tr|A0A0J5PLL4|A0A0J5PLL4_ASPFM|tr|A0A0J5PPW1|A0A0J5PPW1_ASPFM|tr|A0A0J5SDI5|A0A0J5SDI5_ASPFM|tr|A0A0J5PW10|A0A0J5PW10_ASPFM|tr|A0A0J5PT75|A0A0J5PT75_ASPFM|tr|A0A0J5PSR3|A0A0J5PSR3_ASPFM|tr|A0A0J5PM30|A0A0J5PM30_ASPFM|tr|A0A0J5PYR8|A0A0J5PYR8_ASPFM|tr|A0A0J5SD58|A0A0J5SD58_ASPFM|tr|A0A0J5PFD8|A0A0J5PFD8_ASPFM	http://amigo.geneontology.org/cgi-bin/amigo/term_details?term=GO:0043227
regulation of biological quality	Gene Ontology	GO:0065008	1	251	0.711525	0.816886	tr|A0A0J5SD58|A0A0J5SD58_ASPFM	http://amigo.geneontology.org/cgi-bin/amigo/term_details?term=GO:0065008
negative regulation of cellular process	Gene Ontology	GO:0048523	1	265	0.731038	0.836455	tr|A0A0J5PRN6|A0A0J5PRN6_ASPFM	http://amigo.geneontology.org/cgi-bin/amigo/term_details?term=GO:0048523
ion binding	Gene Ontology	GO:0043167	3	764	0.731373	0.836455	tr|A0A0J5SD58|A0A0J5SD58_ASPFM|tr|A0A0J5PT75|A0A0J5PT75_ASPFM|tr|A0A0J5PPW1|A0A0J5PPW1_ASPFM	http://amigo.geneontology.org/cgi-bin/amigo/term_details?term=GO:0043167
single-organism cellular process	Gene Ontology	GO:0044763	7	1679	0.734197	0.83808	tr|A0A0J5PLL4|A0A0J5PLL4_ASPFM|tr|A0A0J5PFD8|A0A0J5PFD8_ASPFM|tr|A0A0J5PW10|A0A0J5PW10_ASPFM|tr|A0A0J5PSR3|A0A0J5PSR3_ASPFM|tr|A0A0J5PRN6|A0A0J5PRN6_ASPFM|tr|A0A0J5SD58|A0A0J5SD58_ASPFM|tr|A0A0J5PPW1|A0A0J5PPW1_ASPFM	http://amigo.geneontology.org/cgi-bin/amigo/term_details?term=GO:0044763
intracellular organelle part	Gene Ontology	GO:0044446	5	1235	0.736992	0.839665	tr|A0A0J5PSR3|A0A0J5PSR3_ASPFM|tr|A0A0J5SD58|A0A0J5SD58_ASPFM|tr|A0A0J5SIW4|A0A0J5SIW4_ASPFM|tr|A0A0J5PI87|A0A0J5PI87_ASPFM|tr|A0A0J5PPW1|A0A0J5PPW1_ASPFM	http://amigo.geneontology.org/cgi-bin/amigo/term_details?term=GO:0044446
organelle part	Gene Ontology	GO:0044422	5	1238	0.73901	0.84036	tr|A0A0J5PSR3|A0A0J5PSR3_ASPFM|tr|A0A0J5SD58|A0A0J5SD58_ASPFM|tr|A0A0J5SIW4|A0A0J5SIW4_ASPFM|tr|A0A0J5PI87|A0A0J5PI87_ASPFM|tr|A0A0J5PPW1|A0A0J5PPW1_ASPFM	http://amigo.geneontology.org/cgi-bin/amigo/term_details?term=GO:0044422
protein binding	Gene Ontology	GO:0005515	1	275	0.744179	0.844629	tr|A0A0J5SD58|A0A0J5SD58_ASPFM	http://amigo.geneontology.org/cgi-bin/amigo/term_details?term=GO:0005515
single-organism transport	Gene Ontology	GO:0044765	1	280	0.750511	0.8502	tr|A0A0J5SD58|A0A0J5SD58_ASPFM	http://amigo.geneontology.org/cgi-bin/amigo/term_details?term=GO:0044765
biological regulation	Gene Ontology	GO:0065007	4	1028	0.753144	0.851567	tr|A0A0J5PRN6|A0A0J5PRN6_ASPFM|tr|A0A0J5PSR3|A0A0J5PSR3_ASPFM|tr|A0A0J5SIW4|A0A0J5SIW4_ASPFM|tr|A0A0J5SD58|A0A0J5SD58_ASPFM	http://amigo.geneontology.org/cgi-bin/amigo/term_details?term=GO:0065007
regulation of macromolecule metabolic process	Gene Ontology	GO:0060255	2	548	0.755799	0.852953	tr|A0A0J5PRN6|A0A0J5PRN6_ASPFM|tr|A0A0J5SIW4|A0A0J5SIW4_ASPFM	http://amigo.geneontology.org/cgi-bin/amigo/term_details?term=GO:0060255
regulation of primary metabolic process	Gene Ontology	GO:0080090	2	557	0.763894	0.860186	tr|A0A0J5PRN6|A0A0J5PRN6_ASPFM|tr|A0A0J5SIW4|A0A0J5SIW4_ASPFM	http://amigo.geneontology.org/cgi-bin/amigo/term_details?term=GO:0080090
small molecule biosynthetic process	Gene Ontology	GO:0044283	1	292	0.76509	0.860186	tr|A0A0J5PLL4|A0A0J5PLL4_ASPFM	http://amigo.geneontology.org/cgi-bin/amigo/term_details?term=GO:0044283
negative regulation of biological process	Gene Ontology	GO:0048519	1	295	0.768602	0.862511	tr|A0A0J5PRN6|A0A0J5PRN6_ASPFM	http://amigo.geneontology.org/cgi-bin/amigo/term_details?term=GO:0048519
nitrogen compound metabolic process	Gene Ontology	GO:0006807	6	1523	0.7743	0.866494	tr|A0A0J5Q407|A0A0J5Q407_ASPFM|tr|A0A0J5PPW1|A0A0J5PPW1_ASPFM|tr|A0A0J5PW10|A0A0J5PW10_ASPFM|tr|A0A0J5SIW4|A0A0J5SIW4_ASPFM|tr|A0A0J5PSR3|A0A0J5PSR3_ASPFM|tr|A0A0J5PRN6|A0A0J5PRN6_ASPFM	http://amigo.geneontology.org/cgi-bin/amigo/term_details?term=GO:0006807
cellular metabolic process	Gene Ontology	GO:0044237	9	2202	0.778369	0.866494	tr|A0A0J5Q407|A0A0J5Q407_ASPFM|tr|A0A0J5PPW1|A0A0J5PPW1_ASPFM|tr|A0A0J5PW10|A0A0J5PW10_ASPFM|tr|A0A0J5SIW4|A0A0J5SIW4_ASPFM|tr|A0A0J5PSR3|A0A0J5PSR3_ASPFM|tr|A0A0J5PRN6|A0A0J5PRN6_ASPFM|tr|A0A0J5PYR8|A0A0J5PYR8_ASPFM|tr|A0A0J5SD58|A0A0J5SD58_ASPFM|tr|A0A0J5PLL4|A0A0J5PLL4_ASPFM	http://amigo.geneontology.org/cgi-bin/amigo/term_details?term=GO:0044237
membrane	Gene Ontology	GO:0016020	4	1066	0.778736	0.866494	tr|A0A0J5PSR3|A0A0J5PSR3_ASPFM|tr|A0A0J5PPW1|A0A0J5PPW1_ASPFM|tr|A0A0J5PI87|A0A0J5PI87_ASPFM|tr|A0A0J5PFD8|A0A0J5PFD8_ASPFM	http://amigo.geneontology.org/cgi-bin/amigo/term_details?term=GO:0016020
single-organism localization	Gene Ontology	GO:1902578	1	304	0.778834	0.866494	tr|A0A0J5SD58|A0A0J5SD58_ASPFM	http://amigo.geneontology.org/cgi-bin/amigo/term_details?term=GO:1902578
regulation of cellular metabolic process	Gene Ontology	GO:0031323	2	575	0.779409	0.866494	tr|A0A0J5PRN6|A0A0J5PRN6_ASPFM|tr|A0A0J5SIW4|A0A0J5SIW4_ASPFM	http://amigo.geneontology.org/cgi-bin/amigo/term_details?term=GO:0031323
regulation of cellular process	Gene Ontology	GO:0050794	3	836	0.786521	0.871505	tr|A0A0J5PRN6|A0A0J5PRN6_ASPFM|tr|A0A0J5SD58|A0A0J5SD58_ASPFM|tr|A0A0J5SIW4|A0A0J5SIW4_ASPFM	http://amigo.geneontology.org/cgi-bin/amigo/term_details?term=GO:0050794
single-organism biosynthetic process	Gene Ontology	GO:0044711	2	584	0.786836	0.871505	tr|A0A0J5SD58|A0A0J5SD58_ASPFM|tr|A0A0J5PLL4|A0A0J5PLL4_ASPFM	http://amigo.geneontology.org/cgi-bin/amigo/term_details?term=GO:0044711
cellular nitrogen compound metabolic process	Gene Ontology	GO:0034641	5	1326	0.793461	0.877215	tr|A0A0J5Q407|A0A0J5Q407_ASPFM|tr|A0A0J5PRN6|A0A0J5PRN6_ASPFM|tr|A0A0J5SIW4|A0A0J5SIW4_ASPFM|tr|A0A0J5PPW1|A0A0J5PPW1_ASPFM|tr|A0A0J5PSR3|A0A0J5PSR3_ASPFM	http://amigo.geneontology.org/cgi-bin/amigo/term_details?term=GO:0034641
regulation of metabolic process	Gene Ontology	GO:0019222	2	595	0.795623	0.87798	tr|A0A0J5PRN6|A0A0J5PRN6_ASPFM|tr|A0A0J5SIW4|A0A0J5SIW4_ASPFM	http://amigo.geneontology.org/cgi-bin/amigo/term_details?term=GO:0019222
cellular catabolic process	Gene Ontology	GO:0044248	1	342	0.817365	0.900308	tr|A0A0J5PW10|A0A0J5PW10_ASPFM	http://amigo.geneontology.org/cgi-bin/amigo/term_details?term=GO:0044248
single-organism metabolic process	Gene Ontology	GO:0044710	5	1396	0.830388	0.912968	tr|A0A0J5PW10|A0A0J5PW10_ASPFM|tr|A0A0J5PSR3|A0A0J5PSR3_ASPFM|tr|A0A0J5PLL4|A0A0J5PLL4_ASPFM|tr|A0A0J5PPW1|A0A0J5PPW1_ASPFM|tr|A0A0J5SD58|A0A0J5SD58_ASPFM	http://amigo.geneontology.org/cgi-bin/amigo/term_details?term=GO:0044710
cellular macromolecule metabolic process	Gene Ontology	GO:0044260	5	1425	0.844103	0.926341	tr|A0A0J5PW10|A0A0J5PW10_ASPFM|tr|A0A0J5Q407|A0A0J5Q407_ASPFM|tr|A0A0J5SIW4|A0A0J5SIW4_ASPFM|tr|A0A0J5PYR8|A0A0J5PYR8_ASPFM|tr|A0A0J5PRN6|A0A0J5PRN6_ASPFM	http://amigo.geneontology.org/cgi-bin/amigo/term_details?term=GO:0044260
ATP binding	Gene Ontology	GO:0005524	1	376	0.846216	0.926956	tr|A0A0J5PRN6|A0A0J5PRN6_ASPFM	http://amigo.geneontology.org/cgi-bin/amigo/term_details?term=GO:0005524
adenyl ribonucleotide binding	Gene Ontology	GO:0032559	1	382	0.850822	0.930236	tr|A0A0J5PRN6|A0A0J5PRN6_ASPFM	http://amigo.geneontology.org/cgi-bin/amigo/term_details?term=GO:0032559
adenyl nucleotide binding	Gene Ontology	GO:0030554	1	384	0.852327	0.930236	tr|A0A0J5PRN6|A0A0J5PRN6_ASPFM	http://amigo.geneontology.org/cgi-bin/amigo/term_details?term=GO:0030554
transferase activity	Gene Ontology	GO:0016740	2	699	0.864356	0.941643	tr|A0A0J5PRN6|A0A0J5PRN6_ASPFM|tr|A0A0J5PYR8|A0A0J5PYR8_ASPFM	http://amigo.geneontology.org/cgi-bin/amigo/term_details?term=GO:0016740
zinc ion binding	Gene Ontology	GO:0008270	1	427	0.881317	0.958372	tr|A0A0J5PPW1|A0A0J5PPW1_ASPFM	http://amigo.geneontology.org/cgi-bin/amigo/term_details?term=GO:0008270
cellular biosynthetic process	Gene Ontology	GO:0044249	4	1301	0.894536	0.958933	tr|A0A0J5PRN6|A0A0J5PRN6_ASPFM|tr|A0A0J5SD58|A0A0J5SD58_ASPFM|tr|A0A0J5SIW4|A0A0J5SIW4_ASPFM|tr|A0A0J5PLL4|A0A0J5PLL4_ASPFM	http://amigo.geneontology.org/cgi-bin/amigo/term_details?term=GO:0044249
purine ribonucleoside triphosphate binding	Gene Ontology	GO:0035639	1	453	0.89606	0.958933	tr|A0A0J5PRN6|A0A0J5PRN6_ASPFM	http://amigo.geneontology.org/cgi-bin/amigo/term_details?term=GO:0035639
organic substance biosynthetic process	Gene Ontology	GO:1901576	4	1314	0.899075	0.958933	tr|A0A0J5PRN6|A0A0J5PRN6_ASPFM|tr|A0A0J5SD58|A0A0J5SD58_ASPFM|tr|A0A0J5SIW4|A0A0J5SIW4_ASPFM|tr|A0A0J5PLL4|A0A0J5PLL4_ASPFM	http://amigo.geneontology.org/cgi-bin/amigo/term_details?term=GO:1901576
purine ribonucleoside binding	Gene Ontology	GO:0032550	1	460	0.899713	0.958933	tr|A0A0J5PRN6|A0A0J5PRN6_ASPFM	http://amigo.geneontology.org/cgi-bin/amigo/term_details?term=GO:0032550
ribonucleoside binding	Gene Ontology	GO:0032549	1	460	0.899713	0.958933	tr|A0A0J5PRN6|A0A0J5PRN6_ASPFM	http://amigo.geneontology.org/cgi-bin/amigo/term_details?term=GO:0032549
purine nucleoside binding	Gene Ontology	GO:0001883	1	460	0.899713	0.958933	tr|A0A0J5PRN6|A0A0J5PRN6_ASPFM	http://amigo.geneontology.org/cgi-bin/amigo/term_details?term=GO:0001883
purine ribonucleotide binding	Gene Ontology	GO:0032555	1	460	0.899713	0.958933	tr|A0A0J5PRN6|A0A0J5PRN6_ASPFM	http://amigo.geneontology.org/cgi-bin/amigo/term_details?term=GO:0032555
nucleobase-containing compound metabolic process	Gene Ontology	GO:0006139	3	1053	0.899941	0.958933	tr|A0A0J5Q407|A0A0J5Q407_ASPFM|tr|A0A0J5PSR3|A0A0J5PSR3_ASPFM|tr|A0A0J5PPW1|A0A0J5PPW1_ASPFM	http://amigo.geneontology.org/cgi-bin/amigo/term_details?term=GO:0006139
nucleoside binding	Gene Ontology	GO:0001882	1	461	0.900224	0.958933	tr|A0A0J5PRN6|A0A0J5PRN6_ASPFM	http://amigo.geneontology.org/cgi-bin/amigo/term_details?term=GO:0001882
purine nucleotide binding	Gene Ontology	GO:0017076	1	462	0.900733	0.958933	tr|A0A0J5PRN6|A0A0J5PRN6_ASPFM	http://amigo.geneontology.org/cgi-bin/amigo/term_details?term=GO:0017076
regulation of gene expression	Gene Ontology	GO:0010468	1	468	0.903733	0.958933	tr|A0A0J5PRN6|A0A0J5PRN6_ASPFM	http://amigo.geneontology.org/cgi-bin/amigo/term_details?term=GO:0010468
regulation of macromolecule biosynthetic process	Gene Ontology	GO:0010556	1	472	0.905684	0.958933	tr|A0A0J5PRN6|A0A0J5PRN6_ASPFM	http://amigo.geneontology.org/cgi-bin/amigo/term_details?term=GO:0010556
regulation of cellular macromolecule biosynthetic process	Gene Ontology	GO:2000112	1	472	0.905684	0.958933	tr|A0A0J5PRN6|A0A0J5PRN6_ASPFM	http://amigo.geneontology.org/cgi-bin/amigo/term_details?term=GO:2000112
heterocyclic compound binding	Gene Ontology	GO:1901363	4	1341	0.907976	0.958933	tr|A0A0J5PRN6|A0A0J5PRN6_ASPFM|tr|A0A0J5PJV8|A0A0J5PJV8_ASPFM|tr|A0A0J5PLL4|A0A0J5PLL4_ASPFM|tr|A0A0J5PRC2|A0A0J5PRC2_ASPFM	http://amigo.geneontology.org/cgi-bin/amigo/term_details?term=GO:1901363
organic cyclic compound binding	Gene Ontology	GO:0097159	4	1344	0.908922	0.958933	tr|A0A0J5PRN6|A0A0J5PRN6_ASPFM|tr|A0A0J5PJV8|A0A0J5PJV8_ASPFM|tr|A0A0J5PLL4|A0A0J5PLL4_ASPFM|tr|A0A0J5PRC2|A0A0J5PRC2_ASPFM	http://amigo.geneontology.org/cgi-bin/amigo/term_details?term=GO:0097159
ribonucleotide binding	Gene Ontology	GO:0032553	1	485	0.911761	0.958933	tr|A0A0J5PRN6|A0A0J5PRN6_ASPFM	http://amigo.geneontology.org/cgi-bin/amigo/term_details?term=GO:0032553
cellular component organization	Gene Ontology	GO:0016043	2	812	0.914988	0.958933	tr|A0A0J5SD58|A0A0J5SD58_ASPFM|tr|A0A0J5PFD8|A0A0J5PFD8_ASPFM	http://amigo.geneontology.org/cgi-bin/amigo/term_details?term=GO:0016043
cellular macromolecule biosynthetic process	Gene Ontology	GO:0034645	2	818	0.917119	0.958933	tr|A0A0J5PRN6|A0A0J5PRN6_ASPFM|tr|A0A0J5SIW4|A0A0J5SIW4_ASPFM	http://amigo.geneontology.org/cgi-bin/amigo/term_details?term=GO:0034645
carbohydrate derivative binding	Gene Ontology	GO:0097367	1	499	0.917876	0.958933	tr|A0A0J5PRN6|A0A0J5PRN6_ASPFM	http://amigo.geneontology.org/cgi-bin/amigo/term_details?term=GO:0097367
macromolecule biosynthetic process	Gene Ontology	GO:0009059	2	823	0.918857	0.958933	tr|A0A0J5PRN6|A0A0J5PRN6_ASPFM|tr|A0A0J5SIW4|A0A0J5SIW4_ASPFM	http://amigo.geneontology.org/cgi-bin/amigo/term_details?term=GO:0009059
regulation of cellular biosynthetic process	Gene Ontology	GO:0031326	1	502	0.919132	0.958933	tr|A0A0J5PRN6|A0A0J5PRN6_ASPFM	http://amigo.geneontology.org/cgi-bin/amigo/term_details?term=GO:0031326
biosynthetic process	Gene Ontology	GO:0009058	4	1382	0.920205	0.958933	tr|A0A0J5PRN6|A0A0J5PRN6_ASPFM|tr|A0A0J5SD58|A0A0J5SD58_ASPFM|tr|A0A0J5SIW4|A0A0J5SIW4_ASPFM|tr|A0A0J5PLL4|A0A0J5PLL4_ASPFM	http://amigo.geneontology.org/cgi-bin/amigo/term_details?term=GO:0009058
cellular process	Gene Ontology	GO:0009987	10	2833	0.92048	0.958933	tr|A0A0J5Q407|A0A0J5Q407_ASPFM|tr|A0A0J5PLL4|A0A0J5PLL4_ASPFM|tr|A0A0J5PPW1|A0A0J5PPW1_ASPFM|tr|A0A0J5PW10|A0A0J5PW10_ASPFM|tr|A0A0J5SIW4|A0A0J5SIW4_ASPFM|tr|A0A0J5PSR3|A0A0J5PSR3_ASPFM|tr|A0A0J5PRN6|A0A0J5PRN6_ASPFM|tr|A0A0J5PYR8|A0A0J5PYR8_ASPFM|tr|A0A0J5SD58|A0A0J5SD58_ASPFM|tr|A0A0J5PFD8|A0A0J5PFD8_ASPFM	http://amigo.geneontology.org/cgi-bin/amigo/term_details?term=GO:0009987
regulation of nitrogen compound metabolic process	Gene Ontology	GO:0051171	1	506	0.920777	0.958933	tr|A0A0J5PRN6|A0A0J5PRN6_ASPFM	http://amigo.geneontology.org/cgi-bin/amigo/term_details?term=GO:0051171
regulation of biosynthetic process	Gene Ontology	GO:0009889	1	509	0.921989	0.958933	tr|A0A0J5PRN6|A0A0J5PRN6_ASPFM	http://amigo.geneontology.org/cgi-bin/amigo/term_details?term=GO:0009889
transport	Gene Ontology	GO:0006810	2	858	0.93012	0.959942	tr|A0A0J5SD58|A0A0J5SD58_ASPFM|tr|A0A0J5PI87|A0A0J5PI87_ASPFM	http://amigo.geneontology.org/cgi-bin/amigo/term_details?term=GO:0006810
integral component of membrane	Gene Ontology	GO:0016021	1	533	0.931054	0.959942	tr|A0A0J5PSR3|A0A0J5PSR3_ASPFM	http://amigo.geneontology.org/cgi-bin/amigo/term_details?term=GO:0016021
membrane-enclosed lumen	Gene Ontology	GO:0031974	1	539	0.933153	0.959942	tr|A0A0J5PSR3|A0A0J5PSR3_ASPFM	http://amigo.geneontology.org/cgi-bin/amigo/term_details?term=GO:0031974
intracellular organelle lumen	Gene Ontology	GO:0070013	1	539	0.933153	0.959942	tr|A0A0J5PSR3|A0A0J5PSR3_ASPFM	http://amigo.geneontology.org/cgi-bin/amigo/term_details?term=GO:0070013
organelle lumen	Gene Ontology	GO:0043233	1	539	0.933153	0.959942	tr|A0A0J5PSR3|A0A0J5PSR3_ASPFM	http://amigo.geneontology.org/cgi-bin/amigo/term_details?term=GO:0043233
intrinsic component of membrane	Gene Ontology	GO:0031224	1	545	0.935191	0.959942	tr|A0A0J5PSR3|A0A0J5PSR3_ASPFM	http://amigo.geneontology.org/cgi-bin/amigo/term_details?term=GO:0031224
establishment of localization	Gene Ontology	GO:0051234	2	877	0.935614	0.959942	tr|A0A0J5SD58|A0A0J5SD58_ASPFM|tr|A0A0J5PI87|A0A0J5PI87_ASPFM	http://amigo.geneontology.org/cgi-bin/amigo/term_details?term=GO:0051234
gene expression	Gene Ontology	GO:0010467	2	886	0.938074	0.959942	tr|A0A0J5PRN6|A0A0J5PRN6_ASPFM|tr|A0A0J5SIW4|A0A0J5SIW4_ASPFM	http://amigo.geneontology.org/cgi-bin/amigo/term_details?term=GO:0010467
cellular aromatic compound metabolic process	Gene Ontology	GO:0006725	3	1181	0.938517	0.959942	tr|A0A0J5Q407|A0A0J5Q407_ASPFM|tr|A0A0J5PSR3|A0A0J5PSR3_ASPFM|tr|A0A0J5PPW1|A0A0J5PPW1_ASPFM	http://amigo.geneontology.org/cgi-bin/amigo/term_details?term=GO:0006725
cellular nitrogen compound biosynthetic process	Gene Ontology	GO:0044271	2	895	0.940448	0.959942	tr|A0A0J5PRN6|A0A0J5PRN6_ASPFM|tr|A0A0J5SIW4|A0A0J5SIW4_ASPFM	http://amigo.geneontology.org/cgi-bin/amigo/term_details?term=GO:0044271
heterocycle metabolic process	Gene Ontology	GO:0046483	3	1190	0.940647	0.959942	tr|A0A0J5Q407|A0A0J5Q407_ASPFM|tr|A0A0J5PSR3|A0A0J5PSR3_ASPFM|tr|A0A0J5PPW1|A0A0J5PPW1_ASPFM	http://amigo.geneontology.org/cgi-bin/amigo/term_details?term=GO:0046483
cellular component organization or biogenesis	Gene Ontology	GO:0071840	2	916	0.945662	0.9626	tr|A0A0J5SD58|A0A0J5SD58_ASPFM|tr|A0A0J5PFD8|A0A0J5PFD8_ASPFM	http://amigo.geneontology.org/cgi-bin/amigo/term_details?term=GO:0071840
transition metal ion binding	Gene Ontology	GO:0046914	1	582	0.946476	0.9626	tr|A0A0J5PPW1|A0A0J5PPW1_ASPFM	http://amigo.geneontology.org/cgi-bin/amigo/term_details?term=GO:0046914
single-organism process	Gene Ontology	GO:0044699	7	2274	0.949152	0.96313	tr|A0A0J5PLL4|A0A0J5PLL4_ASPFM|tr|A0A0J5PFD8|A0A0J5PFD8_ASPFM|tr|A0A0J5PW10|A0A0J5PW10_ASPFM|tr|A0A0J5PSR3|A0A0J5PSR3_ASPFM|tr|A0A0J5PRN6|A0A0J5PRN6_ASPFM|tr|A0A0J5SD58|A0A0J5SD58_ASPFM|tr|A0A0J5PPW1|A0A0J5PPW1_ASPFM	http://amigo.geneontology.org/cgi-bin/amigo/term_details?term=GO:0044699
organelle organization	Gene Ontology	GO:0006996	1	596	0.950224	0.96313	tr|A0A0J5SD58|A0A0J5SD58_ASPFM	http://amigo.geneontology.org/cgi-bin/amigo/term_details?term=GO:0006996
localization	Gene Ontology	GO:0051179	2	959	0.955044	0.966375	tr|A0A0J5SD58|A0A0J5SD58_ASPFM|tr|A0A0J5PI87|A0A0J5PI87_ASPFM	http://amigo.geneontology.org/cgi-bin/amigo/term_details?term=GO:0051179
organic cyclic compound metabolic process	Gene Ontology	GO:1901360	3	1269	0.956677	0.966389	tr|A0A0J5Q407|A0A0J5Q407_ASPFM|tr|A0A0J5PSR3|A0A0J5PSR3_ASPFM|tr|A0A0J5PPW1|A0A0J5PPW1_ASPFM	http://amigo.geneontology.org/cgi-bin/amigo/term_details?term=GO:1901360
nucleus	Gene Ontology	GO:0005634	4	1591	0.963038	0.971172	tr|A0A0J5Q407|A0A0J5Q407_ASPFM|tr|A0A0J5SD58|A0A0J5SD58_ASPFM|tr|A0A0J5PM30|A0A0J5PM30_ASPFM|tr|A0A0J5PYR8|A0A0J5PYR8_ASPFM	http://amigo.geneontology.org/cgi-bin/amigo/term_details?term=GO:0005634
nucleotide binding	Gene Ontology	GO:0000166	1	722	0.974233	0.979154	tr|A0A0J5PRN6|A0A0J5PRN6_ASPFM	http://amigo.geneontology.org/cgi-bin/amigo/term_details?term=GO:0000166
nucleoside phosphate binding	Gene Ontology	GO:1901265	1	722	0.974233	0.979154	tr|A0A0J5PRN6|A0A0J5PRN6_ASPFM	http://amigo.geneontology.org/cgi-bin/amigo/term_details?term=GO:1901265
RNA metabolic process	Gene Ontology	GO:0016070	1	768	0.979786	0.981749	tr|A0A0J5Q407|A0A0J5Q407_ASPFM	http://amigo.geneontology.org/cgi-bin/amigo/term_details?term=GO:0016070
small molecule binding	Gene Ontology	GO:0036094	1	771	0.980104	0.981749	tr|A0A0J5PRN6|A0A0J5PRN6_ASPFM	http://amigo.geneontology.org/cgi-bin/amigo/term_details?term=GO:0036094
nucleic acid metabolic process	Gene Ontology	GO:0090304	1	887	0.989274	0.989274	tr|A0A0J5Q407|A0A0J5Q407_ASPFM	http://amigo.geneontology.org/cgi-bin/amigo/term_details?term=GO:0090304

## Sheet: cys_up_kegg
#Term	Database	ID	Input number	Background number	P-Value	Corrected P-Value	Input	Hyperlink
Oxidative phosphorylation	KEGG PATHWAY	afm00190	4	73	0.000509961	0.101482	tr|A0A0J5PSR3|A0A0J5PSR3_ASPFM|tr|A0A0J5PPW1|A0A0J5PPW1_ASPFM|tr|A0A0J5PZ17|A0A0J5PZ17_ASPFM|tr|A0A0J5SDI5|A0A0J5SDI5_ASPFM	http://www.genome.jp/kegg-bin/show_pathway?afm00190/afm:AFUA_1G12290%09red/afm:AFUA_4G11390%09red/afm:AFUA_5G10610%09red/afm:AFUA_2G03010%09red
Pentose and glucuronate interconversions	KEGG PATHWAY	afm00040	2	36	0.0145241	0.260867	tr|A0A0J5PJ79|A0A0J5PJ79_ASPFM|tr|A0A0J5PLR9|A0A0J5PLR9_ASPFM	http://www.genome.jp/kegg-bin/show_pathway?afm00040/afm:AFUA_6G02980%09red/afm:AFUA_7G06400%09red
Metabolic pathways	KEGG PATHWAY	afm01100	9	937	0.0359461	0.260867	tr|A0A0J5PSK8|A0A0J5PSK8_ASPFM|tr|A0A0J5PPW1|A0A0J5PPW1_ASPFM|tr|A0A0J5SDI5|A0A0J5SDI5_ASPFM|tr|A0A0J5PW10|A0A0J5PW10_ASPFM|tr|A0A0J5PHH0|A0A0J5PHH0_ASPFM|tr|A0A0J5PZ17|A0A0J5PZ17_ASPFM|tr|A0A0J5PTV0|A0A0J5PTV0_ASPFM|tr|A0A0J5PSR3|A0A0J5PSR3_ASPFM|tr|A0A0J5PJ79|A0A0J5PJ79_ASPFM	http://www.genome.jp/kegg-bin/show_pathway?afm01100/afm:AFUA_1G12290%09red/afm:AFUA_6G04610%09red/afm:AFUA_3G13240%09red/afm:AFUA_4G11390%09red/afm:AFUA_5G10610%09red/afm:AFUA_1G12070%09red/afm:AFUA_2G03010%09red/afm:AFUA_3G03870%09red/afm:AFUA_6G02980%09red
Starch and sucrose metabolism	KEGG PATHWAY	afm00500	2	88	0.0706313	0.282341	tr|A0A0J5PSK8|A0A0J5PSK8_ASPFM|tr|A0A0J5PJ79|A0A0J5PJ79_ASPFM	http://www.genome.jp/kegg-bin/show_pathway?afm00500/afm:AFUA_3G03870%09red/afm:AFUA_6G02980%09red
Biosynthesis of unsaturated fatty acids	KEGG PATHWAY	afm01040	1	15	0.0749985	0.282341	tr|A0A0J5PLL4|A0A0J5PLL4_ASPFM	http://www.genome.jp/kegg-bin/show_pathway?afm01040/afm:AFUA_7G05920%09red
Phosphatidylinositol signaling system	KEGG PATHWAY	afm04070	1	16	0.0794986	0.282341	tr|A0A0J5SD58|A0A0J5SD58_ASPFM	http://www.genome.jp/kegg-bin/show_pathway?afm04070/afm:AFUA_4G10050%09red
Homologous recombination	KEGG PATHWAY	afm03440	1	18	0.0884345	0.286932	tr|A0A0J5T034|A0A0J5T034_ASPFM	http://www.genome.jp/kegg-bin/show_pathway?afm03440/afm:AFUA_6G11130%09red
Mismatch repair	KEGG PATHWAY	afm03430	1	23	0.110405	0.305146	tr|A0A0J5T034|A0A0J5T034_ASPFM	http://www.genome.jp/kegg-bin/show_pathway?afm03430/afm:AFUA_6G11130%09red
RNA polymerase	KEGG PATHWAY	afm03020	1	27	0.127607	0.324175	tr|A0A0J5PHH0|A0A0J5PHH0_ASPFM	http://www.genome.jp/kegg-bin/show_pathway?afm03020/afm:AFUA_6G04610%09red
Fatty acid metabolism	KEGG PATHWAY	afm01212	1	30	0.140294	0.328453	tr|A0A0J5PLL4|A0A0J5PLL4_ASPFM	http://www.genome.jp/kegg-bin/show_pathway?afm01212/afm:AFUA_7G05920%09red
DNA replication	KEGG PATHWAY	afm03030	1	33	0.152801	0.335376	tr|A0A0J5T034|A0A0J5T034_ASPFM	http://www.genome.jp/kegg-bin/show_pathway?afm03030/afm:AFUA_6G11130%09red
Glyoxylate and dicarboxylate metabolism	KEGG PATHWAY	afm00630	1	35	0.16104	0.342787	tr|A0A0J5PW10|A0A0J5PW10_ASPFM	http://www.genome.jp/kegg-bin/show_pathway?afm00630/afm:AFUA_1G12070%09red
Galactose metabolism	KEGG PATHWAY	afm00052	1	39	0.177283	0.356357	tr|A0A0J5PTV0|A0A0J5PTV0_ASPFM	http://www.genome.jp/kegg-bin/show_pathway?afm00052/afm:AFUA_3G13240%09red
Nucleotide excision repair	KEGG PATHWAY	afm03420	1	39	0.177283	0.356357	tr|A0A0J5T034|A0A0J5T034_ASPFM	http://www.genome.jp/kegg-bin/show_pathway?afm03420/afm:AFUA_6G11130%09red
Glycolysis / Gluconeogenesis	KEGG PATHWAY	afm00010	1	50	0.220381	0.3999	tr|A0A0J5PTV0|A0A0J5PTV0_ASPFM	http://www.genome.jp/kegg-bin/show_pathway?afm00010/afm:AFUA_3G13240%09red
Glycine, serine and threonine metabolism	KEGG PATHWAY	afm00260	1	59	0.253992	0.436983	tr|A0A0J5PW10|A0A0J5PW10_ASPFM	http://www.genome.jp/kegg-bin/show_pathway?afm00260/afm:AFUA_1G12070%09red
MAPK signaling pathway - yeast	KEGG PATHWAY	afm04011	1	61	0.261266	0.44061	tr|A0A0J5PS38|A0A0J5PS38_ASPFM	http://www.genome.jp/kegg-bin/show_pathway?afm04011/afm:AFUA_5G08420%09red
Pyrimidine metabolism	KEGG PATHWAY	afm00240	1	65	0.275607	0.450788	tr|A0A0J5PHH0|A0A0J5PHH0_ASPFM	http://www.genome.jp/kegg-bin/show_pathway?afm00240/afm:AFUA_6G04610%09red
Protein processing in endoplasmic reticulum	KEGG PATHWAY	afm04141	1	72	0.300051	0.471396	tr|A0A0J5PRN6|A0A0J5PRN6_ASPFM	http://www.genome.jp/kegg-bin/show_pathway?afm04141/afm:AFUA_5G06750%09red
Purine metabolism	KEGG PATHWAY	afm00230	1	89	0.356103	0.524922	tr|A0A0J5PHH0|A0A0J5PHH0_ASPFM	http://www.genome.jp/kegg-bin/show_pathway?afm00230/afm:AFUA_6G04610%09red
Ribosome	KEGG PATHWAY	afm03010	1	95	0.374817	0.535325	tr|A0A0J5SIW4|A0A0J5SIW4_ASPFM	http://www.genome.jp/kegg-bin/show_pathway?afm03010/afm:AFUA_1G06830%09red
Biosynthesis of antibiotics	KEGG PATHWAY	afm01130	2	274	0.389447	0.538102	tr|A0A0J5PW10|A0A0J5PW10_ASPFM|tr|A0A0J5PTV0|A0A0J5PTV0_ASPFM	http://www.genome.jp/kegg-bin/show_pathway?afm01130/afm:AFUA_3G13240%09red/afm:AFUA_1G12070%09red
Biosynthesis of secondary metabolites	KEGG PATHWAY	afm01110	2	364	0.535529	0.651142	tr|A0A0J5PW10|A0A0J5PW10_ASPFM|tr|A0A0J5PTV0|A0A0J5PTV0_ASPFM	http://www.genome.jp/kegg-bin/show_pathway?afm01110/afm:AFUA_3G13240%09red/afm:AFUA_1G12070%09red

## Sheet: cys_down_go
#Term	Database	ID	Input number	Background number	P-Value	Corrected P-Value	Input	Hyperlink
cytoplasm	Gene Ontology	GO:0005737	43	2298	7.7286e-07	0.000530107	tr|A0A0J5PKY1|A0A0J5PKY1_ASPFM|tr|A0A0J5PF02|A0A0J5PF02_ASPFM|tr|A0A0J5SQA8|A0A0J5SQA8_ASPFM|tr|A0A0J5Q2W2|A0A0J5Q2W2_ASPFM|tr|A0A0J5PZF9|A0A0J5PZF9_ASPFM|tr|A0A0J5PQL3|A0A0J5PQL3_ASPFM|tr|A0A0J5Q4T5|A0A0J5Q4T5_ASPFM|tr|A0A0J5Q3U7|A0A0J5Q3U7_ASPFM|tr|A0A0J5STT4|A0A0J5STT4_ASPFM|tr|A0A0J5PRM9|A0A0J5PRM9_ASPFM|tr|A0A0J5PWF4|A0A0J5PWF4_ASPFM|tr|A0A0J5PHI4|A0A0J5PHI4_ASPFM|tr|A0A0J5PUK7|A0A0J5PUK7_AS…	http://amigo.geneontology.org/cgi-bin/amigo/term_details?term=GO:0005737
cytosol	Gene Ontology	GO:0005829	28	1121	8.25712e-07	0.000530107	tr|A0A0J5Q2W2|A0A0J5Q2W2_ASPFM|tr|A0A0J5PZF9|A0A0J5PZF9_ASPFM|tr|A0A0J5SQG5|A0A0J5SQG5_ASPFM|tr|A0A0J5STT4|A0A0J5STT4_ASPFM|tr|A0A0J5PRM9|A0A0J5PRM9_ASPFM|tr|A0A0J5PWF4|A0A0J5PWF4_ASPFM|tr|A0A0J5PKY1|A0A0J5PKY1_ASPFM|tr|A0A0J5PUK7|A0A0J5PUK7_ASPFM|tr|A0A0J5PKZ7|A0A0J5PKZ7_ASPFM|tr|A0A0J5PNA9|A0A0J5PNA9_ASPFM|tr|A0A0J5Q4L0|A0A0J5Q4L0_ASPFM|tr|A0A0J5PRC9|A0A0J5PRC9_ASPFM|tr|A0A0J5PVS4|A0A0J5PVS4_AS…	http://amigo.geneontology.org/cgi-bin/amigo/term_details?term=GO:0005829
cytoplasmic part	Gene Ontology	GO:0044444	38	2099	1.2487e-05	0.00534445	tr|A0A0J5PKY1|A0A0J5PKY1_ASPFM|tr|A0A0J5PF02|A0A0J5PF02_ASPFM|tr|A0A0J5Q2W2|A0A0J5Q2W2_ASPFM|tr|A0A0J5PZF9|A0A0J5PZF9_ASPFM|tr|A0A0J5PQL3|A0A0J5PQL3_ASPFM|tr|A0A0J5Q4T5|A0A0J5Q4T5_ASPFM|tr|A0A0J5Q3U7|A0A0J5Q3U7_ASPFM|tr|A0A0J5STT4|A0A0J5STT4_ASPFM|tr|A0A0J5PRM9|A0A0J5PRM9_ASPFM|tr|A0A0J5PWF4|A0A0J5PWF4_ASPFM|tr|A0A0J5PHI4|A0A0J5PHI4_ASPFM|tr|A0A0J5PUK7|A0A0J5PUK7_ASPFM|tr|A0A0J5PKZ7|A0A0J5PKZ7_AS…	http://amigo.geneontology.org/cgi-bin/amigo/term_details?term=GO:0044444
intracellular	Gene Ontology	GO:0005622	46	2998	6.81347e-05	0.01737	tr|A0A0J5PKY1|A0A0J5PKY1_ASPFM|tr|A0A0J5PF02|A0A0J5PF02_ASPFM|tr|A0A0J5SQA8|A0A0J5SQA8_ASPFM|tr|A0A0J5Q2W2|A0A0J5Q2W2_ASPFM|tr|A0A0J5PZF9|A0A0J5PZF9_ASPFM|tr|A0A0J5PQL3|A0A0J5PQL3_ASPFM|tr|A0A0J5Q4T5|A0A0J5Q4T5_ASPFM|tr|A0A0J5Q3U7|A0A0J5Q3U7_ASPFM|tr|A0A0J5STT4|A0A0J5STT4_ASPFM|tr|A0A0J5PRM9|A0A0J5PRM9_ASPFM|tr|A0A0J5PWF4|A0A0J5PWF4_ASPFM|tr|A0A0J5PHI4|A0A0J5PHI4_ASPFM|tr|A0A0J5PUK7|A0A0J5PUK7_AS…	http://amigo.geneontology.org/cgi-bin/amigo/term_details?term=GO:0005622
macromolecular complex	Gene Ontology	GO:0032991	22	1001	0.000118643	0.01737	tr|A0A0J5PV51|A0A0J5PV51_ASPFM|tr|A0A0J5PZF9|A0A0J5PZF9_ASPFM|tr|A0A0J5PQL3|A0A0J5PQL3_ASPFM|tr|A0A0J5PKZ7|A0A0J5PKZ7_ASPFM|tr|A0A0J5Q2W2|A0A0J5Q2W2_ASPFM|tr|A0A0J5Q4L0|A0A0J5Q4L0_ASPFM|tr|A0A0J5Q5A4|A0A0J5Q5A4_ASPFM|tr|A0A0J5PDH8|A0A0J5PDH8_ASPFM|tr|A0A0J5PKY1|A0A0J5PKY1_ASPFM|tr|A0A0J5PUB3|A0A0J5PUB3_ASPFM|tr|A0A0J5PNE9|A0A0J5PNE9_ASPFM|tr|A0A0J5PI11|A0A0J5PI11_ASPFM|tr|A0A0J5PRS9|A0A0J5PRS9_AS…	http://amigo.geneontology.org/cgi-bin/amigo/term_details?term=GO:0032991
filamentous growth of a population of unicellular organisms in response to heat	Gene Ontology	GO:0036168	3	8	0.000120048	0.01737	tr|A0A0J5PMP0|A0A0J5PMP0_ASPFM|tr|A0A0J5SQG5|A0A0J5SQG5_ASPFM|tr|A0A0J5PHI4|A0A0J5PHI4_ASPFM	http://amigo.geneontology.org/cgi-bin/amigo/term_details?term=GO:0036168
organelle envelope	Gene Ontology	GO:0031967	10	246	0.000120867	0.01737	tr|A0A0J5Q5A4|A0A0J5Q5A4_ASPFM|tr|A0A0J5PV51|A0A0J5PV51_ASPFM|tr|A0A0J5PKZ7|A0A0J5PKZ7_ASPFM|tr|A0A0J5PH08|A0A0J5PH08_ASPFM|tr|A0A0J5Q0U9|A0A0J5Q0U9_ASPFM|tr|A0A0J5PQL3|A0A0J5PQL3_ASPFM|tr|A0A0J5PVE5|A0A0J5PVE5_ASPFM|tr|A0A0J5Q1L6|A0A0J5Q1L6_ASPFM|tr|A0A0J5Q3U7|A0A0J5Q3U7_ASPFM|tr|A0A0J5Q1B9|A0A0J5Q1B9_ASPFM	http://amigo.geneontology.org/cgi-bin/amigo/term_details?term=GO:0031967
envelope	Gene Ontology	GO:0031975	10	247	0.000124814	0.01737	tr|A0A0J5Q5A4|A0A0J5Q5A4_ASPFM|tr|A0A0J5PV51|A0A0J5PV51_ASPFM|tr|A0A0J5PKZ7|A0A0J5PKZ7_ASPFM|tr|A0A0J5PH08|A0A0J5PH08_ASPFM|tr|A0A0J5Q0U9|A0A0J5Q0U9_ASPFM|tr|A0A0J5PQL3|A0A0J5PQL3_ASPFM|tr|A0A0J5PVE5|A0A0J5PVE5_ASPFM|tr|A0A0J5Q1L6|A0A0J5Q1L6_ASPFM|tr|A0A0J5Q3U7|A0A0J5Q3U7_ASPFM|tr|A0A0J5Q1B9|A0A0J5Q1B9_ASPFM	http://amigo.geneontology.org/cgi-bin/amigo/term_details?term=GO:0031975
intracellular part	Gene Ontology	GO:0044424	44	2901	0.000156069	0.01737	tr|A0A0J5PKY1|A0A0J5PKY1_ASPFM|tr|A0A0J5PF02|A0A0J5PF02_ASPFM|tr|A0A0J5SQA8|A0A0J5SQA8_ASPFM|tr|A0A0J5Q2W2|A0A0J5Q2W2_ASPFM|tr|A0A0J5PZF9|A0A0J5PZF9_ASPFM|tr|A0A0J5PQL3|A0A0J5PQL3_ASPFM|tr|A0A0J5Q4T5|A0A0J5Q4T5_ASPFM|tr|A0A0J5Q3U7|A0A0J5Q3U7_ASPFM|tr|A0A0J5STT4|A0A0J5STT4_ASPFM|tr|A0A0J5PRM9|A0A0J5PRM9_ASPFM|tr|A0A0J5PWF4|A0A0J5PWF4_ASPFM|tr|A0A0J5PHI4|A0A0J5PHI4_ASPFM|tr|A0A0J5PUK7|A0A0J5PUK7_AS…	http://amigo.geneontology.org/cgi-bin/amigo/term_details?term=GO:0044424
plasma membrane	Gene Ontology	GO:0005886	10	256	0.000165521	0.01737	tr|A0A0J5PN06|A0A0J5PN06_ASPFM|tr|A0A0J5PHI4|A0A0J5PHI4_ASPFM|tr|A0A0J5PV51|A0A0J5PV51_ASPFM|tr|A0A0J5SQG5|A0A0J5SQG5_ASPFM|tr|A0A0J5PZF9|A0A0J5PZF9_ASPFM|tr|A0A0J5PQL3|A0A0J5PQL3_ASPFM|tr|A0A0J5Q4T5|A0A0J5Q4T5_ASPFM|tr|A0A0J5PRS9|A0A0J5PRS9_ASPFM|tr|A0A0J5PMP0|A0A0J5PMP0_ASPFM|tr|A0A0J5Q0U9|A0A0J5Q0U9_ASPFM	http://amigo.geneontology.org/cgi-bin/amigo/term_details?term=GO:0005886
cell	Gene Ontology	GO:0005623	46	3108	0.000175864	0.01737	tr|A0A0J5PKY1|A0A0J5PKY1_ASPFM|tr|A0A0J5PF02|A0A0J5PF02_ASPFM|tr|A0A0J5SQA8|A0A0J5SQA8_ASPFM|tr|A0A0J5Q2W2|A0A0J5Q2W2_ASPFM|tr|A0A0J5PZF9|A0A0J5PZF9_ASPFM|tr|A0A0J5PQL3|A0A0J5PQL3_ASPFM|tr|A0A0J5Q4T5|A0A0J5Q4T5_ASPFM|tr|A0A0J5Q3U7|A0A0J5Q3U7_ASPFM|tr|A0A0J5STT4|A0A0J5STT4_ASPFM|tr|A0A0J5PRM9|A0A0J5PRM9_ASPFM|tr|A0A0J5PWF4|A0A0J5PWF4_ASPFM|tr|A0A0J5PHI4|A0A0J5PHI4_ASPFM|tr|A0A0J5PUK7|A0A0J5PUK7_AS…	http://amigo.geneontology.org/cgi-bin/amigo/term_details?term=GO:0005623
cell part	Gene Ontology	GO:0044464	46	3108	0.000175864	0.01737	tr|A0A0J5PKY1|A0A0J5PKY1_ASPFM|tr|A0A0J5PF02|A0A0J5PF02_ASPFM|tr|A0A0J5SQA8|A0A0J5SQA8_ASPFM|tr|A0A0J5Q2W2|A0A0J5Q2W2_ASPFM|tr|A0A0J5PZF9|A0A0J5PZF9_ASPFM|tr|A0A0J5PQL3|A0A0J5PQL3_ASPFM|tr|A0A0J5Q4T5|A0A0J5Q4T5_ASPFM|tr|A0A0J5Q3U7|A0A0J5Q3U7_ASPFM|tr|A0A0J5STT4|A0A0J5STT4_ASPFM|tr|A0A0J5PRM9|A0A0J5PRM9_ASPFM|tr|A0A0J5PWF4|A0A0J5PWF4_ASPFM|tr|A0A0J5PHI4|A0A0J5PHI4_ASPFM|tr|A0A0J5PUK7|A0A0J5PUK7_AS…	http://amigo.geneontology.org/cgi-bin/amigo/term_details?term=GO:0044464
cell periphery	Gene Ontology	GO:0071944	12	380	0.000248492	0.0224936	tr|A0A0J5PN06|A0A0J5PN06_ASPFM|tr|A0A0J5PWF4|A0A0J5PWF4_ASPFM|tr|A0A0J5PHI4|A0A0J5PHI4_ASPFM|tr|A0A0J5PV51|A0A0J5PV51_ASPFM|tr|A0A0J5SQG5|A0A0J5SQG5_ASPFM|tr|A0A0J5Q0U9|A0A0J5Q0U9_ASPFM|tr|A0A0J5PQL3|A0A0J5PQL3_ASPFM|tr|A0A0J5Q4T5|A0A0J5Q4T5_ASPFM|tr|A0A0J5Q4L0|A0A0J5Q4L0_ASPFM|tr|A0A0J5PRS9|A0A0J5PRS9_ASPFM|tr|A0A0J5PMP0|A0A0J5PMP0_ASPFM|tr|A0A0J5PZF9|A0A0J5PZF9_ASPFM	http://amigo.geneontology.org/cgi-bin/amigo/term_details?term=GO:0071944
regulation of cell cycle process	Gene Ontology	GO:0010564	7	131	0.00027972	0.0224936	tr|A0A0J5Q6M9|A0A0J5Q6M9_ASPFM|tr|A0A0J5PUK7|A0A0J5PUK7_ASPFM|tr|A0A0J5PVE5|A0A0J5PVE5_ASPFM|tr|A0A0J5SQG5|A0A0J5SQG5_ASPFM|tr|A0A0J5Q1I3|A0A0J5Q1I3_ASPFM|tr|A0A0J5PV51|A0A0J5PV51_ASPFM|tr|A0A0J5PMP0|A0A0J5PMP0_ASPFM	http://amigo.geneontology.org/cgi-bin/amigo/term_details?term=GO:0010564
intracellular organelle	Gene Ontology	GO:0043229	40	2606	0.000316169	0.0224936	tr|A0A0J5PKY1|A0A0J5PKY1_ASPFM|tr|A0A0J5PF02|A0A0J5PF02_ASPFM|tr|A0A0J5Q2W2|A0A0J5Q2W2_ASPFM|tr|A0A0J5PZF9|A0A0J5PZF9_ASPFM|tr|A0A0J5PQL3|A0A0J5PQL3_ASPFM|tr|A0A0J5Q4T5|A0A0J5Q4T5_ASPFM|tr|A0A0J5Q3U7|A0A0J5Q3U7_ASPFM|tr|A0A0J5STT4|A0A0J5STT4_ASPFM|tr|A0A0J5PRM9|A0A0J5PRM9_ASPFM|tr|A0A0J5PWF4|A0A0J5PWF4_ASPFM|tr|A0A0J5PHI4|A0A0J5PHI4_ASPFM|tr|A0A0J5PUK7|A0A0J5PUK7_ASPFM|tr|A0A0J5PKZ7|A0A0J5PKZ7_AS…	http://amigo.geneontology.org/cgi-bin/amigo/term_details?term=GO:0043229
organelle	Gene Ontology	GO:0043226	40	2606	0.000316169	0.0224936	tr|A0A0J5PKY1|A0A0J5PKY1_ASPFM|tr|A0A0J5PF02|A0A0J5PF02_ASPFM|tr|A0A0J5Q2W2|A0A0J5Q2W2_ASPFM|tr|A0A0J5PZF9|A0A0J5PZF9_ASPFM|tr|A0A0J5PQL3|A0A0J5PQL3_ASPFM|tr|A0A0J5Q4T5|A0A0J5Q4T5_ASPFM|tr|A0A0J5Q3U7|A0A0J5Q3U7_ASPFM|tr|A0A0J5STT4|A0A0J5STT4_ASPFM|tr|A0A0J5PRM9|A0A0J5PRM9_ASPFM|tr|A0A0J5PWF4|A0A0J5PWF4_ASPFM|tr|A0A0J5PHI4|A0A0J5PHI4_ASPFM|tr|A0A0J5PUK7|A0A0J5PUK7_ASPFM|tr|A0A0J5PKZ7|A0A0J5PKZ7_AS…	http://amigo.geneontology.org/cgi-bin/amigo/term_details?term=GO:0043226
organic substance transport	Gene Ontology	GO:0071702	11	333	0.000316459	0.0224936	tr|A0A0J5PN06|A0A0J5PN06_ASPFM|tr|A0A0J5Q2G5|A0A0J5Q2G5_ASPFM|tr|A0A0J5PHI4|A0A0J5PHI4_ASPFM|tr|A0A0J5PV51|A0A0J5PV51_ASPFM|tr|A0A0J5Q1I3|A0A0J5Q1I3_ASPFM|tr|A0A0J5PZF9|A0A0J5PZF9_ASPFM|tr|A0A0J5SQG5|A0A0J5SQG5_ASPFM|tr|A0A0J5Q4T5|A0A0J5Q4T5_ASPFM|tr|A0A0J5PVS4|A0A0J5PVS4_ASPFM|tr|A0A0J5PRS9|A0A0J5PRS9_ASPFM|tr|A0A0J5PH08|A0A0J5PH08_ASPFM	http://amigo.geneontology.org/cgi-bin/amigo/term_details?term=GO:0071702
cytosolic part	Gene Ontology	GO:0044445	6	95	0.000333621	0.0224936	tr|A0A0J5PKY1|A0A0J5PKY1_ASPFM|tr|A0A0J5Q2W2|A0A0J5Q2W2_ASPFM|tr|A0A0J5Q0I9|A0A0J5Q0I9_ASPFM|tr|A0A0J5PVE5|A0A0J5PVE5_ASPFM|tr|A0A0J5PNA9|A0A0J5PNA9_ASPFM|tr|A0A0J5Q4L0|A0A0J5Q4L0_ASPFM	http://amigo.geneontology.org/cgi-bin/amigo/term_details?term=GO:0044445
cellular localization	Gene Ontology	GO:0051641	12	395	0.000350367	0.0224936	tr|A0A0J5PHI4|A0A0J5PHI4_ASPFM|tr|A0A0J5PKZ7|A0A0J5PKZ7_ASPFM|tr|A0A0J5Q1I3|A0A0J5Q1I3_ASPFM|tr|A0A0J5Q0U9|A0A0J5Q0U9_ASPFM|tr|A0A0J5SQG5|A0A0J5SQG5_ASPFM|tr|A0A0J5PUB3|A0A0J5PUB3_ASPFM|tr|A0A0J5PV51|A0A0J5PV51_ASPFM|tr|A0A0J5PVS4|A0A0J5PVS4_ASPFM|tr|A0A0J5PRS9|A0A0J5PRS9_ASPFM|tr|A0A0J5PMP0|A0A0J5PMP0_ASPFM|tr|A0A0J5PH08|A0A0J5PH08_ASPFM|tr|A0A0J5PZF9|A0A0J5PZF9_ASPFM	http://amigo.geneontology.org/cgi-bin/amigo/term_details?term=GO:0051641
calcium ion binding	Gene Ontology	GO:0005509	4	41	0.000766355	0.0400236	tr|A0A0J5Q166|A0A0J5Q166_ASPFM|tr|A0A0J5PMM3|A0A0J5PMM3_ASPFM|tr|A0A0J5PVS4|A0A0J5PVS4_ASPFM|tr|A0A0J5PIQ5|A0A0J5PIQ5_ASPFM	http://amigo.geneontology.org/cgi-bin/amigo/term_details?term=GO:0005509
cellular protein metabolic process	Gene Ontology	GO:0044267	15	633	0.000821682	0.0400236	tr|A0A0J5PDH8|A0A0J5PDH8_ASPFM|tr|A0A0J5Q4L0|A0A0J5Q4L0_ASPFM|tr|A0A0J5PKY1|A0A0J5PKY1_ASPFM|tr|A0A0J5Q2W2|A0A0J5Q2W2_ASPFM|tr|A0A0J5Q0I9|A0A0J5Q0I9_ASPFM|tr|A0A0J5PVE5|A0A0J5PVE5_ASPFM|tr|A0A0J5SQG5|A0A0J5SQG5_ASPFM|tr|A0A0J5PUB3|A0A0J5PUB3_ASPFM|tr|A0A0J5PNA9|A0A0J5PNA9_ASPFM|tr|A0A0J5PI11|A0A0J5PI11_ASPFM|tr|A0A0J5SQA8|A0A0J5SQA8_ASPFM|tr|A0A0J5Q1L6|A0A0J5Q1L6_ASPFM|tr|A0A0J5PMP0|A0A0J5PMP0_AS…	http://amigo.geneontology.org/cgi-bin/amigo/term_details?term=GO:0044267
mitotic sister chromatid separation	Gene Ontology	GO:0051306	3	18	0.000904897	0.0400236	tr|A0A0J5PVE5|A0A0J5PVE5_ASPFM|tr|A0A0J5PMP0|A0A0J5PMP0_ASPFM|tr|A0A0J5Q6M9|A0A0J5Q6M9_ASPFM	http://amigo.geneontology.org/cgi-bin/amigo/term_details?term=GO:0051306
regulation of G0 to G1 transition	Gene Ontology	GO:0070316	3	18	0.000904897	0.0400236	tr|A0A0J5PV51|A0A0J5PV51_ASPFM|tr|A0A0J5Q1I3|A0A0J5Q1I3_ASPFM|tr|A0A0J5PUK7|A0A0J5PUK7_ASPFM	http://amigo.geneontology.org/cgi-bin/amigo/term_details?term=GO:0070316
metaphase/anaphase transition of cell cycle	Gene Ontology	GO:0044784	3	18	0.000904897	0.0400236	tr|A0A0J5PVE5|A0A0J5PVE5_ASPFM|tr|A0A0J5PMP0|A0A0J5PMP0_ASPFM|tr|A0A0J5Q6M9|A0A0J5Q6M9_ASPFM	http://amigo.geneontology.org/cgi-bin/amigo/term_details?term=GO:0044784
negative regulation of G0 to G1 transition	Gene Ontology	GO:0070317	3	18	0.000904897	0.0400236	tr|A0A0J5PV51|A0A0J5PV51_ASPFM|tr|A0A0J5Q1I3|A0A0J5Q1I3_ASPFM|tr|A0A0J5PUK7|A0A0J5PUK7_ASPFM	http://amigo.geneontology.org/cgi-bin/amigo/term_details?term=GO:0070317
G0 to G1 transition	Gene Ontology	GO:0045023	3	18	0.000904897	0.0400236	tr|A0A0J5PV51|A0A0J5PV51_ASPFM|tr|A0A0J5Q1I3|A0A0J5Q1I3_ASPFM|tr|A0A0J5PUK7|A0A0J5PUK7_ASPFM	http://amigo.geneontology.org/cgi-bin/amigo/term_details?term=GO:0045023
metaphase/anaphase transition of mitotic cell cycle	Gene Ontology	GO:0007091	3	18	0.000904897	0.0400236	tr|A0A0J5PVE5|A0A0J5PVE5_ASPFM|tr|A0A0J5PMP0|A0A0J5PMP0_ASPFM|tr|A0A0J5Q6M9|A0A0J5Q6M9_ASPFM	http://amigo.geneontology.org/cgi-bin/amigo/term_details?term=GO:0007091
peroxisome	Gene Ontology	GO:0005777	5	77	0.000947751	0.0400236	tr|A0A0J5PKZ7|A0A0J5PKZ7_ASPFM|tr|A0A0J5PRC9|A0A0J5PRC9_ASPFM|tr|A0A0J5PF02|A0A0J5PF02_ASPFM|tr|A0A0J5Q1B9|A0A0J5Q1B9_ASPFM|tr|A0A0J5PVE0|A0A0J5PVE0_ASPFM	http://amigo.geneontology.org/cgi-bin/amigo/term_details?term=GO:0005777
microbody	Gene Ontology	GO:0042579	5	77	0.000947751	0.0400236	tr|A0A0J5PKZ7|A0A0J5PKZ7_ASPFM|tr|A0A0J5PRC9|A0A0J5PRC9_ASPFM|tr|A0A0J5PF02|A0A0J5PF02_ASPFM|tr|A0A0J5Q1B9|A0A0J5Q1B9_ASPFM|tr|A0A0J5PVE0|A0A0J5PVE0_ASPFM	http://amigo.geneontology.org/cgi-bin/amigo/term_details?term=GO:0042579
regulation of cell cycle	Gene Ontology	GO:0051726	7	164	0.00101113	0.0400236	tr|A0A0J5Q6M9|A0A0J5Q6M9_ASPFM|tr|A0A0J5PUK7|A0A0J5PUK7_ASPFM|tr|A0A0J5PVE5|A0A0J5PVE5_ASPFM|tr|A0A0J5SQG5|A0A0J5SQG5_ASPFM|tr|A0A0J5Q1I3|A0A0J5Q1I3_ASPFM|tr|A0A0J5PV51|A0A0J5PV51_ASPFM|tr|A0A0J5PMP0|A0A0J5PMP0_ASPFM	http://amigo.geneontology.org/cgi-bin/amigo/term_details?term=GO:0051726
protein complex	Gene Ontology	GO:0043234	16	722	0.0010938	0.0400236	tr|A0A0J5PRS9|A0A0J5PRS9_ASPFM|tr|A0A0J5Q5A4|A0A0J5Q5A4_ASPFM|tr|A0A0J5PDH8|A0A0J5PDH8_ASPFM|tr|A0A0J5Q6M9|A0A0J5Q6M9_ASPFM|tr|A0A0J5PKZ7|A0A0J5PKZ7_ASPFM|tr|A0A0J5Q0U9|A0A0J5Q0U9_ASPFM|tr|A0A0J5PVE5|A0A0J5PVE5_ASPFM|tr|A0A0J5PQL3|A0A0J5PQL3_ASPFM|tr|A0A0J5PUB3|A0A0J5PUB3_ASPFM|tr|A0A0J5Q2W2|A0A0J5Q2W2_ASPFM|tr|A0A0J5PI11|A0A0J5PI11_ASPFM|tr|A0A0J5Q1L6|A0A0J5Q1L6_ASPFM|tr|A0A0J5PV51|A0A0J5PV51_AS…	http://amigo.geneontology.org/cgi-bin/amigo/term_details?term=GO:0043234
cellular protein localization	Gene Ontology	GO:0034613	9	273	0.0011579	0.0400236	tr|A0A0J5PV51|A0A0J5PV51_ASPFM|tr|A0A0J5Q1I3|A0A0J5Q1I3_ASPFM|tr|A0A0J5PZF9|A0A0J5PZF9_ASPFM|tr|A0A0J5SQG5|A0A0J5SQG5_ASPFM|tr|A0A0J5PUB3|A0A0J5PUB3_ASPFM|tr|A0A0J5PVS4|A0A0J5PVS4_ASPFM|tr|A0A0J5PRS9|A0A0J5PRS9_ASPFM|tr|A0A0J5PMP0|A0A0J5PMP0_ASPFM|tr|A0A0J5PH08|A0A0J5PH08_ASPFM	http://amigo.geneontology.org/cgi-bin/amigo/term_details?term=GO:0034613
regulation of mitotic metaphase/anaphase transition	Gene Ontology	GO:0030071	3	20	0.00118893	0.0400236	tr|A0A0J5PVE5|A0A0J5PVE5_ASPFM|tr|A0A0J5PMP0|A0A0J5PMP0_ASPFM|tr|A0A0J5Q6M9|A0A0J5Q6M9_ASPFM	http://amigo.geneontology.org/cgi-bin/amigo/term_details?term=GO:0030071
regulation of mitotic sister chromatid separation	Gene Ontology	GO:0010965	3	20	0.00118893	0.0400236	tr|A0A0J5PVE5|A0A0J5PVE5_ASPFM|tr|A0A0J5PMP0|A0A0J5PMP0_ASPFM|tr|A0A0J5Q6M9|A0A0J5Q6M9_ASPFM	http://amigo.geneontology.org/cgi-bin/amigo/term_details?term=GO:0010965
regulation of metaphase/anaphase transition of cell cycle	Gene Ontology	GO:1902099	3	20	0.00118893	0.0400236	tr|A0A0J5PVE5|A0A0J5PVE5_ASPFM|tr|A0A0J5PMP0|A0A0J5PMP0_ASPFM|tr|A0A0J5Q6M9|A0A0J5Q6M9_ASPFM	http://amigo.geneontology.org/cgi-bin/amigo/term_details?term=GO:1902099
intracellular transport	Gene Ontology	GO:0046907	9	275	0.0012166	0.0400236	tr|A0A0J5PHI4|A0A0J5PHI4_ASPFM|tr|A0A0J5PKZ7|A0A0J5PKZ7_ASPFM|tr|A0A0J5Q1I3|A0A0J5Q1I3_ASPFM|tr|A0A0J5PZF9|A0A0J5PZF9_ASPFM|tr|A0A0J5SQG5|A0A0J5SQG5_ASPFM|tr|A0A0J5PV51|A0A0J5PV51_ASPFM|tr|A0A0J5PVS4|A0A0J5PVS4_ASPFM|tr|A0A0J5PRS9|A0A0J5PRS9_ASPFM|tr|A0A0J5PH08|A0A0J5PH08_ASPFM	http://amigo.geneontology.org/cgi-bin/amigo/term_details?term=GO:0046907
intracellular membrane-bounded organelle	Gene Ontology	GO:0043231	37	2493	0.00123323	0.0400236	tr|A0A0J5PF02|A0A0J5PF02_ASPFM|tr|A0A0J5Q2W2|A0A0J5Q2W2_ASPFM|tr|A0A0J5PZF9|A0A0J5PZF9_ASPFM|tr|A0A0J5PQL3|A0A0J5PQL3_ASPFM|tr|A0A0J5Q4T5|A0A0J5Q4T5_ASPFM|tr|A0A0J5Q3U7|A0A0J5Q3U7_ASPFM|tr|A0A0J5STT4|A0A0J5STT4_ASPFM|tr|A0A0J5PRM9|A0A0J5PRM9_ASPFM|tr|A0A0J5PWF4|A0A0J5PWF4_ASPFM|tr|A0A0J5PHI4|A0A0J5PHI4_ASPFM|tr|A0A0J5PUK7|A0A0J5PUK7_ASPFM|tr|A0A0J5PKZ7|A0A0J5PKZ7_ASPFM|tr|A0A0J5PNA9|A0A0J5PNA9_AS…	http://amigo.geneontology.org/cgi-bin/amigo/term_details?term=GO:0043231
membrane-bounded organelle	Gene Ontology	GO:0043227	37	2493	0.00123323	0.0400236	tr|A0A0J5PF02|A0A0J5PF02_ASPFM|tr|A0A0J5Q2W2|A0A0J5Q2W2_ASPFM|tr|A0A0J5PZF9|A0A0J5PZF9_ASPFM|tr|A0A0J5PQL3|A0A0J5PQL3_ASPFM|tr|A0A0J5Q4T5|A0A0J5Q4T5_ASPFM|tr|A0A0J5Q3U7|A0A0J5Q3U7_ASPFM|tr|A0A0J5STT4|A0A0J5STT4_ASPFM|tr|A0A0J5PRM9|A0A0J5PRM9_ASPFM|tr|A0A0J5PWF4|A0A0J5PWF4_ASPFM|tr|A0A0J5PHI4|A0A0J5PHI4_ASPFM|tr|A0A0J5PUK7|A0A0J5PUK7_ASPFM|tr|A0A0J5PKZ7|A0A0J5PKZ7_ASPFM|tr|A0A0J5PNA9|A0A0J5PNA9_AS…	http://amigo.geneontology.org/cgi-bin/amigo/term_details?term=GO:0043227
cellular macromolecule localization	Gene Ontology	GO:0070727	9	276	0.00124684	0.0400236	tr|A0A0J5PV51|A0A0J5PV51_ASPFM|tr|A0A0J5Q1I3|A0A0J5Q1I3_ASPFM|tr|A0A0J5PZF9|A0A0J5PZF9_ASPFM|tr|A0A0J5SQG5|A0A0J5SQG5_ASPFM|tr|A0A0J5PUB3|A0A0J5PUB3_ASPFM|tr|A0A0J5PVS4|A0A0J5PVS4_ASPFM|tr|A0A0J5PRS9|A0A0J5PRS9_ASPFM|tr|A0A0J5PMP0|A0A0J5PMP0_ASPFM|tr|A0A0J5PH08|A0A0J5PH08_ASPFM	http://amigo.geneontology.org/cgi-bin/amigo/term_details?term=GO:0070727
localization	Gene Ontology	GO:0051179	19	959	0.00133124	0.0412628	tr|A0A0J5PTR2|A0A0J5PTR2_ASPFM|tr|A0A0J5Q2G5|A0A0J5Q2G5_ASPFM|tr|A0A0J5PQE4|A0A0J5PQE4_ASPFM|tr|A0A0J5PH08|A0A0J5PH08_ASPFM|tr|A0A0J5PHI4|A0A0J5PHI4_ASPFM|tr|A0A0J5PN06|A0A0J5PN06_ASPFM|tr|A0A0J5PKZ7|A0A0J5PKZ7_ASPFM|tr|A0A0J5PQL3|A0A0J5PQL3_ASPFM|tr|A0A0J5Q0U9|A0A0J5Q0U9_ASPFM|tr|A0A0J5SQG5|A0A0J5SQG5_ASPFM|tr|A0A0J5PUB3|A0A0J5PUB3_ASPFM|tr|A0A0J5PV51|A0A0J5PV51_ASPFM|tr|A0A0J5Q4T5|A0A0J5Q4T5_AS…	http://amigo.geneontology.org/cgi-bin/amigo/term_details?term=GO:0051179
chromosome separation	Gene Ontology	GO:0051304	3	21	0.00134972	0.0412628	tr|A0A0J5PVE5|A0A0J5PVE5_ASPFM|tr|A0A0J5PMP0|A0A0J5PMP0_ASPFM|tr|A0A0J5Q6M9|A0A0J5Q6M9_ASPFM	http://amigo.geneontology.org/cgi-bin/amigo/term_details?term=GO:0051304
regulation of mitotic nuclear division	Gene Ontology	GO:0007088	4	51	0.00163507	0.0471955	tr|A0A0J5PVE5|A0A0J5PVE5_ASPFM|tr|A0A0J5PMP0|A0A0J5PMP0_ASPFM|tr|A0A0J5SQG5|A0A0J5SQG5_ASPFM|tr|A0A0J5Q6M9|A0A0J5Q6M9_ASPFM	http://amigo.geneontology.org/cgi-bin/amigo/term_details?term=GO:0007088
farnesyl diphosphate biosynthetic process	Gene Ontology	GO:0045337	2	5	0.00172756	0.0471955	tr|A0A0J5PUK7|A0A0J5PUK7_ASPFM|tr|A0A0J5Q6L6|A0A0J5Q6L6_ASPFM	http://amigo.geneontology.org/cgi-bin/amigo/term_details?term=GO:0045337
farnesyl diphosphate metabolic process	Gene Ontology	GO:0045338	2	5	0.00172756	0.0471955	tr|A0A0J5PUK7|A0A0J5PUK7_ASPFM|tr|A0A0J5Q6L6|A0A0J5Q6L6_ASPFM	http://amigo.geneontology.org/cgi-bin/amigo/term_details?term=GO:0045338
proteasome regulatory particle, lid subcomplex	Gene Ontology	GO:0008541	2	5	0.00172756	0.0471955	tr|A0A0J5PVE5|A0A0J5PVE5_ASPFM|tr|A0A0J5Q6M9|A0A0J5Q6M9_ASPFM	http://amigo.geneontology.org/cgi-bin/amigo/term_details?term=GO:0008541
organonitrogen compound biosynthetic process	Gene Ontology	GO:1901566	12	482	0.00190921	0.0502838	tr|A0A0J5PRM9|A0A0J5PRM9_ASPFM|tr|A0A0J5Q1H9|A0A0J5Q1H9_ASPFM|tr|A0A0J5PKY1|A0A0J5PKY1_ASPFM|tr|A0A0J5PNA9|A0A0J5PNA9_ASPFM|tr|A0A0J5PQL3|A0A0J5PQL3_ASPFM|tr|A0A0J5Q0I9|A0A0J5Q0I9_ASPFM|tr|A0A0J5SQG5|A0A0J5SQG5_ASPFM|tr|A0A0J5SCF2|A0A0J5SCF2_ASPFM|tr|A0A0J5PI11|A0A0J5PI11_ASPFM|tr|A0A0J5PMP0|A0A0J5PMP0_ASPFM|tr|A0A0J5PIQ5|A0A0J5PIQ5_ASPFM|tr|A0A0J5Q4L0|A0A0J5Q4L0_ASPFM	http://amigo.geneontology.org/cgi-bin/amigo/term_details?term=GO:1901566
protein localization	Gene Ontology	GO:0008104	9	295	0.0019472	0.0502838	tr|A0A0J5PV51|A0A0J5PV51_ASPFM|tr|A0A0J5Q1I3|A0A0J5Q1I3_ASPFM|tr|A0A0J5PZF9|A0A0J5PZF9_ASPFM|tr|A0A0J5SQG5|A0A0J5SQG5_ASPFM|tr|A0A0J5PUB3|A0A0J5PUB3_ASPFM|tr|A0A0J5PVS4|A0A0J5PVS4_ASPFM|tr|A0A0J5PRS9|A0A0J5PRS9_ASPFM|tr|A0A0J5PMP0|A0A0J5PMP0_ASPFM|tr|A0A0J5PH08|A0A0J5PH08_ASPFM	http://amigo.geneontology.org/cgi-bin/amigo/term_details?term=GO:0008104
protein metabolic process	Gene Ontology	GO:0019538	15	695	0.00205545	0.0502838	tr|A0A0J5PDH8|A0A0J5PDH8_ASPFM|tr|A0A0J5Q4L0|A0A0J5Q4L0_ASPFM|tr|A0A0J5PKY1|A0A0J5PKY1_ASPFM|tr|A0A0J5Q2W2|A0A0J5Q2W2_ASPFM|tr|A0A0J5Q0I9|A0A0J5Q0I9_ASPFM|tr|A0A0J5PVE5|A0A0J5PVE5_ASPFM|tr|A0A0J5SQG5|A0A0J5SQG5_ASPFM|tr|A0A0J5PUB3|A0A0J5PUB3_ASPFM|tr|A0A0J5PNA9|A0A0J5PNA9_ASPFM|tr|A0A0J5PI11|A0A0J5PI11_ASPFM|tr|A0A0J5SQA8|A0A0J5SQA8_ASPFM|tr|A0A0J5Q1L6|A0A0J5Q1L6_ASPFM|tr|A0A0J5PMP0|A0A0J5PMP0_AS…	http://amigo.geneontology.org/cgi-bin/amigo/term_details?term=GO:0019538
structural molecule activity	Gene Ontology	GO:0005198	6	137	0.00206296	0.0502838	tr|A0A0J5Q6M9|A0A0J5Q6M9_ASPFM|tr|A0A0J5PKY1|A0A0J5PKY1_ASPFM|tr|A0A0J5PNA9|A0A0J5PNA9_ASPFM|tr|A0A0J5Q0I9|A0A0J5Q0I9_ASPFM|tr|A0A0J5Q4L0|A0A0J5Q4L0_ASPFM|tr|A0A0J5PZF9|A0A0J5PZF9_ASPFM	http://amigo.geneontology.org/cgi-bin/amigo/term_details?term=GO:0005198
establishment of localization in cell	Gene Ontology	GO:0051649	9	298	0.00208206	0.0502838	tr|A0A0J5PHI4|A0A0J5PHI4_ASPFM|tr|A0A0J5PKZ7|A0A0J5PKZ7_ASPFM|tr|A0A0J5Q1I3|A0A0J5Q1I3_ASPFM|tr|A0A0J5PZF9|A0A0J5PZF9_ASPFM|tr|A0A0J5SQG5|A0A0J5SQG5_ASPFM|tr|A0A0J5PV51|A0A0J5PV51_ASPFM|tr|A0A0J5PVS4|A0A0J5PVS4_ASPFM|tr|A0A0J5PRS9|A0A0J5PRS9_ASPFM|tr|A0A0J5PH08|A0A0J5PH08_ASPFM	http://amigo.geneontology.org/cgi-bin/amigo/term_details?term=GO:0051649
positive regulation of filamentous growth of a population of unicellular organisms	Gene Ontology	GO:1900430	3	25	0.00212702	0.0502838	tr|A0A0J5PMP0|A0A0J5PMP0_ASPFM|tr|A0A0J5SQG5|A0A0J5SQG5_ASPFM|tr|A0A0J5PHI4|A0A0J5PHI4_ASPFM	http://amigo.geneontology.org/cgi-bin/amigo/term_details?term=GO:1900430
positive regulation of filamentous growth	Gene Ontology	GO:0090033	3	25	0.00212702	0.0502838	tr|A0A0J5PMP0|A0A0J5PMP0_ASPFM|tr|A0A0J5SQG5|A0A0J5SQG5_ASPFM|tr|A0A0J5PHI4|A0A0J5PHI4_ASPFM	http://amigo.geneontology.org/cgi-bin/amigo/term_details?term=GO:0090033
intracellular protein transport	Gene Ontology	GO:0006886	7	188	0.0021539	0.0502838	tr|A0A0J5PV51|A0A0J5PV51_ASPFM|tr|A0A0J5Q1I3|A0A0J5Q1I3_ASPFM|tr|A0A0J5PZF9|A0A0J5PZF9_ASPFM|tr|A0A0J5SQG5|A0A0J5SQG5_ASPFM|tr|A0A0J5PVS4|A0A0J5PVS4_ASPFM|tr|A0A0J5PRS9|A0A0J5PRS9_ASPFM|tr|A0A0J5PH08|A0A0J5PH08_ASPFM	http://amigo.geneontology.org/cgi-bin/amigo/term_details?term=GO:0006886
positive regulation of mitotic sister chromatid separation	Gene Ontology	GO:1901970	2	6	0.00228956	0.050686	tr|A0A0J5PVE5|A0A0J5PVE5_ASPFM|tr|A0A0J5Q6M9|A0A0J5Q6M9_ASPFM	http://amigo.geneontology.org/cgi-bin/amigo/term_details?term=GO:1901970
positive regulation of metaphase/anaphase transition of cell cycle	Gene Ontology	GO:1902101	2	6	0.00228956	0.050686	tr|A0A0J5PVE5|A0A0J5PVE5_ASPFM|tr|A0A0J5Q6M9|A0A0J5Q6M9_ASPFM	http://amigo.geneontology.org/cgi-bin/amigo/term_details?term=GO:1902101
positive regulation of mitotic metaphase/anaphase transition	Gene Ontology	GO:0045842	2	6	0.00228956	0.050686	tr|A0A0J5PVE5|A0A0J5PVE5_ASPFM|tr|A0A0J5Q6M9|A0A0J5Q6M9_ASPFM	http://amigo.geneontology.org/cgi-bin/amigo/term_details?term=GO:0045842
single-organism localization	Gene Ontology	GO:1902578	9	304	0.00237422	0.0516695	tr|A0A0J5Q2G5|A0A0J5Q2G5_ASPFM|tr|A0A0J5PHI4|A0A0J5PHI4_ASPFM|tr|A0A0J5PKZ7|A0A0J5PKZ7_ASPFM|tr|A0A0J5SQG5|A0A0J5SQG5_ASPFM|tr|A0A0J5PQL3|A0A0J5PQL3_ASPFM|tr|A0A0J5PV51|A0A0J5PV51_ASPFM|tr|A0A0J5Q4T5|A0A0J5Q4T5_ASPFM|tr|A0A0J5PRS9|A0A0J5PRS9_ASPFM|tr|A0A0J5PMP0|A0A0J5PMP0_ASPFM	http://amigo.geneontology.org/cgi-bin/amigo/term_details?term=GO:1902578
pyrophosphatase activity	Gene Ontology	GO:0016462	9	306	0.00247857	0.0518935	tr|A0A0J5SKW5|A0A0J5SKW5_ASPFM|tr|A0A0J5PV51|A0A0J5PV51_ASPFM|tr|A0A0J5PKZ7|A0A0J5PKZ7_ASPFM|tr|A0A0J5SQG5|A0A0J5SQG5_ASPFM|tr|A0A0J5PQL3|A0A0J5PQL3_ASPFM|tr|A0A0J5PRS9|A0A0J5PRS9_ASPFM|tr|A0A0J5STT4|A0A0J5STT4_ASPFM|tr|A0A0J5PRC9|A0A0J5PRC9_ASPFM|tr|A0A0J5Q3U7|A0A0J5Q3U7_ASPFM	http://amigo.geneontology.org/cgi-bin/amigo/term_details?term=GO:0016462
hydrolase activity, acting on acid anhydrides, in phosphorus-containing anhydrides	Gene Ontology	GO:0016818	9	306	0.00247857	0.0518935	tr|A0A0J5SKW5|A0A0J5SKW5_ASPFM|tr|A0A0J5PV51|A0A0J5PV51_ASPFM|tr|A0A0J5PKZ7|A0A0J5PKZ7_ASPFM|tr|A0A0J5SQG5|A0A0J5SQG5_ASPFM|tr|A0A0J5PQL3|A0A0J5PQL3_ASPFM|tr|A0A0J5PRS9|A0A0J5PRS9_ASPFM|tr|A0A0J5STT4|A0A0J5STT4_ASPFM|tr|A0A0J5PRC9|A0A0J5PRC9_ASPFM|tr|A0A0J5Q3U7|A0A0J5Q3U7_ASPFM	http://amigo.geneontology.org/cgi-bin/amigo/term_details?term=GO:0016818
hydrolase activity, acting on acid anhydrides	Gene Ontology	GO:0016817	9	307	0.0025321	0.0518935	tr|A0A0J5SKW5|A0A0J5SKW5_ASPFM|tr|A0A0J5PV51|A0A0J5PV51_ASPFM|tr|A0A0J5PKZ7|A0A0J5PKZ7_ASPFM|tr|A0A0J5SQG5|A0A0J5SQG5_ASPFM|tr|A0A0J5PQL3|A0A0J5PQL3_ASPFM|tr|A0A0J5PRS9|A0A0J5PRS9_ASPFM|tr|A0A0J5STT4|A0A0J5STT4_ASPFM|tr|A0A0J5PRC9|A0A0J5PRC9_ASPFM|tr|A0A0J5Q3U7|A0A0J5Q3U7_ASPFM	http://amigo.geneontology.org/cgi-bin/amigo/term_details?term=GO:0016817
cytosolic ribosome	Gene Ontology	GO:0022626	4	58	0.00254618	0.0518935	tr|A0A0J5PNA9|A0A0J5PNA9_ASPFM|tr|A0A0J5Q0I9|A0A0J5Q0I9_ASPFM|tr|A0A0J5PKY1|A0A0J5PKY1_ASPFM|tr|A0A0J5Q4L0|A0A0J5Q4L0_ASPFM	http://amigo.geneontology.org/cgi-bin/amigo/term_details?term=GO:0022626
proteasome complex	Gene Ontology	GO:0000502	3	27	0.0026011	0.0521806	tr|A0A0J5Q2W2|A0A0J5Q2W2_ASPFM|tr|A0A0J5PVE5|A0A0J5PVE5_ASPFM|tr|A0A0J5Q6M9|A0A0J5Q6M9_ASPFM	http://amigo.geneontology.org/cgi-bin/amigo/term_details?term=GO:0000502
ribonucleoprotein complex	Gene Ontology	GO:1990904	9	310	0.00269822	0.0521806	tr|A0A0J5SKW5|A0A0J5SKW5_ASPFM|tr|A0A0J5PI11|A0A0J5PI11_ASPFM|tr|A0A0J5PKY1|A0A0J5PKY1_ASPFM|tr|A0A0J5PNA9|A0A0J5PNA9_ASPFM|tr|A0A0J5Q0I9|A0A0J5Q0I9_ASPFM|tr|A0A0J5PUB3|A0A0J5PUB3_ASPFM|tr|A0A0J5PNE9|A0A0J5PNE9_ASPFM|tr|A0A0J5Q4L0|A0A0J5Q4L0_ASPFM|tr|A0A0J5Q1L6|A0A0J5Q1L6_ASPFM	http://amigo.geneontology.org/cgi-bin/amigo/term_details?term=GO:1990904
intracellular ribonucleoprotein complex	Gene Ontology	GO:0030529	9	310	0.00269822	0.0521806	tr|A0A0J5SKW5|A0A0J5SKW5_ASPFM|tr|A0A0J5PI11|A0A0J5PI11_ASPFM|tr|A0A0J5PKY1|A0A0J5PKY1_ASPFM|tr|A0A0J5PNA9|A0A0J5PNA9_ASPFM|tr|A0A0J5Q0I9|A0A0J5Q0I9_ASPFM|tr|A0A0J5PUB3|A0A0J5PUB3_ASPFM|tr|A0A0J5PNE9|A0A0J5PNE9_ASPFM|tr|A0A0J5Q4L0|A0A0J5Q4L0_ASPFM|tr|A0A0J5Q1L6|A0A0J5Q1L6_ASPFM	http://amigo.geneontology.org/cgi-bin/amigo/term_details?term=GO:0030529
negative regulation of cell cycle	Gene Ontology	GO:0045786	5	99	0.00272467	0.0521806	tr|A0A0J5PV51|A0A0J5PV51_ASPFM|tr|A0A0J5Q1I3|A0A0J5Q1I3_ASPFM|tr|A0A0J5PMP0|A0A0J5PMP0_ASPFM|tr|A0A0J5SQG5|A0A0J5SQG5_ASPFM|tr|A0A0J5PUK7|A0A0J5PUK7_ASPFM	http://amigo.geneontology.org/cgi-bin/amigo/term_details?term=GO:0045786
programmed cell death	Gene Ontology	GO:0012501	3	28	0.00286065	0.0521806	tr|A0A0J5PMP0|A0A0J5PMP0_ASPFM|tr|A0A0J5SQG5|A0A0J5SQG5_ASPFM|tr|A0A0J5PEJ8|A0A0J5PEJ8_ASPFM	http://amigo.geneontology.org/cgi-bin/amigo/term_details?term=GO:0012501
cell death	Gene Ontology	GO:0008219	3	28	0.00286065	0.0521806	tr|A0A0J5PMP0|A0A0J5PMP0_ASPFM|tr|A0A0J5SQG5|A0A0J5SQG5_ASPFM|tr|A0A0J5PEJ8|A0A0J5PEJ8_ASPFM	http://amigo.geneontology.org/cgi-bin/amigo/term_details?term=GO:0008219
regulation of apoptotic process	Gene Ontology	GO:0042981	2	7	0.00292602	0.0521806	tr|A0A0J5PMP0|A0A0J5PMP0_ASPFM|tr|A0A0J5SQG5|A0A0J5SQG5_ASPFM	http://amigo.geneontology.org/cgi-bin/amigo/term_details?term=GO:0042981
regulation of cell death	Gene Ontology	GO:0010941	2	7	0.00292602	0.0521806	tr|A0A0J5PMP0|A0A0J5PMP0_ASPFM|tr|A0A0J5SQG5|A0A0J5SQG5_ASPFM	http://amigo.geneontology.org/cgi-bin/amigo/term_details?term=GO:0010941
regulation of programmed cell death	Gene Ontology	GO:0043067	2	7	0.00292602	0.0521806	tr|A0A0J5PMP0|A0A0J5PMP0_ASPFM|tr|A0A0J5SQG5|A0A0J5SQG5_ASPFM	http://amigo.geneontology.org/cgi-bin/amigo/term_details?term=GO:0043067
mitochondrial membrane	Gene Ontology	GO:0031966	6	149	0.00308881	0.0529754	tr|A0A0J5Q5A4|A0A0J5Q5A4_ASPFM|tr|A0A0J5PV51|A0A0J5PV51_ASPFM|tr|A0A0J5Q0U9|A0A0J5Q0U9_ASPFM|tr|A0A0J5PQL3|A0A0J5PQL3_ASPFM|tr|A0A0J5Q3U7|A0A0J5Q3U7_ASPFM|tr|A0A0J5Q1B9|A0A0J5Q1B9_ASPFM	http://amigo.geneontology.org/cgi-bin/amigo/term_details?term=GO:0031966
RNA binding	Gene Ontology	GO:0003723	7	201	0.0030935	0.0529754	tr|A0A0J5SKW5|A0A0J5SKW5_ASPFM|tr|A0A0J5PKY1|A0A0J5PKY1_ASPFM|tr|A0A0J5PNA9|A0A0J5PNA9_ASPFM|tr|A0A0J5Q0I9|A0A0J5Q0I9_ASPFM|tr|A0A0J5Q4L0|A0A0J5Q4L0_ASPFM|tr|A0A0J5PNE9|A0A0J5PNE9_ASPFM|tr|A0A0J5PIQ5|A0A0J5PIQ5_ASPFM	http://amigo.geneontology.org/cgi-bin/amigo/term_details?term=GO:0003723
cell aging	Gene Ontology	GO:0007569	3	29	0.00313561	0.0529754	tr|A0A0J5Q0U9|A0A0J5Q0U9_ASPFM|tr|A0A0J5SQG5|A0A0J5SQG5_ASPFM|tr|A0A0J5Q1B9|A0A0J5Q1B9_ASPFM	http://amigo.geneontology.org/cgi-bin/amigo/term_details?term=GO:0007569
yeast-form cell wall	Gene Ontology	GO:0030445	3	29	0.00313561	0.0529754	tr|A0A0J5PWF4|A0A0J5PWF4_ASPFM|tr|A0A0J5PMP0|A0A0J5PMP0_ASPFM|tr|A0A0J5Q4L0|A0A0J5Q4L0_ASPFM	http://amigo.geneontology.org/cgi-bin/amigo/term_details?term=GO:0030445
aging	Gene Ontology	GO:0007568	3	30	0.00342627	0.0571341	tr|A0A0J5Q0U9|A0A0J5Q0U9_ASPFM|tr|A0A0J5SQG5|A0A0J5SQG5_ASPFM|tr|A0A0J5Q1B9|A0A0J5Q1B9_ASPFM	http://amigo.geneontology.org/cgi-bin/amigo/term_details?term=GO:0007568
amino acid binding	Gene Ontology	GO:0016597	2	8	0.00363555	0.0598368	tr|A0A0J5PMP0|A0A0J5PMP0_ASPFM|tr|A0A0J5SCF2|A0A0J5SCF2_ASPFM	http://amigo.geneontology.org/cgi-bin/amigo/term_details?term=GO:0016597
endomembrane system	Gene Ontology	GO:0012505	12	523	0.00368155	0.0598368	tr|A0A0J5PRS9|A0A0J5PRS9_ASPFM|tr|A0A0J5PUK7|A0A0J5PUK7_ASPFM|tr|A0A0J5PHI4|A0A0J5PHI4_ASPFM|tr|A0A0J5PKZ7|A0A0J5PKZ7_ASPFM|tr|A0A0J5PN06|A0A0J5PN06_ASPFM|tr|A0A0J5PZF9|A0A0J5PZF9_ASPFM|tr|A0A0J5SQG5|A0A0J5SQG5_ASPFM|tr|A0A0J5PVE5|A0A0J5PVE5_ASPFM|tr|A0A0J5Q4T5|A0A0J5Q4T5_ASPFM|tr|A0A0J5Q1L6|A0A0J5Q1L6_ASPFM|tr|A0A0J5PV51|A0A0J5PV51_ASPFM|tr|A0A0J5PH08|A0A0J5PH08_ASPFM	http://amigo.geneontology.org/cgi-bin/amigo/term_details?term=GO:0012505
cytosolic large ribosomal subunit	Gene Ontology	GO:0022625	3	31	0.0037329	0.059913	tr|A0A0J5PNA9|A0A0J5PNA9_ASPFM|tr|A0A0J5Q0I9|A0A0J5Q0I9_ASPFM|tr|A0A0J5PKY1|A0A0J5PKY1_ASPFM	http://amigo.geneontology.org/cgi-bin/amigo/term_details?term=GO:0022625
protein transport	Gene Ontology	GO:0015031	7	209	0.00381099	0.0604113	tr|A0A0J5PV51|A0A0J5PV51_ASPFM|tr|A0A0J5Q1I3|A0A0J5Q1I3_ASPFM|tr|A0A0J5PZF9|A0A0J5PZF9_ASPFM|tr|A0A0J5SQG5|A0A0J5SQG5_ASPFM|tr|A0A0J5PVS4|A0A0J5PVS4_ASPFM|tr|A0A0J5PRS9|A0A0J5PRS9_ASPFM|tr|A0A0J5PH08|A0A0J5PH08_ASPFM	http://amigo.geneontology.org/cgi-bin/amigo/term_details?term=GO:0015031
macromolecule localization	Gene Ontology	GO:0033036	9	330	0.00403957	0.0627422	tr|A0A0J5PV51|A0A0J5PV51_ASPFM|tr|A0A0J5Q1I3|A0A0J5Q1I3_ASPFM|tr|A0A0J5PZF9|A0A0J5PZF9_ASPFM|tr|A0A0J5SQG5|A0A0J5SQG5_ASPFM|tr|A0A0J5PUB3|A0A0J5PUB3_ASPFM|tr|A0A0J5PVS4|A0A0J5PVS4_ASPFM|tr|A0A0J5PRS9|A0A0J5PRS9_ASPFM|tr|A0A0J5PMP0|A0A0J5PMP0_ASPFM|tr|A0A0J5PH08|A0A0J5PH08_ASPFM	http://amigo.geneontology.org/cgi-bin/amigo/term_details?term=GO:0033036
cytoplasmic translation	Gene Ontology	GO:0002181	3	32	0.00405576	0.0627422	tr|A0A0J5PKY1|A0A0J5PKY1_ASPFM|tr|A0A0J5PIQ5|A0A0J5PIQ5_ASPFM|tr|A0A0J5PI11|A0A0J5PI11_ASPFM	http://amigo.geneontology.org/cgi-bin/amigo/term_details?term=GO:0002181
establishment of protein localization	Gene Ontology	GO:0045184	7	213	0.00421413	0.0644161	tr|A0A0J5PV51|A0A0J5PV51_ASPFM|tr|A0A0J5Q1I3|A0A0J5Q1I3_ASPFM|tr|A0A0J5PZF9|A0A0J5PZF9_ASPFM|tr|A0A0J5SQG5|A0A0J5SQG5_ASPFM|tr|A0A0J5PVS4|A0A0J5PVS4_ASPFM|tr|A0A0J5PRS9|A0A0J5PRS9_ASPFM|tr|A0A0J5PH08|A0A0J5PH08_ASPFM	http://amigo.geneontology.org/cgi-bin/amigo/term_details?term=GO:0045184
regulation of nuclear division	Gene Ontology	GO:0051783	4	68	0.00437808	0.0650565	tr|A0A0J5PVE5|A0A0J5PVE5_ASPFM|tr|A0A0J5PMP0|A0A0J5PMP0_ASPFM|tr|A0A0J5SQG5|A0A0J5SQG5_ASPFM|tr|A0A0J5Q6M9|A0A0J5Q6M9_ASPFM	http://amigo.geneontology.org/cgi-bin/amigo/term_details?term=GO:0051783
intracellular organelle part	Gene Ontology	GO:0044446	21	1235	0.00458437	0.0650565	tr|A0A0J5PN06|A0A0J5PN06_ASPFM|tr|A0A0J5PV51|A0A0J5PV51_ASPFM|tr|A0A0J5Q5A4|A0A0J5Q5A4_ASPFM|tr|A0A0J5PH08|A0A0J5PH08_ASPFM|tr|A0A0J5PHI4|A0A0J5PHI4_ASPFM|tr|A0A0J5PKZ7|A0A0J5PKZ7_ASPFM|tr|A0A0J5PQL3|A0A0J5PQL3_ASPFM|tr|A0A0J5Q0I9|A0A0J5Q0I9_ASPFM|tr|A0A0J5PVE5|A0A0J5PVE5_ASPFM|tr|A0A0J5SQG5|A0A0J5SQG5_ASPFM|tr|A0A0J5PZF9|A0A0J5PZF9_ASPFM|tr|A0A0J5PNA9|A0A0J5PNA9_ASPFM|tr|A0A0J5PKY1|A0A0J5PKY1_AS…	http://amigo.geneontology.org/cgi-bin/amigo/term_details?term=GO:0044446
organelle localization	Gene Ontology	GO:0051640	4	69	0.0045996	0.0650565	tr|A0A0J5PKZ7|A0A0J5PKZ7_ASPFM|tr|A0A0J5PRS9|A0A0J5PRS9_ASPFM|tr|A0A0J5Q0U9|A0A0J5Q0U9_ASPFM|tr|A0A0J5SQG5|A0A0J5SQG5_ASPFM	http://amigo.geneontology.org/cgi-bin/amigo/term_details?term=GO:0051640
organonitrogen compound metabolic process	Gene Ontology	GO:1901564	14	683	0.00461744	0.0650565	tr|A0A0J5PRM9|A0A0J5PRM9_ASPFM|tr|A0A0J5PWF4|A0A0J5PWF4_ASPFM|tr|A0A0J5Q1H9|A0A0J5Q1H9_ASPFM|tr|A0A0J5PKY1|A0A0J5PKY1_ASPFM|tr|A0A0J5PNA9|A0A0J5PNA9_ASPFM|tr|A0A0J5PQL3|A0A0J5PQL3_ASPFM|tr|A0A0J5Q0I9|A0A0J5Q0I9_ASPFM|tr|A0A0J5SQG5|A0A0J5SQG5_ASPFM|tr|A0A0J5SCF2|A0A0J5SCF2_ASPFM|tr|A0A0J5PI11|A0A0J5PI11_ASPFM|tr|A0A0J5PRC9|A0A0J5PRC9_ASPFM|tr|A0A0J5PMP0|A0A0J5PMP0_ASPFM|tr|A0A0J5PIQ5|A0A0J5PIQ5_AS…	http://amigo.geneontology.org/cgi-bin/amigo/term_details?term=GO:1901564
organelle part	Gene Ontology	GO:0044422	21	1238	0.00471462	0.0650565	tr|A0A0J5PN06|A0A0J5PN06_ASPFM|tr|A0A0J5PV51|A0A0J5PV51_ASPFM|tr|A0A0J5Q5A4|A0A0J5Q5A4_ASPFM|tr|A0A0J5PH08|A0A0J5PH08_ASPFM|tr|A0A0J5PHI4|A0A0J5PHI4_ASPFM|tr|A0A0J5PKZ7|A0A0J5PKZ7_ASPFM|tr|A0A0J5PQL3|A0A0J5PQL3_ASPFM|tr|A0A0J5Q0I9|A0A0J5Q0I9_ASPFM|tr|A0A0J5PVE5|A0A0J5PVE5_ASPFM|tr|A0A0J5SQG5|A0A0J5SQG5_ASPFM|tr|A0A0J5PZF9|A0A0J5PZF9_ASPFM|tr|A0A0J5PNA9|A0A0J5PNA9_ASPFM|tr|A0A0J5PKY1|A0A0J5PKY1_AS…	http://amigo.geneontology.org/cgi-bin/amigo/term_details?term=GO:0044422
positive regulation of growth	Gene Ontology	GO:0045927	3	34	0.00475122	0.0650565	tr|A0A0J5PMP0|A0A0J5PMP0_ASPFM|tr|A0A0J5SQG5|A0A0J5SQG5_ASPFM|tr|A0A0J5PHI4|A0A0J5PHI4_ASPFM	http://amigo.geneontology.org/cgi-bin/amigo/term_details?term=GO:0045927
regulation of sister chromatid segregation	Gene Ontology	GO:0033045	3	34	0.00475122	0.0650565	tr|A0A0J5PVE5|A0A0J5PVE5_ASPFM|tr|A0A0J5PMP0|A0A0J5PMP0_ASPFM|tr|A0A0J5Q6M9|A0A0J5Q6M9_ASPFM	http://amigo.geneontology.org/cgi-bin/amigo/term_details?term=GO:0033045
regulation of mitotic sister chromatid segregation	Gene Ontology	GO:0033047	3	34	0.00475122	0.0650565	tr|A0A0J5PVE5|A0A0J5PVE5_ASPFM|tr|A0A0J5PMP0|A0A0J5PMP0_ASPFM|tr|A0A0J5Q6M9|A0A0J5Q6M9_ASPFM	http://amigo.geneontology.org/cgi-bin/amigo/term_details?term=GO:0033047
single-organism organelle organization	Gene Ontology	GO:1902589	7	218	0.0047627	0.0650565	tr|A0A0J5Q5A4|A0A0J5Q5A4_ASPFM|tr|A0A0J5Q6M9|A0A0J5Q6M9_ASPFM|tr|A0A0J5PKZ7|A0A0J5PKZ7_ASPFM|tr|A0A0J5Q0U9|A0A0J5Q0U9_ASPFM|tr|A0A0J5PVE5|A0A0J5PVE5_ASPFM|tr|A0A0J5PRS9|A0A0J5PRS9_ASPFM|tr|A0A0J5PMP0|A0A0J5PMP0_ASPFM	http://amigo.geneontology.org/cgi-bin/amigo/term_details?term=GO:1902589
cellular component organization or biogenesis	Gene Ontology	GO:0071840	17	916	0.00481658	0.0650999	tr|A0A0J5PRS9|A0A0J5PRS9_ASPFM|tr|A0A0J5PV51|A0A0J5PV51_ASPFM|tr|A0A0J5Q5A4|A0A0J5Q5A4_ASPFM|tr|A0A0J5Q6M9|A0A0J5Q6M9_ASPFM|tr|A0A0J5PEJ8|A0A0J5PEJ8_ASPFM|tr|A0A0J5PKZ7|A0A0J5PKZ7_ASPFM|tr|A0A0J5Q0U9|A0A0J5Q0U9_ASPFM|tr|A0A0J5PVE5|A0A0J5PVE5_ASPFM|tr|A0A0J5SQG5|A0A0J5SQG5_ASPFM|tr|A0A0J5PUB3|A0A0J5PUB3_ASPFM|tr|A0A0J5Q2W2|A0A0J5Q2W2_ASPFM|tr|A0A0J5Q1B9|A0A0J5Q1B9_ASPFM|tr|A0A0J5Q4L0|A0A0J5Q4L0_AS…	http://amigo.geneontology.org/cgi-bin/amigo/term_details?term=GO:0071840
small GTPase mediated signal transduction	Gene Ontology	GO:0007264	4	71	0.00506505	0.0677451	tr|A0A0J5PRS9|A0A0J5PRS9_ASPFM|tr|A0A0J5PV51|A0A0J5PV51_ASPFM|tr|A0A0J5PMP0|A0A0J5PMP0_ASPFM|tr|A0A0J5SQG5|A0A0J5SQG5_ASPFM	http://amigo.geneontology.org/cgi-bin/amigo/term_details?term=GO:0007264
positive regulation of mitotic cell cycle	Gene Ontology	GO:0045931	3	35	0.00512427	0.0678306	tr|A0A0J5PVE5|A0A0J5PVE5_ASPFM|tr|A0A0J5PMP0|A0A0J5PMP0_ASPFM|tr|A0A0J5Q6M9|A0A0J5Q6M9_ASPFM	http://amigo.geneontology.org/cgi-bin/amigo/term_details?term=GO:0045931
nucleus	Gene Ontology	GO:0005634	25	1591	0.00521392	0.068313	tr|A0A0J5Q2W2|A0A0J5Q2W2_ASPFM|tr|A0A0J5SQG5|A0A0J5SQG5_ASPFM|tr|A0A0J5PRM9|A0A0J5PRM9_ASPFM|tr|A0A0J5PWF4|A0A0J5PWF4_ASPFM|tr|A0A0J5PUK7|A0A0J5PUK7_ASPFM|tr|A0A0J5PKZ7|A0A0J5PKZ7_ASPFM|tr|A0A0J5PNA9|A0A0J5PNA9_ASPFM|tr|A0A0J5PWH4|A0A0J5PWH4_ASPFM|tr|A0A0J5PRC9|A0A0J5PRC9_ASPFM|tr|A0A0J5PDH8|A0A0J5PDH8_ASPFM|tr|A0A0J5STT4|A0A0J5STT4_ASPFM|tr|A0A0J5PS33|A0A0J5PS33_ASPFM|tr|A0A0J5Q1L6|A0A0J5Q1L6_AS…	http://amigo.geneontology.org/cgi-bin/amigo/term_details?term=GO:0005634
inner mitochondrial membrane organization	Gene Ontology	GO:0007007	2	10	0.00526832	0.0683286	tr|A0A0J5Q5A4|A0A0J5Q5A4_ASPFM|tr|A0A0J5Q0U9|A0A0J5Q0U9_ASPFM	http://amigo.geneontology.org/cgi-bin/amigo/term_details?term=GO:0007007
regulation of chromosome segregation	Gene Ontology	GO:0051983	3	36	0.00551452	0.0708064	tr|A0A0J5PVE5|A0A0J5PVE5_ASPFM|tr|A0A0J5PMP0|A0A0J5PMP0_ASPFM|tr|A0A0J5Q6M9|A0A0J5Q6M9_ASPFM	http://amigo.geneontology.org/cgi-bin/amigo/term_details?term=GO:0051983
transport	Gene Ontology	GO:0006810	16	858	0.00601483	0.0729038	tr|A0A0J5PTR2|A0A0J5PTR2_ASPFM|tr|A0A0J5Q2G5|A0A0J5Q2G5_ASPFM|tr|A0A0J5PQE4|A0A0J5PQE4_ASPFM|tr|A0A0J5PH08|A0A0J5PH08_ASPFM|tr|A0A0J5PHI4|A0A0J5PHI4_ASPFM|tr|A0A0J5PN06|A0A0J5PN06_ASPFM|tr|A0A0J5PKZ7|A0A0J5PKZ7_ASPFM|tr|A0A0J5PQL3|A0A0J5PQL3_ASPFM|tr|A0A0J5PZF9|A0A0J5PZF9_ASPFM|tr|A0A0J5SQG5|A0A0J5SQG5_ASPFM|tr|A0A0J5PV51|A0A0J5PV51_ASPFM|tr|A0A0J5Q4T5|A0A0J5Q4T5_ASPFM|tr|A0A0J5PVS4|A0A0J5PVS4_AS…	http://amigo.geneontology.org/cgi-bin/amigo/term_details?term=GO:0006810
translation	Gene Ontology	GO:0006412	6	172	0.00606221	0.0729038	tr|A0A0J5Q4L0|A0A0J5Q4L0_ASPFM|tr|A0A0J5PKY1|A0A0J5PKY1_ASPFM|tr|A0A0J5PNA9|A0A0J5PNA9_ASPFM|tr|A0A0J5Q0I9|A0A0J5Q0I9_ASPFM|tr|A0A0J5PI11|A0A0J5PI11_ASPFM|tr|A0A0J5PIQ5|A0A0J5PIQ5_ASPFM	http://amigo.geneontology.org/cgi-bin/amigo/term_details?term=GO:0006412
mitochondrial envelope	Gene Ontology	GO:0005740	6	172	0.00606221	0.0729038	tr|A0A0J5Q5A4|A0A0J5Q5A4_ASPFM|tr|A0A0J5PV51|A0A0J5PV51_ASPFM|tr|A0A0J5Q0U9|A0A0J5Q0U9_ASPFM|tr|A0A0J5PQL3|A0A0J5PQL3_ASPFM|tr|A0A0J5Q3U7|A0A0J5Q3U7_ASPFM|tr|A0A0J5Q1B9|A0A0J5Q1B9_ASPFM	http://amigo.geneontology.org/cgi-bin/amigo/term_details?term=GO:0005740
nuclear envelope	Gene Ontology	GO:0005635	4	75	0.00608871	0.0729038	tr|A0A0J5PKZ7|A0A0J5PKZ7_ASPFM|tr|A0A0J5Q1L6|A0A0J5Q1L6_ASPFM|tr|A0A0J5PVE5|A0A0J5PVE5_ASPFM|tr|A0A0J5PH08|A0A0J5PH08_ASPFM	http://amigo.geneontology.org/cgi-bin/amigo/term_details?term=GO:0005635
peroxisomal importomer complex	Gene Ontology	GO:1990429	2	11	0.00618887	0.0729038	tr|A0A0J5PKZ7|A0A0J5PKZ7_ASPFM|tr|A0A0J5Q0U9|A0A0J5Q0U9_ASPFM	http://amigo.geneontology.org/cgi-bin/amigo/term_details?term=GO:1990429
Pex17p-Pex14p docking complex	Gene Ontology	GO:1990415	2	11	0.00618887	0.0729038	tr|A0A0J5PKZ7|A0A0J5PKZ7_ASPFM|tr|A0A0J5Q0U9|A0A0J5Q0U9_ASPFM	http://amigo.geneontology.org/cgi-bin/amigo/term_details?term=GO:1990415
spitzenkorper	Gene Ontology	GO:0031521	2	11	0.00618887	0.0729038	tr|A0A0J5PRS9|A0A0J5PRS9_ASPFM|tr|A0A0J5PV51|A0A0J5PV51_ASPFM	http://amigo.geneontology.org/cgi-bin/amigo/term_details?term=GO:0031521
protein secretion	Gene Ontology	GO:0009306	2	11	0.00618887	0.0729038	tr|A0A0J5PRS9|A0A0J5PRS9_ASPFM|tr|A0A0J5PV51|A0A0J5PV51_ASPFM	http://amigo.geneontology.org/cgi-bin/amigo/term_details?term=GO:0009306
protein modification by small protein conjugation or removal	Gene Ontology	GO:0070647	4	76	0.00636458	0.074292	tr|A0A0J5Q1L6|A0A0J5Q1L6_ASPFM|tr|A0A0J5PVE5|A0A0J5PVE5_ASPFM|tr|A0A0J5PMP0|A0A0J5PMP0_ASPFM|tr|A0A0J5PDH8|A0A0J5PDH8_ASPFM	http://amigo.geneontology.org/cgi-bin/amigo/term_details?term=GO:0070647
negative regulation of cell cycle process	Gene Ontology	GO:0010948	4	77	0.00664864	0.0743176	tr|A0A0J5PV51|A0A0J5PV51_ASPFM|tr|A0A0J5PMP0|A0A0J5PMP0_ASPFM|tr|A0A0J5Q1I3|A0A0J5Q1I3_ASPFM|tr|A0A0J5PUK7|A0A0J5PUK7_ASPFM	http://amigo.geneontology.org/cgi-bin/amigo/term_details?term=GO:0010948
GTP binding	Gene Ontology	GO:0005525	4	77	0.00664864	0.0743176	tr|A0A0J5PRS9|A0A0J5PRS9_ASPFM|tr|A0A0J5PV51|A0A0J5PV51_ASPFM|tr|A0A0J5SQG5|A0A0J5SQG5_ASPFM|tr|A0A0J5STT4|A0A0J5STT4_ASPFM	http://amigo.geneontology.org/cgi-bin/amigo/term_details?term=GO:0005525
cellular response to heat	Gene Ontology	GO:0034605	3	39	0.00679043	0.0743176	tr|A0A0J5PMP0|A0A0J5PMP0_ASPFM|tr|A0A0J5SQG5|A0A0J5SQG5_ASPFM|tr|A0A0J5PHI4|A0A0J5PHI4_ASPFM	http://amigo.geneontology.org/cgi-bin/amigo/term_details?term=GO:0034605
growth of unicellular organism as a thread of attached cells	Gene Ontology	GO:0070783	3	39	0.00679043	0.0743176	tr|A0A0J5PMP0|A0A0J5PMP0_ASPFM|tr|A0A0J5SQG5|A0A0J5SQG5_ASPFM|tr|A0A0J5PHI4|A0A0J5PHI4_ASPFM	http://amigo.geneontology.org/cgi-bin/amigo/term_details?term=GO:0070783
filamentous growth of a population of unicellular organisms in response to biotic stimulus	Gene Ontology	GO:0036180	4	78	0.00694099	0.0743176	tr|A0A0J5PNA9|A0A0J5PNA9_ASPFM|tr|A0A0J5PMP0|A0A0J5PMP0_ASPFM|tr|A0A0J5SQG5|A0A0J5SQG5_ASPFM|tr|A0A0J5PHI4|A0A0J5PHI4_ASPFM	http://amigo.geneontology.org/cgi-bin/amigo/term_details?term=GO:0036180
guanyl ribonucleotide binding	Gene Ontology	GO:0032561	4	78	0.00694099	0.0743176	tr|A0A0J5PRS9|A0A0J5PRS9_ASPFM|tr|A0A0J5PV51|A0A0J5PV51_ASPFM|tr|A0A0J5SQG5|A0A0J5SQG5_ASPFM|tr|A0A0J5STT4|A0A0J5STT4_ASPFM	http://amigo.geneontology.org/cgi-bin/amigo/term_details?term=GO:0032561
guanyl nucleotide binding	Gene Ontology	GO:0019001	4	78	0.00694099	0.0743176	tr|A0A0J5PRS9|A0A0J5PRS9_ASPFM|tr|A0A0J5PV51|A0A0J5PV51_ASPFM|tr|A0A0J5SQG5|A0A0J5SQG5_ASPFM|tr|A0A0J5STT4|A0A0J5STT4_ASPFM	http://amigo.geneontology.org/cgi-bin/amigo/term_details?term=GO:0019001
positive regulation of biological process	Gene Ontology	GO:0048518	8	296	0.00701719	0.0743176	tr|A0A0J5SKW5|A0A0J5SKW5_ASPFM|tr|A0A0J5Q6M9|A0A0J5Q6M9_ASPFM|tr|A0A0J5PHI4|A0A0J5PHI4_ASPFM|tr|A0A0J5PVE5|A0A0J5PVE5_ASPFM|tr|A0A0J5SQG5|A0A0J5SQG5_ASPFM|tr|A0A0J5PUB3|A0A0J5PUB3_ASPFM|tr|A0A0J5PMP0|A0A0J5PMP0_ASPFM|tr|A0A0J5PIQ5|A0A0J5PIQ5_ASPFM	http://amigo.geneontology.org/cgi-bin/amigo/term_details?term=GO:0048518
positive regulation of filamentous growth of a population of unicellular organisms in response to biotic stimulus	Gene Ontology	GO:1900445	2	12	0.00717709	0.0743176	tr|A0A0J5PMP0|A0A0J5PMP0_ASPFM|tr|A0A0J5SQG5|A0A0J5SQG5_ASPFM	http://amigo.geneontology.org/cgi-bin/amigo/term_details?term=GO:1900445
positive regulation of response to biotic stimulus	Gene Ontology	GO:0002833	2	12	0.00717709	0.0743176	tr|A0A0J5PMP0|A0A0J5PMP0_ASPFM|tr|A0A0J5SQG5|A0A0J5SQG5_ASPFM	http://amigo.geneontology.org/cgi-bin/amigo/term_details?term=GO:0002833
proteasome accessory complex	Gene Ontology	GO:0022624	2	12	0.00717709	0.0743176	tr|A0A0J5PVE5|A0A0J5PVE5_ASPFM|tr|A0A0J5Q6M9|A0A0J5Q6M9_ASPFM	http://amigo.geneontology.org/cgi-bin/amigo/term_details?term=GO:0022624
proteasome regulatory particle	Gene Ontology	GO:0005838	2	12	0.00717709	0.0743176	tr|A0A0J5PVE5|A0A0J5PVE5_ASPFM|tr|A0A0J5Q6M9|A0A0J5Q6M9_ASPFM	http://amigo.geneontology.org/cgi-bin/amigo/term_details?term=GO:0005838
eukaryotic 43S preinitiation complex	Gene Ontology	GO:0016282	2	12	0.00717709	0.0743176	tr|A0A0J5PUB3|A0A0J5PUB3_ASPFM|tr|A0A0J5PI11|A0A0J5PI11_ASPFM	http://amigo.geneontology.org/cgi-bin/amigo/term_details?term=GO:0016282
eukaryotic translation initiation factor 3 complex	Gene Ontology	GO:0005852	2	12	0.00717709	0.0743176	tr|A0A0J5PUB3|A0A0J5PUB3_ASPFM|tr|A0A0J5PI11|A0A0J5PI11_ASPFM	http://amigo.geneontology.org/cgi-bin/amigo/term_details?term=GO:0005852
establishment of localization	Gene Ontology	GO:0051234	16	877	0.00736944	0.0756989	tr|A0A0J5PTR2|A0A0J5PTR2_ASPFM|tr|A0A0J5Q2G5|A0A0J5Q2G5_ASPFM|tr|A0A0J5PQE4|A0A0J5PQE4_ASPFM|tr|A0A0J5PH08|A0A0J5PH08_ASPFM|tr|A0A0J5PHI4|A0A0J5PHI4_ASPFM|tr|A0A0J5PN06|A0A0J5PN06_ASPFM|tr|A0A0J5PKZ7|A0A0J5PKZ7_ASPFM|tr|A0A0J5PQL3|A0A0J5PQL3_ASPFM|tr|A0A0J5PZF9|A0A0J5PZF9_ASPFM|tr|A0A0J5SQG5|A0A0J5SQG5_ASPFM|tr|A0A0J5PV51|A0A0J5PV51_ASPFM|tr|A0A0J5Q4T5|A0A0J5Q4T5_ASPFM|tr|A0A0J5PVS4|A0A0J5PVS4_AS…	http://amigo.geneontology.org/cgi-bin/amigo/term_details?term=GO:0051234
cellular response to biotic stimulus	Gene Ontology	GO:0071216	4	80	0.00755098	0.0769481	tr|A0A0J5PNA9|A0A0J5PNA9_ASPFM|tr|A0A0J5PMP0|A0A0J5PMP0_ASPFM|tr|A0A0J5SQG5|A0A0J5SQG5_ASPFM|tr|A0A0J5PHI4|A0A0J5PHI4_ASPFM	http://amigo.geneontology.org/cgi-bin/amigo/term_details?term=GO:0071216
nuclear periphery	Gene Ontology	GO:0034399	3	42	0.00822802	0.0806831	tr|A0A0J5PKZ7|A0A0J5PKZ7_ASPFM|tr|A0A0J5PVE5|A0A0J5PVE5_ASPFM|tr|A0A0J5PH08|A0A0J5PH08_ASPFM	http://amigo.geneontology.org/cgi-bin/amigo/term_details?term=GO:0034399
positive regulation of chromosome segregation	Gene Ontology	GO:0051984	2	13	0.00823168	0.0806831	tr|A0A0J5PVE5|A0A0J5PVE5_ASPFM|tr|A0A0J5Q6M9|A0A0J5Q6M9_ASPFM	http://amigo.geneontology.org/cgi-bin/amigo/term_details?term=GO:0051984
translation preinitiation complex	Gene Ontology	GO:0070993	2	13	0.00823168	0.0806831	tr|A0A0J5PUB3|A0A0J5PUB3_ASPFM|tr|A0A0J5PI11|A0A0J5PI11_ASPFM	http://amigo.geneontology.org/cgi-bin/amigo/term_details?term=GO:0070993
cytosolic proteasome complex	Gene Ontology	GO:0031597	2	13	0.00823168	0.0806831	tr|A0A0J5Q2W2|A0A0J5Q2W2_ASPFM|tr|A0A0J5PVE5|A0A0J5PVE5_ASPFM	http://amigo.geneontology.org/cgi-bin/amigo/term_details?term=GO:0031597
proteasome storage granule	Gene Ontology	GO:0034515	2	13	0.00823168	0.0806831	tr|A0A0J5Q2W2|A0A0J5Q2W2_ASPFM|tr|A0A0J5PVE5|A0A0J5PVE5_ASPFM	http://amigo.geneontology.org/cgi-bin/amigo/term_details?term=GO:0034515
cellular component organization	Gene Ontology	GO:0016043	15	812	0.00853099	0.0829833	tr|A0A0J5PV51|A0A0J5PV51_ASPFM|tr|A0A0J5Q5A4|A0A0J5Q5A4_ASPFM|tr|A0A0J5Q6M9|A0A0J5Q6M9_ASPFM|tr|A0A0J5PEJ8|A0A0J5PEJ8_ASPFM|tr|A0A0J5PKZ7|A0A0J5PKZ7_ASPFM|tr|A0A0J5Q0U9|A0A0J5Q0U9_ASPFM|tr|A0A0J5PVE5|A0A0J5PVE5_ASPFM|tr|A0A0J5SQG5|A0A0J5SQG5_ASPFM|tr|A0A0J5PUB3|A0A0J5PUB3_ASPFM|tr|A0A0J5Q2W2|A0A0J5Q2W2_ASPFM|tr|A0A0J5Q1B9|A0A0J5Q1B9_ASPFM|tr|A0A0J5PRS9|A0A0J5PRS9_ASPFM|tr|A0A0J5PMP0|A0A0J5PMP0_AS…	http://amigo.geneontology.org/cgi-bin/amigo/term_details?term=GO:0016043
regulation of filamentous growth of a population of unicellular organisms	Gene Ontology	GO:1900428	3	43	0.00874392	0.083785	tr|A0A0J5PMP0|A0A0J5PMP0_ASPFM|tr|A0A0J5SQG5|A0A0J5SQG5_ASPFM|tr|A0A0J5PHI4|A0A0J5PHI4_ASPFM	http://amigo.geneontology.org/cgi-bin/amigo/term_details?term=GO:1900428
protein ubiquitination	Gene Ontology	GO:0016567	3	43	0.00874392	0.083785	tr|A0A0J5Q1L6|A0A0J5Q1L6_ASPFM|tr|A0A0J5PMP0|A0A0J5PMP0_ASPFM|tr|A0A0J5PDH8|A0A0J5PDH8_ASPFM	http://amigo.geneontology.org/cgi-bin/amigo/term_details?term=GO:0016567
preribosome	Gene Ontology	GO:0030684	4	84	0.00887481	0.0844093	tr|A0A0J5PNA9|A0A0J5PNA9_ASPFM|tr|A0A0J5PNE9|A0A0J5PNE9_ASPFM|tr|A0A0J5Q0I9|A0A0J5Q0I9_ASPFM|tr|A0A0J5PKY1|A0A0J5PKY1_ASPFM	http://amigo.geneontology.org/cgi-bin/amigo/term_details?term=GO:0030684
regulation of catalytic activity	Gene Ontology	GO:0050790	4	85	0.00922796	0.085157	tr|A0A0J5PKZ7|A0A0J5PKZ7_ASPFM|tr|A0A0J5SKW5|A0A0J5SKW5_ASPFM|tr|A0A0J5PMP0|A0A0J5PMP0_ASPFM|tr|A0A0J5SQG5|A0A0J5SQG5_ASPFM	http://amigo.geneontology.org/cgi-bin/amigo/term_details?term=GO:0050790
phospholipid binding	Gene Ontology	GO:0005543	3	44	0.00927842	0.085157	tr|A0A0J5Q166|A0A0J5Q166_ASPFM|tr|A0A0J5PMM3|A0A0J5PMM3_ASPFM|tr|A0A0J5PIQ5|A0A0J5PIQ5_ASPFM	http://amigo.geneontology.org/cgi-bin/amigo/term_details?term=GO:0005543
carboxylic acid binding	Gene Ontology	GO:0031406	2	14	0.00935135	0.085157	tr|A0A0J5PMP0|A0A0J5PMP0_ASPFM|tr|A0A0J5SCF2|A0A0J5SCF2_ASPFM	http://amigo.geneontology.org/cgi-bin/amigo/term_details?term=GO:0031406
positive regulation of mitotic nuclear division	Gene Ontology	GO:0045840	2	14	0.00935135	0.085157	tr|A0A0J5PVE5|A0A0J5PVE5_ASPFM|tr|A0A0J5Q6M9|A0A0J5Q6M9_ASPFM	http://amigo.geneontology.org/cgi-bin/amigo/term_details?term=GO:0045840
terpenoid biosynthetic process	Gene Ontology	GO:0016114	2	14	0.00935135	0.085157	tr|A0A0J5PUK7|A0A0J5PUK7_ASPFM|tr|A0A0J5Q6L6|A0A0J5Q6L6_ASPFM	http://amigo.geneontology.org/cgi-bin/amigo/term_details?term=GO:0016114
induction of conjugation with cellular fusion	Gene Ontology	GO:0010514	2	14	0.00935135	0.085157	tr|A0A0J5PMP0|A0A0J5PMP0_ASPFM|tr|A0A0J5SQG5|A0A0J5SQG5_ASPFM	http://amigo.geneontology.org/cgi-bin/amigo/term_details?term=GO:0010514
positive regulation of catalytic activity	Gene Ontology	GO:0043085	3	45	0.00983165	0.0889003	tr|A0A0J5PKZ7|A0A0J5PKZ7_ASPFM|tr|A0A0J5SKW5|A0A0J5SKW5_ASPFM|tr|A0A0J5SQG5|A0A0J5SQG5_ASPFM	http://amigo.geneontology.org/cgi-bin/amigo/term_details?term=GO:0043085
organelle organization	Gene Ontology	GO:0006996	12	596	0.00997529	0.0895683	tr|A0A0J5PV51|A0A0J5PV51_ASPFM|tr|A0A0J5Q5A4|A0A0J5Q5A4_ASPFM|tr|A0A0J5Q6M9|A0A0J5Q6M9_ASPFM|tr|A0A0J5PEJ8|A0A0J5PEJ8_ASPFM|tr|A0A0J5PKZ7|A0A0J5PKZ7_ASPFM|tr|A0A0J5Q0U9|A0A0J5Q0U9_ASPFM|tr|A0A0J5SQG5|A0A0J5SQG5_ASPFM|tr|A0A0J5PVE5|A0A0J5PVE5_ASPFM|tr|A0A0J5PRS9|A0A0J5PRS9_ASPFM|tr|A0A0J5PMP0|A0A0J5PMP0_ASPFM|tr|A0A0J5PKY1|A0A0J5PKY1_ASPFM|tr|A0A0J5Q1B9|A0A0J5Q1B9_ASPFM	http://amigo.geneontology.org/cgi-bin/amigo/term_details?term=GO:0006996
single-organism cellular process	Gene Ontology	GO:0044763	25	1679	0.0102943	0.089581	tr|A0A0J5Q2W2|A0A0J5Q2W2_ASPFM|tr|A0A0J5PQL3|A0A0J5PQL3_ASPFM|tr|A0A0J5Q3U7|A0A0J5Q3U7_ASPFM|tr|A0A0J5PWF4|A0A0J5PWF4_ASPFM|tr|A0A0J5PEJ8|A0A0J5PEJ8_ASPFM|tr|A0A0J5PUK7|A0A0J5PUK7_ASPFM|tr|A0A0J5PKZ7|A0A0J5PKZ7_ASPFM|tr|A0A0J5PNA9|A0A0J5PNA9_ASPFM|tr|A0A0J5PRC9|A0A0J5PRC9_ASPFM|tr|A0A0J5Q5A4|A0A0J5Q5A4_ASPFM|tr|A0A0J5PHI4|A0A0J5PHI4_ASPFM|tr|A0A0J5SQG5|A0A0J5SQG5_ASPFM|tr|A0A0J5SCF2|A0A0J5SCF2_AS…	http://amigo.geneontology.org/cgi-bin/amigo/term_details?term=GO:0044763
positive regulation of cell cycle process	Gene Ontology	GO:0090068	3	46	0.0104037	0.089581	tr|A0A0J5PVE5|A0A0J5PVE5_ASPFM|tr|A0A0J5PMP0|A0A0J5PMP0_ASPFM|tr|A0A0J5Q6M9|A0A0J5Q6M9_ASPFM	http://amigo.geneontology.org/cgi-bin/amigo/term_details?term=GO:0090068
regulation of filamentous growth of a population of unicellular organisms in response to biotic stimulus	Gene Ontology	GO:1900443	2	15	0.0105348	0.089581	tr|A0A0J5PMP0|A0A0J5PMP0_ASPFM|tr|A0A0J5SQG5|A0A0J5SQG5_ASPFM	http://amigo.geneontology.org/cgi-bin/amigo/term_details?term=GO:1900443
regulation of response to biotic stimulus	Gene Ontology	GO:0002831	2	15	0.0105348	0.089581	tr|A0A0J5PMP0|A0A0J5PMP0_ASPFM|tr|A0A0J5SQG5|A0A0J5SQG5_ASPFM	http://amigo.geneontology.org/cgi-bin/amigo/term_details?term=GO:0002831
anion transmembrane transport	Gene Ontology	GO:0098656	2	15	0.0105348	0.089581	tr|A0A0J5PN06|A0A0J5PN06_ASPFM|tr|A0A0J5Q4T5|A0A0J5Q4T5_ASPFM	http://amigo.geneontology.org/cgi-bin/amigo/term_details?term=GO:0098656
cellular response to neutral pH	Gene Ontology	GO:0036244	2	15	0.0105348	0.089581	tr|A0A0J5PMP0|A0A0J5PMP0_ASPFM|tr|A0A0J5PHI4|A0A0J5PHI4_ASPFM	http://amigo.geneontology.org/cgi-bin/amigo/term_details?term=GO:0036244
terpenoid metabolic process	Gene Ontology	GO:0006721	2	15	0.0105348	0.089581	tr|A0A0J5PUK7|A0A0J5PUK7_ASPFM|tr|A0A0J5Q6L6|A0A0J5Q6L6_ASPFM	http://amigo.geneontology.org/cgi-bin/amigo/term_details?term=GO:0006721
positive regulation of nuclear division	Gene Ontology	GO:0051785	2	15	0.0105348	0.089581	tr|A0A0J5PVE5|A0A0J5PVE5_ASPFM|tr|A0A0J5Q6M9|A0A0J5Q6M9_ASPFM	http://amigo.geneontology.org/cgi-bin/amigo/term_details?term=GO:0051785
ubiquitin-dependent protein catabolic process	Gene Ontology	GO:0006511	4	89	0.010732	0.0900642	tr|A0A0J5PUB3|A0A0J5PUB3_ASPFM|tr|A0A0J5Q2W2|A0A0J5Q2W2_ASPFM|tr|A0A0J5PVE5|A0A0J5PVE5_ASPFM|tr|A0A0J5PDH8|A0A0J5PDH8_ASPFM	http://amigo.geneontology.org/cgi-bin/amigo/term_details?term=GO:0006511
modification-dependent protein catabolic process	Gene Ontology	GO:0019941	4	89	0.010732	0.0900642	tr|A0A0J5PUB3|A0A0J5PUB3_ASPFM|tr|A0A0J5Q2W2|A0A0J5Q2W2_ASPFM|tr|A0A0J5PVE5|A0A0J5PVE5_ASPFM|tr|A0A0J5PDH8|A0A0J5PDH8_ASPFM	http://amigo.geneontology.org/cgi-bin/amigo/term_details?term=GO:0019941
positive regulation of cellular process	Gene Ontology	GO:0048522	7	257	0.0110777	0.0923622	tr|A0A0J5SKW5|A0A0J5SKW5_ASPFM|tr|A0A0J5Q6M9|A0A0J5Q6M9_ASPFM|tr|A0A0J5PVE5|A0A0J5PVE5_ASPFM|tr|A0A0J5SQG5|A0A0J5SQG5_ASPFM|tr|A0A0J5PUB3|A0A0J5PUB3_ASPFM|tr|A0A0J5PMP0|A0A0J5PMP0_ASPFM|tr|A0A0J5PIQ5|A0A0J5PIQ5_ASPFM	http://amigo.geneontology.org/cgi-bin/amigo/term_details?term=GO:0048522
mitochondrial part	Gene Ontology	GO:0044429	7	258	0.0112944	0.0935618	tr|A0A0J5Q5A4|A0A0J5Q5A4_ASPFM|tr|A0A0J5PV51|A0A0J5PV51_ASPFM|tr|A0A0J5Q0U9|A0A0J5Q0U9_ASPFM|tr|A0A0J5PQL3|A0A0J5PQL3_ASPFM|tr|A0A0J5SCF2|A0A0J5SCF2_ASPFM|tr|A0A0J5Q3U7|A0A0J5Q3U7_ASPFM|tr|A0A0J5Q1B9|A0A0J5Q1B9_ASPFM	http://amigo.geneontology.org/cgi-bin/amigo/term_details?term=GO:0044429
mitochondrial inner membrane	Gene Ontology	GO:0005743	4	91	0.01154	0.0941869	tr|A0A0J5Q3U7|A0A0J5Q3U7_ASPFM|tr|A0A0J5Q5A4|A0A0J5Q5A4_ASPFM|tr|A0A0J5PQL3|A0A0J5PQL3_ASPFM|tr|A0A0J5Q0U9|A0A0J5Q0U9_ASPFM	http://amigo.geneontology.org/cgi-bin/amigo/term_details?term=GO:0005743
positive regulation of mitotic cell cycle phase transition	Gene Ontology	GO:1901992	2	16	0.0117809	0.0941869	tr|A0A0J5PVE5|A0A0J5PVE5_ASPFM|tr|A0A0J5Q6M9|A0A0J5Q6M9_ASPFM	http://amigo.geneontology.org/cgi-bin/amigo/term_details?term=GO:1901992
filamentous growth of a population of unicellular organisms in response to neutral pH	Gene Ontology	GO:0036178	2	16	0.0117809	0.0941869	tr|A0A0J5PMP0|A0A0J5PMP0_ASPFM|tr|A0A0J5PHI4|A0A0J5PHI4_ASPFM	http://amigo.geneontology.org/cgi-bin/amigo/term_details?term=GO:0036178
positive regulation of cell cycle phase transition	Gene Ontology	GO:1901989	2	16	0.0117809	0.0941869	tr|A0A0J5PVE5|A0A0J5PVE5_ASPFM|tr|A0A0J5Q6M9|A0A0J5Q6M9_ASPFM	http://amigo.geneontology.org/cgi-bin/amigo/term_details?term=GO:1901989
regulation of growth of unicellular organism as a thread of attached cells	Gene Ontology	GO:0070784	2	16	0.0117809	0.0941869	tr|A0A0J5SQG5|A0A0J5SQG5_ASPFM|tr|A0A0J5PHI4|A0A0J5PHI4_ASPFM	http://amigo.geneontology.org/cgi-bin/amigo/term_details?term=GO:0070784
organelle membrane	Gene Ontology	GO:0031090	8	325	0.01181	0.0941869	tr|A0A0J5Q5A4|A0A0J5Q5A4_ASPFM|tr|A0A0J5PV51|A0A0J5PV51_ASPFM|tr|A0A0J5PQL3|A0A0J5PQL3_ASPFM|tr|A0A0J5Q0U9|A0A0J5Q0U9_ASPFM|tr|A0A0J5PN06|A0A0J5PN06_ASPFM|tr|A0A0J5Q3U7|A0A0J5Q3U7_ASPFM|tr|A0A0J5PZF9|A0A0J5PZF9_ASPFM|tr|A0A0J5Q1B9|A0A0J5Q1B9_ASPFM	http://amigo.geneontology.org/cgi-bin/amigo/term_details?term=GO:0031090
molecular function regulator	Gene Ontology	GO:0098772	4	92	0.0119583	0.0947807	tr|A0A0J5PMP0|A0A0J5PMP0_ASPFM|tr|A0A0J5SKW5|A0A0J5SKW5_ASPFM|tr|A0A0J5PVS4|A0A0J5PVS4_ASPFM|tr|A0A0J5PIQ5|A0A0J5PIQ5_ASPFM	http://amigo.geneontology.org/cgi-bin/amigo/term_details?term=GO:0098772
regulation of filamentous growth	Gene Ontology	GO:0010570	3	49	0.0122343	0.0957859	tr|A0A0J5PMP0|A0A0J5PMP0_ASPFM|tr|A0A0J5SQG5|A0A0J5SQG5_ASPFM|tr|A0A0J5PHI4|A0A0J5PHI4_ASPFM	http://amigo.geneontology.org/cgi-bin/amigo/term_details?term=GO:0010570
response to heat	Gene Ontology	GO:0009408	3	49	0.0122343	0.0957859	tr|A0A0J5PMP0|A0A0J5PMP0_ASPFM|tr|A0A0J5SQG5|A0A0J5SQG5_ASPFM|tr|A0A0J5PHI4|A0A0J5PHI4_ASPFM	http://amigo.geneontology.org/cgi-bin/amigo/term_details?term=GO:0009408
regulation of mitotic cell cycle	Gene Ontology	GO:0007346	4	94	0.0128239	0.0996935	tr|A0A0J5PVE5|A0A0J5PVE5_ASPFM|tr|A0A0J5PMP0|A0A0J5PMP0_ASPFM|tr|A0A0J5SQG5|A0A0J5SQG5_ASPFM|tr|A0A0J5Q6M9|A0A0J5Q6M9_ASPFM	http://amigo.geneontology.org/cgi-bin/amigo/term_details?term=GO:0007346
cellular macromolecule catabolic process	Gene Ontology	GO:0044265	5	146	0.0129324	0.0996935	tr|A0A0J5PUB3|A0A0J5PUB3_ASPFM|tr|A0A0J5Q2W2|A0A0J5Q2W2_ASPFM|tr|A0A0J5PVE5|A0A0J5PVE5_ASPFM|tr|A0A0J5PDH8|A0A0J5PDH8_ASPFM|tr|A0A0J5SKW5|A0A0J5SKW5_ASPFM	http://amigo.geneontology.org/cgi-bin/amigo/term_details?term=GO:0044265
regulation of proteolysis	Gene Ontology	GO:0030162	2	17	0.0130883	0.0996935	tr|A0A0J5PUB3|A0A0J5PUB3_ASPFM|tr|A0A0J5Q0U9|A0A0J5Q0U9_ASPFM	http://amigo.geneontology.org/cgi-bin/amigo/term_details?term=GO:0030162
response to neutral pH	Gene Ontology	GO:0036176	2	17	0.0130883	0.0996935	tr|A0A0J5PMP0|A0A0J5PMP0_ASPFM|tr|A0A0J5PHI4|A0A0J5PHI4_ASPFM	http://amigo.geneontology.org/cgi-bin/amigo/term_details?term=GO:0036176
organelle inner membrane	Gene Ontology	GO:0019866	4	95	0.0132714	0.0996935	tr|A0A0J5Q3U7|A0A0J5Q3U7_ASPFM|tr|A0A0J5Q5A4|A0A0J5Q5A4_ASPFM|tr|A0A0J5PQL3|A0A0J5PQL3_ASPFM|tr|A0A0J5Q0U9|A0A0J5Q0U9_ASPFM	http://amigo.geneontology.org/cgi-bin/amigo/term_details?term=GO:0019866
organelle fission	Gene Ontology	GO:0048285	5	147	0.0132769	0.0996935	tr|A0A0J5PVE5|A0A0J5PVE5_ASPFM|tr|A0A0J5PMP0|A0A0J5PMP0_ASPFM|tr|A0A0J5SQG5|A0A0J5SQG5_ASPFM|tr|A0A0J5Q1B9|A0A0J5Q1B9_ASPFM|tr|A0A0J5Q6M9|A0A0J5Q6M9_ASPFM	http://amigo.geneontology.org/cgi-bin/amigo/term_details?term=GO:0048285
positive regulation of cell cycle	Gene Ontology	GO:0045787	3	51	0.013551	0.100575	tr|A0A0J5PVE5|A0A0J5PVE5_ASPFM|tr|A0A0J5PMP0|A0A0J5PMP0_ASPFM|tr|A0A0J5Q6M9|A0A0J5Q6M9_ASPFM	http://amigo.geneontology.org/cgi-bin/amigo/term_details?term=GO:0045787
lipid binding	Gene Ontology	GO:0008289	3	51	0.013551	0.100575	tr|A0A0J5Q166|A0A0J5Q166_ASPFM|tr|A0A0J5PMM3|A0A0J5PMM3_ASPFM|tr|A0A0J5PIQ5|A0A0J5PIQ5_ASPFM	http://amigo.geneontology.org/cgi-bin/amigo/term_details?term=GO:0008289
mitotic nuclear division	Gene Ontology	GO:0007067	4	96	0.0137287	0.101308	tr|A0A0J5PVE5|A0A0J5PVE5_ASPFM|tr|A0A0J5PMP0|A0A0J5PMP0_ASPFM|tr|A0A0J5SQG5|A0A0J5SQG5_ASPFM|tr|A0A0J5Q6M9|A0A0J5Q6M9_ASPFM	http://amigo.geneontology.org/cgi-bin/amigo/term_details?term=GO:0007067
modification-dependent macromolecule catabolic process	Gene Ontology	GO:0043632	4	97	0.0141959	0.102709	tr|A0A0J5PUB3|A0A0J5PUB3_ASPFM|tr|A0A0J5Q2W2|A0A0J5Q2W2_ASPFM|tr|A0A0J5PVE5|A0A0J5PVE5_ASPFM|tr|A0A0J5PDH8|A0A0J5PDH8_ASPFM	http://amigo.geneontology.org/cgi-bin/amigo/term_details?term=GO:0043632
ribosomal subunit	Gene Ontology	GO:0044391	4	97	0.0141959	0.102709	tr|A0A0J5PNA9|A0A0J5PNA9_ASPFM|tr|A0A0J5Q0I9|A0A0J5Q0I9_ASPFM|tr|A0A0J5PKY1|A0A0J5PKY1_ASPFM|tr|A0A0J5Q4L0|A0A0J5Q4L0_ASPFM	http://amigo.geneontology.org/cgi-bin/amigo/term_details?term=GO:0044391
positive regulation of molecular function	Gene Ontology	GO:0044093	3	52	0.0142384	0.102709	tr|A0A0J5PKZ7|A0A0J5PKZ7_ASPFM|tr|A0A0J5SKW5|A0A0J5SKW5_ASPFM|tr|A0A0J5SQG5|A0A0J5SQG5_ASPFM	http://amigo.geneontology.org/cgi-bin/amigo/term_details?term=GO:0044093
proteasome-mediated ubiquitin-dependent protein catabolic process	Gene Ontology	GO:0043161	3	52	0.0142384	0.102709	tr|A0A0J5PUB3|A0A0J5PUB3_ASPFM|tr|A0A0J5Q2W2|A0A0J5Q2W2_ASPFM|tr|A0A0J5PVE5|A0A0J5PVE5_ASPFM	http://amigo.geneontology.org/cgi-bin/amigo/term_details?term=GO:0043161
apoptotic process	Gene Ontology	GO:0006915	2	18	0.0144558	0.103118	tr|A0A0J5PMP0|A0A0J5PMP0_ASPFM|tr|A0A0J5SQG5|A0A0J5SQG5_ASPFM	http://amigo.geneontology.org/cgi-bin/amigo/term_details?term=GO:0006915
filamentous growth of a population of unicellular organisms in response to pH	Gene Ontology	GO:0036177	2	18	0.0144558	0.103118	tr|A0A0J5PMP0|A0A0J5PMP0_ASPFM|tr|A0A0J5PHI4|A0A0J5PHI4_ASPFM	http://amigo.geneontology.org/cgi-bin/amigo/term_details?term=GO:0036177
regulation of molecular function	Gene Ontology	GO:0065009	4	98	0.0146732	0.10409	tr|A0A0J5PKZ7|A0A0J5PKZ7_ASPFM|tr|A0A0J5SKW5|A0A0J5SKW5_ASPFM|tr|A0A0J5PMP0|A0A0J5PMP0_ASPFM|tr|A0A0J5SQG5|A0A0J5SQG5_ASPFM	http://amigo.geneontology.org/cgi-bin/amigo/term_details?term=GO:0065009
proteasomal protein catabolic process	Gene Ontology	GO:0010498	3	53	0.0149454	0.105439	tr|A0A0J5PUB3|A0A0J5PUB3_ASPFM|tr|A0A0J5Q2W2|A0A0J5Q2W2_ASPFM|tr|A0A0J5PVE5|A0A0J5PVE5_ASPFM	http://amigo.geneontology.org/cgi-bin/amigo/term_details?term=GO:0010498
organophosphate metabolic process	Gene Ontology	GO:0019637	6	212	0.0155172	0.108472	tr|A0A0J5PWF4|A0A0J5PWF4_ASPFM|tr|A0A0J5Q6L6|A0A0J5Q6L6_ASPFM|tr|A0A0J5PUK7|A0A0J5PUK7_ASPFM|tr|A0A0J5SQG5|A0A0J5SQG5_ASPFM|tr|A0A0J5PQL3|A0A0J5PQL3_ASPFM|tr|A0A0J5PRC9|A0A0J5PRC9_ASPFM	http://amigo.geneontology.org/cgi-bin/amigo/term_details?term=GO:0019637
structural constituent of ribosome	Gene Ontology	GO:0003735	4	100	0.0156579	0.108472	tr|A0A0J5PNA9|A0A0J5PNA9_ASPFM|tr|A0A0J5Q0I9|A0A0J5Q0I9_ASPFM|tr|A0A0J5PKY1|A0A0J5PKY1_ASPFM|tr|A0A0J5Q4L0|A0A0J5Q4L0_ASPFM	http://amigo.geneontology.org/cgi-bin/amigo/term_details?term=GO:0003735
protein modification by small protein conjugation	Gene Ontology	GO:0032446	3	54	0.015672	0.108472	tr|A0A0J5Q1L6|A0A0J5Q1L6_ASPFM|tr|A0A0J5PMP0|A0A0J5PMP0_ASPFM|tr|A0A0J5PDH8|A0A0J5PDH8_ASPFM	http://amigo.geneontology.org/cgi-bin/amigo/term_details?term=GO:0032446
translational elongation	Gene Ontology	GO:0006414	2	19	0.0158822	0.108472	tr|A0A0J5PKY1|A0A0J5PKY1_ASPFM|tr|A0A0J5PIQ5|A0A0J5PIQ5_ASPFM	http://amigo.geneontology.org/cgi-bin/amigo/term_details?term=GO:0006414
transporter complex	Gene Ontology	GO:1990351	2	19	0.0158822	0.108472	tr|A0A0J5PKZ7|A0A0J5PKZ7_ASPFM|tr|A0A0J5Q0U9|A0A0J5Q0U9_ASPFM	http://amigo.geneontology.org/cgi-bin/amigo/term_details?term=GO:1990351
pseudohyphal growth	Gene Ontology	GO:0007124	2	19	0.0158822	0.108472	tr|A0A0J5PMP0|A0A0J5PMP0_ASPFM|tr|A0A0J5SQG5|A0A0J5SQG5_ASPFM	http://amigo.geneontology.org/cgi-bin/amigo/term_details?term=GO:0007124
cell cycle process	Gene Ontology	GO:0022402	8	344	0.0160524	0.109054	tr|A0A0J5PV51|A0A0J5PV51_ASPFM|tr|A0A0J5PUK7|A0A0J5PUK7_ASPFM|tr|A0A0J5Q6M9|A0A0J5Q6M9_ASPFM|tr|A0A0J5PKZ7|A0A0J5PKZ7_ASPFM|tr|A0A0J5Q1I3|A0A0J5Q1I3_ASPFM|tr|A0A0J5SQG5|A0A0J5SQG5_ASPFM|tr|A0A0J5PVE5|A0A0J5PVE5_ASPFM|tr|A0A0J5PMP0|A0A0J5PMP0_ASPFM	http://amigo.geneontology.org/cgi-bin/amigo/term_details?term=GO:0022402
peptide biosynthetic process	Gene Ontology	GO:0043043	6	216	0.0168302	0.112618	tr|A0A0J5Q4L0|A0A0J5Q4L0_ASPFM|tr|A0A0J5PKY1|A0A0J5PKY1_ASPFM|tr|A0A0J5PNA9|A0A0J5PNA9_ASPFM|tr|A0A0J5Q0I9|A0A0J5Q0I9_ASPFM|tr|A0A0J5PI11|A0A0J5PI11_ASPFM|tr|A0A0J5PIQ5|A0A0J5PIQ5_ASPFM	http://amigo.geneontology.org/cgi-bin/amigo/term_details?term=GO:0043043
single-organism transport	Gene Ontology	GO:0044765	7	280	0.0168825	0.112618	tr|A0A0J5Q2G5|A0A0J5Q2G5_ASPFM|tr|A0A0J5PHI4|A0A0J5PHI4_ASPFM|tr|A0A0J5PKZ7|A0A0J5PKZ7_ASPFM|tr|A0A0J5PQL3|A0A0J5PQL3_ASPFM|tr|A0A0J5PV51|A0A0J5PV51_ASPFM|tr|A0A0J5Q4T5|A0A0J5Q4T5_ASPFM|tr|A0A0J5PRS9|A0A0J5PRS9_ASPFM	http://amigo.geneontology.org/cgi-bin/amigo/term_details?term=GO:0044765
establishment of organelle localization	Gene Ontology	GO:0051656	3	56	0.0171841	0.112618	tr|A0A0J5PKZ7|A0A0J5PKZ7_ASPFM|tr|A0A0J5PRS9|A0A0J5PRS9_ASPFM|tr|A0A0J5SQG5|A0A0J5SQG5_ASPFM	http://amigo.geneontology.org/cgi-bin/amigo/term_details?term=GO:0051656
response to biotic stimulus	Gene Ontology	GO:0009607	4	103	0.0172116	0.112618	tr|A0A0J5PNA9|A0A0J5PNA9_ASPFM|tr|A0A0J5PMP0|A0A0J5PMP0_ASPFM|tr|A0A0J5SQG5|A0A0J5SQG5_ASPFM|tr|A0A0J5PHI4|A0A0J5PHI4_ASPFM	http://amigo.geneontology.org/cgi-bin/amigo/term_details?term=GO:0009607
proteolysis involved in cellular protein catabolic process	Gene Ontology	GO:0051603	4	103	0.0172116	0.112618	tr|A0A0J5PUB3|A0A0J5PUB3_ASPFM|tr|A0A0J5Q2W2|A0A0J5Q2W2_ASPFM|tr|A0A0J5PVE5|A0A0J5PVE5_ASPFM|tr|A0A0J5PDH8|A0A0J5PDH8_ASPFM	http://amigo.geneontology.org/cgi-bin/amigo/term_details?term=GO:0051603
positive regulation of signaling	Gene Ontology	GO:0023056	2	20	0.0173663	0.112618	tr|A0A0J5PMP0|A0A0J5PMP0_ASPFM|tr|A0A0J5SQG5|A0A0J5SQG5_ASPFM	http://amigo.geneontology.org/cgi-bin/amigo/term_details?term=GO:0023056
mitochondrial membrane organization	Gene Ontology	GO:0007006	2	20	0.0173663	0.112618	tr|A0A0J5Q5A4|A0A0J5Q5A4_ASPFM|tr|A0A0J5Q0U9|A0A0J5Q0U9_ASPFM	http://amigo.geneontology.org/cgi-bin/amigo/term_details?term=GO:0007006
positive regulation of signal transduction	Gene Ontology	GO:0009967	2	20	0.0173663	0.112618	tr|A0A0J5PMP0|A0A0J5PMP0_ASPFM|tr|A0A0J5SQG5|A0A0J5SQG5_ASPFM	http://amigo.geneontology.org/cgi-bin/amigo/term_details?term=GO:0009967
replicative cell aging	Gene Ontology	GO:0001302	2	20	0.0173663	0.112618	tr|A0A0J5Q0U9|A0A0J5Q0U9_ASPFM|tr|A0A0J5SQG5|A0A0J5SQG5_ASPFM	http://amigo.geneontology.org/cgi-bin/amigo/term_details?term=GO:0001302
single-organism developmental process	Gene Ontology	GO:0044767	8	352	0.0181354	0.117014	tr|A0A0J5PKZ7|A0A0J5PKZ7_ASPFM|tr|A0A0J5Q0U9|A0A0J5Q0U9_ASPFM|tr|A0A0J5SQG5|A0A0J5SQG5_ASPFM|tr|A0A0J5SCF2|A0A0J5SCF2_ASPFM|tr|A0A0J5Q1H9|A0A0J5Q1H9_ASPFM|tr|A0A0J5PRS9|A0A0J5PRS9_ASPFM|tr|A0A0J5PMP0|A0A0J5PMP0_ASPFM|tr|A0A0J5Q1B9|A0A0J5Q1B9_ASPFM	http://amigo.geneontology.org/cgi-bin/amigo/term_details?term=GO:0044767
extracellular region	Gene Ontology	GO:0005576	6	221	0.0185772	0.117848	tr|A0A0J5PWF4|A0A0J5PWF4_ASPFM|tr|A0A0J5Q3T8|A0A0J5Q3T8_ASPFM|tr|A0A0J5PIQ5|A0A0J5PIQ5_ASPFM|tr|A0A0J5PWH4|A0A0J5PWH4_ASPFM|tr|A0A0J5PMP0|A0A0J5PMP0_ASPFM|tr|A0A0J5PF72|A0A0J5PF72_ASPFM	http://amigo.geneontology.org/cgi-bin/amigo/term_details?term=GO:0005576
positive regulation of response to stimulus	Gene Ontology	GO:0048584	3	58	0.0187751	0.117848	tr|A0A0J5PMP0|A0A0J5PMP0_ASPFM|tr|A0A0J5SQG5|A0A0J5SQG5_ASPFM|tr|A0A0J5PHI4|A0A0J5PHI4_ASPFM	http://amigo.geneontology.org/cgi-bin/amigo/term_details?term=GO:0048584
positive regulation of conjugation with cellular fusion	Gene Ontology	GO:0031139	2	21	0.018907	0.117848	tr|A0A0J5PMP0|A0A0J5PMP0_ASPFM|tr|A0A0J5SQG5|A0A0J5SQG5_ASPFM	http://amigo.geneontology.org/cgi-bin/amigo/term_details?term=GO:0031139
positive regulation of chromosome organization	Gene Ontology	GO:2001252	2	21	0.018907	0.117848	tr|A0A0J5PVE5|A0A0J5PVE5_ASPFM|tr|A0A0J5Q6M9|A0A0J5Q6M9_ASPFM	http://amigo.geneontology.org/cgi-bin/amigo/term_details?term=GO:2001252
organic acid transport	Gene Ontology	GO:0015849	2	21	0.018907	0.117848	tr|A0A0J5Q4T5|A0A0J5Q4T5_ASPFM|tr|A0A0J5PHI4|A0A0J5PHI4_ASPFM	http://amigo.geneontology.org/cgi-bin/amigo/term_details?term=GO:0015849
nuclear migration	Gene Ontology	GO:0007097	2	21	0.018907	0.117848	tr|A0A0J5PKZ7|A0A0J5PKZ7_ASPFM|tr|A0A0J5SQG5|A0A0J5SQG5_ASPFM	http://amigo.geneontology.org/cgi-bin/amigo/term_details?term=GO:0007097
positive regulation of conjugation	Gene Ontology	GO:0031136	2	21	0.018907	0.117848	tr|A0A0J5PMP0|A0A0J5PMP0_ASPFM|tr|A0A0J5SQG5|A0A0J5SQG5_ASPFM	http://amigo.geneontology.org/cgi-bin/amigo/term_details?term=GO:0031136
membrane	Gene Ontology	GO:0016020	17	1066	0.0198853	0.122928	tr|A0A0J5PTR2|A0A0J5PTR2_ASPFM|tr|A0A0J5Q5A4|A0A0J5Q5A4_ASPFM|tr|A0A0J5PQE4|A0A0J5PQE4_ASPFM|tr|A0A0J5PHI4|A0A0J5PHI4_ASPFM|tr|A0A0J5PNA9|A0A0J5PNA9_ASPFM|tr|A0A0J5PQL3|A0A0J5PQL3_ASPFM|tr|A0A0J5Q0U9|A0A0J5Q0U9_ASPFM|tr|A0A0J5SQG5|A0A0J5SQG5_ASPFM|tr|A0A0J5Q2G5|A0A0J5Q2G5_ASPFM|tr|A0A0J5PV51|A0A0J5PV51_ASPFM|tr|A0A0J5Q4T5|A0A0J5Q4T5_ASPFM|tr|A0A0J5PN06|A0A0J5PN06_ASPFM|tr|A0A0J5PRS9|A0A0J5PRS9_AS…	http://amigo.geneontology.org/cgi-bin/amigo/term_details?term=GO:0016020
single-organism membrane organization	Gene Ontology	GO:0044802	4	108	0.0200093	0.122928	tr|A0A0J5PRS9|A0A0J5PRS9_ASPFM|tr|A0A0J5Q5A4|A0A0J5Q5A4_ASPFM|tr|A0A0J5SQG5|A0A0J5SQG5_ASPFM|tr|A0A0J5Q0U9|A0A0J5Q0U9_ASPFM	http://amigo.geneontology.org/cgi-bin/amigo/term_details?term=GO:0044802
cellular protein catabolic process	Gene Ontology	GO:0044257	4	108	0.0200093	0.122928	tr|A0A0J5PUB3|A0A0J5PUB3_ASPFM|tr|A0A0J5Q2W2|A0A0J5Q2W2_ASPFM|tr|A0A0J5PVE5|A0A0J5PVE5_ASPFM|tr|A0A0J5PDH8|A0A0J5PDH8_ASPFM	http://amigo.geneontology.org/cgi-bin/amigo/term_details?term=GO:0044257
nucleoside-triphosphatase activity	Gene Ontology	GO:0017111	7	291	0.0203116	0.124191	tr|A0A0J5PKZ7|A0A0J5PKZ7_ASPFM|tr|A0A0J5SQG5|A0A0J5SQG5_ASPFM|tr|A0A0J5PQL3|A0A0J5PQL3_ASPFM|tr|A0A0J5PV51|A0A0J5PV51_ASPFM|tr|A0A0J5STT4|A0A0J5STT4_ASPFM|tr|A0A0J5PRS9|A0A0J5PRS9_ASPFM|tr|A0A0J5Q3U7|A0A0J5Q3U7_ASPFM	http://amigo.geneontology.org/cgi-bin/amigo/term_details?term=GO:0017111
cellular process	Gene Ontology	GO:0009987	36	2833	0.0210382	0.128024	tr|A0A0J5PKY1|A0A0J5PKY1_ASPFM|tr|A0A0J5SQA8|A0A0J5SQA8_ASPFM|tr|A0A0J5Q2W2|A0A0J5Q2W2_ASPFM|tr|A0A0J5PQL3|A0A0J5PQL3_ASPFM|tr|A0A0J5Q3U7|A0A0J5Q3U7_ASPFM|tr|A0A0J5PRM9|A0A0J5PRM9_ASPFM|tr|A0A0J5PWF4|A0A0J5PWF4_ASPFM|tr|A0A0J5PEJ8|A0A0J5PEJ8_ASPFM|tr|A0A0J5PUK7|A0A0J5PUK7_ASPFM|tr|A0A0J5PKZ7|A0A0J5PKZ7_ASPFM|tr|A0A0J5PNA9|A0A0J5PNA9_ASPFM|tr|A0A0J5Q4L0|A0A0J5Q4L0_ASPFM|tr|A0A0J5PRC9|A0A0J5PRC9_AS…	http://amigo.geneontology.org/cgi-bin/amigo/term_details?term=GO:0009987
response to temperature stimulus	Gene Ontology	GO:0009266	3	61	0.0213102	0.128461	tr|A0A0J5PMP0|A0A0J5PMP0_ASPFM|tr|A0A0J5SQG5|A0A0J5SQG5_ASPFM|tr|A0A0J5PHI4|A0A0J5PHI4_ASPFM	http://amigo.geneontology.org/cgi-bin/amigo/term_details?term=GO:0009266
isomerase activity	Gene Ontology	GO:0016853	3	61	0.0213102	0.128461	tr|A0A0J5SQA8|A0A0J5SQA8_ASPFM|tr|A0A0J5Q1H9|A0A0J5Q1H9_ASPFM|tr|A0A0J5Q6L6|A0A0J5Q6L6_ASPFM	http://amigo.geneontology.org/cgi-bin/amigo/term_details?term=GO:0016853
regulation of cellular protein metabolic process	Gene Ontology	GO:0032268	4	111	0.0218152	0.130129	tr|A0A0J5PUB3|A0A0J5PUB3_ASPFM|tr|A0A0J5Q0U9|A0A0J5Q0U9_ASPFM|tr|A0A0J5PMP0|A0A0J5PMP0_ASPFM|tr|A0A0J5PIQ5|A0A0J5PIQ5_ASPFM	http://amigo.geneontology.org/cgi-bin/amigo/term_details?term=GO:0032268
nuclear pore	Gene Ontology	GO:0005643	2	23	0.0221535	0.130129	tr|A0A0J5PKZ7|A0A0J5PKZ7_ASPFM|tr|A0A0J5PH08|A0A0J5PH08_ASPFM	http://amigo.geneontology.org/cgi-bin/amigo/term_details?term=GO:0005643
positive regulation of hydrolase activity	Gene Ontology	GO:0051345	2	23	0.0221535	0.130129	tr|A0A0J5PKZ7|A0A0J5PKZ7_ASPFM|tr|A0A0J5SKW5|A0A0J5SKW5_ASPFM	http://amigo.geneontology.org/cgi-bin/amigo/term_details?term=GO:0051345
positive regulation of cell communication	Gene Ontology	GO:0010647	2	23	0.0221535	0.130129	tr|A0A0J5PMP0|A0A0J5PMP0_ASPFM|tr|A0A0J5SQG5|A0A0J5SQG5_ASPFM	http://amigo.geneontology.org/cgi-bin/amigo/term_details?term=GO:0010647
large ribosomal subunit	Gene Ontology	GO:0015934	3	62	0.0221949	0.130129	tr|A0A0J5PNA9|A0A0J5PNA9_ASPFM|tr|A0A0J5Q0I9|A0A0J5Q0I9_ASPFM|tr|A0A0J5PKY1|A0A0J5PKY1_ASPFM	http://amigo.geneontology.org/cgi-bin/amigo/term_details?term=GO:0015934
cellular protein complex assembly	Gene Ontology	GO:0043623	4	112	0.0224387	0.13096	tr|A0A0J5PKZ7|A0A0J5PKZ7_ASPFM|tr|A0A0J5PUB3|A0A0J5PUB3_ASPFM|tr|A0A0J5Q2W2|A0A0J5Q2W2_ASPFM|tr|A0A0J5PEJ8|A0A0J5PEJ8_ASPFM	http://amigo.geneontology.org/cgi-bin/amigo/term_details?term=GO:0043623
cell cycle	Gene Ontology	GO:0007049	8	367	0.0225561	0.13105	tr|A0A0J5PV51|A0A0J5PV51_ASPFM|tr|A0A0J5PUK7|A0A0J5PUK7_ASPFM|tr|A0A0J5Q6M9|A0A0J5Q6M9_ASPFM|tr|A0A0J5PKZ7|A0A0J5PKZ7_ASPFM|tr|A0A0J5Q1I3|A0A0J5Q1I3_ASPFM|tr|A0A0J5SQG5|A0A0J5SQG5_ASPFM|tr|A0A0J5PVE5|A0A0J5PVE5_ASPFM|tr|A0A0J5PMP0|A0A0J5PMP0_ASPFM	http://amigo.geneontology.org/cgi-bin/amigo/term_details?term=GO:0007049
peptide metabolic process	Gene Ontology	GO:0006518	6	232	0.0228511	0.132166	tr|A0A0J5Q4L0|A0A0J5Q4L0_ASPFM|tr|A0A0J5PKY1|A0A0J5PKY1_ASPFM|tr|A0A0J5PNA9|A0A0J5PNA9_ASPFM|tr|A0A0J5Q0I9|A0A0J5Q0I9_ASPFM|tr|A0A0J5PI11|A0A0J5PI11_ASPFM|tr|A0A0J5PIQ5|A0A0J5PIQ5_ASPFM	http://amigo.geneontology.org/cgi-bin/amigo/term_details?term=GO:0006518
regulation of cell cycle phase transition	Gene Ontology	GO:1901987	3	63	0.0230995	0.13241	tr|A0A0J5PVE5|A0A0J5PVE5_ASPFM|tr|A0A0J5PMP0|A0A0J5PMP0_ASPFM|tr|A0A0J5Q6M9|A0A0J5Q6M9_ASPFM	http://amigo.geneontology.org/cgi-bin/amigo/term_details?term=GO:1901987
regulation of mitotic cell cycle phase transition	Gene Ontology	GO:1901990	3	63	0.0230995	0.13241	tr|A0A0J5PVE5|A0A0J5PVE5_ASPFM|tr|A0A0J5PMP0|A0A0J5PMP0_ASPFM|tr|A0A0J5Q6M9|A0A0J5Q6M9_ASPFM	http://amigo.geneontology.org/cgi-bin/amigo/term_details?term=GO:1901990
single-organism process	Gene Ontology	GO:0044699	30	2274	0.0239267	0.136208	tr|A0A0J5Q2W2|A0A0J5Q2W2_ASPFM|tr|A0A0J5PQL3|A0A0J5PQL3_ASPFM|tr|A0A0J5Q4T5|A0A0J5Q4T5_ASPFM|tr|A0A0J5Q3U7|A0A0J5Q3U7_ASPFM|tr|A0A0J5PWF4|A0A0J5PWF4_ASPFM|tr|A0A0J5PEJ8|A0A0J5PEJ8_ASPFM|tr|A0A0J5PUK7|A0A0J5PUK7_ASPFM|tr|A0A0J5PKZ7|A0A0J5PKZ7_ASPFM|tr|A0A0J5PNA9|A0A0J5PNA9_ASPFM|tr|A0A0J5PVE0|A0A0J5PVE0_ASPFM|tr|A0A0J5PTV6|A0A0J5PTV6_ASPFM|tr|A0A0J5Q5A4|A0A0J5Q5A4_ASPFM|tr|A0A0J5PHI4|A0A0J5PHI4_AS…	http://amigo.geneontology.org/cgi-bin/amigo/term_details?term=GO:0044699
GTPase activity	Gene Ontology	GO:0003924	3	64	0.0240239	0.136208	tr|A0A0J5PRS9|A0A0J5PRS9_ASPFM|tr|A0A0J5PV51|A0A0J5PV51_ASPFM|tr|A0A0J5SQG5|A0A0J5SQG5_ASPFM	http://amigo.geneontology.org/cgi-bin/amigo/term_details?term=GO:0003924
amide biosynthetic process	Gene Ontology	GO:0043604	6	235	0.024123	0.136208	tr|A0A0J5Q4L0|A0A0J5Q4L0_ASPFM|tr|A0A0J5PKY1|A0A0J5PKY1_ASPFM|tr|A0A0J5PNA9|A0A0J5PNA9_ASPFM|tr|A0A0J5Q0I9|A0A0J5Q0I9_ASPFM|tr|A0A0J5PI11|A0A0J5PI11_ASPFM|tr|A0A0J5PIQ5|A0A0J5PIQ5_ASPFM	http://amigo.geneontology.org/cgi-bin/amigo/term_details?term=GO:0043604
developmental process	Gene Ontology	GO:0032502	8	372	0.0241864	0.136208	tr|A0A0J5PKZ7|A0A0J5PKZ7_ASPFM|tr|A0A0J5Q0U9|A0A0J5Q0U9_ASPFM|tr|A0A0J5SQG5|A0A0J5SQG5_ASPFM|tr|A0A0J5SCF2|A0A0J5SCF2_ASPFM|tr|A0A0J5Q1H9|A0A0J5Q1H9_ASPFM|tr|A0A0J5PRS9|A0A0J5PRS9_ASPFM|tr|A0A0J5PMP0|A0A0J5PMP0_ASPFM|tr|A0A0J5Q1B9|A0A0J5Q1B9_ASPFM	http://amigo.geneontology.org/cgi-bin/amigo/term_details?term=GO:0032502
membrane organization	Gene Ontology	GO:0061024	4	115	0.0243742	0.136666	tr|A0A0J5PRS9|A0A0J5PRS9_ASPFM|tr|A0A0J5Q5A4|A0A0J5Q5A4_ASPFM|tr|A0A0J5SQG5|A0A0J5SQG5_ASPFM|tr|A0A0J5Q0U9|A0A0J5Q0U9_ASPFM	http://amigo.geneontology.org/cgi-bin/amigo/term_details?term=GO:0061024
nucleus localization	Gene Ontology	GO:0051647	2	25	0.0256127	0.141731	tr|A0A0J5PKZ7|A0A0J5PKZ7_ASPFM|tr|A0A0J5SQG5|A0A0J5SQG5_ASPFM	http://amigo.geneontology.org/cgi-bin/amigo/term_details?term=GO:0051647
establishment of nucleus localization	Gene Ontology	GO:0040023	2	25	0.0256127	0.141731	tr|A0A0J5PKZ7|A0A0J5PKZ7_ASPFM|tr|A0A0J5SQG5|A0A0J5SQG5_ASPFM	http://amigo.geneontology.org/cgi-bin/amigo/term_details?term=GO:0040023
regulation of protein metabolic process	Gene Ontology	GO:0051246	4	117	0.0257191	0.141731	tr|A0A0J5PUB3|A0A0J5PUB3_ASPFM|tr|A0A0J5Q0U9|A0A0J5Q0U9_ASPFM|tr|A0A0J5PMP0|A0A0J5PMP0_ASPFM|tr|A0A0J5PIQ5|A0A0J5PIQ5_ASPFM	http://amigo.geneontology.org/cgi-bin/amigo/term_details?term=GO:0051246
protein catabolic process	Gene Ontology	GO:0030163	4	117	0.0257191	0.141731	tr|A0A0J5PUB3|A0A0J5PUB3_ASPFM|tr|A0A0J5Q2W2|A0A0J5Q2W2_ASPFM|tr|A0A0J5PVE5|A0A0J5PVE5_ASPFM|tr|A0A0J5PDH8|A0A0J5PDH8_ASPFM	http://amigo.geneontology.org/cgi-bin/amigo/term_details?term=GO:0030163
small-subunit processome	Gene Ontology	GO:0032040	2	26	0.0274193	0.150455	tr|A0A0J5PNA9|A0A0J5PNA9_ASPFM|tr|A0A0J5PNE9|A0A0J5PNE9_ASPFM	http://amigo.geneontology.org/cgi-bin/amigo/term_details?term=GO:0032040
Golgi vesicle transport	Gene Ontology	GO:0048193	3	69	0.0289437	0.158144	tr|A0A0J5PRS9|A0A0J5PRS9_ASPFM|tr|A0A0J5PV51|A0A0J5PV51_ASPFM|tr|A0A0J5PHI4|A0A0J5PHI4_ASPFM	http://amigo.geneontology.org/cgi-bin/amigo/term_details?term=GO:0048193
isoprenoid biosynthetic process	Gene Ontology	GO:0008299	2	27	0.0292758	0.15928	tr|A0A0J5PUK7|A0A0J5PUK7_ASPFM|tr|A0A0J5Q6L6|A0A0J5Q6L6_ASPFM	http://amigo.geneontology.org/cgi-bin/amigo/term_details?term=GO:0008299
cellular component biogenesis	Gene Ontology	GO:0044085	9	464	0.0305444	0.165303	tr|A0A0J5PKY1|A0A0J5PKY1_ASPFM|tr|A0A0J5PEJ8|A0A0J5PEJ8_ASPFM|tr|A0A0J5PKZ7|A0A0J5PKZ7_ASPFM|tr|A0A0J5PUB3|A0A0J5PUB3_ASPFM|tr|A0A0J5Q2W2|A0A0J5Q2W2_ASPFM|tr|A0A0J5Q4L0|A0A0J5Q4L0_ASPFM|tr|A0A0J5PNE9|A0A0J5PNE9_ASPFM|tr|A0A0J5PMP0|A0A0J5PMP0_ASPFM|tr|A0A0J5PIQ5|A0A0J5PIQ5_ASPFM	http://amigo.geneontology.org/cgi-bin/amigo/term_details?term=GO:0044085
mitotic sister chromatid segregation	Gene Ontology	GO:0000070	3	71	0.0310501	0.165303	tr|A0A0J5PVE5|A0A0J5PVE5_ASPFM|tr|A0A0J5PMP0|A0A0J5PMP0_ASPFM|tr|A0A0J5Q6M9|A0A0J5Q6M9_ASPFM	http://amigo.geneontology.org/cgi-bin/amigo/term_details?term=GO:0000070
regulation of chromosome organization	Gene Ontology	GO:0033044	3	71	0.0310501	0.165303	tr|A0A0J5PVE5|A0A0J5PVE5_ASPFM|tr|A0A0J5PMP0|A0A0J5PMP0_ASPFM|tr|A0A0J5Q6M9|A0A0J5Q6M9_ASPFM	http://amigo.geneontology.org/cgi-bin/amigo/term_details?term=GO:0033044
regulation of conjugation	Gene Ontology	GO:0046999	2	28	0.0311811	0.165303	tr|A0A0J5PMP0|A0A0J5PMP0_ASPFM|tr|A0A0J5SQG5|A0A0J5SQG5_ASPFM	http://amigo.geneontology.org/cgi-bin/amigo/term_details?term=GO:0046999
regulation of conjugation with cellular fusion	Gene Ontology	GO:0031137	2	28	0.0311811	0.165303	tr|A0A0J5PMP0|A0A0J5PMP0_ASPFM|tr|A0A0J5SQG5|A0A0J5SQG5_ASPFM	http://amigo.geneontology.org/cgi-bin/amigo/term_details?term=GO:0031137
protein complex subunit organization	Gene Ontology	GO:0071822	5	185	0.0313218	0.165303	tr|A0A0J5PKZ7|A0A0J5PKZ7_ASPFM|tr|A0A0J5PUB3|A0A0J5PUB3_ASPFM|tr|A0A0J5Q2W2|A0A0J5Q2W2_ASPFM|tr|A0A0J5PIQ5|A0A0J5PIQ5_ASPFM|tr|A0A0J5PEJ8|A0A0J5PEJ8_ASPFM	http://amigo.geneontology.org/cgi-bin/amigo/term_details?term=GO:0071822
regulation of cellular component organization	Gene Ontology	GO:0051128	5	185	0.0313218	0.165303	tr|A0A0J5PVE5|A0A0J5PVE5_ASPFM|tr|A0A0J5PMP0|A0A0J5PMP0_ASPFM|tr|A0A0J5SQG5|A0A0J5SQG5_ASPFM|tr|A0A0J5Q6M9|A0A0J5Q6M9_ASPFM|tr|A0A0J5PIQ5|A0A0J5PIQ5_ASPFM	http://amigo.geneontology.org/cgi-bin/amigo/term_details?term=GO:0051128
positive regulation of macromolecule metabolic process	Gene Ontology	GO:0010604	4	125	0.0315415	0.165303	tr|A0A0J5PUB3|A0A0J5PUB3_ASPFM|tr|A0A0J5SKW5|A0A0J5SKW5_ASPFM|tr|A0A0J5SQG5|A0A0J5SQG5_ASPFM|tr|A0A0J5PIQ5|A0A0J5PIQ5_ASPFM	http://amigo.geneontology.org/cgi-bin/amigo/term_details?term=GO:0010604
organophosphate biosynthetic process	Gene Ontology	GO:0090407	4	125	0.0315415	0.165303	tr|A0A0J5PQL3|A0A0J5PQL3_ASPFM|tr|A0A0J5SQG5|A0A0J5SQG5_ASPFM|tr|A0A0J5PUK7|A0A0J5PUK7_ASPFM|tr|A0A0J5Q6L6|A0A0J5Q6L6_ASPFM	http://amigo.geneontology.org/cgi-bin/amigo/term_details?term=GO:0090407
mitotic cell cycle phase transition	Gene Ontology	GO:0044772	3	72	0.0321328	0.166365	tr|A0A0J5PVE5|A0A0J5PVE5_ASPFM|tr|A0A0J5PMP0|A0A0J5PMP0_ASPFM|tr|A0A0J5Q6M9|A0A0J5Q6M9_ASPFM	http://amigo.geneontology.org/cgi-bin/amigo/term_details?term=GO:0044772
fungal-type cell wall	Gene Ontology	GO:0009277	3	72	0.0321328	0.166365	tr|A0A0J5PWF4|A0A0J5PWF4_ASPFM|tr|A0A0J5PMP0|A0A0J5PMP0_ASPFM|tr|A0A0J5Q4L0|A0A0J5Q4L0_ASPFM	http://amigo.geneontology.org/cgi-bin/amigo/term_details?term=GO:0009277
positive regulation of cellular component organization	Gene Ontology	GO:0051130	3	72	0.0321328	0.166365	tr|A0A0J5PVE5|A0A0J5PVE5_ASPFM|tr|A0A0J5PMP0|A0A0J5PMP0_ASPFM|tr|A0A0J5Q6M9|A0A0J5Q6M9_ASPFM	http://amigo.geneontology.org/cgi-bin/amigo/term_details?term=GO:0051130
mitochondrion organization	Gene Ontology	GO:0007005	4	126	0.0323196	0.16666	tr|A0A0J5Q5A4|A0A0J5Q5A4_ASPFM|tr|A0A0J5Q1B9|A0A0J5Q1B9_ASPFM|tr|A0A0J5Q0U9|A0A0J5Q0U9_ASPFM|tr|A0A0J5PEJ8|A0A0J5PEJ8_ASPFM	http://amigo.geneontology.org/cgi-bin/amigo/term_details?term=GO:0007005
nucleotide metabolic process	Gene Ontology	GO:0009117	4	127	0.0331089	0.167349	tr|A0A0J5PRC9|A0A0J5PRC9_ASPFM|tr|A0A0J5PQL3|A0A0J5PQL3_ASPFM|tr|A0A0J5PWF4|A0A0J5PWF4_ASPFM|tr|A0A0J5SQG5|A0A0J5SQG5_ASPFM	http://amigo.geneontology.org/cgi-bin/amigo/term_details?term=GO:0009117
isoprenoid metabolic process	Gene Ontology	GO:0006720	2	29	0.0331342	0.167349	tr|A0A0J5PUK7|A0A0J5PUK7_ASPFM|tr|A0A0J5Q6L6|A0A0J5Q6L6_ASPFM	http://amigo.geneontology.org/cgi-bin/amigo/term_details?term=GO:0006720
proton transport	Gene Ontology	GO:0015992	2	29	0.0331342	0.167349	tr|A0A0J5Q4T5|A0A0J5Q4T5_ASPFM|tr|A0A0J5PQL3|A0A0J5PQL3_ASPFM	http://amigo.geneontology.org/cgi-bin/amigo/term_details?term=GO:0015992
proteolysis	Gene Ontology	GO:0006508	5	188	0.0331879	0.167349	tr|A0A0J5PUB3|A0A0J5PUB3_ASPFM|tr|A0A0J5Q2W2|A0A0J5Q2W2_ASPFM|tr|A0A0J5Q0U9|A0A0J5Q0U9_ASPFM|tr|A0A0J5PVE5|A0A0J5PVE5_ASPFM|tr|A0A0J5PDH8|A0A0J5PDH8_ASPFM	http://amigo.geneontology.org/cgi-bin/amigo/term_details?term=GO:0006508
enzyme regulator activity	Gene Ontology	GO:0030234	3	73	0.0332351	0.167349	tr|A0A0J5PMP0|A0A0J5PMP0_ASPFM|tr|A0A0J5SKW5|A0A0J5SKW5_ASPFM|tr|A0A0J5PVS4|A0A0J5PVS4_ASPFM	http://amigo.geneontology.org/cgi-bin/amigo/term_details?term=GO:0030234
ion transmembrane transport	Gene Ontology	GO:0034220	3	74	0.034357	0.172322	tr|A0A0J5PN06|A0A0J5PN06_ASPFM|tr|A0A0J5Q4T5|A0A0J5Q4T5_ASPFM|tr|A0A0J5PQL3|A0A0J5PQL3_ASPFM	http://amigo.geneontology.org/cgi-bin/amigo/term_details?term=GO:0034220
hydrogen transport	Gene Ontology	GO:0006818	2	30	0.0351341	0.174854	tr|A0A0J5Q4T5|A0A0J5Q4T5_ASPFM|tr|A0A0J5PQL3|A0A0J5PQL3_ASPFM	http://amigo.geneontology.org/cgi-bin/amigo/term_details?term=GO:0006818
negative regulation of cellular protein metabolic process	Gene Ontology	GO:0032269	2	30	0.0351341	0.174854	tr|A0A0J5Q0U9|A0A0J5Q0U9_ASPFM|tr|A0A0J5PMP0|A0A0J5PMP0_ASPFM	http://amigo.geneontology.org/cgi-bin/amigo/term_details?term=GO:0032269
transporter activity	Gene Ontology	GO:0005215	7	328	0.0353837	0.175308	tr|A0A0J5PTR2|A0A0J5PTR2_ASPFM|tr|A0A0J5Q2G5|A0A0J5Q2G5_ASPFM|tr|A0A0J5PH08|A0A0J5PH08_ASPFM|tr|A0A0J5PQL3|A0A0J5PQL3_ASPFM|tr|A0A0J5Q4T5|A0A0J5Q4T5_ASPFM|tr|A0A0J5PN06|A0A0J5PN06_ASPFM|tr|A0A0J5Q3U7|A0A0J5Q3U7_ASPFM	http://amigo.geneontology.org/cgi-bin/amigo/term_details?term=GO:0005215
cell cycle phase transition	Gene Ontology	GO:0044770	3	75	0.0354985	0.175308	tr|A0A0J5PVE5|A0A0J5PVE5_ASPFM|tr|A0A0J5PMP0|A0A0J5PMP0_ASPFM|tr|A0A0J5Q6M9|A0A0J5Q6M9_ASPFM	http://amigo.geneontology.org/cgi-bin/amigo/term_details?term=GO:0044770
mitochondrion	Gene Ontology	GO:0005739	10	556	0.0358903	0.176564	tr|A0A0J5PN06|A0A0J5PN06_ASPFM|tr|A0A0J5Q5A4|A0A0J5Q5A4_ASPFM|tr|A0A0J5SKW5|A0A0J5SKW5_ASPFM|tr|A0A0J5PV51|A0A0J5PV51_ASPFM|tr|A0A0J5PQL3|A0A0J5PQL3_ASPFM|tr|A0A0J5Q0U9|A0A0J5Q0U9_ASPFM|tr|A0A0J5SQG5|A0A0J5SQG5_ASPFM|tr|A0A0J5SCF2|A0A0J5SCF2_ASPFM|tr|A0A0J5Q3U7|A0A0J5Q3U7_ASPFM|tr|A0A0J5Q1B9|A0A0J5Q1B9_ASPFM	http://amigo.geneontology.org/cgi-bin/amigo/term_details?term=GO:0005739
mitotic cell cycle process	Gene Ontology	GO:1903047	5	193	0.03645	0.177954	tr|A0A0J5PKZ7|A0A0J5PKZ7_ASPFM|tr|A0A0J5PVE5|A0A0J5PVE5_ASPFM|tr|A0A0J5PMP0|A0A0J5PMP0_ASPFM|tr|A0A0J5SQG5|A0A0J5SQG5_ASPFM|tr|A0A0J5Q6M9|A0A0J5Q6M9_ASPFM	http://amigo.geneontology.org/cgi-bin/amigo/term_details?term=GO:1903047
sister chromatid segregation	Gene Ontology	GO:0000819	3	76	0.0366594	0.178298	tr|A0A0J5PVE5|A0A0J5PVE5_ASPFM|tr|A0A0J5PMP0|A0A0J5PMP0_ASPFM|tr|A0A0J5Q6M9|A0A0J5Q6M9_ASPFM	http://amigo.geneontology.org/cgi-bin/amigo/term_details?term=GO:0000819
secretion by cell	Gene Ontology	GO:0032940	2	31	0.0371798	0.179012	tr|A0A0J5PRS9|A0A0J5PRS9_ASPFM|tr|A0A0J5PV51|A0A0J5PV51_ASPFM	http://amigo.geneontology.org/cgi-bin/amigo/term_details?term=GO:0032940
secretion	Gene Ontology	GO:0046903	2	31	0.0371798	0.179012	tr|A0A0J5PRS9|A0A0J5PRS9_ASPFM|tr|A0A0J5PV51|A0A0J5PV51_ASPFM	http://amigo.geneontology.org/cgi-bin/amigo/term_details?term=GO:0046903
nucleoside phosphate metabolic process	Gene Ontology	GO:0006753	4	132	0.0372244	0.179012	tr|A0A0J5PRC9|A0A0J5PRC9_ASPFM|tr|A0A0J5PQL3|A0A0J5PQL3_ASPFM|tr|A0A0J5PWF4|A0A0J5PWF4_ASPFM|tr|A0A0J5SQG5|A0A0J5SQG5_ASPFM	http://amigo.geneontology.org/cgi-bin/amigo/term_details?term=GO:0006753
cell wall	Gene Ontology	GO:0005618	3	77	0.0378397	0.181292	tr|A0A0J5PWF4|A0A0J5PWF4_ASPFM|tr|A0A0J5PMP0|A0A0J5PMP0_ASPFM|tr|A0A0J5Q4L0|A0A0J5Q4L0_ASPFM	http://amigo.geneontology.org/cgi-bin/amigo/term_details?term=GO:0005618
external encapsulating structure	Gene Ontology	GO:0030312	3	78	0.0390394	0.185379	tr|A0A0J5PWF4|A0A0J5PWF4_ASPFM|tr|A0A0J5PMP0|A0A0J5PMP0_ASPFM|tr|A0A0J5Q4L0|A0A0J5Q4L0_ASPFM	http://amigo.geneontology.org/cgi-bin/amigo/term_details?term=GO:0030312
negative regulation of protein metabolic process	Gene Ontology	GO:0051248	2	32	0.0392703	0.185379	tr|A0A0J5Q0U9|A0A0J5Q0U9_ASPFM|tr|A0A0J5PMP0|A0A0J5PMP0_ASPFM	http://amigo.geneontology.org/cgi-bin/amigo/term_details?term=GO:0051248
ubiquitin-protein transferase activity	Gene Ontology	GO:0004842	2	32	0.0392703	0.185379	tr|A0A0J5Q1L6|A0A0J5Q1L6_ASPFM|tr|A0A0J5PDH8|A0A0J5PDH8_ASPFM	http://amigo.geneontology.org/cgi-bin/amigo/term_details?term=GO:0004842
cellular response to pH	Gene Ontology	GO:0071467	2	32	0.0392703	0.185379	tr|A0A0J5PMP0|A0A0J5PMP0_ASPFM|tr|A0A0J5PHI4|A0A0J5PHI4_ASPFM	http://amigo.geneontology.org/cgi-bin/amigo/term_details?term=GO:0071467
negative regulation of cellular process	Gene Ontology	GO:0048523	6	265	0.0395187	0.185868	tr|A0A0J5PUK7|A0A0J5PUK7_ASPFM|tr|A0A0J5PV51|A0A0J5PV51_ASPFM|tr|A0A0J5SQG5|A0A0J5SQG5_ASPFM|tr|A0A0J5Q0U9|A0A0J5Q0U9_ASPFM|tr|A0A0J5Q1I3|A0A0J5Q1I3_ASPFM|tr|A0A0J5PMP0|A0A0J5PMP0_ASPFM	http://amigo.geneontology.org/cgi-bin/amigo/term_details?term=GO:0048523
cellular macromolecular complex assembly	Gene Ontology	GO:0034622	5	199	0.0406183	0.190343	tr|A0A0J5PKZ7|A0A0J5PKZ7_ASPFM|tr|A0A0J5PUB3|A0A0J5PUB3_ASPFM|tr|A0A0J5Q2W2|A0A0J5Q2W2_ASPFM|tr|A0A0J5PKY1|A0A0J5PKY1_ASPFM|tr|A0A0J5PEJ8|A0A0J5PEJ8_ASPFM	http://amigo.geneontology.org/cgi-bin/amigo/term_details?term=GO:0034622
mitotic cell cycle	Gene Ontology	GO:0000278	5	200	0.0413402	0.191235	tr|A0A0J5PKZ7|A0A0J5PKZ7_ASPFM|tr|A0A0J5PVE5|A0A0J5PVE5_ASPFM|tr|A0A0J5PMP0|A0A0J5PMP0_ASPFM|tr|A0A0J5SQG5|A0A0J5SQG5_ASPFM|tr|A0A0J5Q6M9|A0A0J5Q6M9_ASPFM	http://amigo.geneontology.org/cgi-bin/amigo/term_details?term=GO:0000278
glyoxysome	Gene Ontology	GO:0009514	2	33	0.0414045	0.191235	tr|A0A0J5PF02|A0A0J5PF02_ASPFM|tr|A0A0J5PVE0|A0A0J5PVE0_ASPFM	http://amigo.geneontology.org/cgi-bin/amigo/term_details?term=GO:0009514
ER to Golgi vesicle-mediated transport	Gene Ontology	GO:0006888	2	33	0.0414045	0.191235	tr|A0A0J5PV51|A0A0J5PV51_ASPFM|tr|A0A0J5PHI4|A0A0J5PHI4_ASPFM	http://amigo.geneontology.org/cgi-bin/amigo/term_details?term=GO:0006888
hyphal cell wall	Gene Ontology	GO:0030446	2	33	0.0414045	0.191235	tr|A0A0J5PWF4|A0A0J5PWF4_ASPFM|tr|A0A0J5Q4L0|A0A0J5Q4L0_ASPFM	http://amigo.geneontology.org/cgi-bin/amigo/term_details?term=GO:0030446
carbohydrate derivative biosynthetic process	Gene Ontology	GO:1901137	4	138	0.0425364	0.195759	tr|A0A0J5PQL3|A0A0J5PQL3_ASPFM|tr|A0A0J5PMP0|A0A0J5PMP0_ASPFM|tr|A0A0J5SQG5|A0A0J5SQG5_ASPFM|tr|A0A0J5SQA8|A0A0J5SQA8_ASPFM	http://amigo.geneontology.org/cgi-bin/amigo/term_details?term=GO:1901137
cellular amide metabolic process	Gene Ontology	GO:0043603	6	271	0.0432087	0.198143	tr|A0A0J5Q4L0|A0A0J5Q4L0_ASPFM|tr|A0A0J5PKY1|A0A0J5PKY1_ASPFM|tr|A0A0J5PNA9|A0A0J5PNA9_ASPFM|tr|A0A0J5Q0I9|A0A0J5Q0I9_ASPFM|tr|A0A0J5PI11|A0A0J5PI11_ASPFM|tr|A0A0J5PIQ5|A0A0J5PIQ5_ASPFM	http://amigo.geneontology.org/cgi-bin/amigo/term_details?term=GO:0043603
intracellular signal transduction	Gene Ontology	GO:0035556	4	139	0.0434614	0.198592	tr|A0A0J5PRS9|A0A0J5PRS9_ASPFM|tr|A0A0J5PV51|A0A0J5PV51_ASPFM|tr|A0A0J5PMP0|A0A0J5PMP0_ASPFM|tr|A0A0J5SQG5|A0A0J5SQG5_ASPFM	http://amigo.geneontology.org/cgi-bin/amigo/term_details?term=GO:0035556
nucleocytoplasmic transport	Gene Ontology	GO:0006913	3	82	0.0440299	0.200477	tr|A0A0J5PRS9|A0A0J5PRS9_ASPFM|tr|A0A0J5PV51|A0A0J5PV51_ASPFM|tr|A0A0J5SQG5|A0A0J5SQG5_ASPFM	http://amigo.geneontology.org/cgi-bin/amigo/term_details?term=GO:0006913
regulation of organelle organization	Gene Ontology	GO:0033043	4	140	0.0443977	0.200728	tr|A0A0J5PVE5|A0A0J5PVE5_ASPFM|tr|A0A0J5PMP0|A0A0J5PMP0_ASPFM|tr|A0A0J5SQG5|A0A0J5SQG5_ASPFM|tr|A0A0J5Q6M9|A0A0J5Q6M9_ASPFM	http://amigo.geneontology.org/cgi-bin/amigo/term_details?term=GO:0033043
nuclear division	Gene Ontology	GO:0000280	4	140	0.0443977	0.200728	tr|A0A0J5PVE5|A0A0J5PVE5_ASPFM|tr|A0A0J5PMP0|A0A0J5PMP0_ASPFM|tr|A0A0J5SQG5|A0A0J5SQG5_ASPFM|tr|A0A0J5Q6M9|A0A0J5Q6M9_ASPFM	http://amigo.geneontology.org/cgi-bin/amigo/term_details?term=GO:0000280
nuclear transport	Gene Ontology	GO:0051169	3	83	0.0453252	0.204202	tr|A0A0J5PRS9|A0A0J5PRS9_ASPFM|tr|A0A0J5PV51|A0A0J5PV51_ASPFM|tr|A0A0J5SQG5|A0A0J5SQG5_ASPFM	http://amigo.geneontology.org/cgi-bin/amigo/term_details?term=GO:0051169
response to pH	Gene Ontology	GO:0009268	2	35	0.0458004	0.204905	tr|A0A0J5PMP0|A0A0J5PMP0_ASPFM|tr|A0A0J5PHI4|A0A0J5PHI4_ASPFM	http://amigo.geneontology.org/cgi-bin/amigo/term_details?term=GO:0009268
ubiquitin-like protein transferase activity	Gene Ontology	GO:0019787	2	35	0.0458004	0.204905	tr|A0A0J5Q1L6|A0A0J5Q1L6_ASPFM|tr|A0A0J5PDH8|A0A0J5PDH8_ASPFM	http://amigo.geneontology.org/cgi-bin/amigo/term_details?term=GO:0019787
positive regulation of RNA metabolic process	Gene Ontology	GO:0051254	3	85	0.0479721	0.210962	tr|A0A0J5SKW5|A0A0J5SKW5_ASPFM|tr|A0A0J5SQG5|A0A0J5SQG5_ASPFM|tr|A0A0J5PIQ5|A0A0J5PIQ5_ASPFM	http://amigo.geneontology.org/cgi-bin/amigo/term_details?term=GO:0051254
preribosome, large subunit precursor	Gene Ontology	GO:0030687	2	36	0.0480601	0.210962	tr|A0A0J5Q0I9|A0A0J5Q0I9_ASPFM|tr|A0A0J5PKY1|A0A0J5PKY1_ASPFM	http://amigo.geneontology.org/cgi-bin/amigo/term_details?term=GO:0030687
maturation of SSU-rRNA from tricistronic rRNA transcript (SSU-rRNA, 5.8S rRNA, LSU-rRNA)	Gene Ontology	GO:0000462	2	36	0.0480601	0.210962	tr|A0A0J5PNE9|A0A0J5PNE9_ASPFM|tr|A0A0J5Q4L0|A0A0J5Q4L0_ASPFM	http://amigo.geneontology.org/cgi-bin/amigo/term_details?term=GO:0000462
ribosome biogenesis	Gene Ontology	GO:0042254	4	144	0.0482564	0.210962	tr|A0A0J5PNE9|A0A0J5PNE9_ASPFM|tr|A0A0J5PKY1|A0A0J5PKY1_ASPFM|tr|A0A0J5Q4L0|A0A0J5Q4L0_ASPFM|tr|A0A0J5PIQ5|A0A0J5PIQ5_ASPFM	http://amigo.geneontology.org/cgi-bin/amigo/term_details?term=GO:0042254
nuclear chromosome segregation	Gene Ontology	GO:0098813	3	86	0.0493237	0.210962	tr|A0A0J5PVE5|A0A0J5PVE5_ASPFM|tr|A0A0J5PMP0|A0A0J5PMP0_ASPFM|tr|A0A0J5Q6M9|A0A0J5Q6M9_ASPFM	http://amigo.geneontology.org/cgi-bin/amigo/term_details?term=GO:0098813
filamentous growth of a population of unicellular organisms	Gene Ontology	GO:0044182	4	146	0.0502536	0.210962	tr|A0A0J5PNA9|A0A0J5PNA9_ASPFM|tr|A0A0J5PMP0|A0A0J5PMP0_ASPFM|tr|A0A0J5SQG5|A0A0J5SQG5_ASPFM|tr|A0A0J5PHI4|A0A0J5PHI4_ASPFM	http://amigo.geneontology.org/cgi-bin/amigo/term_details?term=GO:0044182
Ras protein signal transduction	Gene Ontology	GO:0007265	2	37	0.0503599	0.210962	tr|A0A0J5PMP0|A0A0J5PMP0_ASPFM|tr|A0A0J5SQG5|A0A0J5SQG5_ASPFM	http://amigo.geneontology.org/cgi-bin/amigo/term_details?term=GO:0007265
ubiquitin ligase complex	Gene Ontology	GO:0000151	2	37	0.0503599	0.210962	tr|A0A0J5Q1L6|A0A0J5Q1L6_ASPFM|tr|A0A0J5PDH8|A0A0J5PDH8_ASPFM	http://amigo.geneontology.org/cgi-bin/amigo/term_details?term=GO:0000151
regulation of growth	Gene Ontology	GO:0040008	3	87	0.0506938	0.210962	tr|A0A0J5PMP0|A0A0J5PMP0_ASPFM|tr|A0A0J5SQG5|A0A0J5SQG5_ASPFM|tr|A0A0J5PHI4|A0A0J5PHI4_ASPFM	http://amigo.geneontology.org/cgi-bin/amigo/term_details?term=GO:0040008
cell communication	Gene Ontology	GO:0007154	6	283	0.0512249	0.210962	tr|A0A0J5PHI4|A0A0J5PHI4_ASPFM|tr|A0A0J5PNA9|A0A0J5PNA9_ASPFM|tr|A0A0J5SQG5|A0A0J5SQG5_ASPFM|tr|A0A0J5PV51|A0A0J5PV51_ASPFM|tr|A0A0J5PRS9|A0A0J5PRS9_ASPFM|tr|A0A0J5PMP0|A0A0J5PMP0_ASPFM	http://amigo.geneontology.org/cgi-bin/amigo/term_details?term=GO:0007154
developmental process involved in reproduction	Gene Ontology	GO:0003006	5	213	0.0514366	0.210962	tr|A0A0J5PKZ7|A0A0J5PKZ7_ASPFM|tr|A0A0J5PRS9|A0A0J5PRS9_ASPFM|tr|A0A0J5PMP0|A0A0J5PMP0_ASPFM|tr|A0A0J5SQG5|A0A0J5SQG5_ASPFM|tr|A0A0J5Q1H9|A0A0J5Q1H9_ASPFM	http://amigo.geneontology.org/cgi-bin/amigo/term_details?term=GO:0003006
protein complex biogenesis	Gene Ontology	GO:0070271	4	148	0.052296	0.210962	tr|A0A0J5PKZ7|A0A0J5PKZ7_ASPFM|tr|A0A0J5PUB3|A0A0J5PUB3_ASPFM|tr|A0A0J5Q2W2|A0A0J5Q2W2_ASPFM|tr|A0A0J5PEJ8|A0A0J5PEJ8_ASPFM	http://amigo.geneontology.org/cgi-bin/amigo/term_details?term=GO:0070271
protein complex assembly	Gene Ontology	GO:0006461	4	148	0.052296	0.210962	tr|A0A0J5PKZ7|A0A0J5PKZ7_ASPFM|tr|A0A0J5PUB3|A0A0J5PUB3_ASPFM|tr|A0A0J5Q2W2|A0A0J5Q2W2_ASPFM|tr|A0A0J5PEJ8|A0A0J5PEJ8_ASPFM	http://amigo.geneontology.org/cgi-bin/amigo/term_details?term=GO:0006461
endomembrane system organization	Gene Ontology	GO:0010256	2	38	0.0526987	0.210962	tr|A0A0J5PV51|A0A0J5PV51_ASPFM|tr|A0A0J5SQG5|A0A0J5SQG5_ASPFM	http://amigo.geneontology.org/cgi-bin/amigo/term_details?term=GO:0010256
regulation of hydrolase activity	Gene Ontology	GO:0051336	2	38	0.0526987	0.210962	tr|A0A0J5PKZ7|A0A0J5PKZ7_ASPFM|tr|A0A0J5SKW5|A0A0J5SKW5_ASPFM	http://amigo.geneontology.org/cgi-bin/amigo/term_details?term=GO:0051336
box C/D snoRNP complex	Gene Ontology	GO:0031428	1	5	0.054299	0.210962	tr|A0A0J5PNE9|A0A0J5PNE9_ASPFM	http://amigo.geneontology.org/cgi-bin/amigo/term_details?term=GO:0031428
fungal-type cell wall chitin biosynthetic process	Gene Ontology	GO:0034221	1	5	0.054299	0.210962	tr|A0A0J5PMP0|A0A0J5PMP0_ASPFM	http://amigo.geneontology.org/cgi-bin/amigo/term_details?term=GO:0034221
NADH dehydrogenase (quinone) activity	Gene Ontology	GO:0050136	1	5	0.054299	0.210962	tr|A0A0J5PEJ8|A0A0J5PEJ8_ASPFM	http://amigo.geneontology.org/cgi-bin/amigo/term_details?term=GO:0050136
regulation of proteasomal ubiquitin-dependent protein catabolic process	Gene Ontology	GO:0032434	1	5	0.054299	0.210962	tr|A0A0J5PUB3|A0A0J5PUB3_ASPFM	http://amigo.geneontology.org/cgi-bin/amigo/term_details?term=GO:0032434
mitotic cell cycle arrest in response to pheromone	Gene Ontology	GO:0000751	1	5	0.054299	0.210962	tr|A0A0J5SQG5|A0A0J5SQG5_ASPFM	http://amigo.geneontology.org/cgi-bin/amigo/term_details?term=GO:0000751
positive regulation of proteasomal ubiquitin-dependent protein catabolic process	Gene Ontology	GO:0032436	1	5	0.054299	0.210962	tr|A0A0J5PUB3|A0A0J5PUB3_ASPFM	http://amigo.geneontology.org/cgi-bin/amigo/term_details?term=GO:0032436
positive regulation of filamentous growth of a population of unicellular organisms in response to neutral pH	Gene Ontology	GO:1900442	1	5	0.054299	0.210962	tr|A0A0J5PMP0|A0A0J5PMP0_ASPFM	http://amigo.geneontology.org/cgi-bin/amigo/term_details?term=GO:1900442
regulation of filamentous growth of a population of unicellular organisms in response to neutral pH	Gene Ontology	GO:1900440	1	5	0.054299	0.210962	tr|A0A0J5PMP0|A0A0J5PMP0_ASPFM	http://amigo.geneontology.org/cgi-bin/amigo/term_details?term=GO:1900440
positive regulation of cellular protein catabolic process	Gene Ontology	GO:1903364	1	5	0.054299	0.210962	tr|A0A0J5PUB3|A0A0J5PUB3_ASPFM	http://amigo.geneontology.org/cgi-bin/amigo/term_details?term=GO:1903364
nitronate monooxygenase activity	Gene Ontology	GO:0018580	1	5	0.054299	0.210962	tr|A0A0J5PVE0|A0A0J5PVE0_ASPFM	http://amigo.geneontology.org/cgi-bin/amigo/term_details?term=GO:0018580
NADH dehydrogenase activity	Gene Ontology	GO:0003954	1	5	0.054299	0.210962	tr|A0A0J5PEJ8|A0A0J5PEJ8_ASPFM	http://amigo.geneontology.org/cgi-bin/amigo/term_details?term=GO:0003954
meiotic spindle	Gene Ontology	GO:0072687	1	5	0.054299	0.210962	tr|A0A0J5PKZ7|A0A0J5PKZ7_ASPFM	http://amigo.geneontology.org/cgi-bin/amigo/term_details?term=GO:0072687
pyrimidine-containing compound salvage	Gene Ontology	GO:0008655	1	5	0.054299	0.210962	tr|A0A0J5PRM9|A0A0J5PRM9_ASPFM	http://amigo.geneontology.org/cgi-bin/amigo/term_details?term=GO:0008655
phosphoprotein binding	Gene Ontology	GO:0051219	1	5	0.054299	0.210962	tr|A0A0J5PMP0|A0A0J5PMP0_ASPFM	http://amigo.geneontology.org/cgi-bin/amigo/term_details?term=GO:0051219
positive regulation of proteolysis involved in cellular protein catabolic process	Gene Ontology	GO:1903052	1	5	0.054299	0.210962	tr|A0A0J5PUB3|A0A0J5PUB3_ASPFM	http://amigo.geneontology.org/cgi-bin/amigo/term_details?term=GO:1903052
proteasome core complex, alpha-subunit complex	Gene Ontology	GO:0019773	1	5	0.054299	0.210962	tr|A0A0J5Q2W2|A0A0J5Q2W2_ASPFM	http://amigo.geneontology.org/cgi-bin/amigo/term_details?term=GO:0019773
positive regulation of filamentous growth of a population of unicellular organisms in response to pH	Gene Ontology	GO:1900743	1	5	0.054299	0.210962	tr|A0A0J5PMP0|A0A0J5PMP0_ASPFM	http://amigo.geneontology.org/cgi-bin/amigo/term_details?term=GO:1900743
NADH metabolic process	Gene Ontology	GO:0006734	1	5	0.054299	0.210962	tr|A0A0J5PRC9|A0A0J5PRC9_ASPFM	http://amigo.geneontology.org/cgi-bin/amigo/term_details?term=GO:0006734
monocarboxylic acid transmembrane transporter activity	Gene Ontology	GO:0008028	1	5	0.054299	0.210962	tr|A0A0J5Q4T5|A0A0J5Q4T5_ASPFM	http://amigo.geneontology.org/cgi-bin/amigo/term_details?term=GO:0008028
regulation of filamentous growth of a population of unicellular organisms in response to pH	Gene Ontology	GO:1900741	1	5	0.054299	0.210962	tr|A0A0J5PMP0|A0A0J5PMP0_ASPFM	http://amigo.geneontology.org/cgi-bin/amigo/term_details?term=GO:1900741
regulation of pseudohyphal growth	Gene Ontology	GO:2000220	1	5	0.054299	0.210962	tr|A0A0J5SQG5|A0A0J5SQG5_ASPFM	http://amigo.geneontology.org/cgi-bin/amigo/term_details?term=GO:2000220
activating transcription factor binding	Gene Ontology	GO:0033613	1	5	0.054299	0.210962	tr|A0A0J5PMP0|A0A0J5PMP0_ASPFM	http://amigo.geneontology.org/cgi-bin/amigo/term_details?term=GO:0033613
positive regulation of proteasomal protein catabolic process	Gene Ontology	GO:1901800	1	5	0.054299	0.210962	tr|A0A0J5PUB3|A0A0J5PUB3_ASPFM	http://amigo.geneontology.org/cgi-bin/amigo/term_details?term=GO:1901800
oxidoreductase activity, acting on single donors with incorporation of molecular oxygen, incorporation of one atom of oxygen (internal monooxygenases or internal mixed function oxidases)	Gene Ontology	GO:0016703	1	5	0.054299	0.210962	tr|A0A0J5PVE0|A0A0J5PVE0_ASPFM	http://amigo.geneontology.org/cgi-bin/amigo/term_details?term=GO:0016703
NADH dehydrogenase (ubiquinone) activity	Gene Ontology	GO:0008137	1	5	0.054299	0.210962	tr|A0A0J5PEJ8|A0A0J5PEJ8_ASPFM	http://amigo.geneontology.org/cgi-bin/amigo/term_details?term=GO:0008137
nuclear-transcribed mRNA catabolic process, deadenylation-independent decay	Gene Ontology	GO:0031086	1	5	0.054299	0.210962	tr|A0A0J5SKW5|A0A0J5SKW5_ASPFM	http://amigo.geneontology.org/cgi-bin/amigo/term_details?term=GO:0031086
negative regulation of proteolysis	Gene Ontology	GO:0045861	1	5	0.054299	0.210962	tr|A0A0J5Q0U9|A0A0J5Q0U9_ASPFM	http://amigo.geneontology.org/cgi-bin/amigo/term_details?term=GO:0045861
ribosome	Gene Ontology	GO:0005840	4	150	0.0543834	0.210962	tr|A0A0J5PNA9|A0A0J5PNA9_ASPFM|tr|A0A0J5Q0I9|A0A0J5Q0I9_ASPFM|tr|A0A0J5PKY1|A0A0J5PKY1_ASPFM|tr|A0A0J5Q4L0|A0A0J5Q4L0_ASPFM	http://amigo.geneontology.org/cgi-bin/amigo/term_details?term=GO:0005840
inner mitochondrial membrane protein complex	Gene Ontology	GO:0098800	2	39	0.0550757	0.211801	tr|A0A0J5Q5A4|A0A0J5Q5A4_ASPFM|tr|A0A0J5PQL3|A0A0J5PQL3_ASPFM	http://amigo.geneontology.org/cgi-bin/amigo/term_details?term=GO:0098800
enzyme activator activity	Gene Ontology	GO:0008047	2	39	0.0550757	0.211801	tr|A0A0J5SKW5|A0A0J5SKW5_ASPFM|tr|A0A0J5PVS4|A0A0J5PVS4_ASPFM	http://amigo.geneontology.org/cgi-bin/amigo/term_details?term=GO:0008047
biological regulation	Gene Ontology	GO:0065007	15	1028	0.0550946	0.211801	tr|A0A0J5PV51|A0A0J5PV51_ASPFM|tr|A0A0J5SKW5|A0A0J5SKW5_ASPFM|tr|A0A0J5Q6M9|A0A0J5Q6M9_ASPFM|tr|A0A0J5PHI4|A0A0J5PHI4_ASPFM|tr|A0A0J5PKZ7|A0A0J5PKZ7_ASPFM|tr|A0A0J5Q1I3|A0A0J5Q1I3_ASPFM|tr|A0A0J5Q0U9|A0A0J5Q0U9_ASPFM|tr|A0A0J5SQG5|A0A0J5SQG5_ASPFM|tr|A0A0J5PUB3|A0A0J5PUB3_ASPFM|tr|A0A0J5PVE5|A0A0J5PVE5_ASPFM|tr|A0A0J5PRS9|A0A0J5PRS9_ASPFM|tr|A0A0J5PMP0|A0A0J5PMP0_ASPFM|tr|A0A0J5PUK7|A0A0J5PUK7_AS…	http://amigo.geneontology.org/cgi-bin/amigo/term_details?term=GO:0065007
positive regulation of nucleobase-containing compound metabolic process	Gene Ontology	GO:0045935	3	91	0.056358	0.214775	tr|A0A0J5SKW5|A0A0J5SKW5_ASPFM|tr|A0A0J5SQG5|A0A0J5SQG5_ASPFM|tr|A0A0J5PIQ5|A0A0J5PIQ5_ASPFM	http://amigo.geneontology.org/cgi-bin/amigo/term_details?term=GO:0045935
purine ribonucleotide biosynthetic process	Gene Ontology	GO:0009152	2	40	0.05749	0.214775	tr|A0A0J5PQL3|A0A0J5PQL3_ASPFM|tr|A0A0J5SQG5|A0A0J5SQG5_ASPFM	http://amigo.geneontology.org/cgi-bin/amigo/term_details?term=GO:0009152
pyridine nucleotide metabolic process	Gene Ontology	GO:0019362	2	40	0.05749	0.214775	tr|A0A0J5PRC9|A0A0J5PRC9_ASPFM|tr|A0A0J5PWF4|A0A0J5PWF4_ASPFM	http://amigo.geneontology.org/cgi-bin/amigo/term_details?term=GO:0019362
nicotinamide nucleotide metabolic process	Gene Ontology	GO:0046496	2	40	0.05749	0.214775	tr|A0A0J5PRC9|A0A0J5PRC9_ASPFM|tr|A0A0J5PWF4|A0A0J5PWF4_ASPFM	http://amigo.geneontology.org/cgi-bin/amigo/term_details?term=GO:0046496
asexual sporulation	Gene Ontology	GO:0030436	4	153	0.0575987	0.214775	tr|A0A0J5PKZ7|A0A0J5PKZ7_ASPFM|tr|A0A0J5SQG5|A0A0J5SQG5_ASPFM|tr|A0A0J5PMP0|A0A0J5PMP0_ASPFM|tr|A0A0J5SCF2|A0A0J5SCF2_ASPFM	http://amigo.geneontology.org/cgi-bin/amigo/term_details?term=GO:0030436
vesicle-mediated transport	Gene Ontology	GO:0016192	4	153	0.0575987	0.214775	tr|A0A0J5PRS9|A0A0J5PRS9_ASPFM|tr|A0A0J5PV51|A0A0J5PV51_ASPFM|tr|A0A0J5PZF9|A0A0J5PZF9_ASPFM|tr|A0A0J5PHI4|A0A0J5PHI4_ASPFM	http://amigo.geneontology.org/cgi-bin/amigo/term_details?term=GO:0016192
transmembrane transporter activity	Gene Ontology	GO:0022857	6	292	0.0578016	0.214775	tr|A0A0J5PTR2|A0A0J5PTR2_ASPFM|tr|A0A0J5Q2G5|A0A0J5Q2G5_ASPFM|tr|A0A0J5PN06|A0A0J5PN06_ASPFM|tr|A0A0J5PQL3|A0A0J5PQL3_ASPFM|tr|A0A0J5Q4T5|A0A0J5Q4T5_ASPFM|tr|A0A0J5Q3U7|A0A0J5Q3U7_ASPFM	http://amigo.geneontology.org/cgi-bin/amigo/term_details?term=GO:0022857
chromosome segregation	Gene Ontology	GO:0007059	3	92	0.0578195	0.214775	tr|A0A0J5PVE5|A0A0J5PVE5_ASPFM|tr|A0A0J5PMP0|A0A0J5PMP0_ASPFM|tr|A0A0J5Q6M9|A0A0J5Q6M9_ASPFM	http://amigo.geneontology.org/cgi-bin/amigo/term_details?term=GO:0007059
ribose phosphate metabolic process	Gene Ontology	GO:0019693	3	93	0.0592989	0.214775	tr|A0A0J5PQL3|A0A0J5PQL3_ASPFM|tr|A0A0J5PWF4|A0A0J5PWF4_ASPFM|tr|A0A0J5SQG5|A0A0J5SQG5_ASPFM	http://amigo.geneontology.org/cgi-bin/amigo/term_details?term=GO:0019693
positive regulation of cellular metabolic process	Gene Ontology	GO:0031325	4	155	0.059798	0.214775	tr|A0A0J5PUB3|A0A0J5PUB3_ASPFM|tr|A0A0J5SKW5|A0A0J5SKW5_ASPFM|tr|A0A0J5SQG5|A0A0J5SQG5_ASPFM|tr|A0A0J5PIQ5|A0A0J5PIQ5_ASPFM	http://amigo.geneontology.org/cgi-bin/amigo/term_details?term=GO:0031325
positive regulation of reproductive process	Gene Ontology	GO:2000243	2	41	0.0599406	0.214775	tr|A0A0J5PMP0|A0A0J5PMP0_ASPFM|tr|A0A0J5SQG5|A0A0J5SQG5_ASPFM	http://amigo.geneontology.org/cgi-bin/amigo/term_details?term=GO:2000243
maturation of SSU-rRNA	Gene Ontology	GO:0030490	2	41	0.0599406	0.214775	tr|A0A0J5PNE9|A0A0J5PNE9_ASPFM|tr|A0A0J5Q4L0|A0A0J5Q4L0_ASPFM	http://amigo.geneontology.org/cgi-bin/amigo/term_details?term=GO:0030490
hyphal tip	Gene Ontology	GO:0001411	2	41	0.0599406	0.214775	tr|A0A0J5PRS9|A0A0J5PRS9_ASPFM|tr|A0A0J5PV51|A0A0J5PV51_ASPFM	http://amigo.geneontology.org/cgi-bin/amigo/term_details?term=GO:0001411
purine nucleotide biosynthetic process	Gene Ontology	GO:0006164	2	41	0.0599406	0.214775	tr|A0A0J5PQL3|A0A0J5PQL3_ASPFM|tr|A0A0J5SQG5|A0A0J5SQG5_ASPFM	http://amigo.geneontology.org/cgi-bin/amigo/term_details?term=GO:0006164
negative regulation of biological process	Gene Ontology	GO:0048519	6	295	0.0601023	0.214775	tr|A0A0J5PUK7|A0A0J5PUK7_ASPFM|tr|A0A0J5PV51|A0A0J5PV51_ASPFM|tr|A0A0J5SQG5|A0A0J5SQG5_ASPFM|tr|A0A0J5Q0U9|A0A0J5Q0U9_ASPFM|tr|A0A0J5Q1I3|A0A0J5Q1I3_ASPFM|tr|A0A0J5PMP0|A0A0J5PMP0_ASPFM	http://amigo.geneontology.org/cgi-bin/amigo/term_details?term=GO:0048519
site of polarized growth	Gene Ontology	GO:0030427	3	95	0.062311	0.214775	tr|A0A0J5PRS9|A0A0J5PRS9_ASPFM|tr|A0A0J5PV51|A0A0J5PV51_ASPFM|tr|A0A0J5PHI4|A0A0J5PHI4_ASPFM	http://amigo.geneontology.org/cgi-bin/amigo/term_details?term=GO:0030427
spore germination	Gene Ontology	GO:0009847	2	42	0.0624268	0.214775	tr|A0A0J5PMP0|A0A0J5PMP0_ASPFM|tr|A0A0J5SQG5|A0A0J5SQG5_ASPFM	http://amigo.geneontology.org/cgi-bin/amigo/term_details?term=GO:0009847
sulfur compound binding	Gene Ontology	GO:1901681	1	6	0.0630609	0.214775	tr|A0A0J5PF72|A0A0J5PF72_ASPFM	http://amigo.geneontology.org/cgi-bin/amigo/term_details?term=GO:1901681
response to farnesol	Gene Ontology	GO:0097307	1	6	0.0630609	0.214775	tr|A0A0J5SQG5|A0A0J5SQG5_ASPFM	http://amigo.geneontology.org/cgi-bin/amigo/term_details?term=GO:0097307
mitotic cell cycle arrest	Gene Ontology	GO:0071850	1	6	0.0630609	0.214775	tr|A0A0J5SQG5|A0A0J5SQG5_ASPFM	http://amigo.geneontology.org/cgi-bin/amigo/term_details?term=GO:0071850
mitochondrial proton-transporting ATP synthase complex, coupling factor F(o)	Gene Ontology	GO:0000276	1	6	0.0630609	0.214775	tr|A0A0J5PQL3|A0A0J5PQL3_ASPFM	http://amigo.geneontology.org/cgi-bin/amigo/term_details?term=GO:0000276
cellular response to farnesol	Gene Ontology	GO:0097308	1	6	0.0630609	0.214775	tr|A0A0J5SQG5|A0A0J5SQG5_ASPFM	http://amigo.geneontology.org/cgi-bin/amigo/term_details?term=GO:0097308
protein phosphatase regulator activity	Gene Ontology	GO:0019888	1	6	0.0630609	0.214775	tr|A0A0J5PMP0|A0A0J5PMP0_ASPFM	http://amigo.geneontology.org/cgi-bin/amigo/term_details?term=GO:0019888
regulation of pheromone-dependent signal transduction involved in conjugation with cellular fusion	Gene Ontology	GO:0010969	1	6	0.0630609	0.214775	tr|A0A0J5SQG5|A0A0J5SQG5_ASPFM	http://amigo.geneontology.org/cgi-bin/amigo/term_details?term=GO:0010969
regulation of adenylate cyclase activity	Gene Ontology	GO:0045761	1	6	0.0630609	0.214775	tr|A0A0J5SQG5|A0A0J5SQG5_ASPFM	http://amigo.geneontology.org/cgi-bin/amigo/term_details?term=GO:0045761
positive regulation of growth of unicellular organism as a thread of attached cells	Gene Ontology	GO:0070786	1	6	0.0630609	0.214775	tr|A0A0J5SQG5|A0A0J5SQG5_ASPFM	http://amigo.geneontology.org/cgi-bin/amigo/term_details?term=GO:0070786
regulation of protein ubiquitination	Gene Ontology	GO:0031396	1	6	0.0630609	0.214775	tr|A0A0J5PMP0|A0A0J5PMP0_ASPFM	http://amigo.geneontology.org/cgi-bin/amigo/term_details?term=GO:0031396
carbon catabolite activation of transcription	Gene Ontology	GO:0045991	1	6	0.0630609	0.214775	tr|A0A0J5SQG5|A0A0J5SQG5_ASPFM	http://amigo.geneontology.org/cgi-bin/amigo/term_details?term=GO:0045991
regulation of cyclase activity	Gene Ontology	GO:0031279	1	6	0.0630609	0.214775	tr|A0A0J5SQG5|A0A0J5SQG5_ASPFM	http://amigo.geneontology.org/cgi-bin/amigo/term_details?term=GO:0031279
COPI vesicle coat	Gene Ontology	GO:0030126	1	6	0.0630609	0.214775	tr|A0A0J5PZF9|A0A0J5PZF9_ASPFM	http://amigo.geneontology.org/cgi-bin/amigo/term_details?term=GO:0030126
regulation of lyase activity	Gene Ontology	GO:0051339	1	6	0.0630609	0.214775	tr|A0A0J5SQG5|A0A0J5SQG5_ASPFM	http://amigo.geneontology.org/cgi-bin/amigo/term_details?term=GO:0051339
COPI-coated vesicle membrane	Gene Ontology	GO:0030663	1	6	0.0630609	0.214775	tr|A0A0J5PZF9|A0A0J5PZF9_ASPFM	http://amigo.geneontology.org/cgi-bin/amigo/term_details?term=GO:0030663
regulation of sequence-specific DNA binding transcription factor activity	Gene Ontology	GO:0051090	1	6	0.0630609	0.214775	tr|A0A0J5PMP0|A0A0J5PMP0_ASPFM	http://amigo.geneontology.org/cgi-bin/amigo/term_details?term=GO:0051090
ubiquitin protein ligase activity	Gene Ontology	GO:0061630	1	6	0.0630609	0.214775	tr|A0A0J5PDH8|A0A0J5PDH8_ASPFM	http://amigo.geneontology.org/cgi-bin/amigo/term_details?term=GO:0061630
regulation of cellular protein catabolic process	Gene Ontology	GO:1903362	1	6	0.0630609	0.214775	tr|A0A0J5PUB3|A0A0J5PUB3_ASPFM	http://amigo.geneontology.org/cgi-bin/amigo/term_details?term=GO:1903362
cofactor transporter activity	Gene Ontology	GO:0051184	1	6	0.0630609	0.214775	tr|A0A0J5Q4T5|A0A0J5Q4T5_ASPFM	http://amigo.geneontology.org/cgi-bin/amigo/term_details?term=GO:0051184
regulation of proteasomal protein catabolic process	Gene Ontology	GO:0061136	1	6	0.0630609	0.214775	tr|A0A0J5PUB3|A0A0J5PUB3_ASPFM	http://amigo.geneontology.org/cgi-bin/amigo/term_details?term=GO:0061136
cell growth mode switching, budding to filamentous	Gene Ontology	GO:0036187	1	6	0.0630609	0.214775	tr|A0A0J5PHI4|A0A0J5PHI4_ASPFM	http://amigo.geneontology.org/cgi-bin/amigo/term_details?term=GO:0036187
phosphatase regulator activity	Gene Ontology	GO:0019208	1	6	0.0630609	0.214775	tr|A0A0J5PMP0|A0A0J5PMP0_ASPFM	http://amigo.geneontology.org/cgi-bin/amigo/term_details?term=GO:0019208
protein deneddylation	Gene Ontology	GO:0000338	1	6	0.0630609	0.214775	tr|A0A0J5PVE5|A0A0J5PVE5_ASPFM	http://amigo.geneontology.org/cgi-bin/amigo/term_details?term=GO:0000338
regulation of proteolysis involved in cellular protein catabolic process	Gene Ontology	GO:1903050	1	6	0.0630609	0.214775	tr|A0A0J5PUB3|A0A0J5PUB3_ASPFM	http://amigo.geneontology.org/cgi-bin/amigo/term_details?term=GO:1903050
tyrosine metabolic process	Gene Ontology	GO:0006570	1	6	0.0630609	0.214775	tr|A0A0J5Q1H9|A0A0J5Q1H9_ASPFM	http://amigo.geneontology.org/cgi-bin/amigo/term_details?term=GO:0006570
cytoplasmic translational initiation	Gene Ontology	GO:0002183	1	6	0.0630609	0.214775	tr|A0A0J5PI11|A0A0J5PI11_ASPFM	http://amigo.geneontology.org/cgi-bin/amigo/term_details?term=GO:0002183
positive regulation of metabolic process	Gene Ontology	GO:0009893	4	159	0.06433	0.218518	tr|A0A0J5PUB3|A0A0J5PUB3_ASPFM|tr|A0A0J5SKW5|A0A0J5SKW5_ASPFM|tr|A0A0J5SQG5|A0A0J5SQG5_ASPFM|tr|A0A0J5PIQ5|A0A0J5PIQ5_ASPFM	http://amigo.geneontology.org/cgi-bin/amigo/term_details?term=GO:0009893
membrane part	Gene Ontology	GO:0044425	11	703	0.0647234	0.219274	tr|A0A0J5PTR2|A0A0J5PTR2_ASPFM|tr|A0A0J5Q5A4|A0A0J5Q5A4_ASPFM|tr|A0A0J5PQE4|A0A0J5PQE4_ASPFM|tr|A0A0J5PHI4|A0A0J5PHI4_ASPFM|tr|A0A0J5SQG5|A0A0J5SQG5_ASPFM|tr|A0A0J5PZF9|A0A0J5PZF9_ASPFM|tr|A0A0J5PQL3|A0A0J5PQL3_ASPFM|tr|A0A0J5Q2G5|A0A0J5Q2G5_ASPFM|tr|A0A0J5Q4T5|A0A0J5Q4T5_ASPFM|tr|A0A0J5PN06|A0A0J5PN06_ASPFM|tr|A0A0J5Q3U7|A0A0J5Q3U7_ASPFM	http://amigo.geneontology.org/cgi-bin/amigo/term_details?term=GO:0044425
monovalent inorganic cation transport	Gene Ontology	GO:0015672	2	43	0.0649477	0.219455	tr|A0A0J5Q4T5|A0A0J5Q4T5_ASPFM|tr|A0A0J5PQL3|A0A0J5PQL3_ASPFM	http://amigo.geneontology.org/cgi-bin/amigo/term_details?term=GO:0015672
ribonucleoprotein complex biogenesis	Gene Ontology	GO:0022613	4	161	0.0666622	0.223586	tr|A0A0J5PNE9|A0A0J5PNE9_ASPFM|tr|A0A0J5PKY1|A0A0J5PKY1_ASPFM|tr|A0A0J5Q4L0|A0A0J5Q4L0_ASPFM|tr|A0A0J5PIQ5|A0A0J5PIQ5_ASPFM	http://amigo.geneontology.org/cgi-bin/amigo/term_details?term=GO:0022613
cell growth	Gene Ontology	GO:0016049	2	44	0.0675024	0.223586	tr|A0A0J5PMP0|A0A0J5PMP0_ASPFM|tr|A0A0J5SQG5|A0A0J5SQG5_ASPFM	http://amigo.geneontology.org/cgi-bin/amigo/term_details?term=GO:0016049
positive regulation of multi-organism process	Gene Ontology	GO:0043902	2	44	0.0675024	0.223586	tr|A0A0J5PMP0|A0A0J5PMP0_ASPFM|tr|A0A0J5SQG5|A0A0J5SQG5_ASPFM	http://amigo.geneontology.org/cgi-bin/amigo/term_details?term=GO:0043902
ribonucleotide biosynthetic process	Gene Ontology	GO:0009260	2	44	0.0675024	0.223586	tr|A0A0J5PQL3|A0A0J5PQL3_ASPFM|tr|A0A0J5SQG5|A0A0J5SQG5_ASPFM	http://amigo.geneontology.org/cgi-bin/amigo/term_details?term=GO:0009260
positive regulation of organelle organization	Gene Ontology	GO:0010638	2	44	0.0675024	0.223586	tr|A0A0J5PVE5|A0A0J5PVE5_ASPFM|tr|A0A0J5Q6M9|A0A0J5Q6M9_ASPFM	http://amigo.geneontology.org/cgi-bin/amigo/term_details?term=GO:0010638
pyridine-containing compound metabolic process	Gene Ontology	GO:0072524	2	45	0.0700902	0.223586	tr|A0A0J5PRC9|A0A0J5PRC9_ASPFM|tr|A0A0J5PWF4|A0A0J5PWF4_ASPFM	http://amigo.geneontology.org/cgi-bin/amigo/term_details?term=GO:0072524
cellular developmental process	Gene Ontology	GO:0048869	5	234	0.0705602	0.223586	tr|A0A0J5PKZ7|A0A0J5PKZ7_ASPFM|tr|A0A0J5Q0U9|A0A0J5Q0U9_ASPFM|tr|A0A0J5SQG5|A0A0J5SQG5_ASPFM|tr|A0A0J5PMP0|A0A0J5PMP0_ASPFM|tr|A0A0J5Q1B9|A0A0J5Q1B9_ASPFM	http://amigo.geneontology.org/cgi-bin/amigo/term_details?term=GO:0048869
macromolecule catabolic process	Gene Ontology	GO:0009057	5	235	0.0715573	0.223586	tr|A0A0J5PUB3|A0A0J5PUB3_ASPFM|tr|A0A0J5Q2W2|A0A0J5Q2W2_ASPFM|tr|A0A0J5PVE5|A0A0J5PVE5_ASPFM|tr|A0A0J5PDH8|A0A0J5PDH8_ASPFM|tr|A0A0J5SKW5|A0A0J5SKW5_ASPFM	http://amigo.geneontology.org/cgi-bin/amigo/term_details?term=GO:0009057
macromolecular complex assembly	Gene Ontology	GO:0065003	5	235	0.0715573	0.223586	tr|A0A0J5PKZ7|A0A0J5PKZ7_ASPFM|tr|A0A0J5PUB3|A0A0J5PUB3_ASPFM|tr|A0A0J5Q2W2|A0A0J5Q2W2_ASPFM|tr|A0A0J5PKY1|A0A0J5PKY1_ASPFM|tr|A0A0J5PEJ8|A0A0J5PEJ8_ASPFM	http://amigo.geneontology.org/cgi-bin/amigo/term_details?term=GO:0065003
L-phenylalanine metabolic process	Gene Ontology	GO:0006558	1	7	0.0717425	0.223586	tr|A0A0J5Q1H9|A0A0J5Q1H9_ASPFM	http://amigo.geneontology.org/cgi-bin/amigo/term_details?term=GO:0006558
regulation of single-species biofilm formation on inanimate substrate	Gene Ontology	GO:1900231	1	7	0.0717425	0.223586	tr|A0A0J5SQG5|A0A0J5SQG5_ASPFM	http://amigo.geneontology.org/cgi-bin/amigo/term_details?term=GO:1900231
cytoplasmic mRNA processing body	Gene Ontology	GO:0000932	1	7	0.0717425	0.223586	tr|A0A0J5SKW5|A0A0J5SKW5_ASPFM	http://amigo.geneontology.org/cgi-bin/amigo/term_details?term=GO:0000932
positive regulation of protein catabolic process	Gene Ontology	GO:0045732	1	7	0.0717425	0.223586	tr|A0A0J5PUB3|A0A0J5PUB3_ASPFM	http://amigo.geneontology.org/cgi-bin/amigo/term_details?term=GO:0045732
ubiquitin-like protein ligase activity	Gene Ontology	GO:0061659	1	7	0.0717425	0.223586	tr|A0A0J5PDH8|A0A0J5PDH8_ASPFM	http://amigo.geneontology.org/cgi-bin/amigo/term_details?term=GO:0061659
positive regulation of septation initiation signaling	Gene Ontology	GO:0031031	1	7	0.0717425	0.223586	tr|A0A0J5PMP0|A0A0J5PMP0_ASPFM	http://amigo.geneontology.org/cgi-bin/amigo/term_details?term=GO:0031031
translation elongation factor activity	Gene Ontology	GO:0003746	1	7	0.0717425	0.223586	tr|A0A0J5PIQ5|A0A0J5PIQ5_ASPFM	http://amigo.geneontology.org/cgi-bin/amigo/term_details?term=GO:0003746
monocarboxylic acid transport	Gene Ontology	GO:0015718	1	7	0.0717425	0.223586	tr|A0A0J5PN06|A0A0J5PN06_ASPFM	http://amigo.geneontology.org/cgi-bin/amigo/term_details?term=GO:0015718
cellular response to glucose stimulus	Gene Ontology	GO:0071333	1	7	0.0717425	0.223586	tr|A0A0J5SQG5|A0A0J5SQG5_ASPFM	http://amigo.geneontology.org/cgi-bin/amigo/term_details?term=GO:0071333
peroxisome fission	Gene Ontology	GO:0016559	1	7	0.0717425	0.223586	tr|A0A0J5Q1B9|A0A0J5Q1B9_ASPFM	http://amigo.geneontology.org/cgi-bin/amigo/term_details?term=GO:0016559
cellular response to monosaccharide stimulus	Gene Ontology	GO:0071326	1	7	0.0717425	0.223586	tr|A0A0J5SQG5|A0A0J5SQG5_ASPFM	http://amigo.geneontology.org/cgi-bin/amigo/term_details?term=GO:0071326
racemase and epimerase activity	Gene Ontology	GO:0016854	1	7	0.0717425	0.223586	tr|A0A0J5SQA8|A0A0J5SQA8_ASPFM	http://amigo.geneontology.org/cgi-bin/amigo/term_details?term=GO:0016854
cellular response to alcohol	Gene Ontology	GO:0097306	1	7	0.0717425	0.223586	tr|A0A0J5SQG5|A0A0J5SQG5_ASPFM	http://amigo.geneontology.org/cgi-bin/amigo/term_details?term=GO:0097306
regulation of ATPase activity	Gene Ontology	GO:0043462	1	7	0.0717425	0.223586	tr|A0A0J5PKZ7|A0A0J5PKZ7_ASPFM	http://amigo.geneontology.org/cgi-bin/amigo/term_details?term=GO:0043462
proton-transporting ATP synthase complex, coupling factor F(o)	Gene Ontology	GO:0045263	1	7	0.0717425	0.223586	tr|A0A0J5PQL3|A0A0J5PQL3_ASPFM	http://amigo.geneontology.org/cgi-bin/amigo/term_details?term=GO:0045263
cellular response to hexose stimulus	Gene Ontology	GO:0071331	1	7	0.0717425	0.223586	tr|A0A0J5SQG5|A0A0J5SQG5_ASPFM	http://amigo.geneontology.org/cgi-bin/amigo/term_details?term=GO:0071331
COP9 signalosome	Gene Ontology	GO:0008180	1	7	0.0717425	0.223586	tr|A0A0J5PVE5|A0A0J5PVE5_ASPFM	http://amigo.geneontology.org/cgi-bin/amigo/term_details?term=GO:0008180
chlamydospore formation	Gene Ontology	GO:0001410	1	7	0.0717425	0.223586	tr|A0A0J5PMP0|A0A0J5PMP0_ASPFM	http://amigo.geneontology.org/cgi-bin/amigo/term_details?term=GO:0001410
spindle midzone	Gene Ontology	GO:0051233	1	7	0.0717425	0.223586	tr|A0A0J5PMP0|A0A0J5PMP0_ASPFM	http://amigo.geneontology.org/cgi-bin/amigo/term_details?term=GO:0051233
snoRNA binding	Gene Ontology	GO:0030515	1	7	0.0717425	0.223586	tr|A0A0J5PNE9|A0A0J5PNE9_ASPFM	http://amigo.geneontology.org/cgi-bin/amigo/term_details?term=GO:0030515
cellular response to carbohydrate stimulus	Gene Ontology	GO:0071322	1	7	0.0717425	0.223586	tr|A0A0J5SQG5|A0A0J5SQG5_ASPFM	http://amigo.geneontology.org/cgi-bin/amigo/term_details?term=GO:0071322
oxidoreductase activity, acting on NAD(P)H, quinone or similar compound as acceptor	Gene Ontology	GO:0016655	1	7	0.0717425	0.223586	tr|A0A0J5PEJ8|A0A0J5PEJ8_ASPFM	http://amigo.geneontology.org/cgi-bin/amigo/term_details?term=GO:0016655
cell-abiotic substrate adhesion	Gene Ontology	GO:0036164	1	7	0.0717425	0.223586	tr|A0A0J5SQG5|A0A0J5SQG5_ASPFM	http://amigo.geneontology.org/cgi-bin/amigo/term_details?term=GO:0036164
nucleobase-containing small molecule metabolic process	Gene Ontology	GO:0055086	4	166	0.0726839	0.224423	tr|A0A0J5PRC9|A0A0J5PRC9_ASPFM|tr|A0A0J5PQL3|A0A0J5PQL3_ASPFM|tr|A0A0J5PWF4|A0A0J5PWF4_ASPFM|tr|A0A0J5SQG5|A0A0J5SQG5_ASPFM	http://amigo.geneontology.org/cgi-bin/amigo/term_details?term=GO:0055086
organelle outer membrane	Gene Ontology	GO:0031968	2	46	0.0727101	0.224423	tr|A0A0J5PV51|A0A0J5PV51_ASPFM|tr|A0A0J5Q1B9|A0A0J5Q1B9_ASPFM	http://amigo.geneontology.org/cgi-bin/amigo/term_details?term=GO:0031968
mitochondrial outer membrane	Gene Ontology	GO:0005741	2	46	0.0727101	0.224423	tr|A0A0J5PV51|A0A0J5PV51_ASPFM|tr|A0A0J5Q1B9|A0A0J5Q1B9_ASPFM	http://amigo.geneontology.org/cgi-bin/amigo/term_details?term=GO:0005741
phospholipid biosynthetic process	Gene Ontology	GO:0008654	2	46	0.0727101	0.224423	tr|A0A0J5PUK7|A0A0J5PUK7_ASPFM|tr|A0A0J5Q6L6|A0A0J5Q6L6_ASPFM	http://amigo.geneontology.org/cgi-bin/amigo/term_details?term=GO:0008654
nitrogen compound transport	Gene Ontology	GO:0071705	3	103	0.0750524	0.22739	tr|A0A0J5PN06|A0A0J5PN06_ASPFM|tr|A0A0J5Q4T5|A0A0J5Q4T5_ASPFM|tr|A0A0J5PHI4|A0A0J5PHI4_ASPFM	http://amigo.geneontology.org/cgi-bin/amigo/term_details?term=GO:0071705
Golgi apparatus	Gene Ontology	GO:0005794	4	168	0.0751683	0.22739	tr|A0A0J5PV51|A0A0J5PV51_ASPFM|tr|A0A0J5PN06|A0A0J5PN06_ASPFM|tr|A0A0J5PZF9|A0A0J5PZF9_ASPFM|tr|A0A0J5Q4T5|A0A0J5Q4T5_ASPFM	http://amigo.geneontology.org/cgi-bin/amigo/term_details?term=GO:0005794
ribose phosphate biosynthetic process	Gene Ontology	GO:0046390	2	47	0.0753614	0.22739	tr|A0A0J5PQL3|A0A0J5PQL3_ASPFM|tr|A0A0J5SQG5|A0A0J5SQG5_ASPFM	http://amigo.geneontology.org/cgi-bin/amigo/term_details?term=GO:0046390
asexual reproduction	Gene Ontology	GO:0019954	4	169	0.0764266	0.22739	tr|A0A0J5PKZ7|A0A0J5PKZ7_ASPFM|tr|A0A0J5SQG5|A0A0J5SQG5_ASPFM|tr|A0A0J5PMP0|A0A0J5PMP0_ASPFM|tr|A0A0J5SCF2|A0A0J5SCF2_ASPFM	http://amigo.geneontology.org/cgi-bin/amigo/term_details?term=GO:0019954
ATPase activity	Gene Ontology	GO:0016887	4	169	0.0764266	0.22739	tr|A0A0J5PKZ7|A0A0J5PKZ7_ASPFM|tr|A0A0J5Q3U7|A0A0J5Q3U7_ASPFM|tr|A0A0J5PQL3|A0A0J5PQL3_ASPFM|tr|A0A0J5STT4|A0A0J5STT4_ASPFM	http://amigo.geneontology.org/cgi-bin/amigo/term_details?term=GO:0016887
carbohydrate derivative metabolic process	Gene Ontology	GO:1901135	5	242	0.0787554	0.22739	tr|A0A0J5PQL3|A0A0J5PQL3_ASPFM|tr|A0A0J5PWF4|A0A0J5PWF4_ASPFM|tr|A0A0J5SQG5|A0A0J5SQG5_ASPFM|tr|A0A0J5PMP0|A0A0J5PMP0_ASPFM|tr|A0A0J5SQA8|A0A0J5SQA8_ASPFM	http://amigo.geneontology.org/cgi-bin/amigo/term_details?term=GO:1901135
regulation of purine nucleotide biosynthetic process	Gene Ontology	GO:1900371	1	8	0.0803445	0.22739	tr|A0A0J5SQG5|A0A0J5SQG5_ASPFM	http://amigo.geneontology.org/cgi-bin/amigo/term_details?term=GO:1900371
cell cycle arrest	Gene Ontology	GO:0007050	1	8	0.0803445	0.22739	tr|A0A0J5SQG5|A0A0J5SQG5_ASPFM	http://amigo.geneontology.org/cgi-bin/amigo/term_details?term=GO:0007050
RNA polymerase II transcription factor binding	Gene Ontology	GO:0001085	1	8	0.0803445	0.22739	tr|A0A0J5PMP0|A0A0J5PMP0_ASPFM	http://amigo.geneontology.org/cgi-bin/amigo/term_details?term=GO:0001085
positive regulation of small GTPase mediated signal transduction	Gene Ontology	GO:0051057	1	8	0.0803445	0.22739	tr|A0A0J5PMP0|A0A0J5PMP0_ASPFM	http://amigo.geneontology.org/cgi-bin/amigo/term_details?term=GO:0051057
cellular response to lipid	Gene Ontology	GO:0071396	1	8	0.0803445	0.22739	tr|A0A0J5SQG5|A0A0J5SQG5_ASPFM	http://amigo.geneontology.org/cgi-bin/amigo/term_details?term=GO:0071396
positive regulation of barrier septum assembly	Gene Ontology	GO:0010973	1	8	0.0803445	0.22739	tr|A0A0J5PMP0|A0A0J5PMP0_ASPFM	http://amigo.geneontology.org/cgi-bin/amigo/term_details?term=GO:0010973
avoidance of host defenses	Gene Ontology	GO:0044413	1	8	0.0803445	0.22739	tr|A0A0J5SQG5|A0A0J5SQG5_ASPFM	http://amigo.geneontology.org/cgi-bin/amigo/term_details?term=GO:0044413
regulation of protein complex disassembly	Gene Ontology	GO:0043244	1	8	0.0803445	0.22739	tr|A0A0J5PIQ5|A0A0J5PIQ5_ASPFM	http://amigo.geneontology.org/cgi-bin/amigo/term_details?term=GO:0043244
protein domain specific binding	Gene Ontology	GO:0019904	1	8	0.0803445	0.22739	tr|A0A0J5PMP0|A0A0J5PMP0_ASPFM	http://amigo.geneontology.org/cgi-bin/amigo/term_details?term=GO:0019904
vesicle-mediated transport to the plasma membrane	Gene Ontology	GO:0098876	1	8	0.0803445	0.22739	tr|A0A0J5PRS9|A0A0J5PRS9_ASPFM	http://amigo.geneontology.org/cgi-bin/amigo/term_details?term=GO:0098876
Golgi to plasma membrane transport	Gene Ontology	GO:0006893	1	8	0.0803445	0.22739	tr|A0A0J5PRS9|A0A0J5PRS9_ASPFM	http://amigo.geneontology.org/cgi-bin/amigo/term_details?term=GO:0006893
regulation of cAMP biosynthetic process	Gene Ontology	GO:0030817	1	8	0.0803445	0.22739	tr|A0A0J5SQG5|A0A0J5SQG5_ASPFM	http://amigo.geneontology.org/cgi-bin/amigo/term_details?term=GO:0030817
eukaryotic translation initiation factor 3 complex, eIF3e	Gene Ontology	GO:0071540	1	8	0.0803445	0.22739	tr|A0A0J5PUB3|A0A0J5PUB3_ASPFM	http://amigo.geneontology.org/cgi-bin/amigo/term_details?term=GO:0071540
regulation of cyclic nucleotide biosynthetic process	Gene Ontology	GO:0030802	1	8	0.0803445	0.22739	tr|A0A0J5SQG5|A0A0J5SQG5_ASPFM	http://amigo.geneontology.org/cgi-bin/amigo/term_details?term=GO:0030802
arginine biosynthetic process	Gene Ontology	GO:0006526	1	8	0.0803445	0.22739	tr|A0A0J5SCF2|A0A0J5SCF2_ASPFM	http://amigo.geneontology.org/cgi-bin/amigo/term_details?term=GO:0006526
galactose metabolic process	Gene Ontology	GO:0006012	1	8	0.0803445	0.22739	tr|A0A0J5SQA8|A0A0J5SQA8_ASPFM	http://amigo.geneontology.org/cgi-bin/amigo/term_details?term=GO:0006012
cell wall chitin biosynthetic process	Gene Ontology	GO:0006038	1	8	0.0803445	0.22739	tr|A0A0J5PMP0|A0A0J5PMP0_ASPFM	http://amigo.geneontology.org/cgi-bin/amigo/term_details?term=GO:0006038
regulation of signal transduction involved in conjugation with cellular fusion	Gene Ontology	GO:0060238	1	8	0.0803445	0.22739	tr|A0A0J5SQG5|A0A0J5SQG5_ASPFM	http://amigo.geneontology.org/cgi-bin/amigo/term_details?term=GO:0060238
negative regulation of transferase activity	Gene Ontology	GO:0051348	1	8	0.0803445	0.22739	tr|A0A0J5PMP0|A0A0J5PMP0_ASPFM	http://amigo.geneontology.org/cgi-bin/amigo/term_details?term=GO:0051348
positive regulation of Ras protein signal transduction	Gene Ontology	GO:0046579	1	8	0.0803445	0.22739	tr|A0A0J5PMP0|A0A0J5PMP0_ASPFM	http://amigo.geneontology.org/cgi-bin/amigo/term_details?term=GO:0046579
regulation of protein modification by small protein conjugation or removal	Gene Ontology	GO:1903320	1	8	0.0803445	0.22739	tr|A0A0J5PMP0|A0A0J5PMP0_ASPFM	http://amigo.geneontology.org/cgi-bin/amigo/term_details?term=GO:1903320
response to alcohol	Gene Ontology	GO:0097305	1	8	0.0803445	0.22739	tr|A0A0J5SQG5|A0A0J5SQG5_ASPFM	http://amigo.geneontology.org/cgi-bin/amigo/term_details?term=GO:0097305
regulation of G-protein coupled receptor protein signaling pathway	Gene Ontology	GO:0008277	1	8	0.0803445	0.22739	tr|A0A0J5SQG5|A0A0J5SQG5_ASPFM	http://amigo.geneontology.org/cgi-bin/amigo/term_details?term=GO:0008277
response to glucose	Gene Ontology	GO:0009749	1	8	0.0803445	0.22739	tr|A0A0J5SQG5|A0A0J5SQG5_ASPFM	http://amigo.geneontology.org/cgi-bin/amigo/term_details?term=GO:0009749
positive regulation of proteolysis	Gene Ontology	GO:0045862	1	8	0.0803445	0.22739	tr|A0A0J5PUB3|A0A0J5PUB3_ASPFM	http://amigo.geneontology.org/cgi-bin/amigo/term_details?term=GO:0045862
organophosphate ester transmembrane transporter activity	Gene Ontology	GO:0015605	1	8	0.0803445	0.22739	tr|A0A0J5Q2G5|A0A0J5Q2G5_ASPFM	http://amigo.geneontology.org/cgi-bin/amigo/term_details?term=GO:0015605
regulation of nucleotide biosynthetic process	Gene Ontology	GO:0030808	1	8	0.0803445	0.22739	tr|A0A0J5SQG5|A0A0J5SQG5_ASPFM	http://amigo.geneontology.org/cgi-bin/amigo/term_details?term=GO:0030808
Ran GTPase binding	Gene Ontology	GO:0008536	1	8	0.0803445	0.22739	tr|A0A0J5PH08|A0A0J5PH08_ASPFM	http://amigo.geneontology.org/cgi-bin/amigo/term_details?term=GO:0008536
response to lipid	Gene Ontology	GO:0033993	1	8	0.0803445	0.22739	tr|A0A0J5SQG5|A0A0J5SQG5_ASPFM	http://amigo.geneontology.org/cgi-bin/amigo/term_details?term=GO:0033993
barrier septum	Gene Ontology	GO:0000935	1	8	0.0803445	0.22739	tr|A0A0J5SQG5|A0A0J5SQG5_ASPFM	http://amigo.geneontology.org/cgi-bin/amigo/term_details?term=GO:0000935
anatomical structure development	Gene Ontology	GO:0048856	6	319	0.0804686	0.22739	tr|A0A0J5PKZ7|A0A0J5PKZ7_ASPFM|tr|A0A0J5Q0U9|A0A0J5Q0U9_ASPFM|tr|A0A0J5SQG5|A0A0J5SQG5_ASPFM|tr|A0A0J5Q1H9|A0A0J5Q1H9_ASPFM|tr|A0A0J5PRS9|A0A0J5PRS9_ASPFM|tr|A0A0J5PMP0|A0A0J5PMP0_ASPFM	http://amigo.geneontology.org/cgi-bin/amigo/term_details?term=GO:0048856
purine-containing compound biosynthetic process	Gene Ontology	GO:0072522	2	49	0.0807551	0.22739	tr|A0A0J5PQL3|A0A0J5PQL3_ASPFM|tr|A0A0J5SQG5|A0A0J5SQG5_ASPFM	http://amigo.geneontology.org/cgi-bin/amigo/term_details?term=GO:0072522
outer membrane	Gene Ontology	GO:0019867	2	49	0.0807551	0.22739	tr|A0A0J5PV51|A0A0J5PV51_ASPFM|tr|A0A0J5Q1B9|A0A0J5Q1B9_ASPFM	http://amigo.geneontology.org/cgi-bin/amigo/term_details?term=GO:0019867
ribosomal small subunit biogenesis	Gene Ontology	GO:0042274	2	50	0.083496	0.230518	tr|A0A0J5PNE9|A0A0J5PNE9_ASPFM|tr|A0A0J5Q4L0|A0A0J5Q4L0_ASPFM	http://amigo.geneontology.org/cgi-bin/amigo/term_details?term=GO:0042274
single organism signaling	Gene Ontology	GO:0044700	4	175	0.0841989	0.230518	tr|A0A0J5PRS9|A0A0J5PRS9_ASPFM|tr|A0A0J5PV51|A0A0J5PV51_ASPFM|tr|A0A0J5PMP0|A0A0J5PMP0_ASPFM|tr|A0A0J5SQG5|A0A0J5SQG5_ASPFM	http://amigo.geneontology.org/cgi-bin/amigo/term_details?term=GO:0044700
signal transduction	Gene Ontology	GO:0007165	4	175	0.0841989	0.230518	tr|A0A0J5PRS9|A0A0J5PRS9_ASPFM|tr|A0A0J5PV51|A0A0J5PV51_ASPFM|tr|A0A0J5PMP0|A0A0J5PMP0_ASPFM|tr|A0A0J5SQG5|A0A0J5SQG5_ASPFM	http://amigo.geneontology.org/cgi-bin/amigo/term_details?term=GO:0007165
signaling	Gene Ontology	GO:0023052	4	175	0.0841989	0.230518	tr|A0A0J5PRS9|A0A0J5PRS9_ASPFM|tr|A0A0J5PV51|A0A0J5PV51_ASPFM|tr|A0A0J5PMP0|A0A0J5PMP0_ASPFM|tr|A0A0J5SQG5|A0A0J5SQG5_ASPFM	http://amigo.geneontology.org/cgi-bin/amigo/term_details?term=GO:0023052
regulation of biological process	Gene Ontology	GO:0050789	13	915	0.084919	0.230518	tr|A0A0J5SKW5|A0A0J5SKW5_ASPFM|tr|A0A0J5Q6M9|A0A0J5Q6M9_ASPFM|tr|A0A0J5PHI4|A0A0J5PHI4_ASPFM|tr|A0A0J5PVE5|A0A0J5PVE5_ASPFM|tr|A0A0J5Q1I3|A0A0J5Q1I3_ASPFM|tr|A0A0J5Q0U9|A0A0J5Q0U9_ASPFM|tr|A0A0J5SQG5|A0A0J5SQG5_ASPFM|tr|A0A0J5PUB3|A0A0J5PUB3_ASPFM|tr|A0A0J5PV51|A0A0J5PV51_ASPFM|tr|A0A0J5PRS9|A0A0J5PRS9_ASPFM|tr|A0A0J5PMP0|A0A0J5PMP0_ASPFM|tr|A0A0J5PUK7|A0A0J5PUK7_ASPFM|tr|A0A0J5PIQ5|A0A0J5PIQ5_AS…	http://amigo.geneontology.org/cgi-bin/amigo/term_details?term=GO:0050789
active transmembrane transporter activity	Gene Ontology	GO:0022804	3	110	0.0870711	0.230518	tr|A0A0J5Q3U7|A0A0J5Q3U7_ASPFM|tr|A0A0J5Q4T5|A0A0J5Q4T5_ASPFM|tr|A0A0J5PQL3|A0A0J5PQL3_ASPFM	http://amigo.geneontology.org/cgi-bin/amigo/term_details?term=GO:0022804
positive regulation of nitrogen compound metabolic process	Gene Ontology	GO:0051173	3	111	0.0888513	0.230518	tr|A0A0J5SKW5|A0A0J5SKW5_ASPFM|tr|A0A0J5SQG5|A0A0J5SQG5_ASPFM|tr|A0A0J5PIQ5|A0A0J5PIQ5_ASPFM	http://amigo.geneontology.org/cgi-bin/amigo/term_details?term=GO:0051173
mitochondrial respiratory chain complex I assembly	Gene Ontology	GO:0032981	1	9	0.0888678	0.230518	tr|A0A0J5PEJ8|A0A0J5PEJ8_ASPFM	http://amigo.geneontology.org/cgi-bin/amigo/term_details?term=GO:0032981
regulation of cAMP metabolic process	Gene Ontology	GO:0030814	1	9	0.0888678	0.230518	tr|A0A0J5SQG5|A0A0J5SQG5_ASPFM	http://amigo.geneontology.org/cgi-bin/amigo/term_details?term=GO:0030814
proteasomal ubiquitin-independent protein catabolic process	Gene Ontology	GO:0010499	1	9	0.0888678	0.230518	tr|A0A0J5Q2W2|A0A0J5Q2W2_ASPFM	http://amigo.geneontology.org/cgi-bin/amigo/term_details?term=GO:0010499
nuclear-transcribed mRNA catabolic process, deadenylation-dependent decay	Gene Ontology	GO:0000288	1	9	0.0888678	0.230518	tr|A0A0J5SKW5|A0A0J5SKW5_ASPFM	http://amigo.geneontology.org/cgi-bin/amigo/term_details?term=GO:0000288
response to hexose	Gene Ontology	GO:0009746	1	9	0.0888678	0.230518	tr|A0A0J5SQG5|A0A0J5SQG5_ASPFM	http://amigo.geneontology.org/cgi-bin/amigo/term_details?term=GO:0009746
chronological cell aging	Gene Ontology	GO:0001300	1	9	0.0888678	0.230518	tr|A0A0J5Q1B9|A0A0J5Q1B9_ASPFM	http://amigo.geneontology.org/cgi-bin/amigo/term_details?term=GO:0001300
DNA replication origin binding	Gene Ontology	GO:0003688	1	9	0.0888678	0.230518	tr|A0A0J5PMP0|A0A0J5PMP0_ASPFM	http://amigo.geneontology.org/cgi-bin/amigo/term_details?term=GO:0003688
glucosamine-containing compound biosynthetic process	Gene Ontology	GO:1901073	1	9	0.0888678	0.230518	tr|A0A0J5PMP0|A0A0J5PMP0_ASPFM	http://amigo.geneontology.org/cgi-bin/amigo/term_details?term=GO:1901073
mitochondrial respiratory chain complex I biogenesis	Gene Ontology	GO:0097031	1	9	0.0888678	0.230518	tr|A0A0J5PEJ8|A0A0J5PEJ8_ASPFM	http://amigo.geneontology.org/cgi-bin/amigo/term_details?term=GO:0097031
cyclic nucleotide biosynthetic process	Gene Ontology	GO:0009190	1	9	0.0888678	0.230518	tr|A0A0J5SQG5|A0A0J5SQG5_ASPFM	http://amigo.geneontology.org/cgi-bin/amigo/term_details?term=GO:0009190
threonine-type endopeptidase activity	Gene Ontology	GO:0004298	1	9	0.0888678	0.230518	tr|A0A0J5Q2W2|A0A0J5Q2W2_ASPFM	http://amigo.geneontology.org/cgi-bin/amigo/term_details?term=GO:0004298
response to monosaccharide	Gene Ontology	GO:0034284	1	9	0.0888678	0.230518	tr|A0A0J5SQG5|A0A0J5SQG5_ASPFM	http://amigo.geneontology.org/cgi-bin/amigo/term_details?term=GO:0034284
aminoglycan biosynthetic process	Gene Ontology	GO:0006023	1	9	0.0888678	0.230518	tr|A0A0J5PMP0|A0A0J5PMP0_ASPFM	http://amigo.geneontology.org/cgi-bin/amigo/term_details?term=GO:0006023
vesicle fusion	Gene Ontology	GO:0006906	1	9	0.0888678	0.230518	tr|A0A0J5PRS9|A0A0J5PRS9_ASPFM	http://amigo.geneontology.org/cgi-bin/amigo/term_details?term=GO:0006906
avoidance of defenses of other organism involved in symbiotic interaction	Gene Ontology	GO:0051832	1	9	0.0888678	0.230518	tr|A0A0J5SQG5|A0A0J5SQG5_ASPFM	http://amigo.geneontology.org/cgi-bin/amigo/term_details?term=GO:0051832
translational termination	Gene Ontology	GO:0006415	1	9	0.0888678	0.230518	tr|A0A0J5PIQ5|A0A0J5PIQ5_ASPFM	http://amigo.geneontology.org/cgi-bin/amigo/term_details?term=GO:0006415
amino acid import	Gene Ontology	GO:0043090	1	9	0.0888678	0.230518	tr|A0A0J5PHI4|A0A0J5PHI4_ASPFM	http://amigo.geneontology.org/cgi-bin/amigo/term_details?term=GO:0043090
mitochondrion inheritance	Gene Ontology	GO:0000001	1	9	0.0888678	0.230518	tr|A0A0J5Q0U9|A0A0J5Q0U9_ASPFM	http://amigo.geneontology.org/cgi-bin/amigo/term_details?term=GO:0000001
superoxide metabolic process	Gene Ontology	GO:0006801	1	9	0.0888678	0.230518	tr|A0A0J5SQG5|A0A0J5SQG5_ASPFM	http://amigo.geneontology.org/cgi-bin/amigo/term_details?term=GO:0006801
organic anion transmembrane transporter activity	Gene Ontology	GO:0008514	1	9	0.0888678	0.230518	tr|A0A0J5PN06|A0A0J5PN06_ASPFM	http://amigo.geneontology.org/cgi-bin/amigo/term_details?term=GO:0008514
regulation of cyclic nucleotide metabolic process	Gene Ontology	GO:0030799	1	9	0.0888678	0.230518	tr|A0A0J5SQG5|A0A0J5SQG5_ASPFM	http://amigo.geneontology.org/cgi-bin/amigo/term_details?term=GO:0030799
cyclic purine nucleotide metabolic process	Gene Ontology	GO:0052652	1	9	0.0888678	0.230518	tr|A0A0J5SQG5|A0A0J5SQG5_ASPFM	http://amigo.geneontology.org/cgi-bin/amigo/term_details?term=GO:0052652
threonine-type peptidase activity	Gene Ontology	GO:0070003	1	9	0.0888678	0.230518	tr|A0A0J5Q2W2|A0A0J5Q2W2_ASPFM	http://amigo.geneontology.org/cgi-bin/amigo/term_details?term=GO:0070003
cAMP biosynthetic process	Gene Ontology	GO:0006171	1	9	0.0888678	0.230518	tr|A0A0J5SQG5|A0A0J5SQG5_ASPFM	http://amigo.geneontology.org/cgi-bin/amigo/term_details?term=GO:0006171
cAMP-mediated signaling	Gene Ontology	GO:0019933	1	9	0.0888678	0.230518	tr|A0A0J5SQG5|A0A0J5SQG5_ASPFM	http://amigo.geneontology.org/cgi-bin/amigo/term_details?term=GO:0019933
chitin biosynthetic process	Gene Ontology	GO:0006031	1	9	0.0888678	0.230518	tr|A0A0J5PMP0|A0A0J5PMP0_ASPFM	http://amigo.geneontology.org/cgi-bin/amigo/term_details?term=GO:0006031
cyclic-nucleotide-mediated signaling	Gene Ontology	GO:0019935	1	9	0.0888678	0.230518	tr|A0A0J5SQG5|A0A0J5SQG5_ASPFM	http://amigo.geneontology.org/cgi-bin/amigo/term_details?term=GO:0019935
NADH dehydrogenase complex assembly	Gene Ontology	GO:0010257	1	9	0.0888678	0.230518	tr|A0A0J5PEJ8|A0A0J5PEJ8_ASPFM	http://amigo.geneontology.org/cgi-bin/amigo/term_details?term=GO:0010257
regulation of nucleotide metabolic process	Gene Ontology	GO:0006140	1	9	0.0888678	0.230518	tr|A0A0J5SQG5|A0A0J5SQG5_ASPFM	http://amigo.geneontology.org/cgi-bin/amigo/term_details?term=GO:0006140
protein localization to plasma membrane	Gene Ontology	GO:0072659	1	9	0.0888678	0.230518	tr|A0A0J5SQG5|A0A0J5SQG5_ASPFM	http://amigo.geneontology.org/cgi-bin/amigo/term_details?term=GO:0072659
regulation of purine nucleotide metabolic process	Gene Ontology	GO:1900542	1	9	0.0888678	0.230518	tr|A0A0J5SQG5|A0A0J5SQG5_ASPFM	http://amigo.geneontology.org/cgi-bin/amigo/term_details?term=GO:1900542
oxidoreduction coenzyme metabolic process	Gene Ontology	GO:0006733	2	52	0.0890618	0.230555	tr|A0A0J5PRC9|A0A0J5PRC9_ASPFM|tr|A0A0J5PWF4|A0A0J5PWF4_ASPFM	http://amigo.geneontology.org/cgi-bin/amigo/term_details?term=GO:0006733
regulation of cellular process	Gene Ontology	GO:0050794	12	836	0.0907175	0.234369	tr|A0A0J5SKW5|A0A0J5SKW5_ASPFM|tr|A0A0J5PUK7|A0A0J5PUK7_ASPFM|tr|A0A0J5Q6M9|A0A0J5Q6M9_ASPFM|tr|A0A0J5PVE5|A0A0J5PVE5_ASPFM|tr|A0A0J5Q1I3|A0A0J5Q1I3_ASPFM|tr|A0A0J5Q0U9|A0A0J5Q0U9_ASPFM|tr|A0A0J5SQG5|A0A0J5SQG5_ASPFM|tr|A0A0J5PUB3|A0A0J5PUB3_ASPFM|tr|A0A0J5PV51|A0A0J5PV51_ASPFM|tr|A0A0J5PRS9|A0A0J5PRS9_ASPFM|tr|A0A0J5PMP0|A0A0J5PMP0_ASPFM|tr|A0A0J5PIQ5|A0A0J5PIQ5_ASPFM	http://amigo.geneontology.org/cgi-bin/amigo/term_details?term=GO:0050794
cellular component assembly	Gene Ontology	GO:0022607	6	332	0.0929475	0.239648	tr|A0A0J5PEJ8|A0A0J5PEJ8_ASPFM|tr|A0A0J5PKY1|A0A0J5PKY1_ASPFM|tr|A0A0J5PKZ7|A0A0J5PKZ7_ASPFM|tr|A0A0J5PUB3|A0A0J5PUB3_ASPFM|tr|A0A0J5Q2W2|A0A0J5Q2W2_ASPFM|tr|A0A0J5PMP0|A0A0J5PMP0_ASPFM	http://amigo.geneontology.org/cgi-bin/amigo/term_details?term=GO:0022607
sexual sporulation resulting in formation of a cellular spore	Gene Ontology	GO:0043935	3	114	0.0942837	0.239827	tr|A0A0J5PKZ7|A0A0J5PKZ7_ASPFM|tr|A0A0J5PMP0|A0A0J5PMP0_ASPFM|tr|A0A0J5SQG5|A0A0J5SQG5_ASPFM	http://amigo.geneontology.org/cgi-bin/amigo/term_details?term=GO:0043935
sexual sporulation	Gene Ontology	GO:0034293	3	114	0.0942837	0.239827	tr|A0A0J5PKZ7|A0A0J5PKZ7_ASPFM|tr|A0A0J5PMP0|A0A0J5PMP0_ASPFM|tr|A0A0J5SQG5|A0A0J5SQG5_ASPFM	http://amigo.geneontology.org/cgi-bin/amigo/term_details?term=GO:0034293
primary metabolic process	Gene Ontology	GO:0044238	26	2162	0.0943654	0.239827	tr|A0A0J5SQA8|A0A0J5SQA8_ASPFM|tr|A0A0J5Q2W2|A0A0J5Q2W2_ASPFM|tr|A0A0J5PQL3|A0A0J5PQL3_ASPFM|tr|A0A0J5PRM9|A0A0J5PRM9_ASPFM|tr|A0A0J5PWF4|A0A0J5PWF4_ASPFM|tr|A0A0J5PUK7|A0A0J5PUK7_ASPFM|tr|A0A0J5PVE5|A0A0J5PVE5_ASPFM|tr|A0A0J5PNA9|A0A0J5PNA9_ASPFM|tr|A0A0J5Q4L0|A0A0J5Q4L0_ASPFM|tr|A0A0J5PRC9|A0A0J5PRC9_ASPFM|tr|A0A0J5PDH8|A0A0J5PDH8_ASPFM|tr|A0A0J5PKY1|A0A0J5PKY1_ASPFM|tr|A0A0J5SQG5|A0A0J5SQG5_AS…	http://amigo.geneontology.org/cgi-bin/amigo/term_details?term=GO:0044238
asexual sporulation resulting in formation of a cellular spore	Gene Ontology	GO:0043936	2	54	0.094735	0.239827	tr|A0A0J5PMP0|A0A0J5PMP0_ASPFM|tr|A0A0J5SQG5|A0A0J5SQG5_ASPFM	http://amigo.geneontology.org/cgi-bin/amigo/term_details?term=GO:0043936
pathogenesis	Gene Ontology	GO:0009405	3	115	0.0961245	0.239827	tr|A0A0J5PMP0|A0A0J5PMP0_ASPFM|tr|A0A0J5SQG5|A0A0J5SQG5_ASPFM|tr|A0A0J5PHI4|A0A0J5PHI4_ASPFM	http://amigo.geneontology.org/cgi-bin/amigo/term_details?term=GO:0009405
cytoplasmic microtubule organization	Gene Ontology	GO:0031122	1	10	0.0973128	0.239827	tr|A0A0J5PKZ7|A0A0J5PKZ7_ASPFM	http://amigo.geneontology.org/cgi-bin/amigo/term_details?term=GO:0031122
regulation of establishment or maintenance of cell polarity regulating cell shape	Gene Ontology	GO:2000769	1	10	0.0973128	0.239827	tr|A0A0J5SQG5|A0A0J5SQG5_ASPFM	http://amigo.geneontology.org/cgi-bin/amigo/term_details?term=GO:2000769
sulfur compound transmembrane transporter activity	Gene Ontology	GO:1901682	1	10	0.0973128	0.239827	tr|A0A0J5Q4T5|A0A0J5Q4T5_ASPFM	http://amigo.geneontology.org/cgi-bin/amigo/term_details?term=GO:1901682
cAMP metabolic process	Gene Ontology	GO:0046058	1	10	0.0973128	0.239827	tr|A0A0J5SQG5|A0A0J5SQG5_ASPFM	http://amigo.geneontology.org/cgi-bin/amigo/term_details?term=GO:0046058
proteasome core complex	Gene Ontology	GO:0005839	1	10	0.0973128	0.239827	tr|A0A0J5Q2W2|A0A0J5Q2W2_ASPFM	http://amigo.geneontology.org/cgi-bin/amigo/term_details?term=GO:0005839
Golgi-associated vesicle membrane	Gene Ontology	GO:0030660	1	10	0.0973128	0.239827	tr|A0A0J5PZF9|A0A0J5PZF9_ASPFM	http://amigo.geneontology.org/cgi-bin/amigo/term_details?term=GO:0030660
positive regulation of transcription from RNA polymerase II promoter involved in cellular response to chemical stimulus	Gene Ontology	GO:1901522	1	10	0.0973128	0.239827	tr|A0A0J5SQG5|A0A0J5SQG5_ASPFM	http://amigo.geneontology.org/cgi-bin/amigo/term_details?term=GO:1901522
cell wall chitin metabolic process	Gene Ontology	GO:0006037	1	10	0.0973128	0.239827	tr|A0A0J5PMP0|A0A0J5PMP0_ASPFM	http://amigo.geneontology.org/cgi-bin/amigo/term_details?term=GO:0006037
proton-transporting two-sector ATPase complex, proton-transporting domain	Gene Ontology	GO:0033177	1	10	0.0973128	0.239827	tr|A0A0J5PQL3|A0A0J5PQL3_ASPFM	http://amigo.geneontology.org/cgi-bin/amigo/term_details?term=GO:0033177
microtubule motor activity	Gene Ontology	GO:0003777	1	10	0.0973128	0.239827	tr|A0A0J5PKZ7|A0A0J5PKZ7_ASPFM	http://amigo.geneontology.org/cgi-bin/amigo/term_details?term=GO:0003777
solute:proton symporter activity	Gene Ontology	GO:0015295	1	10	0.0973128	0.239827	tr|A0A0J5Q4T5|A0A0J5Q4T5_ASPFM	http://amigo.geneontology.org/cgi-bin/amigo/term_details?term=GO:0015295
small nucleolar ribonucleoprotein complex	Gene Ontology	GO:0005732	1	10	0.0973128	0.239827	tr|A0A0J5PNE9|A0A0J5PNE9_ASPFM	http://amigo.geneontology.org/cgi-bin/amigo/term_details?term=GO:0005732
positive regulation of protein localization to nucleus	Gene Ontology	GO:1900182	1	10	0.0973128	0.239827	tr|A0A0J5SQG5|A0A0J5SQG5_ASPFM	http://amigo.geneontology.org/cgi-bin/amigo/term_details?term=GO:1900182
negative regulation of induction of conjugation with cellular fusion	Gene Ontology	GO:0010515	1	10	0.0973128	0.239827	tr|A0A0J5PMP0|A0A0J5PMP0_ASPFM	http://amigo.geneontology.org/cgi-bin/amigo/term_details?term=GO:0010515
cytoplasmic sequestering of protein	Gene Ontology	GO:0051220	1	10	0.0973128	0.239827	tr|A0A0J5PMP0|A0A0J5PMP0_ASPFM	http://amigo.geneontology.org/cgi-bin/amigo/term_details?term=GO:0051220
cyclic nucleotide metabolic process	Gene Ontology	GO:0009187	1	10	0.0973128	0.239827	tr|A0A0J5SQG5|A0A0J5SQG5_ASPFM	http://amigo.geneontology.org/cgi-bin/amigo/term_details?term=GO:0009187
response to carbohydrate	Gene Ontology	GO:0009743	1	10	0.0973128	0.239827	tr|A0A0J5SQG5|A0A0J5SQG5_ASPFM	http://amigo.geneontology.org/cgi-bin/amigo/term_details?term=GO:0009743
cell division site	Gene Ontology	GO:0032153	3	116	0.0979801	0.240548	tr|A0A0J5PMP0|A0A0J5PMP0_ASPFM|tr|A0A0J5SQG5|A0A0J5SQG5_ASPFM|tr|A0A0J5PVS4|A0A0J5PVS4_ASPFM	http://amigo.geneontology.org/cgi-bin/amigo/term_details?term=GO:0032153
anion transport	Gene Ontology	GO:0006820	2	56	0.10051	0.246287	tr|A0A0J5PN06|A0A0J5PN06_ASPFM|tr|A0A0J5Q4T5|A0A0J5Q4T5_ASPFM	http://amigo.geneontology.org/cgi-bin/amigo/term_details?term=GO:0006820
protein folding	Gene Ontology	GO:0006457	2	57	0.103433	0.249437	tr|A0A0J5Q0U9|A0A0J5Q0U9_ASPFM|tr|A0A0J5PHI4|A0A0J5PHI4_ASPFM	http://amigo.geneontology.org/cgi-bin/amigo/term_details?term=GO:0006457
hydrolase activity	Gene Ontology	GO:0016787	13	948	0.104495	0.249437	tr|A0A0J5PRS9|A0A0J5PRS9_ASPFM|tr|A0A0J5SKW5|A0A0J5SKW5_ASPFM|tr|A0A0J5SWK4|A0A0J5SWK4_ASPFM|tr|A0A0J5Q6L6|A0A0J5Q6L6_ASPFM|tr|A0A0J5PKZ7|A0A0J5PKZ7_ASPFM|tr|A0A0J5SQG5|A0A0J5SQG5_ASPFM|tr|A0A0J5PQL3|A0A0J5PQL3_ASPFM|tr|A0A0J5Q2W2|A0A0J5Q2W2_ASPFM|tr|A0A0J5STT4|A0A0J5STT4_ASPFM|tr|A0A0J5PRC9|A0A0J5PRC9_ASPFM|tr|A0A0J5PV51|A0A0J5PV51_ASPFM|tr|A0A0J5Q3U7|A0A0J5Q3U7_ASPFM|tr|A0A0J5Q3T8|A0A0J5Q3T8_AS…	http://amigo.geneontology.org/cgi-bin/amigo/term_details?term=GO:0016787
amino sugar biosynthetic process	Gene Ontology	GO:0046349	1	11	0.105681	0.249437	tr|A0A0J5PMP0|A0A0J5PMP0_ASPFM	http://amigo.geneontology.org/cgi-bin/amigo/term_details?term=GO:0046349
Golgi cisterna	Gene Ontology	GO:0031985	1	11	0.105681	0.249437	tr|A0A0J5PV51|A0A0J5PV51_ASPFM	http://amigo.geneontology.org/cgi-bin/amigo/term_details?term=GO:0031985
glyceraldehyde-3-phosphate metabolic process	Gene Ontology	GO:0019682	1	11	0.105681	0.249437	tr|A0A0J5PWF4|A0A0J5PWF4_ASPFM	http://amigo.geneontology.org/cgi-bin/amigo/term_details?term=GO:0019682
proton-transporting ATP synthase activity, rotational mechanism	Gene Ontology	GO:0046933	1	11	0.105681	0.249437	tr|A0A0J5PQL3|A0A0J5PQL3_ASPFM	http://amigo.geneontology.org/cgi-bin/amigo/term_details?term=GO:0046933
organelle membrane fusion	Gene Ontology	GO:0090174	1	11	0.105681	0.249437	tr|A0A0J5PRS9|A0A0J5PRS9_ASPFM	http://amigo.geneontology.org/cgi-bin/amigo/term_details?term=GO:0090174
positive regulation of cell growth	Gene Ontology	GO:0030307	1	11	0.105681	0.249437	tr|A0A0J5SQG5|A0A0J5SQG5_ASPFM	http://amigo.geneontology.org/cgi-bin/amigo/term_details?term=GO:0030307
intrinsic component of mitochondrial inner membrane	Gene Ontology	GO:0031304	1	11	0.105681	0.249437	tr|A0A0J5Q5A4|A0A0J5Q5A4_ASPFM	http://amigo.geneontology.org/cgi-bin/amigo/term_details?term=GO:0031304
integral component of mitochondrial inner membrane	Gene Ontology	GO:0031305	1	11	0.105681	0.249437	tr|A0A0J5Q5A4|A0A0J5Q5A4_ASPFM	http://amigo.geneontology.org/cgi-bin/amigo/term_details?term=GO:0031305
amide transmembrane transporter activity	Gene Ontology	GO:0042887	1	11	0.105681	0.249437	tr|A0A0J5Q4T5|A0A0J5Q4T5_ASPFM	http://amigo.geneontology.org/cgi-bin/amigo/term_details?term=GO:0042887
COPI-coated vesicle	Gene Ontology	GO:0030137	1	11	0.105681	0.249437	tr|A0A0J5PZF9|A0A0J5PZF9_ASPFM	http://amigo.geneontology.org/cgi-bin/amigo/term_details?term=GO:0030137
cytoplasmic microtubule	Gene Ontology	GO:0005881	1	11	0.105681	0.249437	tr|A0A0J5PKZ7|A0A0J5PKZ7_ASPFM	http://amigo.geneontology.org/cgi-bin/amigo/term_details?term=GO:0005881
pentose-phosphate shunt	Gene Ontology	GO:0006098	1	11	0.105681	0.249437	tr|A0A0J5PWF4|A0A0J5PWF4_ASPFM	http://amigo.geneontology.org/cgi-bin/amigo/term_details?term=GO:0006098
protein localization to cell periphery	Gene Ontology	GO:1990778	1	11	0.105681	0.249437	tr|A0A0J5SQG5|A0A0J5SQG5_ASPFM	http://amigo.geneontology.org/cgi-bin/amigo/term_details?term=GO:1990778
regulation of protein catabolic process	Gene Ontology	GO:0042176	1	11	0.105681	0.249437	tr|A0A0J5PUB3|A0A0J5PUB3_ASPFM	http://amigo.geneontology.org/cgi-bin/amigo/term_details?term=GO:0042176
mitochondrial proton-transporting ATP synthase complex	Gene Ontology	GO:0005753	1	11	0.105681	0.249437	tr|A0A0J5PQL3|A0A0J5PQL3_ASPFM	http://amigo.geneontology.org/cgi-bin/amigo/term_details?term=GO:0005753
Golgi stack	Gene Ontology	GO:0005795	1	11	0.105681	0.249437	tr|A0A0J5PV51|A0A0J5PV51_ASPFM	http://amigo.geneontology.org/cgi-bin/amigo/term_details?term=GO:0005795
whole membrane	Gene Ontology	GO:0098805	4	192	0.10822	0.254963	tr|A0A0J5PV51|A0A0J5PV51_ASPFM|tr|A0A0J5PZF9|A0A0J5PZF9_ASPFM|tr|A0A0J5PN06|A0A0J5PN06_ASPFM|tr|A0A0J5Q1B9|A0A0J5Q1B9_ASPFM	http://amigo.geneontology.org/cgi-bin/amigo/term_details?term=GO:0098805
conjugation with cellular fusion	Gene Ontology	GO:0000747	2	59	0.10935	0.256836	tr|A0A0J5PMP0|A0A0J5PMP0_ASPFM|tr|A0A0J5SQG5|A0A0J5SQG5_ASPFM	http://amigo.geneontology.org/cgi-bin/amigo/term_details?term=GO:0000747
regulation of response to stimulus	Gene Ontology	GO:0048583	3	122	0.109415	0.256836	tr|A0A0J5PMP0|A0A0J5PMP0_ASPFM|tr|A0A0J5SQG5|A0A0J5SQG5_ASPFM|tr|A0A0J5PHI4|A0A0J5PHI4_ASPFM	http://amigo.geneontology.org/cgi-bin/amigo/term_details?term=GO:0048583
cellular macromolecule metabolic process	Gene Ontology	GO:0044260	18	1425	0.111406	0.259467	tr|A0A0J5PNE9|A0A0J5PNE9_ASPFM|tr|A0A0J5PDH8|A0A0J5PDH8_ASPFM|tr|A0A0J5Q4L0|A0A0J5Q4L0_ASPFM|tr|A0A0J5PKY1|A0A0J5PKY1_ASPFM|tr|A0A0J5Q2W2|A0A0J5Q2W2_ASPFM|tr|A0A0J5Q0I9|A0A0J5Q0I9_ASPFM|tr|A0A0J5PVE5|A0A0J5PVE5_ASPFM|tr|A0A0J5SQG5|A0A0J5SQG5_ASPFM|tr|A0A0J5PUB3|A0A0J5PUB3_ASPFM|tr|A0A0J5PNA9|A0A0J5PNA9_ASPFM|tr|A0A0J5PR80|A0A0J5PR80_ASPFM|tr|A0A0J5PI11|A0A0J5PI11_ASPFM|tr|A0A0J5SQA8|A0A0J5SQA8_AS…	http://amigo.geneontology.org/cgi-bin/amigo/term_details?term=GO:0044260
cellular metabolic process	Gene Ontology	GO:0044237	26	2202	0.11164	0.259467	tr|A0A0J5SQA8|A0A0J5SQA8_ASPFM|tr|A0A0J5Q2W2|A0A0J5Q2W2_ASPFM|tr|A0A0J5PQL3|A0A0J5PQL3_ASPFM|tr|A0A0J5PRM9|A0A0J5PRM9_ASPFM|tr|A0A0J5PWF4|A0A0J5PWF4_ASPFM|tr|A0A0J5PUK7|A0A0J5PUK7_ASPFM|tr|A0A0J5PVE5|A0A0J5PVE5_ASPFM|tr|A0A0J5PNA9|A0A0J5PNA9_ASPFM|tr|A0A0J5Q4L0|A0A0J5Q4L0_ASPFM|tr|A0A0J5PRC9|A0A0J5PRC9_ASPFM|tr|A0A0J5PDH8|A0A0J5PDH8_ASPFM|tr|A0A0J5PKY1|A0A0J5PKY1_ASPFM|tr|A0A0J5SQG5|A0A0J5SQG5_AS…	http://amigo.geneontology.org/cgi-bin/amigo/term_details?term=GO:0044237
macromolecular complex subunit organization	Gene Ontology	GO:0043933	6	350	0.111865	0.259467	tr|A0A0J5PEJ8|A0A0J5PEJ8_ASPFM|tr|A0A0J5PKY1|A0A0J5PKY1_ASPFM|tr|A0A0J5PKZ7|A0A0J5PKZ7_ASPFM|tr|A0A0J5PUB3|A0A0J5PUB3_ASPFM|tr|A0A0J5Q2W2|A0A0J5Q2W2_ASPFM|tr|A0A0J5PIQ5|A0A0J5PIQ5_ASPFM	http://amigo.geneontology.org/cgi-bin/amigo/term_details?term=GO:0043933
conjugation	Gene Ontology	GO:0000746	2	60	0.112342	0.259467	tr|A0A0J5PMP0|A0A0J5PMP0_ASPFM|tr|A0A0J5SQG5|A0A0J5SQG5_ASPFM	http://amigo.geneontology.org/cgi-bin/amigo/term_details?term=GO:0000746
cation transmembrane transporter activity	Gene Ontology	GO:0008324	3	124	0.113338	0.259467	tr|A0A0J5PN06|A0A0J5PN06_ASPFM|tr|A0A0J5Q4T5|A0A0J5Q4T5_ASPFM|tr|A0A0J5PQL3|A0A0J5PQL3_ASPFM	http://amigo.geneontology.org/cgi-bin/amigo/term_details?term=GO:0008324
ATP synthesis coupled proton transport	Gene Ontology	GO:0015986	1	12	0.113972	0.259467	tr|A0A0J5PQL3|A0A0J5PQL3_ASPFM	http://amigo.geneontology.org/cgi-bin/amigo/term_details?term=GO:0015986
mitotic spindle checkpoint	Gene Ontology	GO:0071174	1	12	0.113972	0.259467	tr|A0A0J5PMP0|A0A0J5PMP0_ASPFM	http://amigo.geneontology.org/cgi-bin/amigo/term_details?term=GO:0071174
proton-transporting ATP synthase complex	Gene Ontology	GO:0045259	1	12	0.113972	0.259467	tr|A0A0J5PQL3|A0A0J5PQL3_ASPFM	http://amigo.geneontology.org/cgi-bin/amigo/term_details?term=GO:0045259
U4/U6 x U5 tri-snRNP complex	Gene Ontology	GO:0046540	1	12	0.113972	0.259467	tr|A0A0J5PNE9|A0A0J5PNE9_ASPFM	http://amigo.geneontology.org/cgi-bin/amigo/term_details?term=GO:0046540
vesicle coat	Gene Ontology	GO:0030120	1	12	0.113972	0.259467	tr|A0A0J5PZF9|A0A0J5PZF9_ASPFM	http://amigo.geneontology.org/cgi-bin/amigo/term_details?term=GO:0030120
sulfur compound transport	Gene Ontology	GO:0072348	1	12	0.113972	0.259467	tr|A0A0J5Q4T5|A0A0J5Q4T5_ASPFM	http://amigo.geneontology.org/cgi-bin/amigo/term_details?term=GO:0072348
spindle checkpoint	Gene Ontology	GO:0031577	1	12	0.113972	0.259467	tr|A0A0J5PMP0|A0A0J5PMP0_ASPFM	http://amigo.geneontology.org/cgi-bin/amigo/term_details?term=GO:0031577
energy coupled proton transport, down electrochemical gradient	Gene Ontology	GO:0015985	1	12	0.113972	0.259467	tr|A0A0J5PQL3|A0A0J5PQL3_ASPFM	http://amigo.geneontology.org/cgi-bin/amigo/term_details?term=GO:0015985
plasma membrane organization	Gene Ontology	GO:0007009	1	12	0.113972	0.259467	tr|A0A0J5SQG5|A0A0J5SQG5_ASPFM	http://amigo.geneontology.org/cgi-bin/amigo/term_details?term=GO:0007009
spliceosomal tri-snRNP complex	Gene Ontology	GO:0097526	1	12	0.113972	0.259467	tr|A0A0J5PNE9|A0A0J5PNE9_ASPFM	http://amigo.geneontology.org/cgi-bin/amigo/term_details?term=GO:0097526
mitochondrion distribution	Gene Ontology	GO:0048311	1	12	0.113972	0.259467	tr|A0A0J5Q0U9|A0A0J5Q0U9_ASPFM	http://amigo.geneontology.org/cgi-bin/amigo/term_details?term=GO:0048311
regulation of establishment or maintenance of cell polarity	Gene Ontology	GO:0032878	1	12	0.113972	0.259467	tr|A0A0J5SQG5|A0A0J5SQG5_ASPFM	http://amigo.geneontology.org/cgi-bin/amigo/term_details?term=GO:0032878
cation transport	Gene Ontology	GO:0006812	3	125	0.11532	0.261227	tr|A0A0J5PN06|A0A0J5PN06_ASPFM|tr|A0A0J5Q4T5|A0A0J5Q4T5_ASPFM|tr|A0A0J5PQL3|A0A0J5PQL3_ASPFM	http://amigo.geneontology.org/cgi-bin/amigo/term_details?term=GO:0006812
regulation of response to stress	Gene Ontology	GO:0080134	2	61	0.115355	0.261227	tr|A0A0J5SQG5|A0A0J5SQG5_ASPFM|tr|A0A0J5PHI4|A0A0J5PHI4_ASPFM	http://amigo.geneontology.org/cgi-bin/amigo/term_details?term=GO:0080134
mitochondrial protein complex	Gene Ontology	GO:0098798	2	62	0.118388	0.263234	tr|A0A0J5Q5A4|A0A0J5Q5A4_ASPFM|tr|A0A0J5PQL3|A0A0J5PQL3_ASPFM	http://amigo.geneontology.org/cgi-bin/amigo/term_details?term=GO:0098798
cell surface	Gene Ontology	GO:0009986	2	62	0.118388	0.263234	tr|A0A0J5PWF4|A0A0J5PWF4_ASPFM|tr|A0A0J5PMP0|A0A0J5PMP0_ASPFM	http://amigo.geneontology.org/cgi-bin/amigo/term_details?term=GO:0009986
alpha-amino acid biosynthetic process	Gene Ontology	GO:1901607	2	62	0.118388	0.263234	tr|A0A0J5SCF2|A0A0J5SCF2_ASPFM|tr|A0A0J5Q1H9|A0A0J5Q1H9_ASPFM	http://amigo.geneontology.org/cgi-bin/amigo/term_details?term=GO:1901607
single-multicellular organism process	Gene Ontology	GO:0044707	3	127	0.119322	0.263234	tr|A0A0J5PRS9|A0A0J5PRS9_ASPFM|tr|A0A0J5SQG5|A0A0J5SQG5_ASPFM|tr|A0A0J5Q1H9|A0A0J5Q1H9_ASPFM	http://amigo.geneontology.org/cgi-bin/amigo/term_details?term=GO:0044707
multicellular organismal process	Gene Ontology	GO:0032501	3	127	0.119322	0.263234	tr|A0A0J5PRS9|A0A0J5PRS9_ASPFM|tr|A0A0J5SQG5|A0A0J5SQG5_ASPFM|tr|A0A0J5Q1H9|A0A0J5Q1H9_ASPFM	http://amigo.geneontology.org/cgi-bin/amigo/term_details?term=GO:0032501
cellular response to nutrient levels	Gene Ontology	GO:0031669	3	128	0.121343	0.263234	tr|A0A0J5PNA9|A0A0J5PNA9_ASPFM|tr|A0A0J5SQG5|A0A0J5SQG5_ASPFM|tr|A0A0J5PHI4|A0A0J5PHI4_ASPFM	http://amigo.geneontology.org/cgi-bin/amigo/term_details?term=GO:0031669
cation transmembrane transport	Gene Ontology	GO:0098655	2	63	0.121442	0.263234	tr|A0A0J5Q4T5|A0A0J5Q4T5_ASPFM|tr|A0A0J5PQL3|A0A0J5PQL3_ASPFM	http://amigo.geneontology.org/cgi-bin/amigo/term_details?term=GO:0098655
cellular amino acid biosynthetic process	Gene Ontology	GO:0008652	2	63	0.121442	0.263234	tr|A0A0J5SCF2|A0A0J5SCF2_ASPFM|tr|A0A0J5Q1H9|A0A0J5Q1H9_ASPFM	http://amigo.geneontology.org/cgi-bin/amigo/term_details?term=GO:0008652
integral component of plasma membrane	Gene Ontology	GO:0005887	1	13	0.122186	0.263234	tr|A0A0J5Q4T5|A0A0J5Q4T5_ASPFM	http://amigo.geneontology.org/cgi-bin/amigo/term_details?term=GO:0005887
regulation of septation initiation signaling	Gene Ontology	GO:0031029	1	13	0.122186	0.263234	tr|A0A0J5PMP0|A0A0J5PMP0_ASPFM	http://amigo.geneontology.org/cgi-bin/amigo/term_details?term=GO:0031029
enzyme inhibitor activity	Gene Ontology	GO:0004857	1	13	0.122186	0.263234	tr|A0A0J5PMP0|A0A0J5PMP0_ASPFM	http://amigo.geneontology.org/cgi-bin/amigo/term_details?term=GO:0004857
Prp19 complex	Gene Ontology	GO:0000974	1	13	0.122186	0.263234	tr|A0A0J5Q1L6|A0A0J5Q1L6_ASPFM	http://amigo.geneontology.org/cgi-bin/amigo/term_details?term=GO:0000974
glucose homeostasis	Gene Ontology	GO:0042593	1	13	0.122186	0.263234	tr|A0A0J5SQG5|A0A0J5SQG5_ASPFM	http://amigo.geneontology.org/cgi-bin/amigo/term_details?term=GO:0042593
small GTPase binding	Gene Ontology	GO:0031267	1	13	0.122186	0.263234	tr|A0A0J5PH08|A0A0J5PH08_ASPFM	http://amigo.geneontology.org/cgi-bin/amigo/term_details?term=GO:0031267
negative regulation of metaphase/anaphase transition of cell cycle	Gene Ontology	GO:1902100	1	13	0.122186	0.263234	tr|A0A0J5PMP0|A0A0J5PMP0_ASPFM	http://amigo.geneontology.org/cgi-bin/amigo/term_details?term=GO:1902100
cellular glucose homeostasis	Gene Ontology	GO:0001678	1	13	0.122186	0.263234	tr|A0A0J5SQG5|A0A0J5SQG5_ASPFM	http://amigo.geneontology.org/cgi-bin/amigo/term_details?term=GO:0001678
NADP metabolic process	Gene Ontology	GO:0006739	1	13	0.122186	0.263234	tr|A0A0J5PWF4|A0A0J5PWF4_ASPFM	http://amigo.geneontology.org/cgi-bin/amigo/term_details?term=GO:0006739
negative regulation of mitotic metaphase/anaphase transition	Gene Ontology	GO:0045841	1	13	0.122186	0.263234	tr|A0A0J5PMP0|A0A0J5PMP0_ASPFM	http://amigo.geneontology.org/cgi-bin/amigo/term_details?term=GO:0045841
glucose 6-phosphate metabolic process	Gene Ontology	GO:0051156	1	13	0.122186	0.263234	tr|A0A0J5PWF4|A0A0J5PWF4_ASPFM	http://amigo.geneontology.org/cgi-bin/amigo/term_details?term=GO:0051156
carbohydrate homeostasis	Gene Ontology	GO:0033500	1	13	0.122186	0.263234	tr|A0A0J5SQG5|A0A0J5SQG5_ASPFM	http://amigo.geneontology.org/cgi-bin/amigo/term_details?term=GO:0033500
cell adhesion involved in single-species biofilm formation	Gene Ontology	GO:0043709	1	13	0.122186	0.263234	tr|A0A0J5SQG5|A0A0J5SQG5_ASPFM	http://amigo.geneontology.org/cgi-bin/amigo/term_details?term=GO:0043709
filamentous growth of a population of unicellular organisms in response to chemical stimulus	Gene Ontology	GO:0036171	1	13	0.122186	0.263234	tr|A0A0J5SQG5|A0A0J5SQG5_ASPFM	http://amigo.geneontology.org/cgi-bin/amigo/term_details?term=GO:0036171
regulation of single-species biofilm formation	Gene Ontology	GO:1900190	1	13	0.122186	0.263234	tr|A0A0J5SQG5|A0A0J5SQG5_ASPFM	http://amigo.geneontology.org/cgi-bin/amigo/term_details?term=GO:1900190
motor activity	Gene Ontology	GO:0003774	1	13	0.122186	0.263234	tr|A0A0J5PKZ7|A0A0J5PKZ7_ASPFM	http://amigo.geneontology.org/cgi-bin/amigo/term_details?term=GO:0003774
negative regulation of mitotic sister chromatid separation	Gene Ontology	GO:2000816	1	13	0.122186	0.263234	tr|A0A0J5PMP0|A0A0J5PMP0_ASPFM	http://amigo.geneontology.org/cgi-bin/amigo/term_details?term=GO:2000816
Ras GTPase binding	Gene Ontology	GO:0017016	1	13	0.122186	0.263234	tr|A0A0J5PH08|A0A0J5PH08_ASPFM	http://amigo.geneontology.org/cgi-bin/amigo/term_details?term=GO:0017016
phenotypic switching	Gene Ontology	GO:0036166	1	13	0.122186	0.263234	tr|A0A0J5SQG5|A0A0J5SQG5_ASPFM	http://amigo.geneontology.org/cgi-bin/amigo/term_details?term=GO:0036166
nuclear migration along microtubule	Gene Ontology	GO:0030473	1	13	0.122186	0.263234	tr|A0A0J5PKZ7|A0A0J5PKZ7_ASPFM	http://amigo.geneontology.org/cgi-bin/amigo/term_details?term=GO:0030473
positive regulation of filamentous growth of a population of unicellular organisms in response to starvation	Gene Ontology	GO:1900436	1	13	0.122186	0.263234	tr|A0A0J5PHI4|A0A0J5PHI4_ASPFM	http://amigo.geneontology.org/cgi-bin/amigo/term_details?term=GO:1900436
cellular response to extracellular stimulus	Gene Ontology	GO:0031668	3	129	0.123376	0.265352	tr|A0A0J5PNA9|A0A0J5PNA9_ASPFM|tr|A0A0J5SQG5|A0A0J5SQG5_ASPFM|tr|A0A0J5PHI4|A0A0J5PHI4_ASPFM	http://amigo.geneontology.org/cgi-bin/amigo/term_details?term=GO:0031668
Golgi apparatus part	Gene Ontology	GO:0044431	2	64	0.124515	0.266908	tr|A0A0J5PV51|A0A0J5PV51_ASPFM|tr|A0A0J5PZF9|A0A0J5PZF9_ASPFM	http://amigo.geneontology.org/cgi-bin/amigo/term_details?term=GO:0044431
ATPase activity, coupled to transmembrane movement of substances	Gene Ontology	GO:0042626	2	64	0.124515	0.266908	tr|A0A0J5Q3U7|A0A0J5Q3U7_ASPFM|tr|A0A0J5PQL3|A0A0J5PQL3_ASPFM	http://amigo.geneontology.org/cgi-bin/amigo/term_details?term=GO:0042626
filamentous growth	Gene Ontology	GO:0030447	5	282	0.126931	0.268171	tr|A0A0J5PNA9|A0A0J5PNA9_ASPFM|tr|A0A0J5PMP0|A0A0J5PMP0_ASPFM|tr|A0A0J5SQG5|A0A0J5SQG5_ASPFM|tr|A0A0J5Q1B9|A0A0J5Q1B9_ASPFM|tr|A0A0J5PHI4|A0A0J5PHI4_ASPFM	http://amigo.geneontology.org/cgi-bin/amigo/term_details?term=GO:0030447
integral component of membrane	Gene Ontology	GO:0016021	8	533	0.127305	0.268171	tr|A0A0J5PTR2|A0A0J5PTR2_ASPFM|tr|A0A0J5Q5A4|A0A0J5Q5A4_ASPFM|tr|A0A0J5PQE4|A0A0J5PQE4_ASPFM|tr|A0A0J5PHI4|A0A0J5PHI4_ASPFM|tr|A0A0J5PN06|A0A0J5PN06_ASPFM|tr|A0A0J5Q2G5|A0A0J5Q2G5_ASPFM|tr|A0A0J5Q4T5|A0A0J5Q4T5_ASPFM|tr|A0A0J5Q3U7|A0A0J5Q3U7_ASPFM	http://amigo.geneontology.org/cgi-bin/amigo/term_details?term=GO:0016021
ATPase activity, coupled to movement of substances	Gene Ontology	GO:0043492	2	65	0.127607	0.268171	tr|A0A0J5Q3U7|A0A0J5Q3U7_ASPFM|tr|A0A0J5PQL3|A0A0J5PQL3_ASPFM	http://amigo.geneontology.org/cgi-bin/amigo/term_details?term=GO:0043492
hydrolase activity, acting on acid anhydrides, catalyzing transmembrane movement of substances	Gene Ontology	GO:0016820	2	65	0.127607	0.268171	tr|A0A0J5Q3U7|A0A0J5Q3U7_ASPFM|tr|A0A0J5PQL3|A0A0J5PQL3_ASPFM	http://amigo.geneontology.org/cgi-bin/amigo/term_details?term=GO:0016820
cellular response to external stimulus	Gene Ontology	GO:0071496	3	132	0.129551	0.268171	tr|A0A0J5PNA9|A0A0J5PNA9_ASPFM|tr|A0A0J5SQG5|A0A0J5SQG5_ASPFM|tr|A0A0J5PHI4|A0A0J5PHI4_ASPFM	http://amigo.geneontology.org/cgi-bin/amigo/term_details?term=GO:0071496
regulation of cell growth	Gene Ontology	GO:0001558	1	14	0.130326	0.268171	tr|A0A0J5SQG5|A0A0J5SQG5_ASPFM	http://amigo.geneontology.org/cgi-bin/amigo/term_details?term=GO:0001558
arginine metabolic process	Gene Ontology	GO:0006525	1	14	0.130326	0.268171	tr|A0A0J5SCF2|A0A0J5SCF2_ASPFM	http://amigo.geneontology.org/cgi-bin/amigo/term_details?term=GO:0006525
organelle transport along microtubule	Gene Ontology	GO:0072384	1	14	0.130326	0.268171	tr|A0A0J5PKZ7|A0A0J5PKZ7_ASPFM	http://amigo.geneontology.org/cgi-bin/amigo/term_details?term=GO:0072384
carbon catabolite regulation of transcription	Gene Ontology	GO:0045990	1	14	0.130326	0.268171	tr|A0A0J5SQG5|A0A0J5SQG5_ASPFM	http://amigo.geneontology.org/cgi-bin/amigo/term_details?term=GO:0045990
negative regulation of mitotic sister chromatid segregation	Gene Ontology	GO:0033048	1	14	0.130326	0.268171	tr|A0A0J5PMP0|A0A0J5PMP0_ASPFM	http://amigo.geneontology.org/cgi-bin/amigo/term_details?term=GO:0033048
rRNA binding	Gene Ontology	GO:0019843	1	14	0.130326	0.268171	tr|A0A0J5PKY1|A0A0J5PKY1_ASPFM	http://amigo.geneontology.org/cgi-bin/amigo/term_details?term=GO:0019843
positive regulation of cellular protein localization	Gene Ontology	GO:1903829	1	14	0.130326	0.268171	tr|A0A0J5SQG5|A0A0J5SQG5_ASPFM	http://amigo.geneontology.org/cgi-bin/amigo/term_details?term=GO:1903829
negative regulation of chromosome segregation	Gene Ontology	GO:0051985	1	14	0.130326	0.268171	tr|A0A0J5PMP0|A0A0J5PMP0_ASPFM	http://amigo.geneontology.org/cgi-bin/amigo/term_details?term=GO:0051985
phosphate transmembrane transporter activity	Gene Ontology	GO:1901677	1	14	0.130326	0.268171	tr|A0A0J5Q2G5|A0A0J5Q2G5_ASPFM	http://amigo.geneontology.org/cgi-bin/amigo/term_details?term=GO:1901677
regulation of protein localization to nucleus	Gene Ontology	GO:1900180	1	14	0.130326	0.268171	tr|A0A0J5SQG5|A0A0J5SQG5_ASPFM	http://amigo.geneontology.org/cgi-bin/amigo/term_details?term=GO:1900180
cytoplasmic ribonucleoprotein granule	Gene Ontology	GO:0036464	1	14	0.130326	0.268171	tr|A0A0J5SKW5|A0A0J5SKW5_ASPFM	http://amigo.geneontology.org/cgi-bin/amigo/term_details?term=GO:0036464
cytoskeleton-dependent intracellular transport	Gene Ontology	GO:0030705	1	14	0.130326	0.268171	tr|A0A0J5PKZ7|A0A0J5PKZ7_ASPFM	http://amigo.geneontology.org/cgi-bin/amigo/term_details?term=GO:0030705
positive regulation of cellular catabolic process	Gene Ontology	GO:0031331	1	14	0.130326	0.268171	tr|A0A0J5PUB3|A0A0J5PUB3_ASPFM	http://amigo.geneontology.org/cgi-bin/amigo/term_details?term=GO:0031331
aromatic amino acid family biosynthetic process	Gene Ontology	GO:0009073	1	14	0.130326	0.268171	tr|A0A0J5Q1H9|A0A0J5Q1H9_ASPFM	http://amigo.geneontology.org/cgi-bin/amigo/term_details?term=GO:0009073
coated vesicle membrane	Gene Ontology	GO:0030662	1	14	0.130326	0.268171	tr|A0A0J5PZF9|A0A0J5PZF9_ASPFM	http://amigo.geneontology.org/cgi-bin/amigo/term_details?term=GO:0030662
transport along microtubule	Gene Ontology	GO:0010970	1	14	0.130326	0.268171	tr|A0A0J5PKZ7|A0A0J5PKZ7_ASPFM	http://amigo.geneontology.org/cgi-bin/amigo/term_details?term=GO:0010970
ribonucleoprotein granule	Gene Ontology	GO:0035770	1	14	0.130326	0.268171	tr|A0A0J5SKW5|A0A0J5SKW5_ASPFM	http://amigo.geneontology.org/cgi-bin/amigo/term_details?term=GO:0035770
negative regulation of sister chromatid segregation	Gene Ontology	GO:0033046	1	14	0.130326	0.268171	tr|A0A0J5PMP0|A0A0J5PMP0_ASPFM	http://amigo.geneontology.org/cgi-bin/amigo/term_details?term=GO:0033046
GTPase binding	Gene Ontology	GO:0051020	1	14	0.130326	0.268171	tr|A0A0J5PH08|A0A0J5PH08_ASPFM	http://amigo.geneontology.org/cgi-bin/amigo/term_details?term=GO:0051020
microtubule associated complex	Gene Ontology	GO:0005875	1	14	0.130326	0.268171	tr|A0A0J5PKZ7|A0A0J5PKZ7_ASPFM	http://amigo.geneontology.org/cgi-bin/amigo/term_details?term=GO:0005875
sexual reproduction	Gene Ontology	GO:0019953	4	207	0.131703	0.270139	tr|A0A0J5PKZ7|A0A0J5PKZ7_ASPFM|tr|A0A0J5PMP0|A0A0J5PMP0_ASPFM|tr|A0A0J5SQG5|A0A0J5SQG5_ASPFM|tr|A0A0J5Q1H9|A0A0J5Q1H9_ASPFM	http://amigo.geneontology.org/cgi-bin/amigo/term_details?term=GO:0019953
multi-organism reproductive process	Gene Ontology	GO:0044703	4	207	0.131703	0.270139	tr|A0A0J5PKZ7|A0A0J5PKZ7_ASPFM|tr|A0A0J5PMP0|A0A0J5PMP0_ASPFM|tr|A0A0J5SQG5|A0A0J5SQG5_ASPFM|tr|A0A0J5Q1H9|A0A0J5Q1H9_ASPFM	http://amigo.geneontology.org/cgi-bin/amigo/term_details?term=GO:0044703
reproduction	Gene Ontology	GO:0000003	6	368	0.132615	0.271575	tr|A0A0J5PKZ7|A0A0J5PKZ7_ASPFM|tr|A0A0J5SQG5|A0A0J5SQG5_ASPFM|tr|A0A0J5SCF2|A0A0J5SCF2_ASPFM|tr|A0A0J5Q1H9|A0A0J5Q1H9_ASPFM|tr|A0A0J5PRS9|A0A0J5PRS9_ASPFM|tr|A0A0J5PMP0|A0A0J5PMP0_ASPFM	http://amigo.geneontology.org/cgi-bin/amigo/term_details?term=GO:0000003
bounding membrane of organelle	Gene Ontology	GO:0098588	4	208	0.13334	0.271927	tr|A0A0J5PV51|A0A0J5PV51_ASPFM|tr|A0A0J5PZF9|A0A0J5PZF9_ASPFM|tr|A0A0J5PN06|A0A0J5PN06_ASPFM|tr|A0A0J5Q1B9|A0A0J5Q1B9_ASPFM	http://amigo.geneontology.org/cgi-bin/amigo/term_details?term=GO:0098588
nucleotide biosynthetic process	Gene Ontology	GO:0009165	2	67	0.133846	0.271927	tr|A0A0J5PQL3|A0A0J5PQL3_ASPFM|tr|A0A0J5SQG5|A0A0J5SQG5_ASPFM	http://amigo.geneontology.org/cgi-bin/amigo/term_details?term=GO:0009165
primary active transmembrane transporter activity	Gene Ontology	GO:0015399	2	67	0.133846	0.271927	tr|A0A0J5Q3U7|A0A0J5Q3U7_ASPFM|tr|A0A0J5PQL3|A0A0J5PQL3_ASPFM	http://amigo.geneontology.org/cgi-bin/amigo/term_details?term=GO:0015399
P-P-bond-hydrolysis-driven transmembrane transporter activity	Gene Ontology	GO:0015405	2	67	0.133846	0.271927	tr|A0A0J5Q3U7|A0A0J5Q3U7_ASPFM|tr|A0A0J5PQL3|A0A0J5PQL3_ASPFM	http://amigo.geneontology.org/cgi-bin/amigo/term_details?term=GO:0015405
filamentous growth of a population of unicellular organisms in response to starvation	Gene Ontology	GO:0036170	2	68	0.136991	0.273078	tr|A0A0J5PNA9|A0A0J5PNA9_ASPFM|tr|A0A0J5PHI4|A0A0J5PHI4_ASPFM	http://amigo.geneontology.org/cgi-bin/amigo/term_details?term=GO:0036170
ATP biosynthetic process	Gene Ontology	GO:0006754	1	15	0.138391	0.273078	tr|A0A0J5PQL3|A0A0J5PQL3_ASPFM	http://amigo.geneontology.org/cgi-bin/amigo/term_details?term=GO:0006754
nitrogen utilization	Gene Ontology	GO:0019740	1	15	0.138391	0.273078	tr|A0A0J5PN06|A0A0J5PN06_ASPFM	http://amigo.geneontology.org/cgi-bin/amigo/term_details?term=GO:0019740
septation initiation signaling	Gene Ontology	GO:0031028	1	15	0.138391	0.273078	tr|A0A0J5PMP0|A0A0J5PMP0_ASPFM	http://amigo.geneontology.org/cgi-bin/amigo/term_details?term=GO:0031028
positive regulation of mitotic cytokinetic process	Gene Ontology	GO:1903438	1	15	0.138391	0.273078	tr|A0A0J5PMP0|A0A0J5PMP0_ASPFM	http://amigo.geneontology.org/cgi-bin/amigo/term_details?term=GO:1903438
negative regulation of protein modification process	Gene Ontology	GO:0031400	1	15	0.138391	0.273078	tr|A0A0J5PMP0|A0A0J5PMP0_ASPFM	http://amigo.geneontology.org/cgi-bin/amigo/term_details?term=GO:0031400
maintenance of protein location in cell	Gene Ontology	GO:0032507	1	15	0.138391	0.273078	tr|A0A0J5PMP0|A0A0J5PMP0_ASPFM	http://amigo.geneontology.org/cgi-bin/amigo/term_details?term=GO:0032507
negative regulation of conjugation with cellular fusion	Gene Ontology	GO:0031138	1	15	0.138391	0.273078	tr|A0A0J5PMP0|A0A0J5PMP0_ASPFM	http://amigo.geneontology.org/cgi-bin/amigo/term_details?term=GO:0031138
positive regulation of cell septum assembly	Gene Ontology	GO:1901893	1	15	0.138391	0.273078	tr|A0A0J5PMP0|A0A0J5PMP0_ASPFM	http://amigo.geneontology.org/cgi-bin/amigo/term_details?term=GO:1901893
maintenance of protein location	Gene Ontology	GO:0045185	1	15	0.138391	0.273078	tr|A0A0J5PMP0|A0A0J5PMP0_ASPFM	http://amigo.geneontology.org/cgi-bin/amigo/term_details?term=GO:0045185
reactive oxygen species metabolic process	Gene Ontology	GO:0072593	1	15	0.138391	0.273078	tr|A0A0J5SQG5|A0A0J5SQG5_ASPFM	http://amigo.geneontology.org/cgi-bin/amigo/term_details?term=GO:0072593
positive regulation of mitotic cytokinesis	Gene Ontology	GO:1903490	1	15	0.138391	0.273078	tr|A0A0J5PMP0|A0A0J5PMP0_ASPFM	http://amigo.geneontology.org/cgi-bin/amigo/term_details?term=GO:1903490
GTPase activator activity	Gene Ontology	GO:0005096	1	15	0.138391	0.273078	tr|A0A0J5PVS4|A0A0J5PVS4_ASPFM	http://amigo.geneontology.org/cgi-bin/amigo/term_details?term=GO:0005096
regulation of filamentous growth of a population of unicellular organisms in response to starvation	Gene Ontology	GO:1900434	1	15	0.138391	0.273078	tr|A0A0J5PHI4|A0A0J5PHI4_ASPFM	http://amigo.geneontology.org/cgi-bin/amigo/term_details?term=GO:1900434
organic acid transmembrane transport	Gene Ontology	GO:1903825	1	15	0.138391	0.273078	tr|A0A0J5Q4T5|A0A0J5Q4T5_ASPFM	http://amigo.geneontology.org/cgi-bin/amigo/term_details?term=GO:1903825
negative regulation of conjugation	Gene Ontology	GO:0031135	1	15	0.138391	0.273078	tr|A0A0J5PMP0|A0A0J5PMP0_ASPFM	http://amigo.geneontology.org/cgi-bin/amigo/term_details?term=GO:0031135
pheromone-dependent signal transduction involved in conjugation with cellular fusion	Gene Ontology	GO:0000750	1	15	0.138391	0.273078	tr|A0A0J5SQG5|A0A0J5SQG5_ASPFM	http://amigo.geneontology.org/cgi-bin/amigo/term_details?term=GO:0000750
negative regulation of mitotic nuclear division	Gene Ontology	GO:0045839	1	15	0.138391	0.273078	tr|A0A0J5PMP0|A0A0J5PMP0_ASPFM	http://amigo.geneontology.org/cgi-bin/amigo/term_details?term=GO:0045839
intrinsic component of membrane	Gene Ontology	GO:0031224	8	545	0.139158	0.273078	tr|A0A0J5PTR2|A0A0J5PTR2_ASPFM|tr|A0A0J5Q5A4|A0A0J5Q5A4_ASPFM|tr|A0A0J5PQE4|A0A0J5PQE4_ASPFM|tr|A0A0J5PHI4|A0A0J5PHI4_ASPFM|tr|A0A0J5PN06|A0A0J5PN06_ASPFM|tr|A0A0J5Q2G5|A0A0J5Q2G5_ASPFM|tr|A0A0J5Q4T5|A0A0J5Q4T5_ASPFM|tr|A0A0J5Q3U7|A0A0J5Q3U7_ASPFM	http://amigo.geneontology.org/cgi-bin/amigo/term_details?term=GO:0031224
regulation of signal transduction	Gene Ontology	GO:0009966	2	69	0.140152	0.273078	tr|A0A0J5PMP0|A0A0J5PMP0_ASPFM|tr|A0A0J5SQG5|A0A0J5SQG5_ASPFM	http://amigo.geneontology.org/cgi-bin/amigo/term_details?term=GO:0009966
response to nutrient levels	Gene Ontology	GO:0031667	3	138	0.142221	0.273078	tr|A0A0J5PNA9|A0A0J5PNA9_ASPFM|tr|A0A0J5SQG5|A0A0J5SQG5_ASPFM|tr|A0A0J5PHI4|A0A0J5PHI4_ASPFM	http://amigo.geneontology.org/cgi-bin/amigo/term_details?term=GO:0031667
phospholipid metabolic process	Gene Ontology	GO:0006644	2	70	0.143329	0.273078	tr|A0A0J5PUK7|A0A0J5PUK7_ASPFM|tr|A0A0J5Q6L6|A0A0J5Q6L6_ASPFM	http://amigo.geneontology.org/cgi-bin/amigo/term_details?term=GO:0006644
regulation of multi-organism process	Gene Ontology	GO:0043900	2	70	0.143329	0.273078	tr|A0A0J5PMP0|A0A0J5PMP0_ASPFM|tr|A0A0J5SQG5|A0A0J5SQG5_ASPFM	http://amigo.geneontology.org/cgi-bin/amigo/term_details?term=GO:0043900
positive regulation of transcription from RNA polymerase II promoter	Gene Ontology	GO:0045944	2	70	0.143329	0.273078	tr|A0A0J5SQG5|A0A0J5SQG5_ASPFM|tr|A0A0J5PIQ5|A0A0J5PIQ5_ASPFM	http://amigo.geneontology.org/cgi-bin/amigo/term_details?term=GO:0045944
response to extracellular stimulus	Gene Ontology	GO:0009991	3	139	0.144373	0.273078	tr|A0A0J5PNA9|A0A0J5PNA9_ASPFM|tr|A0A0J5SQG5|A0A0J5SQG5_ASPFM|tr|A0A0J5PHI4|A0A0J5PHI4_ASPFM	http://amigo.geneontology.org/cgi-bin/amigo/term_details?term=GO:0009991
regulation of transcription from RNA polymerase II promoter	Gene Ontology	GO:0006357	3	139	0.144373	0.273078	tr|A0A0J5PMP0|A0A0J5PMP0_ASPFM|tr|A0A0J5SQG5|A0A0J5SQG5_ASPFM|tr|A0A0J5PIQ5|A0A0J5PIQ5_ASPFM	http://amigo.geneontology.org/cgi-bin/amigo/term_details?term=GO:0006357
transmembrane transport	Gene Ontology	GO:0055085	7	464	0.145589	0.273078	tr|A0A0J5PTR2|A0A0J5PTR2_ASPFM|tr|A0A0J5Q2G5|A0A0J5Q2G5_ASPFM|tr|A0A0J5PQE4|A0A0J5PQE4_ASPFM|tr|A0A0J5PN06|A0A0J5PN06_ASPFM|tr|A0A0J5PQL3|A0A0J5PQL3_ASPFM|tr|A0A0J5Q4T5|A0A0J5Q4T5_ASPFM|tr|A0A0J5Q3U7|A0A0J5Q3U7_ASPFM	http://amigo.geneontology.org/cgi-bin/amigo/term_details?term=GO:0055085
incipient cellular bud site	Gene Ontology	GO:0000131	1	16	0.146382	0.273078	tr|A0A0J5PRS9|A0A0J5PRS9_ASPFM	http://amigo.geneontology.org/cgi-bin/amigo/term_details?term=GO:0000131
cytoplasmic vesicle membrane	Gene Ontology	GO:0030659	1	16	0.146382	0.273078	tr|A0A0J5PZF9|A0A0J5PZF9_ASPFM	http://amigo.geneontology.org/cgi-bin/amigo/term_details?term=GO:0030659
regulation of actomyosin contractile ring contraction	Gene Ontology	GO:0031991	1	16	0.146382	0.273078	tr|A0A0J5PMP0|A0A0J5PMP0_ASPFM	http://amigo.geneontology.org/cgi-bin/amigo/term_details?term=GO:0031991
positive regulation of response to nutrient levels	Gene Ontology	GO:0032109	1	16	0.146382	0.273078	tr|A0A0J5PHI4|A0A0J5PHI4_ASPFM	http://amigo.geneontology.org/cgi-bin/amigo/term_details?term=GO:0032109
transferase activity, transferring pentosyl groups	Gene Ontology	GO:0016763	1	16	0.146382	0.273078	tr|A0A0J5PRM9|A0A0J5PRM9_ASPFM	http://amigo.geneontology.org/cgi-bin/amigo/term_details?term=GO:0016763
positive regulation of cell division	Gene Ontology	GO:0051781	1	16	0.146382	0.273078	tr|A0A0J5PMP0|A0A0J5PMP0_ASPFM	http://amigo.geneontology.org/cgi-bin/amigo/term_details?term=GO:0051781
purine nucleoside triphosphate biosynthetic process	Gene Ontology	GO:0009145	1	16	0.146382	0.273078	tr|A0A0J5PQL3|A0A0J5PQL3_ASPFM	http://amigo.geneontology.org/cgi-bin/amigo/term_details?term=GO:0009145
cell adhesion involved in biofilm formation	Gene Ontology	GO:0043708	1	16	0.146382	0.273078	tr|A0A0J5SQG5|A0A0J5SQG5_ASPFM	http://amigo.geneontology.org/cgi-bin/amigo/term_details?term=GO:0043708
import into cell	Gene Ontology	GO:0098657	1	16	0.146382	0.273078	tr|A0A0J5Q4T5|A0A0J5Q4T5_ASPFM	http://amigo.geneontology.org/cgi-bin/amigo/term_details?term=GO:0098657
mitochondrion localization	Gene Ontology	GO:0051646	1	16	0.146382	0.273078	tr|A0A0J5Q0U9|A0A0J5Q0U9_ASPFM	http://amigo.geneontology.org/cgi-bin/amigo/term_details?term=GO:0051646
proteasome assembly	Gene Ontology	GO:0043248	1	16	0.146382	0.273078	tr|A0A0J5Q2W2|A0A0J5Q2W2_ASPFM	http://amigo.geneontology.org/cgi-bin/amigo/term_details?term=GO:0043248
solute:cation symporter activity	Gene Ontology	GO:0015294	1	16	0.146382	0.273078	tr|A0A0J5Q4T5|A0A0J5Q4T5_ASPFM	http://amigo.geneontology.org/cgi-bin/amigo/term_details?term=GO:0015294
symporter activity	Gene Ontology	GO:0015293	1	16	0.146382	0.273078	tr|A0A0J5Q4T5|A0A0J5Q4T5_ASPFM	http://amigo.geneontology.org/cgi-bin/amigo/term_details?term=GO:0015293
intramolecular transferase activity	Gene Ontology	GO:0016866	1	16	0.146382	0.273078	tr|A0A0J5Q1H9|A0A0J5Q1H9_ASPFM	http://amigo.geneontology.org/cgi-bin/amigo/term_details?term=GO:0016866
signal transduction by protein phosphorylation	Gene Ontology	GO:0023014	1	16	0.146382	0.273078	tr|A0A0J5SQG5|A0A0J5SQG5_ASPFM	http://amigo.geneontology.org/cgi-bin/amigo/term_details?term=GO:0023014
positive regulation of cytokinesis	Gene Ontology	GO:0032467	1	16	0.146382	0.273078	tr|A0A0J5PMP0|A0A0J5PMP0_ASPFM	http://amigo.geneontology.org/cgi-bin/amigo/term_details?term=GO:0032467
negative regulation of cell cycle G2/M phase transition	Gene Ontology	GO:1902750	1	16	0.146382	0.273078	tr|A0A0J5PMP0|A0A0J5PMP0_ASPFM	http://amigo.geneontology.org/cgi-bin/amigo/term_details?term=GO:1902750
vesicle membrane	Gene Ontology	GO:0012506	1	16	0.146382	0.273078	tr|A0A0J5PZF9|A0A0J5PZF9_ASPFM	http://amigo.geneontology.org/cgi-bin/amigo/term_details?term=GO:0012506
MAPK cascade	Gene Ontology	GO:0000165	1	16	0.146382	0.273078	tr|A0A0J5SQG5|A0A0J5SQG5_ASPFM	http://amigo.geneontology.org/cgi-bin/amigo/term_details?term=GO:0000165
positive regulation of response to external stimulus	Gene Ontology	GO:0032103	1	16	0.146382	0.273078	tr|A0A0J5PHI4|A0A0J5PHI4_ASPFM	http://amigo.geneontology.org/cgi-bin/amigo/term_details?term=GO:0032103
NAD metabolic process	Gene Ontology	GO:0019674	1	16	0.146382	0.273078	tr|A0A0J5PRC9|A0A0J5PRC9_ASPFM	http://amigo.geneontology.org/cgi-bin/amigo/term_details?term=GO:0019674
negative regulation of G2/M transition of mitotic cell cycle	Gene Ontology	GO:0010972	1	16	0.146382	0.273078	tr|A0A0J5PMP0|A0A0J5PMP0_ASPFM	http://amigo.geneontology.org/cgi-bin/amigo/term_details?term=GO:0010972
regulation of barrier septum assembly	Gene Ontology	GO:0032955	1	16	0.146382	0.273078	tr|A0A0J5PMP0|A0A0J5PMP0_ASPFM	http://amigo.geneontology.org/cgi-bin/amigo/term_details?term=GO:0032955
positive regulation of catabolic process	Gene Ontology	GO:0009896	1	16	0.146382	0.273078	tr|A0A0J5PUB3|A0A0J5PUB3_ASPFM	http://amigo.geneontology.org/cgi-bin/amigo/term_details?term=GO:0009896
positive regulation of response to extracellular stimulus	Gene Ontology	GO:0032106	1	16	0.146382	0.273078	tr|A0A0J5PHI4|A0A0J5PHI4_ASPFM	http://amigo.geneontology.org/cgi-bin/amigo/term_details?term=GO:0032106
purine ribonucleoside triphosphate biosynthetic process	Gene Ontology	GO:0009206	1	16	0.146382	0.273078	tr|A0A0J5PQL3|A0A0J5PQL3_ASPFM	http://amigo.geneontology.org/cgi-bin/amigo/term_details?term=GO:0009206
mitochondrial membrane part	Gene Ontology	GO:0044455	2	71	0.146522	0.273078	tr|A0A0J5Q5A4|A0A0J5Q5A4_ASPFM|tr|A0A0J5PQL3|A0A0J5PQL3_ASPFM	http://amigo.geneontology.org/cgi-bin/amigo/term_details?term=GO:0044455
nucleoside phosphate biosynthetic process	Gene Ontology	GO:1901293	2	71	0.146522	0.273078	tr|A0A0J5PQL3|A0A0J5PQL3_ASPFM|tr|A0A0J5SQG5|A0A0J5SQG5_ASPFM	http://amigo.geneontology.org/cgi-bin/amigo/term_details?term=GO:1901293
ion transmembrane transporter activity	Gene Ontology	GO:0015075	3	140	0.146535	0.273078	tr|A0A0J5PN06|A0A0J5PN06_ASPFM|tr|A0A0J5Q4T5|A0A0J5Q4T5_ASPFM|tr|A0A0J5PQL3|A0A0J5PQL3_ASPFM	http://amigo.geneontology.org/cgi-bin/amigo/term_details?term=GO:0015075
regulation of signaling	Gene Ontology	GO:0023051	2	72	0.14973	0.278628	tr|A0A0J5PMP0|A0A0J5PMP0_ASPFM|tr|A0A0J5SQG5|A0A0J5SQG5_ASPFM	http://amigo.geneontology.org/cgi-bin/amigo/term_details?term=GO:0023051
reproductive process	Gene Ontology	GO:0022414	5	299	0.150763	0.280145	tr|A0A0J5PKZ7|A0A0J5PKZ7_ASPFM|tr|A0A0J5PRS9|A0A0J5PRS9_ASPFM|tr|A0A0J5PMP0|A0A0J5PMP0_ASPFM|tr|A0A0J5SQG5|A0A0J5SQG5_ASPFM|tr|A0A0J5Q1H9|A0A0J5Q1H9_ASPFM	http://amigo.geneontology.org/cgi-bin/amigo/term_details?term=GO:0022414
phosphate-containing compound metabolic process	Gene Ontology	GO:0006796	6	383	0.151228	0.280602	tr|A0A0J5PWF4|A0A0J5PWF4_ASPFM|tr|A0A0J5Q6L6|A0A0J5Q6L6_ASPFM|tr|A0A0J5PUK7|A0A0J5PUK7_ASPFM|tr|A0A0J5SQG5|A0A0J5SQG5_ASPFM|tr|A0A0J5PQL3|A0A0J5PQL3_ASPFM|tr|A0A0J5PRC9|A0A0J5PRC9_ASPFM	http://amigo.geneontology.org/cgi-bin/amigo/term_details?term=GO:0006796
purine ribonucleotide metabolic process	Gene Ontology	GO:0009150	2	73	0.152952	0.283391	tr|A0A0J5PQL3|A0A0J5PQL3_ASPFM|tr|A0A0J5SQG5|A0A0J5SQG5_ASPFM	http://amigo.geneontology.org/cgi-bin/amigo/term_details?term=GO:0009150
ribonucleoside triphosphate biosynthetic process	Gene Ontology	GO:0009201	1	17	0.1543	0.283841	tr|A0A0J5PQL3|A0A0J5PQL3_ASPFM	http://amigo.geneontology.org/cgi-bin/amigo/term_details?term=GO:0009201
cellular aldehyde metabolic process	Gene Ontology	GO:0006081	1	17	0.1543	0.283841	tr|A0A0J5PWF4|A0A0J5PWF4_ASPFM	http://amigo.geneontology.org/cgi-bin/amigo/term_details?term=GO:0006081
cellular metabolic compound salvage	Gene Ontology	GO:0043094	1	17	0.1543	0.283841	tr|A0A0J5PRM9|A0A0J5PRM9_ASPFM	http://amigo.geneontology.org/cgi-bin/amigo/term_details?term=GO:0043094
Golgi-associated vesicle	Gene Ontology	GO:0005798	1	17	0.1543	0.283841	tr|A0A0J5PZF9|A0A0J5PZF9_ASPFM	http://amigo.geneontology.org/cgi-bin/amigo/term_details?term=GO:0005798
regulation of cell communication	Gene Ontology	GO:0010646	2	74	0.156187	0.286492	tr|A0A0J5PMP0|A0A0J5PMP0_ASPFM|tr|A0A0J5SQG5|A0A0J5SQG5_ASPFM	http://amigo.geneontology.org/cgi-bin/amigo/term_details?term=GO:0010646
purine nucleotide metabolic process	Gene Ontology	GO:0006163	2	74	0.156187	0.286492	tr|A0A0J5PQL3|A0A0J5PQL3_ASPFM|tr|A0A0J5SQG5|A0A0J5SQG5_ASPFM	http://amigo.geneontology.org/cgi-bin/amigo/term_details?term=GO:0006163
protein modification process	Gene Ontology	GO:0036211	6	389	0.158991	0.290804	tr|A0A0J5PDH8|A0A0J5PDH8_ASPFM|tr|A0A0J5PVE5|A0A0J5PVE5_ASPFM|tr|A0A0J5SQG5|A0A0J5SQG5_ASPFM|tr|A0A0J5SQA8|A0A0J5SQA8_ASPFM|tr|A0A0J5Q1L6|A0A0J5Q1L6_ASPFM|tr|A0A0J5PMP0|A0A0J5PMP0_ASPFM	http://amigo.geneontology.org/cgi-bin/amigo/term_details?term=GO:0036211
cellular protein modification process	Gene Ontology	GO:0006464	6	389	0.158991	0.290804	tr|A0A0J5PDH8|A0A0J5PDH8_ASPFM|tr|A0A0J5PVE5|A0A0J5PVE5_ASPFM|tr|A0A0J5SQG5|A0A0J5SQG5_ASPFM|tr|A0A0J5SQA8|A0A0J5SQA8_ASPFM|tr|A0A0J5Q1L6|A0A0J5Q1L6_ASPFM|tr|A0A0J5PMP0|A0A0J5PMP0_ASPFM	http://amigo.geneontology.org/cgi-bin/amigo/term_details?term=GO:0006464
transcription factor binding	Gene Ontology	GO:0008134	1	18	0.162145	0.292819	tr|A0A0J5PMP0|A0A0J5PMP0_ASPFM	http://amigo.geneontology.org/cgi-bin/amigo/term_details?term=GO:0008134
cytoplasmic vesicle part	Gene Ontology	GO:0044433	1	18	0.162145	0.292819	tr|A0A0J5PZF9|A0A0J5PZF9_ASPFM	http://amigo.geneontology.org/cgi-bin/amigo/term_details?term=GO:0044433
regulation of cell septum assembly	Gene Ontology	GO:1901891	1	18	0.162145	0.292819	tr|A0A0J5PMP0|A0A0J5PMP0_ASPFM	http://amigo.geneontology.org/cgi-bin/amigo/term_details?term=GO:1901891
positive regulation of intracellular signal transduction	Gene Ontology	GO:1902533	1	18	0.162145	0.292819	tr|A0A0J5PMP0|A0A0J5PMP0_ASPFM	http://amigo.geneontology.org/cgi-bin/amigo/term_details?term=GO:1902533
glycogen metabolic process	Gene Ontology	GO:0005977	1	18	0.162145	0.292819	tr|A0A0J5PMP0|A0A0J5PMP0_ASPFM	http://amigo.geneontology.org/cgi-bin/amigo/term_details?term=GO:0005977
vesicle organization	Gene Ontology	GO:0016050	1	18	0.162145	0.292819	tr|A0A0J5PRS9|A0A0J5PRS9_ASPFM	http://amigo.geneontology.org/cgi-bin/amigo/term_details?term=GO:0016050
intramolecular oxidoreductase activity	Gene Ontology	GO:0016860	1	18	0.162145	0.292819	tr|A0A0J5Q6L6|A0A0J5Q6L6_ASPFM	http://amigo.geneontology.org/cgi-bin/amigo/term_details?term=GO:0016860
energy reserve metabolic process	Gene Ontology	GO:0006112	1	18	0.162145	0.292819	tr|A0A0J5PMP0|A0A0J5PMP0_ASPFM	http://amigo.geneontology.org/cgi-bin/amigo/term_details?term=GO:0006112
second-messenger-mediated signaling	Gene Ontology	GO:0019932	1	18	0.162145	0.292819	tr|A0A0J5SQG5|A0A0J5SQG5_ASPFM	http://amigo.geneontology.org/cgi-bin/amigo/term_details?term=GO:0019932
sporulation	Gene Ontology	GO:0043934	4	225	0.162397	0.292862	tr|A0A0J5PKZ7|A0A0J5PKZ7_ASPFM|tr|A0A0J5SQG5|A0A0J5SQG5_ASPFM|tr|A0A0J5PMP0|A0A0J5PMP0_ASPFM|tr|A0A0J5SCF2|A0A0J5SCF2_ASPFM	http://amigo.geneontology.org/cgi-bin/amigo/term_details?term=GO:0043934
phosphorus metabolic process	Gene Ontology	GO:0006793	6	392	0.162938	0.293426	tr|A0A0J5PWF4|A0A0J5PWF4_ASPFM|tr|A0A0J5Q6L6|A0A0J5Q6L6_ASPFM|tr|A0A0J5PUK7|A0A0J5PUK7_ASPFM|tr|A0A0J5SQG5|A0A0J5SQG5_ASPFM|tr|A0A0J5PQL3|A0A0J5PQL3_ASPFM|tr|A0A0J5PRC9|A0A0J5PRC9_ASPFM	http://amigo.geneontology.org/cgi-bin/amigo/term_details?term=GO:0006793
anion binding	Gene Ontology	GO:0043168	2	77	0.165971	0.296836	tr|A0A0J5PMP0|A0A0J5PMP0_ASPFM|tr|A0A0J5SCF2|A0A0J5SCF2_ASPFM	http://amigo.geneontology.org/cgi-bin/amigo/term_details?term=GO:0043168
membrane protein complex	Gene Ontology	GO:0098796	3	150	0.168723	0.296836	tr|A0A0J5Q5A4|A0A0J5Q5A4_ASPFM|tr|A0A0J5PQL3|A0A0J5PQL3_ASPFM|tr|A0A0J5PZF9|A0A0J5PZF9_ASPFM	http://amigo.geneontology.org/cgi-bin/amigo/term_details?term=GO:0098796
positive regulation of transcription, DNA-templated	Gene Ontology	GO:0045893	2	78	0.169257	0.296836	tr|A0A0J5SQG5|A0A0J5SQG5_ASPFM|tr|A0A0J5PIQ5|A0A0J5PIQ5_ASPFM	http://amigo.geneontology.org/cgi-bin/amigo/term_details?term=GO:0045893
regulation of reproductive process	Gene Ontology	GO:2000241	2	78	0.169257	0.296836	tr|A0A0J5PMP0|A0A0J5PMP0_ASPFM|tr|A0A0J5SQG5|A0A0J5SQG5_ASPFM	http://amigo.geneontology.org/cgi-bin/amigo/term_details?term=GO:2000241
positive regulation of RNA biosynthetic process	Gene Ontology	GO:1902680	2	78	0.169257	0.296836	tr|A0A0J5SQG5|A0A0J5SQG5_ASPFM|tr|A0A0J5PIQ5|A0A0J5PIQ5_ASPFM	http://amigo.geneontology.org/cgi-bin/amigo/term_details?term=GO:1902680
positive regulation of nucleic acid-templated transcription	Gene Ontology	GO:1903508	2	78	0.169257	0.296836	tr|A0A0J5SQG5|A0A0J5SQG5_ASPFM|tr|A0A0J5PIQ5|A0A0J5PIQ5_ASPFM	http://amigo.geneontology.org/cgi-bin/amigo/term_details?term=GO:1903508
response to pheromone involved in conjugation with cellular fusion	Gene Ontology	GO:0000749	1	19	0.169918	0.296836	tr|A0A0J5SQG5|A0A0J5SQG5_ASPFM	http://amigo.geneontology.org/cgi-bin/amigo/term_details?term=GO:0000749
intrinsic component of plasma membrane	Gene Ontology	GO:0031226	1	19	0.169918	0.296836	tr|A0A0J5Q4T5|A0A0J5Q4T5_ASPFM	http://amigo.geneontology.org/cgi-bin/amigo/term_details?term=GO:0031226
nucleoside triphosphate biosynthetic process	Gene Ontology	GO:0009142	1	19	0.169918	0.296836	tr|A0A0J5PQL3|A0A0J5PQL3_ASPFM	http://amigo.geneontology.org/cgi-bin/amigo/term_details?term=GO:0009142
contractile ring contraction	Gene Ontology	GO:0036213	1	19	0.169918	0.296836	tr|A0A0J5PMP0|A0A0J5PMP0_ASPFM	http://amigo.geneontology.org/cgi-bin/amigo/term_details?term=GO:0036213
cellular response to nutrient	Gene Ontology	GO:0031670	1	19	0.169918	0.296836	tr|A0A0J5SQG5|A0A0J5SQG5_ASPFM	http://amigo.geneontology.org/cgi-bin/amigo/term_details?term=GO:0031670
glutamine family amino acid biosynthetic process	Gene Ontology	GO:0009084	1	19	0.169918	0.296836	tr|A0A0J5SCF2|A0A0J5SCF2_ASPFM	http://amigo.geneontology.org/cgi-bin/amigo/term_details?term=GO:0009084
actomyosin contractile ring contraction	Gene Ontology	GO:0000916	1	19	0.169918	0.296836	tr|A0A0J5PMP0|A0A0J5PMP0_ASPFM	http://amigo.geneontology.org/cgi-bin/amigo/term_details?term=GO:0000916
cellular protein complex disassembly	Gene Ontology	GO:0043624	1	19	0.169918	0.296836	tr|A0A0J5PIQ5|A0A0J5PIQ5_ASPFM	http://amigo.geneontology.org/cgi-bin/amigo/term_details?term=GO:0043624
sequence-specific double-stranded DNA binding	Gene Ontology	GO:1990837	1	19	0.169918	0.296836	tr|A0A0J5PMP0|A0A0J5PMP0_ASPFM	http://amigo.geneontology.org/cgi-bin/amigo/term_details?term=GO:1990837
regulation of asexual sporulation resulting in formation of a cellular spore	Gene Ontology	GO:0043943	1	19	0.169918	0.296836	tr|A0A0J5SQG5|A0A0J5SQG5_ASPFM	http://amigo.geneontology.org/cgi-bin/amigo/term_details?term=GO:0043943
fungal-type cell wall polysaccharide biosynthetic process	Gene Ontology	GO:0051278	1	19	0.169918	0.296836	tr|A0A0J5PMP0|A0A0J5PMP0_ASPFM	http://amigo.geneontology.org/cgi-bin/amigo/term_details?term=GO:0051278
negative regulation of catalytic activity	Gene Ontology	GO:0043086	1	19	0.169918	0.296836	tr|A0A0J5PMP0|A0A0J5PMP0_ASPFM	http://amigo.geneontology.org/cgi-bin/amigo/term_details?term=GO:0043086
regulation of mitotic cytokinetic process	Gene Ontology	GO:1903436	1	19	0.169918	0.296836	tr|A0A0J5PMP0|A0A0J5PMP0_ASPFM	http://amigo.geneontology.org/cgi-bin/amigo/term_details?term=GO:1903436
ATPase activity, coupled to transmembrane movement of ions, rotational mechanism	Gene Ontology	GO:0044769	1	19	0.169918	0.296836	tr|A0A0J5PQL3|A0A0J5PQL3_ASPFM	http://amigo.geneontology.org/cgi-bin/amigo/term_details?term=GO:0044769
mitotic DNA damage checkpoint	Gene Ontology	GO:0044773	1	19	0.169918	0.296836	tr|A0A0J5PMP0|A0A0J5PMP0_ASPFM	http://amigo.geneontology.org/cgi-bin/amigo/term_details?term=GO:0044773
amide transport	Gene Ontology	GO:0042886	1	19	0.169918	0.296836	tr|A0A0J5Q4T5|A0A0J5Q4T5_ASPFM	http://amigo.geneontology.org/cgi-bin/amigo/term_details?term=GO:0042886
cellular response to stress	Gene Ontology	GO:0033554	6	399	0.172314	0.300215	tr|A0A0J5PHI4|A0A0J5PHI4_ASPFM|tr|A0A0J5PNA9|A0A0J5PNA9_ASPFM|tr|A0A0J5SQG5|A0A0J5SQG5_ASPFM|tr|A0A0J5PR80|A0A0J5PR80_ASPFM|tr|A0A0J5PMP0|A0A0J5PMP0_ASPFM|tr|A0A0J5Q3U7|A0A0J5Q3U7_ASPFM	http://amigo.geneontology.org/cgi-bin/amigo/term_details?term=GO:0033554
ribonucleotide metabolic process	Gene Ontology	GO:0009259	2	79	0.172553	0.300215	tr|A0A0J5PQL3|A0A0J5PQL3_ASPFM|tr|A0A0J5SQG5|A0A0J5SQG5_ASPFM	http://amigo.geneontology.org/cgi-bin/amigo/term_details?term=GO:0009259
cellular response to oxidative stress	Gene Ontology	GO:0034599	2	79	0.172553	0.300215	tr|A0A0J5Q3U7|A0A0J5Q3U7_ASPFM|tr|A0A0J5SQG5|A0A0J5SQG5_ASPFM	http://amigo.geneontology.org/cgi-bin/amigo/term_details?term=GO:0034599
cellular response to drug	Gene Ontology	GO:0035690	3	152	0.173275	0.301063	tr|A0A0J5PRS9|A0A0J5PRS9_ASPFM|tr|A0A0J5PRM9|A0A0J5PRM9_ASPFM|tr|A0A0J5PV51|A0A0J5PV51_ASPFM	http://amigo.geneontology.org/cgi-bin/amigo/term_details?term=GO:0035690
maintenance of location in cell	Gene Ontology	GO:0051651	1	20	0.17762	0.302472	tr|A0A0J5PMP0|A0A0J5PMP0_ASPFM	http://amigo.geneontology.org/cgi-bin/amigo/term_details?term=GO:0051651
regulation of mitotic cytokinesis	Gene Ontology	GO:1902412	1	20	0.17762	0.302472	tr|A0A0J5PMP0|A0A0J5PMP0_ASPFM	http://amigo.geneontology.org/cgi-bin/amigo/term_details?term=GO:1902412
signal transduction involved in conjugation with cellular fusion	Gene Ontology	GO:0032005	1	20	0.17762	0.302472	tr|A0A0J5SQG5|A0A0J5SQG5_ASPFM	http://amigo.geneontology.org/cgi-bin/amigo/term_details?term=GO:0032005
GTPase regulator activity	Gene Ontology	GO:0030695	1	20	0.17762	0.302472	tr|A0A0J5PVS4|A0A0J5PVS4_ASPFM	http://amigo.geneontology.org/cgi-bin/amigo/term_details?term=GO:0030695
peptide binding	Gene Ontology	GO:0042277	1	20	0.17762	0.302472	tr|A0A0J5PF72|A0A0J5PF72_ASPFM	http://amigo.geneontology.org/cgi-bin/amigo/term_details?term=GO:0042277
organophosphate ester transport	Gene Ontology	GO:0015748	1	20	0.17762	0.302472	tr|A0A0J5Q2G5|A0A0J5Q2G5_ASPFM	http://amigo.geneontology.org/cgi-bin/amigo/term_details?term=GO:0015748
fungal-type cell wall polysaccharide metabolic process	Gene Ontology	GO:0071966	1	20	0.17762	0.302472	tr|A0A0J5PMP0|A0A0J5PMP0_ASPFM	http://amigo.geneontology.org/cgi-bin/amigo/term_details?term=GO:0071966
response to nutrient	Gene Ontology	GO:0007584	1	20	0.17762	0.302472	tr|A0A0J5SQG5|A0A0J5SQG5_ASPFM	http://amigo.geneontology.org/cgi-bin/amigo/term_details?term=GO:0007584
exocytosis	Gene Ontology	GO:0006887	1	20	0.17762	0.302472	tr|A0A0J5PRS9|A0A0J5PRS9_ASPFM	http://amigo.geneontology.org/cgi-bin/amigo/term_details?term=GO:0006887
regulation of response to nutrient levels	Gene Ontology	GO:0032107	1	20	0.17762	0.302472	tr|A0A0J5PHI4|A0A0J5PHI4_ASPFM	http://amigo.geneontology.org/cgi-bin/amigo/term_details?term=GO:0032107
integral component of endoplasmic reticulum membrane	Gene Ontology	GO:0030176	1	20	0.17762	0.302472	tr|A0A0J5PHI4|A0A0J5PHI4_ASPFM	http://amigo.geneontology.org/cgi-bin/amigo/term_details?term=GO:0030176
microtubule	Gene Ontology	GO:0005874	1	20	0.17762	0.302472	tr|A0A0J5PKZ7|A0A0J5PKZ7_ASPFM	http://amigo.geneontology.org/cgi-bin/amigo/term_details?term=GO:0005874
cytosolic small ribosomal subunit	Gene Ontology	GO:0022627	1	20	0.17762	0.302472	tr|A0A0J5Q4L0|A0A0J5Q4L0_ASPFM	http://amigo.geneontology.org/cgi-bin/amigo/term_details?term=GO:0022627
regulation of response to extracellular stimulus	Gene Ontology	GO:0032104	1	20	0.17762	0.302472	tr|A0A0J5PHI4|A0A0J5PHI4_ASPFM	http://amigo.geneontology.org/cgi-bin/amigo/term_details?term=GO:0032104
growth	Gene Ontology	GO:0040007	5	317	0.177906	0.302559	tr|A0A0J5PNA9|A0A0J5PNA9_ASPFM|tr|A0A0J5PMP0|A0A0J5PMP0_ASPFM|tr|A0A0J5SQG5|A0A0J5SQG5_ASPFM|tr|A0A0J5Q1B9|A0A0J5Q1B9_ASPFM|tr|A0A0J5PHI4|A0A0J5PHI4_ASPFM	http://amigo.geneontology.org/cgi-bin/amigo/term_details?term=GO:0040007
cellular response to abiotic stimulus	Gene Ontology	GO:0071214	2	81	0.179178	0.303917	tr|A0A0J5PMP0|A0A0J5PMP0_ASPFM|tr|A0A0J5PHI4|A0A0J5PHI4_ASPFM	http://amigo.geneontology.org/cgi-bin/amigo/term_details?term=GO:0071214
ascospore formation	Gene Ontology	GO:0030437	2	81	0.179178	0.303917	tr|A0A0J5PMP0|A0A0J5PMP0_ASPFM|tr|A0A0J5SQG5|A0A0J5SQG5_ASPFM	http://amigo.geneontology.org/cgi-bin/amigo/term_details?term=GO:0030437
nucleic acid binding	Gene Ontology	GO:0003676	9	675	0.181006	0.306612	tr|A0A0J5SKW5|A0A0J5SKW5_ASPFM|tr|A0A0J5PKY1|A0A0J5PKY1_ASPFM|tr|A0A0J5PNA9|A0A0J5PNA9_ASPFM|tr|A0A0J5Q0I9|A0A0J5Q0I9_ASPFM|tr|A0A0J5PR80|A0A0J5PR80_ASPFM|tr|A0A0J5Q4L0|A0A0J5Q4L0_ASPFM|tr|A0A0J5PNE9|A0A0J5PNE9_ASPFM|tr|A0A0J5PMP0|A0A0J5PMP0_ASPFM|tr|A0A0J5PIQ5|A0A0J5PIQ5_ASPFM	http://amigo.geneontology.org/cgi-bin/amigo/term_details?term=GO:0003676
cellular component morphogenesis	Gene Ontology	GO:0032989	2	82	0.182506	0.308745	tr|A0A0J5Q0U9|A0A0J5Q0U9_ASPFM|tr|A0A0J5SQG5|A0A0J5SQG5_ASPFM	http://amigo.geneontology.org/cgi-bin/amigo/term_details?term=GO:0032989
circadian rhythm	Gene Ontology	GO:0007623	1	21	0.185251	0.309716	tr|A0A0J5SQG5|A0A0J5SQG5_ASPFM	http://amigo.geneontology.org/cgi-bin/amigo/term_details?term=GO:0007623
rhythmic process	Gene Ontology	GO:0048511	1	21	0.185251	0.309716	tr|A0A0J5SQG5|A0A0J5SQG5_ASPFM	http://amigo.geneontology.org/cgi-bin/amigo/term_details?term=GO:0048511
intrinsic component of mitochondrial membrane	Gene Ontology	GO:0098573	1	21	0.185251	0.309716	tr|A0A0J5Q5A4|A0A0J5Q5A4_ASPFM	http://amigo.geneontology.org/cgi-bin/amigo/term_details?term=GO:0098573
coated membrane	Gene Ontology	GO:0048475	1	21	0.185251	0.309716	tr|A0A0J5PZF9|A0A0J5PZF9_ASPFM	http://amigo.geneontology.org/cgi-bin/amigo/term_details?term=GO:0048475
regulation of cytokinetic process	Gene Ontology	GO:0032954	1	21	0.185251	0.309716	tr|A0A0J5PMP0|A0A0J5PMP0_ASPFM	http://amigo.geneontology.org/cgi-bin/amigo/term_details?term=GO:0032954
membrane coat	Gene Ontology	GO:0030117	1	21	0.185251	0.309716	tr|A0A0J5PZF9|A0A0J5PZF9_ASPFM	http://amigo.geneontology.org/cgi-bin/amigo/term_details?term=GO:0030117
cellular response to pheromone	Gene Ontology	GO:0071444	1	21	0.185251	0.309716	tr|A0A0J5SQG5|A0A0J5SQG5_ASPFM	http://amigo.geneontology.org/cgi-bin/amigo/term_details?term=GO:0071444
integral component of mitochondrial membrane	Gene Ontology	GO:0032592	1	21	0.185251	0.309716	tr|A0A0J5Q5A4|A0A0J5Q5A4_ASPFM	http://amigo.geneontology.org/cgi-bin/amigo/term_details?term=GO:0032592
ribosomal large subunit assembly	Gene Ontology	GO:0000027	1	21	0.185251	0.309716	tr|A0A0J5PKY1|A0A0J5PKY1_ASPFM	http://amigo.geneontology.org/cgi-bin/amigo/term_details?term=GO:0000027
endoplasmic reticulum membrane	Gene Ontology	GO:0005789	2	83	0.185843	0.310301	tr|A0A0J5SQG5|A0A0J5SQG5_ASPFM|tr|A0A0J5PHI4|A0A0J5PHI4_ASPFM	http://amigo.geneontology.org/cgi-bin/amigo/term_details?term=GO:0005789
binding	Gene Ontology	GO:0005488	24	2140	0.187535	0.31272	tr|A0A0J5PNA9|A0A0J5PNA9_ASPFM|tr|A0A0J5SQG5|A0A0J5SQG5_ASPFM|tr|A0A0J5Q166|A0A0J5Q166_ASPFM|tr|A0A0J5Q3U7|A0A0J5Q3U7_ASPFM|tr|A0A0J5STT4|A0A0J5STT4_ASPFM|tr|A0A0J5PHI4|A0A0J5PHI4_ASPFM|tr|A0A0J5PV51|A0A0J5PV51_ASPFM|tr|A0A0J5PMM3|A0A0J5PMM3_ASPFM|tr|A0A0J5PRC9|A0A0J5PRC9_ASPFM|tr|A0A0J5Q4L0|A0A0J5Q4L0_ASPFM|tr|A0A0J5PKY1|A0A0J5PKY1_ASPFM|tr|A0A0J5PTV6|A0A0J5PTV6_ASPFM|tr|A0A0J5SCF2|A0A0J5SCF2_AS…	http://amigo.geneontology.org/cgi-bin/amigo/term_details?term=GO:0005488
macromolecule metabolic process	Gene Ontology	GO:0043170	18	1545	0.189102	0.313778	tr|A0A0J5PNE9|A0A0J5PNE9_ASPFM|tr|A0A0J5PDH8|A0A0J5PDH8_ASPFM|tr|A0A0J5Q4L0|A0A0J5Q4L0_ASPFM|tr|A0A0J5PKY1|A0A0J5PKY1_ASPFM|tr|A0A0J5Q2W2|A0A0J5Q2W2_ASPFM|tr|A0A0J5Q0I9|A0A0J5Q0I9_ASPFM|tr|A0A0J5PVE5|A0A0J5PVE5_ASPFM|tr|A0A0J5SQG5|A0A0J5SQG5_ASPFM|tr|A0A0J5PUB3|A0A0J5PUB3_ASPFM|tr|A0A0J5PNA9|A0A0J5PNA9_ASPFM|tr|A0A0J5PR80|A0A0J5PR80_ASPFM|tr|A0A0J5PI11|A0A0J5PI11_ASPFM|tr|A0A0J5SQA8|A0A0J5SQA8_AS…	http://amigo.geneontology.org/cgi-bin/amigo/term_details?term=GO:0043170
meiotic cell cycle process	Gene Ontology	GO:1903046	3	160	0.191823	0.313778	tr|A0A0J5PKZ7|A0A0J5PKZ7_ASPFM|tr|A0A0J5PMP0|A0A0J5PMP0_ASPFM|tr|A0A0J5SQG5|A0A0J5SQG5_ASPFM	http://amigo.geneontology.org/cgi-bin/amigo/term_details?term=GO:1903046
sporulation resulting in formation of a cellular spore	Gene Ontology	GO:0030435	3	160	0.191823	0.313778	tr|A0A0J5PKZ7|A0A0J5PKZ7_ASPFM|tr|A0A0J5PMP0|A0A0J5PMP0_ASPFM|tr|A0A0J5SQG5|A0A0J5SQG5_ASPFM	http://amigo.geneontology.org/cgi-bin/amigo/term_details?term=GO:0030435
positive regulation of macromolecule biosynthetic process	Gene Ontology	GO:0010557	2	85	0.192542	0.313778	tr|A0A0J5SQG5|A0A0J5SQG5_ASPFM|tr|A0A0J5PIQ5|A0A0J5PIQ5_ASPFM	http://amigo.geneontology.org/cgi-bin/amigo/term_details?term=GO:0010557
regulation of G2/M transition of mitotic cell cycle	Gene Ontology	GO:0010389	1	22	0.192812	0.313778	tr|A0A0J5PMP0|A0A0J5PMP0_ASPFM	http://amigo.geneontology.org/cgi-bin/amigo/term_details?term=GO:0010389
DNA damage checkpoint	Gene Ontology	GO:0000077	1	22	0.192812	0.313778	tr|A0A0J5PMP0|A0A0J5PMP0_ASPFM	http://amigo.geneontology.org/cgi-bin/amigo/term_details?term=GO:0000077
proton-transporting two-sector ATPase complex	Gene Ontology	GO:0016469	1	22	0.192812	0.313778	tr|A0A0J5PQL3|A0A0J5PQL3_ASPFM	http://amigo.geneontology.org/cgi-bin/amigo/term_details?term=GO:0016469
mitotic DNA integrity checkpoint	Gene Ontology	GO:0044774	1	22	0.192812	0.313778	tr|A0A0J5PMP0|A0A0J5PMP0_ASPFM	http://amigo.geneontology.org/cgi-bin/amigo/term_details?term=GO:0044774
regulation of carbohydrate metabolic process	Gene Ontology	GO:0006109	1	22	0.192812	0.313778	tr|A0A0J5PMP0|A0A0J5PMP0_ASPFM	http://amigo.geneontology.org/cgi-bin/amigo/term_details?term=GO:0006109
regulation of conidium formation	Gene Ontology	GO:0075306	1	22	0.192812	0.313778	tr|A0A0J5SQG5|A0A0J5SQG5_ASPFM	http://amigo.geneontology.org/cgi-bin/amigo/term_details?term=GO:0075306
drug metabolic process	Gene Ontology	GO:0017144	1	22	0.192812	0.313778	tr|A0A0J5PRM9|A0A0J5PRM9_ASPFM	http://amigo.geneontology.org/cgi-bin/amigo/term_details?term=GO:0017144
guanyl-nucleotide exchange factor activity	Gene Ontology	GO:0005085	1	22	0.192812	0.313778	tr|A0A0J5PIQ5|A0A0J5PIQ5_ASPFM	http://amigo.geneontology.org/cgi-bin/amigo/term_details?term=GO:0005085
cell wall polysaccharide biosynthetic process	Gene Ontology	GO:0070592	1	22	0.192812	0.313778	tr|A0A0J5PMP0|A0A0J5PMP0_ASPFM	http://amigo.geneontology.org/cgi-bin/amigo/term_details?term=GO:0070592
microtubule-based movement	Gene Ontology	GO:0007018	1	22	0.192812	0.313778	tr|A0A0J5PKZ7|A0A0J5PKZ7_ASPFM	http://amigo.geneontology.org/cgi-bin/amigo/term_details?term=GO:0007018
regulation of response to external stimulus	Gene Ontology	GO:0032101	1	22	0.192812	0.313778	tr|A0A0J5PHI4|A0A0J5PHI4_ASPFM	http://amigo.geneontology.org/cgi-bin/amigo/term_details?term=GO:0032101
regulation of cell cycle G2/M phase transition	Gene Ontology	GO:1902749	1	22	0.192812	0.313778	tr|A0A0J5PMP0|A0A0J5PMP0_ASPFM	http://amigo.geneontology.org/cgi-bin/amigo/term_details?term=GO:1902749
regulation of cellular protein localization	Gene Ontology	GO:1903827	1	22	0.192812	0.313778	tr|A0A0J5SQG5|A0A0J5SQG5_ASPFM	http://amigo.geneontology.org/cgi-bin/amigo/term_details?term=GO:1903827
positive regulation of gene expression	Gene Ontology	GO:0010628	2	86	0.195904	0.31557	tr|A0A0J5SQG5|A0A0J5SQG5_ASPFM|tr|A0A0J5PIQ5|A0A0J5PIQ5_ASPFM	http://amigo.geneontology.org/cgi-bin/amigo/term_details?term=GO:0010628
cellular response to chemical stimulus	Gene Ontology	GO:0070887	5	329	0.196975	0.31557	tr|A0A0J5PRS9|A0A0J5PRS9_ASPFM|tr|A0A0J5Q3U7|A0A0J5Q3U7_ASPFM|tr|A0A0J5SQG5|A0A0J5SQG5_ASPFM|tr|A0A0J5PV51|A0A0J5PV51_ASPFM|tr|A0A0J5PRM9|A0A0J5PRM9_ASPFM	http://amigo.geneontology.org/cgi-bin/amigo/term_details?term=GO:0070887
cellular response to stimulus	Gene Ontology	GO:0051716	9	690	0.197357	0.31557	tr|A0A0J5PRM9|A0A0J5PRM9_ASPFM|tr|A0A0J5PHI4|A0A0J5PHI4_ASPFM|tr|A0A0J5PNA9|A0A0J5PNA9_ASPFM|tr|A0A0J5SQG5|A0A0J5SQG5_ASPFM|tr|A0A0J5PV51|A0A0J5PV51_ASPFM|tr|A0A0J5PR80|A0A0J5PR80_ASPFM|tr|A0A0J5PRS9|A0A0J5PRS9_ASPFM|tr|A0A0J5PMP0|A0A0J5PMP0_ASPFM|tr|A0A0J5Q3U7|A0A0J5Q3U7_ASPFM	http://amigo.geneontology.org/cgi-bin/amigo/term_details?term=GO:0051716
nuclear outer membrane-endoplasmic reticulum membrane network	Gene Ontology	GO:0042175	2	87	0.199274	0.31557	tr|A0A0J5SQG5|A0A0J5SQG5_ASPFM|tr|A0A0J5PHI4|A0A0J5PHI4_ASPFM	http://amigo.geneontology.org/cgi-bin/amigo/term_details?term=GO:0042175
mRNA metabolic process	Gene Ontology	GO:0016071	2	87	0.199274	0.31557	tr|A0A0J5PNE9|A0A0J5PNE9_ASPFM|tr|A0A0J5SKW5|A0A0J5SKW5_ASPFM	http://amigo.geneontology.org/cgi-bin/amigo/term_details?term=GO:0016071
post-Golgi vesicle-mediated transport	Gene Ontology	GO:0006892	1	23	0.200304	0.31557	tr|A0A0J5PRS9|A0A0J5PRS9_ASPFM	http://amigo.geneontology.org/cgi-bin/amigo/term_details?term=GO:0006892
regulation of cytokinesis	Gene Ontology	GO:0032465	1	23	0.200304	0.31557	tr|A0A0J5PMP0|A0A0J5PMP0_ASPFM	http://amigo.geneontology.org/cgi-bin/amigo/term_details?term=GO:0032465
polymeric cytoskeletal fiber	Gene Ontology	GO:0099513	1	23	0.200304	0.31557	tr|A0A0J5PKZ7|A0A0J5PKZ7_ASPFM	http://amigo.geneontology.org/cgi-bin/amigo/term_details?term=GO:0099513
response to pheromone	Gene Ontology	GO:0019236	1	23	0.200304	0.31557	tr|A0A0J5SQG5|A0A0J5SQG5_ASPFM	http://amigo.geneontology.org/cgi-bin/amigo/term_details?term=GO:0019236
supramolecular fiber	Gene Ontology	GO:0099512	1	23	0.200304	0.31557	tr|A0A0J5PKZ7|A0A0J5PKZ7_ASPFM	http://amigo.geneontology.org/cgi-bin/amigo/term_details?term=GO:0099512
pyrimidine-containing compound biosynthetic process	Gene Ontology	GO:0072528	1	23	0.200304	0.31557	tr|A0A0J5PRM9|A0A0J5PRM9_ASPFM	http://amigo.geneontology.org/cgi-bin/amigo/term_details?term=GO:0072528
protein modification by small protein removal	Gene Ontology	GO:0070646	1	23	0.200304	0.31557	tr|A0A0J5PVE5|A0A0J5PVE5_ASPFM	http://amigo.geneontology.org/cgi-bin/amigo/term_details?term=GO:0070646
G-protein coupled receptor signaling pathway	Gene Ontology	GO:0007186	1	23	0.200304	0.31557	tr|A0A0J5SQG5|A0A0J5SQG5_ASPFM	http://amigo.geneontology.org/cgi-bin/amigo/term_details?term=GO:0007186
cellular bud tip	Gene Ontology	GO:0005934	1	23	0.200304	0.31557	tr|A0A0J5PRS9|A0A0J5PRS9_ASPFM	http://amigo.geneontology.org/cgi-bin/amigo/term_details?term=GO:0005934
Golgi subcompartment	Gene Ontology	GO:0098791	1	23	0.200304	0.31557	tr|A0A0J5PV51|A0A0J5PV51_ASPFM	http://amigo.geneontology.org/cgi-bin/amigo/term_details?term=GO:0098791
protein complex disassembly	Gene Ontology	GO:0043241	1	23	0.200304	0.31557	tr|A0A0J5PIQ5|A0A0J5PIQ5_ASPFM	http://amigo.geneontology.org/cgi-bin/amigo/term_details?term=GO:0043241
iron ion homeostasis	Gene Ontology	GO:0055072	1	23	0.200304	0.31557	tr|A0A0J5Q3U7|A0A0J5Q3U7_ASPFM	http://amigo.geneontology.org/cgi-bin/amigo/term_details?term=GO:0055072
exit from mitosis	Gene Ontology	GO:0010458	1	23	0.200304	0.31557	tr|A0A0J5PMP0|A0A0J5PMP0_ASPFM	http://amigo.geneontology.org/cgi-bin/amigo/term_details?term=GO:0010458
regulation of cellular catabolic process	Gene Ontology	GO:0031329	1	23	0.200304	0.31557	tr|A0A0J5PUB3|A0A0J5PUB3_ASPFM	http://amigo.geneontology.org/cgi-bin/amigo/term_details?term=GO:0031329
hydrogen ion transmembrane transport	Gene Ontology	GO:1902600	1	23	0.200304	0.31557	tr|A0A0J5PQL3|A0A0J5PQL3_ASPFM	http://amigo.geneontology.org/cgi-bin/amigo/term_details?term=GO:1902600
cellular iron ion homeostasis	Gene Ontology	GO:0006879	1	23	0.200304	0.31557	tr|A0A0J5Q3U7|A0A0J5Q3U7_ASPFM	http://amigo.geneontology.org/cgi-bin/amigo/term_details?term=GO:0006879
mitochondrial respiratory chain complex assembly	Gene Ontology	GO:0033108	1	23	0.200304	0.31557	tr|A0A0J5PEJ8|A0A0J5PEJ8_ASPFM	http://amigo.geneontology.org/cgi-bin/amigo/term_details?term=GO:0033108
movement of cell or subcellular component	Gene Ontology	GO:0006928	1	23	0.200304	0.31557	tr|A0A0J5PKZ7|A0A0J5PKZ7_ASPFM	http://amigo.geneontology.org/cgi-bin/amigo/term_details?term=GO:0006928
regulation of exit from mitosis	Gene Ontology	GO:0007096	1	23	0.200304	0.31557	tr|A0A0J5PMP0|A0A0J5PMP0_ASPFM	http://amigo.geneontology.org/cgi-bin/amigo/term_details?term=GO:0007096
barrier septum assembly	Gene Ontology	GO:0000917	1	23	0.200304	0.31557	tr|A0A0J5PMP0|A0A0J5PMP0_ASPFM	http://amigo.geneontology.org/cgi-bin/amigo/term_details?term=GO:0000917
response to host defenses	Gene Ontology	GO:0052200	1	23	0.200304	0.31557	tr|A0A0J5SQG5|A0A0J5SQG5_ASPFM	http://amigo.geneontology.org/cgi-bin/amigo/term_details?term=GO:0052200
response to abiotic stimulus	Gene Ontology	GO:0009628	3	164	0.201283	0.316725	tr|A0A0J5PMP0|A0A0J5PMP0_ASPFM|tr|A0A0J5SQG5|A0A0J5SQG5_ASPFM|tr|A0A0J5PHI4|A0A0J5PHI4_ASPFM	http://amigo.geneontology.org/cgi-bin/amigo/term_details?term=GO:0009628
response to drug	Gene Ontology	GO:0042493	3	165	0.203666	0.319426	tr|A0A0J5PRS9|A0A0J5PRS9_ASPFM|tr|A0A0J5PRM9|A0A0J5PRM9_ASPFM|tr|A0A0J5PV51|A0A0J5PV51_ASPFM	http://amigo.geneontology.org/cgi-bin/amigo/term_details?term=GO:0042493
multi-organism process	Gene Ontology	GO:0051704	5	334	0.205127	0.319426	tr|A0A0J5PKZ7|A0A0J5PKZ7_ASPFM|tr|A0A0J5PMP0|A0A0J5PMP0_ASPFM|tr|A0A0J5SQG5|A0A0J5SQG5_ASPFM|tr|A0A0J5Q1H9|A0A0J5Q1H9_ASPFM|tr|A0A0J5PHI4|A0A0J5PHI4_ASPFM	http://amigo.geneontology.org/cgi-bin/amigo/term_details?term=GO:0051704
cell development	Gene Ontology	GO:0048468	2	89	0.206034	0.319426	tr|A0A0J5PMP0|A0A0J5PMP0_ASPFM|tr|A0A0J5SQG5|A0A0J5SQG5_ASPFM	http://amigo.geneontology.org/cgi-bin/amigo/term_details?term=GO:0048468
protein transporter activity	Gene Ontology	GO:0008565	1	24	0.207727	0.319426	tr|A0A0J5PH08|A0A0J5PH08_ASPFM	http://amigo.geneontology.org/cgi-bin/amigo/term_details?term=GO:0008565
translational initiation	Gene Ontology	GO:0006413	1	24	0.207727	0.319426	tr|A0A0J5PI11|A0A0J5PI11_ASPFM	http://amigo.geneontology.org/cgi-bin/amigo/term_details?term=GO:0006413
oxidoreductase activity, acting on single donors with incorporation of molecular oxygen	Gene Ontology	GO:0016701	1	24	0.207727	0.319426	tr|A0A0J5PVE0|A0A0J5PVE0_ASPFM	http://amigo.geneontology.org/cgi-bin/amigo/term_details?term=GO:0016701
chitin metabolic process	Gene Ontology	GO:0006030	1	24	0.207727	0.319426	tr|A0A0J5PMP0|A0A0J5PMP0_ASPFM	http://amigo.geneontology.org/cgi-bin/amigo/term_details?term=GO:0006030
prenyltransferase activity	Gene Ontology	GO:0004659	1	24	0.207727	0.319426	tr|A0A0J5PUK7|A0A0J5PUK7_ASPFM	http://amigo.geneontology.org/cgi-bin/amigo/term_details?term=GO:0004659
response to defenses of other organism involved in symbiotic interaction	Gene Ontology	GO:0052173	1	24	0.207727	0.319426	tr|A0A0J5SQG5|A0A0J5SQG5_ASPFM	http://amigo.geneontology.org/cgi-bin/amigo/term_details?term=GO:0052173
anion transmembrane transporter activity	Gene Ontology	GO:0008509	1	24	0.207727	0.319426	tr|A0A0J5PN06|A0A0J5PN06_ASPFM	http://amigo.geneontology.org/cgi-bin/amigo/term_details?term=GO:0008509
transcription regulatory region DNA binding	Gene Ontology	GO:0044212	1	24	0.207727	0.319426	tr|A0A0J5PIQ5|A0A0J5PIQ5_ASPFM	http://amigo.geneontology.org/cgi-bin/amigo/term_details?term=GO:0044212
establishment or maintenance of cell polarity regulating cell shape	Gene Ontology	GO:0071963	1	24	0.207727	0.319426	tr|A0A0J5SQG5|A0A0J5SQG5_ASPFM	http://amigo.geneontology.org/cgi-bin/amigo/term_details?term=GO:0071963
regulatory region DNA binding	Gene Ontology	GO:0000975	1	24	0.207727	0.319426	tr|A0A0J5PIQ5|A0A0J5PIQ5_ASPFM	http://amigo.geneontology.org/cgi-bin/amigo/term_details?term=GO:0000975
response to host	Gene Ontology	GO:0075136	1	24	0.207727	0.319426	tr|A0A0J5SQG5|A0A0J5SQG5_ASPFM	http://amigo.geneontology.org/cgi-bin/amigo/term_details?term=GO:0075136
negative regulation of nuclear division	Gene Ontology	GO:0051784	1	24	0.207727	0.319426	tr|A0A0J5PMP0|A0A0J5PMP0_ASPFM	http://amigo.geneontology.org/cgi-bin/amigo/term_details?term=GO:0051784
intrinsic component of endoplasmic reticulum membrane	Gene Ontology	GO:0031227	1	24	0.207727	0.319426	tr|A0A0J5PHI4|A0A0J5PHI4_ASPFM	http://amigo.geneontology.org/cgi-bin/amigo/term_details?term=GO:0031227
regulatory region nucleic acid binding	Gene Ontology	GO:0001067	1	24	0.207727	0.319426	tr|A0A0J5PIQ5|A0A0J5PIQ5_ASPFM	http://amigo.geneontology.org/cgi-bin/amigo/term_details?term=GO:0001067
response to external stimulus	Gene Ontology	GO:0009605	3	167	0.208451	0.320157	tr|A0A0J5PNA9|A0A0J5PNA9_ASPFM|tr|A0A0J5SQG5|A0A0J5SQG5_ASPFM|tr|A0A0J5PHI4|A0A0J5PHI4_ASPFM	http://amigo.geneontology.org/cgi-bin/amigo/term_details?term=GO:0009605
meiotic cell cycle	Gene Ontology	GO:0051321	3	168	0.210853	0.323459	tr|A0A0J5PKZ7|A0A0J5PKZ7_ASPFM|tr|A0A0J5PMP0|A0A0J5PMP0_ASPFM|tr|A0A0J5SQG5|A0A0J5SQG5_ASPFM	http://amigo.geneontology.org/cgi-bin/amigo/term_details?term=GO:0051321
reproductive process in single-celled organism	Gene Ontology	GO:0022413	2	91	0.21282	0.325282	tr|A0A0J5PMP0|A0A0J5PMP0_ASPFM|tr|A0A0J5SQG5|A0A0J5SQG5_ASPFM	http://amigo.geneontology.org/cgi-bin/amigo/term_details?term=GO:0022413
purine-containing compound metabolic process	Gene Ontology	GO:0072521	2	91	0.21282	0.325282	tr|A0A0J5PQL3|A0A0J5PQL3_ASPFM|tr|A0A0J5SQG5|A0A0J5SQG5_ASPFM	http://amigo.geneontology.org/cgi-bin/amigo/term_details?term=GO:0072521
cell differentiation	Gene Ontology	GO:0030154	3	169	0.213262	0.325282	tr|A0A0J5PKZ7|A0A0J5PKZ7_ASPFM|tr|A0A0J5PMP0|A0A0J5PMP0_ASPFM|tr|A0A0J5SQG5|A0A0J5SQG5_ASPFM	http://amigo.geneontology.org/cgi-bin/amigo/term_details?term=GO:0030154
nucleolar part	Gene Ontology	GO:0044452	1	25	0.215081	0.325282	tr|A0A0J5PNE9|A0A0J5PNE9_ASPFM	http://amigo.geneontology.org/cgi-bin/amigo/term_details?term=GO:0044452
maintenance of location	Gene Ontology	GO:0051235	1	25	0.215081	0.325282	tr|A0A0J5PMP0|A0A0J5PMP0_ASPFM	http://amigo.geneontology.org/cgi-bin/amigo/term_details?term=GO:0051235
intraspecies interaction between organisms	Gene Ontology	GO:0051703	1	25	0.215081	0.325282	tr|A0A0J5SQG5|A0A0J5SQG5_ASPFM	http://amigo.geneontology.org/cgi-bin/amigo/term_details?term=GO:0051703
response to other organism	Gene Ontology	GO:0051707	1	25	0.215081	0.325282	tr|A0A0J5SQG5|A0A0J5SQG5_ASPFM	http://amigo.geneontology.org/cgi-bin/amigo/term_details?term=GO:0051707
response to external biotic stimulus	Gene Ontology	GO:0043207	1	25	0.215081	0.325282	tr|A0A0J5SQG5|A0A0J5SQG5_ASPFM	http://amigo.geneontology.org/cgi-bin/amigo/term_details?term=GO:0043207
nuclear-transcribed mRNA catabolic process	Gene Ontology	GO:0000956	1	25	0.215081	0.325282	tr|A0A0J5SKW5|A0A0J5SKW5_ASPFM	http://amigo.geneontology.org/cgi-bin/amigo/term_details?term=GO:0000956
macromolecular complex disassembly	Gene Ontology	GO:0032984	1	25	0.215081	0.325282	tr|A0A0J5PIQ5|A0A0J5PIQ5_ASPFM	http://amigo.geneontology.org/cgi-bin/amigo/term_details?term=GO:0032984
oxidoreductase activity, acting on NAD(P)H	Gene Ontology	GO:0016651	1	25	0.215081	0.325282	tr|A0A0J5PEJ8|A0A0J5PEJ8_ASPFM	http://amigo.geneontology.org/cgi-bin/amigo/term_details?term=GO:0016651
single-species biofilm formation on inanimate substrate	Gene Ontology	GO:0044011	1	25	0.215081	0.325282	tr|A0A0J5SQG5|A0A0J5SQG5_ASPFM	http://amigo.geneontology.org/cgi-bin/amigo/term_details?term=GO:0044011
cellular catabolic process	Gene Ontology	GO:0044248	5	342	0.218405	0.329701	tr|A0A0J5PUB3|A0A0J5PUB3_ASPFM|tr|A0A0J5Q2W2|A0A0J5Q2W2_ASPFM|tr|A0A0J5PVE5|A0A0J5PVE5_ASPFM|tr|A0A0J5PDH8|A0A0J5PDH8_ASPFM|tr|A0A0J5SKW5|A0A0J5SKW5_ASPFM	http://amigo.geneontology.org/cgi-bin/amigo/term_details?term=GO:0044248
multi-organism cellular process	Gene Ontology	GO:0044764	2	93	0.219628	0.329701	tr|A0A0J5PMP0|A0A0J5PMP0_ASPFM|tr|A0A0J5SQG5|A0A0J5SQG5_ASPFM	http://amigo.geneontology.org/cgi-bin/amigo/term_details?term=GO:0044764
transcription from RNA polymerase II promoter	Gene Ontology	GO:0006366	3	172	0.220524	0.329701	tr|A0A0J5PMP0|A0A0J5PMP0_ASPFM|tr|A0A0J5SQG5|A0A0J5SQG5_ASPFM|tr|A0A0J5PIQ5|A0A0J5PIQ5_ASPFM	http://amigo.geneontology.org/cgi-bin/amigo/term_details?term=GO:0006366
ergosterol biosynthetic process	Gene Ontology	GO:0006696	1	26	0.222369	0.329701	tr|A0A0J5PUK7|A0A0J5PUK7_ASPFM	http://amigo.geneontology.org/cgi-bin/amigo/term_details?term=GO:0006696
regulation of cell division	Gene Ontology	GO:0051302	1	26	0.222369	0.329701	tr|A0A0J5PMP0|A0A0J5PMP0_ASPFM	http://amigo.geneontology.org/cgi-bin/amigo/term_details?term=GO:0051302
cellular lipid biosynthetic process	Gene Ontology	GO:0097384	1	26	0.222369	0.329701	tr|A0A0J5PUK7|A0A0J5PUK7_ASPFM	http://amigo.geneontology.org/cgi-bin/amigo/term_details?term=GO:0097384
organelle inheritance	Gene Ontology	GO:0048308	1	26	0.222369	0.329701	tr|A0A0J5Q0U9|A0A0J5Q0U9_ASPFM	http://amigo.geneontology.org/cgi-bin/amigo/term_details?term=GO:0048308
negative regulation of molecular function	Gene Ontology	GO:0044092	1	26	0.222369	0.329701	tr|A0A0J5PMP0|A0A0J5PMP0_ASPFM	http://amigo.geneontology.org/cgi-bin/amigo/term_details?term=GO:0044092
purine ribonucleoside biosynthetic process	Gene Ontology	GO:0046129	1	26	0.222369	0.329701	tr|A0A0J5PQL3|A0A0J5PQL3_ASPFM	http://amigo.geneontology.org/cgi-bin/amigo/term_details?term=GO:0046129
purine nucleoside biosynthetic process	Gene Ontology	GO:0042451	1	26	0.222369	0.329701	tr|A0A0J5PQL3|A0A0J5PQL3_ASPFM	http://amigo.geneontology.org/cgi-bin/amigo/term_details?term=GO:0042451
nucleoside-triphosphatase regulator activity	Gene Ontology	GO:0060589	1	26	0.222369	0.329701	tr|A0A0J5PVS4|A0A0J5PVS4_ASPFM	http://amigo.geneontology.org/cgi-bin/amigo/term_details?term=GO:0060589
phytosteroid biosynthetic process	Gene Ontology	GO:0016129	1	26	0.222369	0.329701	tr|A0A0J5PUK7|A0A0J5PUK7_ASPFM	http://amigo.geneontology.org/cgi-bin/amigo/term_details?term=GO:0016129
nucleus organization	Gene Ontology	GO:0006997	1	26	0.222369	0.329701	tr|A0A0J5PKZ7|A0A0J5PKZ7_ASPFM	http://amigo.geneontology.org/cgi-bin/amigo/term_details?term=GO:0006997
cellular alcohol biosynthetic process	Gene Ontology	GO:0044108	1	26	0.222369	0.329701	tr|A0A0J5PUK7|A0A0J5PUK7_ASPFM	http://amigo.geneontology.org/cgi-bin/amigo/term_details?term=GO:0044108
DNA integrity checkpoint	Gene Ontology	GO:0031570	1	26	0.222369	0.329701	tr|A0A0J5PMP0|A0A0J5PMP0_ASPFM	http://amigo.geneontology.org/cgi-bin/amigo/term_details?term=GO:0031570
ion transport	Gene Ontology	GO:0006811	3	173	0.222956	0.330191	tr|A0A0J5PN06|A0A0J5PN06_ASPFM|tr|A0A0J5Q4T5|A0A0J5Q4T5_ASPFM|tr|A0A0J5PQL3|A0A0J5PQL3_ASPFM	http://amigo.geneontology.org/cgi-bin/amigo/term_details?term=GO:0006811
phytosteroid metabolic process	Gene Ontology	GO:0016128	1	27	0.229589	0.335789	tr|A0A0J5PUK7|A0A0J5PUK7_ASPFM	http://amigo.geneontology.org/cgi-bin/amigo/term_details?term=GO:0016128
cell-substrate adhesion	Gene Ontology	GO:0031589	1	27	0.229589	0.335789	tr|A0A0J5SQG5|A0A0J5SQG5_ASPFM	http://amigo.geneontology.org/cgi-bin/amigo/term_details?term=GO:0031589
single-species submerged biofilm formation	Gene Ontology	GO:0090609	1	27	0.229589	0.335789	tr|A0A0J5SQG5|A0A0J5SQG5_ASPFM	http://amigo.geneontology.org/cgi-bin/amigo/term_details?term=GO:0090609
pyrimidine-containing compound metabolic process	Gene Ontology	GO:0072527	1	27	0.229589	0.335789	tr|A0A0J5PRM9|A0A0J5PRM9_ASPFM	http://amigo.geneontology.org/cgi-bin/amigo/term_details?term=GO:0072527
mRNA catabolic process	Gene Ontology	GO:0006402	1	27	0.229589	0.335789	tr|A0A0J5SKW5|A0A0J5SKW5_ASPFM	http://amigo.geneontology.org/cgi-bin/amigo/term_details?term=GO:0006402
regulation of cellular localization	Gene Ontology	GO:0060341	1	27	0.229589	0.335789	tr|A0A0J5SQG5|A0A0J5SQG5_ASPFM	http://amigo.geneontology.org/cgi-bin/amigo/term_details?term=GO:0060341
single-organism membrane fusion	Gene Ontology	GO:0044801	1	27	0.229589	0.335789	tr|A0A0J5PRS9|A0A0J5PRS9_ASPFM	http://amigo.geneontology.org/cgi-bin/amigo/term_details?term=GO:0044801
ergosterol metabolic process	Gene Ontology	GO:0008204	1	27	0.229589	0.335789	tr|A0A0J5PUK7|A0A0J5PUK7_ASPFM	http://amigo.geneontology.org/cgi-bin/amigo/term_details?term=GO:0008204
spindle pole body	Gene Ontology	GO:0005816	2	96	0.229875	0.335789	tr|A0A0J5PKZ7|A0A0J5PKZ7_ASPFM|tr|A0A0J5PMP0|A0A0J5PMP0_ASPFM	http://amigo.geneontology.org/cgi-bin/amigo/term_details?term=GO:0005816
spindle pole	Gene Ontology	GO:0000922	2	96	0.229875	0.335789	tr|A0A0J5PKZ7|A0A0J5PKZ7_ASPFM|tr|A0A0J5PMP0|A0A0J5PMP0_ASPFM	http://amigo.geneontology.org/cgi-bin/amigo/term_details?term=GO:0000922
establishment or maintenance of cell polarity	Gene Ontology	GO:0007163	2	96	0.229875	0.335789	tr|A0A0J5Q2W2|A0A0J5Q2W2_ASPFM|tr|A0A0J5SQG5|A0A0J5SQG5_ASPFM	http://amigo.geneontology.org/cgi-bin/amigo/term_details?term=GO:0007163
microtubule organizing center	Gene Ontology	GO:0005815	2	96	0.229875	0.335789	tr|A0A0J5PKZ7|A0A0J5PKZ7_ASPFM|tr|A0A0J5PMP0|A0A0J5PMP0_ASPFM	http://amigo.geneontology.org/cgi-bin/amigo/term_details?term=GO:0005815
cellular biosynthetic process	Gene Ontology	GO:0044249	15	1301	0.231266	0.337226	tr|A0A0J5PRM9|A0A0J5PRM9_ASPFM|tr|A0A0J5Q1H9|A0A0J5Q1H9_ASPFM|tr|A0A0J5Q6L6|A0A0J5Q6L6_ASPFM|tr|A0A0J5PNA9|A0A0J5PNA9_ASPFM|tr|A0A0J5PQL3|A0A0J5PQL3_ASPFM|tr|A0A0J5Q0I9|A0A0J5Q0I9_ASPFM|tr|A0A0J5SQG5|A0A0J5SQG5_ASPFM|tr|A0A0J5SCF2|A0A0J5SCF2_ASPFM|tr|A0A0J5PI11|A0A0J5PI11_ASPFM|tr|A0A0J5SQA8|A0A0J5SQA8_ASPFM|tr|A0A0J5PMP0|A0A0J5PMP0_ASPFM|tr|A0A0J5PUK7|A0A0J5PUK7_ASPFM|tr|A0A0J5PKY1|A0A0J5PKY1_AS…	http://amigo.geneontology.org/cgi-bin/amigo/term_details?term=GO:0044249
macromolecule modification	Gene Ontology	GO:0043412	6	440	0.231383	0.337226	tr|A0A0J5PDH8|A0A0J5PDH8_ASPFM|tr|A0A0J5PVE5|A0A0J5PVE5_ASPFM|tr|A0A0J5SQG5|A0A0J5SQG5_ASPFM|tr|A0A0J5SQA8|A0A0J5SQA8_ASPFM|tr|A0A0J5Q1L6|A0A0J5Q1L6_ASPFM|tr|A0A0J5PMP0|A0A0J5PMP0_ASPFM	http://amigo.geneontology.org/cgi-bin/amigo/term_details?term=GO:0043412
cellular chemical homeostasis	Gene Ontology	GO:0055082	2	97	0.233298	0.339631	tr|A0A0J5Q3U7|A0A0J5Q3U7_ASPFM|tr|A0A0J5SQG5|A0A0J5SQG5_ASPFM	http://amigo.geneontology.org/cgi-bin/amigo/term_details?term=GO:0055082
single organism reproductive process	Gene Ontology	GO:0044702	3	178	0.235197	0.340401	tr|A0A0J5PKZ7|A0A0J5PKZ7_ASPFM|tr|A0A0J5PMP0|A0A0J5PMP0_ASPFM|tr|A0A0J5SQG5|A0A0J5SQG5_ASPFM	http://amigo.geneontology.org/cgi-bin/amigo/term_details?term=GO:0044702
rRNA processing	Gene Ontology	GO:0006364	2	98	0.236724	0.340401	tr|A0A0J5PNE9|A0A0J5PNE9_ASPFM|tr|A0A0J5Q4L0|A0A0J5Q4L0_ASPFM	http://amigo.geneontology.org/cgi-bin/amigo/term_details?term=GO:0006364
dicarboxylic acid metabolic process	Gene Ontology	GO:0043648	1	28	0.236743	0.340401	tr|A0A0J5Q1H9|A0A0J5Q1H9_ASPFM	http://amigo.geneontology.org/cgi-bin/amigo/term_details?term=GO:0043648
regulation of Ras protein signal transduction	Gene Ontology	GO:0046578	1	28	0.236743	0.340401	tr|A0A0J5PMP0|A0A0J5PMP0_ASPFM	http://amigo.geneontology.org/cgi-bin/amigo/term_details?term=GO:0046578
negative regulation of chromosome organization	Gene Ontology	GO:2001251	1	28	0.236743	0.340401	tr|A0A0J5PMP0|A0A0J5PMP0_ASPFM	http://amigo.geneontology.org/cgi-bin/amigo/term_details?term=GO:2001251
single-species biofilm formation	Gene Ontology	GO:0044010	1	28	0.236743	0.340401	tr|A0A0J5SQG5|A0A0J5SQG5_ASPFM	http://amigo.geneontology.org/cgi-bin/amigo/term_details?term=GO:0044010
membrane fusion	Gene Ontology	GO:0061025	1	28	0.236743	0.340401	tr|A0A0J5PRS9|A0A0J5PRS9_ASPFM	http://amigo.geneontology.org/cgi-bin/amigo/term_details?term=GO:0061025
sterol biosynthetic process	Gene Ontology	GO:0016126	1	28	0.236743	0.340401	tr|A0A0J5PUK7|A0A0J5PUK7_ASPFM	http://amigo.geneontology.org/cgi-bin/amigo/term_details?term=GO:0016126
regulation of catabolic process	Gene Ontology	GO:0009894	1	28	0.236743	0.340401	tr|A0A0J5PUB3|A0A0J5PUB3_ASPFM	http://amigo.geneontology.org/cgi-bin/amigo/term_details?term=GO:0009894
glucosamine-containing compound metabolic process	Gene Ontology	GO:1901071	1	28	0.236743	0.340401	tr|A0A0J5PMP0|A0A0J5PMP0_ASPFM	http://amigo.geneontology.org/cgi-bin/amigo/term_details?term=GO:1901071
cellular alcohol metabolic process	Gene Ontology	GO:0044107	1	28	0.236743	0.340401	tr|A0A0J5PUK7|A0A0J5PUK7_ASPFM	http://amigo.geneontology.org/cgi-bin/amigo/term_details?term=GO:0044107
endoplasmic reticulum part	Gene Ontology	GO:0044432	2	99	0.240154	0.344442	tr|A0A0J5SQG5|A0A0J5SQG5_ASPFM|tr|A0A0J5PHI4|A0A0J5PHI4_ASPFM	http://amigo.geneontology.org/cgi-bin/amigo/term_details?term=GO:0044432
conidium formation	Gene Ontology	GO:0048315	2	99	0.240154	0.344442	tr|A0A0J5PKZ7|A0A0J5PKZ7_ASPFM|tr|A0A0J5SQG5|A0A0J5SQG5_ASPFM	http://amigo.geneontology.org/cgi-bin/amigo/term_details?term=GO:0048315
anatomical structure morphogenesis	Gene Ontology	GO:0009653	4	266	0.240358	0.344442	tr|A0A0J5PKZ7|A0A0J5PKZ7_ASPFM|tr|A0A0J5Q0U9|A0A0J5Q0U9_ASPFM|tr|A0A0J5SQG5|A0A0J5SQG5_ASPFM|tr|A0A0J5PMP0|A0A0J5PMP0_ASPFM	http://amigo.geneontology.org/cgi-bin/amigo/term_details?term=GO:0009653
organic substance biosynthetic process	Gene Ontology	GO:1901576	15	1314	0.243096	0.34671	tr|A0A0J5PRM9|A0A0J5PRM9_ASPFM|tr|A0A0J5Q1H9|A0A0J5Q1H9_ASPFM|tr|A0A0J5Q6L6|A0A0J5Q6L6_ASPFM|tr|A0A0J5PNA9|A0A0J5PNA9_ASPFM|tr|A0A0J5PQL3|A0A0J5PQL3_ASPFM|tr|A0A0J5Q0I9|A0A0J5Q0I9_ASPFM|tr|A0A0J5SQG5|A0A0J5SQG5_ASPFM|tr|A0A0J5SCF2|A0A0J5SCF2_ASPFM|tr|A0A0J5PI11|A0A0J5PI11_ASPFM|tr|A0A0J5SQA8|A0A0J5SQA8_ASPFM|tr|A0A0J5PMP0|A0A0J5PMP0_ASPFM|tr|A0A0J5PUK7|A0A0J5PUK7_ASPFM|tr|A0A0J5PKY1|A0A0J5PKY1_AS…	http://amigo.geneontology.org/cgi-bin/amigo/term_details?term=GO:1901576
response to oxidative stress	Gene Ontology	GO:0006979	2	100	0.243586	0.34671	tr|A0A0J5Q3U7|A0A0J5Q3U7_ASPFM|tr|A0A0J5SQG5|A0A0J5SQG5_ASPFM	http://amigo.geneontology.org/cgi-bin/amigo/term_details?term=GO:0006979
cell cycle G2/M phase transition	Gene Ontology	GO:0044839	1	29	0.243831	0.34671	tr|A0A0J5PMP0|A0A0J5PMP0_ASPFM	http://amigo.geneontology.org/cgi-bin/amigo/term_details?term=GO:0044839
G2/M transition of mitotic cell cycle	Gene Ontology	GO:0000086	1	29	0.243831	0.34671	tr|A0A0J5PMP0|A0A0J5PMP0_ASPFM	http://amigo.geneontology.org/cgi-bin/amigo/term_details?term=GO:0000086
carboxylic acid transmembrane transporter activity	Gene Ontology	GO:0046943	1	29	0.243831	0.34671	tr|A0A0J5Q4T5|A0A0J5Q4T5_ASPFM	http://amigo.geneontology.org/cgi-bin/amigo/term_details?term=GO:0046943
aminoglycan metabolic process	Gene Ontology	GO:0006022	1	29	0.243831	0.34671	tr|A0A0J5PMP0|A0A0J5PMP0_ASPFM	http://amigo.geneontology.org/cgi-bin/amigo/term_details?term=GO:0006022
substrate-specific transporter activity	Gene Ontology	GO:0022892	4	268	0.24438	0.347106	tr|A0A0J5PN06|A0A0J5PN06_ASPFM|tr|A0A0J5PH08|A0A0J5PH08_ASPFM|tr|A0A0J5Q4T5|A0A0J5Q4T5_ASPFM|tr|A0A0J5PQL3|A0A0J5PQL3_ASPFM	http://amigo.geneontology.org/cgi-bin/amigo/term_details?term=GO:0022892
organic substance metabolic process	Gene Ontology	GO:0071704	26	2433	0.249466	0.351251	tr|A0A0J5SQA8|A0A0J5SQA8_ASPFM|tr|A0A0J5Q2W2|A0A0J5Q2W2_ASPFM|tr|A0A0J5PQL3|A0A0J5PQL3_ASPFM|tr|A0A0J5PRM9|A0A0J5PRM9_ASPFM|tr|A0A0J5PWF4|A0A0J5PWF4_ASPFM|tr|A0A0J5PUK7|A0A0J5PUK7_ASPFM|tr|A0A0J5PVE5|A0A0J5PVE5_ASPFM|tr|A0A0J5PNA9|A0A0J5PNA9_ASPFM|tr|A0A0J5Q4L0|A0A0J5Q4L0_ASPFM|tr|A0A0J5PRC9|A0A0J5PRC9_ASPFM|tr|A0A0J5PDH8|A0A0J5PDH8_ASPFM|tr|A0A0J5PKY1|A0A0J5PKY1_ASPFM|tr|A0A0J5SQG5|A0A0J5SQG5_AS…	http://amigo.geneontology.org/cgi-bin/amigo/term_details?term=GO:0071704
intracellular non-membrane-bounded organelle	Gene Ontology	GO:0043232	8	640	0.250433	0.351251	tr|A0A0J5SKW5|A0A0J5SKW5_ASPFM|tr|A0A0J5PKY1|A0A0J5PKY1_ASPFM|tr|A0A0J5PKZ7|A0A0J5PKZ7_ASPFM|tr|A0A0J5Q0I9|A0A0J5Q0I9_ASPFM|tr|A0A0J5PNA9|A0A0J5PNA9_ASPFM|tr|A0A0J5Q4L0|A0A0J5Q4L0_ASPFM|tr|A0A0J5PNE9|A0A0J5PNE9_ASPFM|tr|A0A0J5PMP0|A0A0J5PMP0_ASPFM	http://amigo.geneontology.org/cgi-bin/amigo/term_details?term=GO:0043232
non-membrane-bounded organelle	Gene Ontology	GO:0043228	8	640	0.250433	0.351251	tr|A0A0J5SKW5|A0A0J5SKW5_ASPFM|tr|A0A0J5PKY1|A0A0J5PKY1_ASPFM|tr|A0A0J5PKZ7|A0A0J5PKZ7_ASPFM|tr|A0A0J5Q0I9|A0A0J5Q0I9_ASPFM|tr|A0A0J5PNA9|A0A0J5PNA9_ASPFM|tr|A0A0J5Q4L0|A0A0J5Q4L0_ASPFM|tr|A0A0J5PNE9|A0A0J5PNE9_ASPFM|tr|A0A0J5PMP0|A0A0J5PMP0_ASPFM	http://amigo.geneontology.org/cgi-bin/amigo/term_details?term=GO:0043228
cell wall macromolecule biosynthetic process	Gene Ontology	GO:0044038	1	30	0.250855	0.351251	tr|A0A0J5PMP0|A0A0J5PMP0_ASPFM	http://amigo.geneontology.org/cgi-bin/amigo/term_details?term=GO:0044038
negative regulation of mitotic cell cycle phase transition	Gene Ontology	GO:1901991	1	30	0.250855	0.351251	tr|A0A0J5PMP0|A0A0J5PMP0_ASPFM	http://amigo.geneontology.org/cgi-bin/amigo/term_details?term=GO:1901991
submerged biofilm formation	Gene Ontology	GO:0090605	1	30	0.250855	0.351251	tr|A0A0J5SQG5|A0A0J5SQG5_ASPFM	http://amigo.geneontology.org/cgi-bin/amigo/term_details?term=GO:0090605
carboxylic acid transport	Gene Ontology	GO:0046942	1	30	0.250855	0.351251	tr|A0A0J5PN06|A0A0J5PN06_ASPFM	http://amigo.geneontology.org/cgi-bin/amigo/term_details?term=GO:0046942
regulation of cell shape	Gene Ontology	GO:0008360	1	30	0.250855	0.351251	tr|A0A0J5SQG5|A0A0J5SQG5_ASPFM	http://amigo.geneontology.org/cgi-bin/amigo/term_details?term=GO:0008360
organic acid transmembrane transporter activity	Gene Ontology	GO:0005342	1	30	0.250855	0.351251	tr|A0A0J5Q4T5|A0A0J5Q4T5_ASPFM	http://amigo.geneontology.org/cgi-bin/amigo/term_details?term=GO:0005342
negative regulation of cell cycle phase transition	Gene Ontology	GO:1901988	1	30	0.250855	0.351251	tr|A0A0J5PMP0|A0A0J5PMP0_ASPFM	http://amigo.geneontology.org/cgi-bin/amigo/term_details?term=GO:1901988
aromatic amino acid family metabolic process	Gene Ontology	GO:0009072	1	30	0.250855	0.351251	tr|A0A0J5Q1H9|A0A0J5Q1H9_ASPFM	http://amigo.geneontology.org/cgi-bin/amigo/term_details?term=GO:0009072
regulation of protein localization	Gene Ontology	GO:0032880	1	30	0.250855	0.351251	tr|A0A0J5SQG5|A0A0J5SQG5_ASPFM	http://amigo.geneontology.org/cgi-bin/amigo/term_details?term=GO:0032880
cellular component macromolecule biosynthetic process	Gene Ontology	GO:0070589	1	30	0.250855	0.351251	tr|A0A0J5PMP0|A0A0J5PMP0_ASPFM	http://amigo.geneontology.org/cgi-bin/amigo/term_details?term=GO:0070589
nitrogen compound metabolic process	Gene Ontology	GO:0006807	17	1523	0.251903	0.352335	tr|A0A0J5PRM9|A0A0J5PRM9_ASPFM|tr|A0A0J5PWF4|A0A0J5PWF4_ASPFM|tr|A0A0J5SKW5|A0A0J5SKW5_ASPFM|tr|A0A0J5Q1H9|A0A0J5Q1H9_ASPFM|tr|A0A0J5PKY1|A0A0J5PKY1_ASPFM|tr|A0A0J5PNA9|A0A0J5PNA9_ASPFM|tr|A0A0J5PQL3|A0A0J5PQL3_ASPFM|tr|A0A0J5Q0I9|A0A0J5Q0I9_ASPFM|tr|A0A0J5SQG5|A0A0J5SQG5_ASPFM|tr|A0A0J5PNE9|A0A0J5PNE9_ASPFM|tr|A0A0J5SCF2|A0A0J5SCF2_ASPFM|tr|A0A0J5PI11|A0A0J5PI11_ASPFM|tr|A0A0J5PRC9|A0A0J5PRC9_AS…	http://amigo.geneontology.org/cgi-bin/amigo/term_details?term=GO:0006807
rRNA metabolic process	Gene Ontology	GO:0016072	2	103	0.253895	0.354735	tr|A0A0J5PNE9|A0A0J5PNE9_ASPFM|tr|A0A0J5Q4L0|A0A0J5Q4L0_ASPFM	http://amigo.geneontology.org/cgi-bin/amigo/term_details?term=GO:0016072
cellular nitrogen compound metabolic process	Gene Ontology	GO:0034641	15	1326	0.254238	0.354828	tr|A0A0J5PRM9|A0A0J5PRM9_ASPFM|tr|A0A0J5PWF4|A0A0J5PWF4_ASPFM|tr|A0A0J5SKW5|A0A0J5SKW5_ASPFM|tr|A0A0J5Q4L0|A0A0J5Q4L0_ASPFM|tr|A0A0J5PKY1|A0A0J5PKY1_ASPFM|tr|A0A0J5PNA9|A0A0J5PNA9_ASPFM|tr|A0A0J5PQL3|A0A0J5PQL3_ASPFM|tr|A0A0J5Q0I9|A0A0J5Q0I9_ASPFM|tr|A0A0J5SQG5|A0A0J5SQG5_ASPFM|tr|A0A0J5PNE9|A0A0J5PNE9_ASPFM|tr|A0A0J5PR80|A0A0J5PR80_ASPFM|tr|A0A0J5PI11|A0A0J5PI11_ASPFM|tr|A0A0J5PRC9|A0A0J5PRC9_AS…	http://amigo.geneontology.org/cgi-bin/amigo/term_details?term=GO:0034641
small nuclear ribonucleoprotein complex	Gene Ontology	GO:0030532	1	31	0.257813	0.355949	tr|A0A0J5PNE9|A0A0J5PNE9_ASPFM	http://amigo.geneontology.org/cgi-bin/amigo/term_details?term=GO:0030532
spliceosomal snRNP complex	Gene Ontology	GO:0097525	1	31	0.257813	0.355949	tr|A0A0J5PNE9|A0A0J5PNE9_ASPFM	http://amigo.geneontology.org/cgi-bin/amigo/term_details?term=GO:0097525
coated vesicle	Gene Ontology	GO:0030135	1	31	0.257813	0.355949	tr|A0A0J5PZF9|A0A0J5PZF9_ASPFM	http://amigo.geneontology.org/cgi-bin/amigo/term_details?term=GO:0030135
organelle subcompartment	Gene Ontology	GO:0031984	1	31	0.257813	0.355949	tr|A0A0J5PV51|A0A0J5PV51_ASPFM	http://amigo.geneontology.org/cgi-bin/amigo/term_details?term=GO:0031984
interaction with host	Gene Ontology	GO:0051701	1	31	0.257813	0.355949	tr|A0A0J5SQG5|A0A0J5SQG5_ASPFM	http://amigo.geneontology.org/cgi-bin/amigo/term_details?term=GO:0051701
purine ribonucleoside monophosphate biosynthetic process	Gene Ontology	GO:0009168	1	31	0.257813	0.355949	tr|A0A0J5PQL3|A0A0J5PQL3_ASPFM	http://amigo.geneontology.org/cgi-bin/amigo/term_details?term=GO:0009168
glutamine family amino acid metabolic process	Gene Ontology	GO:0009064	1	31	0.257813	0.355949	tr|A0A0J5SCF2|A0A0J5SCF2_ASPFM	http://amigo.geneontology.org/cgi-bin/amigo/term_details?term=GO:0009064
peroxisome organization	Gene Ontology	GO:0007031	1	31	0.257813	0.355949	tr|A0A0J5Q1B9|A0A0J5Q1B9_ASPFM	http://amigo.geneontology.org/cgi-bin/amigo/term_details?term=GO:0007031
purine nucleoside monophosphate biosynthetic process	Gene Ontology	GO:0009127	1	31	0.257813	0.355949	tr|A0A0J5PQL3|A0A0J5PQL3_ASPFM	http://amigo.geneontology.org/cgi-bin/amigo/term_details?term=GO:0009127
cell septum assembly	Gene Ontology	GO:0090529	1	31	0.257813	0.355949	tr|A0A0J5PMP0|A0A0J5PMP0_ASPFM	http://amigo.geneontology.org/cgi-bin/amigo/term_details?term=GO:0090529
chemical homeostasis	Gene Ontology	GO:0048878	2	105	0.260775	0.359265	tr|A0A0J5Q3U7|A0A0J5Q3U7_ASPFM|tr|A0A0J5SQG5|A0A0J5SQG5_ASPFM	http://amigo.geneontology.org/cgi-bin/amigo/term_details?term=GO:0048878
reproduction of a single-celled organism	Gene Ontology	GO:0032505	2	105	0.260775	0.359265	tr|A0A0J5PMP0|A0A0J5PMP0_ASPFM|tr|A0A0J5SQG5|A0A0J5SQG5_ASPFM	http://amigo.geneontology.org/cgi-bin/amigo/term_details?term=GO:0032505
alpha-amino acid metabolic process	Gene Ontology	GO:1901605	2	106	0.264216	0.360048	tr|A0A0J5SCF2|A0A0J5SCF2_ASPFM|tr|A0A0J5Q1H9|A0A0J5Q1H9_ASPFM	http://amigo.geneontology.org/cgi-bin/amigo/term_details?term=GO:1901605
protein localization to nucleus	Gene Ontology	GO:0034504	1	32	0.264708	0.360048	tr|A0A0J5SQG5|A0A0J5SQG5_ASPFM	http://amigo.geneontology.org/cgi-bin/amigo/term_details?term=GO:0034504
ribonucleoside biosynthetic process	Gene Ontology	GO:0042455	1	32	0.264708	0.360048	tr|A0A0J5PQL3|A0A0J5PQL3_ASPFM	http://amigo.geneontology.org/cgi-bin/amigo/term_details?term=GO:0042455
mRNA splicing, via spliceosome	Gene Ontology	GO:0000398	1	32	0.264708	0.360048	tr|A0A0J5PNE9|A0A0J5PNE9_ASPFM	http://amigo.geneontology.org/cgi-bin/amigo/term_details?term=GO:0000398
positive regulation of phosphate metabolic process	Gene Ontology	GO:0045937	1	32	0.264708	0.360048	tr|A0A0J5SQG5|A0A0J5SQG5_ASPFM	http://amigo.geneontology.org/cgi-bin/amigo/term_details?term=GO:0045937
cell adhesion	Gene Ontology	GO:0007155	1	32	0.264708	0.360048	tr|A0A0J5SQG5|A0A0J5SQG5_ASPFM	http://amigo.geneontology.org/cgi-bin/amigo/term_details?term=GO:0007155
translation factor activity, RNA binding	Gene Ontology	GO:0008135	1	32	0.264708	0.360048	tr|A0A0J5PIQ5|A0A0J5PIQ5_ASPFM	http://amigo.geneontology.org/cgi-bin/amigo/term_details?term=GO:0008135
steroid biosynthetic process	Gene Ontology	GO:0006694	1	32	0.264708	0.360048	tr|A0A0J5PUK7|A0A0J5PUK7_ASPFM	http://amigo.geneontology.org/cgi-bin/amigo/term_details?term=GO:0006694
positive regulation of phosphorus metabolic process	Gene Ontology	GO:0010562	1	32	0.264708	0.360048	tr|A0A0J5SQG5|A0A0J5SQG5_ASPFM	http://amigo.geneontology.org/cgi-bin/amigo/term_details?term=GO:0010562
organic anion transport	Gene Ontology	GO:0015711	1	32	0.264708	0.360048	tr|A0A0J5PN06|A0A0J5PN06_ASPFM	http://amigo.geneontology.org/cgi-bin/amigo/term_details?term=GO:0015711
nucleoside biosynthetic process	Gene Ontology	GO:0009163	1	32	0.264708	0.360048	tr|A0A0J5PQL3|A0A0J5PQL3_ASPFM	http://amigo.geneontology.org/cgi-bin/amigo/term_details?term=GO:0009163
mating projection tip	Gene Ontology	GO:0043332	1	32	0.264708	0.360048	tr|A0A0J5PHI4|A0A0J5PHI4_ASPFM	http://amigo.geneontology.org/cgi-bin/amigo/term_details?term=GO:0043332
heterocyclic compound binding	Gene Ontology	GO:1901363	15	1341	0.26845	0.364752	tr|A0A0J5PRS9|A0A0J5PRS9_ASPFM|tr|A0A0J5PV51|A0A0J5PV51_ASPFM|tr|A0A0J5SKW5|A0A0J5SKW5_ASPFM|tr|A0A0J5STT4|A0A0J5STT4_ASPFM|tr|A0A0J5PKY1|A0A0J5PKY1_ASPFM|tr|A0A0J5PNA9|A0A0J5PNA9_ASPFM|tr|A0A0J5Q0I9|A0A0J5Q0I9_ASPFM|tr|A0A0J5SQG5|A0A0J5SQG5_ASPFM|tr|A0A0J5PNE9|A0A0J5PNE9_ASPFM|tr|A0A0J5PR80|A0A0J5PR80_ASPFM|tr|A0A0J5Q4L0|A0A0J5Q4L0_ASPFM|tr|A0A0J5PTV6|A0A0J5PTV6_ASPFM|tr|A0A0J5PMP0|A0A0J5PMP0_AS…	http://amigo.geneontology.org/cgi-bin/amigo/term_details?term=GO:1901363
organic cyclic compound binding	Gene Ontology	GO:0097159	15	1344	0.271329	0.366621	tr|A0A0J5PRS9|A0A0J5PRS9_ASPFM|tr|A0A0J5PV51|A0A0J5PV51_ASPFM|tr|A0A0J5SKW5|A0A0J5SKW5_ASPFM|tr|A0A0J5STT4|A0A0J5STT4_ASPFM|tr|A0A0J5PKY1|A0A0J5PKY1_ASPFM|tr|A0A0J5PNA9|A0A0J5PNA9_ASPFM|tr|A0A0J5Q0I9|A0A0J5Q0I9_ASPFM|tr|A0A0J5SQG5|A0A0J5SQG5_ASPFM|tr|A0A0J5PNE9|A0A0J5PNE9_ASPFM|tr|A0A0J5PR80|A0A0J5PR80_ASPFM|tr|A0A0J5Q4L0|A0A0J5Q4L0_ASPFM|tr|A0A0J5PTV6|A0A0J5PTV6_ASPFM|tr|A0A0J5PMP0|A0A0J5PMP0_AS…	http://amigo.geneontology.org/cgi-bin/amigo/term_details?term=GO:0097159
organelle fusion	Gene Ontology	GO:0048284	1	33	0.27154	0.366621	tr|A0A0J5PRS9|A0A0J5PRS9_ASPFM	http://amigo.geneontology.org/cgi-bin/amigo/term_details?term=GO:0048284
amino sugar metabolic process	Gene Ontology	GO:0006040	1	33	0.27154	0.366621	tr|A0A0J5PMP0|A0A0J5PMP0_ASPFM	http://amigo.geneontology.org/cgi-bin/amigo/term_details?term=GO:0006040
RNA splicing, via transesterification reactions with bulged adenosine as nucleophile	Gene Ontology	GO:0000377	1	33	0.27154	0.366621	tr|A0A0J5PNE9|A0A0J5PNE9_ASPFM	http://amigo.geneontology.org/cgi-bin/amigo/term_details?term=GO:0000377
negative regulation of multi-organism process	Gene Ontology	GO:0043901	1	33	0.27154	0.366621	tr|A0A0J5PMP0|A0A0J5PMP0_ASPFM	http://amigo.geneontology.org/cgi-bin/amigo/term_details?term=GO:0043901
regulation of small GTPase mediated signal transduction	Gene Ontology	GO:0051056	1	34	0.278308	0.373404	tr|A0A0J5PMP0|A0A0J5PMP0_ASPFM	http://amigo.geneontology.org/cgi-bin/amigo/term_details?term=GO:0051056
glycosyl compound biosynthetic process	Gene Ontology	GO:1901659	1	34	0.278308	0.373404	tr|A0A0J5PQL3|A0A0J5PQL3_ASPFM	http://amigo.geneontology.org/cgi-bin/amigo/term_details?term=GO:1901659
enzyme binding	Gene Ontology	GO:0019899	1	34	0.278308	0.373404	tr|A0A0J5PH08|A0A0J5PH08_ASPFM	http://amigo.geneontology.org/cgi-bin/amigo/term_details?term=GO:0019899
ribosome assembly	Gene Ontology	GO:0042255	1	34	0.278308	0.373404	tr|A0A0J5PKY1|A0A0J5PKY1_ASPFM	http://amigo.geneontology.org/cgi-bin/amigo/term_details?term=GO:0042255
ribonucleoside monophosphate biosynthetic process	Gene Ontology	GO:0009156	1	34	0.278308	0.373404	tr|A0A0J5PQL3|A0A0J5PQL3_ASPFM	http://amigo.geneontology.org/cgi-bin/amigo/term_details?term=GO:0009156
double-strand break repair	Gene Ontology	GO:0006302	1	34	0.278308	0.373404	tr|A0A0J5PR80|A0A0J5PR80_ASPFM	http://amigo.geneontology.org/cgi-bin/amigo/term_details?term=GO:0006302
response to stress	Gene Ontology	GO:0006950	6	473	0.283053	0.379374	tr|A0A0J5PHI4|A0A0J5PHI4_ASPFM|tr|A0A0J5PNA9|A0A0J5PNA9_ASPFM|tr|A0A0J5SQG5|A0A0J5SQG5_ASPFM|tr|A0A0J5PR80|A0A0J5PR80_ASPFM|tr|A0A0J5PMP0|A0A0J5PMP0_ASPFM|tr|A0A0J5Q3U7|A0A0J5Q3U7_ASPFM	http://amigo.geneontology.org/cgi-bin/amigo/term_details?term=GO:0006950
small ribosomal subunit	Gene Ontology	GO:0015935	1	35	0.285015	0.38002	tr|A0A0J5Q4L0|A0A0J5Q4L0_ASPFM	http://amigo.geneontology.org/cgi-bin/amigo/term_details?term=GO:0015935
cell projection part	Gene Ontology	GO:0044463	1	35	0.285015	0.38002	tr|A0A0J5PHI4|A0A0J5PHI4_ASPFM	http://amigo.geneontology.org/cgi-bin/amigo/term_details?term=GO:0044463
RNA splicing, via transesterification reactions	Gene Ontology	GO:0000375	1	35	0.285015	0.38002	tr|A0A0J5PNE9|A0A0J5PNE9_ASPFM	http://amigo.geneontology.org/cgi-bin/amigo/term_details?term=GO:0000375
regulation of cell morphogenesis	Gene Ontology	GO:0022604	1	35	0.285015	0.38002	tr|A0A0J5SQG5|A0A0J5SQG5_ASPFM	http://amigo.geneontology.org/cgi-bin/amigo/term_details?term=GO:0022604
biofilm formation	Gene Ontology	GO:0042710	1	35	0.285015	0.38002	tr|A0A0J5SQG5|A0A0J5SQG5_ASPFM	http://amigo.geneontology.org/cgi-bin/amigo/term_details?term=GO:0042710
small molecule metabolic process	Gene Ontology	GO:0044281	8	667	0.286548	0.381668	tr|A0A0J5PWF4|A0A0J5PWF4_ASPFM|tr|A0A0J5SQA8|A0A0J5SQA8_ASPFM|tr|A0A0J5PUK7|A0A0J5PUK7_ASPFM|tr|A0A0J5PQL3|A0A0J5PQL3_ASPFM|tr|A0A0J5SQG5|A0A0J5SQG5_ASPFM|tr|A0A0J5SCF2|A0A0J5SCF2_ASPFM|tr|A0A0J5Q1H9|A0A0J5Q1H9_ASPFM|tr|A0A0J5PRC9|A0A0J5PRC9_ASPFM	http://amigo.geneontology.org/cgi-bin/amigo/term_details?term=GO:0044281
positive regulation of cellular biosynthetic process	Gene Ontology	GO:0031328	2	113	0.288296	0.383009	tr|A0A0J5SQG5|A0A0J5SQG5_ASPFM|tr|A0A0J5PIQ5|A0A0J5PIQ5_ASPFM	http://amigo.geneontology.org/cgi-bin/amigo/term_details?term=GO:0031328
response to chemical	Gene Ontology	GO:0042221	5	383	0.290108	0.383009	tr|A0A0J5PRS9|A0A0J5PRS9_ASPFM|tr|A0A0J5Q3U7|A0A0J5Q3U7_ASPFM|tr|A0A0J5SQG5|A0A0J5SQG5_ASPFM|tr|A0A0J5PV51|A0A0J5PV51_ASPFM|tr|A0A0J5PRM9|A0A0J5PRM9_ASPFM	http://amigo.geneontology.org/cgi-bin/amigo/term_details?term=GO:0042221
establishment of cell polarity	Gene Ontology	GO:0030010	1	36	0.29166	0.383009	tr|A0A0J5Q2W2|A0A0J5Q2W2_ASPFM	http://amigo.geneontology.org/cgi-bin/amigo/term_details?term=GO:0030010
mating projection	Gene Ontology	GO:0005937	1	36	0.29166	0.383009	tr|A0A0J5PHI4|A0A0J5PHI4_ASPFM	http://amigo.geneontology.org/cgi-bin/amigo/term_details?term=GO:0005937
mitotic cell cycle checkpoint	Gene Ontology	GO:0007093	1	36	0.29166	0.383009	tr|A0A0J5PMP0|A0A0J5PMP0_ASPFM	http://amigo.geneontology.org/cgi-bin/amigo/term_details?term=GO:0007093
cell projection	Gene Ontology	GO:0042995	1	36	0.29166	0.383009	tr|A0A0J5PHI4|A0A0J5PHI4_ASPFM	http://amigo.geneontology.org/cgi-bin/amigo/term_details?term=GO:0042995
cation-transporting ATPase activity	Gene Ontology	GO:0019829	1	36	0.29166	0.383009	tr|A0A0J5PQL3|A0A0J5PQL3_ASPFM	http://amigo.geneontology.org/cgi-bin/amigo/term_details?term=GO:0019829
ATPase coupled ion transmembrane transporter activity	Gene Ontology	GO:0042625	1	36	0.29166	0.383009	tr|A0A0J5PQL3|A0A0J5PQL3_ASPFM	http://amigo.geneontology.org/cgi-bin/amigo/term_details?term=GO:0042625
unfolded protein binding	Gene Ontology	GO:0051082	1	36	0.29166	0.383009	tr|A0A0J5PHI4|A0A0J5PHI4_ASPFM	http://amigo.geneontology.org/cgi-bin/amigo/term_details?term=GO:0051082
nucleoside monophosphate biosynthetic process	Gene Ontology	GO:0009124	1	36	0.29166	0.383009	tr|A0A0J5PQL3|A0A0J5PQL3_ASPFM	http://amigo.geneontology.org/cgi-bin/amigo/term_details?term=GO:0009124
regulation of transferase activity	Gene Ontology	GO:0051338	1	36	0.29166	0.383009	tr|A0A0J5PMP0|A0A0J5PMP0_ASPFM	http://amigo.geneontology.org/cgi-bin/amigo/term_details?term=GO:0051338
sterol metabolic process	Gene Ontology	GO:0016125	1	36	0.29166	0.383009	tr|A0A0J5PUK7|A0A0J5PUK7_ASPFM	http://amigo.geneontology.org/cgi-bin/amigo/term_details?term=GO:0016125
carboxylic acid biosynthetic process	Gene Ontology	GO:0046394	2	114	0.291732	0.383009	tr|A0A0J5SCF2|A0A0J5SCF2_ASPFM|tr|A0A0J5Q1H9|A0A0J5Q1H9_ASPFM	http://amigo.geneontology.org/cgi-bin/amigo/term_details?term=GO:0046394
macromolecule glycosylation	Gene Ontology	GO:0043413	1	37	0.298243	0.388382	tr|A0A0J5SQA8|A0A0J5SQA8_ASPFM	http://amigo.geneontology.org/cgi-bin/amigo/term_details?term=GO:0043413
cellular response to oxygen-containing compound	Gene Ontology	GO:1901701	1	37	0.298243	0.388382	tr|A0A0J5SQG5|A0A0J5SQG5_ASPFM	http://amigo.geneontology.org/cgi-bin/amigo/term_details?term=GO:1901701
spliceosomal complex	Gene Ontology	GO:0005681	1	37	0.298243	0.388382	tr|A0A0J5Q1L6|A0A0J5Q1L6_ASPFM	http://amigo.geneontology.org/cgi-bin/amigo/term_details?term=GO:0005681
double-stranded DNA binding	Gene Ontology	GO:0003690	1	37	0.298243	0.388382	tr|A0A0J5PMP0|A0A0J5PMP0_ASPFM	http://amigo.geneontology.org/cgi-bin/amigo/term_details?term=GO:0003690
regulation of translation	Gene Ontology	GO:0006417	1	37	0.298243	0.388382	tr|A0A0J5PIQ5|A0A0J5PIQ5_ASPFM	http://amigo.geneontology.org/cgi-bin/amigo/term_details?term=GO:0006417
regulation of asexual sporulation	Gene Ontology	GO:0034305	1	37	0.298243	0.388382	tr|A0A0J5SQG5|A0A0J5SQG5_ASPFM	http://amigo.geneontology.org/cgi-bin/amigo/term_details?term=GO:0034305
mitotic cytokinetic process	Gene Ontology	GO:1902410	1	37	0.298243	0.388382	tr|A0A0J5PMP0|A0A0J5PMP0_ASPFM	http://amigo.geneontology.org/cgi-bin/amigo/term_details?term=GO:1902410
protein glycosylation	Gene Ontology	GO:0006486	1	37	0.298243	0.388382	tr|A0A0J5SQA8|A0A0J5SQA8_ASPFM	http://amigo.geneontology.org/cgi-bin/amigo/term_details?term=GO:0006486
positive regulation of biosynthetic process	Gene Ontology	GO:0009891	2	116	0.298597	0.388449	tr|A0A0J5SQG5|A0A0J5SQG5_ASPFM|tr|A0A0J5PIQ5|A0A0J5PIQ5_ASPFM	http://amigo.geneontology.org/cgi-bin/amigo/term_details?term=GO:0009891
coenzyme metabolic process	Gene Ontology	GO:0006732	2	117	0.302026	0.392512	tr|A0A0J5PRC9|A0A0J5PRC9_ASPFM|tr|A0A0J5PWF4|A0A0J5PWF4_ASPFM	http://amigo.geneontology.org/cgi-bin/amigo/term_details?term=GO:0006732
secondary alcohol biosynthetic process	Gene Ontology	GO:1902653	1	38	0.304767	0.394874	tr|A0A0J5PUK7|A0A0J5PUK7_ASPFM	http://amigo.geneontology.org/cgi-bin/amigo/term_details?term=GO:1902653
biological adhesion	Gene Ontology	GO:0022610	1	38	0.304767	0.394874	tr|A0A0J5SQG5|A0A0J5SQG5_ASPFM	http://amigo.geneontology.org/cgi-bin/amigo/term_details?term=GO:0022610
positive regulation of cellular component biogenesis	Gene Ontology	GO:0044089	1	38	0.304767	0.394874	tr|A0A0J5PMP0|A0A0J5PMP0_ASPFM	http://amigo.geneontology.org/cgi-bin/amigo/term_details?term=GO:0044089
single-organism biosynthetic process	Gene Ontology	GO:0044711	7	584	0.306472	0.396284	tr|A0A0J5PUK7|A0A0J5PUK7_ASPFM|tr|A0A0J5Q6L6|A0A0J5Q6L6_ASPFM|tr|A0A0J5PQL3|A0A0J5PQL3_ASPFM|tr|A0A0J5SQG5|A0A0J5SQG5_ASPFM|tr|A0A0J5SCF2|A0A0J5SCF2_ASPFM|tr|A0A0J5Q1H9|A0A0J5Q1H9_ASPFM|tr|A0A0J5PMP0|A0A0J5PMP0_ASPFM	http://amigo.geneontology.org/cgi-bin/amigo/term_details?term=GO:0044711
biosynthetic process	Gene Ontology	GO:0009058	15	1382	0.308735	0.398809	tr|A0A0J5PRM9|A0A0J5PRM9_ASPFM|tr|A0A0J5Q1H9|A0A0J5Q1H9_ASPFM|tr|A0A0J5Q6L6|A0A0J5Q6L6_ASPFM|tr|A0A0J5PNA9|A0A0J5PNA9_ASPFM|tr|A0A0J5PQL3|A0A0J5PQL3_ASPFM|tr|A0A0J5Q0I9|A0A0J5Q0I9_ASPFM|tr|A0A0J5SQG5|A0A0J5SQG5_ASPFM|tr|A0A0J5SCF2|A0A0J5SCF2_ASPFM|tr|A0A0J5PI11|A0A0J5PI11_ASPFM|tr|A0A0J5SQA8|A0A0J5SQA8_ASPFM|tr|A0A0J5PMP0|A0A0J5PMP0_ASPFM|tr|A0A0J5PUK7|A0A0J5PUK7_ASPFM|tr|A0A0J5PKY1|A0A0J5PKY1_AS…	http://amigo.geneontology.org/cgi-bin/amigo/term_details?term=GO:0009058
plasma membrane part	Gene Ontology	GO:0044459	1	39	0.31123	0.39922	tr|A0A0J5Q4T5|A0A0J5Q4T5_ASPFM	http://amigo.geneontology.org/cgi-bin/amigo/term_details?term=GO:0044459
secondary alcohol metabolic process	Gene Ontology	GO:1902652	1	39	0.31123	0.39922	tr|A0A0J5PUK7|A0A0J5PUK7_ASPFM	http://amigo.geneontology.org/cgi-bin/amigo/term_details?term=GO:1902652
ATP metabolic process	Gene Ontology	GO:0046034	1	39	0.31123	0.39922	tr|A0A0J5PQL3|A0A0J5PQL3_ASPFM	http://amigo.geneontology.org/cgi-bin/amigo/term_details?term=GO:0046034
regulation of asexual reproduction	Gene Ontology	GO:1903664	1	39	0.31123	0.39922	tr|A0A0J5SQG5|A0A0J5SQG5_ASPFM	http://amigo.geneontology.org/cgi-bin/amigo/term_details?term=GO:1903664
glycoprotein biosynthetic process	Gene Ontology	GO:0009101	1	39	0.31123	0.39922	tr|A0A0J5SQA8|A0A0J5SQA8_ASPFM	http://amigo.geneontology.org/cgi-bin/amigo/term_details?term=GO:0009101
modified amino acid binding	Gene Ontology	GO:0072341	1	39	0.31123	0.39922	tr|A0A0J5PF72|A0A0J5PF72_ASPFM	http://amigo.geneontology.org/cgi-bin/amigo/term_details?term=GO:0072341
spindle	Gene Ontology	GO:0005819	2	120	0.312298	0.40019	tr|A0A0J5PKZ7|A0A0J5PKZ7_ASPFM|tr|A0A0J5PMP0|A0A0J5PMP0_ASPFM	http://amigo.geneontology.org/cgi-bin/amigo/term_details?term=GO:0005819
response to starvation	Gene Ontology	GO:0042594	2	121	0.315715	0.403804	tr|A0A0J5PNA9|A0A0J5PNA9_ASPFM|tr|A0A0J5PHI4|A0A0J5PHI4_ASPFM	http://amigo.geneontology.org/cgi-bin/amigo/term_details?term=GO:0042594
monooxygenase activity	Gene Ontology	GO:0004497	1	40	0.317634	0.403804	tr|A0A0J5PVE0|A0A0J5PVE0_ASPFM	http://amigo.geneontology.org/cgi-bin/amigo/term_details?term=GO:0004497
active ion transmembrane transporter activity	Gene Ontology	GO:0022853	1	40	0.317634	0.403804	tr|A0A0J5PQL3|A0A0J5PQL3_ASPFM	http://amigo.geneontology.org/cgi-bin/amigo/term_details?term=GO:0022853
secondary active transmembrane transporter activity	Gene Ontology	GO:0015291	1	40	0.317634	0.403804	tr|A0A0J5Q4T5|A0A0J5Q4T5_ASPFM	http://amigo.geneontology.org/cgi-bin/amigo/term_details?term=GO:0015291
hexose metabolic process	Gene Ontology	GO:0019318	1	40	0.317634	0.403804	tr|A0A0J5SQA8|A0A0J5SQA8_ASPFM	http://amigo.geneontology.org/cgi-bin/amigo/term_details?term=GO:0019318
negative regulation of reproductive process	Gene Ontology	GO:2000242	1	40	0.317634	0.403804	tr|A0A0J5PMP0|A0A0J5PMP0_ASPFM	http://amigo.geneontology.org/cgi-bin/amigo/term_details?term=GO:2000242
cellular component disassembly	Gene Ontology	GO:0022411	1	40	0.317634	0.403804	tr|A0A0J5PIQ5|A0A0J5PIQ5_ASPFM	http://amigo.geneontology.org/cgi-bin/amigo/term_details?term=GO:0022411
negative regulation of transcription from RNA polymerase II promoter	Gene Ontology	GO:0000122	1	40	0.317634	0.403804	tr|A0A0J5PMP0|A0A0J5PMP0_ASPFM	http://amigo.geneontology.org/cgi-bin/amigo/term_details?term=GO:0000122
nuclear lumen	Gene Ontology	GO:0031981	5	399	0.319272	0.405485	tr|A0A0J5PKZ7|A0A0J5PKZ7_ASPFM|tr|A0A0J5PNA9|A0A0J5PNA9_ASPFM|tr|A0A0J5PVE5|A0A0J5PVE5_ASPFM|tr|A0A0J5PH08|A0A0J5PH08_ASPFM|tr|A0A0J5PNE9|A0A0J5PNE9_ASPFM	http://amigo.geneontology.org/cgi-bin/amigo/term_details?term=GO:0031981
cellular homeostasis	Gene Ontology	GO:0019725	2	123	0.322539	0.409229	tr|A0A0J5Q3U7|A0A0J5Q3U7_ASPFM|tr|A0A0J5SQG5|A0A0J5SQG5_ASPFM	http://amigo.geneontology.org/cgi-bin/amigo/term_details?term=GO:0019725
glycoprotein metabolic process	Gene Ontology	GO:0009100	1	41	0.323979	0.410245	tr|A0A0J5SQA8|A0A0J5SQA8_ASPFM	http://amigo.geneontology.org/cgi-bin/amigo/term_details?term=GO:0009100
RNA catabolic process	Gene Ontology	GO:0006401	1	41	0.323979	0.410245	tr|A0A0J5SKW5|A0A0J5SKW5_ASPFM	http://amigo.geneontology.org/cgi-bin/amigo/term_details?term=GO:0006401
endoplasmic reticulum	Gene Ontology	GO:0005783	4	307	0.325198	0.410307	tr|A0A0J5PN06|A0A0J5PN06_ASPFM|tr|A0A0J5SQG5|A0A0J5SQG5_ASPFM|tr|A0A0J5PUK7|A0A0J5PUK7_ASPFM|tr|A0A0J5PHI4|A0A0J5PHI4_ASPFM	http://amigo.geneontology.org/cgi-bin/amigo/term_details?term=GO:0005783
reproductive structure development	Gene Ontology	GO:0048608	2	124	0.325945	0.410307	tr|A0A0J5PRS9|A0A0J5PRS9_ASPFM|tr|A0A0J5Q1H9|A0A0J5Q1H9_ASPFM	http://amigo.geneontology.org/cgi-bin/amigo/term_details?term=GO:0048608
reproductive system development	Gene Ontology	GO:0061458	2	124	0.325945	0.410307	tr|A0A0J5PRS9|A0A0J5PRS9_ASPFM|tr|A0A0J5Q1H9|A0A0J5Q1H9_ASPFM	http://amigo.geneontology.org/cgi-bin/amigo/term_details?term=GO:0061458
system development	Gene Ontology	GO:0048731	2	124	0.325945	0.410307	tr|A0A0J5PRS9|A0A0J5PRS9_ASPFM|tr|A0A0J5Q1H9|A0A0J5Q1H9_ASPFM	http://amigo.geneontology.org/cgi-bin/amigo/term_details?term=GO:0048731
animal organ development	Gene Ontology	GO:0048513	2	124	0.325945	0.410307	tr|A0A0J5PRS9|A0A0J5PRS9_ASPFM|tr|A0A0J5Q1H9|A0A0J5Q1H9_ASPFM	http://amigo.geneontology.org/cgi-bin/amigo/term_details?term=GO:0048513
spore-bearing organ development	Gene Ontology	GO:0075259	2	124	0.325945	0.410307	tr|A0A0J5PRS9|A0A0J5PRS9_ASPFM|tr|A0A0J5Q1H9|A0A0J5Q1H9_ASPFM	http://amigo.geneontology.org/cgi-bin/amigo/term_details?term=GO:0075259
cellular nitrogen compound biosynthetic process	Gene Ontology	GO:0044271	10	895	0.326895	0.4111	tr|A0A0J5PRM9|A0A0J5PRM9_ASPFM|tr|A0A0J5Q4L0|A0A0J5Q4L0_ASPFM|tr|A0A0J5PKY1|A0A0J5PKY1_ASPFM|tr|A0A0J5PNA9|A0A0J5PNA9_ASPFM|tr|A0A0J5SQG5|A0A0J5SQG5_ASPFM|tr|A0A0J5Q0I9|A0A0J5Q0I9_ASPFM|tr|A0A0J5PQL3|A0A0J5PQL3_ASPFM|tr|A0A0J5PI11|A0A0J5PI11_ASPFM|tr|A0A0J5PMP0|A0A0J5PMP0_ASPFM|tr|A0A0J5PIQ5|A0A0J5PIQ5_ASPFM	http://amigo.geneontology.org/cgi-bin/amigo/term_details?term=GO:0044271
multicellular organism development	Gene Ontology	GO:0007275	2	125	0.329347	0.413315	tr|A0A0J5PRS9|A0A0J5PRS9_ASPFM|tr|A0A0J5Q1H9|A0A0J5Q1H9_ASPFM	http://amigo.geneontology.org/cgi-bin/amigo/term_details?term=GO:0007275
cell cycle checkpoint	Gene Ontology	GO:0000075	1	42	0.330265	0.413315	tr|A0A0J5PMP0|A0A0J5PMP0_ASPFM	http://amigo.geneontology.org/cgi-bin/amigo/term_details?term=GO:0000075
polysaccharide biosynthetic process	Gene Ontology	GO:0000271	1	42	0.330265	0.413315	tr|A0A0J5PMP0|A0A0J5PMP0_ASPFM	http://amigo.geneontology.org/cgi-bin/amigo/term_details?term=GO:0000271
regulation of sporulation resulting in formation of a cellular spore	Gene Ontology	GO:0042173	1	42	0.330265	0.413315	tr|A0A0J5SQG5|A0A0J5SQG5_ASPFM	http://amigo.geneontology.org/cgi-bin/amigo/term_details?term=GO:0042173
cellular polysaccharide biosynthetic process	Gene Ontology	GO:0033692	1	42	0.330265	0.413315	tr|A0A0J5PMP0|A0A0J5PMP0_ASPFM	http://amigo.geneontology.org/cgi-bin/amigo/term_details?term=GO:0033692
response to stimulus	Gene Ontology	GO:0050896	9	800	0.333171	0.416545	tr|A0A0J5PRM9|A0A0J5PRM9_ASPFM|tr|A0A0J5PHI4|A0A0J5PHI4_ASPFM|tr|A0A0J5PNA9|A0A0J5PNA9_ASPFM|tr|A0A0J5SQG5|A0A0J5SQG5_ASPFM|tr|A0A0J5PV51|A0A0J5PV51_ASPFM|tr|A0A0J5PR80|A0A0J5PR80_ASPFM|tr|A0A0J5PRS9|A0A0J5PRS9_ASPFM|tr|A0A0J5PMP0|A0A0J5PMP0_ASPFM|tr|A0A0J5Q3U7|A0A0J5Q3U7_ASPFM	http://amigo.geneontology.org/cgi-bin/amigo/term_details?term=GO:0050896
purine ribonucleoside triphosphate metabolic process	Gene Ontology	GO:0009205	1	43	0.336494	0.418256	tr|A0A0J5PQL3|A0A0J5PQL3_ASPFM	http://amigo.geneontology.org/cgi-bin/amigo/term_details?term=GO:0009205
glycosylation	Gene Ontology	GO:0070085	1	43	0.336494	0.418256	tr|A0A0J5SQA8|A0A0J5SQA8_ASPFM	http://amigo.geneontology.org/cgi-bin/amigo/term_details?term=GO:0070085
hydrogen ion transmembrane transporter activity	Gene Ontology	GO:0015078	1	43	0.336494	0.418256	tr|A0A0J5PQL3|A0A0J5PQL3_ASPFM	http://amigo.geneontology.org/cgi-bin/amigo/term_details?term=GO:0015078
positive regulation of cellular protein metabolic process	Gene Ontology	GO:0032270	1	43	0.336494	0.418256	tr|A0A0J5PUB3|A0A0J5PUB3_ASPFM	http://amigo.geneontology.org/cgi-bin/amigo/term_details?term=GO:0032270
cytoplasmic, membrane-bounded vesicle	Gene Ontology	GO:0016023	1	43	0.336494	0.418256	tr|A0A0J5PZF9|A0A0J5PZF9_ASPFM	http://amigo.geneontology.org/cgi-bin/amigo/term_details?term=GO:0016023
membrane-bounded vesicle	Gene Ontology	GO:0031988	1	43	0.336494	0.418256	tr|A0A0J5PZF9|A0A0J5PZF9_ASPFM	http://amigo.geneontology.org/cgi-bin/amigo/term_details?term=GO:0031988
ATPase activity, coupled	Gene Ontology	GO:0042623	2	128	0.339524	0.421439	tr|A0A0J5Q3U7|A0A0J5Q3U7_ASPFM|tr|A0A0J5PQL3|A0A0J5PQL3_ASPFM	http://amigo.geneontology.org/cgi-bin/amigo/term_details?term=GO:0042623
intracellular vesicle	Gene Ontology	GO:0097708	1	44	0.342666	0.421439	tr|A0A0J5PZF9|A0A0J5PZF9_ASPFM	http://amigo.geneontology.org/cgi-bin/amigo/term_details?term=GO:0097708
ribonucleoside triphosphate metabolic process	Gene Ontology	GO:0009199	1	44	0.342666	0.421439	tr|A0A0J5PQL3|A0A0J5PQL3_ASPFM	http://amigo.geneontology.org/cgi-bin/amigo/term_details?term=GO:0009199
cellular bud	Gene Ontology	GO:0005933	1	44	0.342666	0.421439	tr|A0A0J5PRS9|A0A0J5PRS9_ASPFM	http://amigo.geneontology.org/cgi-bin/amigo/term_details?term=GO:0005933
purine nucleoside triphosphate metabolic process	Gene Ontology	GO:0009144	1	44	0.342666	0.421439	tr|A0A0J5PQL3|A0A0J5PQL3_ASPFM	http://amigo.geneontology.org/cgi-bin/amigo/term_details?term=GO:0009144
90S preribosome	Gene Ontology	GO:0030686	1	44	0.342666	0.421439	tr|A0A0J5PKY1|A0A0J5PKY1_ASPFM	http://amigo.geneontology.org/cgi-bin/amigo/term_details?term=GO:0030686
cytoplasmic vesicle	Gene Ontology	GO:0031410	1	44	0.342666	0.421439	tr|A0A0J5PZF9|A0A0J5PZF9_ASPFM	http://amigo.geneontology.org/cgi-bin/amigo/term_details?term=GO:0031410
regulation of cell differentiation	Gene Ontology	GO:0045595	1	44	0.342666	0.421439	tr|A0A0J5SQG5|A0A0J5SQG5_ASPFM	http://amigo.geneontology.org/cgi-bin/amigo/term_details?term=GO:0045595
RNA splicing	Gene Ontology	GO:0008380	1	44	0.342666	0.421439	tr|A0A0J5PNE9|A0A0J5PNE9_ASPFM	http://amigo.geneontology.org/cgi-bin/amigo/term_details?term=GO:0008380
vesicle	Gene Ontology	GO:0031982	1	44	0.342666	0.421439	tr|A0A0J5PZF9|A0A0J5PZF9_ASPFM	http://amigo.geneontology.org/cgi-bin/amigo/term_details?term=GO:0031982
cytokinetic process	Gene Ontology	GO:0032506	1	44	0.342666	0.421439	tr|A0A0J5PMP0|A0A0J5PMP0_ASPFM	http://amigo.geneontology.org/cgi-bin/amigo/term_details?term=GO:0032506
symbiosis, encompassing mutualism through parasitism	Gene Ontology	GO:0044403	1	45	0.34878	0.427323	tr|A0A0J5SQG5|A0A0J5SQG5_ASPFM	http://amigo.geneontology.org/cgi-bin/amigo/term_details?term=GO:0044403
positive regulation of protein metabolic process	Gene Ontology	GO:0051247	1	45	0.34878	0.427323	tr|A0A0J5PUB3|A0A0J5PUB3_ASPFM	http://amigo.geneontology.org/cgi-bin/amigo/term_details?term=GO:0051247
fungal-type cell wall biogenesis	Gene Ontology	GO:0009272	1	45	0.34878	0.427323	tr|A0A0J5PMP0|A0A0J5PMP0_ASPFM	http://amigo.geneontology.org/cgi-bin/amigo/term_details?term=GO:0009272
negative regulation of organelle organization	Gene Ontology	GO:0010639	1	45	0.34878	0.427323	tr|A0A0J5PMP0|A0A0J5PMP0_ASPFM	http://amigo.geneontology.org/cgi-bin/amigo/term_details?term=GO:0010639
single-organism cellular localization	Gene Ontology	GO:1902580	2	131	0.349656	0.427987	tr|A0A0J5PKZ7|A0A0J5PKZ7_ASPFM|tr|A0A0J5SQG5|A0A0J5SQG5_ASPFM	http://amigo.geneontology.org/cgi-bin/amigo/term_details?term=GO:1902580
microtubule cytoskeleton	Gene Ontology	GO:0015630	2	132	0.353022	0.431452	tr|A0A0J5PKZ7|A0A0J5PKZ7_ASPFM|tr|A0A0J5PMP0|A0A0J5PMP0_ASPFM	http://amigo.geneontology.org/cgi-bin/amigo/term_details?term=GO:0015630
microtubule cytoskeleton organization	Gene Ontology	GO:0000226	1	46	0.354839	0.431452	tr|A0A0J5PKZ7|A0A0J5PKZ7_ASPFM	http://amigo.geneontology.org/cgi-bin/amigo/term_details?term=GO:0000226
transferase activity, transferring alkyl or aryl (other than methyl) groups	Gene Ontology	GO:0016765	1	46	0.354839	0.431452	tr|A0A0J5PUK7|A0A0J5PUK7_ASPFM	http://amigo.geneontology.org/cgi-bin/amigo/term_details?term=GO:0016765
ribosomal large subunit biogenesis	Gene Ontology	GO:0042273	1	46	0.354839	0.431452	tr|A0A0J5PKY1|A0A0J5PKY1_ASPFM	http://amigo.geneontology.org/cgi-bin/amigo/term_details?term=GO:0042273
cellular transition metal ion homeostasis	Gene Ontology	GO:0046916	1	46	0.354839	0.431452	tr|A0A0J5Q3U7|A0A0J5Q3U7_ASPFM	http://amigo.geneontology.org/cgi-bin/amigo/term_details?term=GO:0046916
posttranscriptional regulation of gene expression	Gene Ontology	GO:0010608	1	46	0.354839	0.431452	tr|A0A0J5PIQ5|A0A0J5PIQ5_ASPFM	http://amigo.geneontology.org/cgi-bin/amigo/term_details?term=GO:0010608
transition metal ion homeostasis	Gene Ontology	GO:0055076	1	46	0.354839	0.431452	tr|A0A0J5Q3U7|A0A0J5Q3U7_ASPFM	http://amigo.geneontology.org/cgi-bin/amigo/term_details?term=GO:0055076
cellular macromolecule biosynthetic process	Gene Ontology	GO:0034645	9	818	0.357208	0.433922	tr|A0A0J5Q4L0|A0A0J5Q4L0_ASPFM|tr|A0A0J5PKY1|A0A0J5PKY1_ASPFM|tr|A0A0J5PNA9|A0A0J5PNA9_ASPFM|tr|A0A0J5Q0I9|A0A0J5Q0I9_ASPFM|tr|A0A0J5SQG5|A0A0J5SQG5_ASPFM|tr|A0A0J5PI11|A0A0J5PI11_ASPFM|tr|A0A0J5SQA8|A0A0J5SQA8_ASPFM|tr|A0A0J5PMP0|A0A0J5PMP0_ASPFM|tr|A0A0J5PIQ5|A0A0J5PIQ5_ASPFM	http://amigo.geneontology.org/cgi-bin/amigo/term_details?term=GO:0034645
hyphal growth	Gene Ontology	GO:0030448	2	134	0.359737	0.436581	tr|A0A0J5SQG5|A0A0J5SQG5_ASPFM|tr|A0A0J5Q1B9|A0A0J5Q1B9_ASPFM	http://amigo.geneontology.org/cgi-bin/amigo/term_details?term=GO:0030448
monosaccharide metabolic process	Gene Ontology	GO:0005996	1	47	0.360842	0.436683	tr|A0A0J5SQA8|A0A0J5SQA8_ASPFM	http://amigo.geneontology.org/cgi-bin/amigo/term_details?term=GO:0005996
cell wall polysaccharide metabolic process	Gene Ontology	GO:0010383	1	47	0.360842	0.436683	tr|A0A0J5PMP0|A0A0J5PMP0_ASPFM	http://amigo.geneontology.org/cgi-bin/amigo/term_details?term=GO:0010383
interspecies interaction between organisms	Gene Ontology	GO:0044419	1	47	0.360842	0.436683	tr|A0A0J5SQG5|A0A0J5SQG5_ASPFM	http://amigo.geneontology.org/cgi-bin/amigo/term_details?term=GO:0044419
organic substance catabolic process	Gene Ontology	GO:1901575	5	422	0.361795	0.437425	tr|A0A0J5PUB3|A0A0J5PUB3_ASPFM|tr|A0A0J5Q2W2|A0A0J5Q2W2_ASPFM|tr|A0A0J5PVE5|A0A0J5PVE5_ASPFM|tr|A0A0J5PDH8|A0A0J5PDH8_ASPFM|tr|A0A0J5SKW5|A0A0J5SKW5_ASPFM	http://amigo.geneontology.org/cgi-bin/amigo/term_details?term=GO:1901575
macromolecule biosynthetic process	Gene Ontology	GO:0009059	9	823	0.363934	0.439596	tr|A0A0J5Q4L0|A0A0J5Q4L0_ASPFM|tr|A0A0J5PKY1|A0A0J5PKY1_ASPFM|tr|A0A0J5PNA9|A0A0J5PNA9_ASPFM|tr|A0A0J5Q0I9|A0A0J5Q0I9_ASPFM|tr|A0A0J5SQG5|A0A0J5SQG5_ASPFM|tr|A0A0J5PI11|A0A0J5PI11_ASPFM|tr|A0A0J5SQA8|A0A0J5SQA8_ASPFM|tr|A0A0J5PMP0|A0A0J5PMP0_ASPFM|tr|A0A0J5PIQ5|A0A0J5PIQ5_ASPFM	http://amigo.geneontology.org/cgi-bin/amigo/term_details?term=GO:0009059
steroid metabolic process	Gene Ontology	GO:0008202	1	48	0.366789	0.441799	tr|A0A0J5PUK7|A0A0J5PUK7_ASPFM	http://amigo.geneontology.org/cgi-bin/amigo/term_details?term=GO:0008202
protein localization to membrane	Gene Ontology	GO:0072657	1	48	0.366789	0.441799	tr|A0A0J5SQG5|A0A0J5SQG5_ASPFM	http://amigo.geneontology.org/cgi-bin/amigo/term_details?term=GO:0072657
response to oxygen-containing compound	Gene Ontology	GO:1901700	1	48	0.366789	0.441799	tr|A0A0J5SQG5|A0A0J5SQG5_ASPFM	http://amigo.geneontology.org/cgi-bin/amigo/term_details?term=GO:1901700
cellular glucan metabolic process	Gene Ontology	GO:0006073	1	49	0.372682	0.447637	tr|A0A0J5PMP0|A0A0J5PMP0_ASPFM	http://amigo.geneontology.org/cgi-bin/amigo/term_details?term=GO:0006073
negative regulation of mitotic cell cycle	Gene Ontology	GO:0045930	1	49	0.372682	0.447637	tr|A0A0J5PMP0|A0A0J5PMP0_ASPFM	http://amigo.geneontology.org/cgi-bin/amigo/term_details?term=GO:0045930
integral component of organelle membrane	Gene Ontology	GO:0031301	1	49	0.372682	0.447637	tr|A0A0J5Q5A4|A0A0J5Q5A4_ASPFM	http://amigo.geneontology.org/cgi-bin/amigo/term_details?term=GO:0031301
chromosome organization	Gene Ontology	GO:0051276	3	234	0.376645	0.451552	tr|A0A0J5PVE5|A0A0J5PVE5_ASPFM|tr|A0A0J5PMP0|A0A0J5PMP0_ASPFM|tr|A0A0J5Q6M9|A0A0J5Q6M9_ASPFM	http://amigo.geneontology.org/cgi-bin/amigo/term_details?term=GO:0051276
anatomical structure formation involved in morphogenesis	Gene Ontology	GO:0048646	3	234	0.376645	0.451552	tr|A0A0J5PKZ7|A0A0J5PKZ7_ASPFM|tr|A0A0J5PMP0|A0A0J5PMP0_ASPFM|tr|A0A0J5SQG5|A0A0J5SQG5_ASPFM	http://amigo.geneontology.org/cgi-bin/amigo/term_details?term=GO:0048646
cell septum	Gene Ontology	GO:0030428	1	50	0.37852	0.451692	tr|A0A0J5SQG5|A0A0J5SQG5_ASPFM	http://amigo.geneontology.org/cgi-bin/amigo/term_details?term=GO:0030428
poly(A) RNA binding	Gene Ontology	GO:0044822	1	50	0.37852	0.451692	tr|A0A0J5Q4L0|A0A0J5Q4L0_ASPFM	http://amigo.geneontology.org/cgi-bin/amigo/term_details?term=GO:0044822
nucleoside triphosphate metabolic process	Gene Ontology	GO:0009141	1	50	0.37852	0.451692	tr|A0A0J5PQL3|A0A0J5PQL3_ASPFM	http://amigo.geneontology.org/cgi-bin/amigo/term_details?term=GO:0009141
intrinsic component of organelle membrane	Gene Ontology	GO:0031300	1	50	0.37852	0.451692	tr|A0A0J5Q5A4|A0A0J5Q5A4_ASPFM	http://amigo.geneontology.org/cgi-bin/amigo/term_details?term=GO:0031300
mRNA binding	Gene Ontology	GO:0003729	1	50	0.37852	0.451692	tr|A0A0J5Q4L0|A0A0J5Q4L0_ASPFM	http://amigo.geneontology.org/cgi-bin/amigo/term_details?term=GO:0003729
catalytic complex	Gene Ontology	GO:1902494	3	236	0.381698	0.455061	tr|A0A0J5PKZ7|A0A0J5PKZ7_ASPFM|tr|A0A0J5Q1L6|A0A0J5Q1L6_ASPFM|tr|A0A0J5PDH8|A0A0J5PDH8_ASPFM	http://amigo.geneontology.org/cgi-bin/amigo/term_details?term=GO:1902494
lipid biosynthetic process	Gene Ontology	GO:0008610	2	142	0.386337	0.460163	tr|A0A0J5PUK7|A0A0J5PUK7_ASPFM|tr|A0A0J5Q6L6|A0A0J5Q6L6_ASPFM	http://amigo.geneontology.org/cgi-bin/amigo/term_details?term=GO:0008610
cell morphogenesis	Gene Ontology	GO:0000902	1	52	0.390037	0.46414	tr|A0A0J5SQG5|A0A0J5SQG5_ASPFM	http://amigo.geneontology.org/cgi-bin/amigo/term_details?term=GO:0000902
intracellular organelle lumen	Gene Ontology	GO:0070013	6	539	0.392342	0.465589	tr|A0A0J5PKZ7|A0A0J5PKZ7_ASPFM|tr|A0A0J5PVE5|A0A0J5PVE5_ASPFM|tr|A0A0J5PNA9|A0A0J5PNA9_ASPFM|tr|A0A0J5SCF2|A0A0J5SCF2_ASPFM|tr|A0A0J5PNE9|A0A0J5PNE9_ASPFM|tr|A0A0J5PH08|A0A0J5PH08_ASPFM	http://amigo.geneontology.org/cgi-bin/amigo/term_details?term=GO:0070013
membrane-enclosed lumen	Gene Ontology	GO:0031974	6	539	0.392342	0.465589	tr|A0A0J5PKZ7|A0A0J5PKZ7_ASPFM|tr|A0A0J5PVE5|A0A0J5PVE5_ASPFM|tr|A0A0J5PNA9|A0A0J5PNA9_ASPFM|tr|A0A0J5SCF2|A0A0J5SCF2_ASPFM|tr|A0A0J5PNE9|A0A0J5PNE9_ASPFM|tr|A0A0J5PH08|A0A0J5PH08_ASPFM	http://amigo.geneontology.org/cgi-bin/amigo/term_details?term=GO:0031974
organelle lumen	Gene Ontology	GO:0043233	6	539	0.392342	0.465589	tr|A0A0J5PKZ7|A0A0J5PKZ7_ASPFM|tr|A0A0J5PVE5|A0A0J5PVE5_ASPFM|tr|A0A0J5PNA9|A0A0J5PNA9_ASPFM|tr|A0A0J5SCF2|A0A0J5SCF2_ASPFM|tr|A0A0J5PNE9|A0A0J5PNE9_ASPFM|tr|A0A0J5PH08|A0A0J5PH08_ASPFM	http://amigo.geneontology.org/cgi-bin/amigo/term_details?term=GO:0043233
catabolic process	Gene Ontology	GO:0009056	5	439	0.393397	0.46641	tr|A0A0J5PUB3|A0A0J5PUB3_ASPFM|tr|A0A0J5Q2W2|A0A0J5Q2W2_ASPFM|tr|A0A0J5PVE5|A0A0J5PVE5_ASPFM|tr|A0A0J5PDH8|A0A0J5PDH8_ASPFM|tr|A0A0J5SKW5|A0A0J5SKW5_ASPFM	http://amigo.geneontology.org/cgi-bin/amigo/term_details?term=GO:0009056
negative regulation of cellular component organization	Gene Ontology	GO:0051129	1	53	0.395716	0.467863	tr|A0A0J5PMP0|A0A0J5PMP0_ASPFM	http://amigo.geneontology.org/cgi-bin/amigo/term_details?term=GO:0051129
regulation of intracellular signal transduction	Gene Ontology	GO:1902531	1	53	0.395716	0.467863	tr|A0A0J5PMP0|A0A0J5PMP0_ASPFM	http://amigo.geneontology.org/cgi-bin/amigo/term_details?term=GO:1902531
endopeptidase activity	Gene Ontology	GO:0004175	1	53	0.395716	0.467863	tr|A0A0J5Q2W2|A0A0J5Q2W2_ASPFM	http://amigo.geneontology.org/cgi-bin/amigo/term_details?term=GO:0004175
negative regulation of macromolecule metabolic process	Gene Ontology	GO:0010605	2	145	0.396192	0.467995	tr|A0A0J5Q0U9|A0A0J5Q0U9_ASPFM|tr|A0A0J5PMP0|A0A0J5PMP0_ASPFM	http://amigo.geneontology.org/cgi-bin/amigo/term_details?term=GO:0010605
nucleobase-containing compound metabolic process	Gene Ontology	GO:0006139	11	1053	0.397025	0.468548	tr|A0A0J5PRM9|A0A0J5PRM9_ASPFM|tr|A0A0J5PWF4|A0A0J5PWF4_ASPFM|tr|A0A0J5SKW5|A0A0J5SKW5_ASPFM|tr|A0A0J5SQG5|A0A0J5SQG5_ASPFM|tr|A0A0J5PQL3|A0A0J5PQL3_ASPFM|tr|A0A0J5PNE9|A0A0J5PNE9_ASPFM|tr|A0A0J5PR80|A0A0J5PR80_ASPFM|tr|A0A0J5Q4L0|A0A0J5Q4L0_ASPFM|tr|A0A0J5PRC9|A0A0J5PRC9_ASPFM|tr|A0A0J5PMP0|A0A0J5PMP0_ASPFM|tr|A0A0J5PIQ5|A0A0J5PIQ5_ASPFM	http://amigo.geneontology.org/cgi-bin/amigo/term_details?term=GO:0006139
catalytic activity	Gene Ontology	GO:0003824	27	2724	0.398525	0.469886	tr|A0A0J5PF02|A0A0J5PF02_ASPFM|tr|A0A0J5Q2W2|A0A0J5Q2W2_ASPFM|tr|A0A0J5PQL3|A0A0J5PQL3_ASPFM|tr|A0A0J5Q3U7|A0A0J5Q3U7_ASPFM|tr|A0A0J5STT4|A0A0J5STT4_ASPFM|tr|A0A0J5PRM9|A0A0J5PRM9_ASPFM|tr|A0A0J5PWF4|A0A0J5PWF4_ASPFM|tr|A0A0J5PUK7|A0A0J5PUK7_ASPFM|tr|A0A0J5PKZ7|A0A0J5PKZ7_ASPFM|tr|A0A0J5PV51|A0A0J5PV51_ASPFM|tr|A0A0J5PVE0|A0A0J5PVE0_ASPFM|tr|A0A0J5PTV6|A0A0J5PTV6_ASPFM|tr|A0A0J5PDH8|A0A0J5PDH8_AS…	http://amigo.geneontology.org/cgi-bin/amigo/term_details?term=GO:0003824
regulation of localization	Gene Ontology	GO:0032879	1	54	0.401342	0.472774	tr|A0A0J5SQG5|A0A0J5SQG5_ASPFM	http://amigo.geneontology.org/cgi-bin/amigo/term_details?term=GO:0032879
substrate-specific transmembrane transporter activity	Gene Ontology	GO:0022891	3	245	0.404326	0.475852	tr|A0A0J5PN06|A0A0J5PN06_ASPFM|tr|A0A0J5Q4T5|A0A0J5Q4T5_ASPFM|tr|A0A0J5PQL3|A0A0J5PQL3_ASPFM	http://amigo.geneontology.org/cgi-bin/amigo/term_details?term=GO:0022891
cofactor metabolic process	Gene Ontology	GO:0051186	2	148	0.405977	0.477152	tr|A0A0J5PRC9|A0A0J5PRC9_ASPFM|tr|A0A0J5PWF4|A0A0J5PWF4_ASPFM	http://amigo.geneontology.org/cgi-bin/amigo/term_details?term=GO:0051186
amide binding	Gene Ontology	GO:0033218	1	55	0.406917	0.477152	tr|A0A0J5PF72|A0A0J5PF72_ASPFM	http://amigo.geneontology.org/cgi-bin/amigo/term_details?term=GO:0033218
monovalent inorganic cation transmembrane transporter activity	Gene Ontology	GO:0015077	1	55	0.406917	0.477152	tr|A0A0J5PQL3|A0A0J5PQL3_ASPFM	http://amigo.geneontology.org/cgi-bin/amigo/term_details?term=GO:0015077
regulation of sporulation	Gene Ontology	GO:0043937	1	55	0.406917	0.477152	tr|A0A0J5SQG5|A0A0J5SQG5_ASPFM	http://amigo.geneontology.org/cgi-bin/amigo/term_details?term=GO:0043937
regulation of macromolecule metabolic process	Gene Ontology	GO:0060255	6	548	0.40746	0.477297	tr|A0A0J5SKW5|A0A0J5SKW5_ASPFM|tr|A0A0J5Q0U9|A0A0J5Q0U9_ASPFM|tr|A0A0J5SQG5|A0A0J5SQG5_ASPFM|tr|A0A0J5PUB3|A0A0J5PUB3_ASPFM|tr|A0A0J5PMP0|A0A0J5PMP0_ASPFM|tr|A0A0J5PIQ5|A0A0J5PIQ5_ASPFM	http://amigo.geneontology.org/cgi-bin/amigo/term_details?term=GO:0060255
organic cyclic compound metabolic process	Gene Ontology	GO:1901360	13	1269	0.407784	0.477297	tr|A0A0J5PRM9|A0A0J5PRM9_ASPFM|tr|A0A0J5PWF4|A0A0J5PWF4_ASPFM|tr|A0A0J5SKW5|A0A0J5SKW5_ASPFM|tr|A0A0J5Q4L0|A0A0J5Q4L0_ASPFM|tr|A0A0J5PUK7|A0A0J5PUK7_ASPFM|tr|A0A0J5SQG5|A0A0J5SQG5_ASPFM|tr|A0A0J5PQL3|A0A0J5PQL3_ASPFM|tr|A0A0J5PNE9|A0A0J5PNE9_ASPFM|tr|A0A0J5PR80|A0A0J5PR80_ASPFM|tr|A0A0J5Q1H9|A0A0J5Q1H9_ASPFM|tr|A0A0J5PRC9|A0A0J5PRC9_ASPFM|tr|A0A0J5PMP0|A0A0J5PMP0_ASPFM|tr|A0A0J5PIQ5|A0A0J5PIQ5_AS…	http://amigo.geneontology.org/cgi-bin/amigo/term_details?term=GO:1901360
cellular amino acid metabolic process	Gene Ontology	GO:0006520	2	149	0.409222	0.478544	tr|A0A0J5SCF2|A0A0J5SCF2_ASPFM|tr|A0A0J5Q1H9|A0A0J5Q1H9_ASPFM	http://amigo.geneontology.org/cgi-bin/amigo/term_details?term=GO:0006520
nuclear part	Gene Ontology	GO:0044428	6	550	0.410817	0.479708	tr|A0A0J5PKZ7|A0A0J5PKZ7_ASPFM|tr|A0A0J5PVE5|A0A0J5PVE5_ASPFM|tr|A0A0J5PNA9|A0A0J5PNA9_ASPFM|tr|A0A0J5Q1L6|A0A0J5Q1L6_ASPFM|tr|A0A0J5PH08|A0A0J5PH08_ASPFM|tr|A0A0J5PNE9|A0A0J5PNE9_ASPFM	http://amigo.geneontology.org/cgi-bin/amigo/term_details?term=GO:0044428
ribonucleoprotein complex assembly	Gene Ontology	GO:0022618	1	56	0.41244	0.479708	tr|A0A0J5PKY1|A0A0J5PKY1_ASPFM	http://amigo.geneontology.org/cgi-bin/amigo/term_details?term=GO:0022618
mitotic cytokinesis	Gene Ontology	GO:0000281	1	56	0.41244	0.479708	tr|A0A0J5PMP0|A0A0J5PMP0_ASPFM	http://amigo.geneontology.org/cgi-bin/amigo/term_details?term=GO:0000281
cellular carbohydrate biosynthetic process	Gene Ontology	GO:0034637	1	56	0.41244	0.479708	tr|A0A0J5PMP0|A0A0J5PMP0_ASPFM	http://amigo.geneontology.org/cgi-bin/amigo/term_details?term=GO:0034637
negative regulation of cellular metabolic process	Gene Ontology	GO:0031324	2	150	0.412459	0.479708	tr|A0A0J5Q0U9|A0A0J5Q0U9_ASPFM|tr|A0A0J5PMP0|A0A0J5PMP0_ASPFM	http://amigo.geneontology.org/cgi-bin/amigo/term_details?term=GO:0031324
ncRNA processing	Gene Ontology	GO:0034470	2	150	0.412459	0.479708	tr|A0A0J5PNE9|A0A0J5PNE9_ASPFM|tr|A0A0J5Q4L0|A0A0J5Q4L0_ASPFM	http://amigo.geneontology.org/cgi-bin/amigo/term_details?term=GO:0034470
homeostatic process	Gene Ontology	GO:0042592	2	151	0.415688	0.483025	tr|A0A0J5Q3U7|A0A0J5Q3U7_ASPFM|tr|A0A0J5SQG5|A0A0J5SQG5_ASPFM	http://amigo.geneontology.org/cgi-bin/amigo/term_details?term=GO:0042592
nucleobase-containing compound catabolic process	Gene Ontology	GO:0034655	1	57	0.417912	0.483423	tr|A0A0J5SKW5|A0A0J5SKW5_ASPFM	http://amigo.geneontology.org/cgi-bin/amigo/term_details?term=GO:0034655
purine nucleoside monophosphate metabolic process	Gene Ontology	GO:0009126	1	57	0.417912	0.483423	tr|A0A0J5PQL3|A0A0J5PQL3_ASPFM	http://amigo.geneontology.org/cgi-bin/amigo/term_details?term=GO:0009126
purine ribonucleoside monophosphate metabolic process	Gene Ontology	GO:0009167	1	57	0.417912	0.483423	tr|A0A0J5PQL3|A0A0J5PQL3_ASPFM	http://amigo.geneontology.org/cgi-bin/amigo/term_details?term=GO:0009167
ribonucleoprotein complex subunit organization	Gene Ontology	GO:0071826	1	57	0.417912	0.483423	tr|A0A0J5PKY1|A0A0J5PKY1_ASPFM	http://amigo.geneontology.org/cgi-bin/amigo/term_details?term=GO:0071826
energy derivation by oxidation of organic compounds	Gene Ontology	GO:0015980	1	57	0.417912	0.483423	tr|A0A0J5PMP0|A0A0J5PMP0_ASPFM	http://amigo.geneontology.org/cgi-bin/amigo/term_details?term=GO:0015980
cellular response to DNA damage stimulus	Gene Ontology	GO:0006974	2	152	0.418907	0.4838	tr|A0A0J5PMP0|A0A0J5PMP0_ASPFM|tr|A0A0J5PR80|A0A0J5PR80_ASPFM	http://amigo.geneontology.org/cgi-bin/amigo/term_details?term=GO:0006974
regulation of biological quality	Gene Ontology	GO:0065008	3	251	0.419287	0.4838	tr|A0A0J5Q3U7|A0A0J5Q3U7_ASPFM|tr|A0A0J5PMP0|A0A0J5PMP0_ASPFM|tr|A0A0J5SQG5|A0A0J5SQG5_ASPFM	http://amigo.geneontology.org/cgi-bin/amigo/term_details?term=GO:0065008
purine ribonucleoside triphosphate binding	Gene Ontology	GO:0035639	5	453	0.419369	0.4838	tr|A0A0J5PRS9|A0A0J5PRS9_ASPFM|tr|A0A0J5Q3U7|A0A0J5Q3U7_ASPFM|tr|A0A0J5SQG5|A0A0J5SQG5_ASPFM|tr|A0A0J5STT4|A0A0J5STT4_ASPFM|tr|A0A0J5PV51|A0A0J5PV51_ASPFM	http://amigo.geneontology.org/cgi-bin/amigo/term_details?term=GO:0035639
regulation of primary metabolic process	Gene Ontology	GO:0080090	6	557	0.422558	0.487042	tr|A0A0J5SKW5|A0A0J5SKW5_ASPFM|tr|A0A0J5Q0U9|A0A0J5Q0U9_ASPFM|tr|A0A0J5SQG5|A0A0J5SQG5_ASPFM|tr|A0A0J5PUB3|A0A0J5PUB3_ASPFM|tr|A0A0J5PMP0|A0A0J5PMP0_ASPFM|tr|A0A0J5PIQ5|A0A0J5PIQ5_ASPFM	http://amigo.geneontology.org/cgi-bin/amigo/term_details?term=GO:0080090
cell wall biogenesis	Gene Ontology	GO:0042546	1	58	0.423335	0.487062	tr|A0A0J5PMP0|A0A0J5PMP0_ASPFM	http://amigo.geneontology.org/cgi-bin/amigo/term_details?term=GO:0042546
cytoskeleton-dependent cytokinesis	Gene Ontology	GO:0061640	1	58	0.423335	0.487062	tr|A0A0J5PMP0|A0A0J5PMP0_ASPFM	http://amigo.geneontology.org/cgi-bin/amigo/term_details?term=GO:0061640
ion binding	Gene Ontology	GO:0043167	8	764	0.424246	0.487674	tr|A0A0J5PMM3|A0A0J5PMM3_ASPFM|tr|A0A0J5Q166|A0A0J5Q166_ASPFM|tr|A0A0J5PRC9|A0A0J5PRC9_ASPFM|tr|A0A0J5SCF2|A0A0J5SCF2_ASPFM|tr|A0A0J5PVS4|A0A0J5PVS4_ASPFM|tr|A0A0J5PTV6|A0A0J5PTV6_ASPFM|tr|A0A0J5PMP0|A0A0J5PMP0_ASPFM|tr|A0A0J5PIQ5|A0A0J5PIQ5_ASPFM	http://amigo.geneontology.org/cgi-bin/amigo/term_details?term=GO:0043167
cellular aromatic compound metabolic process	Gene Ontology	GO:0006725	12	1181	0.426418	0.489732	tr|A0A0J5PRM9|A0A0J5PRM9_ASPFM|tr|A0A0J5PWF4|A0A0J5PWF4_ASPFM|tr|A0A0J5SKW5|A0A0J5SKW5_ASPFM|tr|A0A0J5Q4L0|A0A0J5Q4L0_ASPFM|tr|A0A0J5SQG5|A0A0J5SQG5_ASPFM|tr|A0A0J5PQL3|A0A0J5PQL3_ASPFM|tr|A0A0J5PNE9|A0A0J5PNE9_ASPFM|tr|A0A0J5PR80|A0A0J5PR80_ASPFM|tr|A0A0J5Q1H9|A0A0J5Q1H9_ASPFM|tr|A0A0J5PRC9|A0A0J5PRC9_ASPFM|tr|A0A0J5PMP0|A0A0J5PMP0_ASPFM|tr|A0A0J5PIQ5|A0A0J5PIQ5_ASPFM	http://amigo.geneontology.org/cgi-bin/amigo/term_details?term=GO:0006725
inorganic cation transmembrane transport	Gene Ontology	GO:0098662	1	59	0.428707	0.490605	tr|A0A0J5PQL3|A0A0J5PQL3_ASPFM	http://amigo.geneontology.org/cgi-bin/amigo/term_details?term=GO:0098662
DNA recombination	Gene Ontology	GO:0006310	1	59	0.428707	0.490605	tr|A0A0J5PR80|A0A0J5PR80_ASPFM	http://amigo.geneontology.org/cgi-bin/amigo/term_details?term=GO:0006310
glucan metabolic process	Gene Ontology	GO:0044042	1	59	0.428707	0.490605	tr|A0A0J5PMP0|A0A0J5PMP0_ASPFM	http://amigo.geneontology.org/cgi-bin/amigo/term_details?term=GO:0044042
purine ribonucleotide binding	Gene Ontology	GO:0032555	5	460	0.432301	0.492961	tr|A0A0J5PRS9|A0A0J5PRS9_ASPFM|tr|A0A0J5Q3U7|A0A0J5Q3U7_ASPFM|tr|A0A0J5SQG5|A0A0J5SQG5_ASPFM|tr|A0A0J5STT4|A0A0J5STT4_ASPFM|tr|A0A0J5PV51|A0A0J5PV51_ASPFM	http://amigo.geneontology.org/cgi-bin/amigo/term_details?term=GO:0032555
purine ribonucleoside binding	Gene Ontology	GO:0032550	5	460	0.432301	0.492961	tr|A0A0J5PRS9|A0A0J5PRS9_ASPFM|tr|A0A0J5Q3U7|A0A0J5Q3U7_ASPFM|tr|A0A0J5SQG5|A0A0J5SQG5_ASPFM|tr|A0A0J5STT4|A0A0J5STT4_ASPFM|tr|A0A0J5PV51|A0A0J5PV51_ASPFM	http://amigo.geneontology.org/cgi-bin/amigo/term_details?term=GO:0032550
ribonucleoside binding	Gene Ontology	GO:0032549	5	460	0.432301	0.492961	tr|A0A0J5PRS9|A0A0J5PRS9_ASPFM|tr|A0A0J5Q3U7|A0A0J5Q3U7_ASPFM|tr|A0A0J5SQG5|A0A0J5SQG5_ASPFM|tr|A0A0J5STT4|A0A0J5STT4_ASPFM|tr|A0A0J5PV51|A0A0J5PV51_ASPFM	http://amigo.geneontology.org/cgi-bin/amigo/term_details?term=GO:0032549
purine nucleoside binding	Gene Ontology	GO:0001883	5	460	0.432301	0.492961	tr|A0A0J5PRS9|A0A0J5PRS9_ASPFM|tr|A0A0J5Q3U7|A0A0J5Q3U7_ASPFM|tr|A0A0J5SQG5|A0A0J5SQG5_ASPFM|tr|A0A0J5STT4|A0A0J5STT4_ASPFM|tr|A0A0J5PV51|A0A0J5PV51_ASPFM	http://amigo.geneontology.org/cgi-bin/amigo/term_details?term=GO:0001883
ribonucleoside monophosphate metabolic process	Gene Ontology	GO:0009161	1	60	0.434029	0.493747	tr|A0A0J5PQL3|A0A0J5PQL3_ASPFM	http://amigo.geneontology.org/cgi-bin/amigo/term_details?term=GO:0009161
mRNA processing	Gene Ontology	GO:0006397	1	60	0.434029	0.493747	tr|A0A0J5PNE9|A0A0J5PNE9_ASPFM	http://amigo.geneontology.org/cgi-bin/amigo/term_details?term=GO:0006397
[truncated: 152 more rows]

## Sheet: cys_down_kegg
#Term	Database	ID	Input number	Background number	P-Value	Corrected P-Value	Input	Hyperlink
[truncated: 36 more rows]

[truncated: 4 more sheets: met_up_go, met_up_kegg, met_down_go, met_down_kegg]
