# Supplementary material for: Effects of amino acids on the lignocellulose degradation by Aspergillus fumigatus Z5: insights into performance, transcriptional, and proteomic profiles
Source: Biotechnol Biofuels. 2019 Jan 4;12:4. doi: 10.1186/s13068-018-1350-2 (PMC6318881; doi:10.1186/s13068-018-1350-2)
Supplement: Supplementary file 8 — Additional file 8: Dataset S7. KEGG and GO analysis results of the transcriptome of A. fumigatus Z5 in different treatments. [file 13068_2018_1350_MOESM8_ESM.xlsx]

## Sheet: cys_go_up
#Term	Database	ID	Input number	Background number	P-Value	Corrected P-Value	Input	Hyperlink
mycotoxin biosynthetic process	Gene Ontology	GO:0043386	9	20	2.40637e-07	0.000174928	KQ087358:1013167-1014595|KQ087358:1010971-1012453|KQ087358:1033352-1034924|KQ087358:1029916-1031545|KQ087358:1035226-1036289|KQ087358:1028456-1029328|KQ087368:348761-349952|KQ087358:1016612-1023117|KQ087368:351403-352769	http://amigo.geneontology.org/cgi-bin/amigo/term_details?term=GO:0043386
mycotoxin metabolic process	Gene Ontology	GO:0043385	9	21	3.33831e-07	0.000174928	KQ087358:1013167-1014595|KQ087358:1010971-1012453|KQ087358:1033352-1034924|KQ087358:1029916-1031545|KQ087358:1035226-1036289|KQ087358:1028456-1029328|KQ087368:348761-349952|KQ087358:1016612-1023117|KQ087368:351403-352769	http://amigo.geneontology.org/cgi-bin/amigo/term_details?term=GO:0043385
secondary metabolic process	Gene Ontology	GO:0019748	24	204	5.12348e-07	0.00017898	KQ087358:1680543-1681945|KQ087358:1010971-1012453|KQ087368:424746-426537|KQ087358:1033352-1034924|KQ087368:348761-349952|KQ087370:82247-83719|KQ087370:28124-30599|KQ087368:410167-412357|KQ087358:1013167-1014595|KQ087368:360409-362046|KQ087358:1003501-1007320|KQ087368:351403-352769|KQ087365:2159709-2160555|KQ087358:1029916-1031545|KQ087360:171314-172508|KQ087358:1028456-1029328|KQ087368:340286-340…	http://amigo.geneontology.org/cgi-bin/amigo/term_details?term=GO:0019748
secondary metabolite biosynthetic process	Gene Ontology	GO:0044550	21	164	7.81018e-07	0.000204627	KQ087365:2159709-2160555|KQ087358:1013167-1014595|KQ087358:1029916-1031545|KQ087368:360409-362046|KQ087358:1010971-1012453|KQ087370:75797-77440|KQ087370:28124-30599|KQ087358:1033352-1034924|KQ087368:410167-412357|KQ087362:1972584-1974621|KQ087368:339476-340012|KQ087360:171314-172508|KQ087358:1035226-1036289|KQ087370:82247-83719|KQ087358:1028456-1029328|KQ087368:348761-349952|KQ087358:1016612-1023…	http://amigo.geneontology.org/cgi-bin/amigo/term_details?term=GO:0044550
carbohydrate catabolic process	Gene Ontology	GO:0016052	16	113	5.22517e-06	0.00109519	KQ087360:997178-998173|KQ087367:218267-220072|KQ087367:276751-277801|KQ087365:2099302-2100451|KQ087360:999535-1000354|KQ087360:1043593-1045552|KQ087369:810603-811408|KQ087364:854832-858221|KQ087369:804966-806718|KQ087363:2651104-2652417|KQ087371:205036-207990|KQ087358:988176-989169|KQ087373:896451-898001|KQ087367:455950-456781|KQ087369:421874-423161|KQ087359:1491741-1492919	http://amigo.geneontology.org/cgi-bin/amigo/term_details?term=GO:0016052
oxidoreductase activity	Gene Ontology	GO:0016491	50	752	8.70388e-06	0.00152028	KQ087373:1095640-1096498|KQ087369:268428-269375|KQ087370:183021-184094|KQ087360:2861308-2862665|KQ087358:1033352-1034924|KQ087363:1452640-1453806|KQ087370:220220-222513|KQ087369:843849-845735|KQ087370:82247-83719|KQ087363:94563-96186|KQ087374:225941-226817|KQ087373:643298-644630|KQ087365:557223-558575|KQ087374:210259-212568|KQ087369:814467-815786|KQ087367:1550147-1551296|KQ087363:999702-1001317|K…	http://amigo.geneontology.org/cgi-bin/amigo/term_details?term=GO:0016491
single-organism metabolic process	Gene Ontology	GO:0044710	78	1396	1.0552e-05	0.00157979	KQ087367:547555-549291|KQ087368:410167-412357|KQ087373:518820-520652|KQ087373:1095640-1096498|KQ087358:1010971-1012453|KQ087365:2385862-2391569|KQ087367:307111-310254|KQ087368:424746-426537|KQ087358:1033352-1034924|KQ087363:1452640-1453806|KQ087360:1535766-1537176|KQ087364:854832-858221|KQ087358:1680543-1681945|KQ087367:423921-426010|KQ087370:220220-222513|KQ087369:843849-845735|KQ087370:82247-83…	http://amigo.geneontology.org/cgi-bin/amigo/term_details?term=GO:0044710
toxin biosynthetic process	Gene Ontology	GO:0009403	11	60	1.93303e-05	0.00253226	KQ087365:2159709-2160555|KQ087358:1013167-1014595|KQ087358:1010971-1012453|KQ087358:1033352-1034924|KQ087358:1029916-1031545|KQ087358:1035226-1036289|KQ087370:82247-83719|KQ087358:1028456-1029328|KQ087368:348761-349952|KQ087358:1016612-1023117|KQ087368:351403-352769	http://amigo.geneontology.org/cgi-bin/amigo/term_details?term=GO:0009403
toxin metabolic process	Gene Ontology	GO:0009404	11	61	2.21515e-05	0.00257941	KQ087365:2159709-2160555|KQ087358:1013167-1014595|KQ087358:1010971-1012453|KQ087358:1033352-1034924|KQ087358:1029916-1031545|KQ087358:1035226-1036289|KQ087370:82247-83719|KQ087358:1028456-1029328|KQ087368:348761-349952|KQ087358:1016612-1023117|KQ087368:351403-352769	http://amigo.geneontology.org/cgi-bin/amigo/term_details?term=GO:0009404
gliotoxin metabolic process	Gene Ontology	GO:2001308	6	14	3.3057e-05	0.00314943	KQ087358:1013167-1014595|KQ087358:1010971-1012453|KQ087358:1029916-1031545|KQ087358:1035226-1036289|KQ087358:1028456-1029328|KQ087358:1016612-1023117	http://amigo.geneontology.org/cgi-bin/amigo/term_details?term=GO:2001308
gliotoxin biosynthetic process	Gene Ontology	GO:2001310	6	14	3.3057e-05	0.00314943	KQ087358:1013167-1014595|KQ087358:1010971-1012453|KQ087358:1029916-1031545|KQ087358:1035226-1036289|KQ087358:1028456-1029328|KQ087358:1016612-1023117	http://amigo.geneontology.org/cgi-bin/amigo/term_details?term=GO:2001310
polysaccharide catabolic process	Gene Ontology	GO:0000272	11	66	4.22474e-05	0.0036896	KQ087360:997178-998173|KQ087367:276751-277801|KQ087365:2099302-2100451|KQ087360:999535-1000354|KQ087360:1043593-1045552|KQ087369:810603-811408|KQ087363:2651104-2652417|KQ087358:988176-989169|KQ087367:455950-456781|KQ087369:421874-423161|KQ087359:1491741-1492919	http://amigo.geneontology.org/cgi-bin/amigo/term_details?term=GO:0000272
catalytic activity	Gene Ontology	GO:0003824	126	2724	8.69077e-05	0.00700609	KQ087362:3048195-3048903|KQ087358:1680543-1681945|KQ087360:2861308-2862665|KQ087360:999535-1000354|KQ087358:1033352-1034924|KQ087359:31525-33642|KQ087364:854832-858221|KQ087360:1953270-1954293|KQ087359:2263883-2266350|KQ087360:1268336-1269852|KQ087363:2611182-2612288|KQ087365:2099302-2100451|KQ087362:3076957-3078700|KQ087370:100752-101595|KQ087367:1556227-1558387|KQ087364:55149-56373|KQ087360:647…	http://amigo.geneontology.org/cgi-bin/amigo/term_details?term=GO:0003824
lyase activity	Gene Ontology	GO:0016829	15	131	9.6395e-05	0.00721585	KQ087358:1680543-1681945|KQ087358:1013167-1014595|KQ087361:486265-487081|KQ087369:810603-811408|KQ087367:455950-456781|KQ087363:2562131-2563844|KQ087363:2651104-2652417|KQ087367:423921-426010|KQ087364:76654-79093|KQ087362:1249785-1252401|KQ087369:836595-837678|KQ087368:22419-24214|KQ087369:421874-423161|KQ087365:2256748-2257824|KQ087360:1268336-1269852	http://amigo.geneontology.org/cgi-bin/amigo/term_details?term=GO:0016829
carbohydrate metabolic process	Gene Ontology	GO:0005975	29	400	0.000203908	0.0142464	KQ087367:307111-310254|KQ087360:999535-1000354|KQ087363:1452640-1453806|KQ087367:455950-456781|KQ087358:2340201-2341169|KQ087359:1491741-1492919|KQ087367:1199056-1200381|KQ087360:997178-998173|KQ087362:1157172-1159141|KQ087365:2099302-2100451|KQ087373:518820-520652|KQ087369:810603-811408|KQ087367:1556227-1558387|KQ087363:2651104-2652417|KQ087367:276751-277801|KQ087362:1249785-1252401|KQ087369:421…	http://amigo.geneontology.org/cgi-bin/amigo/term_details?term=GO:0005975
glucan catabolic process	Gene Ontology	GO:0009251	6	23	0.000314836	0.0206217	KQ087359:1491741-1492919|KQ087360:997178-998173|KQ087365:2099302-2100451|KQ087360:1043593-1045552|KQ087367:276751-277801|KQ087358:988176-989169	http://amigo.geneontology.org/cgi-bin/amigo/term_details?term=GO:0009251
cellulase activity	Gene Ontology	GO:0008810	5	15	0.000398276	0.0240069	KQ087360:997178-998173|KQ087365:2099302-2100451|KQ087367:276751-277801|KQ087358:988176-989169|KQ087359:1491741-1492919	http://amigo.geneontology.org/cgi-bin/amigo/term_details?term=GO:0008810
oxidation-reduction process	Gene Ontology	GO:0055114	37	589	0.000412333	0.0240069	KQ087373:1095640-1096498|KQ087358:1033352-1034924|KQ087363:1452640-1453806|KQ087370:220220-222513|KQ087369:843849-845735|KQ087370:82247-83719|KQ087373:643298-644630|KQ087365:557223-558575|KQ087367:1199056-1200381|KQ087369:814467-815786|KQ087367:1550147-1551296|KQ087363:999702-1001317|KQ087362:1157172-1159141|KQ087363:2611182-2612288|KQ087362:1972584-1974621|KQ087359:153798-155487|KQ087362:3076957…	http://amigo.geneontology.org/cgi-bin/amigo/term_details?term=GO:0055114
polysaccharide metabolic process	Gene Ontology	GO:0005976	12	123	0.00171935	0.0909348	KQ087360:997178-998173|KQ087367:276751-277801|KQ087365:2099302-2100451|KQ087360:999535-1000354|KQ087360:1043593-1045552|KQ087369:810603-811408|KQ087367:1556227-1558387|KQ087363:2651104-2652417|KQ087359:1491741-1492919|KQ087367:455950-456781|KQ087369:421874-423161|KQ087358:988176-989169	http://amigo.geneontology.org/cgi-bin/amigo/term_details?term=GO:0005976
alpha-glucosidase activity	Gene Ontology	GO:0090599	3	5	0.00178298	0.0909348	KQ087371:205036-207990|KQ087369:804966-806718|KQ087367:218267-220072	http://amigo.geneontology.org/cgi-bin/amigo/term_details?term=GO:0090599
cofactor binding	Gene Ontology	GO:0048037	20	274	0.00183219	0.0909348	KQ087365:557223-558575|KQ087358:1013167-1014595|KQ087374:65712-68033|KQ087370:75797-77440|KQ087362:3076957-3078700|KQ087359:266432-269058|KQ087363:575562-576797|KQ087363:2562131-2563844|KQ087362:1972584-1974621|KQ087367:423921-426010|KQ087362:1157172-1159141|KQ087358:1035226-1036289|KQ087370:100752-101595|KQ087367:1761164-1762469|KQ087358:774516-776073|KQ087369:843849-845735|KQ087367:1199056-1200…	http://amigo.geneontology.org/cgi-bin/amigo/term_details?term=GO:0048037
sulfur compound biosynthetic process	Gene Ontology	GO:0044272	7	47	0.00190894	0.0909348	KQ087358:1013167-1014595|KQ087358:1010971-1012453|KQ087358:1029916-1031545|KQ087358:1035226-1036289|KQ087358:1028456-1029328|KQ087358:1016612-1023117|KQ087363:575562-576797	http://amigo.geneontology.org/cgi-bin/amigo/term_details?term=GO:0044272
coenzyme binding	Gene Ontology	GO:0050662	15	180	0.00208003	0.0931768	KQ087362:1157172-1159141|KQ087374:65712-68033|KQ087362:3076957-3078700|KQ087359:266432-269058|KQ087363:575562-576797|KQ087363:2562131-2563844|KQ087362:1972584-1974621|KQ087358:1035226-1036289|KQ087370:100752-101595|KQ087367:1761164-1762469|KQ087358:774516-776073|KQ087369:843849-845735|KQ087367:1199056-1200381|KQ087364:55149-56373|KQ087370:75797-77440	http://amigo.geneontology.org/cgi-bin/amigo/term_details?term=GO:0050662
antioxidant activity	Gene Ontology	GO:0016209	6	35	0.00213382	0.0931768	KQ087376:132644-133020|KQ087359:31525-33642|KQ087373:434260-436619|KQ087363:94563-96186|KQ087365:2385862-2391569|KQ087368:347994-348672	http://amigo.geneontology.org/cgi-bin/amigo/term_details?term=GO:0016209
peroxidase activity	Gene Ontology	GO:0004601	5	24	0.00238867	0.100133	KQ087373:434260-436619|KQ087365:2385862-2391569|KQ087368:347994-348672|KQ087359:31525-33642|KQ087363:94563-96186	http://amigo.geneontology.org/cgi-bin/amigo/term_details?term=GO:0004601
carbon-oxygen lyase activity, acting on polysaccharides	Gene Ontology	GO:0016837	4	14	0.00250505	0.100973	KQ087363:2651104-2652417|KQ087369:421874-423161|KQ087369:810603-811408|KQ087367:455950-456781	http://amigo.geneontology.org/cgi-bin/amigo/term_details?term=GO:0016837
carbon-carbon lyase activity	Gene Ontology	GO:0016830	6	39	0.00346002	0.129504	KQ087358:1680543-1681945|KQ087367:423921-426010|KQ087364:76654-79093|KQ087362:1249785-1252401|KQ087368:22419-24214|KQ087365:2256748-2257824	http://amigo.geneontology.org/cgi-bin/amigo/term_details?term=GO:0016830
oxidoreductase activity, acting on peroxide as acceptor	Gene Ontology	GO:0016684	5	27	0.0037349	0.134972	KQ087373:434260-436619|KQ087365:2385862-2391569|KQ087368:347994-348672|KQ087359:31525-33642|KQ087363:94563-96186	http://amigo.geneontology.org/cgi-bin/amigo/term_details?term=GO:0016684
transferase activity, transferring acyl groups	Gene Ontology	GO:0016746	13	158	0.00446478	0.150938	KQ087363:999702-1001317|KQ087363:2611182-2612288|KQ087362:3048195-3048903|KQ087359:213548-214722|KQ087373:1160141-1161146|KQ087373:518820-520652|KQ087363:9602-10755|KQ087363:1452640-1453806|KQ087362:3072518-3074048|KQ087367:1550147-1551296|KQ087363:257005-257998|KQ087367:1546502-1547612|KQ087369:407772-408867	http://amigo.geneontology.org/cgi-bin/amigo/term_details?term=GO:0016746
carbon-oxygen lyase activity	Gene Ontology	GO:0016835	7	58	0.00550705	0.179178	KQ087361:486265-487081|KQ087369:810603-811408|KQ087367:455950-456781|KQ087363:2562131-2563844|KQ087363:2651104-2652417|KQ087369:421874-423161|KQ087360:1268336-1269852	http://amigo.geneontology.org/cgi-bin/amigo/term_details?term=GO:0016835
transferase activity, transferring acyl groups other than amino-acyl groups	Gene Ontology	GO:0016747	12	144	0.00564207	0.179178	KQ087363:999702-1001317|KQ087363:2611182-2612288|KQ087362:3048195-3048903|KQ087359:213548-214722|KQ087373:1160141-1161146|KQ087363:9602-10755|KQ087363:1452640-1453806|KQ087362:3072518-3074048|KQ087367:1550147-1551296|KQ087363:257005-257998|KQ087367:1546502-1547612|KQ087369:407772-408867	http://amigo.geneontology.org/cgi-bin/amigo/term_details?term=GO:0016747
pectin catabolic process	Gene Ontology	GO:0045490	4	19	0.006363	0.180228	KQ087363:2651104-2652417|KQ087369:421874-423161|KQ087369:810603-811408|KQ087367:455950-456781	http://amigo.geneontology.org/cgi-bin/amigo/term_details?term=GO:0045490
pectin metabolic process	Gene Ontology	GO:0045488	4	19	0.006363	0.180228	KQ087363:2651104-2652417|KQ087369:421874-423161|KQ087369:810603-811408|KQ087367:455950-456781	http://amigo.geneontology.org/cgi-bin/amigo/term_details?term=GO:0045488
galacturonan metabolic process	Gene Ontology	GO:0010393	4	19	0.006363	0.180228	KQ087363:2651104-2652417|KQ087369:421874-423161|KQ087369:810603-811408|KQ087367:455950-456781	http://amigo.geneontology.org/cgi-bin/amigo/term_details?term=GO:0010393
sulfur compound metabolic process	Gene Ontology	GO:0006790	9	94	0.00704415	0.19427	KQ087367:547555-549291|KQ087376:132644-133020|KQ087358:1013167-1014595|KQ087358:1010971-1012453|KQ087358:1029916-1031545|KQ087358:1035226-1036289|KQ087358:1028456-1029328|KQ087358:1016612-1023117|KQ087363:575562-576797	http://amigo.geneontology.org/cgi-bin/amigo/term_details?term=GO:0006790
metabolic process	Gene Ontology	GO:0008152	129	3127	0.00749646	0.201443	KQ087358:1680543-1681945|KQ087360:2861308-2862665|KQ087368:424746-426537|KQ087358:1033352-1034924|KQ087359:31525-33642|KQ087364:854832-858221|KQ087370:28124-30599|KQ087359:2263883-2266350|KQ087360:1268336-1269852|KQ087368:340286-340813|KQ087363:2611182-2612288|KQ087365:2099302-2100451|KQ087362:3076957-3078700|KQ087370:100752-101595|KQ087367:1556227-1558387|KQ087363:575562-576797|KQ087367:266419-2…	http://amigo.geneontology.org/cgi-bin/amigo/term_details?term=GO:0008152
disaccharide catabolic process	Gene Ontology	GO:0046352	3	10	0.00805002	0.205766	KQ087367:218267-220072|KQ087369:804966-806718|KQ087364:854832-858221	http://amigo.geneontology.org/cgi-bin/amigo/term_details?term=GO:0046352
oligosaccharide catabolic process	Gene Ontology	GO:0009313	3	10	0.00805002	0.205766	KQ087367:218267-220072|KQ087369:804966-806718|KQ087364:854832-858221	http://amigo.geneontology.org/cgi-bin/amigo/term_details?term=GO:0009313
response to oxygen-containing compound	Gene Ontology	GO:1901700	6	48	0.00856046	0.210331	KQ087367:547555-549291|KQ087374:229954-230815|KQ087376:132644-133020|KQ087365:2159709-2160555|KQ087364:854832-858221|KQ087373:434260-436619	http://amigo.geneontology.org/cgi-bin/amigo/term_details?term=GO:1901700
pyruvate metabolic process	Gene Ontology	GO:0006090	4	21	0.00862998	0.210331	KQ087359:2263883-2266350|KQ087362:1157172-1159141|KQ087363:1452640-1453806|KQ087373:896451-898001	http://amigo.geneontology.org/cgi-bin/amigo/term_details?term=GO:0006090
flavin adenine dinucleotide binding	Gene Ontology	GO:0050660	9	101	0.0106677	0.254086	KQ087374:65712-68033|KQ087362:3076957-3078700|KQ087359:266432-269058|KQ087363:2562131-2563844|KQ087362:1972584-1974621|KQ087369:843849-845735|KQ087358:1035226-1036289|KQ087364:55149-56373|KQ087370:75797-77440	http://amigo.geneontology.org/cgi-bin/amigo/term_details?term=GO:0050660
catabolic process	Gene Ontology	GO:0009056	25	439	0.0112922	0.259001	KQ087360:999535-1000354|KQ087363:1452640-1453806|KQ087364:854832-858221|KQ087359:1491741-1492919|KQ087367:1442764-1444280|KQ087360:1268336-1269852|KQ087360:997178-998173|KQ087365:2099302-2100451|KQ087373:518820-520652|KQ087369:810603-811408|KQ087363:2651104-2652417|KQ087367:276751-277801|KQ087369:421874-423161|KQ087358:988176-989169|KQ087363:272557-274522|KQ087371:205036-207990|KQ087367:218267-22…	http://amigo.geneontology.org/cgi-bin/amigo/term_details?term=GO:0009056
cellular response to reactive oxygen species	Gene Ontology	GO:0034614	4	23	0.0113683	0.259001	KQ087373:434260-436619|KQ087374:229954-230815|KQ087376:132644-133020|KQ087365:2159709-2160555	http://amigo.geneontology.org/cgi-bin/amigo/term_details?term=GO:0034614
cellular response to oxygen-containing compound	Gene Ontology	GO:1901701	5	37	0.0120577	0.261547	KQ087373:434260-436619|KQ087374:229954-230815|KQ087376:132644-133020|KQ087365:2159709-2160555|KQ087364:854832-858221	http://amigo.geneontology.org/cgi-bin/amigo/term_details?term=GO:1901701
acetate metabolic process	Gene Ontology	GO:0006083	3	12	0.0121944	0.261547	KQ087367:547555-549291|KQ087373:518820-520652|KQ087368:22419-24214	http://amigo.geneontology.org/cgi-bin/amigo/term_details?term=GO:0006083
monocarboxylic acid metabolic process	Gene Ontology	GO:0032787	10	122	0.0122288	0.261547	KQ087367:547555-549291|KQ087362:1157172-1159141|KQ087373:1095640-1096498|KQ087373:518820-520652|KQ087363:1452640-1453806|KQ087363:2562131-2563844|KQ087373:896451-898001|KQ087359:2263883-2266350|KQ087368:22419-24214|KQ087360:1268336-1269852	http://amigo.geneontology.org/cgi-bin/amigo/term_details?term=GO:0032787
positive regulation of secondary metabolite biosynthetic process	Gene Ontology	GO:1900378	4	25	0.0146103	0.288898	KQ087368:348761-349952|KQ087370:28124-30599|KQ087358:1010971-1012453|KQ087368:351403-352769	http://amigo.geneontology.org/cgi-bin/amigo/term_details?term=GO:1900378
response to reactive oxygen species	Gene Ontology	GO:0000302	4	25	0.0146103	0.288898	KQ087373:434260-436619|KQ087374:229954-230815|KQ087376:132644-133020|KQ087365:2159709-2160555	http://amigo.geneontology.org/cgi-bin/amigo/term_details?term=GO:0000302
cell redox homeostasis	Gene Ontology	GO:0045454	4	26	0.0164288	0.308291	KQ087365:557223-558575|KQ087366:1682756-1683611|KQ087362:3076957-3078700|KQ087376:132644-133020	http://amigo.geneontology.org/cgi-bin/amigo/term_details?term=GO:0045454
hydrolase activity, hydrolyzing O-glycosyl compounds	Gene Ontology	GO:0004553	12	168	0.0165507	0.308291	KQ087360:997178-998173|KQ087367:218267-220072|KQ087367:276751-277801|KQ087365:2099302-2100451|KQ087369:804966-806718|KQ087360:1043593-1045552|KQ087364:854832-858221|KQ087358:2340201-2341169|KQ087371:205036-207990|KQ087359:1491741-1492919|KQ087367:1556227-1558387|KQ087358:988176-989169	http://amigo.geneontology.org/cgi-bin/amigo/term_details?term=GO:0004553
cellular response to hydrogen peroxide	Gene Ontology	GO:0070301	3	14	0.0173561	0.308291	KQ087373:434260-436619|KQ087374:229954-230815|KQ087365:2159709-2160555	http://amigo.geneontology.org/cgi-bin/amigo/term_details?term=GO:0070301
purine ribonucleoside diphosphate metabolic process	Gene Ontology	GO:0009179	3	14	0.0173561	0.308291	KQ087362:1157172-1159141|KQ087363:1452640-1453806|KQ087373:896451-898001	http://amigo.geneontology.org/cgi-bin/amigo/term_details?term=GO:0009179
purine nucleoside diphosphate metabolic process	Gene Ontology	GO:0009135	3	14	0.0173561	0.308291	KQ087362:1157172-1159141|KQ087363:1452640-1453806|KQ087373:896451-898001	http://amigo.geneontology.org/cgi-bin/amigo/term_details?term=GO:0009135
ADP metabolic process	Gene Ontology	GO:0046031	3	14	0.0173561	0.308291	KQ087362:1157172-1159141|KQ087363:1452640-1453806|KQ087373:896451-898001	http://amigo.geneontology.org/cgi-bin/amigo/term_details?term=GO:0046031
glucan metabolic process	Gene Ontology	GO:0044042	6	59	0.0202598	0.317219	KQ087359:1491741-1492919|KQ087360:997178-998173|KQ087365:2099302-2100451|KQ087360:1043593-1045552|KQ087367:276751-277801|KQ087358:988176-989169	http://amigo.geneontology.org/cgi-bin/amigo/term_details?term=GO:0044042
response to hydrogen peroxide	Gene Ontology	GO:0042542	3	15	0.0203263	0.317219	KQ087373:434260-436619|KQ087374:229954-230815|KQ087365:2159709-2160555	http://amigo.geneontology.org/cgi-bin/amigo/term_details?term=GO:0042542
glucose metabolic process	Gene Ontology	GO:0006006	4	28	0.0204757	0.317219	KQ087367:1199056-1200381|KQ087362:1157172-1159141|KQ087363:1452640-1453806|KQ087373:896451-898001	http://amigo.geneontology.org/cgi-bin/amigo/term_details?term=GO:0006006
catalase activity	Gene Ontology	GO:0004096	2	5	0.0205829	0.317219	KQ087373:434260-436619|KQ087359:31525-33642	http://amigo.geneontology.org/cgi-bin/amigo/term_details?term=GO:0004096
ethanol biosynthetic process	Gene Ontology	GO:0006115	2	5	0.0205829	0.317219	KQ087362:1157172-1159141|KQ087363:1452640-1453806	http://amigo.geneontology.org/cgi-bin/amigo/term_details?term=GO:0006115
peroxisomal matrix	Gene Ontology	GO:0005782	2	5	0.0205829	0.317219	KQ087373:518820-520652|KQ087368:22419-24214	http://amigo.geneontology.org/cgi-bin/amigo/term_details?term=GO:0005782
sucrose metabolic process	Gene Ontology	GO:0005985	2	5	0.0205829	0.317219	KQ087369:804966-806718|KQ087367:218267-220072	http://amigo.geneontology.org/cgi-bin/amigo/term_details?term=GO:0005985
sequestering of metal ion	Gene Ontology	GO:0051238	2	5	0.0205829	0.317219	KQ087375:1054635-1057874|KQ087375:1083141-1084855	http://amigo.geneontology.org/cgi-bin/amigo/term_details?term=GO:0051238
microbody lumen	Gene Ontology	GO:0031907	2	5	0.0205829	0.317219	KQ087373:518820-520652|KQ087368:22419-24214	http://amigo.geneontology.org/cgi-bin/amigo/term_details?term=GO:0031907
hydrolase activity, acting on glycosyl bonds	Gene Ontology	GO:0016798	12	175	0.0216556	0.328913	KQ087360:997178-998173|KQ087367:218267-220072|KQ087367:276751-277801|KQ087365:2099302-2100451|KQ087369:804966-806718|KQ087360:1043593-1045552|KQ087364:854832-858221|KQ087358:2340201-2341169|KQ087371:205036-207990|KQ087359:1491741-1492919|KQ087367:1556227-1558387|KQ087358:988176-989169	http://amigo.geneontology.org/cgi-bin/amigo/term_details?term=GO:0016798
organic substance catabolic process	Gene Ontology	GO:1901575	23	422	0.0229119	0.343024	KQ087360:999535-1000354|KQ087363:1452640-1453806|KQ087364:854832-858221|KQ087359:1491741-1492919|KQ087360:1268336-1269852|KQ087360:997178-998173|KQ087365:2099302-2100451|KQ087373:518820-520652|KQ087369:810603-811408|KQ087363:2651104-2652417|KQ087367:276751-277801|KQ087375:702699-704464|KQ087358:988176-989169|KQ087363:272557-274522|KQ087371:205036-207990|KQ087367:218267-220072|KQ087367:455950-4567…	http://amigo.geneontology.org/cgi-bin/amigo/term_details?term=GO:1901575
ribonucleoside diphosphate metabolic process	Gene Ontology	GO:0009185	3	16	0.0235579	0.347727	KQ087362:1157172-1159141|KQ087363:1452640-1453806|KQ087373:896451-898001	http://amigo.geneontology.org/cgi-bin/amigo/term_details?term=GO:0009185
extracellular region	Gene Ontology	GO:0005576	14	221	0.0245274	0.35701	KQ087375:1026593-1028945|KQ087367:276751-277801|KQ087365:2099302-2100451|KQ087369:810603-811408|KQ087364:854832-858221|KQ087363:2651104-2652417|KQ087358:1035226-1036289|KQ087358:988176-989169|KQ087373:896451-898001|KQ087363:2339527-2340304|KQ087367:1199056-1200381|KQ087367:455950-456781|KQ087369:421874-423161|KQ087369:804966-806718	http://amigo.geneontology.org/cgi-bin/amigo/term_details?term=GO:0005576
oxo-acid-lyase activity	Gene Ontology	GO:0016833	2	6	0.0268496	0.373016	KQ087358:1680543-1681945|KQ087368:22419-24214	http://amigo.geneontology.org/cgi-bin/amigo/term_details?term=GO:0016833
thiamine pyrophosphate binding	Gene Ontology	GO:0030976	2	6	0.0268496	0.373016	KQ087362:1157172-1159141|KQ087363:575562-576797	http://amigo.geneontology.org/cgi-bin/amigo/term_details?term=GO:0030976
cellulose binding	Gene Ontology	GO:0030248	3	17	0.0270508	0.373016	KQ087365:2099302-2100451|KQ087358:988176-989169|KQ087367:276751-277801	http://amigo.geneontology.org/cgi-bin/amigo/term_details?term=GO:0030248
single-organism carbohydrate metabolic process	Gene Ontology	GO:0044723	12	182	0.0278451	0.378982	KQ087362:1157172-1159141|KQ087359:225790-227494|KQ087367:307111-310254|KQ087373:518820-520652|KQ087363:1452640-1453806|KQ087364:854832-858221|KQ087358:1712792-1714043|KQ087369:804966-806718|KQ087373:896451-898001|KQ087367:1199056-1200381|KQ087368:22419-24214|KQ087367:218267-220072	http://amigo.geneontology.org/cgi-bin/amigo/term_details?term=GO:0044723
nucleoside diphosphate metabolic process	Gene Ontology	GO:0009132	3	18	0.0308042	0.413882	KQ087362:1157172-1159141|KQ087363:1452640-1453806|KQ087373:896451-898001	http://amigo.geneontology.org/cgi-bin/amigo/term_details?term=GO:0009132
glyoxysome	Gene Ontology	GO:0009514	4	33	0.0330838	0.438884	KQ087367:547555-549291|KQ087373:518820-520652|KQ087368:22419-24214|KQ087375:23302-23890	http://amigo.geneontology.org/cgi-bin/amigo/term_details?term=GO:0009514
cellular response to alcohol	Gene Ontology	GO:0097306	2	7	0.0337754	0.442458	KQ087365:2159709-2160555|KQ087364:854832-858221	http://amigo.geneontology.org/cgi-bin/amigo/term_details?term=GO:0097306
cellular carbohydrate metabolic process	Gene Ontology	GO:0044262	10	146	0.0345329	0.443962	KQ087359:225790-227494|KQ087373:518820-520652|KQ087364:854832-858221|KQ087359:2266552-2267534|KQ087358:1712792-1714043|KQ087371:205036-207990|KQ087369:804966-806718|KQ087373:896451-898001|KQ087368:22419-24214|KQ087367:218267-220072	http://amigo.geneontology.org/cgi-bin/amigo/term_details?term=GO:0044262
glucosidase activity	Gene Ontology	GO:0015926	3	19	0.0348162	0.443962	KQ087371:205036-207990|KQ087369:804966-806718|KQ087367:218267-220072	http://amigo.geneontology.org/cgi-bin/amigo/term_details?term=GO:0015926
organic hydroxy compound biosynthetic process	Gene Ontology	GO:1901617	8	106	0.0353886	0.443962	KQ087362:1157172-1159141|KQ087359:225790-227494|KQ087363:1452640-1453806|KQ087360:171314-172508|KQ087368:348761-349952|KQ087368:410167-412357|KQ087368:346783-347575|KQ087368:351403-352769	http://amigo.geneontology.org/cgi-bin/amigo/term_details?term=GO:1901617
fatty acid metabolic process	Gene Ontology	GO:0006631	6	68	0.0355847	0.443962	KQ087367:547555-549291|KQ087373:1095640-1096498|KQ087373:518820-520652|KQ087363:2562131-2563844|KQ087368:22419-24214|KQ087360:1268336-1269852	http://amigo.geneontology.org/cgi-bin/amigo/term_details?term=GO:0006631
organic heteropentacyclic compound metabolic process	Gene Ontology	GO:1901376	5	51	0.0373187	0.454767	KQ087370:82247-83719|KQ087360:171314-172508|KQ087368:348761-349952|KQ087365:2159709-2160555|KQ087368:351403-352769	http://amigo.geneontology.org/cgi-bin/amigo/term_details?term=GO:1901376
organic heteropentacyclic compound biosynthetic process	Gene Ontology	GO:1901378	5	51	0.0373187	0.454767	KQ087370:82247-83719|KQ087360:171314-172508|KQ087368:348761-349952|KQ087365:2159709-2160555|KQ087368:351403-352769	http://amigo.geneontology.org/cgi-bin/amigo/term_details?term=GO:1901378
FAD binding	Gene Ontology	GO:0071949	4	35	0.0391528	0.456978	KQ087363:2562131-2563844|KQ087374:65712-68033|KQ087364:55149-56373|KQ087370:75797-77440	http://amigo.geneontology.org/cgi-bin/amigo/term_details?term=GO:0071949
acetate catabolic process	Gene Ontology	GO:0045733	2	8	0.0413102	0.456978	KQ087373:518820-520652|KQ087368:22419-24214	http://amigo.geneontology.org/cgi-bin/amigo/term_details?term=GO:0045733
maltose metabolic process	Gene Ontology	GO:0000023	2	8	0.0413102	0.456978	KQ087369:804966-806718|KQ087367:218267-220072	http://amigo.geneontology.org/cgi-bin/amigo/term_details?term=GO:0000023
response to alcohol	Gene Ontology	GO:0097305	2	8	0.0413102	0.456978	KQ087365:2159709-2160555|KQ087364:854832-858221	http://amigo.geneontology.org/cgi-bin/amigo/term_details?term=GO:0097305
short-chain fatty acid metabolic process	Gene Ontology	GO:0046459	2	8	0.0413102	0.456978	KQ087367:547555-549291|KQ087360:1268336-1269852	http://amigo.geneontology.org/cgi-bin/amigo/term_details?term=GO:0046459
carboxylic acid metabolic process	Gene Ontology	GO:0019752	16	285	0.0423944	0.456978	KQ087367:547555-549291|KQ087376:132644-133020|KQ087373:1095640-1096498|KQ087373:518820-520652|KQ087367:423921-426010|KQ087375:702699-704464|KQ087363:1452640-1453806|KQ087363:2562131-2563844|KQ087359:2266552-2267534|KQ087362:1157172-1159141|KQ087373:896451-898001|KQ087359:2263883-2266350|KQ087369:836595-837678|KQ087368:22419-24214|KQ087359:110471-111555|KQ087360:1268336-1269852	http://amigo.geneontology.org/cgi-bin/amigo/term_details?term=GO:0019752
serine hydrolase activity	Gene Ontology	GO:0017171	4	36	0.0424098	0.456978	KQ087375:1026593-1028945|KQ087360:2488577-2491201|KQ087374:219550-220229|KQ087365:1666693-1668551	http://amigo.geneontology.org/cgi-bin/amigo/term_details?term=GO:0017171
serine-type peptidase activity	Gene Ontology	GO:0008236	4	36	0.0424098	0.456978	KQ087375:1026593-1028945|KQ087360:2488577-2491201|KQ087374:219550-220229|KQ087365:1666693-1668551	http://amigo.geneontology.org/cgi-bin/amigo/term_details?term=GO:0008236
fatty acid catabolic process	Gene Ontology	GO:0009062	3	21	0.0436048	0.456978	KQ087373:518820-520652|KQ087368:22419-24214|KQ087360:1268336-1269852	http://amigo.geneontology.org/cgi-bin/amigo/term_details?term=GO:0009062
pattern binding	Gene Ontology	GO:0001871	3	21	0.0436048	0.456978	KQ087365:2099302-2100451|KQ087358:988176-989169|KQ087367:276751-277801	http://amigo.geneontology.org/cgi-bin/amigo/term_details?term=GO:0001871
polysaccharide binding	Gene Ontology	GO:0030247	3	21	0.0436048	0.456978	KQ087365:2099302-2100451|KQ087358:988176-989169|KQ087367:276751-277801	http://amigo.geneontology.org/cgi-bin/amigo/term_details?term=GO:0030247
cellular lipid catabolic process	Gene Ontology	GO:0044242	4	37	0.0458151	0.475388	KQ087363:272557-274522|KQ087373:518820-520652|KQ087368:22419-24214|KQ087360:1268336-1269852	http://amigo.geneontology.org/cgi-bin/amigo/term_details?term=GO:0044242
monodictyphenone metabolic process	Gene Ontology	GO:1900813	3	22	0.0483741	0.492195	KQ087368:348761-349952|KQ087368:346783-347575|KQ087368:351403-352769	http://amigo.geneontology.org/cgi-bin/amigo/term_details?term=GO:1900813
monodictyphenone biosynthetic process	Gene Ontology	GO:1900815	3	22	0.0483741	0.492195	KQ087368:348761-349952|KQ087368:346783-347575|KQ087368:351403-352769	http://amigo.geneontology.org/cgi-bin/amigo/term_details?term=GO:1900815
aldehyde-lyase activity	Gene Ontology	GO:0016832	2	9	0.0494061	0.497862	KQ087362:1249785-1252401|KQ087364:76654-79093	http://amigo.geneontology.org/cgi-bin/amigo/term_details?term=GO:0016832
response to inorganic substance	Gene Ontology	GO:0010035	5	56	0.0509532	0.508561	KQ087373:434260-436619|KQ087374:229954-230815|KQ087368:347994-348672|KQ087365:2159709-2160555|KQ087364:854832-858221	http://amigo.geneontology.org/cgi-bin/amigo/term_details?term=GO:0010035
oxoacid metabolic process	Gene Ontology	GO:0043436	16	295	0.0540597	0.534477	KQ087367:547555-549291|KQ087376:132644-133020|KQ087373:1095640-1096498|KQ087373:518820-520652|KQ087367:423921-426010|KQ087375:702699-704464|KQ087363:1452640-1453806|KQ087363:2562131-2563844|KQ087359:2266552-2267534|KQ087362:1157172-1159141|KQ087373:896451-898001|KQ087359:2263883-2266350|KQ087369:836595-837678|KQ087368:22419-24214|KQ087359:110471-111555|KQ087360:1268336-1269852	http://amigo.geneontology.org/cgi-bin/amigo/term_details?term=GO:0043436
nicotinamide nucleotide metabolic process	Gene Ontology	GO:0046496	4	40	0.0569172	0.542266	KQ087358:774516-776073|KQ087362:1157172-1159141|KQ087363:1452640-1453806|KQ087373:896451-898001	http://amigo.geneontology.org/cgi-bin/amigo/term_details?term=GO:0046496
hexose metabolic process	Gene Ontology	GO:0019318	4	40	0.0569172	0.542266	KQ087367:1199056-1200381|KQ087362:1157172-1159141|KQ087363:1452640-1453806|KQ087373:896451-898001	http://amigo.geneontology.org/cgi-bin/amigo/term_details?term=GO:0019318
pyridine nucleotide metabolic process	Gene Ontology	GO:0019362	4	40	0.0569172	0.542266	KQ087358:774516-776073|KQ087362:1157172-1159141|KQ087363:1452640-1453806|KQ087373:896451-898001	http://amigo.geneontology.org/cgi-bin/amigo/term_details?term=GO:0019362
lipid catabolic process	Gene Ontology	GO:0016042	4	40	0.0569172	0.542266	KQ087363:272557-274522|KQ087373:518820-520652|KQ087368:22419-24214|KQ087360:1268336-1269852	http://amigo.geneontology.org/cgi-bin/amigo/term_details?term=GO:0016042
ethanol metabolic process	Gene Ontology	GO:0006067	2	10	0.0580181	0.547775	KQ087362:1157172-1159141|KQ087363:1452640-1453806	http://amigo.geneontology.org/cgi-bin/amigo/term_details?term=GO:0006067
cellular carbohydrate catabolic process	Gene Ontology	GO:0044275	4	41	0.0609108	0.564907	KQ087367:218267-220072|KQ087371:205036-207990|KQ087369:804966-806718|KQ087364:854832-858221	http://amigo.geneontology.org/cgi-bin/amigo/term_details?term=GO:0044275
single-organism carbohydrate catabolic process	Gene Ontology	GO:0044724	4	41	0.0609108	0.564907	KQ087367:218267-220072|KQ087369:804966-806718|KQ087373:896451-898001|KQ087364:854832-858221	http://amigo.geneontology.org/cgi-bin/amigo/term_details?term=GO:0044724
maintenance of location	Gene Ontology	GO:0051235	3	25	0.0641257	0.58266	KQ087375:1054635-1057874|KQ087368:347994-348672|KQ087375:1083141-1084855	http://amigo.geneontology.org/cgi-bin/amigo/term_details?term=GO:0051235
response to oxidative stress	Gene Ontology	GO:0006979	7	100	0.0644944	0.58266	KQ087374:229954-230815|KQ087376:132644-133020|KQ087365:2159709-2160555|KQ087359:31525-33642|KQ087373:434260-436619|KQ087365:2385862-2391569|KQ087375:702699-704464	http://amigo.geneontology.org/cgi-bin/amigo/term_details?term=GO:0006979
regulation of secondary metabolite biosynthetic process	Gene Ontology	GO:1900376	4	42	0.0650489	0.58266	KQ087368:348761-349952|KQ087370:28124-30599|KQ087358:1010971-1012453|KQ087368:351403-352769	http://amigo.geneontology.org/cgi-bin/amigo/term_details?term=GO:1900376
phenol-containing compound biosynthetic process	Gene Ontology	GO:0046189	4	42	0.0650489	0.58266	KQ087360:171314-172508|KQ087368:348761-349952|KQ087368:346783-347575|KQ087368:351403-352769	http://amigo.geneontology.org/cgi-bin/amigo/term_details?term=GO:0046189
organic hydroxy compound metabolic process	Gene Ontology	GO:1901615	9	143	0.0656552	0.583107	KQ087362:1157172-1159141|KQ087359:225790-227494|KQ087363:1452640-1453806|KQ087360:171314-172508|KQ087368:348761-349952|KQ087368:410167-412357|KQ087358:1712792-1714043|KQ087368:346783-347575|KQ087368:351403-352769	http://amigo.geneontology.org/cgi-bin/amigo/term_details?term=GO:1901615
transporter activity	Gene Ontology	GO:0005215	17	328	0.0664433	0.585147	KQ087367:1577327-1579154|KQ087373:622241-624593|KQ087373:980127-981877|KQ087375:1054635-1057874|KQ087370:368885-370011|KQ087359:1411400-1413175|KQ087373:607970-610066|KQ087360:2390040-2391787|KQ087373:541958-546058|KQ087369:796405-798362|KQ087365:2085944-2087615|KQ087375:1083141-1084855|KQ087360:2538058-2539986|KQ087363:68341-70378|KQ087365:1684405-1685465|KQ087363:141459-146109|KQ087373:480236-4…	http://amigo.geneontology.org/cgi-bin/amigo/term_details?term=GO:0005215
regulation of ketone biosynthetic process	Gene Ontology	GO:0010566	2	11	0.0671032	0.586035	KQ087368:348761-349952|KQ087368:351403-352769	http://amigo.geneontology.org/cgi-bin/amigo/term_details?term=GO:0010566
single-organism process	Gene Ontology	GO:0044699	90	2274	0.0722815	0.62091	KQ087358:1680543-1681945|KQ087368:424746-426537|KQ087358:1033352-1034924|KQ087359:31525-33642|KQ087364:854832-858221|KQ087370:28124-30599|KQ087359:2263883-2266350|KQ087360:1268336-1269852|KQ087373:622241-624593|KQ087363:2611182-2612288|KQ087362:3076957-3078700|KQ087363:575562-576797|KQ087365:2159709-2160555|KQ087366:1682756-1683611|KQ087368:340286-340813|KQ087370:75797-77440|KQ087373:1160141-1161…	http://amigo.geneontology.org/cgi-bin/amigo/term_details?term=GO:0044699
single-organism catabolic process	Gene Ontology	GO:0044712	11	192	0.0746713	0.636224	KQ087363:272557-274522|KQ087373:518820-520652|KQ087363:1452640-1453806|KQ087364:854832-858221|KQ087367:218267-220072|KQ087369:804966-806718|KQ087373:896451-898001|KQ087367:1442764-1444280|KQ087368:22419-24214|KQ087375:702699-704464|KQ087360:1268336-1269852	http://amigo.geneontology.org/cgi-bin/amigo/term_details?term=GO:0044712
single-organism biosynthetic process	Gene Ontology	GO:0044711	27	584	0.0764179	0.641207	KQ087373:1095640-1096498|KQ087358:1010971-1012453|KQ087358:1033352-1034924|KQ087363:1452640-1453806|KQ087368:348761-349952|KQ087370:82247-83719|KQ087370:28124-30599|KQ087368:410167-412357|KQ087362:1157172-1159141|KQ087358:1013167-1014595|KQ087368:360409-362046|KQ087363:575562-576797|KQ087368:351403-352769|KQ087365:2159709-2160555|KQ087359:225790-227494|KQ087358:1029916-1031545|KQ087360:171314-172…	http://amigo.geneontology.org/cgi-bin/amigo/term_details?term=GO:0044711
regulation of secondary metabolic process	Gene Ontology	GO:0043455	4	45	0.0783153	0.641207	KQ087368:348761-349952|KQ087370:28124-30599|KQ087358:1010971-1012453|KQ087368:351403-352769	http://amigo.geneontology.org/cgi-bin/amigo/term_details?term=GO:0043455
carbohydrate binding	Gene Ontology	GO:0030246	4	45	0.0783153	0.641207	KQ087365:2099302-2100451|KQ087358:988176-989169|KQ087373:896451-898001|KQ087367:276751-277801	http://amigo.geneontology.org/cgi-bin/amigo/term_details?term=GO:0030246
pyridine-containing compound metabolic process	Gene Ontology	GO:0072524	4	45	0.0783153	0.641207	KQ087358:774516-776073|KQ087362:1157172-1159141|KQ087363:1452640-1453806|KQ087373:896451-898001	http://amigo.geneontology.org/cgi-bin/amigo/term_details?term=GO:0072524
dicarboxylic acid metabolic process	Gene Ontology	GO:0043648	3	28	0.0819225	0.665541	KQ087367:423921-426010|KQ087359:110471-111555|KQ087375:702699-704464	http://amigo.geneontology.org/cgi-bin/amigo/term_details?term=GO:0043648
transmembrane transporter activity	Gene Ontology	GO:0022857	15	292	0.0858085	0.690421	KQ087367:1577327-1579154|KQ087373:622241-624593|KQ087373:980127-981877|KQ087375:1054635-1057874|KQ087370:368885-370011|KQ087359:1411400-1413175|KQ087360:2390040-2391787|KQ087373:541958-546058|KQ087369:796405-798362|KQ087365:2085944-2087615|KQ087375:1083141-1084855|KQ087360:2538058-2539986|KQ087363:68341-70378|KQ087363:141459-146109|KQ087373:480236-483672	http://amigo.geneontology.org/cgi-bin/amigo/term_details?term=GO:0022857
glucose 6-phosphate metabolic process	Gene Ontology	GO:0051156	2	13	0.0865326	0.690421	KQ087358:774516-776073|KQ087373:896451-898001	http://amigo.geneontology.org/cgi-bin/amigo/term_details?term=GO:0051156
monosaccharide metabolic process	Gene Ontology	GO:0005996	4	47	0.0878511	0.690421	KQ087367:1199056-1200381|KQ087362:1157172-1159141|KQ087363:1452640-1453806|KQ087373:896451-898001	http://amigo.geneontology.org/cgi-bin/amigo/term_details?term=GO:0005996
vitamin binding	Gene Ontology	GO:0019842	4	47	0.0878511	0.690421	KQ087358:1016612-1023117|KQ087362:1157172-1159141|KQ087363:575562-576797|KQ087358:1003501-1007320	http://amigo.geneontology.org/cgi-bin/amigo/term_details?term=GO:0019842
disaccharide metabolic process	Gene Ontology	GO:0005984	3	29	0.088279	0.690421	KQ087367:218267-220072|KQ087369:804966-806718|KQ087364:854832-858221	http://amigo.geneontology.org/cgi-bin/amigo/term_details?term=GO:0005984
organic acid metabolic process	Gene Ontology	GO:0006082	19	392	0.089147	0.692045	KQ087367:547555-549291|KQ087376:132644-133020|KQ087373:1095640-1096498|KQ087369:836595-837678|KQ087373:518820-520652|KQ087367:423921-426010|KQ087375:702699-704464|KQ087363:1452640-1453806|KQ087363:2562131-2563844|KQ087368:346783-347575|KQ087359:2266552-2267534|KQ087362:1157172-1159141|KQ087368:348761-349952|KQ087373:896451-898001|KQ087359:2263883-2266350|KQ087368:351403-352769|KQ087368:22419-2421…	http://amigo.geneontology.org/cgi-bin/amigo/term_details?term=GO:0006082
phenol-containing compound metabolic process	Gene Ontology	GO:0018958	4	48	0.09282	0.71526	KQ087360:171314-172508|KQ087368:348761-349952|KQ087368:346783-347575|KQ087368:351403-352769	http://amigo.geneontology.org/cgi-bin/amigo/term_details?term=GO:0018958
benzene-containing compound metabolic process	Gene Ontology	GO:0042537	3	30	0.0948361	0.725461	KQ087368:348761-349952|KQ087368:346783-347575|KQ087368:351403-352769	http://amigo.geneontology.org/cgi-bin/amigo/term_details?term=GO:0042537
O-methyltransferase activity	Gene Ontology	GO:0008171	2	14	0.0968021	0.729846	KQ087368:360409-362046|KQ087359:17246-18199	http://amigo.geneontology.org/cgi-bin/amigo/term_details?term=GO:0008171
glutamate metabolic process	Gene Ontology	GO:0006536	2	14	0.0968021	0.729846	KQ087367:423921-426010|KQ087375:702699-704464	http://amigo.geneontology.org/cgi-bin/amigo/term_details?term=GO:0006536
primary alcohol biosynthetic process	Gene Ontology	GO:0034309	2	15	0.107395	0.798226	KQ087362:1157172-1159141|KQ087363:1452640-1453806	http://amigo.geneontology.org/cgi-bin/amigo/term_details?term=GO:0034309
oxidoreduction coenzyme metabolic process	Gene Ontology	GO:0006733	4	52	0.113976	0.841174	KQ087358:774516-776073|KQ087362:1157172-1159141|KQ087363:1452640-1453806|KQ087373:896451-898001	http://amigo.geneontology.org/cgi-bin/amigo/term_details?term=GO:0006733
exopeptidase activity	Gene Ontology	GO:0008238	3	33	0.115636	0.847455	KQ087375:1026593-1028945|KQ087360:2488577-2491201|KQ087365:1666693-1668551	http://amigo.geneontology.org/cgi-bin/amigo/term_details?term=GO:0008238
intramolecular transferase activity	Gene Ontology	GO:0016866	2	16	0.118279	0.860805	KQ087358:1680543-1681945|KQ087368:410167-412357	http://amigo.geneontology.org/cgi-bin/amigo/term_details?term=GO:0016866
macromolecule catabolic process	Gene Ontology	GO:0009057	12	235	0.11922	0.861672	KQ087375:1026593-1028945|KQ087360:997178-998173|KQ087367:276751-277801|KQ087365:2099302-2100451|KQ087360:999535-1000354|KQ087360:1043593-1045552|KQ087369:810603-811408|KQ087363:2651104-2652417|KQ087358:988176-989169|KQ087367:455950-456781|KQ087369:421874-423161|KQ087359:1491741-1492919	http://amigo.geneontology.org/cgi-bin/amigo/term_details?term=GO:0009057
oligosaccharide metabolic process	Gene Ontology	GO:0009311	3	35	0.130366	0.87561	KQ087367:218267-220072|KQ087369:804966-806718|KQ087364:854832-858221	http://amigo.geneontology.org/cgi-bin/amigo/term_details?term=GO:0009311
hydro-lyase activity	Gene Ontology	GO:0016836	3	35	0.130366	0.87561	KQ087363:2562131-2563844|KQ087361:486265-487081|KQ087360:1268336-1269852	http://amigo.geneontology.org/cgi-bin/amigo/term_details?term=GO:0016836
microbody	Gene Ontology	GO:0042579	5	77	0.135517	0.87561	KQ087367:547555-549291|KQ087373:518820-520652|KQ087368:22419-24214|KQ087365:2159709-2160555|KQ087375:23302-23890	http://amigo.geneontology.org/cgi-bin/amigo/term_details?term=GO:0042579
peroxisome	Gene Ontology	GO:0005777	5	77	0.135517	0.87561	KQ087367:547555-549291|KQ087373:518820-520652|KQ087368:22419-24214|KQ087365:2159709-2160555|KQ087375:23302-23890	http://amigo.geneontology.org/cgi-bin/amigo/term_details?term=GO:0005777
anion transport	Gene Ontology	GO:0006820	4	56	0.137042	0.87561	KQ087360:2390040-2391787|KQ087359:1411400-1413175|KQ087369:796405-798362|KQ087360:2538058-2539986	http://amigo.geneontology.org/cgi-bin/amigo/term_details?term=GO:0006820
cellular homeostasis	Gene Ontology	GO:0019725	7	123	0.14028	0.87561	KQ087376:132644-133020|KQ087362:3076957-3078700|KQ087375:1054635-1057874|KQ087375:1083141-1084855|KQ087373:896451-898001|KQ087366:1682756-1683611|KQ087365:557223-558575	http://amigo.geneontology.org/cgi-bin/amigo/term_details?term=GO:0019725
carboxylic acid catabolic process	Gene Ontology	GO:0046395	5	78	0.140558	0.87561	KQ087375:702699-704464|KQ087373:518820-520652|KQ087368:22419-24214|KQ087363:1452640-1453806|KQ087360:1268336-1269852	http://amigo.geneontology.org/cgi-bin/amigo/term_details?term=GO:0046395
oxidoreductase activity, acting on single donors with incorporation of molecular oxygen, incorporation of two atoms of oxygen	Gene Ontology	GO:0016702	2	18	0.140797	0.87561	KQ087370:220220-222513|KQ087373:643298-644630	http://amigo.geneontology.org/cgi-bin/amigo/term_details?term=GO:0016702
carbon utilization	Gene Ontology	GO:0015976	2	18	0.140797	0.87561	KQ087373:518820-520652|KQ087368:22419-24214	http://amigo.geneontology.org/cgi-bin/amigo/term_details?term=GO:0015976
cellular response to oxidative stress	Gene Ontology	GO:0034599	5	79	0.145679	0.87561	KQ087373:434260-436619|KQ087374:229954-230815|KQ087376:132644-133020|KQ087365:2159709-2160555|KQ087375:702699-704464	http://amigo.geneontology.org/cgi-bin/amigo/term_details?term=GO:0034599
NADP binding	Gene Ontology	GO:0050661	2	19	0.152375	0.87561	KQ087358:774516-776073|KQ087367:1199056-1200381	http://amigo.geneontology.org/cgi-bin/amigo/term_details?term=GO:0050661
channel activity	Gene Ontology	GO:0015267	2	19	0.152375	0.87561	KQ087370:368885-370011|KQ087359:1411400-1413175	http://amigo.geneontology.org/cgi-bin/amigo/term_details?term=GO:0015267
passive transmembrane transporter activity	Gene Ontology	GO:0022803	2	19	0.152375	0.87561	KQ087370:368885-370011|KQ087359:1411400-1413175	http://amigo.geneontology.org/cgi-bin/amigo/term_details?term=GO:0022803
phosphoric diester hydrolase activity	Gene Ontology	GO:0008081	2	19	0.152375	0.87561	KQ087358:1712792-1714043|KQ087361:486265-487081	http://amigo.geneontology.org/cgi-bin/amigo/term_details?term=GO:0008081
oxidoreductase activity, acting on CH-OH group of donors	Gene Ontology	GO:0016614	7	127	0.156618	0.87561	KQ087370:183021-184094|KQ087363:1452640-1453806|KQ087359:266432-269058|KQ087362:1972584-1974621|KQ087359:2266552-2267534|KQ087369:843849-845735|KQ087358:774516-776073	http://amigo.geneontology.org/cgi-bin/amigo/term_details?term=GO:0016614
oxidoreductase activity, acting on the aldehyde or oxo group of donors, NAD or NADP as acceptor	Gene Ontology	GO:0016620	3	39	0.16162	0.87561	KQ087367:1199056-1200381|KQ087359:153798-155487|KQ087375:702699-704464	http://amigo.geneontology.org/cgi-bin/amigo/term_details?term=GO:0016620
ATP metabolic process	Gene Ontology	GO:0046034	3	39	0.16162	0.87561	KQ087362:1157172-1159141|KQ087363:1452640-1453806|KQ087373:896451-898001	http://amigo.geneontology.org/cgi-bin/amigo/term_details?term=GO:0046034
cellular response to heat	Gene Ontology	GO:0034605	3	39	0.16162	0.87561	KQ087373:434260-436619|KQ087374:229954-230815|KQ087365:2159709-2160555	http://amigo.geneontology.org/cgi-bin/amigo/term_details?term=GO:0034605
monocarboxylic acid catabolic process	Gene Ontology	GO:0072329	3	39	0.16162	0.87561	KQ087373:518820-520652|KQ087368:22419-24214|KQ087360:1268336-1269852	http://amigo.geneontology.org/cgi-bin/amigo/term_details?term=GO:0072329
primary alcohol metabolic process	Gene Ontology	GO:0034308	2	20	0.164131	0.87561	KQ087362:1157172-1159141|KQ087363:1452640-1453806	http://amigo.geneontology.org/cgi-bin/amigo/term_details?term=GO:0034308
inorganic anion transport	Gene Ontology	GO:0015698	2	20	0.164131	0.87561	KQ087359:1411400-1413175|KQ087369:796405-798362	http://amigo.geneontology.org/cgi-bin/amigo/term_details?term=GO:0015698
response to temperature stimulus	Gene Ontology	GO:0009266	4	61	0.168245	0.87561	KQ087373:434260-436619|KQ087374:229954-230815|KQ087365:2159709-2160555|KQ087364:854832-858221	http://amigo.geneontology.org/cgi-bin/amigo/term_details?term=GO:0009266
purine ribonucleoside metabolic process	Gene Ontology	GO:0046128	4	62	0.174768	0.87561	KQ087362:1157172-1159141|KQ087360:1535766-1537176|KQ087363:1452640-1453806|KQ087373:896451-898001	http://amigo.geneontology.org/cgi-bin/amigo/term_details?term=GO:0046128
purine nucleoside metabolic process	Gene Ontology	GO:0042278	4	62	0.174768	0.87561	KQ087362:1157172-1159141|KQ087360:1535766-1537176|KQ087363:1452640-1453806|KQ087373:896451-898001	http://amigo.geneontology.org/cgi-bin/amigo/term_details?term=GO:0042278
hydrolase activity, acting on ester bonds	Gene Ontology	GO:0016788	10	205	0.176694	0.87561	KQ087363:272557-274522|KQ087367:547555-549291|KQ087363:2943619-2945359|KQ087360:999535-1000354|KQ087361:486265-487081|KQ087369:405505-406575|KQ087358:1712792-1714043|KQ087369:909572-910471|KQ087363:1649213-1649693|KQ087365:1755454-1755916	http://amigo.geneontology.org/cgi-bin/amigo/term_details?term=GO:0016788
C4-dicarboxylate transmembrane transporter activity	Gene Ontology	GO:0015556	1	5	0.18308	0.87561	KQ087360:2538058-2539986	http://amigo.geneontology.org/cgi-bin/amigo/term_details?term=GO:0015556
L-methionine salvage	Gene Ontology	GO:0071267	1	5	0.18308	0.87561	KQ087376:132644-133020	http://amigo.geneontology.org/cgi-bin/amigo/term_details?term=GO:0071267
Rho guanyl-nucleotide exchange factor activity	Gene Ontology	GO:0005089	1	5	0.18308	0.87561	KQ087358:2016788-2019530	http://amigo.geneontology.org/cgi-bin/amigo/term_details?term=GO:0005089
allantoin catabolic process	Gene Ontology	GO:0000256	1	5	0.18308	0.87561	KQ087373:518820-520652	http://amigo.geneontology.org/cgi-bin/amigo/term_details?term=GO:0000256
modified amino acid transport	Gene Ontology	GO:0072337	1	5	0.18308	0.87561	KQ087373:622241-624593	http://amigo.geneontology.org/cgi-bin/amigo/term_details?term=GO:0072337
gamma-aminobutyric acid metabolic process	Gene Ontology	GO:0009448	1	5	0.18308	0.87561	KQ087375:702699-704464	http://amigo.geneontology.org/cgi-bin/amigo/term_details?term=GO:0009448
cytolysis	Gene Ontology	GO:0019835	1	5	0.18308	0.87561	KQ087365:1881927-1882409	http://amigo.geneontology.org/cgi-bin/amigo/term_details?term=GO:0019835
trehalose catabolic process	Gene Ontology	GO:0005993	1	5	0.18308	0.87561	KQ087364:854832-858221	http://amigo.geneontology.org/cgi-bin/amigo/term_details?term=GO:0005993
phosphoprotein binding	Gene Ontology	GO:0051219	1	5	0.18308	0.87561	KQ087368:347994-348672	http://amigo.geneontology.org/cgi-bin/amigo/term_details?term=GO:0051219
allantoin metabolic process	Gene Ontology	GO:0000255	1	5	0.18308	0.87561	KQ087373:518820-520652	http://amigo.geneontology.org/cgi-bin/amigo/term_details?term=GO:0000255
negative regulation of cellular protein localization	Gene Ontology	GO:1903828	1	5	0.18308	0.87561	KQ087368:347994-348672	http://amigo.geneontology.org/cgi-bin/amigo/term_details?term=GO:1903828
oxidoreductase activity, acting on a sulfur group of donors, oxygen as acceptor	Gene Ontology	GO:0016670	1	5	0.18308	0.87561	KQ087358:1035226-1036289	http://amigo.geneontology.org/cgi-bin/amigo/term_details?term=GO:0016670
amino acid salvage	Gene Ontology	GO:0043102	1	5	0.18308	0.87561	KQ087376:132644-133020	http://amigo.geneontology.org/cgi-bin/amigo/term_details?term=GO:0043102
regulation of asperthecin biosynthetic process	Gene Ontology	GO:1900379	1	5	0.18308	0.87561	KQ087368:348761-349952	http://amigo.geneontology.org/cgi-bin/amigo/term_details?term=GO:1900379
ribonuclease III activity	Gene Ontology	GO:0004525	1	5	0.18308	0.87561	KQ087363:1649213-1649693	http://amigo.geneontology.org/cgi-bin/amigo/term_details?term=GO:0004525
zinc II ion transmembrane transport	Gene Ontology	GO:0071577	1	5	0.18308	0.87561	KQ087375:1083141-1084855	http://amigo.geneontology.org/cgi-bin/amigo/term_details?term=GO:0071577
response to xenobiotic stimulus	Gene Ontology	GO:0009410	1	5	0.18308	0.87561	KQ087361:486265-487081	http://amigo.geneontology.org/cgi-bin/amigo/term_details?term=GO:0009410
phosphogluconate dehydrogenase (decarboxylating) activity	Gene Ontology	GO:0004616	1	5	0.18308	0.87561	KQ087358:774516-776073	http://amigo.geneontology.org/cgi-bin/amigo/term_details?term=GO:0004616
double-stranded RNA-specific ribonuclease activity	Gene Ontology	GO:0032296	1	5	0.18308	0.87561	KQ087363:1649213-1649693	http://amigo.geneontology.org/cgi-bin/amigo/term_details?term=GO:0032296
structural constituent of cell wall	Gene Ontology	GO:0005199	1	5	0.18308	0.87561	KQ087367:220174-220731	http://amigo.geneontology.org/cgi-bin/amigo/term_details?term=GO:0005199
positive regulation of gliotoxin biosynthetic process	Gene Ontology	GO:1900691	1	5	0.18308	0.87561	KQ087358:1010971-1012453	http://amigo.geneontology.org/cgi-bin/amigo/term_details?term=GO:1900691
fungal-type vacuole lumen	Gene Ontology	GO:0000328	1	5	0.18308	0.87561	KQ087360:2538058-2539986	http://amigo.geneontology.org/cgi-bin/amigo/term_details?term=GO:0000328
tripeptide transport	Gene Ontology	GO:0042939	1	5	0.18308	0.87561	KQ087373:622241-624593	http://amigo.geneontology.org/cgi-bin/amigo/term_details?term=GO:0042939
active transmembrane transporter activity	Gene Ontology	GO:0022804	6	110	0.186887	0.87561	KQ087375:1054635-1057874|KQ087359:1411400-1413175|KQ087373:541958-546058|KQ087369:796405-798362|KQ087363:141459-146109|KQ087373:480236-483672	http://amigo.geneontology.org/cgi-bin/amigo/term_details?term=GO:0022804
alcohol biosynthetic process	Gene Ontology	GO:0046165	4	64	0.188065	0.87561	KQ087368:410167-412357|KQ087362:1157172-1159141|KQ087363:1452640-1453806|KQ087359:225790-227494	http://amigo.geneontology.org/cgi-bin/amigo/term_details?term=GO:0046165
ATPase activity, coupled to transmembrane movement of substances	Gene Ontology	GO:0042626	4	64	0.188065	0.87561	KQ087373:541958-546058|KQ087363:141459-146109|KQ087373:480236-483672|KQ087375:1054635-1057874	http://amigo.geneontology.org/cgi-bin/amigo/term_details?term=GO:0042626
nonribosomal peptide biosynthetic process	Gene Ontology	GO:0019184	2	22	0.18808	0.87561	KQ087358:1016612-1023117|KQ087358:1003501-1007320	http://amigo.geneontology.org/cgi-bin/amigo/term_details?term=GO:0019184
hydrolase activity, acting on acid anhydrides, catalyzing transmembrane movement of substances	Gene Ontology	GO:0016820	4	65	0.194833	0.87561	KQ087373:541958-546058|KQ087363:141459-146109|KQ087373:480236-483672|KQ087375:1054635-1057874	http://amigo.geneontology.org/cgi-bin/amigo/term_details?term=GO:0016820
ATPase activity, coupled to movement of substances	Gene Ontology	GO:0043492	4	65	0.194833	0.87561	KQ087373:541958-546058|KQ087363:141459-146109|KQ087373:480236-483672|KQ087375:1054635-1057874	http://amigo.geneontology.org/cgi-bin/amigo/term_details?term=GO:0043492
purine ribonucleoside triphosphate metabolic process	Gene Ontology	GO:0009205	3	43	0.194848	0.87561	KQ087362:1157172-1159141|KQ087363:1452640-1453806|KQ087373:896451-898001	http://amigo.geneontology.org/cgi-bin/amigo/term_details?term=GO:0009205
alcohol metabolic process	Gene Ontology	GO:0006066	5	88	0.195096	0.87561	KQ087368:410167-412357|KQ087362:1157172-1159141|KQ087358:1712792-1714043|KQ087363:1452640-1453806|KQ087359:225790-227494	http://amigo.geneontology.org/cgi-bin/amigo/term_details?term=GO:0006066
endoribonuclease activity	Gene Ontology	GO:0004521	2	23	0.200228	0.87561	KQ087363:1649213-1649693|KQ087365:1755454-1755916	http://amigo.geneontology.org/cgi-bin/amigo/term_details?term=GO:0004521
lipid metabolic process	Gene Ontology	GO:0006629	12	263	0.202035	0.87561	KQ087363:272557-274522|KQ087367:547555-549291|KQ087373:1095640-1096498|KQ087359:225790-227494|KQ087367:307111-310254|KQ087373:518820-520652|KQ087363:2562131-2563844|KQ087369:405505-406575|KQ087358:1712792-1714043|KQ087368:410167-412357|KQ087368:22419-24214|KQ087360:1268336-1269852	http://amigo.geneontology.org/cgi-bin/amigo/term_details?term=GO:0006629
cellular lipid metabolic process	Gene Ontology	GO:0044255	10	212	0.20206	0.87561	KQ087363:272557-274522|KQ087367:547555-549291|KQ087373:1095640-1096498|KQ087359:225790-227494|KQ087367:307111-310254|KQ087373:518820-520652|KQ087363:2562131-2563844|KQ087368:410167-412357|KQ087368:22419-24214|KQ087360:1268336-1269852	http://amigo.geneontology.org/cgi-bin/amigo/term_details?term=GO:0044255
ribonucleoside triphosphate metabolic process	Gene Ontology	GO:0009199	3	44	0.203406	0.87561	KQ087362:1157172-1159141|KQ087363:1452640-1453806|KQ087373:896451-898001	http://amigo.geneontology.org/cgi-bin/amigo/term_details?term=GO:0009199
purine nucleoside triphosphate metabolic process	Gene Ontology	GO:0009144	3	44	0.203406	0.87561	KQ087362:1157172-1159141|KQ087363:1452640-1453806|KQ087373:896451-898001	http://amigo.geneontology.org/cgi-bin/amigo/term_details?term=GO:0009144
organic acid catabolic process	Gene Ontology	GO:0016054	5	90	0.206799	0.87561	KQ087375:702699-704464|KQ087373:518820-520652|KQ087368:22419-24214|KQ087363:1452640-1453806|KQ087360:1268336-1269852	http://amigo.geneontology.org/cgi-bin/amigo/term_details?term=GO:0016054
primary active transmembrane transporter activity	Gene Ontology	GO:0015399	4	67	0.208588	0.87561	KQ087373:541958-546058|KQ087363:141459-146109|KQ087373:480236-483672|KQ087375:1054635-1057874	http://amigo.geneontology.org/cgi-bin/amigo/term_details?term=GO:0015399
P-P-bond-hydrolysis-driven transmembrane transporter activity	Gene Ontology	GO:0015405	4	67	0.208588	0.87561	KQ087373:541958-546058|KQ087363:141459-146109|KQ087373:480236-483672|KQ087375:1054635-1057874	http://amigo.geneontology.org/cgi-bin/amigo/term_details?term=GO:0015405
glutathione transferase activity	Gene Ontology	GO:0004364	1	6	0.210163	0.87561	KQ087368:347994-348672	http://amigo.geneontology.org/cgi-bin/amigo/term_details?term=GO:0004364
oligopeptide transmembrane transport	Gene Ontology	GO:0035672	1	6	0.210163	0.87561	KQ087373:622241-624593	http://amigo.geneontology.org/cgi-bin/amigo/term_details?term=GO:0035672
glucose binding	Gene Ontology	GO:0005536	1	6	0.210163	0.87561	KQ087373:896451-898001	http://amigo.geneontology.org/cgi-bin/amigo/term_details?term=GO:0005536
glutathione peroxidase activity	Gene Ontology	GO:0004602	1	6	0.210163	0.87561	KQ087368:347994-348672	http://amigo.geneontology.org/cgi-bin/amigo/term_details?term=GO:0004602
purine nucleoside bisphosphate metabolic process	Gene Ontology	GO:0034032	1	6	0.210163	0.87561	KQ087360:1535766-1537176	http://amigo.geneontology.org/cgi-bin/amigo/term_details?term=GO:0034032
response to farnesol	Gene Ontology	GO:0097307	1	6	0.210163	0.87561	KQ087365:2159709-2160555	http://amigo.geneontology.org/cgi-bin/amigo/term_details?term=GO:0097307
nucleoside bisphosphate metabolic process	Gene Ontology	GO:0033865	1	6	0.210163	0.87561	KQ087360:1535766-1537176	http://amigo.geneontology.org/cgi-bin/amigo/term_details?term=GO:0033865
oligopeptide transmembrane transporter activity	Gene Ontology	GO:0035673	1	6	0.210163	0.87561	KQ087373:622241-624593	http://amigo.geneontology.org/cgi-bin/amigo/term_details?term=GO:0035673
ribonucleoside bisphosphate metabolic process	Gene Ontology	GO:0033875	1	6	0.210163	0.87561	KQ087360:1535766-1537176	http://amigo.geneontology.org/cgi-bin/amigo/term_details?term=GO:0033875
nucleobase transport	Gene Ontology	GO:0015851	1	6	0.210163	0.87561	KQ087373:980127-981877	http://amigo.geneontology.org/cgi-bin/amigo/term_details?term=GO:0015851
polyamine transmembrane transporter activity	Gene Ontology	GO:0015203	1	6	0.210163	0.87561	KQ087365:2085944-2087615	http://amigo.geneontology.org/cgi-bin/amigo/term_details?term=GO:0015203
regulation of gliotoxin biosynthetic process	Gene Ontology	GO:1900689	1	6	0.210163	0.87561	KQ087358:1010971-1012453	http://amigo.geneontology.org/cgi-bin/amigo/term_details?term=GO:1900689
vacuolar lumen	Gene Ontology	GO:0005775	1	6	0.210163	0.87561	KQ087360:2538058-2539986	http://amigo.geneontology.org/cgi-bin/amigo/term_details?term=GO:0005775
glycerol ether metabolic process	Gene Ontology	GO:0006662	1	6	0.210163	0.87561	KQ087376:132644-133020	http://amigo.geneontology.org/cgi-bin/amigo/term_details?term=GO:0006662
C4-dicarboxylate transport	Gene Ontology	GO:0015740	1	6	0.210163	0.87561	KQ087360:2538058-2539986	http://amigo.geneontology.org/cgi-bin/amigo/term_details?term=GO:0015740
short-chain fatty acid catabolic process	Gene Ontology	GO:0019626	1	6	0.210163	0.87561	KQ087360:1268336-1269852	http://amigo.geneontology.org/cgi-bin/amigo/term_details?term=GO:0019626
inorganic phosphate transmembrane transporter activity	Gene Ontology	GO:0005315	1	6	0.210163	0.87561	KQ087369:796405-798362	http://amigo.geneontology.org/cgi-bin/amigo/term_details?term=GO:0005315
nucleobase transmembrane transporter activity	Gene Ontology	GO:0015205	1	6	0.210163	0.87561	KQ087373:980127-981877	http://amigo.geneontology.org/cgi-bin/amigo/term_details?term=GO:0015205
glucose transport	Gene Ontology	GO:0015758	1	6	0.210163	0.87561	KQ087373:896451-898001	http://amigo.geneontology.org/cgi-bin/amigo/term_details?term=GO:0015758
cellular response to farnesol	Gene Ontology	GO:0097308	1	6	0.210163	0.87561	KQ087365:2159709-2160555	http://amigo.geneontology.org/cgi-bin/amigo/term_details?term=GO:0097308
positive regulation of coenzyme metabolic process	Gene Ontology	GO:0051197	1	6	0.210163	0.87561	KQ087368:348761-349952	http://amigo.geneontology.org/cgi-bin/amigo/term_details?term=GO:0051197
mismatched DNA binding	Gene Ontology	GO:0030983	1	6	0.210163	0.87561	KQ087367:469444-472189	http://amigo.geneontology.org/cgi-bin/amigo/term_details?term=GO:0030983
hexokinase activity	Gene Ontology	GO:0004396	1	6	0.210163	0.87561	KQ087373:896451-898001	http://amigo.geneontology.org/cgi-bin/amigo/term_details?term=GO:0004396
dipeptidyl-peptidase activity	Gene Ontology	GO:0008239	1	6	0.210163	0.87561	KQ087375:1026593-1028945	http://amigo.geneontology.org/cgi-bin/amigo/term_details?term=GO:0008239
threonine catabolic process	Gene Ontology	GO:0006567	1	6	0.210163	0.87561	KQ087363:1452640-1453806	http://amigo.geneontology.org/cgi-bin/amigo/term_details?term=GO:0006567
phospholipid catabolic process	Gene Ontology	GO:0009395	1	6	0.210163	0.87561	KQ087363:272557-274522	http://amigo.geneontology.org/cgi-bin/amigo/term_details?term=GO:0009395
oxidoreductase activity, acting on single donors with incorporation of molecular oxygen	Gene Ontology	GO:0016701	2	24	0.212465	0.87561	KQ087370:220220-222513|KQ087373:643298-644630	http://amigo.geneontology.org/cgi-bin/amigo/term_details?term=GO:0016701
anion transmembrane transporter activity	Gene Ontology	GO:0008509	2	24	0.212465	0.87561	KQ087359:1411400-1413175|KQ087360:2538058-2539986	http://amigo.geneontology.org/cgi-bin/amigo/term_details?term=GO:0008509
oxidoreductase activity, acting on the aldehyde or oxo group of donors	Gene Ontology	GO:0016903	3	46	0.220771	0.87561	KQ087367:1199056-1200381|KQ087359:153798-155487|KQ087375:702699-704464	http://amigo.geneontology.org/cgi-bin/amigo/term_details?term=GO:0016903
sterigmatocystin metabolic process	Gene Ontology	GO:0045460	3	46	0.220771	0.87561	KQ087368:348761-349952|KQ087365:2159709-2160555|KQ087370:82247-83719	http://amigo.geneontology.org/cgi-bin/amigo/term_details?term=GO:0045460
sterigmatocystin biosynthetic process	Gene Ontology	GO:0045461	3	46	0.220771	0.87561	KQ087368:348761-349952|KQ087365:2159709-2160555|KQ087370:82247-83719	http://amigo.geneontology.org/cgi-bin/amigo/term_details?term=GO:0045461
coenzyme metabolic process	Gene Ontology	GO:0006732	6	117	0.223271	0.87561	KQ087367:547555-549291|KQ087362:1157172-1159141|KQ087363:1452640-1453806|KQ087368:348761-349952|KQ087373:896451-898001|KQ087358:774516-776073	http://amigo.geneontology.org/cgi-bin/amigo/term_details?term=GO:0006732
ribose phosphate metabolic process	Gene Ontology	GO:0019693	5	93	0.22477	0.87561	KQ087358:774516-776073|KQ087362:1157172-1159141|KQ087360:1535766-1537176|KQ087363:1452640-1453806|KQ087373:896451-898001	http://amigo.geneontology.org/cgi-bin/amigo/term_details?term=GO:0019693
oxidoreductase activity, acting on a sulfur group of donors	Gene Ontology	GO:0016667	2	25	0.22477	0.87561	KQ087376:132644-133020|KQ087358:1035226-1036289	http://amigo.geneontology.org/cgi-bin/amigo/term_details?term=GO:0016667
lipase activity	Gene Ontology	GO:0016298	2	25	0.22477	0.87561	KQ087363:272557-274522|KQ087369:405505-406575	http://amigo.geneontology.org/cgi-bin/amigo/term_details?term=GO:0016298
peroxisomal part	Gene Ontology	GO:0044439	2	25	0.22477	0.87561	KQ087373:518820-520652|KQ087368:22419-24214	http://amigo.geneontology.org/cgi-bin/amigo/term_details?term=GO:0044439
microbody part	Gene Ontology	GO:0044438	2	25	0.22477	0.87561	KQ087373:518820-520652|KQ087368:22419-24214	http://amigo.geneontology.org/cgi-bin/amigo/term_details?term=GO:0044438
FMN binding	Gene Ontology	GO:0010181	2	25	0.22477	0.87561	KQ087365:557223-558575|KQ087369:814467-815786	http://amigo.geneontology.org/cgi-bin/amigo/term_details?term=GO:0010181
substrate-specific transmembrane transporter activity	Gene Ontology	GO:0022891	11	245	0.229541	0.87561	KQ087367:1577327-1579154|KQ087373:622241-624593|KQ087373:980127-981877|KQ087370:368885-370011|KQ087359:1411400-1413175|KQ087360:2390040-2391787|KQ087375:1054635-1057874|KQ087365:2085944-2087615|KQ087375:1083141-1084855|KQ087360:2538058-2539986|KQ087373:480236-483672	http://amigo.geneontology.org/cgi-bin/amigo/term_details?term=GO:0022891
methyltransferase activity	Gene Ontology	GO:0008168	5	94	0.230863	0.87561	KQ087368:360409-362046|KQ087360:1953270-1954293|KQ087359:17246-18199|KQ087368:37246-38224|KQ087368:338163-339123	http://amigo.geneontology.org/cgi-bin/amigo/term_details?term=GO:0008168
peptidase activity, acting on L-amino acid peptides	Gene Ontology	GO:0070011	5	94	0.230863	0.87561	KQ087375:1026593-1028945|KQ087360:2488577-2491201|KQ087374:219550-220229|KQ087360:585536-586935|KQ087365:1666693-1668551	http://amigo.geneontology.org/cgi-bin/amigo/term_details?term=GO:0070011
hydrolase activity	Gene Ontology	GO:0016787	37	948	0.230886	0.87561	KQ087367:547555-549291|KQ087360:2488577-2491201|KQ087360:999535-1000354|KQ087364:854832-858221|KQ087358:2340201-2341169|KQ087370:277312-277699|KQ087359:1491741-1492919|KQ087365:1666693-1668551|KQ087367:1556227-1558387|KQ087363:141459-146109|KQ087360:997178-998173|KQ087367:1442764-1444280|KQ087360:585536-586935|KQ087365:2099302-2100451|KQ087359:2233187-2233945|KQ087367:276751-277801|KQ087363:16492…	http://amigo.geneontology.org/cgi-bin/amigo/term_details?term=GO:0016787
peptide transmembrane transporter activity	Gene Ontology	GO:1904680	1	7	0.236351	0.87561	KQ087373:622241-624593	http://amigo.geneontology.org/cgi-bin/amigo/term_details?term=GO:1904680
aspartate family amino acid catabolic process	Gene Ontology	GO:0009068	1	7	0.236351	0.87561	KQ087363:1452640-1453806	http://amigo.geneontology.org/cgi-bin/amigo/term_details?term=GO:0009068
negative regulation of transport	Gene Ontology	GO:0051051	1	7	0.236351	0.87561	KQ087368:347994-348672	http://amigo.geneontology.org/cgi-bin/amigo/term_details?term=GO:0051051
response to cold	Gene Ontology	GO:0009409	1	7	0.236351	0.87561	KQ087364:854832-858221	http://amigo.geneontology.org/cgi-bin/amigo/term_details?term=GO:0009409
hydrolase activity, acting on acid carbon-carbon bonds	Gene Ontology	GO:0016822	1	7	0.236351	0.87561	KQ087359:110471-111555	http://amigo.geneontology.org/cgi-bin/amigo/term_details?term=GO:0016822
hydrolase activity, acting on acid carbon-carbon bonds, in ketonic substances	Gene Ontology	GO:0016823	1	7	0.236351	0.87561	KQ087359:110471-111555	http://amigo.geneontology.org/cgi-bin/amigo/term_details?term=GO:0016823
carbohydrate phosphorylation	Gene Ontology	GO:0046835	1	7	0.236351	0.87561	KQ087373:896451-898001	http://amigo.geneontology.org/cgi-bin/amigo/term_details?term=GO:0046835
response to alkaline pH	Gene Ontology	GO:0010446	1	7	0.236351	0.87561	KQ087367:547555-549291	http://amigo.geneontology.org/cgi-bin/amigo/term_details?term=GO:0010446
ferric iron binding	Gene Ontology	GO:0008199	1	7	0.236351	0.87561	KQ087373:643298-644630	http://amigo.geneontology.org/cgi-bin/amigo/term_details?term=GO:0008199
voltage-gated channel activity	Gene Ontology	GO:0022832	1	7	0.236351	0.87561	KQ087359:1411400-1413175	http://amigo.geneontology.org/cgi-bin/amigo/term_details?term=GO:0022832
spore wall	Gene Ontology	GO:0031160	1	7	0.236351	0.87561	KQ087364:854832-858221	http://amigo.geneontology.org/cgi-bin/amigo/term_details?term=GO:0031160
response to oxygen levels	Gene Ontology	GO:0070482	1	7	0.236351	0.87561	KQ087369:435390-436842	http://amigo.geneontology.org/cgi-bin/amigo/term_details?term=GO:0070482
cellular response to alkaline pH	Gene Ontology	GO:0071469	1	7	0.236351	0.87561	KQ087367:547555-549291	http://amigo.geneontology.org/cgi-bin/amigo/term_details?term=GO:0071469
zinc II ion transport	Gene Ontology	GO:0006829	1	7	0.236351	0.87561	KQ087375:1083141-1084855	http://amigo.geneontology.org/cgi-bin/amigo/term_details?term=GO:0006829
polyamine transport	Gene Ontology	GO:0015846	1	7	0.236351	0.87561	KQ087365:2085944-2087615	http://amigo.geneontology.org/cgi-bin/amigo/term_details?term=GO:0015846
oligopeptide transporter activity	Gene Ontology	GO:0015198	1	7	0.236351	0.87561	KQ087373:622241-624593	http://amigo.geneontology.org/cgi-bin/amigo/term_details?term=GO:0015198
regulation of coenzyme metabolic process	Gene Ontology	GO:0051196	1	7	0.236351	0.87561	KQ087368:348761-349952	http://amigo.geneontology.org/cgi-bin/amigo/term_details?term=GO:0051196
cellular response to oxygen levels	Gene Ontology	GO:0071453	1	7	0.236351	0.87561	KQ087369:435390-436842	http://amigo.geneontology.org/cgi-bin/amigo/term_details?term=GO:0071453
regulation of transcription factor import into nucleus	Gene Ontology	GO:0042990	1	7	0.236351	0.87561	KQ087368:347994-348672	http://amigo.geneontology.org/cgi-bin/amigo/term_details?term=GO:0042990
positive regulation of cofactor metabolic process	Gene Ontology	GO:0051194	1	7	0.236351	0.87561	KQ087368:348761-349952	http://amigo.geneontology.org/cgi-bin/amigo/term_details?term=GO:0051194
phosphoric ester hydrolase activity	Gene Ontology	GO:0042578	4	71	0.236872	0.87561	KQ087369:909572-910471|KQ087363:2943619-2945359|KQ087358:1712792-1714043|KQ087361:486265-487081	http://amigo.geneontology.org/cgi-bin/amigo/term_details?term=GO:0042578
fungal-type cell wall	Gene Ontology	GO:0009277	4	72	0.244083	0.87561	KQ087367:220174-220731|KQ087362:1747125-1748285|KQ087359:225790-227494|KQ087364:854832-858221	http://amigo.geneontology.org/cgi-bin/amigo/term_details?term=GO:0009277
ribonucleoside metabolic process	Gene Ontology	GO:0009119	4	72	0.244083	0.87561	KQ087362:1157172-1159141|KQ087360:1535766-1537176|KQ087363:1452640-1453806|KQ087373:896451-898001	http://amigo.geneontology.org/cgi-bin/amigo/term_details?term=GO:0009119
response to heat	Gene Ontology	GO:0009408	3	49	0.247336	0.87561	KQ087373:434260-436619|KQ087374:229954-230815|KQ087365:2159709-2160555	http://amigo.geneontology.org/cgi-bin/amigo/term_details?term=GO:0009408
transcription cofactor activity	Gene Ontology	GO:0003712	2	27	0.24952	0.87561	KQ087368:347994-348672|KQ087368:351403-352769	http://amigo.geneontology.org/cgi-bin/amigo/term_details?term=GO:0003712
ion binding	Gene Ontology	GO:0043167	30	764	0.249772	0.87561	KQ087373:1095640-1096498|KQ087358:1010971-1012453|KQ087358:1033352-1034924|KQ087363:1452640-1453806|KQ087359:2188715-2190753|KQ087367:423921-426010|KQ087370:277312-277699|KQ087370:82247-83719|KQ087370:28124-30599|KQ087373:643298-644630|KQ087359:2059065-2061695|KQ087362:1157172-1159141|KQ087363:2611182-2612288|KQ087373:1051779-1053812|KQ087359:59415-61245|KQ087365:2385862-2391569|KQ087367:266419-2…	http://amigo.geneontology.org/cgi-bin/amigo/term_details?term=GO:0043167
purine ribonucleotide metabolic process	Gene Ontology	GO:0009150	4	73	0.251343	0.87561	KQ087362:1157172-1159141|KQ087360:1535766-1537176|KQ087363:1452640-1453806|KQ087373:896451-898001	http://amigo.geneontology.org/cgi-bin/amigo/term_details?term=GO:0009150
ion transport	Gene Ontology	GO:0006811	8	173	0.251916	0.87561	KQ087370:368885-370011|KQ087359:1411400-1413175|KQ087360:2390040-2391787|KQ087375:1054635-1057874|KQ087369:796405-798362|KQ087375:1083141-1084855|KQ087360:2538058-2539986|KQ087373:480236-483672	http://amigo.geneontology.org/cgi-bin/amigo/term_details?term=GO:0006811
nucleoside triphosphate metabolic process	Gene Ontology	GO:0009141	3	50	0.256301	0.87561	KQ087362:1157172-1159141|KQ087363:1452640-1453806|KQ087373:896451-898001	http://amigo.geneontology.org/cgi-bin/amigo/term_details?term=GO:0009141
purine nucleotide metabolic process	Gene Ontology	GO:0006163	4	74	0.258649	0.87561	KQ087362:1157172-1159141|KQ087360:1535766-1537176|KQ087363:1452640-1453806|KQ087373:896451-898001	http://amigo.geneontology.org/cgi-bin/amigo/term_details?term=GO:0006163
oxidoreductase activity, acting on the CH-CH group of donors, NAD or NADP as acceptor	Gene Ontology	GO:0016628	1	8	0.261673	0.87561	KQ087369:435390-436842	http://amigo.geneontology.org/cgi-bin/amigo/term_details?term=GO:0016628
zinc ion homeostasis	Gene Ontology	GO:0055069	1	8	0.261673	0.87561	KQ087375:1083141-1084855	http://amigo.geneontology.org/cgi-bin/amigo/term_details?term=GO:0055069
monosaccharide binding	Gene Ontology	GO:0048029	1	8	0.261673	0.87561	KQ087373:896451-898001	http://amigo.geneontology.org/cgi-bin/amigo/term_details?term=GO:0048029
acid phosphatase activity	Gene Ontology	GO:0003993	1	8	0.261673	0.87561	KQ087363:2943619-2945359	http://amigo.geneontology.org/cgi-bin/amigo/term_details?term=GO:0003993
hexose transport	Gene Ontology	GO:0008645	1	8	0.261673	0.87561	KQ087373:896451-898001	http://amigo.geneontology.org/cgi-bin/amigo/term_details?term=GO:0008645
regulation of nitrogen utilization	Gene Ontology	GO:0006808	1	8	0.261673	0.87561	KQ087368:347994-348672	http://amigo.geneontology.org/cgi-bin/amigo/term_details?term=GO:0006808
calcium ion transmembrane transport	Gene Ontology	GO:0070588	1	8	0.261673	0.87561	KQ087375:1054635-1057874	http://amigo.geneontology.org/cgi-bin/amigo/term_details?term=GO:0070588
sulfate assimilation	Gene Ontology	GO:0000103	1	8	0.261673	0.87561	KQ087376:132644-133020	http://amigo.geneontology.org/cgi-bin/amigo/term_details?term=GO:0000103
establishment of protein localization to plasma membrane	Gene Ontology	GO:0090002	1	8	0.261673	0.87561	KQ087359:370703-371359	http://amigo.geneontology.org/cgi-bin/amigo/term_details?term=GO:0090002
regulation of Rho protein signal transduction	Gene Ontology	GO:0035023	1	8	0.261673	0.87561	KQ087358:2016788-2019530	http://amigo.geneontology.org/cgi-bin/amigo/term_details?term=GO:0035023
glycerol metabolic process	Gene Ontology	GO:0006071	1	8	0.261673	0.87561	KQ087358:1712792-1714043	http://amigo.geneontology.org/cgi-bin/amigo/term_details?term=GO:0006071
cell wall-bounded periplasmic space	Gene Ontology	GO:0030287	1	8	0.261673	0.87561	KQ087364:854832-858221	http://amigo.geneontology.org/cgi-bin/amigo/term_details?term=GO:0030287
regulation of cofactor metabolic process	Gene Ontology	GO:0051193	1	8	0.261673	0.87561	KQ087368:348761-349952	http://amigo.geneontology.org/cgi-bin/amigo/term_details?term=GO:0051193
phosphate ion transport	Gene Ontology	GO:0006817	1	8	0.261673	0.87561	KQ087369:796405-798362	http://amigo.geneontology.org/cgi-bin/amigo/term_details?term=GO:0006817
dicarboxylic acid transmembrane transporter activity	Gene Ontology	GO:0005310	1	8	0.261673	0.87561	KQ087360:2538058-2539986	http://amigo.geneontology.org/cgi-bin/amigo/term_details?term=GO:0005310
transferase activity, transferring acyl groups, acyl groups converted into alkyl on transfer	Gene Ontology	GO:0046912	1	8	0.261673	0.87561	KQ087373:518820-520652	http://amigo.geneontology.org/cgi-bin/amigo/term_details?term=GO:0046912
cellular response to lipid	Gene Ontology	GO:0071396	1	8	0.261673	0.87561	KQ087365:2159709-2160555	http://amigo.geneontology.org/cgi-bin/amigo/term_details?term=GO:0071396
cellular zinc ion homeostasis	Gene Ontology	GO:0006882	1	8	0.261673	0.87561	KQ087375:1083141-1084855	http://amigo.geneontology.org/cgi-bin/amigo/term_details?term=GO:0006882
guanosine-containing compound metabolic process	Gene Ontology	GO:1901068	1	8	0.261673	0.87561	KQ087360:1535766-1537176	http://amigo.geneontology.org/cgi-bin/amigo/term_details?term=GO:1901068
dicarboxylic acid transport	Gene Ontology	GO:0006835	1	8	0.261673	0.87561	KQ087360:2538058-2539986	http://amigo.geneontology.org/cgi-bin/amigo/term_details?term=GO:0006835
response to lipid	Gene Ontology	GO:0033993	1	8	0.261673	0.87561	KQ087365:2159709-2160555	http://amigo.geneontology.org/cgi-bin/amigo/term_details?term=GO:0033993
oligopeptide transport	Gene Ontology	GO:0006857	1	8	0.261673	0.87561	KQ087373:622241-624593	http://amigo.geneontology.org/cgi-bin/amigo/term_details?term=GO:0006857
homeostatic process	Gene Ontology	GO:0042592	7	151	0.269928	0.87561	KQ087376:132644-133020|KQ087362:3076957-3078700|KQ087375:1054635-1057874|KQ087375:1083141-1084855|KQ087373:896451-898001|KQ087366:1682756-1683611|KQ087365:557223-558575	http://amigo.geneontology.org/cgi-bin/amigo/term_details?term=GO:0042592
carboxylic acid transmembrane transporter activity	Gene Ontology	GO:0046943	2	29	0.274344	0.87561	KQ087360:2390040-2391787|KQ087360:2538058-2539986	http://amigo.geneontology.org/cgi-bin/amigo/term_details?term=GO:0046943
divalent metal ion transport	Gene Ontology	GO:0070838	2	29	0.274344	0.87561	KQ087375:1054635-1057874|KQ087375:1083141-1084855	http://amigo.geneontology.org/cgi-bin/amigo/term_details?term=GO:0070838
transferase activity, transferring one-carbon groups	Gene Ontology	GO:0016741	5	101	0.274706	0.87561	KQ087368:360409-362046|KQ087360:1953270-1954293|KQ087359:17246-18199|KQ087368:37246-38224|KQ087368:338163-339123	http://amigo.geneontology.org/cgi-bin/amigo/term_details?term=GO:0016741
cell wall	Gene Ontology	GO:0005618	4	77	0.280799	0.87561	KQ087367:220174-220731|KQ087362:1747125-1748285|KQ087359:225790-227494|KQ087364:854832-858221	http://amigo.geneontology.org/cgi-bin/amigo/term_details?term=GO:0005618
small molecule metabolic process	Gene Ontology	GO:0044281	26	667	0.281335	0.87561	KQ087367:547555-549291|KQ087373:1095640-1096498|KQ087363:1452640-1453806|KQ087360:1535766-1537176|KQ087367:423921-426010|KQ087368:348761-349952|KQ087359:2263883-2266350|KQ087367:1199056-1200381|KQ087368:410167-412357|KQ087360:1268336-1269852|KQ087362:1157172-1159141|KQ087373:518820-520652|KQ087358:774516-776073|KQ087375:702699-704464|KQ087368:351403-352769|KQ087359:225790-227494|KQ087369:836595-8…	http://amigo.geneontology.org/cgi-bin/amigo/term_details?term=GO:0044281
regulation of protein targeting	Gene Ontology	GO:1903533	1	9	0.286158	0.87561	KQ087368:347994-348672	http://amigo.geneontology.org/cgi-bin/amigo/term_details?term=GO:1903533
plasma membrane region	Gene Ontology	GO:0098590	1	9	0.286158	0.87561	KQ087359:370703-371359	http://amigo.geneontology.org/cgi-bin/amigo/term_details?term=GO:0098590
Ras guanyl-nucleotide exchange factor activity	Gene Ontology	GO:0005088	1	9	0.286158	0.87561	KQ087358:2016788-2019530	http://amigo.geneontology.org/cgi-bin/amigo/term_details?term=GO:0005088
threonine metabolic process	Gene Ontology	GO:0006566	1	9	0.286158	0.87561	KQ087363:1452640-1453806	http://amigo.geneontology.org/cgi-bin/amigo/term_details?term=GO:0006566
vacuole inheritance	Gene Ontology	GO:0000011	1	9	0.286158	0.87561	KQ087376:132644-133020	http://amigo.geneontology.org/cgi-bin/amigo/term_details?term=GO:0000011
protein localization to plasma membrane	Gene Ontology	GO:0072659	1	9	0.286158	0.87561	KQ087359:370703-371359	http://amigo.geneontology.org/cgi-bin/amigo/term_details?term=GO:0072659
regulation of protein import into nucleus	Gene Ontology	GO:0042306	1	9	0.286158	0.87561	KQ087368:347994-348672	http://amigo.geneontology.org/cgi-bin/amigo/term_details?term=GO:0042306
monosaccharide transport	Gene Ontology	GO:0015749	1	9	0.286158	0.87561	KQ087373:896451-898001	http://amigo.geneontology.org/cgi-bin/amigo/term_details?term=GO:0015749
peptide transporter activity	Gene Ontology	GO:0015197	1	9	0.286158	0.87561	KQ087373:622241-624593	http://amigo.geneontology.org/cgi-bin/amigo/term_details?term=GO:0015197
ATPase activity, coupled to transmembrane movement of ions, phosphorylative mechanism	Gene Ontology	GO:0015662	1	9	0.286158	0.87561	KQ087375:1054635-1057874	http://amigo.geneontology.org/cgi-bin/amigo/term_details?term=GO:0015662
L-methionine biosynthetic process	Gene Ontology	GO:0071265	1	9	0.286158	0.87561	KQ087376:132644-133020	http://amigo.geneontology.org/cgi-bin/amigo/term_details?term=GO:0071265
membrane raft	Gene Ontology	GO:0045121	1	9	0.286158	0.87561	KQ087359:370703-371359	http://amigo.geneontology.org/cgi-bin/amigo/term_details?term=GO:0045121
organic anion transmembrane transporter activity	Gene Ontology	GO:0008514	1	9	0.286158	0.87561	KQ087360:2538058-2539986	http://amigo.geneontology.org/cgi-bin/amigo/term_details?term=GO:0008514
oxidoreductase activity, acting on other nitrogenous compounds as donors	Gene Ontology	GO:0016661	1	9	0.286158	0.87561	KQ087376:127886-129986	http://amigo.geneontology.org/cgi-bin/amigo/term_details?term=GO:0016661
cellular potassium ion transport	Gene Ontology	GO:0071804	1	9	0.286158	0.87561	KQ087375:1054635-1057874	http://amigo.geneontology.org/cgi-bin/amigo/term_details?term=GO:0071804
membrane microdomain	Gene Ontology	GO:0098857	1	9	0.286158	0.87561	KQ087359:370703-371359	http://amigo.geneontology.org/cgi-bin/amigo/term_details?term=GO:0098857
regulation of protein import	Gene Ontology	GO:1904589	1	9	0.286158	0.87561	KQ087368:347994-348672	http://amigo.geneontology.org/cgi-bin/amigo/term_details?term=GO:1904589
potassium ion transmembrane transport	Gene Ontology	GO:0071805	1	9	0.286158	0.87561	KQ087375:1054635-1057874	http://amigo.geneontology.org/cgi-bin/amigo/term_details?term=GO:0071805
transferase activity, transferring sulfur-containing groups	Gene Ontology	GO:0016782	1	9	0.286158	0.87561	KQ087367:547555-549291	http://amigo.geneontology.org/cgi-bin/amigo/term_details?term=GO:0016782
cellular divalent inorganic cation homeostasis	Gene Ontology	GO:0072503	2	30	0.286749	0.87561	KQ087375:1054635-1057874|KQ087375:1083141-1084855	http://amigo.geneontology.org/cgi-bin/amigo/term_details?term=GO:0072503
divalent inorganic cation transport	Gene Ontology	GO:0072511	2	30	0.286749	0.87561	KQ087375:1054635-1057874|KQ087375:1083141-1084855	http://amigo.geneontology.org/cgi-bin/amigo/term_details?term=GO:0072511
carboxylic acid transport	Gene Ontology	GO:0046942	2	30	0.286749	0.87561	KQ087360:2390040-2391787|KQ087360:2538058-2539986	http://amigo.geneontology.org/cgi-bin/amigo/term_details?term=GO:0046942
organic acid transmembrane transporter activity	Gene Ontology	GO:0005342	2	30	0.286749	0.87561	KQ087360:2390040-2391787|KQ087360:2538058-2539986	http://amigo.geneontology.org/cgi-bin/amigo/term_details?term=GO:0005342
nitrogen compound transport	Gene Ontology	GO:0071705	5	103	0.28755	0.87561	KQ087359:1411400-1413175|KQ087373:622241-624593|KQ087373:980127-981877|KQ087360:2538058-2539986|KQ087365:2085944-2087615	http://amigo.geneontology.org/cgi-bin/amigo/term_details?term=GO:0071705
external encapsulating structure	Gene Ontology	GO:0030312	4	78	0.28825	0.87561	KQ087367:220174-220731|KQ087362:1747125-1748285|KQ087359:225790-227494|KQ087364:854832-858221	http://amigo.geneontology.org/cgi-bin/amigo/term_details?term=GO:0030312
cation binding	Gene Ontology	GO:0043169	27	698	0.2896	0.87717	KQ087373:1095640-1096498|KQ087358:1010971-1012453|KQ087358:1033352-1034924|KQ087363:1452640-1453806|KQ087359:2188715-2190753|KQ087370:277312-277699|KQ087370:82247-83719|KQ087370:28124-30599|KQ087373:643298-644630|KQ087359:2059065-2061695|KQ087362:1157172-1159141|KQ087363:2611182-2612288|KQ087373:1051779-1053812|KQ087359:59415-61245|KQ087365:2385862-2391569|KQ087367:266419-267265|KQ087363:9602-107…	http://amigo.geneontology.org/cgi-bin/amigo/term_details?term=GO:0043169
ribonucleotide metabolic process	Gene Ontology	GO:0009259	4	79	0.295728	0.889531	KQ087362:1157172-1159141|KQ087360:1535766-1537176|KQ087363:1452640-1453806|KQ087373:896451-898001	http://amigo.geneontology.org/cgi-bin/amigo/term_details?term=GO:0009259
glutamine family amino acid metabolic process	Gene Ontology	GO:0009064	2	31	0.29913	0.889531	KQ087367:423921-426010|KQ087375:702699-704464	http://amigo.geneontology.org/cgi-bin/amigo/term_details?term=GO:0009064
divalent inorganic cation homeostasis	Gene Ontology	GO:0072507	2	31	0.29913	0.889531	KQ087375:1054635-1057874|KQ087375:1083141-1084855	http://amigo.geneontology.org/cgi-bin/amigo/term_details?term=GO:0072507
peptidase activity	Gene Ontology	GO:0008233	5	106	0.307014	0.889531	KQ087375:1026593-1028945|KQ087360:2488577-2491201|KQ087374:219550-220229|KQ087360:585536-586935|KQ087365:1666693-1668551	http://amigo.geneontology.org/cgi-bin/amigo/term_details?term=GO:0008233
austinol biosynthetic process	Gene Ontology	GO:1900560	1	10	0.309833	0.889531	KQ087370:75797-77440	http://amigo.geneontology.org/cgi-bin/amigo/term_details?term=GO:1900560
glycolytic process	Gene Ontology	GO:0006096	1	10	0.309833	0.889531	KQ087373:896451-898001	http://amigo.geneontology.org/cgi-bin/amigo/term_details?term=GO:0006096
Rho protein signal transduction	Gene Ontology	GO:0007266	1	10	0.309833	0.889531	KQ087358:2016788-2019530	http://amigo.geneontology.org/cgi-bin/amigo/term_details?term=GO:0007266
glutamine family amino acid catabolic process	Gene Ontology	GO:0009065	1	10	0.309833	0.889531	KQ087375:702699-704464	http://amigo.geneontology.org/cgi-bin/amigo/term_details?term=GO:0009065
phospholipase activity	Gene Ontology	GO:0004620	1	10	0.309833	0.889531	KQ087363:272557-274522	http://amigo.geneontology.org/cgi-bin/amigo/term_details?term=GO:0004620
gated channel activity	Gene Ontology	GO:0022836	1	10	0.309833	0.889531	KQ087359:1411400-1413175	http://amigo.geneontology.org/cgi-bin/amigo/term_details?term=GO:0022836
potassium ion transmembrane transporter activity	Gene Ontology	GO:0015079	1	10	0.309833	0.889531	KQ087375:1054635-1057874	http://amigo.geneontology.org/cgi-bin/amigo/term_details?term=GO:0015079
mismatch repair	Gene Ontology	GO:0006298	1	10	0.309833	0.889531	KQ087367:469444-472189	http://amigo.geneontology.org/cgi-bin/amigo/term_details?term=GO:0006298
carbohydrate kinase activity	Gene Ontology	GO:0019200	1	10	0.309833	0.889531	KQ087373:896451-898001	http://amigo.geneontology.org/cgi-bin/amigo/term_details?term=GO:0019200
transcription factor import into nucleus	Gene Ontology	GO:0042991	1	10	0.309833	0.889531	KQ087368:347994-348672	http://amigo.geneontology.org/cgi-bin/amigo/term_details?term=GO:0042991
austinol metabolic process	Gene Ontology	GO:1900558	1	10	0.309833	0.889531	KQ087370:75797-77440	http://amigo.geneontology.org/cgi-bin/amigo/term_details?term=GO:1900558
cytoplasmic sequestering of protein	Gene Ontology	GO:0051220	1	10	0.309833	0.889531	KQ087368:347994-348672	http://amigo.geneontology.org/cgi-bin/amigo/term_details?term=GO:0051220
ATP generation from ADP	Gene Ontology	GO:0006757	1	10	0.309833	0.889531	KQ087373:896451-898001	http://amigo.geneontology.org/cgi-bin/amigo/term_details?term=GO:0006757
organic anion transport	Gene Ontology	GO:0015711	2	32	0.311477	0.889531	KQ087360:2390040-2391787|KQ087360:2538058-2539986	http://amigo.geneontology.org/cgi-bin/amigo/term_details?term=GO:0015711
tetrapyrrole binding	Gene Ontology	GO:0046906	5	107	0.313545	0.889531	KQ087373:434260-436619|KQ087365:2385862-2391569|KQ087358:1033352-1034924|KQ087359:31525-33642|KQ087370:82247-83719	http://amigo.geneontology.org/cgi-bin/amigo/term_details?term=GO:0046906
heme binding	Gene Ontology	GO:0020037	5	107	0.313545	0.889531	KQ087373:434260-436619|KQ087365:2385862-2391569|KQ087358:1033352-1034924|KQ087359:31525-33642|KQ087370:82247-83719	http://amigo.geneontology.org/cgi-bin/amigo/term_details?term=GO:0020037
purine nucleoside monophosphate metabolic process	Gene Ontology	GO:0009126	3	57	0.319943	0.889531	KQ087362:1157172-1159141|KQ087363:1452640-1453806|KQ087373:896451-898001	http://amigo.geneontology.org/cgi-bin/amigo/term_details?term=GO:0009126
energy derivation by oxidation of organic compounds	Gene Ontology	GO:0015980	3	57	0.319943	0.889531	KQ087362:1157172-1159141|KQ087363:1452640-1453806|KQ087373:896451-898001	http://amigo.geneontology.org/cgi-bin/amigo/term_details?term=GO:0015980
purine ribonucleoside monophosphate metabolic process	Gene Ontology	GO:0009167	3	57	0.319943	0.889531	KQ087362:1157172-1159141|KQ087363:1452640-1453806|KQ087373:896451-898001	http://amigo.geneontology.org/cgi-bin/amigo/term_details?term=GO:0009167
substrate-specific transporter activity	Gene Ontology	GO:0022892	11	268	0.320333	0.889531	KQ087367:1577327-1579154|KQ087373:622241-624593|KQ087373:980127-981877|KQ087370:368885-370011|KQ087359:1411400-1413175|KQ087360:2390040-2391787|KQ087375:1054635-1057874|KQ087365:2085944-2087615|KQ087375:1083141-1084855|KQ087360:2538058-2539986|KQ087373:480236-483672	http://amigo.geneontology.org/cgi-bin/amigo/term_details?term=GO:0022892
ribonuclease activity	Gene Ontology	GO:0004540	2	33	0.323777	0.889531	KQ087363:1649213-1649693|KQ087365:1755454-1755916	http://amigo.geneontology.org/cgi-bin/amigo/term_details?term=GO:0004540
hyphal cell wall	Gene Ontology	GO:0030446	2	33	0.323777	0.889531	KQ087359:225790-227494|KQ087362:1747125-1748285	http://amigo.geneontology.org/cgi-bin/amigo/term_details?term=GO:0030446
pentose-phosphate shunt	Gene Ontology	GO:0006098	1	11	0.332725	0.889531	KQ087358:774516-776073	http://amigo.geneontology.org/cgi-bin/amigo/term_details?term=GO:0006098
transcription coactivator activity	Gene Ontology	GO:0003713	1	11	0.332725	0.889531	KQ087368:351403-352769	http://amigo.geneontology.org/cgi-bin/amigo/term_details?term=GO:0003713
glyceraldehyde-3-phosphate metabolic process	Gene Ontology	GO:0019682	1	11	0.332725	0.889531	KQ087358:774516-776073	http://amigo.geneontology.org/cgi-bin/amigo/term_details?term=GO:0019682
negative regulation of phosphorylation	Gene Ontology	GO:0042326	1	11	0.332725	0.889531	KQ087359:370703-371359	http://amigo.geneontology.org/cgi-bin/amigo/term_details?term=GO:0042326
aspartic-type endopeptidase activity	Gene Ontology	GO:0004190	1	11	0.332725	0.889531	KQ087360:585536-586935	http://amigo.geneontology.org/cgi-bin/amigo/term_details?term=GO:0004190
protein secretion	Gene Ontology	GO:0009306	1	11	0.332725	0.889531	KQ087359:370703-371359	http://amigo.geneontology.org/cgi-bin/amigo/term_details?term=GO:0009306
membrane region	Gene Ontology	GO:0098589	1	11	0.332725	0.889531	KQ087359:370703-371359	http://amigo.geneontology.org/cgi-bin/amigo/term_details?term=GO:0098589
aspartic-type peptidase activity	Gene Ontology	GO:0070001	1	11	0.332725	0.889531	KQ087360:585536-586935	http://amigo.geneontology.org/cgi-bin/amigo/term_details?term=GO:0070001
dehydroaustinol biosynthetic process	Gene Ontology	GO:1900563	1	11	0.332725	0.889531	KQ087370:75797-77440	http://amigo.geneontology.org/cgi-bin/amigo/term_details?term=GO:1900563
protein localization to cell periphery	Gene Ontology	GO:1990778	1	11	0.332725	0.889531	KQ087359:370703-371359	http://amigo.geneontology.org/cgi-bin/amigo/term_details?term=GO:1990778
amide transmembrane transporter activity	Gene Ontology	GO:0042887	1	11	0.332725	0.889531	KQ087373:622241-624593	http://amigo.geneontology.org/cgi-bin/amigo/term_details?term=GO:0042887
mitochondrial respiratory chain complex IV biogenesis	Gene Ontology	GO:0097034	1	11	0.332725	0.889531	KQ087361:67268-68159	http://amigo.geneontology.org/cgi-bin/amigo/term_details?term=GO:0097034
negative regulation of protein phosphorylation	Gene Ontology	GO:0001933	1	11	0.332725	0.889531	KQ087359:370703-371359	http://amigo.geneontology.org/cgi-bin/amigo/term_details?term=GO:0001933
mitochondrial respiratory chain complex IV assembly	Gene Ontology	GO:0033617	1	11	0.332725	0.889531	KQ087361:67268-68159	http://amigo.geneontology.org/cgi-bin/amigo/term_details?term=GO:0033617
intrinsic component of mitochondrial inner membrane	Gene Ontology	GO:0031304	1	11	0.332725	0.889531	KQ087361:67268-68159	http://amigo.geneontology.org/cgi-bin/amigo/term_details?term=GO:0031304
dehydroaustinol metabolic process	Gene Ontology	GO:1900561	1	11	0.332725	0.889531	KQ087370:75797-77440	http://amigo.geneontology.org/cgi-bin/amigo/term_details?term=GO:1900561
integral component of mitochondrial inner membrane	Gene Ontology	GO:0031305	1	11	0.332725	0.889531	KQ087361:67268-68159	http://amigo.geneontology.org/cgi-bin/amigo/term_details?term=GO:0031305
potassium ion transport	Gene Ontology	GO:0006813	1	11	0.332725	0.889531	KQ087375:1054635-1057874	http://amigo.geneontology.org/cgi-bin/amigo/term_details?term=GO:0006813
alpha-amino acid catabolic process	Gene Ontology	GO:1901606	2	34	0.33602	0.889554	KQ087363:1452640-1453806|KQ087375:702699-704464	http://amigo.geneontology.org/cgi-bin/amigo/term_details?term=GO:1901606
polyol metabolic process	Gene Ontology	GO:0019751	2	34	0.33602	0.889554	KQ087358:1712792-1714043|KQ087359:225790-227494	http://amigo.geneontology.org/cgi-bin/amigo/term_details?term=GO:0019751
pyridoxal phosphate binding	Gene Ontology	GO:0030170	3	59	0.338236	0.889554	KQ087367:423921-426010|KQ087369:836595-837678|KQ087358:1013167-1014595	http://amigo.geneontology.org/cgi-bin/amigo/term_details?term=GO:0030170
ketone biosynthetic process	Gene Ontology	GO:0042181	3	59	0.338236	0.889554	KQ087368:348761-349952|KQ087368:346783-347575|KQ087368:351403-352769	http://amigo.geneontology.org/cgi-bin/amigo/term_details?term=GO:0042181
response to abiotic stimulus	Gene Ontology	GO:0009628	7	164	0.338726	0.889554	KQ087367:547555-549291|KQ087374:229954-230815|KQ087365:2159709-2160555|KQ087370:368885-370011|KQ087364:854832-858221|KQ087373:434260-436619|KQ087369:435390-436842	http://amigo.geneontology.org/cgi-bin/amigo/term_details?term=GO:0009628
response to chemical	Gene Ontology	GO:0042221	15	383	0.340779	0.889554	KQ087367:547555-549291|KQ087374:229954-230815|KQ087376:132644-133020|KQ087365:2159709-2160555|KQ087361:486265-487081|KQ087364:854832-858221|KQ087373:434260-436619|KQ087369:435390-436842|KQ087365:2085944-2087615|KQ087358:1035226-1036289|KQ087360:2538058-2539986|KQ087364:892758-894251|KQ087366:346161-347511|KQ087368:347994-348672|KQ087375:702699-704464	http://amigo.geneontology.org/cgi-bin/amigo/term_details?term=GO:0042221
ribonucleoside monophosphate metabolic process	Gene Ontology	GO:0009161	3	60	0.347375	0.889554	KQ087362:1157172-1159141|KQ087363:1452640-1453806|KQ087373:896451-898001	http://amigo.geneontology.org/cgi-bin/amigo/term_details?term=GO:0009161
aspartate family amino acid metabolic process	Gene Ontology	GO:0009066	2	35	0.348198	0.889554	KQ087376:132644-133020|KQ087363:1452640-1453806	http://amigo.geneontology.org/cgi-bin/amigo/term_details?term=GO:0009066
regulation of cellular ketone metabolic process	Gene Ontology	GO:0010565	2	35	0.348198	0.889554	KQ087368:348761-349952|KQ087368:351403-352769	http://amigo.geneontology.org/cgi-bin/amigo/term_details?term=GO:0010565
cellular amino acid catabolic process	Gene Ontology	GO:0009063	2	35	0.348198	0.889554	KQ087363:1452640-1453806|KQ087375:702699-704464	http://amigo.geneontology.org/cgi-bin/amigo/term_details?term=GO:0009063
phosphopantetheine binding	Gene Ontology	GO:0031177	2	35	0.348198	0.889554	KQ087358:1016612-1023117|KQ087358:1003501-1007320	http://amigo.geneontology.org/cgi-bin/amigo/term_details?term=GO:0031177
small molecule catabolic process	Gene Ontology	GO:0044282	5	113	0.353048	0.889554	KQ087375:702699-704464|KQ087373:518820-520652|KQ087368:22419-24214|KQ087363:1452640-1453806|KQ087360:1268336-1269852	http://amigo.geneontology.org/cgi-bin/amigo/term_details?term=GO:0044282
ion transmembrane transporter activity	Gene Ontology	GO:0015075	6	140	0.354763	0.889554	KQ087370:368885-370011|KQ087359:1411400-1413175|KQ087375:1054635-1057874|KQ087375:1083141-1084855|KQ087360:2538058-2539986|KQ087373:480236-483672	http://amigo.geneontology.org/cgi-bin/amigo/term_details?term=GO:0015075
negative regulation of sexual sporulation resulting in formation of a cellular spore	Gene Ontology	GO:0043942	1	12	0.35486	0.889554	KQ087364:987665-989053	http://amigo.geneontology.org/cgi-bin/amigo/term_details?term=GO:0043942
nucleoside diphosphate phosphorylation	Gene Ontology	GO:0006165	1	12	0.35486	0.889554	KQ087373:896451-898001	http://amigo.geneontology.org/cgi-bin/amigo/term_details?term=GO:0006165
retrograde vesicle-mediated transport, Golgi to ER	Gene Ontology	GO:0006890	1	12	0.35486	0.889554	KQ087376:132644-133020	http://amigo.geneontology.org/cgi-bin/amigo/term_details?term=GO:0006890
respiratory chain complex IV assembly	Gene Ontology	GO:0008535	1	12	0.35486	0.889554	KQ087361:67268-68159	http://amigo.geneontology.org/cgi-bin/amigo/term_details?term=GO:0008535
xylan metabolic process	Gene Ontology	GO:0045491	1	12	0.35486	0.889554	KQ087360:999535-1000354	http://amigo.geneontology.org/cgi-bin/amigo/term_details?term=GO:0045491
plasma membrane organization	Gene Ontology	GO:0007009	1	12	0.35486	0.889554	KQ087359:370703-371359	http://amigo.geneontology.org/cgi-bin/amigo/term_details?term=GO:0007009
xylan catabolic process	Gene Ontology	GO:0045493	1	12	0.35486	0.889554	KQ087360:999535-1000354	http://amigo.geneontology.org/cgi-bin/amigo/term_details?term=GO:0045493
sulfur compound transport	Gene Ontology	GO:0072348	1	12	0.35486	0.889554	KQ087373:622241-624593	http://amigo.geneontology.org/cgi-bin/amigo/term_details?term=GO:0072348
substrate-specific channel activity	Gene Ontology	GO:0022838	1	12	0.35486	0.889554	KQ087370:368885-370011	http://amigo.geneontology.org/cgi-bin/amigo/term_details?term=GO:0022838
ion channel activity	Gene Ontology	GO:0005216	1	12	0.35486	0.889554	KQ087370:368885-370011	http://amigo.geneontology.org/cgi-bin/amigo/term_details?term=GO:0005216
glutathione metabolic process	Gene Ontology	GO:0006749	1	12	0.35486	0.889554	KQ087376:132644-133020	http://amigo.geneontology.org/cgi-bin/amigo/term_details?term=GO:0006749
positive regulation of sterigmatocystin biosynthetic process	Gene Ontology	GO:0010914	1	12	0.35486	0.889554	KQ087368:348761-349952	http://amigo.geneontology.org/cgi-bin/amigo/term_details?term=GO:0010914
polyketide biosynthetic process	Gene Ontology	GO:0030639	1	12	0.35486	0.889554	KQ087360:171314-172508	http://amigo.geneontology.org/cgi-bin/amigo/term_details?term=GO:0030639
nucleoside metabolic process	Gene Ontology	GO:0009116	4	87	0.356158	0.889554	KQ087362:1157172-1159141|KQ087360:1535766-1537176|KQ087363:1452640-1453806|KQ087373:896451-898001	http://amigo.geneontology.org/cgi-bin/amigo/term_details?term=GO:0009116
isomerase activity	Gene Ontology	GO:0016853	3	61	0.356501	0.889554	KQ087358:1680543-1681945|KQ087368:410167-412357|KQ087359:225790-227494	http://amigo.geneontology.org/cgi-bin/amigo/term_details?term=GO:0016853
cation-transporting ATPase activity	Gene Ontology	GO:0019829	2	36	0.360299	0.892657	KQ087375:1054635-1057874|KQ087373:480236-483672	http://amigo.geneontology.org/cgi-bin/amigo/term_details?term=GO:0019829
transcription factor activity, transcription factor binding	Gene Ontology	GO:0000989	2	36	0.360299	0.892657	KQ087368:347994-348672|KQ087368:351403-352769	http://amigo.geneontology.org/cgi-bin/amigo/term_details?term=GO:0000989
ATPase coupled ion transmembrane transporter activity	Gene Ontology	GO:0042625	2	36	0.360299	0.892657	KQ087375:1054635-1057874|KQ087373:480236-483672	http://amigo.geneontology.org/cgi-bin/amigo/term_details?term=GO:0042625
nucleoside monophosphate metabolic process	Gene Ontology	GO:0009123	3	62	0.36561	0.896191	KQ087362:1157172-1159141|KQ087363:1452640-1453806|KQ087373:896451-898001	http://amigo.geneontology.org/cgi-bin/amigo/term_details?term=GO:0009123
nucleic acid binding transcription factor activity	Gene Ontology	GO:0001071	9	224	0.367209	0.896191	KQ087374:229954-230815|KQ087358:1010971-1012453|KQ087373:1051779-1053812|KQ087363:358458-359253|KQ087359:59415-61245|KQ087359:2188715-2190753|KQ087368:348761-349952|KQ087370:28124-30599|KQ087367:266419-267265	http://amigo.geneontology.org/cgi-bin/amigo/term_details?term=GO:0001071
transcription factor activity, sequence-specific DNA binding	Gene Ontology	GO:0003700	9	224	0.367209	0.896191	KQ087374:229954-230815|KQ087358:1010971-1012453|KQ087373:1051779-1053812|KQ087363:358458-359253|KQ087359:59415-61245|KQ087359:2188715-2190753|KQ087368:348761-349952|KQ087370:28124-30599|KQ087367:266419-267265	http://amigo.geneontology.org/cgi-bin/amigo/term_details?term=GO:0003700
polyketide metabolic process	Gene Ontology	GO:0030638	1	13	0.376263	0.896191	KQ087360:171314-172508	http://amigo.geneontology.org/cgi-bin/amigo/term_details?term=GO:0030638
carbohydrate homeostasis	Gene Ontology	GO:0033500	1	13	0.376263	0.896191	KQ087373:896451-898001	http://amigo.geneontology.org/cgi-bin/amigo/term_details?term=GO:0033500
periplasmic space	Gene Ontology	GO:0042597	1	13	0.376263	0.896191	KQ087364:854832-858221	http://amigo.geneontology.org/cgi-bin/amigo/term_details?term=GO:0042597
glucose homeostasis	Gene Ontology	GO:0042593	1	13	0.376263	0.896191	KQ087373:896451-898001	http://amigo.geneontology.org/cgi-bin/amigo/term_details?term=GO:0042593
calcium ion transmembrane transporter activity	Gene Ontology	GO:0015085	1	13	0.376263	0.896191	KQ087375:1054635-1057874	http://amigo.geneontology.org/cgi-bin/amigo/term_details?term=GO:0015085
asperthecin biosynthetic process	Gene Ontology	GO:0036184	1	13	0.376263	0.896191	KQ087368:348761-349952	http://amigo.geneontology.org/cgi-bin/amigo/term_details?term=GO:0036184
peptide transport	Gene Ontology	GO:0015833	1	13	0.376263	0.896191	KQ087373:622241-624593	http://amigo.geneontology.org/cgi-bin/amigo/term_details?term=GO:0015833
growing cell tip	Gene Ontology	GO:0035838	1	13	0.376263	0.896191	KQ087359:370703-371359	http://amigo.geneontology.org/cgi-bin/amigo/term_details?term=GO:0035838
endoribonuclease activity, producing 5'-phosphomonoesters	Gene Ontology	GO:0016891	1	13	0.376263	0.896191	KQ087363:1649213-1649693	http://amigo.geneontology.org/cgi-bin/amigo/term_details?term=GO:0016891
alcohol catabolic process	Gene Ontology	GO:0046164	1	13	0.376263	0.896191	KQ087363:1452640-1453806	http://amigo.geneontology.org/cgi-bin/amigo/term_details?term=GO:0046164
cellular glucose homeostasis	Gene Ontology	GO:0001678	1	13	0.376263	0.896191	KQ087373:896451-898001	http://amigo.geneontology.org/cgi-bin/amigo/term_details?term=GO:0001678
triglyceride lipase activity	Gene Ontology	GO:0004806	1	13	0.376263	0.896191	KQ087369:405505-406575	http://amigo.geneontology.org/cgi-bin/amigo/term_details?term=GO:0004806
xanthone-containing compound biosynthetic process	Gene Ontology	GO:2001307	1	13	0.376263	0.896191	KQ087368:346783-347575	http://amigo.geneontology.org/cgi-bin/amigo/term_details?term=GO:2001307
NADP metabolic process	Gene Ontology	GO:0006739	1	13	0.376263	0.896191	KQ087358:774516-776073	http://amigo.geneontology.org/cgi-bin/amigo/term_details?term=GO:0006739
glycosyl compound metabolic process	Gene Ontology	GO:1901657	4	90	0.378894	0.90041	KQ087362:1157172-1159141|KQ087360:1535766-1537176|KQ087363:1452640-1453806|KQ087373:896451-898001	http://amigo.geneontology.org/cgi-bin/amigo/term_details?term=GO:1901657
iron ion binding	Gene Ontology	GO:0005506	5	118	0.386152	0.904375	KQ087373:643298-644630|KQ087365:2385862-2391569|KQ087358:1033352-1034924|KQ087373:1095640-1096498|KQ087370:82247-83719	http://amigo.geneontology.org/cgi-bin/amigo/term_details?term=GO:0005506
purine-containing compound metabolic process	Gene Ontology	GO:0072521	4	91	0.386458	0.904375	KQ087362:1157172-1159141|KQ087360:1535766-1537176|KQ087363:1452640-1453806|KQ087373:896451-898001	http://amigo.geneontology.org/cgi-bin/amigo/term_details?term=GO:0072521
RNA polymerase II transcription factor activity, sequence-specific DNA binding	Gene Ontology	GO:0000981	7	173	0.38767	0.904375	KQ087358:1010971-1012453|KQ087373:1051779-1053812|KQ087359:59415-61245|KQ087359:2188715-2190753|KQ087368:348761-349952|KQ087370:28124-30599|KQ087367:266419-267265	http://amigo.geneontology.org/cgi-bin/amigo/term_details?term=GO:0000981
cellular catabolic process	Gene Ontology	GO:0044248	13	342	0.395782	0.904375	KQ087363:272557-274522|KQ087375:1026593-1028945|KQ087376:132644-133020|KQ087373:518820-520652|KQ087363:1452640-1453806|KQ087364:854832-858221|KQ087367:218267-220072|KQ087371:205036-207990|KQ087369:804966-806718|KQ087367:1442764-1444280|KQ087368:22419-24214|KQ087375:702699-704464|KQ087360:1268336-1269852	http://amigo.geneontology.org/cgi-bin/amigo/term_details?term=GO:0044248
modified amino acid binding	Gene Ontology	GO:0072341	2	39	0.396072	0.904375	KQ087358:1016612-1023117|KQ087358:1003501-1007320	http://amigo.geneontology.org/cgi-bin/amigo/term_details?term=GO:0072341
negative regulation of filamentous growth of a population of unicellular organisms	Gene Ontology	GO:1900429	1	14	0.396959	0.904375	KQ087376:132644-133020	http://amigo.geneontology.org/cgi-bin/amigo/term_details?term=GO:1900429
phosphate transmembrane transporter activity	Gene Ontology	GO:1901677	1	14	0.396959	0.904375	KQ087369:796405-798362	http://amigo.geneontology.org/cgi-bin/amigo/term_details?term=GO:1901677
alditol metabolic process	Gene Ontology	GO:0019400	1	14	0.396959	0.904375	KQ087358:1712792-1714043	http://amigo.geneontology.org/cgi-bin/amigo/term_details?term=GO:0019400
regulation of nucleocytoplasmic transport	Gene Ontology	GO:0046822	1	14	0.396959	0.904375	KQ087368:347994-348672	http://amigo.geneontology.org/cgi-bin/amigo/term_details?term=GO:0046822
disulfide oxidoreductase activity	Gene Ontology	GO:0015036	1	14	0.396959	0.904375	KQ087376:132644-133020	http://amigo.geneontology.org/cgi-bin/amigo/term_details?term=GO:0015036
xanthone-containing compound metabolic process	Gene Ontology	GO:2001305	1	14	0.396959	0.904375	KQ087368:346783-347575	http://amigo.geneontology.org/cgi-bin/amigo/term_details?term=GO:2001305
calcium ion transport	Gene Ontology	GO:0006816	1	14	0.396959	0.904375	KQ087375:1054635-1057874	http://amigo.geneontology.org/cgi-bin/amigo/term_details?term=GO:0006816
asperthecin metabolic process	Gene Ontology	GO:0036182	1	14	0.396959	0.904375	KQ087368:348761-349952	http://amigo.geneontology.org/cgi-bin/amigo/term_details?term=GO:0036182
protein disulfide oxidoreductase activity	Gene Ontology	GO:0015035	1	14	0.396959	0.904375	KQ087376:132644-133020	http://amigo.geneontology.org/cgi-bin/amigo/term_details?term=GO:0015035
positive regulation of sulfur metabolic process	Gene Ontology	GO:0051176	1	14	0.396959	0.904375	KQ087358:1010971-1012453	http://amigo.geneontology.org/cgi-bin/amigo/term_details?term=GO:0051176
negative regulation of filamentous growth	Gene Ontology	GO:0060258	1	14	0.396959	0.904375	KQ087376:132644-133020	http://amigo.geneontology.org/cgi-bin/amigo/term_details?term=GO:0060258
terpenoid biosynthetic process	Gene Ontology	GO:0016114	1	14	0.396959	0.904375	KQ087368:410167-412357	http://amigo.geneontology.org/cgi-bin/amigo/term_details?term=GO:0016114
regulation of protein localization to nucleus	Gene Ontology	GO:1900180	1	14	0.396959	0.904375	KQ087368:347994-348672	http://amigo.geneontology.org/cgi-bin/amigo/term_details?term=GO:1900180
cofactor metabolic process	Gene Ontology	GO:0051186	6	148	0.402385	0.90849	KQ087367:547555-549291|KQ087362:1157172-1159141|KQ087363:1452640-1453806|KQ087368:348761-349952|KQ087373:896451-898001|KQ087358:774516-776073	http://amigo.geneontology.org/cgi-bin/amigo/term_details?term=GO:0051186
small molecule binding	Gene Ontology	GO:0036094	28	771	0.406199	0.90849	KQ087373:546729-548769|KQ087369:843849-845735|KQ087359:2263883-2266350|KQ087367:1199056-1200381|KQ087365:557223-558575|KQ087363:141459-146109|KQ087369:814467-815786|KQ087362:1157172-1159141|KQ087362:1972584-1974621|KQ087374:65712-68033|KQ087362:3076957-3078700|KQ087358:1003501-1007320|KQ087365:2354054-2355609|KQ087358:774516-776073|KQ087363:575562-576797|KQ087373:541958-546058|KQ087375:1054635-10…	http://amigo.geneontology.org/cgi-bin/amigo/term_details?term=GO:0036094
active ion transmembrane transporter activity	Gene Ontology	GO:0022853	2	40	0.407794	0.90849	KQ087375:1054635-1057874|KQ087373:480236-483672	http://amigo.geneontology.org/cgi-bin/amigo/term_details?term=GO:0022853
secondary active transmembrane transporter activity	Gene Ontology	GO:0015291	2	40	0.407794	0.90849	KQ087359:1411400-1413175|KQ087369:796405-798362	http://amigo.geneontology.org/cgi-bin/amigo/term_details?term=GO:0015291
transcription factor activity, protein binding	Gene Ontology	GO:0000988	2	40	0.407794	0.90849	KQ087368:347994-348672|KQ087368:351403-352769	http://amigo.geneontology.org/cgi-bin/amigo/term_details?term=GO:0000988
monooxygenase activity	Gene Ontology	GO:0004497	2	40	0.407794	0.90849	KQ087358:1033352-1034924|KQ087374:210259-212568	http://amigo.geneontology.org/cgi-bin/amigo/term_details?term=GO:0004497
dioxygenase activity	Gene Ontology	GO:0051213	2	40	0.407794	0.90849	KQ087370:220220-222513|KQ087373:643298-644630	http://amigo.geneontology.org/cgi-bin/amigo/term_details?term=GO:0051213
metal ion binding	Gene Ontology	GO:0046872	25	689	0.416466	0.90849	KQ087373:1095640-1096498|KQ087358:1010971-1012453|KQ087358:1033352-1034924|KQ087363:1452640-1453806|KQ087359:2188715-2190753|KQ087370:277312-277699|KQ087370:82247-83719|KQ087370:28124-30599|KQ087373:643298-644630|KQ087359:2059065-2061695|KQ087362:1157172-1159141|KQ087363:2611182-2612288|KQ087373:1051779-1053812|KQ087359:59415-61245|KQ087365:2385862-2391569|KQ087367:266419-267265|KQ087363:9602-107…	http://amigo.geneontology.org/cgi-bin/amigo/term_details?term=GO:0046872
electron carrier activity	Gene Ontology	GO:0009055	4	95	0.416577	0.90849	KQ087365:2385862-2391569|KQ087376:132644-133020|KQ087358:1033352-1034924|KQ087370:82247-83719	http://amigo.geneontology.org/cgi-bin/amigo/term_details?term=GO:0009055
negative regulation of protein modification process	Gene Ontology	GO:0031400	1	15	0.416969	0.90849	KQ087359:370703-371359	http://amigo.geneontology.org/cgi-bin/amigo/term_details?term=GO:0031400
maintenance of protein location in cell	Gene Ontology	GO:0032507	1	15	0.416969	0.90849	KQ087368:347994-348672	http://amigo.geneontology.org/cgi-bin/amigo/term_details?term=GO:0032507
terpenoid metabolic process	Gene Ontology	GO:0006721	1	15	0.416969	0.90849	KQ087368:410167-412357	http://amigo.geneontology.org/cgi-bin/amigo/term_details?term=GO:0006721
nitrogen utilization	Gene Ontology	GO:0019740	1	15	0.416969	0.90849	KQ087368:347994-348672	http://amigo.geneontology.org/cgi-bin/amigo/term_details?term=GO:0019740
maintenance of protein location	Gene Ontology	GO:0045185	1	15	0.416969	0.90849	KQ087368:347994-348672	http://amigo.geneontology.org/cgi-bin/amigo/term_details?term=GO:0045185
acetyl-CoA metabolic process	Gene Ontology	GO:0006084	1	15	0.416969	0.90849	KQ087367:547555-549291	http://amigo.geneontology.org/cgi-bin/amigo/term_details?term=GO:0006084
negative regulation of growth	Gene Ontology	GO:0045926	1	15	0.416969	0.90849	KQ087376:132644-133020	http://amigo.geneontology.org/cgi-bin/amigo/term_details?term=GO:0045926
response to toxic substance	Gene Ontology	GO:0009636	1	15	0.416969	0.90849	KQ087358:1035226-1036289	http://amigo.geneontology.org/cgi-bin/amigo/term_details?term=GO:0009636
organic hydroxy compound catabolic process	Gene Ontology	GO:1901616	1	15	0.416969	0.90849	KQ087363:1452640-1453806	http://amigo.geneontology.org/cgi-bin/amigo/term_details?term=GO:1901616
reactive oxygen species metabolic process	Gene Ontology	GO:0072593	1	15	0.416969	0.90849	KQ087376:132644-133020	http://amigo.geneontology.org/cgi-bin/amigo/term_details?term=GO:0072593
vacuole fusion, non-autophagic	Gene Ontology	GO:0042144	1	15	0.416969	0.90849	KQ087376:132644-133020	http://amigo.geneontology.org/cgi-bin/amigo/term_details?term=GO:0042144
carbohydrate transport	Gene Ontology	GO:0008643	1	15	0.416969	0.90849	KQ087373:896451-898001	http://amigo.geneontology.org/cgi-bin/amigo/term_details?term=GO:0008643
endonuclease activity	Gene Ontology	GO:0004519	2	41	0.419406	0.910586	KQ087363:1649213-1649693|KQ087365:1755454-1755916	http://amigo.geneontology.org/cgi-bin/amigo/term_details?term=GO:0004519
generation of precursor metabolites and energy	Gene Ontology	GO:0006091	3	68	0.419669	0.910586	KQ087362:1157172-1159141|KQ087363:1452640-1453806|KQ087373:896451-898001	http://amigo.geneontology.org/cgi-bin/amigo/term_details?term=GO:0006091
organophosphate catabolic process	Gene Ontology	GO:0046434	1	16	0.436317	0.929391	KQ087363:272557-274522	http://amigo.geneontology.org/cgi-bin/amigo/term_details?term=GO:0046434
cellular amide catabolic process	Gene Ontology	GO:0043605	1	16	0.436317	0.929391	KQ087373:518820-520652	http://amigo.geneontology.org/cgi-bin/amigo/term_details?term=GO:0043605
nucleotide phosphorylation	Gene Ontology	GO:0046939	1	16	0.436317	0.929391	KQ087373:896451-898001	http://amigo.geneontology.org/cgi-bin/amigo/term_details?term=GO:0046939
regulation of intracellular protein transport	Gene Ontology	GO:0033157	1	16	0.436317	0.929391	KQ087368:347994-348672	http://amigo.geneontology.org/cgi-bin/amigo/term_details?term=GO:0033157
cytochrome complex assembly	Gene Ontology	GO:0017004	1	16	0.436317	0.929391	KQ087361:67268-68159	http://amigo.geneontology.org/cgi-bin/amigo/term_details?term=GO:0017004
negative regulation of phosphorus metabolic process	Gene Ontology	GO:0010563	1	16	0.436317	0.929391	KQ087359:370703-371359	http://amigo.geneontology.org/cgi-bin/amigo/term_details?term=GO:0010563
negative regulation of phosphate metabolic process	Gene Ontology	GO:0045936	1	16	0.436317	0.929391	KQ087359:370703-371359	http://amigo.geneontology.org/cgi-bin/amigo/term_details?term=GO:0045936
vacuole fusion	Gene Ontology	GO:0097576	1	16	0.436317	0.929391	KQ087376:132644-133020	http://amigo.geneontology.org/cgi-bin/amigo/term_details?term=GO:0097576
inorganic anion transmembrane transporter activity	Gene Ontology	GO:0015103	1	16	0.436317	0.929391	KQ087359:1411400-1413175	http://amigo.geneontology.org/cgi-bin/amigo/term_details?term=GO:0015103
sequence-specific DNA binding	Gene Ontology	GO:0043565	4	98	0.438951	0.933104	KQ087363:358458-359253|KQ087368:348761-349952|KQ087374:229954-230815|KQ087359:59415-61245	http://amigo.geneontology.org/cgi-bin/amigo/term_details?term=GO:0043565
nucleotide metabolic process	Gene Ontology	GO:0009117	5	127	0.445373	0.944841	KQ087358:774516-776073|KQ087362:1157172-1159141|KQ087360:1535766-1537176|KQ087363:1452640-1453806|KQ087373:896451-898001	http://amigo.geneontology.org/cgi-bin/amigo/term_details?term=GO:0009117
carboxylic ester hydrolase activity	Gene Ontology	GO:0052689	2	44	0.45352	0.946164	KQ087369:405505-406575|KQ087360:999535-1000354	http://amigo.geneontology.org/cgi-bin/amigo/term_details?term=GO:0052689
cellular metabolic compound salvage	Gene Ontology	GO:0043094	1	17	0.455025	0.946164	KQ087376:132644-133020	http://amigo.geneontology.org/cgi-bin/amigo/term_details?term=GO:0043094
amino acid transport	Gene Ontology	GO:0006865	1	17	0.455025	0.946164	KQ087360:2538058-2539986	http://amigo.geneontology.org/cgi-bin/amigo/term_details?term=GO:0006865
carbon-sulfur lyase activity	Gene Ontology	GO:0016846	1	17	0.455025	0.946164	KQ087358:1013167-1014595	http://amigo.geneontology.org/cgi-bin/amigo/term_details?term=GO:0016846
cellular aldehyde metabolic process	Gene Ontology	GO:0006081	1	17	0.455025	0.946164	KQ087358:774516-776073	http://amigo.geneontology.org/cgi-bin/amigo/term_details?term=GO:0006081
aminopeptidase activity	Gene Ontology	GO:0004177	1	17	0.455025	0.946164	KQ087375:1026593-1028945	http://amigo.geneontology.org/cgi-bin/amigo/term_details?term=GO:0004177
polyol biosynthetic process	Gene Ontology	GO:0046173	1	17	0.455025	0.946164	KQ087359:225790-227494	http://amigo.geneontology.org/cgi-bin/amigo/term_details?term=GO:0046173
acyl-CoA metabolic process	Gene Ontology	GO:0006637	1	17	0.455025	0.946164	KQ087367:547555-549291	http://amigo.geneontology.org/cgi-bin/amigo/term_details?term=GO:0006637
thioester metabolic process	Gene Ontology	GO:0035383	1	17	0.455025	0.946164	KQ087367:547555-549291	http://amigo.geneontology.org/cgi-bin/amigo/term_details?term=GO:0035383
cellular response to chemical stimulus	Gene Ontology	GO:0070887	12	329	0.457427	0.949275	KQ087374:229954-230815|KQ087376:132644-133020|KQ087365:2159709-2160555|KQ087361:486265-487081|KQ087364:854832-858221|KQ087373:434260-436619|KQ087365:2085944-2087615|KQ087358:1035226-1036289|KQ087360:2538058-2539986|KQ087364:892758-894251|KQ087369:435390-436842|KQ087375:702699-704464	http://amigo.geneontology.org/cgi-bin/amigo/term_details?term=GO:0070887
trehalose metabolic process	Gene Ontology	GO:0005991	1	18	0.473115	0.964638	KQ087364:854832-858221	http://amigo.geneontology.org/cgi-bin/amigo/term_details?term=GO:0005991
modification of morphology or physiology of other organism	Gene Ontology	GO:0035821	1	18	0.473115	0.964638	KQ087365:1881927-1882409	http://amigo.geneontology.org/cgi-bin/amigo/term_details?term=GO:0035821
negative regulation of cell differentiation	Gene Ontology	GO:0045596	1	18	0.473115	0.964638	KQ087364:987665-989053	http://amigo.geneontology.org/cgi-bin/amigo/term_details?term=GO:0045596
modification of morphology or physiology of other organism involved in symbiotic interaction	Gene Ontology	GO:0051817	1	18	0.473115	0.964638	KQ087365:1881927-1882409	http://amigo.geneontology.org/cgi-bin/amigo/term_details?term=GO:0051817
amino acid transmembrane transporter activity	Gene Ontology	GO:0015171	1	18	0.473115	0.964638	KQ087360:2538058-2539986	http://amigo.geneontology.org/cgi-bin/amigo/term_details?term=GO:0015171
serine-type endopeptidase activity	Gene Ontology	GO:0004252	1	18	0.473115	0.964638	KQ087365:1666693-1668551	http://amigo.geneontology.org/cgi-bin/amigo/term_details?term=GO:0004252
endonuclease activity, active with either ribo- or deoxyribonucleic acids and producing 5'-phosphomonoesters	Gene Ontology	GO:0016893	1	18	0.473115	0.964638	KQ087363:1649213-1649693	http://amigo.geneontology.org/cgi-bin/amigo/term_details?term=GO:0016893
modification by symbiont of host morphology or physiology	Gene Ontology	GO:0044003	1	18	0.473115	0.964638	KQ087365:1881927-1882409	http://amigo.geneontology.org/cgi-bin/amigo/term_details?term=GO:0044003
negative regulation of sporulation resulting in formation of a cellular spore	Gene Ontology	GO:0042174	1	18	0.473115	0.964638	KQ087364:987665-989053	http://amigo.geneontology.org/cgi-bin/amigo/term_details?term=GO:0042174
N-acetyltransferase activity	Gene Ontology	GO:0008080	2	46	0.475618	0.967859	KQ087369:407772-408867|KQ087362:3048195-3048903	http://amigo.geneontology.org/cgi-bin/amigo/term_details?term=GO:0008080
nucleoside phosphate metabolic process	Gene Ontology	GO:0006753	5	132	0.477699	0.970211	KQ087358:774516-776073|KQ087362:1157172-1159141|KQ087360:1535766-1537176|KQ087363:1452640-1453806|KQ087373:896451-898001	http://amigo.geneontology.org/cgi-bin/amigo/term_details?term=GO:0006753
regulation of protein transport	Gene Ontology	GO:0051223	1	19	0.490605	0.98686	KQ087368:347994-348672	http://amigo.geneontology.org/cgi-bin/amigo/term_details?term=GO:0051223
amide transport	Gene Ontology	GO:0042886	1	19	0.490605	0.98686	KQ087373:622241-624593	http://amigo.geneontology.org/cgi-bin/amigo/term_details?term=GO:0042886
regulation of sterigmatocystin biosynthetic process	Gene Ontology	GO:0010913	1	19	0.490605	0.98686	KQ087368:348761-349952	http://amigo.geneontology.org/cgi-bin/amigo/term_details?term=GO:0010913
methionine biosynthetic process	Gene Ontology	GO:0009086	1	19	0.490605	0.98686	KQ087376:132644-133020	http://amigo.geneontology.org/cgi-bin/amigo/term_details?term=GO:0009086
regulation of establishment of protein localization	Gene Ontology	GO:0070201	1	19	0.490605	0.98686	KQ087368:347994-348672	http://amigo.geneontology.org/cgi-bin/amigo/term_details?term=GO:0070201
regulation of biological quality	Gene Ontology	GO:0065008	9	251	0.495057	0.993907	KQ087376:132644-133020|KQ087362:3076957-3078700|KQ087375:1054635-1057874|KQ087375:1083141-1084855|KQ087373:896451-898001|KQ087365:1881927-1882409|KQ087366:1682756-1683611|KQ087365:557223-558575|KQ087368:347994-348672	http://amigo.geneontology.org/cgi-bin/amigo/term_details?term=GO:0065008
alpha-amino acid metabolic process	Gene Ontology	GO:1901605	4	106	0.497238	0.995092	KQ087367:423921-426010|KQ087376:132644-133020|KQ087363:1452640-1453806|KQ087375:702699-704464	http://amigo.geneontology.org/cgi-bin/amigo/term_details?term=GO:1901605
anion binding	Gene Ontology	GO:0043168	3	77	0.497546	0.995092	KQ087367:423921-426010|KQ087369:836595-837678|KQ087358:1013167-1014595	http://amigo.geneontology.org/cgi-bin/amigo/term_details?term=GO:0043168
maintenance of location in cell	Gene Ontology	GO:0051651	1	20	0.507516	1	KQ087368:347994-348672	http://amigo.geneontology.org/cgi-bin/amigo/term_details?term=GO:0051651
methionine metabolic process	Gene Ontology	GO:0006555	1	20	0.507516	1	KQ087376:132644-133020	http://amigo.geneontology.org/cgi-bin/amigo/term_details?term=GO:0006555
regulation of intracellular transport	Gene Ontology	GO:0032386	1	20	0.507516	1	KQ087368:347994-348672	http://amigo.geneontology.org/cgi-bin/amigo/term_details?term=GO:0032386
N-acyltransferase activity	Gene Ontology	GO:0016410	2	49	0.507727	1	KQ087369:407772-408867|KQ087362:3048195-3048903	http://amigo.geneontology.org/cgi-bin/amigo/term_details?term=GO:0016410
oxidoreductase activity, acting on paired donors, with incorporation or reduction of molecular oxygen	Gene Ontology	GO:0016705	4	108	0.511416	1	KQ087365:2385862-2391569|KQ087358:1033352-1034924|KQ087374:210259-212568|KQ087370:82247-83719	http://amigo.geneontology.org/cgi-bin/amigo/term_details?term=GO:0016705
oxidoreductase activity, acting on the CH-OH group of donors, NAD or NADP as acceptor	Gene Ontology	GO:0016616	4	108	0.511416	1	KQ087358:774516-776073|KQ087359:2266552-2267534|KQ087369:843849-845735|KQ087363:1452640-1453806	http://amigo.geneontology.org/cgi-bin/amigo/term_details?term=GO:0016616
cell septum	Gene Ontology	GO:0030428	2	50	0.518143	1	KQ087365:1755454-1755916|KQ087359:370703-371359	http://amigo.geneontology.org/cgi-bin/amigo/term_details?term=GO:0030428
plasma membrane	Gene Ontology	GO:0005886	9	256	0.518197	1	KQ087359:370703-371359|KQ087360:2538058-2539986|KQ087361:67268-68159|KQ087375:1054635-1057874|KQ087365:2085944-2087615|KQ087369:804966-806718|KQ087373:896451-898001|KQ087369:435390-436842|KQ087367:218267-220072	http://amigo.geneontology.org/cgi-bin/amigo/term_details?term=GO:0005886
cellular calcium ion homeostasis	Gene Ontology	GO:0006874	1	21	0.523868	1	KQ087375:1054635-1057874	http://amigo.geneontology.org/cgi-bin/amigo/term_details?term=GO:0006874
positive regulation of cellular amide metabolic process	Gene Ontology	GO:0034250	1	21	0.523868	1	KQ087358:1010971-1012453	http://amigo.geneontology.org/cgi-bin/amigo/term_details?term=GO:0034250
copper ion binding	Gene Ontology	GO:0005507	1	21	0.523868	1	KQ087376:127886-129986	http://amigo.geneontology.org/cgi-bin/amigo/term_details?term=GO:0005507
regulation of sulfur metabolic process	Gene Ontology	GO:0042762	1	21	0.523868	1	KQ087358:1010971-1012453	http://amigo.geneontology.org/cgi-bin/amigo/term_details?term=GO:0042762
intrinsic component of mitochondrial membrane	Gene Ontology	GO:0098573	1	21	0.523868	1	KQ087361:67268-68159	http://amigo.geneontology.org/cgi-bin/amigo/term_details?term=GO:0098573
integral component of mitochondrial membrane	Gene Ontology	GO:0032592	1	21	0.523868	1	KQ087361:67268-68159	http://amigo.geneontology.org/cgi-bin/amigo/term_details?term=GO:0032592
transmembrane transport	Gene Ontology	GO:0055085	16	464	0.527375	1	KQ087367:1577327-1579154|KQ087373:622241-624593|KQ087368:113066-114653|KQ087373:980127-981877|KQ087358:1029916-1031545|KQ087359:1411400-1413175|KQ087373:607970-610066|KQ087360:2390040-2391787|KQ087373:541958-546058|KQ087365:2085944-2087615|KQ087375:1083141-1084855|KQ087360:2538058-2539986|KQ087363:68341-70378|KQ087364:892758-894251|KQ087375:1054635-1057874|KQ087367:1321132-1322862	http://amigo.geneontology.org/cgi-bin/amigo/term_details?term=GO:0055085
transferase activity	Gene Ontology	GO:0016740	24	699	0.52768	1	KQ087367:547555-549291|KQ087359:17246-18199|KQ087362:3048195-3048903|KQ087367:307111-310254|KQ087363:1452640-1453806|KQ087360:1953270-1954293|KQ087359:2263883-2266350|KQ087368:347994-348672|KQ087363:999702-1001317|KQ087363:2611182-2612288|KQ087368:360409-362046|KQ087373:518820-520652|KQ087367:1550147-1551296|KQ087363:9602-10755|KQ087362:3072518-3074048|KQ087369:407772-408867|KQ087359:213548-21472…	http://amigo.geneontology.org/cgi-bin/amigo/term_details?term=GO:0016740
phosphatase activity	Gene Ontology	GO:0016791	2	52	0.538531	1	KQ087369:909572-910471|KQ087363:2943619-2945359	http://amigo.geneontology.org/cgi-bin/amigo/term_details?term=GO:0016791
calcium ion homeostasis	Gene Ontology	GO:0055074	1	22	0.539679	1	KQ087375:1054635-1057874	http://amigo.geneontology.org/cgi-bin/amigo/term_details?term=GO:0055074
regulation of cellular protein localization	Gene Ontology	GO:1903827	1	22	0.539679	1	KQ087368:347994-348672	http://amigo.geneontology.org/cgi-bin/amigo/term_details?term=GO:1903827
guanyl-nucleotide exchange factor activity	Gene Ontology	GO:0005085	1	22	0.539679	1	KQ087358:2016788-2019530	http://amigo.geneontology.org/cgi-bin/amigo/term_details?term=GO:0005085
cell periphery	Gene Ontology	GO:0071944	13	380	0.543331	1	KQ087359:370703-371359|KQ087360:2538058-2539986|KQ087359:225790-227494|KQ087367:220174-220731|KQ087362:1747125-1748285|KQ087364:854832-858221|KQ087375:1054635-1057874|KQ087365:2085944-2087615|KQ087369:804966-806718|KQ087373:896451-898001|KQ087361:67268-68159|KQ087369:435390-436842|KQ087367:218267-220072	http://amigo.geneontology.org/cgi-bin/amigo/term_details?term=GO:0071944
peptide metabolic process	Gene Ontology	GO:0006518	8	232	0.544151	1	KQ087376:132644-133020|KQ087358:1013167-1014595|KQ087358:1010971-1012453|KQ087358:1003501-1007320|KQ087358:1029916-1031545|KQ087358:1035226-1036289|KQ087358:1028456-1029328|KQ087358:1016612-1023117	http://amigo.geneontology.org/cgi-bin/amigo/term_details?term=GO:0006518
small molecule biosynthetic process	Gene Ontology	GO:0044283	10	292	0.546857	1	KQ087376:132644-133020|KQ087373:1095640-1096498|KQ087359:225790-227494|KQ087363:1452640-1453806|KQ087368:346783-347575|KQ087362:1157172-1159141|KQ087368:348761-349952|KQ087368:410167-412357|KQ087363:575562-576797|KQ087368:351403-352769	http://amigo.geneontology.org/cgi-bin/amigo/term_details?term=GO:0044283
endopeptidase activity	Gene Ontology	GO:0004175	2	53	0.5485	1	KQ087360:585536-586935|KQ087365:1666693-1668551	http://amigo.geneontology.org/cgi-bin/amigo/term_details?term=GO:0004175
hemicellulose metabolic process	Gene Ontology	GO:0010410	1	23	0.554965	1	KQ087360:999535-1000354	http://amigo.geneontology.org/cgi-bin/amigo/term_details?term=GO:0010410
carboxy-lyase activity	Gene Ontology	GO:0016831	1	23	0.554965	1	KQ087367:423921-426010	http://amigo.geneontology.org/cgi-bin/amigo/term_details?term=GO:0016831
mitochondrial respiratory chain complex assembly	Gene Ontology	GO:0033108	1	23	0.554965	1	KQ087361:67268-68159	http://amigo.geneontology.org/cgi-bin/amigo/term_details?term=GO:0033108
pyrimidine-containing compound biosynthetic process	Gene Ontology	GO:0072528	1	23	0.554965	1	KQ087363:575562-576797	http://amigo.geneontology.org/cgi-bin/amigo/term_details?term=GO:0072528
acetyltransferase activity	Gene Ontology	GO:0016407	2	54	0.558317	1	KQ087369:407772-408867|KQ087362:3048195-3048903	http://amigo.geneontology.org/cgi-bin/amigo/term_details?term=GO:0016407
positive regulation of biosynthetic process	Gene Ontology	GO:0009891	4	116	0.566187	1	KQ087368:348761-349952|KQ087370:28124-30599|KQ087358:1010971-1012453|KQ087368:351403-352769	http://amigo.geneontology.org/cgi-bin/amigo/term_details?term=GO:0009891
amide binding	Gene Ontology	GO:0033218	2	55	0.567982	1	KQ087358:1016612-1023117|KQ087358:1003501-1007320	http://amigo.geneontology.org/cgi-bin/amigo/term_details?term=GO:0033218
protein import into nucleus	Gene Ontology	GO:0006606	1	24	0.569746	1	KQ087368:347994-348672	http://amigo.geneontology.org/cgi-bin/amigo/term_details?term=GO:0006606
lipid modification	Gene Ontology	GO:0030258	1	24	0.569746	1	KQ087367:307111-310254	http://amigo.geneontology.org/cgi-bin/amigo/term_details?term=GO:0030258
divalent inorganic cation transmembrane transporter activity	Gene Ontology	GO:0072509	1	25	0.584037	1	KQ087375:1054635-1057874	http://amigo.geneontology.org/cgi-bin/amigo/term_details?term=GO:0072509
negative regulation of sporulation	Gene Ontology	GO:0043939	1	25	0.584037	1	KQ087364:987665-989053	http://amigo.geneontology.org/cgi-bin/amigo/term_details?term=GO:0043939
regulation of sexual sporulation	Gene Ontology	GO:0034306	1	25	0.584037	1	KQ087364:987665-989053	http://amigo.geneontology.org/cgi-bin/amigo/term_details?term=GO:0034306
regulation of sexual sporulation resulting in formation of a cellular spore	Gene Ontology	GO:0043940	1	25	0.584037	1	KQ087364:987665-989053	http://amigo.geneontology.org/cgi-bin/amigo/term_details?term=GO:0043940
protein targeting to nucleus	Gene Ontology	GO:0044744	1	25	0.584037	1	KQ087368:347994-348672	http://amigo.geneontology.org/cgi-bin/amigo/term_details?term=GO:0044744
negative regulation of meiotic cell cycle	Gene Ontology	GO:0051447	1	25	0.584037	1	KQ087364:987665-989053	http://amigo.geneontology.org/cgi-bin/amigo/term_details?term=GO:0051447
cellular amide metabolic process	Gene Ontology	GO:0043603	9	271	0.585304	1	KQ087376:132644-133020|KQ087358:1013167-1014595|KQ087358:1010971-1012453|KQ087373:518820-520652|KQ087358:1003501-1007320|KQ087358:1029916-1031545|KQ087358:1035226-1036289|KQ087358:1028456-1029328|KQ087358:1016612-1023117	http://amigo.geneontology.org/cgi-bin/amigo/term_details?term=GO:0043603
metal ion transmembrane transporter activity	Gene Ontology	GO:0046873	2	57	0.586851	1	KQ087375:1054635-1057874|KQ087375:1083141-1084855	http://amigo.geneontology.org/cgi-bin/amigo/term_details?term=GO:0046873
nucleotide binding	Gene Ontology	GO:0000166	24	722	0.591784	1	KQ087362:1972584-1974621|KQ087369:843849-845735|KQ087359:2263883-2266350|KQ087367:1199056-1200381|KQ087365:557223-558575|KQ087363:141459-146109|KQ087369:814467-815786|KQ087367:433393-435062|KQ087362:3076957-3078700|KQ087365:2354054-2355609|KQ087358:774516-776073|KQ087364:55149-56373|KQ087373:541958-546058|KQ087373:546729-548769|KQ087360:1133782-1136067|KQ087370:75797-77440|KQ087359:266432-269058|…	http://amigo.geneontology.org/cgi-bin/amigo/term_details?term=GO:0000166
nucleoside phosphate binding	Gene Ontology	GO:1901265	24	722	0.591784	1	KQ087362:1972584-1974621|KQ087369:843849-845735|KQ087359:2263883-2266350|KQ087367:1199056-1200381|KQ087365:557223-558575|KQ087363:141459-146109|KQ087369:814467-815786|KQ087367:433393-435062|KQ087362:3076957-3078700|KQ087365:2354054-2355609|KQ087358:774516-776073|KQ087364:55149-56373|KQ087373:541958-546058|KQ087373:546729-548769|KQ087360:1133782-1136067|KQ087370:75797-77440|KQ087359:266432-269058|…	http://amigo.geneontology.org/cgi-bin/amigo/term_details?term=GO:1901265
organophosphate metabolic process	Gene Ontology	GO:0019637	7	212	0.592715	1	KQ087363:272557-274522|KQ087362:1157172-1159141|KQ087359:225790-227494|KQ087363:1452640-1453806|KQ087360:1535766-1537176|KQ087373:896451-898001|KQ087358:774516-776073	http://amigo.geneontology.org/cgi-bin/amigo/term_details?term=GO:0019637
single-organism nuclear import	Gene Ontology	GO:1902593	1	26	0.597855	1	KQ087368:347994-348672	http://amigo.geneontology.org/cgi-bin/amigo/term_details?term=GO:1902593
organelle inheritance	Gene Ontology	GO:0048308	1	26	0.597855	1	KQ087376:132644-133020	http://amigo.geneontology.org/cgi-bin/amigo/term_details?term=GO:0048308
magnesium ion binding	Gene Ontology	GO:0000287	1	26	0.597855	1	KQ087362:1157172-1159141	http://amigo.geneontology.org/cgi-bin/amigo/term_details?term=GO:0000287
ether metabolic process	Gene Ontology	GO:0018904	1	26	0.597855	1	KQ087376:132644-133020	http://amigo.geneontology.org/cgi-bin/amigo/term_details?term=GO:0018904
cellular modified amino acid metabolic process	Gene Ontology	GO:0006575	1	26	0.597855	1	KQ087376:132644-133020	http://amigo.geneontology.org/cgi-bin/amigo/term_details?term=GO:0006575
cellular ketone metabolic process	Gene Ontology	GO:0042180	3	90	0.599843	1	KQ087368:348761-349952|KQ087368:346783-347575|KQ087368:351403-352769	http://amigo.geneontology.org/cgi-bin/amigo/term_details?term=GO:0042180
inorganic cation transmembrane transport	Gene Ontology	GO:0098662	2	59	0.605104	1	KQ087375:1054635-1057874|KQ087375:1083141-1084855	http://amigo.geneontology.org/cgi-bin/amigo/term_details?term=GO:0098662
organonitrogen compound catabolic process	Gene Ontology	GO:1901565	3	91	0.607127	1	KQ087373:518820-520652|KQ087363:1452640-1453806|KQ087375:702699-704464	http://amigo.geneontology.org/cgi-bin/amigo/term_details?term=GO:1901565
nuclear import	Gene Ontology	GO:0051170	1	27	0.611216	1	KQ087368:347994-348672	http://amigo.geneontology.org/cgi-bin/amigo/term_details?term=GO:0051170
aspartate family amino acid biosynthetic process	Gene Ontology	GO:0009067	1	27	0.611216	1	KQ087376:132644-133020	http://amigo.geneontology.org/cgi-bin/amigo/term_details?term=GO:0009067
single-organism membrane fusion	Gene Ontology	GO:0044801	1	27	0.611216	1	KQ087376:132644-133020	http://amigo.geneontology.org/cgi-bin/amigo/term_details?term=GO:0044801
pyrimidine-containing compound metabolic process	Gene Ontology	GO:0072527	1	27	0.611216	1	KQ087363:575562-576797	http://amigo.geneontology.org/cgi-bin/amigo/term_details?term=GO:0072527
vitamin biosynthetic process	Gene Ontology	GO:0009110	1	27	0.611216	1	KQ087363:575562-576797	http://amigo.geneontology.org/cgi-bin/amigo/term_details?term=GO:0009110
water-soluble vitamin biosynthetic process	Gene Ontology	GO:0042364	1	27	0.611216	1	KQ087363:575562-576797	http://amigo.geneontology.org/cgi-bin/amigo/term_details?term=GO:0042364
regulation of cellular localization	Gene Ontology	GO:0060341	1	27	0.611216	1	KQ087368:347994-348672	http://amigo.geneontology.org/cgi-bin/amigo/term_details?term=GO:0060341
isoprenoid biosynthetic process	Gene Ontology	GO:0008299	1	27	0.611216	1	KQ087368:410167-412357	http://amigo.geneontology.org/cgi-bin/amigo/term_details?term=GO:0008299
peptide biosynthetic process	Gene Ontology	GO:0043043	7	216	0.611898	1	KQ087358:1013167-1014595|KQ087358:1010971-1012453|KQ087358:1003501-1007320|KQ087358:1029916-1031545|KQ087358:1035226-1036289|KQ087358:1028456-1029328|KQ087358:1016612-1023117	http://amigo.geneontology.org/cgi-bin/amigo/term_details?term=GO:0043043
transition metal ion binding	Gene Ontology	GO:0046914	19	582	0.619022	1	KQ087373:1160141-1161146|KQ087373:1095640-1096498|KQ087363:2611182-2612288|KQ087358:1010971-1012453|KQ087359:213548-214722|KQ087358:1033352-1034924|KQ087370:28124-30599|KQ087363:9602-10755|KQ087363:1452640-1453806|KQ087359:2188715-2190753|KQ087376:127886-129986|KQ087373:1051779-1053812|KQ087370:277312-277699|KQ087370:82247-83719|KQ087359:59415-61245|KQ087368:348761-349952|KQ087373:643298-644630|K…	http://amigo.geneontology.org/cgi-bin/amigo/term_details?term=GO:0046914
regulation of Ras protein signal transduction	Gene Ontology	GO:0046578	1	28	0.624133	1	KQ087358:2016788-2019530	http://amigo.geneontology.org/cgi-bin/amigo/term_details?term=GO:0046578
quinone biosynthetic process	Gene Ontology	GO:1901663	1	28	0.624133	1	KQ087368:348761-349952	http://amigo.geneontology.org/cgi-bin/amigo/term_details?term=GO:1901663
membrane fusion	Gene Ontology	GO:0061025	1	28	0.624133	1	KQ087376:132644-133020	http://amigo.geneontology.org/cgi-bin/amigo/term_details?term=GO:0061025
regulation of cellular response to stress	Gene Ontology	GO:0080135	1	28	0.624133	1	KQ087376:132644-133020	http://amigo.geneontology.org/cgi-bin/amigo/term_details?term=GO:0080135
inorganic ion transmembrane transport	Gene Ontology	GO:0098660	2	62	0.63133	1	KQ087375:1054635-1057874|KQ087375:1083141-1084855	http://amigo.geneontology.org/cgi-bin/amigo/term_details?term=GO:0098660
vitamin metabolic process	Gene Ontology	GO:0006766	1	29	0.636623	1	KQ087363:575562-576797	http://amigo.geneontology.org/cgi-bin/amigo/term_details?term=GO:0006766
water-soluble vitamin metabolic process	Gene Ontology	GO:0006767	1	29	0.636623	1	KQ087363:575562-576797	http://amigo.geneontology.org/cgi-bin/amigo/term_details?term=GO:0006767
mitochondrial intermembrane space	Gene Ontology	GO:0005758	1	29	0.636623	1	KQ087376:132644-133020	http://amigo.geneontology.org/cgi-bin/amigo/term_details?term=GO:0005758
quinone metabolic process	Gene Ontology	GO:1901661	1	29	0.636623	1	KQ087368:348761-349952	http://amigo.geneontology.org/cgi-bin/amigo/term_details?term=GO:1901661
isoprenoid metabolic process	Gene Ontology	GO:0006720	1	29	0.636623	1	KQ087368:410167-412357	http://amigo.geneontology.org/cgi-bin/amigo/term_details?term=GO:0006720
negative regulation of developmental process	Gene Ontology	GO:0051093	1	29	0.636623	1	KQ087364:987665-989053	http://amigo.geneontology.org/cgi-bin/amigo/term_details?term=GO:0051093
cation transmembrane transport	Gene Ontology	GO:0098655	2	63	0.639765	1	KQ087375:1054635-1057874|KQ087375:1083141-1084855	http://amigo.geneontology.org/cgi-bin/amigo/term_details?term=GO:0098655
ATPase activity, coupled	Gene Ontology	GO:0042623	4	128	0.64158	1	KQ087373:541958-546058|KQ087363:141459-146109|KQ087373:480236-483672|KQ087375:1054635-1057874	http://amigo.geneontology.org/cgi-bin/amigo/term_details?term=GO:0042623
cellular response to extracellular stimulus	Gene Ontology	GO:0031668	4	129	0.647462	1	KQ087364:987665-989053|KQ087369:804966-806718|KQ087362:799065-800463|KQ087364:854832-858221	http://amigo.geneontology.org/cgi-bin/amigo/term_details?term=GO:0031668
negative regulation of cellular protein metabolic process	Gene Ontology	GO:0032269	1	30	0.648699	1	KQ087359:370703-371359	http://amigo.geneontology.org/cgi-bin/amigo/term_details?term=GO:0032269
regulation of protein localization	Gene Ontology	GO:0032880	1	30	0.648699	1	KQ087368:347994-348672	http://amigo.geneontology.org/cgi-bin/amigo/term_details?term=GO:0032880
response to organic substance	Gene Ontology	GO:0010033	3	97	0.648959	1	KQ087367:547555-549291|KQ087365:2159709-2160555|KQ087364:854832-858221	http://amigo.geneontology.org/cgi-bin/amigo/term_details?term=GO:0010033
cellular chemical homeostasis	Gene Ontology	GO:0055082	3	97	0.648959	1	KQ087375:1054635-1057874|KQ087375:1083141-1084855|KQ087373:896451-898001	http://amigo.geneontology.org/cgi-bin/amigo/term_details?term=GO:0055082
nuclease activity	Gene Ontology	GO:0004518	2	65	0.656181	1	KQ087363:1649213-1649693|KQ087365:1755454-1755916	http://amigo.geneontology.org/cgi-bin/amigo/term_details?term=GO:0004518
interaction with host	Gene Ontology	GO:0051701	1	31	0.660375	1	KQ087365:1881927-1882409	http://amigo.geneontology.org/cgi-bin/amigo/term_details?term=GO:0051701
oxidoreductase activity, acting on the CH-CH group of donors	Gene Ontology	GO:0016627	1	31	0.660375	1	KQ087369:435390-436842	http://amigo.geneontology.org/cgi-bin/amigo/term_details?term=GO:0016627
secretion	Gene Ontology	GO:0046903	1	31	0.660375	1	KQ087359:370703-371359	http://amigo.geneontology.org/cgi-bin/amigo/term_details?term=GO:0046903
secretion by cell	Gene Ontology	GO:0032940	1	31	0.660375	1	KQ087359:370703-371359	http://amigo.geneontology.org/cgi-bin/amigo/term_details?term=GO:0032940
cellular response to external stimulus	Gene Ontology	GO:0071496	4	132	0.664724	1	KQ087364:987665-989053|KQ087369:804966-806718|KQ087362:799065-800463|KQ087364:854832-858221	http://amigo.geneontology.org/cgi-bin/amigo/term_details?term=GO:0071496
steroid biosynthetic process	Gene Ontology	GO:0006694	1	32	0.671664	1	KQ087368:410167-412357	http://amigo.geneontology.org/cgi-bin/amigo/term_details?term=GO:0006694
organelle envelope lumen	Gene Ontology	GO:0031970	1	32	0.671664	1	KQ087376:132644-133020	http://amigo.geneontology.org/cgi-bin/amigo/term_details?term=GO:0031970
UDP-N-acetylmuramate dehydrogenase activity	Gene Ontology	GO:0008762	1	32	0.671664	1	KQ087369:843849-845735	http://amigo.geneontology.org/cgi-bin/amigo/term_details?term=GO:0008762
protein localization to nucleus	Gene Ontology	GO:0034504	1	32	0.671664	1	KQ087368:347994-348672	http://amigo.geneontology.org/cgi-bin/amigo/term_details?term=GO:0034504
negative regulation of protein metabolic process	Gene Ontology	GO:0051248	1	32	0.671664	1	KQ087359:370703-371359	http://amigo.geneontology.org/cgi-bin/amigo/term_details?term=GO:0051248
cellular response to pH	Gene Ontology	GO:0071467	1	32	0.671664	1	KQ087367:547555-549291	http://amigo.geneontology.org/cgi-bin/amigo/term_details?term=GO:0071467
fatty acid biosynthetic process	Gene Ontology	GO:0006633	1	32	0.671664	1	KQ087373:1095640-1096498	http://amigo.geneontology.org/cgi-bin/amigo/term_details?term=GO:0006633
nucleobase-containing small molecule metabolic process	Gene Ontology	GO:0055086	5	166	0.674014	1	KQ087358:774516-776073|KQ087362:1157172-1159141|KQ087360:1535766-1537176|KQ087363:1452640-1453806|KQ087373:896451-898001	http://amigo.geneontology.org/cgi-bin/amigo/term_details?term=GO:0055086
filamentous growth of a population of unicellular organisms in response to starvation	Gene Ontology	GO:0036170	2	68	0.679678	1	KQ087369:804966-806718|KQ087362:799065-800463	http://amigo.geneontology.org/cgi-bin/amigo/term_details?term=GO:0036170
organelle fusion	Gene Ontology	GO:0048284	1	33	0.682579	1	KQ087376:132644-133020	http://amigo.geneontology.org/cgi-bin/amigo/term_details?term=GO:0048284
ER to Golgi vesicle-mediated transport	Gene Ontology	GO:0006888	1	33	0.682579	1	KQ087376:132644-133020	http://amigo.geneontology.org/cgi-bin/amigo/term_details?term=GO:0006888
response to light stimulus	Gene Ontology	GO:0009416	1	33	0.682579	1	KQ087370:368885-370011	http://amigo.geneontology.org/cgi-bin/amigo/term_details?term=GO:0009416
response to radiation	Gene Ontology	GO:0009314	1	33	0.682579	1	KQ087370:368885-370011	http://amigo.geneontology.org/cgi-bin/amigo/term_details?term=GO:0009314
negative regulation of multi-organism process	Gene Ontology	GO:0043901	1	33	0.682579	1	KQ087364:987665-989053	http://amigo.geneontology.org/cgi-bin/amigo/term_details?term=GO:0043901
Golgi apparatus	Gene Ontology	GO:0005794	5	168	0.683917	1	KQ087363:999702-1001317|KQ087359:370703-371359|KQ087362:1587636-1589145|KQ087373:980127-981877|KQ087360:2538058-2539986	http://amigo.geneontology.org/cgi-bin/amigo/term_details?term=GO:0005794
ATPase activity	Gene Ontology	GO:0016887	5	169	0.688793	1	KQ087373:541958-546058|KQ087373:480236-483672|KQ087363:141459-146109|KQ087360:1133782-1136067|KQ087375:1054635-1057874	http://amigo.geneontology.org/cgi-bin/amigo/term_details?term=GO:0016887
regulation of small GTPase mediated signal transduction	Gene Ontology	GO:0051056	1	34	0.693132	1	KQ087358:2016788-2019530	http://amigo.geneontology.org/cgi-bin/amigo/term_details?term=GO:0051056
phospholipid metabolic process	Gene Ontology	GO:0006644	2	70	0.694605	1	KQ087363:272557-274522|KQ087359:225790-227494	http://amigo.geneontology.org/cgi-bin/amigo/term_details?term=GO:0006644
amide biosynthetic process	Gene Ontology	GO:0043604	7	235	0.695976	1	KQ087358:1013167-1014595|KQ087358:1010971-1012453|KQ087358:1003501-1007320|KQ087358:1029916-1031545|KQ087358:1035226-1036289|KQ087358:1028456-1029328|KQ087358:1016612-1023117	http://amigo.geneontology.org/cgi-bin/amigo/term_details?term=GO:0043604
chemical homeostasis	Gene Ontology	GO:0048878	3	105	0.699669	1	KQ087375:1054635-1057874|KQ087375:1083141-1084855|KQ087373:896451-898001	http://amigo.geneontology.org/cgi-bin/amigo/term_details?term=GO:0048878
response to extracellular stimulus	Gene Ontology	GO:0009991	4	139	0.70273	1	KQ087364:987665-989053|KQ087369:804966-806718|KQ087362:799065-800463|KQ087364:854832-858221	http://amigo.geneontology.org/cgi-bin/amigo/term_details?term=GO:0009991
cell projection part	Gene Ontology	GO:0044463	1	35	0.703335	1	KQ087359:370703-371359	http://amigo.geneontology.org/cgi-bin/amigo/term_details?term=GO:0044463
response to pH	Gene Ontology	GO:0009268	1	35	0.703335	1	KQ087367:547555-549291	http://amigo.geneontology.org/cgi-bin/amigo/term_details?term=GO:0009268
zinc ion binding	Gene Ontology	GO:0008270	13	427	0.705135	1	KQ087363:2611182-2612288|KQ087358:1010971-1012453|KQ087359:213548-214722|KQ087373:1160141-1161146|KQ087370:28124-30599|KQ087363:9602-10755|KQ087363:1452640-1453806|KQ087359:2188715-2190753|KQ087373:1051779-1053812|KQ087370:277312-277699|KQ087359:59415-61245|KQ087368:348761-349952|KQ087367:266419-267265	http://amigo.geneontology.org/cgi-bin/amigo/term_details?term=GO:0008270
cellular metal ion homeostasis	Gene Ontology	GO:0006875	2	72	0.708954	1	KQ087375:1054635-1057874|KQ087375:1083141-1084855	http://amigo.geneontology.org/cgi-bin/amigo/term_details?term=GO:0006875
response to metal ion	Gene Ontology	GO:0010038	1	36	0.7132	1	KQ087368:347994-348672	http://amigo.geneontology.org/cgi-bin/amigo/term_details?term=GO:0010038
mating projection	Gene Ontology	GO:0005937	1	36	0.7132	1	KQ087359:370703-371359	http://amigo.geneontology.org/cgi-bin/amigo/term_details?term=GO:0005937
unfolded protein binding	Gene Ontology	GO:0051082	1	36	0.7132	1	KQ087363:1793895-1795149	http://amigo.geneontology.org/cgi-bin/amigo/term_details?term=GO:0051082
cell projection	Gene Ontology	GO:0042995	1	36	0.7132	1	KQ087359:370703-371359	http://amigo.geneontology.org/cgi-bin/amigo/term_details?term=GO:0042995
pigment biosynthetic process	Gene Ontology	GO:0046148	1	36	0.7132	1	KQ087370:368885-370011	http://amigo.geneontology.org/cgi-bin/amigo/term_details?term=GO:0046148
storage vacuole	Gene Ontology	GO:0000322	4	142	0.718039	1	KQ087376:132644-133020|KQ087365:2085944-2087615|KQ087360:2538058-2539986|KQ087364:854832-858221	http://amigo.geneontology.org/cgi-bin/amigo/term_details?term=GO:0000322
lytic vacuole	Gene Ontology	GO:0000323	4	142	0.718039	1	KQ087376:132644-133020|KQ087365:2085944-2087615|KQ087360:2538058-2539986|KQ087364:854832-858221	http://amigo.geneontology.org/cgi-bin/amigo/term_details?term=GO:0000323
fungal-type vacuole	Gene Ontology	GO:0000324	4	142	0.718039	1	KQ087376:132644-133020|KQ087365:2085944-2087615|KQ087360:2538058-2539986|KQ087364:854832-858221	http://amigo.geneontology.org/cgi-bin/amigo/term_details?term=GO:0000324
cellular response to organic substance	Gene Ontology	GO:0071310	2	74	0.722737	1	KQ087365:2159709-2160555|KQ087364:854832-858221	http://amigo.geneontology.org/cgi-bin/amigo/term_details?term=GO:0071310
metal ion homeostasis	Gene Ontology	GO:0055065	2	74	0.722737	1	KQ087375:1054635-1057874|KQ087375:1083141-1084855	http://amigo.geneontology.org/cgi-bin/amigo/term_details?term=GO:0055065
ion transmembrane transport	Gene Ontology	GO:0034220	2	74	0.722737	1	KQ087375:1054635-1057874|KQ087375:1083141-1084855	http://amigo.geneontology.org/cgi-bin/amigo/term_details?term=GO:0034220
double-stranded DNA binding	Gene Ontology	GO:0003690	1	37	0.722738	1	KQ087367:469444-472189	http://amigo.geneontology.org/cgi-bin/amigo/term_details?term=GO:0003690
Ras protein signal transduction	Gene Ontology	GO:0007265	1	37	0.722738	1	KQ087358:2016788-2019530	http://amigo.geneontology.org/cgi-bin/amigo/term_details?term=GO:0007265
NAD binding	Gene Ontology	GO:0051287	1	37	0.722738	1	KQ087367:1199056-1200381	http://amigo.geneontology.org/cgi-bin/amigo/term_details?term=GO:0051287
metal ion transport	Gene Ontology	GO:0030001	2	75	0.72942	1	KQ087375:1054635-1057874|KQ087375:1083141-1084855	http://amigo.geneontology.org/cgi-bin/amigo/term_details?term=GO:0030001
secondary alcohol biosynthetic process	Gene Ontology	GO:1902653	1	38	0.731959	1	KQ087368:410167-412357	http://amigo.geneontology.org/cgi-bin/amigo/term_details?term=GO:1902653
transition metal ion transport	Gene Ontology	GO:0000041	1	38	0.731959	1	KQ087375:1083141-1084855	http://amigo.geneontology.org/cgi-bin/amigo/term_details?term=GO:0000041
endomembrane system organization	Gene Ontology	GO:0010256	1	38	0.731959	1	KQ087359:370703-371359	http://amigo.geneontology.org/cgi-bin/amigo/term_details?term=GO:0010256
inner mitochondrial membrane protein complex	Gene Ontology	GO:0098800	1	39	0.740875	1	KQ087361:67268-68159	http://amigo.geneontology.org/cgi-bin/amigo/term_details?term=GO:0098800
secondary alcohol metabolic process	Gene Ontology	GO:1902652	1	39	0.740875	1	KQ087368:410167-412357	http://amigo.geneontology.org/cgi-bin/amigo/term_details?term=GO:1902652
plasma membrane part	Gene Ontology	GO:0044459	1	39	0.740875	1	KQ087359:370703-371359	http://amigo.geneontology.org/cgi-bin/amigo/term_details?term=GO:0044459
positive regulation of cellular biosynthetic process	Gene Ontology	GO:0031328	3	113	0.744634	1	KQ087358:1010971-1012453|KQ087368:348761-349952|KQ087368:351403-352769	http://amigo.geneontology.org/cgi-bin/amigo/term_details?term=GO:0031328
filamentous growth of a population of unicellular organisms in response to biotic stimulus	Gene Ontology	GO:0036180	2	78	0.748655	1	KQ087369:804966-806718|KQ087362:799065-800463	http://amigo.geneontology.org/cgi-bin/amigo/term_details?term=GO:0036180
negative regulation of reproductive process	Gene Ontology	GO:2000242	1	40	0.749495	1	KQ087364:987665-989053	http://amigo.geneontology.org/cgi-bin/amigo/term_details?term=GO:2000242
cellular amino acid metabolic process	Gene Ontology	GO:0006520	4	149	0.751486	1	KQ087369:836595-837678|KQ087376:132644-133020|KQ087363:1452640-1453806|KQ087375:702699-704464	http://amigo.geneontology.org/cgi-bin/amigo/term_details?term=GO:0006520
pathogenesis	Gene Ontology	GO:0009405	3	115	0.755001	1	KQ087368:22419-24214|KQ087359:370703-371359|KQ087375:1083141-1084855	http://amigo.geneontology.org/cgi-bin/amigo/term_details?term=GO:0009405
regulation of transport	Gene Ontology	GO:0051049	1	41	0.757829	1	KQ087368:347994-348672	http://amigo.geneontology.org/cgi-bin/amigo/term_details?term=GO:0051049
calcium ion binding	Gene Ontology	GO:0005509	1	41	0.757829	1	KQ087359:2059065-2061695	http://amigo.geneontology.org/cgi-bin/amigo/term_details?term=GO:0005509
hyphal tip	Gene Ontology	GO:0001411	1	41	0.757829	1	KQ087365:1755454-1755916	http://amigo.geneontology.org/cgi-bin/amigo/term_details?term=GO:0001411
pigment metabolic process	Gene Ontology	GO:0042440	1	41	0.757829	1	KQ087370:368885-370011	http://amigo.geneontology.org/cgi-bin/amigo/term_details?term=GO:0042440
cellular cation homeostasis	Gene Ontology	GO:0030003	2	80	0.760817	1	KQ087375:1054635-1057874|KQ087375:1083141-1084855	http://amigo.geneontology.org/cgi-bin/amigo/term_details?term=GO:0030003
cellular response to biotic stimulus	Gene Ontology	GO:0071216	2	80	0.760817	1	KQ087369:804966-806718|KQ087362:799065-800463	http://amigo.geneontology.org/cgi-bin/amigo/term_details?term=GO:0071216
organic acid biosynthetic process	Gene Ontology	GO:0016053	5	186	0.763835	1	KQ087376:132644-133020|KQ087368:348761-349952|KQ087373:1095640-1096498|KQ087368:346783-347575|KQ087368:351403-352769	http://amigo.geneontology.org/cgi-bin/amigo/term_details?term=GO:0016053
regulation of sporulation resulting in formation of a cellular spore	Gene Ontology	GO:0042173	1	42	0.765887	1	KQ087364:987665-989053	http://amigo.geneontology.org/cgi-bin/amigo/term_details?term=GO:0042173
spore germination	Gene Ontology	GO:0009847	1	42	0.765887	1	KQ087373:434260-436619	http://amigo.geneontology.org/cgi-bin/amigo/term_details?term=GO:0009847
cellular response to abiotic stimulus	Gene Ontology	GO:0071214	2	81	0.766706	1	KQ087367:547555-549291|KQ087364:854832-858221	http://amigo.geneontology.org/cgi-bin/amigo/term_details?term=GO:0071214
organic substance metabolic process	Gene Ontology	GO:0071704	78	2433	0.767208	1	KQ087367:547555-549291|KQ087374:229954-230815|KQ087360:2488577-2491201|KQ087373:1095640-1096498|KQ087358:1010971-1012453|KQ087367:307111-310254|KQ087360:999535-1000354|KQ087363:1452640-1453806|KQ087359:2188715-2190753|KQ087364:854832-858221|KQ087367:423921-426010|KQ087359:370703-371359|KQ087368:348761-349952|KQ087359:1491741-1492919|KQ087367:455950-456781|KQ087370:28124-30599|KQ087359:2263883-226…	http://amigo.geneontology.org/cgi-bin/amigo/term_details?term=GO:0071704
proteolysis	Gene Ontology	GO:0006508	5	188	0.771695	1	KQ087375:1026593-1028945|KQ087360:2488577-2491201|KQ087374:219550-220229|KQ087360:585536-586935|KQ087365:1666693-1668551	http://amigo.geneontology.org/cgi-bin/amigo/term_details?term=GO:0006508
monovalent inorganic cation transport	Gene Ontology	GO:0015672	1	43	0.773677	1	KQ087375:1054635-1057874	http://amigo.geneontology.org/cgi-bin/amigo/term_details?term=GO:0015672
glycosylation	Gene Ontology	GO:0070085	1	43	0.773677	1	KQ087367:307111-310254	http://amigo.geneontology.org/cgi-bin/amigo/term_details?term=GO:0070085
regulation of filamentous growth of a population of unicellular organisms	Gene Ontology	GO:1900428	1	43	0.773677	1	KQ087376:132644-133020	http://amigo.geneontology.org/cgi-bin/amigo/term_details?term=GO:1900428
binding	Gene Ontology	GO:0005488	68	2140	0.775604	1	KQ087374:229954-230815|KQ087373:1095640-1096498|KQ087358:1010971-1012453|KQ087367:1761164-1762469|KQ087358:1033352-1034924|KQ087363:1452640-1453806|KQ087359:2188715-2190753|KQ087367:433393-435062|KQ087367:423921-426010|KQ087369:843849-845735|KQ087370:82247-83719|KQ087370:28124-30599|KQ087359:2263883-2266350|KQ087373:643298-644630|KQ087365:557223-558575|KQ087368:347994-348672|KQ087363:141459-14610…	http://amigo.geneontology.org/cgi-bin/amigo/term_details?term=GO:0005488
cation homeostasis	Gene Ontology	GO:0055080	2	83	0.778106	1	KQ087375:1054635-1057874|KQ087375:1083141-1084855	http://amigo.geneontology.org/cgi-bin/amigo/term_details?term=GO:0055080
cellular bud	Gene Ontology	GO:0005933	1	44	0.781209	1	KQ087359:370703-371359	http://amigo.geneontology.org/cgi-bin/amigo/term_details?term=GO:0005933
regulation of cell differentiation	Gene Ontology	GO:0045595	1	44	0.781209	1	KQ087364:987665-989053	http://amigo.geneontology.org/cgi-bin/amigo/term_details?term=GO:0045595
cellular ion homeostasis	Gene Ontology	GO:0006873	2	84	0.783622	1	KQ087375:1054635-1057874|KQ087375:1083141-1084855	http://amigo.geneontology.org/cgi-bin/amigo/term_details?term=GO:0006873
inorganic ion homeostasis	Gene Ontology	GO:0098771	2	84	0.783622	1	KQ087375:1054635-1057874|KQ087375:1083141-1084855	http://amigo.geneontology.org/cgi-bin/amigo/term_details?term=GO:0098771
establishment of protein localization to membrane	Gene Ontology	GO:0090150	1	45	0.788491	1	KQ087359:370703-371359	http://amigo.geneontology.org/cgi-bin/amigo/term_details?term=GO:0090150
vacuole organization	Gene Ontology	GO:0007033	1	45	0.788491	1	KQ087376:132644-133020	http://amigo.geneontology.org/cgi-bin/amigo/term_details?term=GO:0007033
regulation of protein phosphorylation	Gene Ontology	GO:0001932	1	45	0.788491	1	KQ087359:370703-371359	http://amigo.geneontology.org/cgi-bin/amigo/term_details?term=GO:0001932
symbiosis, encompassing mutualism through parasitism	Gene Ontology	GO:0044403	1	45	0.788491	1	KQ087365:1881927-1882409	http://amigo.geneontology.org/cgi-bin/amigo/term_details?term=GO:0044403
positive regulation of metabolic process	Gene Ontology	GO:0009893	4	159	0.793883	1	KQ087368:348761-349952|KQ087370:28124-30599|KQ087358:1010971-1012453|KQ087368:351403-352769	http://amigo.geneontology.org/cgi-bin/amigo/term_details?term=GO:0009893
cellular transition metal ion homeostasis	Gene Ontology	GO:0046916	1	46	0.795532	1	KQ087375:1083141-1084855	http://amigo.geneontology.org/cgi-bin/amigo/term_details?term=GO:0046916
transition metal ion homeostasis	Gene Ontology	GO:0055076	1	46	0.795532	1	KQ087375:1083141-1084855	http://amigo.geneontology.org/cgi-bin/amigo/term_details?term=GO:0055076
monocarboxylic acid biosynthetic process	Gene Ontology	GO:0072330	1	46	0.795532	1	KQ087373:1095640-1096498	http://amigo.geneontology.org/cgi-bin/amigo/term_details?term=GO:0072330
transferase activity, transferring alkyl or aryl (other than methyl) groups	Gene Ontology	GO:0016765	1	46	0.795532	1	KQ087368:347994-348672	http://amigo.geneontology.org/cgi-bin/amigo/term_details?term=GO:0016765
phospholipid biosynthetic process	Gene Ontology	GO:0008654	1	46	0.795532	1	KQ087359:225790-227494	http://amigo.geneontology.org/cgi-bin/amigo/term_details?term=GO:0008654
cation transmembrane transporter activity	Gene Ontology	GO:0008324	3	124	0.797521	1	KQ087375:1054635-1057874|KQ087375:1083141-1084855|KQ087373:480236-483672	http://amigo.geneontology.org/cgi-bin/amigo/term_details?term=GO:0008324
cellular nitrogen compound catabolic process	Gene Ontology	GO:0044270	2	87	0.799453	1	KQ087373:518820-520652|KQ087367:1442764-1444280	http://amigo.geneontology.org/cgi-bin/amigo/term_details?term=GO:0044270
ion homeostasis	Gene Ontology	GO:0050801	2	87	0.799453	1	KQ087375:1054635-1057874|KQ087375:1083141-1084855	http://amigo.geneontology.org/cgi-bin/amigo/term_details?term=GO:0050801
cation transport	Gene Ontology	GO:0006812	3	125	0.801844	1	KQ087375:1054635-1057874|KQ087375:1083141-1084855|KQ087373:480236-483672	http://amigo.geneontology.org/cgi-bin/amigo/term_details?term=GO:0006812
regulation of meiotic cell cycle	Gene Ontology	GO:0051445	1	47	0.802338	1	KQ087364:987665-989053	http://amigo.geneontology.org/cgi-bin/amigo/term_details?term=GO:0051445
interspecies interaction between organisms	Gene Ontology	GO:0044419	1	47	0.802338	1	KQ087365:1881927-1882409	http://amigo.geneontology.org/cgi-bin/amigo/term_details?term=GO:0044419
cell wall polysaccharide metabolic process	Gene Ontology	GO:0010383	1	47	0.802338	1	KQ087360:999535-1000354	http://amigo.geneontology.org/cgi-bin/amigo/term_details?term=GO:0010383
steroid metabolic process	Gene Ontology	GO:0008202	1	48	0.808919	1	KQ087368:410167-412357	http://amigo.geneontology.org/cgi-bin/amigo/term_details?term=GO:0008202
protein localization to membrane	Gene Ontology	GO:0072657	1	48	0.808919	1	KQ087359:370703-371359	http://amigo.geneontology.org/cgi-bin/amigo/term_details?term=GO:0072657
cellular response to nutrient levels	Gene Ontology	GO:0031669	3	128	0.81435	1	KQ087364:987665-989053|KQ087369:804966-806718|KQ087362:799065-800463	http://amigo.geneontology.org/cgi-bin/amigo/term_details?term=GO:0031669
regulation of filamentous growth	Gene Ontology	GO:0010570	1	49	0.815281	1	KQ087376:132644-133020	http://amigo.geneontology.org/cgi-bin/amigo/term_details?term=GO:0010570
integral component of organelle membrane	Gene Ontology	GO:0031301	1	49	0.815281	1	KQ087361:67268-68159	http://amigo.geneontology.org/cgi-bin/amigo/term_details?term=GO:0031301
regulation of phosphorylation	Gene Ontology	GO:0042325	1	49	0.815281	1	KQ087359:370703-371359	http://amigo.geneontology.org/cgi-bin/amigo/term_details?term=GO:0042325
intrinsic component of organelle membrane	Gene Ontology	GO:0031300	1	50	0.821432	1	KQ087361:67268-68159	http://amigo.geneontology.org/cgi-bin/amigo/term_details?term=GO:0031300
response to external stimulus	Gene Ontology	GO:0009605	4	167	0.823464	1	KQ087364:987665-989053|KQ087369:804966-806718|KQ087362:799065-800463|KQ087364:854832-858221	http://amigo.geneontology.org/cgi-bin/amigo/term_details?term=GO:0009605
vacuole	Gene Ontology	GO:0005773	5	203	0.824401	1	KQ087375:1054635-1057874|KQ087376:132644-133020|KQ087365:2085944-2087615|KQ087360:2538058-2539986|KQ087364:854832-858221	http://amigo.geneontology.org/cgi-bin/amigo/term_details?term=GO:0005773
transport	Gene Ontology	GO:0006810	25	858	0.824914	1	KQ087367:1577327-1579154|KQ087359:370703-371359|KQ087373:980127-981877|KQ087360:2538058-2539986|KQ087363:68341-70378|KQ087364:892758-894251|KQ087368:347994-348672|KQ087363:141459-146109|KQ087373:622241-624593|KQ087368:113066-114653|KQ087370:368885-370011|KQ087359:1411400-1413175|KQ087369:796405-798362|KQ087358:1029916-1031545|KQ087365:2085944-2087615|KQ087365:1684405-1685465|KQ087367:1321132-1322…	http://amigo.geneontology.org/cgi-bin/amigo/term_details?term=GO:0006810
response to stimulus	Gene Ontology	GO:0050896	23	800	0.833677	1	KQ087364:987665-989053|KQ087367:547555-549291|KQ087374:229954-230815|KQ087359:31525-33642|KQ087364:854832-858221|KQ087360:2538058-2539986|KQ087364:892758-894251|KQ087368:347994-348672|KQ087370:368885-370011|KQ087365:2385862-2391569|KQ087375:702699-704464|KQ087365:2159709-2160555|KQ087362:799065-800463|KQ087365:2085944-2087615|KQ087358:2016788-2019530|KQ087366:346161-347511|KQ087376:132644-133020|…	http://amigo.geneontology.org/cgi-bin/amigo/term_details?term=GO:0050896
fungal-type vacuole membrane	Gene Ontology	GO:0000329	2	95	0.836761	1	KQ087365:2085944-2087615|KQ087360:2538058-2539986	http://amigo.geneontology.org/cgi-bin/amigo/term_details?term=GO:0000329
lytic vacuole membrane	Gene Ontology	GO:0098852	2	95	0.836761	1	KQ087365:2085944-2087615|KQ087360:2538058-2539986	http://amigo.geneontology.org/cgi-bin/amigo/term_details?term=GO:0098852
inorganic cation transmembrane transporter activity	Gene Ontology	GO:0022890	2	95	0.836761	1	KQ087375:1054635-1057874|KQ087375:1083141-1084855	http://amigo.geneontology.org/cgi-bin/amigo/term_details?term=GO:0022890
site of polarized growth	Gene Ontology	GO:0030427	2	95	0.836761	1	KQ087365:1755454-1755916|KQ087359:370703-371359	http://amigo.geneontology.org/cgi-bin/amigo/term_details?term=GO:0030427
hyphal growth	Gene Ontology	GO:0030448	3	134	0.837366	1	KQ087373:434260-436619|KQ087363:575562-576797|KQ087375:1054635-1057874	http://amigo.geneontology.org/cgi-bin/amigo/term_details?term=GO:0030448
S-adenosylmethionine-dependent methyltransferase activity	Gene Ontology	GO:0008757	1	53	0.838687	1	KQ087368:37246-38224	http://amigo.geneontology.org/cgi-bin/amigo/term_details?term=GO:0008757
regulation of intracellular signal transduction	Gene Ontology	GO:1902531	1	53	0.838687	1	KQ087358:2016788-2019530	http://amigo.geneontology.org/cgi-bin/amigo/term_details?term=GO:1902531
single-organism cellular process	Gene Ontology	GO:0044763	51	1679	0.843341	1	KQ087364:987665-989053|KQ087367:547555-549291|KQ087359:370703-371359|KQ087373:1095640-1096498|KQ087358:1010971-1012453|KQ087367:307111-310254|KQ087358:1033352-1034924|KQ087363:1452640-1453806|KQ087360:1535766-1537176|KQ087364:854832-858221|KQ087367:423921-426010|KQ087368:348761-349952|KQ087370:82247-83719|KQ087359:2263883-2266350|KQ087368:410167-412357|KQ087365:557223-558575|KQ087368:347994-34867…	http://amigo.geneontology.org/cgi-bin/amigo/term_details?term=GO:0044763
asexual sporulation resulting in formation of a cellular spore	Gene Ontology	GO:0043936	1	54	0.844061	1	KQ087359:370703-371359	http://amigo.geneontology.org/cgi-bin/amigo/term_details?term=GO:0043936
transferase activity, transferring hexosyl groups	Gene Ontology	GO:0016758	1	54	0.844061	1	KQ087367:307111-310254	http://amigo.geneontology.org/cgi-bin/amigo/term_details?term=GO:0016758
protein modification by small protein conjugation	Gene Ontology	GO:0032446	1	54	0.844061	1	KQ087368:347994-348672	http://amigo.geneontology.org/cgi-bin/amigo/term_details?term=GO:0032446
regulation of localization	Gene Ontology	GO:0032879	1	54	0.844061	1	KQ087368:347994-348672	http://amigo.geneontology.org/cgi-bin/amigo/term_details?term=GO:0032879
single-organism transport	Gene Ontology	GO:0044765	7	280	0.844081	1	KQ087373:622241-624593|KQ087373:980127-981877|KQ087375:1054635-1057874|KQ087365:2085944-2087615|KQ087359:370703-371359|KQ087373:896451-898001|KQ087368:347994-348672	http://amigo.geneontology.org/cgi-bin/amigo/term_details?term=GO:0044765
heterocyclic compound binding	Gene Ontology	GO:1901363	40	1341	0.844821	1	KQ087374:229954-230815|KQ087358:1033352-1034924|KQ087359:31525-33642|KQ087359:2188715-2190753|KQ087367:433393-435062|KQ087369:843849-845735|KQ087370:82247-83719|KQ087370:28124-30599|KQ087359:2263883-2266350|KQ087367:1199056-1200381|KQ087365:557223-558575|KQ087363:141459-146109|KQ087369:814467-815786|KQ087362:1157172-1159141|KQ087373:546729-548769|KQ087374:65712-68033|KQ087362:3076957-3078700|KQ08…	http://amigo.geneontology.org/cgi-bin/amigo/term_details?term=GO:1901363
phosphate-containing compound metabolic process	Gene Ontology	GO:0006796	10	383	0.845251	1	KQ087363:272557-274522|KQ087359:370703-371359|KQ087359:225790-227494|KQ087363:1452640-1453806|KQ087360:1535766-1537176|KQ087367:433393-435062|KQ087362:1157172-1159141|KQ087373:896451-898001|KQ087358:774516-776073|KQ087359:2263883-2266350	http://amigo.geneontology.org/cgi-bin/amigo/term_details?term=GO:0006796
organic cyclic compound binding	Gene Ontology	GO:0097159	40	1344	0.848552	1	KQ087374:229954-230815|KQ087358:1033352-1034924|KQ087359:31525-33642|KQ087359:2188715-2190753|KQ087367:433393-435062|KQ087369:843849-845735|KQ087370:82247-83719|KQ087370:28124-30599|KQ087359:2263883-2266350|KQ087367:1199056-1200381|KQ087365:557223-558575|KQ087363:141459-146109|KQ087369:814467-815786|KQ087362:1157172-1159141|KQ087373:546729-548769|KQ087374:65712-68033|KQ087362:3076957-3078700|KQ08…	http://amigo.geneontology.org/cgi-bin/amigo/term_details?term=GO:0097159
regulation of sporulation	Gene Ontology	GO:0043937	1	55	0.849256	1	KQ087364:987665-989053	http://amigo.geneontology.org/cgi-bin/amigo/term_details?term=GO:0043937
actin cytoskeleton organization	Gene Ontology	GO:0030036	1	55	0.849256	1	KQ087359:370703-371359	http://amigo.geneontology.org/cgi-bin/amigo/term_details?term=GO:0030036
monovalent inorganic cation transmembrane transporter activity	Gene Ontology	GO:0015077	1	55	0.849256	1	KQ087375:1054635-1057874	http://amigo.geneontology.org/cgi-bin/amigo/term_details?term=GO:0015077
response to nutrient levels	Gene Ontology	GO:0031667	3	138	0.851311	1	KQ087364:987665-989053|KQ087369:804966-806718|KQ087362:799065-800463	http://amigo.geneontology.org/cgi-bin/amigo/term_details?term=GO:0031667
organonitrogen compound metabolic process	Gene Ontology	GO:1901564	19	683	0.85197	1	KQ087375:702699-704464|KQ087376:132644-133020|KQ087358:1013167-1014595|KQ087358:1010971-1012453|KQ087373:518820-520652|KQ087358:1003501-1007320|KQ087361:486265-487081|KQ087360:1535766-1537176|KQ087363:1452640-1453806|KQ087358:1029916-1031545|KQ087367:423921-426010|KQ087362:1157172-1159141|KQ087358:1035226-1036289|KQ087373:896451-898001|KQ087358:1028456-1029328|KQ087358:774516-776073|KQ087358:1016…	http://amigo.geneontology.org/cgi-bin/amigo/term_details?term=GO:1901564
establishment of localization	Gene Ontology	GO:0051234	25	877	0.854139	1	KQ087367:1577327-1579154|KQ087359:370703-371359|KQ087373:980127-981877|KQ087360:2538058-2539986|KQ087363:68341-70378|KQ087364:892758-894251|KQ087368:347994-348672|KQ087363:141459-146109|KQ087373:622241-624593|KQ087368:113066-114653|KQ087370:368885-370011|KQ087359:1411400-1413175|KQ087369:796405-798362|KQ087358:1029916-1031545|KQ087365:2085944-2087615|KQ087365:1684405-1685465|KQ087367:1321132-1322…	http://amigo.geneontology.org/cgi-bin/amigo/term_details?term=GO:0051234
actin filament-based process	Gene Ontology	GO:0030029	1	56	0.854279	1	KQ087359:370703-371359	http://amigo.geneontology.org/cgi-bin/amigo/term_details?term=GO:0030029
cellular carbohydrate biosynthetic process	Gene Ontology	GO:0034637	1	56	0.854279	1	KQ087359:225790-227494	http://amigo.geneontology.org/cgi-bin/amigo/term_details?term=GO:0034637
protein folding	Gene Ontology	GO:0006457	1	57	0.859135	1	KQ087363:1793895-1795149	http://amigo.geneontology.org/cgi-bin/amigo/term_details?term=GO:0006457
phosphorus metabolic process	Gene Ontology	GO:0006793	10	392	0.863809	1	KQ087363:272557-274522|KQ087359:370703-371359|KQ087359:225790-227494|KQ087363:1452640-1453806|KQ087360:1535766-1537176|KQ087367:433393-435062|KQ087362:1157172-1159141|KQ087373:896451-898001|KQ087358:774516-776073|KQ087359:2263883-2266350	http://amigo.geneontology.org/cgi-bin/amigo/term_details?term=GO:0006793
positive regulation of response to stimulus	Gene Ontology	GO:0048584	1	58	0.863829	1	KQ087376:132644-133020	http://amigo.geneontology.org/cgi-bin/amigo/term_details?term=GO:0048584
lipid biosynthetic process	Gene Ontology	GO:0008610	3	142	0.864206	1	KQ087368:410167-412357|KQ087373:1095640-1096498|KQ087359:225790-227494	http://amigo.geneontology.org/cgi-bin/amigo/term_details?term=GO:0008610
response to biotic stimulus	Gene Ontology	GO:0009607	2	103	0.867691	1	KQ087369:804966-806718|KQ087362:799065-800463	http://amigo.geneontology.org/cgi-bin/amigo/term_details?term=GO:0009607
hydrolase activity, acting on carbon-nitrogen (but not peptide) bonds	Gene Ontology	GO:0016810	1	60	0.872756	1	KQ087367:1442764-1444280	http://amigo.geneontology.org/cgi-bin/amigo/term_details?term=GO:0016810
phosphorylation	Gene Ontology	GO:0016310	4	184	0.87477	1	KQ087359:2263883-2266350|KQ087359:370703-371359|KQ087373:896451-898001|KQ087367:433393-435062	http://amigo.geneontology.org/cgi-bin/amigo/term_details?term=GO:0016310
filamentous growth of a population of unicellular organisms	Gene Ontology	GO:0044182	3	146	0.876109	1	KQ087376:132644-133020|KQ087369:804966-806718|KQ087362:799065-800463	http://amigo.geneontology.org/cgi-bin/amigo/term_details?term=GO:0044182
cellular response to stress	Gene Ontology	GO:0033554	10	399	0.876986	1	KQ087374:229954-230815|KQ087376:132644-133020|KQ087365:2159709-2160555|KQ087362:799065-800463|KQ087364:854832-858221|KQ087373:434260-436619|KQ087369:804966-806718|KQ087367:469444-472189|KQ087369:435390-436842|KQ087375:702699-704464	http://amigo.geneontology.org/cgi-bin/amigo/term_details?term=GO:0033554
protein import	Gene Ontology	GO:0017038	1	61	0.876998	1	KQ087368:347994-348672	http://amigo.geneontology.org/cgi-bin/amigo/term_details?term=GO:0017038
regulation of response to stress	Gene Ontology	GO:0080134	1	61	0.876998	1	KQ087376:132644-133020	http://amigo.geneontology.org/cgi-bin/amigo/term_details?term=GO:0080134
vacuolar membrane	Gene Ontology	GO:0005774	2	106	0.877836	1	KQ087365:2085944-2087615|KQ087360:2538058-2539986	http://amigo.geneontology.org/cgi-bin/amigo/term_details?term=GO:0005774
mitochondrial protein complex	Gene Ontology	GO:0098798	1	62	0.881099	1	KQ087361:67268-68159	http://amigo.geneontology.org/cgi-bin/amigo/term_details?term=GO:0098798
regulation of cellular amide metabolic process	Gene Ontology	GO:0034248	1	62	0.881099	1	KQ087358:1010971-1012453	http://amigo.geneontology.org/cgi-bin/amigo/term_details?term=GO:0034248
cell surface	Gene Ontology	GO:0009986	1	62	0.881099	1	KQ087359:225790-227494	http://amigo.geneontology.org/cgi-bin/amigo/term_details?term=GO:0009986
alpha-amino acid biosynthetic process	Gene Ontology	GO:1901607	1	62	0.881099	1	KQ087376:132644-133020	http://amigo.geneontology.org/cgi-bin/amigo/term_details?term=GO:1901607
organic substance transport	Gene Ontology	GO:0071702	8	333	0.883438	1	KQ087373:622241-624593|KQ087360:2538058-2539986|KQ087373:980127-981877|KQ087365:2085944-2087615|KQ087360:2390040-2391787|KQ087359:370703-371359|KQ087373:896451-898001|KQ087368:347994-348672	http://amigo.geneontology.org/cgi-bin/amigo/term_details?term=GO:0071702
single-organism membrane organization	Gene Ontology	GO:0044802	2	108	0.884197	1	KQ087376:132644-133020|KQ087359:370703-371359	http://amigo.geneontology.org/cgi-bin/amigo/term_details?term=GO:0044802
cellular amino acid biosynthetic process	Gene Ontology	GO:0008652	1	63	0.885063	1	KQ087376:132644-133020	http://amigo.geneontology.org/cgi-bin/amigo/term_details?term=GO:0008652
response to stress	Gene Ontology	GO:0006950	12	473	0.886529	1	KQ087374:229954-230815|KQ087376:132644-133020|KQ087365:2159709-2160555|KQ087362:799065-800463|KQ087365:2385862-2391569|KQ087359:31525-33642|KQ087364:854832-858221|KQ087373:434260-436619|KQ087369:804966-806718|KQ087367:469444-472189|KQ087369:435390-436842|KQ087375:702699-704464	http://amigo.geneontology.org/cgi-bin/amigo/term_details?term=GO:0006950
kinase activity	Gene Ontology	GO:0016301	3	151	0.889685	1	KQ087359:2263883-2266350|KQ087373:896451-898001|KQ087367:433393-435062	http://amigo.geneontology.org/cgi-bin/amigo/term_details?term=GO:0016301
cellular response to drug	Gene Ontology	GO:0035690	3	152	0.892235	1	KQ087364:892758-894251|KQ087365:2085944-2087615|KQ087360:2538058-2539986	http://amigo.geneontology.org/cgi-bin/amigo/term_details?term=GO:0035690
regulation of protein modification process	Gene Ontology	GO:0031399	1	65	0.892601	1	KQ087359:370703-371359	http://amigo.geneontology.org/cgi-bin/amigo/term_details?term=GO:0031399
positive regulation of nitrogen compound metabolic process	Gene Ontology	GO:0051173	2	111	0.893166	1	KQ087368:348761-349952|KQ087358:1010971-1012453	http://amigo.geneontology.org/cgi-bin/amigo/term_details?term=GO:0051173
cellular response to starvation	Gene Ontology	GO:0009267	2	111	0.893166	1	KQ087369:804966-806718|KQ087362:799065-800463	http://amigo.geneontology.org/cgi-bin/amigo/term_details?term=GO:0009267
single-organism localization	Gene Ontology	GO:1902578	7	304	0.895621	1	KQ087373:622241-624593|KQ087373:980127-981877|KQ087375:1054635-1057874|KQ087365:2085944-2087615|KQ087359:370703-371359|KQ087373:896451-898001|KQ087368:347994-348672	http://amigo.geneontology.org/cgi-bin/amigo/term_details?term=GO:1902578
heterocycle biosynthetic process	Gene Ontology	GO:0018130	20	747	0.896124	1	KQ087374:229954-230815|KQ087365:2159709-2160555|KQ087358:1013167-1014595|KQ087358:1010971-1012453|KQ087373:1051779-1053812|KQ087363:358458-359253|KQ087358:1028456-1029328|KQ087359:2188715-2190753|KQ087368:346783-347575|KQ087358:1029916-1031545|KQ087360:171314-172508|KQ087358:1035226-1036289|KQ087370:82247-83719|KQ087359:59415-61245|KQ087370:28124-30599|KQ087368:348761-349952|KQ087358:1016612-1023…	http://amigo.geneontology.org/cgi-bin/amigo/term_details?term=GO:0018130
carbohydrate biosynthetic process	Gene Ontology	GO:0016051	1	66	0.896183	1	KQ087359:225790-227494	http://amigo.geneontology.org/cgi-bin/amigo/term_details?term=GO:0016051
cell wall macromolecule metabolic process	Gene Ontology	GO:0044036	1	66	0.896183	1	KQ087360:999535-1000354	http://amigo.geneontology.org/cgi-bin/amigo/term_details?term=GO:0044036
ATP binding	Gene Ontology	GO:0005524	9	376	0.897125	1	KQ087373:541958-546058|KQ087367:433393-435062|KQ087373:546729-548769|KQ087373:896451-898001|KQ087365:2354054-2355609|KQ087367:469444-472189|KQ087359:2263883-2266350|KQ087363:141459-146109|KQ087360:1133782-1136067	http://amigo.geneontology.org/cgi-bin/amigo/term_details?term=GO:0005524
positive regulation of cellular metabolic process	Gene Ontology	GO:0031325	3	155	0.899573	1	KQ087358:1010971-1012453|KQ087368:348761-349952|KQ087368:351403-352769	http://amigo.geneontology.org/cgi-bin/amigo/term_details?term=GO:0031325
regulation of phosphorus metabolic process	Gene Ontology	GO:0051174	1	67	0.899646	1	KQ087359:370703-371359	http://amigo.geneontology.org/cgi-bin/amigo/term_details?term=GO:0051174
regulation of phosphate metabolic process	Gene Ontology	GO:0019220	1	67	0.899646	1	KQ087359:370703-371359	http://amigo.geneontology.org/cgi-bin/amigo/term_details?term=GO:0019220
carboxylic acid biosynthetic process	Gene Ontology	GO:0046394	2	114	0.901487	1	KQ087376:132644-133020|KQ087373:1095640-1096498	http://amigo.geneontology.org/cgi-bin/amigo/term_details?term=GO:0046394
membrane organization	Gene Ontology	GO:0061024	2	115	0.904124	1	KQ087376:132644-133020|KQ087359:370703-371359	http://amigo.geneontology.org/cgi-bin/amigo/term_details?term=GO:0061024
Golgi vesicle transport	Gene Ontology	GO:0048193	1	69	0.906231	1	KQ087376:132644-133020	http://amigo.geneontology.org/cgi-bin/amigo/term_details?term=GO:0048193
regulation of signal transduction	Gene Ontology	GO:0009966	1	69	0.906231	1	KQ087358:2016788-2019530	http://amigo.geneontology.org/cgi-bin/amigo/term_details?term=GO:0009966
adenyl ribonucleotide binding	Gene Ontology	GO:0032559	9	382	0.906498	1	KQ087373:541958-546058|KQ087367:433393-435062|KQ087373:546729-548769|KQ087373:896451-898001|KQ087365:2354054-2355609|KQ087367:469444-472189|KQ087359:2263883-2266350|KQ087363:141459-146109|KQ087360:1133782-1136067	http://amigo.geneontology.org/cgi-bin/amigo/term_details?term=GO:0032559
cellular response to stimulus	Gene Ontology	GO:0051716	18	690	0.90695	1	KQ087364:987665-989053|KQ087367:547555-549291|KQ087374:229954-230815|KQ087376:132644-133020|KQ087365:2159709-2160555|KQ087362:799065-800463|KQ087361:486265-487081|KQ087364:854832-858221|KQ087358:2016788-2019530|KQ087373:434260-436619|KQ087365:2085944-2087615|KQ087358:1035226-1036289|KQ087369:804966-806718|KQ087360:2538058-2539986|KQ087367:469444-472189|KQ087364:892758-894251|KQ087369:435390-43684…	http://amigo.geneontology.org/cgi-bin/amigo/term_details?term=GO:0051716
positive regulation of transcription from RNA polymerase II promoter	Gene Ontology	GO:0045944	1	70	0.909359	1	KQ087368:348761-349952	http://amigo.geneontology.org/cgi-bin/amigo/term_details?term=GO:0045944
regulation of multi-organism process	Gene Ontology	GO:0043900	1	70	0.909359	1	KQ087364:987665-989053	http://amigo.geneontology.org/cgi-bin/amigo/term_details?term=GO:0043900
adenyl nucleotide binding	Gene Ontology	GO:0030554	9	384	0.909459	1	KQ087373:541958-546058|KQ087367:433393-435062|KQ087373:546729-548769|KQ087373:896451-898001|KQ087365:2354054-2355609|KQ087367:469444-472189|KQ087359:2263883-2266350|KQ087363:141459-146109|KQ087360:1133782-1136067	http://amigo.geneontology.org/cgi-bin/amigo/term_details?term=GO:0030554
DNA binding	Gene Ontology	GO:0003677	8	350	0.912016	1	KQ087374:229954-230815|KQ087373:1051779-1053812|KQ087363:358458-359253|KQ087359:59415-61245|KQ087359:2188715-2190753|KQ087368:348761-349952|KQ087370:28124-30599|KQ087367:469444-472189	http://amigo.geneontology.org/cgi-bin/amigo/term_details?term=GO:0003677
mitochondrial membrane part	Gene Ontology	GO:0044455	1	71	0.912384	1	KQ087361:67268-68159	http://amigo.geneontology.org/cgi-bin/amigo/term_details?term=GO:0044455
small GTPase mediated signal transduction	Gene Ontology	GO:0007264	1	71	0.912384	1	KQ087358:2016788-2019530	http://amigo.geneontology.org/cgi-bin/amigo/term_details?term=GO:0007264
vacuolar part	Gene Ontology	GO:0044437	2	119	0.914027	1	KQ087365:2085944-2087615|KQ087360:2538058-2539986	http://amigo.geneontology.org/cgi-bin/amigo/term_details?term=GO:0044437
regulation of signaling	Gene Ontology	GO:0023051	1	72	0.915308	1	KQ087358:2016788-2019530	http://amigo.geneontology.org/cgi-bin/amigo/term_details?term=GO:0023051
carbohydrate derivative metabolic process	Gene Ontology	GO:1901135	5	242	0.916714	1	KQ087358:774516-776073|KQ087362:1157172-1159141|KQ087360:1535766-1537176|KQ087363:1452640-1453806|KQ087373:896451-898001	http://amigo.geneontology.org/cgi-bin/amigo/term_details?term=GO:1901135
response to starvation	Gene Ontology	GO:0042594	2	121	0.918612	1	KQ087369:804966-806718|KQ087362:799065-800463	http://amigo.geneontology.org/cgi-bin/amigo/term_details?term=GO:0042594
organic cyclic compound biosynthetic process	Gene Ontology	GO:1901362	21	802	0.919887	1	KQ087368:410167-412357|KQ087374:229954-230815|KQ087365:2159709-2160555|KQ087358:1013167-1014595|KQ087358:1010971-1012453|KQ087373:1051779-1053812|KQ087363:358458-359253|KQ087358:1028456-1029328|KQ087359:2188715-2190753|KQ087368:346783-347575|KQ087358:1029916-1031545|KQ087360:171314-172508|KQ087358:1035226-1036289|KQ087370:82247-83719|KQ087359:59415-61245|KQ087370:28124-30599|KQ087368:348761-34995…	http://amigo.geneontology.org/cgi-bin/amigo/term_details?term=GO:1901362
filamentous growth	Gene Ontology	GO:0030447	6	282	0.920124	1	KQ087376:132644-133020|KQ087362:799065-800463|KQ087375:1054635-1057874|KQ087373:434260-436619|KQ087369:804966-806718|KQ087363:575562-576797	http://amigo.geneontology.org/cgi-bin/amigo/term_details?term=GO:0030447
regulation of response to stimulus	Gene Ontology	GO:0048583	2	122	0.920817	1	KQ087376:132644-133020|KQ087358:2016788-2019530	http://amigo.geneontology.org/cgi-bin/amigo/term_details?term=GO:0048583
regulation of cell communication	Gene Ontology	GO:0010646	1	74	0.920868	1	KQ087358:2016788-2019530	http://amigo.geneontology.org/cgi-bin/amigo/term_details?term=GO:0010646
cell tip	Gene Ontology	GO:0051286	1	74	0.920868	1	KQ087359:370703-371359	http://amigo.geneontology.org/cgi-bin/amigo/term_details?term=GO:0051286
response to drug	Gene Ontology	GO:0042493	3	165	0.920896	1	KQ087364:892758-894251|KQ087365:2085944-2087615|KQ087360:2538058-2539986	http://amigo.geneontology.org/cgi-bin/amigo/term_details?term=GO:0042493
integral component of membrane	Gene Ontology	GO:0016021	13	533	0.921136	1	KQ087367:1577327-1579154|KQ087368:113066-114653|KQ087361:67268-68159|KQ087358:1029916-1031545|KQ087359:1411400-1413175|KQ087360:2390040-2391787|KQ087373:541958-546058|KQ087365:2085944-2087615|KQ087363:68341-70378|KQ087364:892758-894251|KQ087375:1054635-1057874|KQ087363:141459-146109|KQ087373:480236-483672	http://amigo.geneontology.org/cgi-bin/amigo/term_details?term=GO:0016021
membrane	Gene Ontology	GO:0016020	29	1066	0.921614	1	KQ087367:1577327-1579154|KQ087359:370703-371359|KQ087373:980127-981877|KQ087360:2538058-2539986|KQ087363:68341-70378|KQ087364:892758-894251|KQ087367:1199056-1200381|KQ087363:141459-146109|KQ087368:113066-114653|KQ087361:67268-68159|KQ087370:368885-370011|KQ087359:1411400-1413175|KQ087369:796405-798362|KQ087358:1029916-1031545|KQ087365:2085944-2087615|KQ087367:218267-220072|KQ087365:1684405-168546…	http://amigo.geneontology.org/cgi-bin/amigo/term_details?term=GO:0016020
coenzyme biosynthetic process	Gene Ontology	GO:0009108	1	75	0.923509	1	KQ087368:348761-349952	http://amigo.geneontology.org/cgi-bin/amigo/term_details?term=GO:0009108
heterocycle catabolic process	Gene Ontology	GO:0046700	1	76	0.926063	1	KQ087373:518820-520652	http://amigo.geneontology.org/cgi-bin/amigo/term_details?term=GO:0046700
protein modification by small protein conjugation or removal	Gene Ontology	GO:0070647	1	76	0.926063	1	KQ087368:347994-348672	http://amigo.geneontology.org/cgi-bin/amigo/term_details?term=GO:0070647
negative regulation of cell cycle process	Gene Ontology	GO:0010948	1	77	0.928532	1	KQ087364:987665-989053	http://amigo.geneontology.org/cgi-bin/amigo/term_details?term=GO:0010948
mitotic spindle pole body	Gene Ontology	GO:0044732	1	78	0.930919	1	KQ087375:1524875-1528764	http://amigo.geneontology.org/cgi-bin/amigo/term_details?term=GO:0044732
positive regulation of transcription, DNA-templated	Gene Ontology	GO:0045893	1	78	0.930919	1	KQ087368:348761-349952	http://amigo.geneontology.org/cgi-bin/amigo/term_details?term=GO:0045893
positive regulation of nucleic acid-templated transcription	Gene Ontology	GO:1903508	1	78	0.930919	1	KQ087368:348761-349952	http://amigo.geneontology.org/cgi-bin/amigo/term_details?term=GO:1903508
regulation of reproductive process	Gene Ontology	GO:2000241	1	78	0.930919	1	KQ087364:987665-989053	http://amigo.geneontology.org/cgi-bin/amigo/term_details?term=GO:2000241
positive regulation of RNA biosynthetic process	Gene Ontology	GO:1902680	1	78	0.930919	1	KQ087368:348761-349952	http://amigo.geneontology.org/cgi-bin/amigo/term_details?term=GO:1902680
intrinsic component of membrane	Gene Ontology	GO:0031224	13	545	0.933806	1	KQ087367:1577327-1579154|KQ087368:113066-114653|KQ087361:67268-68159|KQ087358:1029916-1031545|KQ087359:1411400-1413175|KQ087360:2390040-2391787|KQ087373:541958-546058|KQ087365:2085944-2087615|KQ087363:68341-70378|KQ087364:892758-894251|KQ087375:1054635-1057874|KQ087363:141459-146109|KQ087373:480236-483672	http://amigo.geneontology.org/cgi-bin/amigo/term_details?term=GO:0031224
fungal-type cell wall organization	Gene Ontology	GO:0031505	1	80	0.935456	1	KQ087362:1747125-1748285	http://amigo.geneontology.org/cgi-bin/amigo/term_details?term=GO:0031505
transferase activity, transferring glycosyl groups	Gene Ontology	GO:0016757	1	81	0.937612	1	KQ087367:307111-310254	http://amigo.geneontology.org/cgi-bin/amigo/term_details?term=GO:0016757
single-organism cellular localization	Gene Ontology	GO:1902580	2	131	0.938287	1	KQ087359:370703-371359|KQ087368:347994-348672	http://amigo.geneontology.org/cgi-bin/amigo/term_details?term=GO:1902580
organic cyclic compound catabolic process	Gene Ontology	GO:1901361	1	82	0.939696	1	KQ087373:518820-520652	http://amigo.geneontology.org/cgi-bin/amigo/term_details?term=GO:1901361
nucleocytoplasmic transport	Gene Ontology	GO:0006913	1	82	0.939696	1	KQ087368:347994-348672	http://amigo.geneontology.org/cgi-bin/amigo/term_details?term=GO:0006913
localization	Gene Ontology	GO:0051179	25	959	0.940162	1	KQ087367:1577327-1579154|KQ087359:370703-371359|KQ087373:980127-981877|KQ087360:2538058-2539986|KQ087363:68341-70378|KQ087364:892758-894251|KQ087368:347994-348672|KQ087363:141459-146109|KQ087373:622241-624593|KQ087368:113066-114653|KQ087370:368885-370011|KQ087359:1411400-1413175|KQ087369:796405-798362|KQ087358:1029916-1031545|KQ087365:2085944-2087615|KQ087365:1684405-1685465|KQ087367:1321132-1322…	http://amigo.geneontology.org/cgi-bin/amigo/term_details?term=GO:0051179
nuclear transport	Gene Ontology	GO:0051169	1	83	0.941711	1	KQ087368:347994-348672	http://amigo.geneontology.org/cgi-bin/amigo/term_details?term=GO:0051169
ribonucleotide binding	Gene Ontology	GO:0032553	11	485	0.943847	1	KQ087373:541958-546058|KQ087367:433393-435062|KQ087373:546729-548769|KQ087373:896451-898001|KQ087365:2354054-2355609|KQ087367:469444-472189|KQ087359:2263883-2266350|KQ087365:557223-558575|KQ087363:141459-146109|KQ087360:1133782-1136067|KQ087369:814467-815786	http://amigo.geneontology.org/cgi-bin/amigo/term_details?term=GO:0032553
positive regulation of RNA metabolic process	Gene Ontology	GO:0051254	1	85	0.945542	1	KQ087368:348761-349952	http://amigo.geneontology.org/cgi-bin/amigo/term_details?term=GO:0051254
positive regulation of macromolecule biosynthetic process	Gene Ontology	GO:0010557	1	85	0.945542	1	KQ087368:348761-349952	http://amigo.geneontology.org/cgi-bin/amigo/term_details?term=GO:0010557
positive regulation of gene expression	Gene Ontology	GO:0010628	1	86	0.947362	1	KQ087368:348761-349952	http://amigo.geneontology.org/cgi-bin/amigo/term_details?term=GO:0010628
cell wall organization	Gene Ontology	GO:0071555	1	87	0.949121	1	KQ087362:1747125-1748285	http://amigo.geneontology.org/cgi-bin/amigo/term_details?term=GO:0071555
regulation of growth	Gene Ontology	GO:0040008	1	87	0.949121	1	KQ087376:132644-133020	http://amigo.geneontology.org/cgi-bin/amigo/term_details?term=GO:0040008
external encapsulating structure organization	Gene Ontology	GO:0045229	1	87	0.949121	1	KQ087362:1747125-1748285	http://amigo.geneontology.org/cgi-bin/amigo/term_details?term=GO:0045229
regulation of nucleic acid-templated transcription	Gene Ontology	GO:1903506	9	420	0.950632	1	KQ087374:229954-230815|KQ087358:1010971-1012453|KQ087373:1051779-1053812|KQ087363:358458-359253|KQ087359:59415-61245|KQ087359:2188715-2190753|KQ087368:348761-349952|KQ087370:28124-30599|KQ087367:266419-267265	http://amigo.geneontology.org/cgi-bin/amigo/term_details?term=GO:1903506
regulation of RNA biosynthetic process	Gene Ontology	GO:2001141	9	420	0.950632	1	KQ087374:229954-230815|KQ087358:1010971-1012453|KQ087373:1051779-1053812|KQ087363:358458-359253|KQ087359:59415-61245|KQ087359:2188715-2190753|KQ087368:348761-349952|KQ087370:28124-30599|KQ087367:266419-267265	http://amigo.geneontology.org/cgi-bin/amigo/term_details?term=GO:2001141
regulation of transcription, DNA-templated	Gene Ontology	GO:0006355	9	420	0.950632	1	KQ087374:229954-230815|KQ087358:1010971-1012453|KQ087373:1051779-1053812|KQ087363:358458-359253|KQ087359:59415-61245|KQ087359:2188715-2190753|KQ087368:348761-349952|KQ087370:28124-30599|KQ087367:266419-267265	http://amigo.geneontology.org/cgi-bin/amigo/term_details?term=GO:0006355
fruiting body development	Gene Ontology	GO:0030582	1	90	0.954055	1	KQ087365:1881927-1882409	http://amigo.geneontology.org/cgi-bin/amigo/term_details?term=GO:0030582
regulation of anatomical structure morphogenesis	Gene Ontology	GO:0022603	1	90	0.954055	1	KQ087364:987665-989053	http://amigo.geneontology.org/cgi-bin/amigo/term_details?term=GO:0022603
cellular metabolic process	Gene Ontology	GO:0044237	63	2202	0.955273	1	KQ087367:547555-549291|KQ087374:229954-230815|KQ087359:370703-371359|KQ087373:1095640-1096498|KQ087358:1010971-1012453|KQ087367:307111-310254|KQ087367:1761164-1762469|KQ087358:1033352-1034924|KQ087363:1452640-1453806|KQ087359:2188715-2190753|KQ087364:854832-858221|KQ087367:423921-426010|KQ087368:348761-349952|KQ087370:82247-83719|KQ087370:28124-30599|KQ087359:2263883-2266350|KQ087373:643298-64463…	http://amigo.geneontology.org/cgi-bin/amigo/term_details?term=GO:0044237
carbohydrate derivative binding	Gene Ontology	GO:0097367	11	499	0.955319	1	KQ087373:541958-546058|KQ087367:433393-435062|KQ087373:546729-548769|KQ087373:896451-898001|KQ087365:2354054-2355609|KQ087367:469444-472189|KQ087359:2263883-2266350|KQ087365:557223-558575|KQ087363:141459-146109|KQ087360:1133782-1136067|KQ087369:814467-815786	http://amigo.geneontology.org/cgi-bin/amigo/term_details?term=GO:0097367
positive regulation of nucleobase-containing compound metabolic process	Gene Ontology	GO:0045935	1	91	0.955592	1	KQ087368:348761-349952	http://amigo.geneontology.org/cgi-bin/amigo/term_details?term=GO:0045935
mitochondrial inner membrane	Gene Ontology	GO:0005743	1	91	0.955592	1	KQ087361:67268-68159	http://amigo.geneontology.org/cgi-bin/amigo/term_details?term=GO:0005743
protein phosphorylation	Gene Ontology	GO:0006468	2	143	0.955965	1	KQ087367:433393-435062|KQ087359:370703-371359	http://amigo.geneontology.org/cgi-bin/amigo/term_details?term=GO:0006468
molecular function regulator	Gene Ontology	GO:0098772	1	92	0.957077	1	KQ087358:2016788-2019530	http://amigo.geneontology.org/cgi-bin/amigo/term_details?term=GO:0098772
phosphotransferase activity, alcohol group as acceptor	Gene Ontology	GO:0016773	2	144	0.957197	1	KQ087367:433393-435062|KQ087373:896451-898001	http://amigo.geneontology.org/cgi-bin/amigo/term_details?term=GO:0016773
multi-organism cellular process	Gene Ontology	GO:0044764	1	93	0.958512	1	KQ087365:1881927-1882409	http://amigo.geneontology.org/cgi-bin/amigo/term_details?term=GO:0044764
regulation of RNA metabolic process	Gene Ontology	GO:0051252	9	430	0.958648	1	KQ087374:229954-230815|KQ087358:1010971-1012453|KQ087373:1051779-1053812|KQ087363:358458-359253|KQ087359:59415-61245|KQ087359:2188715-2190753|KQ087368:348761-349952|KQ087370:28124-30599|KQ087367:266419-267265	http://amigo.geneontology.org/cgi-bin/amigo/term_details?term=GO:0051252
whole membrane	Gene Ontology	GO:0098805	3	192	0.959486	1	KQ087365:2085944-2087615|KQ087359:370703-371359|KQ087360:2538058-2539986	http://amigo.geneontology.org/cgi-bin/amigo/term_details?term=GO:0098805
mitotic spindle	Gene Ontology	GO:0072686	1	94	0.9599	1	KQ087375:1524875-1528764	http://amigo.geneontology.org/cgi-bin/amigo/term_details?term=GO:0072686
growth	Gene Ontology	GO:0040007	6	317	0.960058	1	KQ087376:132644-133020|KQ087362:799065-800463|KQ087375:1054635-1057874|KQ087373:434260-436619|KQ087369:804966-806718|KQ087363:575562-576797	http://amigo.geneontology.org/cgi-bin/amigo/term_details?term=GO:0040007
organelle inner membrane	Gene Ontology	GO:0019866	1	95	0.961241	1	KQ087361:67268-68159	http://amigo.geneontology.org/cgi-bin/amigo/term_details?term=GO:0019866
spindle pole body	Gene Ontology	GO:0005816	1	96	0.962538	1	KQ087375:1524875-1528764	http://amigo.geneontology.org/cgi-bin/amigo/term_details?term=GO:0005816
microtubule organizing center	Gene Ontology	GO:0005815	1	96	0.962538	1	KQ087375:1524875-1528764	http://amigo.geneontology.org/cgi-bin/amigo/term_details?term=GO:0005815
spindle pole	Gene Ontology	GO:0000922	1	96	0.962538	1	KQ087375:1524875-1528764	http://amigo.geneontology.org/cgi-bin/amigo/term_details?term=GO:0000922
primary metabolic process	Gene Ontology	GO:0044238	61	2162	0.963752	1	KQ087367:547555-549291|KQ087374:229954-230815|KQ087360:2488577-2491201|KQ087373:1095640-1096498|KQ087358:1010971-1012453|KQ087367:307111-310254|KQ087360:999535-1000354|KQ087363:1452640-1453806|KQ087359:2188715-2190753|KQ087364:854832-858221|KQ087358:2340201-2341169|KQ087359:370703-371359|KQ087368:348761-349952|KQ087359:1491741-1492919|KQ087370:28124-30599|KQ087367:1199056-1200381|KQ087368:347994-…	http://amigo.geneontology.org/cgi-bin/amigo/term_details?term=GO:0044238
cell communication	Gene Ontology	GO:0007154	5	283	0.964974	1	KQ087364:987665-989053|KQ087369:804966-806718|KQ087362:799065-800463|KQ087358:2016788-2019530|KQ087364:854832-858221	http://amigo.geneontology.org/cgi-bin/amigo/term_details?term=GO:0007154
negative regulation of cell cycle	Gene Ontology	GO:0045786	1	99	0.966174	1	KQ087364:987665-989053	http://amigo.geneontology.org/cgi-bin/amigo/term_details?term=GO:0045786
cell wall organization or biogenesis	Gene Ontology	GO:0071554	2	153	0.966895	1	KQ087360:999535-1000354|KQ087362:1747125-1748285	http://amigo.geneontology.org/cgi-bin/amigo/term_details?term=GO:0071554
cofactor biosynthetic process	Gene Ontology	GO:0051188	1	103	0.970481	1	KQ087368:348761-349952	http://amigo.geneontology.org/cgi-bin/amigo/term_details?term=GO:0051188
proteolysis involved in cellular protein catabolic process	Gene Ontology	GO:0051603	1	103	0.970481	1	KQ087375:1026593-1028945	http://amigo.geneontology.org/cgi-bin/amigo/term_details?term=GO:0051603
nucleoside-triphosphatase activity	Gene Ontology	GO:0017111	5	291	0.970666	1	KQ087373:541958-546058|KQ087373:480236-483672|KQ087363:141459-146109|KQ087360:1133782-1136067|KQ087375:1054635-1057874	http://amigo.geneontology.org/cgi-bin/amigo/term_details?term=GO:0017111
regulation of developmental process	Gene Ontology	GO:0050793	1	105	0.972425	1	KQ087364:987665-989053	http://amigo.geneontology.org/cgi-bin/amigo/term_details?term=GO:0050793
purine ribonucleoside triphosphate binding	Gene Ontology	GO:0035639	9	453	0.972855	1	KQ087373:541958-546058|KQ087367:433393-435062|KQ087373:546729-548769|KQ087373:896451-898001|KQ087365:2354054-2355609|KQ087367:469444-472189|KQ087359:2263883-2266350|KQ087363:141459-146109|KQ087360:1133782-1136067	http://amigo.geneontology.org/cgi-bin/amigo/term_details?term=GO:0035639
sporulation resulting in formation of a cellular spore	Gene Ontology	GO:0030435	2	160	0.972942	1	KQ087364:987665-989053|KQ087359:370703-371359	http://amigo.geneontology.org/cgi-bin/amigo/term_details?term=GO:0030435
cytoskeleton organization	Gene Ontology	GO:0007010	1	106	0.973348	1	KQ087359:370703-371359	http://amigo.geneontology.org/cgi-bin/amigo/term_details?term=GO:0007010
positive regulation of biological process	Gene Ontology	GO:0048518	5	296	0.973776	1	KQ087370:28124-30599|KQ087368:348761-349952|KQ087376:132644-133020|KQ087358:1010971-1012453|KQ087368:351403-352769	http://amigo.geneontology.org/cgi-bin/amigo/term_details?term=GO:0048518
regulation of nucleobase-containing compound metabolic process	Gene Ontology	GO:0019219	9	455	0.973853	1	KQ087374:229954-230815|KQ087358:1010971-1012453|KQ087373:1051779-1053812|KQ087363:358458-359253|KQ087359:59415-61245|KQ087359:2188715-2190753|KQ087368:348761-349952|KQ087370:28124-30599|KQ087367:266419-267265	http://amigo.geneontology.org/cgi-bin/amigo/term_details?term=GO:0019219
fungal-type cell wall organization or biogenesis	Gene Ontology	GO:0071852	1	107	0.974241	1	KQ087362:1747125-1748285	http://amigo.geneontology.org/cgi-bin/amigo/term_details?term=GO:0071852
protein kinase activity	Gene Ontology	GO:0004672	1	108	0.975104	1	KQ087367:433393-435062	http://amigo.geneontology.org/cgi-bin/amigo/term_details?term=GO:0004672
cellular protein catabolic process	Gene Ontology	GO:0044257	1	108	0.975104	1	KQ087375:1026593-1028945	http://amigo.geneontology.org/cgi-bin/amigo/term_details?term=GO:0044257
positive regulation of cellular process	Gene Ontology	GO:0048522	4	257	0.975913	1	KQ087368:348761-349952|KQ087376:132644-133020|KQ087358:1010971-1012453|KQ087368:351403-352769	http://amigo.geneontology.org/cgi-bin/amigo/term_details?term=GO:0048522
single-organism intracellular transport	Gene Ontology	GO:1902582	1	109	0.975938	1	KQ087368:347994-348672	http://amigo.geneontology.org/cgi-bin/amigo/term_details?term=GO:1902582
purine ribonucleoside binding	Gene Ontology	GO:0032550	9	460	0.976203	1	KQ087373:541958-546058|KQ087367:433393-435062|KQ087373:546729-548769|KQ087373:896451-898001|KQ087365:2354054-2355609|KQ087367:469444-472189|KQ087359:2263883-2266350|KQ087363:141459-146109|KQ087360:1133782-1136067	http://amigo.geneontology.org/cgi-bin/amigo/term_details?term=GO:0032550
ribonucleoside binding	Gene Ontology	GO:0032549	9	460	0.976203	1	KQ087373:541958-546058|KQ087367:433393-435062|KQ087373:546729-548769|KQ087373:896451-898001|KQ087365:2354054-2355609|KQ087367:469444-472189|KQ087359:2263883-2266350|KQ087363:141459-146109|KQ087360:1133782-1136067	http://amigo.geneontology.org/cgi-bin/amigo/term_details?term=GO:0032549
purine nucleoside binding	Gene Ontology	GO:0001883	9	460	0.976203	1	KQ087373:541958-546058|KQ087367:433393-435062|KQ087373:546729-548769|KQ087373:896451-898001|KQ087365:2354054-2355609|KQ087367:469444-472189|KQ087359:2263883-2266350|KQ087363:141459-146109|KQ087360:1133782-1136067	http://amigo.geneontology.org/cgi-bin/amigo/term_details?term=GO:0001883
purine ribonucleotide binding	Gene Ontology	GO:0032555	9	460	0.976203	1	KQ087373:541958-546058|KQ087367:433393-435062|KQ087373:546729-548769|KQ087373:896451-898001|KQ087365:2354054-2355609|KQ087367:469444-472189|KQ087359:2263883-2266350|KQ087363:141459-146109|KQ087360:1133782-1136067	http://amigo.geneontology.org/cgi-bin/amigo/term_details?term=GO:0032555
nucleoside binding	Gene Ontology	GO:0001882	9	461	0.97665	1	KQ087373:541958-546058|KQ087367:433393-435062|KQ087373:546729-548769|KQ087373:896451-898001|KQ087365:2354054-2355609|KQ087367:469444-472189|KQ087359:2263883-2266350|KQ087363:141459-146109|KQ087360:1133782-1136067	http://amigo.geneontology.org/cgi-bin/amigo/term_details?term=GO:0001882
purine nucleotide binding	Gene Ontology	GO:0017076	9	462	0.977089	1	KQ087373:541958-546058|KQ087367:433393-435062|KQ087373:546729-548769|KQ087373:896451-898001|KQ087365:2354054-2355609|KQ087367:469444-472189|KQ087359:2263883-2266350|KQ087363:141459-146109|KQ087360:1133782-1136067	http://amigo.geneontology.org/cgi-bin/amigo/term_details?term=GO:0017076
regulation of cellular protein metabolic process	Gene Ontology	GO:0032268	1	111	0.977523	1	KQ087359:370703-371359	http://amigo.geneontology.org/cgi-bin/amigo/term_details?term=GO:0032268
regulation of cellular biosynthetic process	Gene Ontology	GO:0031326	10	502	0.977843	1	KQ087374:229954-230815|KQ087358:1010971-1012453|KQ087373:1051779-1053812|KQ087363:358458-359253|KQ087359:59415-61245|KQ087359:2188715-2190753|KQ087368:348761-349952|KQ087370:28124-30599|KQ087367:266419-267265|KQ087368:351403-352769	http://amigo.geneontology.org/cgi-bin/amigo/term_details?term=GO:0031326
cellular protein complex assembly	Gene Ontology	GO:0043623	1	112	0.978276	1	KQ087361:67268-68159	http://amigo.geneontology.org/cgi-bin/amigo/term_details?term=GO:0043623
hydrolase activity, acting on acid anhydrides, in phosphorus-containing anhydrides	Gene Ontology	GO:0016818	5	306	0.9791	1	KQ087373:541958-546058|KQ087373:480236-483672|KQ087363:141459-146109|KQ087360:1133782-1136067|KQ087375:1054635-1057874	http://amigo.geneontology.org/cgi-bin/amigo/term_details?term=GO:0016818
pyrophosphatase activity	Gene Ontology	GO:0016462	5	306	0.9791	1	KQ087373:541958-546058|KQ087373:480236-483672|KQ087363:141459-146109|KQ087360:1133782-1136067|KQ087375:1054635-1057874	http://amigo.geneontology.org/cgi-bin/amigo/term_details?term=GO:0016462
cell differentiation	Gene Ontology	GO:0030154	2	169	0.979169	1	KQ087364:987665-989053|KQ087359:370703-371359	http://amigo.geneontology.org/cgi-bin/amigo/term_details?term=GO:0030154
regulation of gene expression	Gene Ontology	GO:0010468	9	468	0.979567	1	KQ087374:229954-230815|KQ087358:1010971-1012453|KQ087373:1051779-1053812|KQ087363:358458-359253|KQ087359:59415-61245|KQ087359:2188715-2190753|KQ087368:348761-349952|KQ087370:28124-30599|KQ087367:266419-267265	http://amigo.geneontology.org/cgi-bin/amigo/term_details?term=GO:0010468
hydrolase activity, acting on acid anhydrides	Gene Ontology	GO:0016817	5	307	0.979573	1	KQ087373:541958-546058|KQ087373:480236-483672|KQ087363:141459-146109|KQ087360:1133782-1136067|KQ087375:1054635-1057874	http://amigo.geneontology.org/cgi-bin/amigo/term_details?term=GO:0016817
sexual sporulation	Gene Ontology	GO:0034293	1	114	0.979708	1	KQ087364:987665-989053	http://amigo.geneontology.org/cgi-bin/amigo/term_details?term=GO:0034293
sexual sporulation resulting in formation of a cellular spore	Gene Ontology	GO:0043935	1	114	0.979708	1	KQ087364:987665-989053	http://amigo.geneontology.org/cgi-bin/amigo/term_details?term=GO:0043935
biosynthetic process	Gene Ontology	GO:0009058	35	1382	0.980148	1	KQ087358:1680543-1681945|KQ087374:229954-230815|KQ087373:1095640-1096498|KQ087358:1010971-1012453|KQ087358:1033352-1034924|KQ087363:1452640-1453806|KQ087359:2188715-2190753|KQ087368:348761-349952|KQ087370:82247-83719|KQ087370:28124-30599|KQ087368:410167-412357|KQ087362:1157172-1159141|KQ087358:1013167-1014595|KQ087368:360409-362046|KQ087358:1003501-1007320|KQ087359:59415-61245|KQ087363:575562-576…	http://amigo.geneontology.org/cgi-bin/amigo/term_details?term=GO:0009058
regulation of biosynthetic process	Gene Ontology	GO:0009889	10	509	0.980538	1	KQ087374:229954-230815|KQ087358:1010971-1012453|KQ087373:1051779-1053812|KQ087363:358458-359253|KQ087359:59415-61245|KQ087359:2188715-2190753|KQ087368:348761-349952|KQ087370:28124-30599|KQ087367:266419-267265|KQ087368:351403-352769	http://amigo.geneontology.org/cgi-bin/amigo/term_details?term=GO:0009889
mitochondrial envelope	Gene Ontology	GO:0005740	2	172	0.980918	1	KQ087376:132644-133020|KQ087361:67268-68159	http://amigo.geneontology.org/cgi-bin/amigo/term_details?term=GO:0005740
regulation of cellular macromolecule biosynthetic process	Gene Ontology	GO:2000112	9	472	0.981081	1	KQ087374:229954-230815|KQ087358:1010971-1012453|KQ087373:1051779-1053812|KQ087363:358458-359253|KQ087359:59415-61245|KQ087359:2188715-2190753|KQ087368:348761-349952|KQ087370:28124-30599|KQ087367:266419-267265	http://amigo.geneontology.org/cgi-bin/amigo/term_details?term=GO:2000112
regulation of macromolecule biosynthetic process	Gene Ontology	GO:0010556	9	472	0.981081	1	KQ087374:229954-230815|KQ087358:1010971-1012453|KQ087373:1051779-1053812|KQ087363:358458-359253|KQ087359:59415-61245|KQ087359:2188715-2190753|KQ087368:348761-349952|KQ087370:28124-30599|KQ087367:266419-267265	http://amigo.geneontology.org/cgi-bin/amigo/term_details?term=GO:0010556
regulation of protein metabolic process	Gene Ontology	GO:0051246	1	117	0.981681	1	KQ087359:370703-371359	http://amigo.geneontology.org/cgi-bin/amigo/term_details?term=GO:0051246
protein catabolic process	Gene Ontology	GO:0030163	1	117	0.981681	1	KQ087375:1026593-1028945	http://amigo.geneontology.org/cgi-bin/amigo/term_details?term=GO:0030163
heterocycle metabolic process	Gene Ontology	GO:0046483	29	1190	0.982345	1	KQ087374:229954-230815|KQ087358:1010971-1012453|KQ087363:1452640-1453806|KQ087360:1535766-1537176|KQ087368:348761-349952|KQ087370:82247-83719|KQ087370:28124-30599|KQ087358:2020243-2020733|KQ087362:1157172-1159141|KQ087358:1013167-1014595|KQ087373:518820-520652|KQ087359:59415-61245|KQ087358:774516-776073|KQ087363:1649213-1649693|KQ087363:575562-576797|KQ087367:266419-267265|KQ087368:351403-352769|…	http://amigo.geneontology.org/cgi-bin/amigo/term_details?term=GO:0046483
cellular process	Gene Ontology	GO:0009987	80	2833	0.983176	1	KQ087364:987665-989053|KQ087367:547555-549291|KQ087374:229954-230815|KQ087359:370703-371359|KQ087373:1095640-1096498|KQ087358:1010971-1012453|KQ087367:307111-310254|KQ087370:28124-30599|KQ087358:1033352-1034924|KQ087363:1452640-1453806|KQ087359:2188715-2190753|KQ087364:854832-858221|KQ087367:423921-426010|KQ087368:348761-349952|KQ087370:82247-83719|KQ087360:2538058-2539986|KQ087359:2263883-226635…	http://amigo.geneontology.org/cgi-bin/amigo/term_details?term=GO:0009987
spindle	Gene Ontology	GO:0005819	1	120	0.983463	1	KQ087375:1524875-1528764	http://amigo.geneontology.org/cgi-bin/amigo/term_details?term=GO:0005819
organonitrogen compound biosynthetic process	Gene Ontology	GO:1901566	9	482	0.984427	1	KQ087376:132644-133020|KQ087358:1013167-1014595|KQ087358:1010971-1012453|KQ087358:1003501-1007320|KQ087358:1029916-1031545|KQ087358:1035226-1036289|KQ087358:1028456-1029328|KQ087358:1016612-1023117|KQ087363:575562-576797	http://amigo.geneontology.org/cgi-bin/amigo/term_details?term=GO:1901566
protein targeting	Gene Ontology	GO:0006605	1	122	0.984554	1	KQ087368:347994-348672	http://amigo.geneontology.org/cgi-bin/amigo/term_details?term=GO:0006605
DNA repair	Gene Ontology	GO:0006281	1	123	0.985072	1	KQ087367:469444-472189	http://amigo.geneontology.org/cgi-bin/amigo/term_details?term=GO:0006281
establishment of protein localization to organelle	Gene Ontology	GO:0072594	1	123	0.985072	1	KQ087368:347994-348672	http://amigo.geneontology.org/cgi-bin/amigo/term_details?term=GO:0072594
reproductive system development	Gene Ontology	GO:0061458	1	124	0.985573	1	KQ087365:1881927-1882409	http://amigo.geneontology.org/cgi-bin/amigo/term_details?term=GO:0061458
reproductive structure development	Gene Ontology	GO:0048608	1	124	0.985573	1	KQ087365:1881927-1882409	http://amigo.geneontology.org/cgi-bin/amigo/term_details?term=GO:0048608
animal organ development	Gene Ontology	GO:0048513	1	124	0.985573	1	KQ087365:1881927-1882409	http://amigo.geneontology.org/cgi-bin/amigo/term_details?term=GO:0048513
spore-bearing organ development	Gene Ontology	GO:0075259	1	124	0.985573	1	KQ087365:1881927-1882409	http://amigo.geneontology.org/cgi-bin/amigo/term_details?term=GO:0075259
system development	Gene Ontology	GO:0048731	1	124	0.985573	1	KQ087365:1881927-1882409	http://amigo.geneontology.org/cgi-bin/amigo/term_details?term=GO:0048731
transferase activity, transferring phosphorus-containing groups	Gene Ontology	GO:0016772	3	232	0.985758	1	KQ087359:2263883-2266350|KQ087373:896451-898001|KQ087367:433393-435062	http://amigo.geneontology.org/cgi-bin/amigo/term_details?term=GO:0016772
aromatic compound biosynthetic process	Gene Ontology	GO:0019438	15	714	0.985871	1	KQ087374:229954-230815|KQ087365:2159709-2160555|KQ087358:1010971-1012453|KQ087373:1051779-1053812|KQ087363:358458-359253|KQ087370:28124-30599|KQ087359:2188715-2190753|KQ087368:346783-347575|KQ087360:171314-172508|KQ087368:348761-349952|KQ087370:82247-83719|KQ087359:59415-61245|KQ087363:575562-576797|KQ087367:266419-267265|KQ087368:351403-352769	http://amigo.geneontology.org/cgi-bin/amigo/term_details?term=GO:0019438
organophosphate biosynthetic process	Gene Ontology	GO:0090407	1	125	0.986057	1	KQ087359:225790-227494	http://amigo.geneontology.org/cgi-bin/amigo/term_details?term=GO:0090407
positive regulation of macromolecule metabolic process	Gene Ontology	GO:0010604	1	125	0.986057	1	KQ087368:348761-349952	http://amigo.geneontology.org/cgi-bin/amigo/term_details?term=GO:0010604
multicellular organism development	Gene Ontology	GO:0007275	1	125	0.986057	1	KQ087365:1881927-1882409	http://amigo.geneontology.org/cgi-bin/amigo/term_details?term=GO:0007275
mitochondrion organization	Gene Ontology	GO:0007005	1	126	0.986525	1	KQ087361:67268-68159	http://amigo.geneontology.org/cgi-bin/amigo/term_details?term=GO:0007005
multicellular organismal process	Gene Ontology	GO:0032501	1	127	0.986977	1	KQ087365:1881927-1882409	http://amigo.geneontology.org/cgi-bin/amigo/term_details?term=GO:0032501
single-multicellular organism process	Gene Ontology	GO:0044707	1	127	0.986977	1	KQ087365:1881927-1882409	http://amigo.geneontology.org/cgi-bin/amigo/term_details?term=GO:0044707
regulation of cellular metabolic process	Gene Ontology	GO:0031323	11	575	0.988411	1	KQ087374:229954-230815|KQ087359:370703-371359|KQ087358:1010971-1012453|KQ087373:1051779-1053812|KQ087363:358458-359253|KQ087359:59415-61245|KQ087359:2188715-2190753|KQ087368:348761-349952|KQ087370:28124-30599|KQ087367:266419-267265|KQ087368:351403-352769	http://amigo.geneontology.org/cgi-bin/amigo/term_details?term=GO:0031323
regulation of cell cycle process	Gene Ontology	GO:0010564	1	131	0.988639	1	KQ087364:987665-989053	http://amigo.geneontology.org/cgi-bin/amigo/term_details?term=GO:0010564
microtubule cytoskeleton	Gene Ontology	GO:0015630	1	132	0.989021	1	KQ087375:1524875-1528764	http://amigo.geneontology.org/cgi-bin/amigo/term_details?term=GO:0015630
multi-organism process	Gene Ontology	GO:0051704	5	334	0.989131	1	KQ087364:987665-989053|KQ087368:22419-24214|KQ087359:370703-371359|KQ087375:1083141-1084855|KQ087365:1881927-1882409	http://amigo.geneontology.org/cgi-bin/amigo/term_details?term=GO:0051704
nucleic acid-templated transcription	Gene Ontology	GO:0097659	9	502	0.989543	1	KQ087374:229954-230815|KQ087358:1010971-1012453|KQ087373:1051779-1053812|KQ087363:358458-359253|KQ087359:59415-61245|KQ087359:2188715-2190753|KQ087368:348761-349952|KQ087370:28124-30599|KQ087367:266419-267265	http://amigo.geneontology.org/cgi-bin/amigo/term_details?term=GO:0097659
transcription, DNA-templated	Gene Ontology	GO:0006351	9	502	0.989543	1	KQ087374:229954-230815|KQ087358:1010971-1012453|KQ087373:1051779-1053812|KQ087363:358458-359253|KQ087359:59415-61245|KQ087359:2188715-2190753|KQ087368:348761-349952|KQ087370:28124-30599|KQ087367:266419-267265	http://amigo.geneontology.org/cgi-bin/amigo/term_details?term=GO:0006351
RNA biosynthetic process	Gene Ontology	GO:0032774	9	505	0.99016	1	KQ087374:229954-230815|KQ087358:1010971-1012453|KQ087373:1051779-1053812|KQ087363:358458-359253|KQ087359:59415-61245|KQ087359:2188715-2190753|KQ087368:348761-349952|KQ087370:28124-30599|KQ087367:266419-267265	http://amigo.geneontology.org/cgi-bin/amigo/term_details?term=GO:0032774
regulation of nitrogen compound metabolic process	Gene Ontology	GO:0051171	9	506	0.990357	1	KQ087374:229954-230815|KQ087358:1010971-1012453|KQ087373:1051779-1053812|KQ087363:358458-359253|KQ087359:59415-61245|KQ087359:2188715-2190753|KQ087368:348761-349952|KQ087370:28124-30599|KQ087367:266419-267265	http://amigo.geneontology.org/cgi-bin/amigo/term_details?term=GO:0051171
organic cyclic compound metabolic process	Gene Ontology	GO:1901360	30	1269	0.990441	1	KQ087374:229954-230815|KQ087358:1010971-1012453|KQ087363:1452640-1453806|KQ087360:1535766-1537176|KQ087368:348761-349952|KQ087370:82247-83719|KQ087370:28124-30599|KQ087368:410167-412357|KQ087358:2020243-2020733|KQ087362:1157172-1159141|KQ087358:1013167-1014595|KQ087373:518820-520652|KQ087359:59415-61245|KQ087358:774516-776073|KQ087363:1649213-1649693|KQ087363:575562-576797|KQ087367:266419-267265|…	http://amigo.geneontology.org/cgi-bin/amigo/term_details?term=GO:1901360
negative regulation of biological process	Gene Ontology	GO:0048519	4	295	0.990619	1	KQ087364:987665-989053|KQ087376:132644-133020|KQ087359:370703-371359|KQ087368:347994-348672	http://amigo.geneontology.org/cgi-bin/amigo/term_details?term=GO:0048519
structural molecule activity	Gene Ontology	GO:0005198	1	137	0.990745	1	KQ087367:220174-220731	http://amigo.geneontology.org/cgi-bin/amigo/term_details?term=GO:0005198
regulation of macromolecule metabolic process	Gene Ontology	GO:0060255	10	548	0.990798	1	KQ087374:229954-230815|KQ087359:370703-371359|KQ087358:1010971-1012453|KQ087373:1051779-1053812|KQ087363:358458-359253|KQ087359:59415-61245|KQ087359:2188715-2190753|KQ087368:348761-349952|KQ087370:28124-30599|KQ087367:266419-267265	http://amigo.geneontology.org/cgi-bin/amigo/term_details?term=GO:0060255
membrane part	Gene Ontology	GO:0044425	14	703	0.991026	1	KQ087367:1577327-1579154|KQ087359:370703-371359|KQ087368:113066-114653|KQ087361:67268-68159|KQ087358:1029916-1031545|KQ087359:1411400-1413175|KQ087360:2390040-2391787|KQ087373:541958-546058|KQ087365:2085944-2087615|KQ087363:68341-70378|KQ087364:892758-894251|KQ087375:1054635-1057874|KQ087363:141459-146109|KQ087373:480236-483672	http://amigo.geneontology.org/cgi-bin/amigo/term_details?term=GO:0044425
regulation of transcription from RNA polymerase II promoter	Gene Ontology	GO:0006357	1	139	0.991356	1	KQ087368:348761-349952	http://amigo.geneontology.org/cgi-bin/amigo/term_details?term=GO:0006357
intracellular signal transduction	Gene Ontology	GO:0035556	1	139	0.991356	1	KQ087358:2016788-2019530	http://amigo.geneontology.org/cgi-bin/amigo/term_details?term=GO:0035556
RNA binding	Gene Ontology	GO:0003723	2	201	0.991924	1	KQ087363:1649213-1649693|KQ087365:1755454-1755916	http://amigo.geneontology.org/cgi-bin/amigo/term_details?term=GO:0003723
regulation of metabolic process	Gene Ontology	GO:0019222	11	595	0.992099	1	KQ087374:229954-230815|KQ087359:370703-371359|KQ087358:1010971-1012453|KQ087373:1051779-1053812|KQ087363:358458-359253|KQ087359:59415-61245|KQ087359:2188715-2190753|KQ087368:348761-349952|KQ087370:28124-30599|KQ087367:266419-267265|KQ087368:351403-352769	http://amigo.geneontology.org/cgi-bin/amigo/term_details?term=GO:0019222
regulation of primary metabolic process	Gene Ontology	GO:0080090	10	557	0.992306	1	KQ087374:229954-230815|KQ087359:370703-371359|KQ087358:1010971-1012453|KQ087373:1051779-1053812|KQ087363:358458-359253|KQ087359:59415-61245|KQ087359:2188715-2190753|KQ087368:348761-349952|KQ087370:28124-30599|KQ087367:266419-267265	http://amigo.geneontology.org/cgi-bin/amigo/term_details?term=GO:0080090
negative regulation of macromolecule metabolic process	Gene Ontology	GO:0010605	1	145	0.99296	1	KQ087359:370703-371359	http://amigo.geneontology.org/cgi-bin/amigo/term_details?term=GO:0010605
endoplasmic reticulum	Gene Ontology	GO:0005783	4	307	0.9931	1	KQ087363:272557-274522|KQ087359:370703-371359|KQ087375:1524875-1528764|KQ087360:2538058-2539986	http://amigo.geneontology.org/cgi-bin/amigo/term_details?term=GO:0005783
cellular macromolecule catabolic process	Gene Ontology	GO:0044265	1	146	0.993196	1	KQ087375:1026593-1028945	http://amigo.geneontology.org/cgi-bin/amigo/term_details?term=GO:0044265
bounding membrane of organelle	Gene Ontology	GO:0098588	2	208	0.993457	1	KQ087365:2085944-2087615|KQ087360:2538058-2539986	http://amigo.geneontology.org/cgi-bin/amigo/term_details?term=GO:0098588
protein complex biogenesis	Gene Ontology	GO:0070271	1	148	0.993646	1	KQ087361:67268-68159	http://amigo.geneontology.org/cgi-bin/amigo/term_details?term=GO:0070271
protein complex assembly	Gene Ontology	GO:0006461	1	148	0.993646	1	KQ087361:67268-68159	http://amigo.geneontology.org/cgi-bin/amigo/term_details?term=GO:0006461
protein transport	Gene Ontology	GO:0015031	2	209	0.993651	1	KQ087359:370703-371359|KQ087368:347994-348672	http://amigo.geneontology.org/cgi-bin/amigo/term_details?term=GO:0015031
regulation of cellular process	Gene Ontology	GO:0050794	17	836	0.993808	1	KQ087364:987665-989053|KQ087374:229954-230815|KQ087376:132644-133020|KQ087358:1010971-1012453|KQ087373:1051779-1053812|KQ087363:358458-359253|KQ087362:3076957-3078700|KQ087359:2188715-2190753|KQ087359:370703-371359|KQ087368:348761-349952|KQ087358:2016788-2019530|KQ087359:59415-61245|KQ087370:28124-30599|KQ087366:1682756-1683611|KQ087365:557223-558575|KQ087367:266419-267265|KQ087368:351403-352769	http://amigo.geneontology.org/cgi-bin/amigo/term_details?term=GO:0050794
mitochondrial membrane	Gene Ontology	GO:0031966	1	149	0.99386	1	KQ087361:67268-68159	http://amigo.geneontology.org/cgi-bin/amigo/term_details?term=GO:0031966
membrane protein complex	Gene Ontology	GO:0098796	1	150	0.994066	1	KQ087361:67268-68159	http://amigo.geneontology.org/cgi-bin/amigo/term_details?term=GO:0098796
ribosome	Gene Ontology	GO:0005840	1	150	0.994066	1	KQ087369:435390-436842	http://amigo.geneontology.org/cgi-bin/amigo/term_details?term=GO:0005840
negative regulation of cellular metabolic process	Gene Ontology	GO:0031324	1	150	0.994066	1	KQ087359:370703-371359	http://amigo.geneontology.org/cgi-bin/amigo/term_details?term=GO:0031324
developmental process involved in reproduction	Gene Ontology	GO:0003006	2	213	0.994374	1	KQ087364:987665-989053|KQ087365:1881927-1882409	http://amigo.geneontology.org/cgi-bin/amigo/term_details?term=GO:0003006
establishment of protein localization	Gene Ontology	GO:0045184	2	213	0.994374	1	KQ087359:370703-371359|KQ087368:347994-348672	http://amigo.geneontology.org/cgi-bin/amigo/term_details?term=GO:0045184
cellular response to DNA damage stimulus	Gene Ontology	GO:0006974	1	152	0.994459	1	KQ087367:469444-472189	http://amigo.geneontology.org/cgi-bin/amigo/term_details?term=GO:0006974
asexual sporulation	Gene Ontology	GO:0030436	1	153	0.994645	1	KQ087359:370703-371359	http://amigo.geneontology.org/cgi-bin/amigo/term_details?term=GO:0030436
vesicle-mediated transport	Gene Ontology	GO:0016192	1	153	0.994645	1	KQ087376:132644-133020	http://amigo.geneontology.org/cgi-bin/amigo/term_details?term=GO:0016192
biological regulation	Gene Ontology	GO:0065007	22	1028	0.994726	1	KQ087364:987665-989053|KQ087374:229954-230815|KQ087359:370703-371359|KQ087358:1010971-1012453|KQ087359:2188715-2190753|KQ087368:348761-349952|KQ087370:28124-30599|KQ087365:557223-558575|KQ087368:347994-348672|KQ087362:3076957-3078700|KQ087359:59415-61245|KQ087367:266419-267265|KQ087368:351403-352769|KQ087363:358458-359253|KQ087358:2016788-2019530|KQ087366:1682756-1683611|KQ087376:132644-133020|KQ…	http://amigo.geneontology.org/cgi-bin/amigo/term_details?term=GO:0065007
single-organism organelle organization	Gene Ontology	GO:1902589	2	218	0.995165	1	KQ087376:132644-133020|KQ087359:370703-371359	http://amigo.geneontology.org/cgi-bin/amigo/term_details?term=GO:1902589
negative regulation of metabolic process	Gene Ontology	GO:0009892	1	157	0.995331	1	KQ087359:370703-371359	http://amigo.geneontology.org/cgi-bin/amigo/term_details?term=GO:0009892
meiotic cell cycle process	Gene Ontology	GO:1903046	1	160	0.995787	1	KQ087364:987665-989053	http://amigo.geneontology.org/cgi-bin/amigo/term_details?term=GO:1903046
sporulation	Gene Ontology	GO:0043934	2	225	0.996092	1	KQ087364:987665-989053|KQ087359:370703-371359	http://amigo.geneontology.org/cgi-bin/amigo/term_details?term=GO:0043934
protein localization to organelle	Gene Ontology	GO:0033365	1	163	0.996198	1	KQ087368:347994-348672	http://amigo.geneontology.org/cgi-bin/amigo/term_details?term=GO:0033365
regulation of cell cycle	Gene Ontology	GO:0051726	1	164	0.996326	1	KQ087364:987665-989053	http://amigo.geneontology.org/cgi-bin/amigo/term_details?term=GO:0051726
mitochondrion	Gene Ontology	GO:0005739	9	556	0.996626	1	KQ087367:547555-549291|KQ087376:132644-133020|KQ087361:67268-68159|KQ087362:799065-800463|KQ087375:1006633-1007221|KQ087359:370703-371359|KQ087367:1513969-1514723|KQ087369:435390-436842|KQ087375:702699-704464	http://amigo.geneontology.org/cgi-bin/amigo/term_details?term=GO:0005739
meiotic cell cycle	Gene Ontology	GO:0051321	1	168	0.996797	1	KQ087364:987665-989053	http://amigo.geneontology.org/cgi-bin/amigo/term_details?term=GO:0051321
asexual reproduction	Gene Ontology	GO:0019954	1	169	0.996905	1	KQ087359:370703-371359	http://amigo.geneontology.org/cgi-bin/amigo/term_details?term=GO:0019954
cellular developmental process	Gene Ontology	GO:0048869	2	234	0.997032	1	KQ087364:987665-989053|KQ087359:370703-371359	http://amigo.geneontology.org/cgi-bin/amigo/term_details?term=GO:0048869
anatomical structure formation involved in morphogenesis	Gene Ontology	GO:0048646	2	234	0.997032	1	KQ087364:987665-989053|KQ087359:370703-371359	http://amigo.geneontology.org/cgi-bin/amigo/term_details?term=GO:0048646
regulation of biological process	Gene Ontology	GO:0050789	18	915	0.997036	1	KQ087364:987665-989053|KQ087374:229954-230815|KQ087376:132644-133020|KQ087358:1010971-1012453|KQ087373:1051779-1053812|KQ087363:358458-359253|KQ087362:3076957-3078700|KQ087359:2188715-2190753|KQ087359:370703-371359|KQ087368:348761-349952|KQ087358:2016788-2019530|KQ087359:59415-61245|KQ087370:28124-30599|KQ087366:1682756-1683611|KQ087365:557223-558575|KQ087368:347994-348672|KQ087367:266419-267265|…	http://amigo.geneontology.org/cgi-bin/amigo/term_details?term=GO:0050789
transcription from RNA polymerase II promoter	Gene Ontology	GO:0006366	1	172	0.997208	1	KQ087368:348761-349952	http://amigo.geneontology.org/cgi-bin/amigo/term_details?term=GO:0006366
cellular aromatic compound metabolic process	Gene Ontology	GO:0006725	25	1181	0.997476	1	KQ087374:229954-230815|KQ087358:1010971-1012453|KQ087363:1452640-1453806|KQ087360:1535766-1537176|KQ087368:348761-349952|KQ087370:82247-83719|KQ087370:28124-30599|KQ087373:643298-644630|KQ087358:2020243-2020733|KQ087362:1157172-1159141|KQ087359:59415-61245|KQ087358:774516-776073|KQ087363:1649213-1649693|KQ087363:575562-576797|KQ087367:266419-267265|KQ087368:351403-352769|KQ087365:2159709-2160555|…	http://amigo.geneontology.org/cgi-bin/amigo/term_details?term=GO:0006725
signal transduction	Gene Ontology	GO:0007165	1	175	0.997481	1	KQ087358:2016788-2019530	http://amigo.geneontology.org/cgi-bin/amigo/term_details?term=GO:0007165
single organism signaling	Gene Ontology	GO:0044700	1	175	0.997481	1	KQ087358:2016788-2019530	http://amigo.geneontology.org/cgi-bin/amigo/term_details?term=GO:0044700
signaling	Gene Ontology	GO:0023052	1	175	0.997481	1	KQ087358:2016788-2019530	http://amigo.geneontology.org/cgi-bin/amigo/term_details?term=GO:0023052
cytoskeletal part	Gene Ontology	GO:0044430	1	177	0.997648	1	KQ087375:1524875-1528764	http://amigo.geneontology.org/cgi-bin/amigo/term_details?term=GO:0044430
single organism reproductive process	Gene Ontology	GO:0044702	1	178	0.997727	1	KQ087364:987665-989053	http://amigo.geneontology.org/cgi-bin/amigo/term_details?term=GO:0044702
cytoskeleton	Gene Ontology	GO:0005856	1	180	0.997878	1	KQ087375:1524875-1528764	http://amigo.geneontology.org/cgi-bin/amigo/term_details?term=GO:0005856
organelle envelope	Gene Ontology	GO:0031967	2	246	0.997948	1	KQ087376:132644-133020|KQ087361:67268-68159	http://amigo.geneontology.org/cgi-bin/amigo/term_details?term=GO:0031967
envelope	Gene Ontology	GO:0031975	2	247	0.99801	1	KQ087376:132644-133020|KQ087361:67268-68159	http://amigo.geneontology.org/cgi-bin/amigo/term_details?term=GO:0031975
protein complex subunit organization	Gene Ontology	GO:0071822	1	185	0.998213	1	KQ087361:67268-68159	http://amigo.geneontology.org/cgi-bin/amigo/term_details?term=GO:0071822
organic substance biosynthetic process	Gene Ontology	GO:1901576	28	1314	0.998339	1	KQ087374:229954-230815|KQ087373:1095640-1096498|KQ087358:1010971-1012453|KQ087363:1452640-1453806|KQ087359:2188715-2190753|KQ087368:348761-349952|KQ087370:82247-83719|KQ087370:28124-30599|KQ087368:410167-412357|KQ087362:1157172-1159141|KQ087358:1013167-1014595|KQ087358:1003501-1007320|KQ087359:59415-61245|KQ087363:575562-576797|KQ087367:266419-267265|KQ087368:351403-352769|KQ087365:2159709-216055…	http://amigo.geneontology.org/cgi-bin/amigo/term_details?term=GO:1901576
intracellular protein transport	Gene Ontology	GO:0006886	1	188	0.998388	1	KQ087368:347994-348672	http://amigo.geneontology.org/cgi-bin/amigo/term_details?term=GO:0006886
mitochondrial part	Gene Ontology	GO:0044429	2	258	0.998585	1	KQ087376:132644-133020|KQ087361:67268-68159	http://amigo.geneontology.org/cgi-bin/amigo/term_details?term=GO:0044429
DNA metabolic process	Gene Ontology	GO:0006259	1	193	0.998642	1	KQ087367:469444-472189	http://amigo.geneontology.org/cgi-bin/amigo/term_details?term=GO:0006259
anatomical structure development	Gene Ontology	GO:0048856	3	319	0.998751	1	KQ087364:987665-989053|KQ087365:1881927-1882409|KQ087359:370703-371359	http://amigo.geneontology.org/cgi-bin/amigo/term_details?term=GO:0048856
developmental process	Gene Ontology	GO:0032502	4	372	0.998777	1	KQ087364:987665-989053|KQ087365:1881927-1882409|KQ087359:370703-371359|KQ087373:434260-436619	http://amigo.geneontology.org/cgi-bin/amigo/term_details?term=GO:0032502
negative regulation of cellular process	Gene Ontology	GO:0048523	2	265	0.998861	1	KQ087364:987665-989053|KQ087359:370703-371359	http://amigo.geneontology.org/cgi-bin/amigo/term_details?term=GO:0048523
cellular macromolecular complex assembly	Gene Ontology	GO:0034622	1	199	0.998895	1	KQ087361:67268-68159	http://amigo.geneontology.org/cgi-bin/amigo/term_details?term=GO:0034622
anatomical structure morphogenesis	Gene Ontology	GO:0009653	2	266	0.998896	1	KQ087364:987665-989053|KQ087359:370703-371359	http://amigo.geneontology.org/cgi-bin/amigo/term_details?term=GO:0009653
nucleobase-containing compound biosynthetic process	Gene Ontology	GO:0034654	9	607	0.998916	1	KQ087374:229954-230815|KQ087358:1010971-1012453|KQ087373:1051779-1053812|KQ087363:358458-359253|KQ087359:59415-61245|KQ087359:2188715-2190753|KQ087368:348761-349952|KQ087370:28124-30599|KQ087367:266419-267265	http://amigo.geneontology.org/cgi-bin/amigo/term_details?term=GO:0034654
organelle membrane	Gene Ontology	GO:0031090	3	325	0.998951	1	KQ087365:2085944-2087615|KQ087361:67268-68159|KQ087360:2538058-2539986	http://amigo.geneontology.org/cgi-bin/amigo/term_details?term=GO:0031090
cellular nitrogen compound biosynthetic process	Gene Ontology	GO:0044271	16	895	0.998977	1	KQ087374:229954-230815|KQ087358:1013167-1014595|KQ087358:1010971-1012453|KQ087373:1051779-1053812|KQ087363:358458-359253|KQ087358:1028456-1029328|KQ087358:1003501-1007320|KQ087359:2188715-2190753|KQ087358:1029916-1031545|KQ087358:1035226-1036289|KQ087359:59415-61245|KQ087370:28124-30599|KQ087368:348761-349952|KQ087358:1016612-1023117|KQ087363:575562-576797|KQ087367:266419-267265	http://amigo.geneontology.org/cgi-bin/amigo/term_details?term=GO:0044271
endomembrane system	Gene Ontology	GO:0012505	7	523	0.999015	1	KQ087363:272557-274522|KQ087363:999702-1001317|KQ087359:370703-371359|KQ087375:1524875-1528764|KQ087373:980127-981877|KQ087362:1587636-1589145|KQ087360:2538058-2539986	http://amigo.geneontology.org/cgi-bin/amigo/term_details?term=GO:0012505
cellular protein localization	Gene Ontology	GO:0034613	2	273	0.999113	1	KQ087359:370703-371359|KQ087368:347994-348672	http://amigo.geneontology.org/cgi-bin/amigo/term_details?term=GO:0034613
sexual reproduction	Gene Ontology	GO:0019953	1	207	0.999161	1	KQ087364:987665-989053	http://amigo.geneontology.org/cgi-bin/amigo/term_details?term=GO:0019953
multi-organism reproductive process	Gene Ontology	GO:0044703	1	207	0.999161	1	KQ087364:987665-989053	http://amigo.geneontology.org/cgi-bin/amigo/term_details?term=GO:0044703
intracellular transport	Gene Ontology	GO:0046907	2	275	0.999167	1	KQ087376:132644-133020|KQ087368:347994-348672	http://amigo.geneontology.org/cgi-bin/amigo/term_details?term=GO:0046907
protein binding	Gene Ontology	GO:0005515	2	275	0.999167	1	KQ087368:347994-348672|KQ087363:1793895-1795149	http://amigo.geneontology.org/cgi-bin/amigo/term_details?term=GO:0005515
cellular macromolecule localization	Gene Ontology	GO:0070727	2	276	0.999193	1	KQ087359:370703-371359|KQ087368:347994-348672	http://amigo.geneontology.org/cgi-bin/amigo/term_details?term=GO:0070727
cellular protein modification process	Gene Ontology	GO:0006464	4	389	0.999234	1	KQ087367:433393-435062|KQ087376:132644-133020|KQ087359:370703-371359|KQ087368:347994-348672	http://amigo.geneontology.org/cgi-bin/amigo/term_details?term=GO:0006464
protein modification process	Gene Ontology	GO:0036211	4	389	0.999234	1	KQ087367:433393-435062|KQ087376:132644-133020|KQ087359:370703-371359|KQ087368:347994-348672	http://amigo.geneontology.org/cgi-bin/amigo/term_details?term=GO:0036211
cellular nitrogen compound metabolic process	Gene Ontology	GO:0034641	27	1326	0.999263	1	KQ087374:229954-230815|KQ087358:1010971-1012453|KQ087363:1452640-1453806|KQ087359:2188715-2190753|KQ087368:348761-349952|KQ087370:28124-30599|KQ087367:1442764-1444280|KQ087358:2020243-2020733|KQ087362:1157172-1159141|KQ087358:1013167-1014595|KQ087373:518820-520652|KQ087358:1003501-1007320|KQ087359:59415-61245|KQ087358:774516-776073|KQ087363:1649213-1649693|KQ087363:575562-576797|KQ087367:266419-2…	http://amigo.geneontology.org/cgi-bin/amigo/term_details?term=GO:0034641
macromolecule metabolic process	Gene Ontology	GO:0043170	33	1545	0.999308	1	KQ087374:229954-230815|KQ087360:2488577-2491201|KQ087358:1010971-1012453|KQ087370:28124-30599|KQ087359:2188715-2190753|KQ087367:455950-456781|KQ087359:370703-371359|KQ087368:348761-349952|KQ087359:1491741-1492919|KQ087365:1666693-1668551|KQ087368:347994-348672|KQ087358:2020243-2020733|KQ087360:997178-998173|KQ087360:585536-586935|KQ087365:2099302-2100451|KQ087369:810603-811408|KQ087367:1556227-15…	http://amigo.geneontology.org/cgi-bin/amigo/term_details?term=GO:0043170
nucleic acid binding	Gene Ontology	GO:0003676	10	675	0.999389	1	KQ087374:229954-230815|KQ087373:1051779-1053812|KQ087363:358458-359253|KQ087359:59415-61245|KQ087359:2188715-2190753|KQ087368:348761-349952|KQ087370:28124-30599|KQ087367:469444-472189|KQ087363:1649213-1649693|KQ087365:1755454-1755916	http://amigo.geneontology.org/cgi-bin/amigo/term_details?term=GO:0003676
cellular biosynthetic process	Gene Ontology	GO:0044249	26	1301	0.999398	1	KQ087374:229954-230815|KQ087373:1095640-1096498|KQ087358:1010971-1012453|KQ087358:1033352-1034924|KQ087359:2188715-2190753|KQ087368:348761-349952|KQ087370:82247-83719|KQ087370:28124-30599|KQ087368:410167-412357|KQ087358:1013167-1014595|KQ087358:1003501-1007320|KQ087359:59415-61245|KQ087363:575562-576797|KQ087367:266419-267265|KQ087368:351403-352769|KQ087365:2159709-2160555|KQ087359:225790-227494|…	http://amigo.geneontology.org/cgi-bin/amigo/term_details?term=GO:0044249
nitrogen compound metabolic process	Gene Ontology	GO:0006807	32	1523	0.999448	1	KQ087374:229954-230815|KQ087358:1010971-1012453|KQ087363:1452640-1453806|KQ087359:2188715-2190753|KQ087367:423921-426010|KQ087368:348761-349952|KQ087370:28124-30599|KQ087367:1442764-1444280|KQ087358:2020243-2020733|KQ087362:1157172-1159141|KQ087358:1013167-1014595|KQ087373:518820-520652|KQ087358:1003501-1007320|KQ087359:59415-61245|KQ087358:774516-776073|KQ087363:1649213-1649693|KQ087363:575562-5…	http://amigo.geneontology.org/cgi-bin/amigo/term_details?term=GO:0006807
RNA processing	Gene Ontology	GO:0006396	1	223	0.999517	1	KQ087363:1649213-1649693	http://amigo.geneontology.org/cgi-bin/amigo/term_details?term=GO:0006396
single-organism developmental process	Gene Ontology	GO:0044767	3	352	0.999525	1	KQ087364:987665-989053|KQ087365:1881927-1882409|KQ087359:370703-371359	http://amigo.geneontology.org/cgi-bin/amigo/term_details?term=GO:0044767
protein localization	Gene Ontology	GO:0008104	2	295	0.999556	1	KQ087359:370703-371359|KQ087368:347994-348672	http://amigo.geneontology.org/cgi-bin/amigo/term_details?term=GO:0008104
establishment of localization in cell	Gene Ontology	GO:0051649	2	298	0.999596	1	KQ087376:132644-133020|KQ087368:347994-348672	http://amigo.geneontology.org/cgi-bin/amigo/term_details?term=GO:0051649
reproductive process	Gene Ontology	GO:0022414	2	299	0.999608	1	KQ087364:987665-989053|KQ087365:1881927-1882409	http://amigo.geneontology.org/cgi-bin/amigo/term_details?term=GO:0022414
macromolecular complex assembly	Gene Ontology	GO:0065003	1	235	0.99968	1	KQ087361:67268-68159	http://amigo.geneontology.org/cgi-bin/amigo/term_details?term=GO:0065003
reproduction	Gene Ontology	GO:0000003	3	368	0.999704	1	KQ087364:987665-989053|KQ087365:1881927-1882409|KQ087359:370703-371359	http://amigo.geneontology.org/cgi-bin/amigo/term_details?term=GO:0000003
RNA metabolic process	Gene Ontology	GO:0016070	11	768	0.999807	1	KQ087358:2020243-2020733|KQ087374:229954-230815|KQ087358:1010971-1012453|KQ087373:1051779-1053812|KQ087363:358458-359253|KQ087359:59415-61245|KQ087359:2188715-2190753|KQ087368:348761-349952|KQ087370:28124-30599|KQ087363:1649213-1649693|KQ087367:266419-267265	http://amigo.geneontology.org/cgi-bin/amigo/term_details?term=GO:0016070
macromolecule modification	Gene Ontology	GO:0043412	4	440	0.999818	1	KQ087367:433393-435062|KQ087376:132644-133020|KQ087359:370703-371359|KQ087368:347994-348672	http://amigo.geneontology.org/cgi-bin/amigo/term_details?term=GO:0043412
macromolecule localization	Gene Ontology	GO:0033036	2	330	0.999854	1	KQ087359:370703-371359|KQ087368:347994-348672	http://amigo.geneontology.org/cgi-bin/amigo/term_details?term=GO:0033036
cellular component assembly	Gene Ontology	GO:0022607	2	332	0.999863	1	KQ087359:370703-371359|KQ087361:67268-68159	http://amigo.geneontology.org/cgi-bin/amigo/term_details?term=GO:0022607
protein metabolic process	Gene Ontology	GO:0019538	9	695	0.999866	1	KQ087375:1026593-1028945|KQ087360:2488577-2491201|KQ087360:585536-586935|KQ087367:433393-435062|KQ087376:132644-133020|KQ087359:370703-371359|KQ087374:219550-220229|KQ087365:1666693-1668551|KQ087368:347994-348672	http://amigo.geneontology.org/cgi-bin/amigo/term_details?term=GO:0019538
cellular localization	Gene Ontology	GO:0051641	3	395	0.999869	1	KQ087376:132644-133020|KQ087359:370703-371359|KQ087368:347994-348672	http://amigo.geneontology.org/cgi-bin/amigo/term_details?term=GO:0051641
nucleobase-containing compound metabolic process	Gene Ontology	GO:0006139	17	1053	0.999911	1	KQ087358:2020243-2020733|KQ087374:229954-230815|KQ087362:1157172-1159141|KQ087358:1010971-1012453|KQ087373:1051779-1053812|KQ087363:358458-359253|KQ087370:28124-30599|KQ087363:1452640-1453806|KQ087359:2188715-2190753|KQ087367:469444-472189|KQ087368:348761-349952|KQ087360:1535766-1537176|KQ087373:896451-898001|KQ087359:59415-61245|KQ087358:774516-776073|KQ087363:1649213-1649693|KQ087367:266419-267…	http://amigo.geneontology.org/cgi-bin/amigo/term_details?term=GO:0006139
cytosol	Gene Ontology	GO:0005829	18	1121	0.999951	1	KQ087363:272557-274522|KQ087367:547555-549291|KQ087376:132644-133020|KQ087368:347994-348672|KQ087363:1793895-1795149|KQ087375:1524875-1528764|KQ087373:896451-898001|KQ087375:702699-704464|KQ087358:2020243-2020733|KQ087359:2266552-2267534|KQ087362:1157172-1159141|KQ087375:597976-599821|KQ087370:183021-184094|KQ087362:1249785-1252401|KQ087369:435390-436842|KQ087368:22419-24214|KQ087363:575562-57679…	http://amigo.geneontology.org/cgi-bin/amigo/term_details?term=GO:0005829
nucleic acid metabolic process	Gene Ontology	GO:0090304	12	887	0.999968	1	KQ087358:2020243-2020733|KQ087374:229954-230815|KQ087358:1010971-1012453|KQ087373:1051779-1053812|KQ087363:358458-359253|KQ087359:59415-61245|KQ087359:2188715-2190753|KQ087368:348761-349952|KQ087370:28124-30599|KQ087367:469444-472189|KQ087363:1649213-1649693|KQ087367:266419-267265	http://amigo.geneontology.org/cgi-bin/amigo/term_details?term=GO:0090304
intracellular ribonucleoprotein complex	Gene Ontology	GO:0030529	1	310	0.999976	1	KQ087369:435390-436842	http://amigo.geneontology.org/cgi-bin/amigo/term_details?term=GO:0030529
ribonucleoprotein complex	Gene Ontology	GO:1990904	1	310	0.999976	1	KQ087369:435390-436842	http://amigo.geneontology.org/cgi-bin/amigo/term_details?term=GO:1990904
organelle lumen	Gene Ontology	GO:0043233	4	539	0.99999	1	KQ087373:518820-520652|KQ087376:132644-133020|KQ087368:22419-24214|KQ087360:2538058-2539986	http://amigo.geneontology.org/cgi-bin/amigo/term_details?term=GO:0043233
membrane-enclosed lumen	Gene Ontology	GO:0031974	4	539	0.99999	1	KQ087373:518820-520652|KQ087376:132644-133020|KQ087368:22419-24214|KQ087360:2538058-2539986	http://amigo.geneontology.org/cgi-bin/amigo/term_details?term=GO:0031974
intracellular organelle lumen	Gene Ontology	GO:0070013	4	539	0.99999	1	KQ087373:518820-520652|KQ087376:132644-133020|KQ087368:22419-24214|KQ087360:2538058-2539986	http://amigo.geneontology.org/cgi-bin/amigo/term_details?term=GO:0070013
cell cycle process	Gene Ontology	GO:0022402	1	344	0.999993	1	KQ087364:987665-989053	http://amigo.geneontology.org/cgi-bin/amigo/term_details?term=GO:0022402
macromolecular complex subunit organization	Gene Ontology	GO:0043933	1	350	0.999994	1	KQ087361:67268-68159	http://amigo.geneontology.org/cgi-bin/amigo/term_details?term=GO:0043933
cellular macromolecule biosynthetic process	Gene Ontology	GO:0034645	9	818	0.999994	1	KQ087374:229954-230815|KQ087358:1010971-1012453|KQ087373:1051779-1053812|KQ087363:358458-359253|KQ087359:59415-61245|KQ087359:2188715-2190753|KQ087368:348761-349952|KQ087370:28124-30599|KQ087367:266419-267265	http://amigo.geneontology.org/cgi-bin/amigo/term_details?term=GO:0034645
macromolecule biosynthetic process	Gene Ontology	GO:0009059	9	823	0.999995	1	KQ087374:229954-230815|KQ087358:1010971-1012453|KQ087373:1051779-1053812|KQ087363:358458-359253|KQ087359:59415-61245|KQ087359:2188715-2190753|KQ087368:348761-349952|KQ087370:28124-30599|KQ087367:266419-267265	http://amigo.geneontology.org/cgi-bin/amigo/term_details?term=GO:0009059
cell part	Gene Ontology	GO:0044464	70	3108	0.999996	1	KQ087367:547555-549291|KQ087359:370703-371359|KQ087375:1524875-1528764|KQ087358:1010971-1012453|KQ087370:183021-184094|KQ087365:2230410-2231601|KQ087362:1587636-1589145|KQ087363:1452640-1453806|KQ087359:2188715-2190753|KQ087364:854832-858221|KQ087362:799065-800463|KQ087364:1270973-1271768|KQ087360:2538058-2539986|KQ087370:28124-30599|KQ087367:1199056-1200381|KQ087365:557223-558575|KQ087368:347994…	http://amigo.geneontology.org/cgi-bin/amigo/term_details?term=GO:0044464
cell	Gene Ontology	GO:0005623	70	3108	0.999996	1	KQ087367:547555-549291|KQ087359:370703-371359|KQ087375:1524875-1528764|KQ087358:1010971-1012453|KQ087370:183021-184094|KQ087365:2230410-2231601|KQ087362:1587636-1589145|KQ087363:1452640-1453806|KQ087359:2188715-2190753|KQ087364:854832-858221|KQ087362:799065-800463|KQ087364:1270973-1271768|KQ087360:2538058-2539986|KQ087370:28124-30599|KQ087367:1199056-1200381|KQ087365:557223-558575|KQ087368:347994…	http://amigo.geneontology.org/cgi-bin/amigo/term_details?term=GO:0005623
gene expression	Gene Ontology	GO:0010467	10	886	0.999997	1	KQ087374:229954-230815|KQ087358:1010971-1012453|KQ087373:1051779-1053812|KQ087363:358458-359253|KQ087359:59415-61245|KQ087359:2188715-2190753|KQ087368:348761-349952|KQ087370:28124-30599|KQ087363:1649213-1649693|KQ087367:266419-267265	http://amigo.geneontology.org/cgi-bin/amigo/term_details?term=GO:0010467
cell cycle	Gene Ontology	GO:0007049	1	367	0.999997	1	KQ087364:987665-989053	http://amigo.geneontology.org/cgi-bin/amigo/term_details?term=GO:0007049
cellular protein metabolic process	Gene Ontology	GO:0044267	5	633	0.999997	1	KQ087375:1026593-1028945|KQ087367:433393-435062|KQ087376:132644-133020|KQ087359:370703-371359|KQ087368:347994-348672	http://amigo.geneontology.org/cgi-bin/amigo/term_details?term=GO:0044267
cellular component biogenesis	Gene Ontology	GO:0044085	2	464	0.999998	1	KQ087359:370703-371359|KQ087361:67268-68159	http://amigo.geneontology.org/cgi-bin/amigo/term_details?term=GO:0044085
intracellular	Gene Ontology	GO:0005622	65	2998	0.999998	1	KQ087367:547555-549291|KQ087359:370703-371359|KQ087375:1524875-1528764|KQ087358:1010971-1012453|KQ087370:183021-184094|KQ087365:2230410-2231601|KQ087362:1587636-1589145|KQ087363:1452640-1453806|KQ087359:2188715-2190753|KQ087364:854832-858221|KQ087362:799065-800463|KQ087364:1270973-1271768|KQ087360:2538058-2539986|KQ087370:28124-30599|KQ087367:1199056-1200381|KQ087365:557223-558575|KQ087368:347994…	http://amigo.geneontology.org/cgi-bin/amigo/term_details?term=GO:0005622
organelle organization	Gene Ontology	GO:0006996	3	596	1	1	KQ087376:132644-133020|KQ087359:370703-371359|KQ087361:67268-68159	http://amigo.geneontology.org/cgi-bin/amigo/term_details?term=GO:0006996
cellular macromolecule metabolic process	Gene Ontology	GO:0044260	18	1425	1	1	KQ087358:2020243-2020733|KQ087375:1026593-1028945|KQ087374:229954-230815|KQ087376:132644-133020|KQ087358:1010971-1012453|KQ087373:1051779-1053812|KQ087363:358458-359253|KQ087359:59415-61245|KQ087359:2188715-2190753|KQ087360:999535-1000354|KQ087367:433393-435062|KQ087359:370703-371359|KQ087368:348761-349952|KQ087370:28124-30599|KQ087367:469444-472189|KQ087363:1649213-1649693|KQ087368:347994-348672…	http://amigo.geneontology.org/cgi-bin/amigo/term_details?term=GO:0044260
cytoplasmic part	Gene Ontology	GO:0044444	33	2099	1	1	KQ087367:547555-549291|KQ087359:370703-371359|KQ087375:1524875-1528764|KQ087370:183021-184094|KQ087362:1587636-1589145|KQ087364:854832-858221|KQ087360:2538058-2539986|KQ087368:347994-348672|KQ087369:814467-815786|KQ087358:2020243-2020733|KQ087375:1006633-1007221|KQ087363:999702-1001317|KQ087362:1157172-1159141|KQ087373:980127-981877|KQ087361:67268-68159|KQ087373:518820-520652|KQ087375:23302-23890…	http://amigo.geneontology.org/cgi-bin/amigo/term_details?term=GO:0044444
intracellular non-membrane-bounded organelle	Gene Ontology	GO:0043232	2	640	1	1	KQ087369:435390-436842|KQ087375:1524875-1528764	http://amigo.geneontology.org/cgi-bin/amigo/term_details?term=GO:0043232
non-membrane-bounded organelle	Gene Ontology	GO:0043228	2	640	1	1	KQ087369:435390-436842|KQ087375:1524875-1528764	http://amigo.geneontology.org/cgi-bin/amigo/term_details?term=GO:0043228
nucleus	Gene Ontology	GO:0005634	20	1591	1	1	KQ087363:272557-274522|KQ087358:2020243-2020733|KQ087376:132644-133020|KQ087363:1793895-1795149|KQ087375:1524875-1528764|KQ087358:1010971-1012453|KQ087370:183021-184094|KQ087373:896451-898001|KQ087370:28124-30599|KQ087359:2188715-2190753|KQ087373:1051779-1053812|KQ087359:2266552-2267534|KQ087362:1157172-1159141|KQ087368:348761-349952|KQ087375:597976-599821|KQ087359:59415-61245|KQ087362:1249785-12…	http://amigo.geneontology.org/cgi-bin/amigo/term_details?term=GO:0005634
cytoplasm	Gene Ontology	GO:0005737	37	2298	1	1	KQ087367:547555-549291|KQ087359:370703-371359|KQ087375:1524875-1528764|KQ087370:183021-184094|KQ087362:1587636-1589145|KQ087364:854832-858221|KQ087362:799065-800463|KQ087360:2538058-2539986|KQ087368:347994-348672|KQ087369:814467-815786|KQ087358:2020243-2020733|KQ087375:1006633-1007221|KQ087363:999702-1001317|KQ087362:1157172-1159141|KQ087375:597976-599821|KQ087361:67268-68159|KQ087373:518820-5206…	http://amigo.geneontology.org/cgi-bin/amigo/term_details?term=GO:0005737
cellular component organization	Gene Ontology	GO:0016043	4	812	1	1	KQ087376:132644-133020|KQ087359:370703-371359|KQ087361:67268-68159|KQ087362:1747125-1748285	http://amigo.geneontology.org/cgi-bin/amigo/term_details?term=GO:0016043
intracellular membrane-bounded organelle	Gene Ontology	GO:0043231	39	2493	1	1	KQ087367:547555-549291|KQ087359:370703-371359|KQ087375:1524875-1528764|KQ087358:1010971-1012453|KQ087370:183021-184094|KQ087362:1587636-1589145|KQ087359:2188715-2190753|KQ087364:854832-858221|KQ087368:348761-349952|KQ087360:2538058-2539986|KQ087370:28124-30599|KQ087369:814467-815786|KQ087358:2020243-2020733|KQ087375:1006633-1007221|KQ087363:999702-1001317|KQ087362:1157172-1159141|KQ087373:980127-…	http://amigo.geneontology.org/cgi-bin/amigo/term_details?term=GO:0043231
membrane-bounded organelle	Gene Ontology	GO:0043227	39	2493	1	1	KQ087367:547555-549291|KQ087359:370703-371359|KQ087375:1524875-1528764|KQ087358:1010971-1012453|KQ087370:183021-184094|KQ087362:1587636-1589145|KQ087359:2188715-2190753|KQ087364:854832-858221|KQ087368:348761-349952|KQ087360:2538058-2539986|KQ087370:28124-30599|KQ087369:814467-815786|KQ087358:2020243-2020733|KQ087375:1006633-1007221|KQ087363:999702-1001317|KQ087362:1157172-1159141|KQ087373:980127-…	http://amigo.geneontology.org/cgi-bin/amigo/term_details?term=GO:0043227
cellular component organization or biogenesis	Gene Ontology	GO:0071840	4	916	1	1	KQ087376:132644-133020|KQ087359:370703-371359|KQ087361:67268-68159|KQ087362:1747125-1748285	http://amigo.geneontology.org/cgi-bin/amigo/term_details?term=GO:0071840
protein complex	Gene Ontology	GO:0043234	1	722	1	1	KQ087361:67268-68159	http://amigo.geneontology.org/cgi-bin/amigo/term_details?term=GO:0043234
organelle	Gene Ontology	GO:0043226	39	2606	1	1	KQ087367:547555-549291|KQ087359:370703-371359|KQ087375:1524875-1528764|KQ087358:1010971-1012453|KQ087370:183021-184094|KQ087362:1587636-1589145|KQ087359:2188715-2190753|KQ087364:854832-858221|KQ087368:348761-349952|KQ087360:2538058-2539986|KQ087370:28124-30599|KQ087369:814467-815786|KQ087358:2020243-2020733|KQ087375:1006633-1007221|KQ087363:999702-1001317|KQ087362:1157172-1159141|KQ087373:980127-…	http://amigo.geneontology.org/cgi-bin/amigo/term_details?term=GO:0043226
intracellular organelle	Gene Ontology	GO:0043229	39	2606	1	1	KQ087367:547555-549291|KQ087359:370703-371359|KQ087375:1524875-1528764|KQ087358:1010971-1012453|KQ087370:183021-184094|KQ087362:1587636-1589145|KQ087359:2188715-2190753|KQ087364:854832-858221|KQ087368:348761-349952|KQ087360:2538058-2539986|KQ087370:28124-30599|KQ087369:814467-815786|KQ087358:2020243-2020733|KQ087375:1006633-1007221|KQ087363:999702-1001317|KQ087362:1157172-1159141|KQ087373:980127-…	http://amigo.geneontology.org/cgi-bin/amigo/term_details?term=GO:0043229
intracellular organelle part	Gene Ontology	GO:0044446	7	1235	1	1	KQ087376:132644-133020|KQ087361:67268-68159|KQ087375:1524875-1528764|KQ087373:518820-520652|KQ087365:2085944-2087615|KQ087360:2538058-2539986|KQ087368:22419-24214	http://amigo.geneontology.org/cgi-bin/amigo/term_details?term=GO:0044446
organelle part	Gene Ontology	GO:0044422	7	1238	1	1	KQ087376:132644-133020|KQ087361:67268-68159|KQ087375:1524875-1528764|KQ087373:518820-520652|KQ087365:2085944-2087615|KQ087360:2538058-2539986|KQ087368:22419-24214	http://amigo.geneontology.org/cgi-bin/amigo/term_details?term=GO:0044422
intracellular part	Gene Ontology	GO:0044424	44	2901	1	1	KQ087367:547555-549291|KQ087359:370703-371359|KQ087375:1524875-1528764|KQ087358:1010971-1012453|KQ087370:183021-184094|KQ087362:1587636-1589145|KQ087359:2188715-2190753|KQ087364:854832-858221|KQ087362:799065-800463|KQ087368:348761-349952|KQ087360:2538058-2539986|KQ087370:28124-30599|KQ087368:347994-348672|KQ087369:814467-815786|KQ087358:2020243-2020733|KQ087375:1006633-1007221|KQ087363:999702-100…	http://amigo.geneontology.org/cgi-bin/amigo/term_details?term=GO:0044424
macromolecular complex	Gene Ontology	GO:0032991	2	1001	1	1	KQ087369:435390-436842|KQ087361:67268-68159	http://amigo.geneontology.org/cgi-bin/amigo/term_details?term=GO:0032991

## Sheet: cys_kegg_up
#Term	Database	ID	Input number	Background number	P-Value	Corrected P-Value	Input	Hyperlink
Glycolysis / Gluconeogenesis	KEGG PATHWAY	afm00010	7	50	0.00261867	0.101643	KQ087362:1157172-1159141|KQ087359:153798-155487|KQ087363:1452640-1453806|KQ087361:799400-800517|KQ087359:2266552-2267534|KQ087373:896451-898001|KQ087367:1199056-1200381	http://www.genome.jp/kegg-bin/show_pathway?afm00010/afm:AFUA_5G06240%09red/afm:AFUA_3G11070%09red/afm:AFUA_5G14800%09red/afm:AFUA_8G02560%09red/afm:AFUA_1G09750%09red/afm:AFUA_6G02230%09red/afm:AFUA_2G00720%09red
Pyruvate metabolism	KEGG PATHWAY	afm00620	6	40	0.00387052	0.13521	KQ087367:547555-549291|KQ087359:153798-155487|KQ087373:518820-520652|KQ087359:2266552-2267534|KQ087375:342824-344250|KQ087359:2263883-2266350	http://www.genome.jp/kegg-bin/show_pathway?afm00620/afm:AFUA_4G07050%09red/afm:AFUA_5G14800%09red/afm:AFUA_8G05580%09red/afm:AFUA_5G14790%09red/afm:AFUA_6G03540%09red/afm:AFUA_2G00720%09red
Propanoate metabolism	KEGG PATHWAY	afm00640	5	31	0.00627726	0.180228	KQ087359:2266552-2267534|KQ087365:2354054-2355609|KQ087363:9602-10755|KQ087359:110471-111555|KQ087360:1268336-1269852	http://www.genome.jp/kegg-bin/show_pathway?afm00640/afm:AFUA_2G13610%09red/afm:AFUA_4G00290%09red/afm:AFUA_5G14800%09red/afm:AFUA_2G00540%09red/afm:AFUA_5G00300%09red
Starch and sucrose metabolism	KEGG PATHWAY	afm00500	8	88	0.0141324	0.288898	KQ087367:276751-277801|KQ087365:2099302-2100451|KQ087375:1226173-1228405|KQ087371:205036-207990|KQ087369:804966-806718|KQ087373:896451-898001|KQ087375:1231454-1234621|KQ087367:218267-220072	http://www.genome.jp/kegg-bin/show_pathway?afm00500/afm:AFUA_7G06380%09red/afm:AFUA_4G10130%09red/afm:AFUA_6G02230%09red/afm:AFUA_4G10150%09red/afm:AFUA_3G03870%09red/afm:AFUA_8G06830%09red/afm:AFUA_1G16250%09red/afm:AFUA_8G07070%09red
Galactose metabolism	KEGG PATHWAY	afm00052	5	39	0.014592	0.288898	KQ087375:1231454-1234621|KQ087371:205036-207990|KQ087369:804966-806718|KQ087373:896451-898001|KQ087367:218267-220072	http://www.genome.jp/kegg-bin/show_pathway?afm00052/afm:AFUA_1G16250%09red/afm:AFUA_6G02230%09red/afm:AFUA_8G07070%09red/afm:AFUA_4G10150%09red/afm:AFUA_7G06380%09red
Carbon metabolism	KEGG PATHWAY	afm01200	9	118	0.0250993	0.36033	KQ087373:518820-520652|KQ087359:31525-33642|KQ087373:434260-436619|KQ087373:896451-898001|KQ087365:2354054-2355609|KQ087358:774516-776073|KQ087359:2263883-2266350|KQ087367:1199056-1200381|KQ087368:22419-24214	http://www.genome.jp/kegg-bin/show_pathway?afm01200/afm:AFUA_4G00290%09red/afm:AFUA_6G03890%09red/afm:AFUA_8G02560%09red/afm:AFUA_2G00200%09red/afm:AFUA_6G03540%09red/afm:AFUA_5G14790%09red/afm:AFUA_6G02230%09red/afm:AFUA_4G13510%09red/afm:AFUA_6G08730%09red
Glyoxylate and dicarboxylate metabolism	KEGG PATHWAY	afm00630	4	35	0.0391528	0.456978	KQ087373:434260-436619|KQ087373:518820-520652|KQ087368:22419-24214|KQ087359:31525-33642	http://www.genome.jp/kegg-bin/show_pathway?afm00630/afm:AFUA_4G13510%09red/afm:AFUA_6G03890%09red/afm:AFUA_6G03540%09red/afm:AFUA_2G00200%09red
Pentose and glucuronate interconversions	KEGG PATHWAY	afm00040	4	36	0.0424098	0.456978	KQ087361:799400-800517|KQ087359:153798-155487|KQ087369:810603-811408|KQ087367:455950-456781	http://www.genome.jp/kegg-bin/show_pathway?afm00040/afm:AFUA_1G09750%09red/afm:AFUA_8G05910%09red/afm:AFUA_2G00720%09red/afm:AFUA_7G06400%09red
Tryptophan metabolism	KEGG PATHWAY	afm00380	4	36	0.0424098	0.456978	KQ087373:434260-436619|KQ087359:153798-155487|KQ087360:171314-172508|KQ087359:31525-33642	http://www.genome.jp/kegg-bin/show_pathway?afm00380/afm:AFUA_2G17440%09red/afm:AFUA_6G03890%09red/afm:AFUA_2G00720%09red/afm:AFUA_2G00200%09red
Pentose phosphate pathway	KEGG PATHWAY	afm00030	3	26	0.069839	0.604887	KQ087358:774516-776073|KQ087362:1249785-1252401|KQ087364:76654-79093	http://www.genome.jp/kegg-bin/show_pathway?afm00030/afm:AFUA_3G10760%09red/afm:AFUA_6G08730%09red/afm:AFUA_3G00370%09red
Taurine and hypotaurine metabolism	KEGG PATHWAY	afm00430	2	12	0.0766209	0.641207	KQ087367:423921-426010|KQ087359:2191806-2192574	http://www.genome.jp/kegg-bin/show_pathway?afm00430/afm:AFUA_5G14410%09red/afm:AFUA_8G06020%09red
Biosynthesis of antibiotics	KEGG PATHWAY	afm01130	14	274	0.0976577	0.731037	KQ087358:1680543-1681945|KQ087362:1157172-1159141|KQ087359:225790-227494|KQ087359:153798-155487|KQ087363:1452640-1453806|KQ087359:31525-33642|KQ087361:799400-800517|KQ087373:434260-436619|KQ087359:2266552-2267534|KQ087373:896451-898001|KQ087365:2354054-2355609|KQ087358:774516-776073|KQ087367:1199056-1200381|KQ087369:836595-837678	http://www.genome.jp/kegg-bin/show_pathway?afm01130/afm:AFUA_5G06240%09red/afm:AFUA_6G03890%09red/afm:AFUA_2G01010%09red/afm:AFUA_4G00290%09red/afm:AFUA_5G14800%09red/afm:AFUA_8G02560%09red/afm:AFUA_2G00200%09red/afm:AFUA_1G09750%09red/afm:AFUA_7G06540%09red/afm:AFUA_6G12110%09red/afm:AFUA_3G11070%09red/afm:AFUA_6G02230%09red/afm:AFUA_6G08730%09red/afm:AFUA_2G00720%09red
Biosynthesis of secondary metabolites	KEGG PATHWAY	afm01110	17	364	0.130552	0.87561	KQ087358:1680543-1681945|KQ087362:1157172-1159141|KQ087359:153798-155487|KQ087373:518820-520652|KQ087367:423921-426010|KQ087363:1452640-1453806|KQ087361:799400-800517|KQ087373:434260-436619|KQ087359:2266552-2267534|KQ087359:31525-33642|KQ087373:896451-898001|KQ087365:2354054-2355609|KQ087358:774516-776073|KQ087367:1199056-1200381|KQ087369:836595-837678|KQ087368:22419-24214|KQ087374:210259-212568	http://www.genome.jp/kegg-bin/show_pathway?afm01110/afm:AFUA_5G06240%09red/afm:AFUA_6G03890%09red/afm:AFUA_4G00290%09red/afm:AFUA_5G14800%09red/afm:AFUA_1G17430%09red/afm:AFUA_8G02560%09red/afm:AFUA_2G00200%09red/afm:AFUA_1G09750%09red/afm:AFUA_3G11070%09red/afm:AFUA_7G06540%09red/afm:AFUA_6G12110%09red/afm:AFUA_6G03540%09red/afm:AFUA_6G02230%09red/afm:AFUA_4G13510%09red/afm:AFUA_6G08730%09red/af…
Tyrosine metabolism	KEGG PATHWAY	afm00350	3	41	0.178018	0.87561	KQ087375:702699-704464|KQ087363:1452640-1453806|KQ087374:210259-212568	http://www.genome.jp/kegg-bin/show_pathway?afm00350/afm:AFUA_5G06240%09red/afm:AFUA_1G17430%09red/afm:AFUA_4G08170%09red
Linoleic acid metabolism	KEGG PATHWAY	afm00591	1	5	0.18308	0.87561	KQ087365:2385862-2391569	http://www.genome.jp/kegg-bin/show_pathway?afm00591/afm:AFUA_4G00180%09red
Lysine degradation	KEGG PATHWAY	afm00310	2	22	0.18808	0.87561	KQ087359:153798-155487|KQ087375:702699-704464	http://www.genome.jp/kegg-bin/show_pathway?afm00310/afm:AFUA_2G00720%09red/afm:AFUA_4G08170%09red
Butanoate metabolism	KEGG PATHWAY	afm00650	2	23	0.200228	0.87561	KQ087367:423921-426010|KQ087375:702699-704464	http://www.genome.jp/kegg-bin/show_pathway?afm00650/afm:AFUA_4G08170%09red/afm:AFUA_8G06020%09red
Ascorbate and aldarate metabolism	KEGG PATHWAY	afm00053	1	6	0.210163	0.87561	KQ087359:153798-155487	http://www.genome.jp/kegg-bin/show_pathway?afm00053/afm:AFUA_2G00720%09red
Thiamine metabolism	KEGG PATHWAY	afm00730	1	6	0.210163	0.87561	KQ087363:575562-576797	http://www.genome.jp/kegg-bin/show_pathway?afm00730/afm:AFUA_5G02470%09red
beta-Alanine metabolism	KEGG PATHWAY	afm00410	2	25	0.22477	0.87561	KQ087367:423921-426010|KQ087359:153798-155487	http://www.genome.jp/kegg-bin/show_pathway?afm00410/afm:AFUA_2G00720%09red/afm:AFUA_8G06020%09red
Fatty acid degradation	KEGG PATHWAY	afm00071	2	25	0.22477	0.87561	KQ087359:153798-155487|KQ087363:1452640-1453806	http://www.genome.jp/kegg-bin/show_pathway?afm00071/afm:AFUA_5G06240%09red/afm:AFUA_2G00720%09red
Glutathione metabolism	KEGG PATHWAY	afm00480	2	29	0.274344	0.87561	KQ087358:774516-776073|KQ087368:347994-348672	http://www.genome.jp/kegg-bin/show_pathway?afm00480/afm:AFUA_4G14530%09red/afm:AFUA_6G08730%09red
ABC transporters	KEGG PATHWAY	afm02010	1	9	0.286158	0.87561	KQ087373:541958-546058	http://www.genome.jp/kegg-bin/show_pathway?afm02010/afm:AFUA_6G03470%09red
Alanine, aspartate and glutamate metabolism	KEGG PATHWAY	afm00250	2	33	0.323777	0.889531	KQ087367:423921-426010|KQ087375:702699-704464	http://www.genome.jp/kegg-bin/show_pathway?afm00250/afm:AFUA_4G08170%09red/afm:AFUA_8G06020%09red
Riboflavin metabolism	KEGG PATHWAY	afm00740	1	11	0.332725	0.889531	KQ087374:210259-212568	http://www.genome.jp/kegg-bin/show_pathway?afm00740/afm:AFUA_1G17430%09red
Glycerolipid metabolism	KEGG PATHWAY	afm00561	2	39	0.396072	0.904375	KQ087361:799400-800517|KQ087359:153798-155487	http://www.genome.jp/kegg-bin/show_pathway?afm00561/afm:AFUA_1G09750%09red/afm:AFUA_2G00720%09red
Histidine metabolism	KEGG PATHWAY	afm00340	1	17	0.455025	0.946164	KQ087359:153798-155487	http://www.genome.jp/kegg-bin/show_pathway?afm00340/afm:AFUA_2G00720%09red
Nicotinate and nicotinamide metabolism	KEGG PATHWAY	afm00760	1	20	0.507516	1	KQ087375:702699-704464	http://www.genome.jp/kegg-bin/show_pathway?afm00760/afm:AFUA_4G08170%09red
Nitrogen metabolism	KEGG PATHWAY	afm00910	1	20	0.507516	1	KQ087359:1411400-1413175	http://www.genome.jp/kegg-bin/show_pathway?afm00910/afm:AFUA_1G12850%09red
Glycerophospholipid metabolism	KEGG PATHWAY	afm00564	2	49	0.507727	1	KQ087363:272557-274522|KQ087358:1712792-1714043	http://www.genome.jp/kegg-bin/show_pathway?afm00564/afm:AFUA_6G12240%09red/afm:AFUA_5G01340%09red
Cysteine and methionine metabolism	KEGG PATHWAY	afm00270	2	49	0.507727	1	KQ087359:2266552-2267534|KQ087359:2191806-2192574	http://www.genome.jp/kegg-bin/show_pathway?afm00270/afm:AFUA_5G14800%09red/afm:AFUA_5G14410%09red
Metabolic pathways	KEGG PATHWAY	afm01100	32	937	0.536176	1	KQ087363:1452640-1453806|KQ087367:423921-426010|KQ087359:2263883-2266350|KQ087367:1199056-1200381|KQ087374:210259-212568|KQ087362:1157172-1159141|KQ087365:2099302-2100451|KQ087373:518820-520652|KQ087359:2233187-2233945|KQ087361:799400-800517|KQ087367:276751-277801|KQ087365:2354054-2355609|KQ087358:774516-776073|KQ087363:575562-576797|KQ087369:804966-806718|KQ087359:225790-227494|KQ087362:1249785-…	http://www.genome.jp/kegg-bin/show_pathway?afm01100/afm:AFUA_3G08070%09red/afm:AFUA_5G14800%09red/afm:AFUA_8G02560%09red/afm:AFUA_1G16250%09red/afm:AFUA_7G06540%09red/afm:AFUA_5G14640%09red/afm:AFUA_1G17430%09red/afm:AFUA_8G06020%09red/afm:AFUA_7G06380%09red/afm:AFUA_5G06240%09red/afm:AFUA_2G01010%09red/afm:AFUA_7G00270%09red/afm:AFUA_5G14410%09red/afm:AFUA_5G14790%09red/afm:AFUA_4G13510%09red/af…
Peroxisome	KEGG PATHWAY	afm04146	2	55	0.567982	1	KQ087373:434260-436619|KQ087359:31525-33642	http://www.genome.jp/kegg-bin/show_pathway?afm04146/afm:AFUA_6G03890%09red/afm:AFUA_2G00200%09red
Inositol phosphate metabolism	KEGG PATHWAY	afm00562	1	26	0.597855	1	KQ087359:225790-227494	http://www.genome.jp/kegg-bin/show_pathway?afm00562/afm:AFUA_2G01010%09red
Glycine, serine and threonine metabolism	KEGG PATHWAY	afm00260	2	59	0.605104	1	KQ087362:1972584-1974621|KQ087369:836595-837678	http://www.genome.jp/kegg-bin/show_pathway?afm00260/afm:AFUA_3G08070%09red/afm:AFUA_7G06540%09red
Methane metabolism	KEGG PATHWAY	afm00680	1	27	0.611216	1	KQ087359:2263883-2266350	http://www.genome.jp/kegg-bin/show_pathway?afm00680/afm:AFUA_5G14790%09red
MAPK signaling pathway - yeast	KEGG PATHWAY	afm04011	2	61	0.622741	1	KQ087373:434260-436619|KQ087359:31525-33642	http://www.genome.jp/kegg-bin/show_pathway?afm04011/afm:AFUA_6G03890%09red/afm:AFUA_2G00200%09red
Citrate cycle (TCA cycle)	KEGG PATHWAY	afm00020	1	29	0.636623	1	KQ087365:2354054-2355609	http://www.genome.jp/kegg-bin/show_pathway?afm00020/afm:AFUA_4G00290%09red
Fructose and mannose metabolism	KEGG PATHWAY	afm00051	1	37	0.722738	1	KQ087373:896451-898001	http://www.genome.jp/kegg-bin/show_pathway?afm00051/afm:AFUA_6G02230%09red
Valine, leucine and isoleucine degradation	KEGG PATHWAY	afm00280	1	38	0.731959	1	KQ087359:153798-155487	http://www.genome.jp/kegg-bin/show_pathway?afm00280/afm:AFUA_2G00720%09red
Arginine and proline metabolism	KEGG PATHWAY	afm00330	1	39	0.740875	1	KQ087359:153798-155487	http://www.genome.jp/kegg-bin/show_pathway?afm00330/afm:AFUA_2G00720%09red
Amino sugar and nucleotide sugar metabolism	KEGG PATHWAY	afm00520	1	77	0.928532	1	KQ087373:896451-898001	http://www.genome.jp/kegg-bin/show_pathway?afm00520/afm:AFUA_6G02230%09red
Biosynthesis of amino acids	KEGG PATHWAY	afm01230	2	131	0.938287	1	KQ087367:1199056-1200381|KQ087369:836595-837678	http://www.genome.jp/kegg-bin/show_pathway?afm01230/afm:AFUA_7G06540%09red/afm:AFUA_8G02560%09red

## Sheet: cys_go_down
#Term	Database	ID	Input number	Background number	P-Value	Corrected P-Value	Input	Hyperlink
sulfate assimilation	Gene Ontology	GO:0000103	5	8	9.30866e-06	0.00293073	KQ087358:829077-832215|KQ087366:601329-603986|KQ087361:497876-498573|KQ087362:2481880-2484141|KQ087362:2478582-2479567	http://amigo.geneontology.org/cgi-bin/amigo/term_details?term=GO:0000103
indole alkaloid biosynthetic process	Gene Ontology	GO:0035835	6	16	1.09458e-05	0.00293073	KQ087358:1660322-1672264|KQ087367:1849073-1850422|KQ087358:1651081-1654414|KQ087360:34988-36578|KQ087358:2205989-2207522|KQ087360:37254-39213	http://amigo.geneontology.org/cgi-bin/amigo/term_details?term=GO:0035835
indole alkaloid metabolic process	Gene Ontology	GO:0035834	6	16	1.09458e-05	0.00293073	KQ087358:1660322-1672264|KQ087367:1849073-1850422|KQ087358:1651081-1654414|KQ087360:34988-36578|KQ087358:2205989-2207522|KQ087360:37254-39213	http://amigo.geneontology.org/cgi-bin/amigo/term_details?term=GO:0035834
alkaloid biosynthetic process	Gene Ontology	GO:0009821	6	20	3.11055e-05	0.0066628	KQ087358:1660322-1672264|KQ087367:1849073-1850422|KQ087358:1651081-1654414|KQ087360:34988-36578|KQ087358:2205989-2207522|KQ087360:37254-39213	http://amigo.geneontology.org/cgi-bin/amigo/term_details?term=GO:0009821
alkaloid metabolic process	Gene Ontology	GO:0009820	6	24	7.38919e-05	0.0131897	KQ087358:1660322-1672264|KQ087367:1849073-1850422|KQ087358:1651081-1654414|KQ087360:34988-36578|KQ087358:2205989-2207522|KQ087360:37254-39213	http://amigo.geneontology.org/cgi-bin/amigo/term_details?term=GO:0009820
hydrolase activity, hydrolyzing O-glycosyl compounds	Gene Ontology	GO:0004553	14	168	0.000150592	0.0175993	KQ087367:356152-357382|KQ087364:100407-102613|KQ087363:1007886-1012571|KQ087367:1525784-1528662|KQ087373:591830-593646|KQ087365:449005-449578|KQ087376:56623-57856|KQ087358:1526267-1527664|KQ087363:118552-120324|KQ087374:241916-243284|KQ087364:910390-912706|KQ087358:2139490-2144714|KQ087365:447988-448935|KQ087362:2998114-2999250	http://amigo.geneontology.org/cgi-bin/amigo/term_details?term=GO:0004553
cellulose binding	Gene Ontology	GO:0030248	5	17	0.000158959	0.0175993	KQ087367:356152-357382|KQ087358:1526267-1527664|KQ087364:100407-102613|KQ087373:591830-593646|KQ087362:2998114-2999250	http://amigo.geneontology.org/cgi-bin/amigo/term_details?term=GO:0030248
terpenoid indole alkaloid metabolic process	Gene Ontology	GO:0046447	4	9	0.000211576	0.0175993	KQ087360:37254-39213|KQ087358:1651081-1654414|KQ087360:34988-36578|KQ087358:2205989-2207522	http://amigo.geneontology.org/cgi-bin/amigo/term_details?term=GO:0046447
ergot alkaloid biosynthetic process	Gene Ontology	GO:0035837	4	9	0.000211576	0.0175993	KQ087360:37254-39213|KQ087358:1651081-1654414|KQ087360:34988-36578|KQ087358:2205989-2207522	http://amigo.geneontology.org/cgi-bin/amigo/term_details?term=GO:0035837
ergot alkaloid metabolic process	Gene Ontology	GO:0035836	4	9	0.000211576	0.0175993	KQ087360:37254-39213|KQ087358:1651081-1654414|KQ087360:34988-36578|KQ087358:2205989-2207522	http://amigo.geneontology.org/cgi-bin/amigo/term_details?term=GO:0035836
terpenoid indole alkaloid biosynthetic process	Gene Ontology	GO:0009709	4	9	0.000211576	0.0175993	KQ087360:37254-39213|KQ087358:1651081-1654414|KQ087360:34988-36578|KQ087358:2205989-2207522	http://amigo.geneontology.org/cgi-bin/amigo/term_details?term=GO:0009709
hydrolase activity, acting on glycosyl bonds	Gene Ontology	GO:0016798	14	175	0.000223744	0.0175993	KQ087367:356152-357382|KQ087364:100407-102613|KQ087363:1007886-1012571|KQ087367:1525784-1528662|KQ087373:591830-593646|KQ087365:449005-449578|KQ087376:56623-57856|KQ087358:1526267-1527664|KQ087363:118552-120324|KQ087374:241916-243284|KQ087364:910390-912706|KQ087358:2139490-2144714|KQ087365:447988-448935|KQ087362:2998114-2999250	http://amigo.geneontology.org/cgi-bin/amigo/term_details?term=GO:0016798
extracellular region	Gene Ontology	GO:0005576	16	221	0.000235356	0.0175993	KQ087367:356152-357382|KQ087358:1775025-1776704|KQ087364:100407-102613|KQ087373:591830-593646|KQ087370:266103-267749|KQ087375:490863-493383|KQ087365:449005-449578|KQ087364:910390-912706|KQ087376:56623-57856|KQ087363:889145-890432|KQ087373:131465-132914|KQ087358:1526267-1527664|KQ087364:634810-635620|KQ087360:1556239-1556698|KQ087365:447988-448935|KQ087362:2998114-2999250	http://amigo.geneontology.org/cgi-bin/amigo/term_details?term=GO:0005576
methionine biosynthetic process	Gene Ontology	GO:0009086	5	19	0.000246489	0.0175993	KQ087362:2478582-2479567|KQ087375:490863-493383|KQ087361:497876-498573|KQ087363:1088182-1089795|KQ087363:2161676-2163275	http://amigo.geneontology.org/cgi-bin/amigo/term_details?term=GO:0009086
primary alcohol metabolic process	Gene Ontology	GO:0034308	5	20	0.000302006	0.018765	KQ087374:247101-249213|KQ087360:37254-39213|KQ087360:34988-36578|KQ087358:2205989-2207522|KQ087370:266103-267749	http://amigo.geneontology.org/cgi-bin/amigo/term_details?term=GO:0034308
methionine metabolic process	Gene Ontology	GO:0006555	5	20	0.000302006	0.018765	KQ087362:2478582-2479567|KQ087375:490863-493383|KQ087361:497876-498573|KQ087363:1088182-1089795|KQ087363:2161676-2163275	http://amigo.geneontology.org/cgi-bin/amigo/term_details?term=GO:0006555
secondary metabolic process	Gene Ontology	GO:0019748	15	204	0.000315378	0.018765	KQ087358:2188679-2196071|KQ087362:429370-433224|KQ087358:1651081-1654414|KQ087358:1660322-1672264|KQ087365:2372967-2378471|KQ087365:2369227-2370352|KQ087362:2915437-2921767|KQ087367:1849073-1850422|KQ087362:622829-624191|KQ087364:735306-738657|KQ087360:34988-36578|KQ087358:2205989-2207522|KQ087366:1736570-1737723|KQ087360:37254-39213|KQ087362:862662-866724	http://amigo.geneontology.org/cgi-bin/amigo/term_details?term=GO:0019748
pattern binding	Gene Ontology	GO:0001871	5	21	0.000366506	0.0196264	KQ087367:356152-357382|KQ087358:1526267-1527664|KQ087364:100407-102613|KQ087373:591830-593646|KQ087362:2998114-2999250	http://amigo.geneontology.org/cgi-bin/amigo/term_details?term=GO:0001871
polysaccharide binding	Gene Ontology	GO:0030247	5	21	0.000366506	0.0196264	KQ087367:356152-357382|KQ087358:1526267-1527664|KQ087364:100407-102613|KQ087373:591830-593646|KQ087362:2998114-2999250	http://amigo.geneontology.org/cgi-bin/amigo/term_details?term=GO:0030247
cell wall macromolecule metabolic process	Gene Ontology	GO:0044036	8	66	0.000433573	0.020798	KQ087367:356152-357382|KQ087363:1007886-1012571|KQ087367:1525784-1528662|KQ087367:532772-534988|KQ087376:56623-57856|KQ087358:1526267-1527664|KQ087364:910390-912706|KQ087358:2139490-2144714	http://amigo.geneontology.org/cgi-bin/amigo/term_details?term=GO:0044036
aspartate family amino acid metabolic process	Gene Ontology	GO:0009066	6	35	0.000446642	0.020798	KQ087370:266103-267749|KQ087361:497876-498573|KQ087363:2161676-2163275|KQ087375:490863-493383|KQ087363:1088182-1089795|KQ087362:2478582-2479567	http://amigo.geneontology.org/cgi-bin/amigo/term_details?term=GO:0009066
phosphopantetheine binding	Gene Ontology	GO:0031177	6	35	0.000446642	0.020798	KQ087358:2188679-2196071|KQ087362:429370-433224|KQ087358:1651081-1654414|KQ087358:1660322-1672264|KQ087365:2372967-2378471|KQ087364:735306-738657	http://amigo.geneontology.org/cgi-bin/amigo/term_details?term=GO:0031177
single-organism metabolic process	Gene Ontology	GO:0044710	55	1396	0.000491142	0.0219172	KQ087360:1899458-1907109|KQ087367:1671961-1673346|KQ087360:2192566-2193797|KQ087370:266103-267749|KQ087367:532772-534988|KQ087362:622829-624191|KQ087365:1642849-1644666|KQ087361:497876-498573|KQ087363:3265873-3267451|KQ087360:2792129-2797401|KQ087359:427923-429827|KQ087362:429370-433224|KQ087358:1286557-1288080|KQ087362:2924274-2929987|KQ087363:2161676-2163275|KQ087365:621086-622320|KQ087373:2007…	http://amigo.geneontology.org/cgi-bin/amigo/term_details?term=GO:0044710
hemicellulose metabolic process	Gene Ontology	GO:0010410	5	23	0.000526126	0.0225392	KQ087367:356152-357382|KQ087358:1526267-1527664|KQ087364:910390-912706|KQ087367:1525784-1528662|KQ087376:56623-57856	http://amigo.geneontology.org/cgi-bin/amigo/term_details?term=GO:0010410
small molecule biosynthetic process	Gene Ontology	GO:0044283	18	292	0.000611257	0.0251791	KQ087370:266103-267749|KQ087369:690204-691637|KQ087363:1088182-1089795|KQ087365:2369227-2370352|KQ087374:247101-249213|KQ087360:2567613-2574708|KQ087365:2372967-2378471|KQ087375:490863-493383|KQ087362:2915437-2921767|KQ087367:1849073-1850422|KQ087360:37254-39213|KQ087360:34988-36578|KQ087358:2205989-2207522|KQ087362:2478582-2479567|KQ087362:862662-866724|KQ087362:2924274-2929987|KQ087363:2161676-…	http://amigo.geneontology.org/cgi-bin/amigo/term_details?term=GO:0044283
chanoclavine-I biosynthetic process	Gene Ontology	GO:1900566	3	5	0.00074377	0.0271541	KQ087360:37254-39213|KQ087360:34988-36578|KQ087358:2205989-2207522	http://amigo.geneontology.org/cgi-bin/amigo/term_details?term=GO:1900566
chanoclavine-I metabolic process	Gene Ontology	GO:1900564	3	5	0.00074377	0.0271541	KQ087360:37254-39213|KQ087360:34988-36578|KQ087358:2205989-2207522	http://amigo.geneontology.org/cgi-bin/amigo/term_details?term=GO:1900564
modified amino acid binding	Gene Ontology	GO:0072341	6	39	0.000745607	0.0271541	KQ087358:2188679-2196071|KQ087362:429370-433224|KQ087358:1651081-1654414|KQ087358:1660322-1672264|KQ087365:2372967-2378471|KQ087364:735306-738657	http://amigo.geneontology.org/cgi-bin/amigo/term_details?term=GO:0072341
amide binding	Gene Ontology	GO:0033218	7	55	0.000760619	0.0271541	KQ087358:2188679-2196071|KQ087362:1196774-1198078|KQ087362:429370-433224|KQ087358:1651081-1654414|KQ087358:1660322-1672264|KQ087365:2372967-2378471|KQ087364:735306-738657	http://amigo.geneontology.org/cgi-bin/amigo/term_details?term=GO:0033218
carboxylic acid biosynthetic process	Gene Ontology	GO:0046394	10	114	0.00091977	0.0317766	KQ087370:266103-267749|KQ087369:690204-691637|KQ087363:2161676-2163275|KQ087362:2915437-2921767|KQ087375:490863-493383|KQ087360:2567613-2574708|KQ087361:497876-498573|KQ087363:1088182-1089795|KQ087362:862662-866724|KQ087362:2478582-2479567	http://amigo.geneontology.org/cgi-bin/amigo/term_details?term=GO:0046394
aspartate family amino acid biosynthetic process	Gene Ontology	GO:0009067	5	27	0.000995331	0.033151	KQ087362:2478582-2479567|KQ087375:490863-493383|KQ087361:497876-498573|KQ087363:1088182-1089795|KQ087363:2161676-2163275	http://amigo.geneontology.org/cgi-bin/amigo/term_details?term=GO:0009067
primary alcohol biosynthetic process	Gene Ontology	GO:0034309	4	15	0.00102146	0.033151	KQ087374:247101-249213|KQ087360:37254-39213|KQ087360:34988-36578|KQ087358:2205989-2207522	http://amigo.geneontology.org/cgi-bin/amigo/term_details?term=GO:0034309
alpha-glucan metabolic process	Gene Ontology	GO:0030978	3	6	0.00109551	0.0339262	KQ087360:1899458-1907109|KQ087365:449005-449578|KQ087365:447988-448935	http://amigo.geneontology.org/cgi-bin/amigo/term_details?term=GO:0030978
glucan metabolic process	Gene Ontology	GO:0044042	7	59	0.0011087	0.0339262	KQ087360:1899458-1907109|KQ087367:1525784-1528662|KQ087365:449005-449578|KQ087367:532772-534988|KQ087358:1526267-1527664|KQ087365:447988-448935|KQ087362:2998114-2999250	http://amigo.geneontology.org/cgi-bin/amigo/term_details?term=GO:0044042
organic acid biosynthetic process	Gene Ontology	GO:0016053	13	186	0.00121881	0.0355686	KQ087370:266103-267749|KQ087369:690204-691637|KQ087365:2369227-2370352|KQ087360:2567613-2574708|KQ087365:2372967-2378471|KQ087375:490863-493383|KQ087362:2915437-2921767|KQ087361:497876-498573|KQ087363:1088182-1089795|KQ087362:862662-866724|KQ087362:2924274-2929987|KQ087363:2161676-2163275|KQ087362:2478582-2479567	http://amigo.geneontology.org/cgi-bin/amigo/term_details?term=GO:0016053
organic acid metabolic process	Gene Ontology	GO:0006082	21	392	0.00122879	0.0355686	KQ087370:266103-267749|KQ087369:690204-691637|KQ087363:1088182-1089795|KQ087362:2478582-2479567|KQ087365:2369227-2370352|KQ087360:2567613-2574708|KQ087365:2372967-2378471|KQ087375:490863-493383|KQ087362:2915437-2921767|KQ087367:1886428-1889941|KQ087365:1642849-1644666|KQ087367:7114-8303|KQ087361:497876-498573|KQ087373:131465-132914|KQ087360:2667102-2669282|KQ087362:862662-866724|KQ087358:1286557-…	http://amigo.geneontology.org/cgi-bin/amigo/term_details?term=GO:0006082
secondary metabolite biosynthetic process	Gene Ontology	GO:0044550	12	164	0.00129534	0.036508	KQ087365:2369227-2370352|KQ087358:1660322-1672264|KQ087365:2372967-2378471|KQ087362:2915437-2921767|KQ087367:1849073-1850422|KQ087362:622829-624191|KQ087358:1651081-1654414|KQ087360:34988-36578|KQ087358:2205989-2207522|KQ087366:1736570-1737723|KQ087360:37254-39213|KQ087362:862662-866724	http://amigo.geneontology.org/cgi-bin/amigo/term_details?term=GO:0044550
cysteine biosynthetic process	Gene Ontology	GO:0019344	3	7	0.00153679	0.0420503	KQ087362:2478582-2479567|KQ087363:1088182-1089795|KQ087363:2161676-2163275	http://amigo.geneontology.org/cgi-bin/amigo/term_details?term=GO:0019344
polysaccharide metabolic process	Gene Ontology	GO:0005976	10	123	0.00157051	0.0420503	KQ087367:356152-357382|KQ087360:1899458-1907109|KQ087367:1525784-1528662|KQ087365:449005-449578|KQ087367:532772-534988|KQ087358:1526267-1527664|KQ087364:910390-912706|KQ087376:56623-57856|KQ087365:447988-448935|KQ087362:2998114-2999250	http://amigo.geneontology.org/cgi-bin/amigo/term_details?term=GO:0005976
vitamin binding	Gene Ontology	GO:0019842	6	47	0.00178552	0.0455309	KQ087358:2188679-2196071|KQ087362:429370-433224|KQ087358:1651081-1654414|KQ087358:1660322-1672264|KQ087365:2372967-2378471|KQ087364:735306-738657	http://amigo.geneontology.org/cgi-bin/amigo/term_details?term=GO:0019842
cell wall polysaccharide metabolic process	Gene Ontology	GO:0010383	6	47	0.00178552	0.0455309	KQ087367:356152-357382|KQ087367:1525784-1528662|KQ087367:532772-534988|KQ087376:56623-57856|KQ087358:1526267-1527664|KQ087364:910390-912706	http://amigo.geneontology.org/cgi-bin/amigo/term_details?term=GO:0010383
polysaccharide catabolic process	Gene Ontology	GO:0000272	7	66	0.00200702	0.0499887	KQ087367:356152-357382|KQ087376:56623-57856|KQ087365:449005-449578|KQ087358:1526267-1527664|KQ087364:910390-912706|KQ087365:447988-448935|KQ087362:2998114-2999250	http://amigo.geneontology.org/cgi-bin/amigo/term_details?term=GO:0000272
single-organism biosynthetic process	Gene Ontology	GO:0044711	27	584	0.0020725	0.0504466	KQ087360:1899458-1907109|KQ087361:497876-498573|KQ087370:266103-267749|KQ087367:532772-534988|KQ087362:622829-624191|KQ087358:1651081-1654414|KQ087362:2924274-2929987|KQ087363:2161676-2163275|KQ087373:200757-201957|KQ087360:37254-39213|KQ087375:490863-493383|KQ087360:34988-36578|KQ087363:1088182-1089795|KQ087362:1491668-1493040|KQ087365:2369227-2370352|KQ087358:1660322-1672264|KQ087360:2567613-25…	http://amigo.geneontology.org/cgi-bin/amigo/term_details?term=GO:0044711
cellular glucan metabolic process	Gene Ontology	GO:0006073	6	49	0.00216487	0.0515238	KQ087360:1899458-1907109|KQ087367:1525784-1528662|KQ087365:449005-449578|KQ087367:532772-534988|KQ087358:1526267-1527664|KQ087365:447988-448935	http://amigo.geneontology.org/cgi-bin/amigo/term_details?term=GO:0006073
cell wall organization or biogenesis	Gene Ontology	GO:0071554	11	153	0.00232571	0.0541485	KQ087367:356152-357382|KQ087358:1775025-1776704|KQ087360:1899458-1907109|KQ087363:1007886-1012571|KQ087367:1525784-1528662|KQ087374:264300-264824|KQ087367:532772-534988|KQ087376:56623-57856|KQ087358:1526267-1527664|KQ087364:910390-912706|KQ087358:2139490-2144714	http://amigo.geneontology.org/cgi-bin/amigo/term_details?term=GO:0071554
cysteine metabolic process	Gene Ontology	GO:0006534	3	9	0.00271691	0.0619108	KQ087362:2478582-2479567|KQ087363:1088182-1089795|KQ087363:2161676-2163275	http://amigo.geneontology.org/cgi-bin/amigo/term_details?term=GO:0006534
chitin binding	Gene Ontology	GO:0008061	3	10	0.00346851	0.0752081	KQ087363:1007886-1012571|KQ087373:591830-593646|KQ087358:2139490-2144714	http://amigo.geneontology.org/cgi-bin/amigo/term_details?term=GO:0008061
sulfur compound transmembrane transporter activity	Gene Ontology	GO:1901682	3	10	0.00346851	0.0752081	KQ087366:601329-603986|KQ087375:930620-932510|KQ087358:1380165-1382271	http://amigo.geneontology.org/cgi-bin/amigo/term_details?term=GO:1901682
sulfur compound metabolic process	Gene Ontology	GO:0006790	8	94	0.00351111	0.0752081	KQ087358:829077-832215|KQ087366:601329-603986|KQ087361:497876-498573|KQ087362:2481880-2484141|KQ087363:1088182-1089795|KQ087362:862662-866724|KQ087362:2285060-2286293|KQ087362:2478582-2479567	http://amigo.geneontology.org/cgi-bin/amigo/term_details?term=GO:0006790
lipid biosynthetic process	Gene Ontology	GO:0008610	10	142	0.00416976	0.0844187	KQ087362:1491668-1493040|KQ087369:690204-691637|KQ087373:200757-201957|KQ087358:1660322-1672264|KQ087360:2567613-2574708|KQ087362:2915437-2921767|KQ087360:37254-39213|KQ087358:2205989-2207522|KQ087362:862662-866724|KQ087362:2924274-2929987	http://amigo.geneontology.org/cgi-bin/amigo/term_details?term=GO:0008610
emericellamide metabolic process	Gene Ontology	GO:1900555	3	11	0.00433523	0.0844187	KQ087358:1660322-1672264|KQ087360:37254-39213|KQ087358:2205989-2207522	http://amigo.geneontology.org/cgi-bin/amigo/term_details?term=GO:1900555
emericellamide biosynthetic process	Gene Ontology	GO:1900557	3	11	0.00433523	0.0844187	KQ087358:1660322-1672264|KQ087360:37254-39213|KQ087358:2205989-2207522	http://amigo.geneontology.org/cgi-bin/amigo/term_details?term=GO:1900557
depsipeptide metabolic process	Gene Ontology	GO:0050761	3	11	0.00433523	0.0844187	KQ087358:1660322-1672264|KQ087360:37254-39213|KQ087358:2205989-2207522	http://amigo.geneontology.org/cgi-bin/amigo/term_details?term=GO:0050761
depsipeptide biosynthetic process	Gene Ontology	GO:0050763	3	11	0.00433523	0.0844187	KQ087358:1660322-1672264|KQ087360:37254-39213|KQ087358:2205989-2207522	http://amigo.geneontology.org/cgi-bin/amigo/term_details?term=GO:0050763
small molecule metabolic process	Gene Ontology	GO:0044281	28	667	0.00627312	0.11677	KQ087361:497876-498573|KQ087365:1642849-1644666|KQ087358:1286557-1288080|KQ087362:2924274-2929987|KQ087374:247101-249213|KQ087375:490863-493383|KQ087360:34988-36578|KQ087358:2205989-2207522|KQ087362:2285060-2286293|KQ087364:478120-481786|KQ087363:1088182-1089795|KQ087370:266103-267749|KQ087365:2369227-2370352|KQ087360:2567613-2574708|KQ087360:2194518-2195525|KQ087360:2667102-2669282|KQ087362:2481…	http://amigo.geneontology.org/cgi-bin/amigo/term_details?term=GO:0044281
lactone metabolic process	Gene Ontology	GO:1901334	3	13	0.00643274	0.11677	KQ087358:1660322-1672264|KQ087360:37254-39213|KQ087358:2205989-2207522	http://amigo.geneontology.org/cgi-bin/amigo/term_details?term=GO:1901334
lactone biosynthetic process	Gene Ontology	GO:1901336	3	13	0.00643274	0.11677	KQ087358:1660322-1672264|KQ087360:37254-39213|KQ087358:2205989-2207522	http://amigo.geneontology.org/cgi-bin/amigo/term_details?term=GO:1901336
serine family amino acid metabolic process	Gene Ontology	GO:0009069	4	27	0.00658802	0.117596	KQ087362:2478582-2479567|KQ087375:490863-493383|KQ087363:1088182-1089795|KQ087363:2161676-2163275	http://amigo.geneontology.org/cgi-bin/amigo/term_details?term=GO:0009069
carbohydrate metabolic process	Gene Ontology	GO:0005975	19	400	0.00721032	0.126594	KQ087367:356152-357382|KQ087358:1775025-1776704|KQ087364:100407-102613|KQ087363:1007886-1012571|KQ087367:1525784-1528662|KQ087373:591830-593646|KQ087365:449005-449578|KQ087364:910390-912706|KQ087367:532772-534988|KQ087358:1526267-1527664|KQ087360:750478-752036|KQ087363:118552-120324|KQ087360:2194518-2195525|KQ087374:241916-243284|KQ087360:1899458-1907109|KQ087376:56623-57856|KQ087365:447988-44893…	http://amigo.geneontology.org/cgi-bin/amigo/term_details?term=GO:0005975
carbohydrate binding	Gene Ontology	GO:0030246	5	45	0.00732946	0.126611	KQ087367:356152-357382|KQ087358:1526267-1527664|KQ087364:100407-102613|KQ087373:591830-593646|KQ087362:2998114-2999250	http://amigo.geneontology.org/cgi-bin/amigo/term_details?term=GO:0030246
positive regulation of asexual reproduction	Gene Ontology	GO:1903666	3	14	0.00767149	0.128378	KQ087366:1113367-1114312|KQ087375:289977-291200|KQ087362:862662-866724	http://amigo.geneontology.org/cgi-bin/amigo/term_details?term=GO:1903666
serine family amino acid biosynthetic process	Gene Ontology	GO:0009070	3	14	0.00767149	0.128378	KQ087362:2478582-2479567|KQ087363:1088182-1089795|KQ087363:2161676-2163275	http://amigo.geneontology.org/cgi-bin/amigo/term_details?term=GO:0009070
monocarboxylic acid biosynthetic process	Gene Ontology	GO:0072330	5	46	0.00796757	0.131281	KQ087362:862662-866724|KQ087360:2567613-2574708|KQ087369:690204-691637|KQ087362:2915437-2921767|KQ087370:266103-267749	http://amigo.geneontology.org/cgi-bin/amigo/term_details?term=GO:0072330
oxidation-reduction process	Gene Ontology	GO:0055114	25	589	0.008509	0.138078	KQ087361:497876-498573|KQ087360:2192566-2193797|KQ087359:427923-429827|KQ087358:1286557-1288080|KQ087365:621086-622320|KQ087360:124196-127151|KQ087367:1671961-1673346|KQ087363:889145-890432|KQ087360:34988-36578|KQ087364:1203653-1205335|KQ087370:266103-267749|KQ087367:1452001-1454099|KQ087365:2369227-2370352|KQ087360:2194518-2195525|KQ087360:2667102-2669282|KQ087359:2283519-2284864|KQ087362:248188…	http://amigo.geneontology.org/cgi-bin/amigo/term_details?term=GO:0055114
cellulase activity	Gene Ontology	GO:0008810	3	15	0.00904137	0.144438	KQ087358:1526267-1527664|KQ087373:591830-593646|KQ087362:2998114-2999250	http://amigo.geneontology.org/cgi-bin/amigo/term_details?term=GO:0008810
oxoacid metabolic process	Gene Ontology	GO:0043436	15	295	0.00933685	0.144924	KQ087370:266103-267749|KQ087369:690204-691637|KQ087363:2161676-2163275|KQ087362:2915437-2921767|KQ087375:490863-493383|KQ087360:2567613-2574708|KQ087365:1642849-1644666|KQ087361:497876-498573|KQ087360:2667102-2669282|KQ087373:131465-132914|KQ087363:1088182-1089795|KQ087362:862662-866724|KQ087367:1886428-1889941|KQ087362:2285060-2286293|KQ087362:2478582-2479567	http://amigo.geneontology.org/cgi-bin/amigo/term_details?term=GO:0043436
carbohydrate catabolic process	Gene Ontology	GO:0016052	8	113	0.00970654	0.14851	KQ087367:356152-357382|KQ087376:56623-57856|KQ087365:449005-449578|KQ087360:2194518-2195525|KQ087358:1526267-1527664|KQ087364:910390-912706|KQ087365:447988-448935|KQ087362:2998114-2999250	http://amigo.geneontology.org/cgi-bin/amigo/term_details?term=GO:0016052
fatty acid biosynthetic process	Gene Ontology	GO:0006633	4	32	0.0112137	0.166804	KQ087362:862662-866724|KQ087360:2567613-2574708|KQ087369:690204-691637|KQ087362:2915437-2921767	http://amigo.geneontology.org/cgi-bin/amigo/term_details?term=GO:0006633
hemicellulose catabolic process	Gene Ontology	GO:2000895	2	5	0.0115861	0.167686	KQ087358:1526267-1527664|KQ087376:56623-57856	http://amigo.geneontology.org/cgi-bin/amigo/term_details?term=GO:2000895
long-chain fatty acid metabolic process	Gene Ontology	GO:0001676	2	5	0.0115861	0.167686	KQ087360:2567613-2574708|KQ087362:2915437-2921767	http://amigo.geneontology.org/cgi-bin/amigo/term_details?term=GO:0001676
organic hydroxy compound metabolic process	Gene Ontology	GO:1901615	9	143	0.0124347	0.177568	KQ087370:266103-267749|KQ087365:2369227-2370352|KQ087374:247101-249213|KQ087365:2372967-2378471|KQ087367:1849073-1850422|KQ087360:37254-39213|KQ087360:34988-36578|KQ087358:2205989-2207522|KQ087360:2194518-2195525	http://amigo.geneontology.org/cgi-bin/amigo/term_details?term=GO:1901615
cellular polysaccharide metabolic process	Gene Ontology	GO:0044264	6	74	0.0135452	0.19088	KQ087360:1899458-1907109|KQ087367:1525784-1528662|KQ087365:449005-449578|KQ087367:532772-534988|KQ087358:1526267-1527664|KQ087365:447988-448935	http://amigo.geneontology.org/cgi-bin/amigo/term_details?term=GO:0044264
unsaturated fatty acid biosynthetic process	Gene Ontology	GO:0006636	2	6	0.0152002	0.206069	KQ087369:690204-691637|KQ087362:862662-866724	http://amigo.geneontology.org/cgi-bin/amigo/term_details?term=GO:0006636
unsaturated fatty acid metabolic process	Gene Ontology	GO:0033559	2	6	0.0152002	0.206069	KQ087369:690204-691637|KQ087362:862662-866724	http://amigo.geneontology.org/cgi-bin/amigo/term_details?term=GO:0033559
carboxylic acid metabolic process	Gene Ontology	GO:0019752	14	285	0.0154017	0.20619	KQ087370:266103-267749|KQ087369:690204-691637|KQ087363:2161676-2163275|KQ087362:2915437-2921767|KQ087375:490863-493383|KQ087360:2567613-2574708|KQ087361:497876-498573|KQ087360:2667102-2669282|KQ087373:131465-132914|KQ087363:1088182-1089795|KQ087362:862662-866724|KQ087367:1886428-1889941|KQ087362:2285060-2286293|KQ087362:2478582-2479567	http://amigo.geneontology.org/cgi-bin/amigo/term_details?term=GO:0019752
lipid metabolic process	Gene Ontology	GO:0006629	13	263	0.0183731	0.242934	KQ087362:1491668-1493040|KQ087369:690204-691637|KQ087373:200757-201957|KQ087358:1660322-1672264|KQ087373:742427-746105|KQ087362:2915437-2921767|KQ087362:862662-866724|KQ087360:37254-39213|KQ087358:2205989-2207522|KQ087360:2792129-2797401|KQ087364:436629-439806|KQ087360:2567613-2574708|KQ087362:2924274-2929987	http://amigo.geneontology.org/cgi-bin/amigo/term_details?term=GO:0006629
spore wall	Gene Ontology	GO:0031160	2	7	0.0192302	0.248856	KQ087360:1899458-1907109|KQ087374:264300-264824	http://amigo.geneontology.org/cgi-bin/amigo/term_details?term=GO:0031160
transferase activity	Gene Ontology	GO:0016740	27	699	0.0192857	0.248856	KQ087360:1899458-1907109|KQ087360:750478-752036|KQ087363:1004790-1007418|KQ087362:622829-624191|KQ087361:497876-498573|KQ087364:910390-912706|KQ087363:629074-630563|KQ087358:1775025-1776704|KQ087365:621086-622320|KQ087373:200757-201957|KQ087360:37254-39213|KQ087375:490863-493383|KQ087362:2924274-2929987|KQ087358:2188679-2196071|KQ087358:2205989-2207522|KQ087360:1818185-1819885|KQ087363:1088182-10…	http://amigo.geneontology.org/cgi-bin/amigo/term_details?term=GO:0016740
organic acid transport	Gene Ontology	GO:0015849	3	21	0.0201373	0.256751	KQ087375:930620-932510|KQ087358:1380165-1382271|KQ087365:2369227-2370352	http://amigo.geneontology.org/cgi-bin/amigo/term_details?term=GO:0015849
organic hydroxy compound biosynthetic process	Gene Ontology	GO:1901617	7	106	0.0209599	0.264095	KQ087365:2369227-2370352|KQ087374:247101-249213|KQ087365:2372967-2378471|KQ087367:1849073-1850422|KQ087360:37254-39213|KQ087360:34988-36578|KQ087358:2205989-2207522	http://amigo.geneontology.org/cgi-bin/amigo/term_details?term=GO:1901617
nonribosomal peptide biosynthetic process	Gene Ontology	GO:0019184	3	22	0.0224783	0.279933	KQ087358:1660322-1672264|KQ087358:1651081-1654414|KQ087362:429370-433224	http://amigo.geneontology.org/cgi-bin/amigo/term_details?term=GO:0019184
metabolic process	Gene Ontology	GO:0008152	94	3127	0.0228596	0.28141	KQ087367:1525784-1528662|KQ087376:94291-96718|KQ087374:241916-243284|KQ087360:750478-752036|KQ087363:3265873-3267451|KQ087373:200757-201957|KQ087360:37254-39213|KQ087365:801826-807624|KQ087363:889145-890432|KQ087360:34988-36578|KQ087364:478120-481786|KQ087375:289977-291200|KQ087358:1651081-1654414|KQ087367:372911-374048|KQ087364:436629-439806|KQ087367:1886428-1889941|KQ087362:2478582-2479567|KQ08…	http://amigo.geneontology.org/cgi-bin/amigo/term_details?term=GO:0008152
sulfur amino acid metabolic process	Gene Ontology	GO:0000096	2	8	0.0236535	0.28464	KQ087363:1088182-1089795|KQ087362:2481880-2484141	http://amigo.geneontology.org/cgi-bin/amigo/term_details?term=GO:0000096
barrier septum	Gene Ontology	GO:0000935	2	8	0.0236535	0.28464	KQ087360:1899458-1907109|KQ087367:532772-534988	http://amigo.geneontology.org/cgi-bin/amigo/term_details?term=GO:0000935
alpha-amino acid biosynthetic process	Gene Ontology	GO:1901607	5	62	0.0239409	0.284896	KQ087362:2478582-2479567|KQ087375:490863-493383|KQ087361:497876-498573|KQ087363:1088182-1089795|KQ087363:2161676-2163275	http://amigo.geneontology.org/cgi-bin/amigo/term_details?term=GO:1901607
positive regulation of sporulation	Gene Ontology	GO:0043938	3	23	0.024961	0.291646	KQ087366:1113367-1114312|KQ087375:289977-291200|KQ087362:862662-866724	http://amigo.geneontology.org/cgi-bin/amigo/term_details?term=GO:0043938
organonitrogen compound metabolic process	Gene Ontology	GO:1901564	26	683	0.0251109	0.291646	KQ087363:1007886-1012571|KQ087370:266103-267749|KQ087367:532772-534988|KQ087358:1651081-1654414|KQ087361:497876-498573|KQ087373:200757-201957|KQ087360:37254-39213|KQ087375:490863-493383|KQ087360:34988-36578|KQ087358:2205989-2207522|KQ087364:478120-481786|KQ087363:1088182-1089795|KQ087362:1491668-1493040|KQ087363:2161676-2163275|KQ087358:1660322-1672264|KQ087362:2481880-2484141|KQ087362:2285060-22…	http://amigo.geneontology.org/cgi-bin/amigo/term_details?term=GO:1901564
cellular amino acid biosynthetic process	Gene Ontology	GO:0008652	5	63	0.0253424	0.291646	KQ087362:2478582-2479567|KQ087375:490863-493383|KQ087361:497876-498573|KQ087363:1088182-1089795|KQ087363:2161676-2163275	http://amigo.geneontology.org/cgi-bin/amigo/term_details?term=GO:0008652
catalytic activity	Gene Ontology	GO:0003824	83	2724	0.0255974	0.291646	KQ087358:2186638-2188440|KQ087360:1899458-1907109|KQ087363:1007886-1012571|KQ087360:2192566-2193797|KQ087370:266103-267749|KQ087363:3259294-3261281|KQ087363:1004790-1007418|KQ087369:867503-869432|KQ087362:622829-624191|KQ087360:2667102-2669282|KQ087358:1651081-1654414|KQ087360:712599-714563|KQ087360:750478-752036|KQ087375:490863-493383|KQ087359:427923-429827|KQ087362:429370-433224|KQ087364:910390…	http://amigo.geneontology.org/cgi-bin/amigo/term_details?term=GO:0003824
chitin metabolic process	Gene Ontology	GO:0006030	3	24	0.0275853	0.301669	KQ087363:1007886-1012571|KQ087367:532772-534988|KQ087358:2139490-2144714	http://amigo.geneontology.org/cgi-bin/amigo/term_details?term=GO:0006030
alcohol metabolic process	Gene Ontology	GO:0006066	6	88	0.0277417	0.301669	KQ087370:266103-267749|KQ087374:247101-249213|KQ087360:37254-39213|KQ087360:34988-36578|KQ087358:2205989-2207522|KQ087360:2194518-2195525	http://amigo.geneontology.org/cgi-bin/amigo/term_details?term=GO:0006066
amino acid import	Gene Ontology	GO:0043090	2	9	0.0284487	0.301669	KQ087375:930620-932510|KQ087365:2369227-2370352	http://amigo.geneontology.org/cgi-bin/amigo/term_details?term=GO:0043090
O-acyltransferase activity	Gene Ontology	GO:0008374	2	9	0.0284487	0.301669	KQ087360:37254-39213|KQ087363:2161676-2163275	http://amigo.geneontology.org/cgi-bin/amigo/term_details?term=GO:0008374
L-methionine biosynthetic process	Gene Ontology	GO:0071265	2	9	0.0284487	0.301669	KQ087375:490863-493383|KQ087363:1088182-1089795	http://amigo.geneontology.org/cgi-bin/amigo/term_details?term=GO:0071265
xyloglucan metabolic process	Gene Ontology	GO:0010411	2	9	0.0284487	0.301669	KQ087358:1526267-1527664|KQ087367:1525784-1528662	http://amigo.geneontology.org/cgi-bin/amigo/term_details?term=GO:0010411
oxidoreductase activity, acting on a sulfur group of donors	Gene Ontology	GO:0016667	3	25	0.0303507	0.318683	KQ087358:829077-832215|KQ087363:889145-890432|KQ087362:2478582-2479567	http://amigo.geneontology.org/cgi-bin/amigo/term_details?term=GO:0016667
shamixanthone biosynthetic process	Gene Ontology	GO:1900793	2	10	0.0335951	0.336265	KQ087367:1849073-1850422|KQ087365:2372967-2378471	http://amigo.geneontology.org/cgi-bin/amigo/term_details?term=GO:1900793
positive regulation of asexual sporulation resulting in formation of a cellular spore	Gene Ontology	GO:0043945	2	10	0.0335951	0.336265	KQ087375:289977-291200|KQ087362:862662-866724	http://amigo.geneontology.org/cgi-bin/amigo/term_details?term=GO:0043945
shamixanthone metabolic process	Gene Ontology	GO:1900791	2	10	0.0335951	0.336265	KQ087367:1849073-1850422|KQ087365:2372967-2378471	http://amigo.geneontology.org/cgi-bin/amigo/term_details?term=GO:1900791
ethanol metabolic process	Gene Ontology	GO:0006067	2	10	0.0335951	0.336265	KQ087374:247101-249213|KQ087370:266103-267749	http://amigo.geneontology.org/cgi-bin/amigo/term_details?term=GO:0006067
cellular carbohydrate metabolic process	Gene Ontology	GO:0044262	8	146	0.0356585	0.353613	KQ087360:1899458-1907109|KQ087360:750478-752036|KQ087367:1525784-1528662|KQ087365:449005-449578|KQ087367:532772-534988|KQ087360:2194518-2195525|KQ087358:1526267-1527664|KQ087365:447988-448935	http://amigo.geneontology.org/cgi-bin/amigo/term_details?term=GO:0044262
organonitrogen compound biosynthetic process	Gene Ontology	GO:1901566	19	482	0.0388863	0.37424	KQ087362:1491668-1493040|KQ087362:429370-433224|KQ087373:200757-201957|KQ087363:2161676-2163275|KQ087358:1660322-1672264|KQ087375:490863-493383|KQ087367:532772-534988|KQ087363:537092-537675|KQ087358:1651081-1654414|KQ087360:34988-36578|KQ087358:2205989-2207522|KQ087367:1849073-1850422|KQ087360:37254-39213|KQ087367:372911-374048|KQ087363:1088182-1089795|KQ087361:497876-498573|KQ087367:1886428-1889…	http://amigo.geneontology.org/cgi-bin/amigo/term_details?term=GO:1901566
cell wall macromolecule catabolic process	Gene Ontology	GO:0016998	2	11	0.0390727	0.37424	KQ087363:1007886-1012571|KQ087358:2139490-2144714	http://amigo.geneontology.org/cgi-bin/amigo/term_details?term=GO:0016998
L-amino acid transmembrane transporter activity	Gene Ontology	GO:0015179	2	11	0.0390727	0.37424	KQ087375:930620-932510|KQ087358:1380165-1382271	http://amigo.geneontology.org/cgi-bin/amigo/term_details?term=GO:0015179
monocarboxylic acid metabolic process	Gene Ontology	GO:0032787	7	122	0.0392349	0.37424	KQ087370:266103-267749|KQ087369:690204-691637|KQ087362:2915437-2921767|KQ087360:2567613-2574708|KQ087373:131465-132914|KQ087362:862662-866724|KQ087362:2285060-2286293	http://amigo.geneontology.org/cgi-bin/amigo/term_details?term=GO:0032787
glucosamine-containing compound metabolic process	Gene Ontology	GO:1901071	3	28	0.0394856	0.37424	KQ087363:1007886-1012571|KQ087367:532772-534988|KQ087358:2139490-2144714	http://amigo.geneontology.org/cgi-bin/amigo/term_details?term=GO:1901071
fungal-type cell wall	Gene Ontology	GO:0009277	5	72	0.0403344	0.378931	KQ087368:138458-140429|KQ087360:1899458-1907109|KQ087375:490863-493383|KQ087363:1088182-1089795|KQ087374:264300-264824	http://amigo.geneontology.org/cgi-bin/amigo/term_details?term=GO:0009277
aminoglycan metabolic process	Gene Ontology	GO:0006022	3	29	0.0428062	0.391435	KQ087363:1007886-1012571|KQ087367:532772-534988|KQ087358:2139490-2144714	http://amigo.geneontology.org/cgi-bin/amigo/term_details?term=GO:0006022
carboxylic acid transmembrane transporter activity	Gene Ontology	GO:0046943	3	29	0.0428062	0.391435	KQ087369:587487-589168|KQ087375:930620-932510|KQ087358:1380165-1382271	http://amigo.geneontology.org/cgi-bin/amigo/term_details?term=GO:0046943
cellular response to drug	Gene Ontology	GO:0035690	8	152	0.0431273	0.391435	KQ087362:1491668-1493040|KQ087360:1899458-1907109|KQ087360:2194518-2195525|KQ087362:2915437-2921767|KQ087358:1651081-1654414|KQ087365:308012-309649|KQ087366:1736570-1737723|KQ087362:2478582-2479567	http://amigo.geneontology.org/cgi-bin/amigo/term_details?term=GO:0035690
xylan metabolic process	Gene Ontology	GO:0045491	2	12	0.0448622	0.393832	KQ087367:356152-357382|KQ087364:910390-912706	http://amigo.geneontology.org/cgi-bin/amigo/term_details?term=GO:0045491
xylan catabolic process	Gene Ontology	GO:0045493	2	12	0.0448622	0.393832	KQ087367:356152-357382|KQ087364:910390-912706	http://amigo.geneontology.org/cgi-bin/amigo/term_details?term=GO:0045493
sulfur compound transport	Gene Ontology	GO:0072348	2	12	0.0448622	0.393832	KQ087366:601329-603986|KQ087375:930620-932510	http://amigo.geneontology.org/cgi-bin/amigo/term_details?term=GO:0072348
acyl-CoA dehydrogenase activity	Gene Ontology	GO:0003995	2	12	0.0448622	0.393832	KQ087367:1452001-1454099|KQ087367:1671961-1673346	http://amigo.geneontology.org/cgi-bin/amigo/term_details?term=GO:0003995
organic acid transmembrane transporter activity	Gene Ontology	GO:0005342	3	30	0.0462621	0.402818	KQ087369:587487-589168|KQ087375:930620-932510|KQ087358:1380165-1382271	http://amigo.geneontology.org/cgi-bin/amigo/term_details?term=GO:0005342
flavin adenine dinucleotide binding	Gene Ontology	GO:0050660	6	101	0.0475781	0.410937	KQ087367:1671961-1673346|KQ087375:436511-438273|KQ087360:124196-127151|KQ087360:712599-714563|KQ087359:427923-429827|KQ087364:1203653-1205335	http://amigo.geneontology.org/cgi-bin/amigo/term_details?term=GO:0050660
oxidoreductase activity, acting on the CH-CH group of donors	Gene Ontology	GO:0016627	3	31	0.0498515	0.422965	KQ087367:1452001-1454099|KQ087362:2915437-2921767|KQ087367:1671961-1673346	http://amigo.geneontology.org/cgi-bin/amigo/term_details?term=GO:0016627
cell wall	Gene Ontology	GO:0005618	5	77	0.0505747	0.422965	KQ087368:138458-140429|KQ087360:1899458-1907109|KQ087375:490863-493383|KQ087363:1088182-1089795|KQ087374:264300-264824	http://amigo.geneontology.org/cgi-bin/amigo/term_details?term=GO:0005618
sphingolipid biosynthetic process	Gene Ontology	GO:0030148	2	13	0.0509454	0.422965	KQ087362:1491668-1493040|KQ087373:200757-201957	http://amigo.geneontology.org/cgi-bin/amigo/term_details?term=GO:0030148
chitin catabolic process	Gene Ontology	GO:0006032	2	13	0.0509454	0.422965	KQ087363:1007886-1012571|KQ087358:2139490-2144714	http://amigo.geneontology.org/cgi-bin/amigo/term_details?term=GO:0006032
external encapsulating structure	Gene Ontology	GO:0030312	5	78	0.0527897	0.434906	KQ087368:138458-140429|KQ087360:1899458-1907109|KQ087375:490863-493383|KQ087363:1088182-1089795|KQ087374:264300-264824	http://amigo.geneontology.org/cgi-bin/amigo/term_details?term=GO:0030312
transferase activity, transferring hexosyl groups	Gene Ontology	GO:0016758	4	54	0.0534107	0.436663	KQ087362:1491668-1493040|KQ087360:1899458-1907109|KQ087373:200757-201957|KQ087360:1818185-1819885	http://amigo.geneontology.org/cgi-bin/amigo/term_details?term=GO:0016758
alpha-amino acid metabolic process	Gene Ontology	GO:1901605	6	106	0.0570662	0.45896	KQ087370:266103-267749|KQ087361:497876-498573|KQ087363:2161676-2163275|KQ087375:490863-493383|KQ087363:1088182-1089795|KQ087362:2478582-2479567	http://amigo.geneontology.org/cgi-bin/amigo/term_details?term=GO:1901605
O-methyltransferase activity	Gene Ontology	GO:0008171	2	14	0.0573043	0.45896	KQ087363:629074-630563|KQ087362:622829-624191	http://amigo.geneontology.org/cgi-bin/amigo/term_details?term=GO:0008171
amino sugar metabolic process	Gene Ontology	GO:0006040	3	33	0.0574235	0.45896	KQ087363:1007886-1012571|KQ087367:532772-534988|KQ087358:2139490-2144714	http://amigo.geneontology.org/cgi-bin/amigo/term_details?term=GO:0006040
anion transport	Gene Ontology	GO:0006820	4	56	0.0591482	0.469242	KQ087366:601329-603986|KQ087365:1642849-1644666|KQ087369:587487-589168|KQ087375:930620-932510	http://amigo.geneontology.org/cgi-bin/amigo/term_details?term=GO:0006820
transferase activity, transferring glycosyl groups	Gene Ontology	GO:0016757	5	81	0.0597696	0.470685	KQ087362:1491668-1493040|KQ087360:1899458-1907109|KQ087364:910390-912706|KQ087373:200757-201957|KQ087360:1818185-1819885	http://amigo.geneontology.org/cgi-bin/amigo/term_details?term=GO:0016757
response to drug	Gene Ontology	GO:0042493	8	165	0.0626764	0.489974	KQ087362:1491668-1493040|KQ087360:1899458-1907109|KQ087360:2194518-2195525|KQ087362:2915437-2921767|KQ087358:1651081-1654414|KQ087365:308012-309649|KQ087366:1736570-1737723|KQ087362:2478582-2479567	http://amigo.geneontology.org/cgi-bin/amigo/term_details?term=GO:0042493
glucosamine-containing compound catabolic process	Gene Ontology	GO:1901072	2	15	0.063922	0.496091	KQ087363:1007886-1012571|KQ087358:2139490-2144714	http://amigo.geneontology.org/cgi-bin/amigo/term_details?term=GO:1901072
cellular response to nitrogen levels	Gene Ontology	GO:0043562	2	16	0.0707821	0.519231	KQ087366:1113367-1114312|KQ087365:2369227-2370352	http://amigo.geneontology.org/cgi-bin/amigo/term_details?term=GO:0043562
chitinase activity	Gene Ontology	GO:0004568	2	16	0.0707821	0.519231	KQ087363:1007886-1012571|KQ087358:2139490-2144714	http://amigo.geneontology.org/cgi-bin/amigo/term_details?term=GO:0004568
amino sugar catabolic process	Gene Ontology	GO:0046348	2	16	0.0707821	0.519231	KQ087363:1007886-1012571|KQ087358:2139490-2144714	http://amigo.geneontology.org/cgi-bin/amigo/term_details?term=GO:0046348
aminoglycan catabolic process	Gene Ontology	GO:0006026	2	16	0.0707821	0.519231	KQ087363:1007886-1012571|KQ087358:2139490-2144714	http://amigo.geneontology.org/cgi-bin/amigo/term_details?term=GO:0006026
cellular polysaccharide catabolic process	Gene Ontology	GO:0044247	2	16	0.0707821	0.519231	KQ087365:449005-449578|KQ087365:447988-448935	http://amigo.geneontology.org/cgi-bin/amigo/term_details?term=GO:0044247
cellular response to nitrogen starvation	Gene Ontology	GO:0006995	2	16	0.0707821	0.519231	KQ087366:1113367-1114312|KQ087365:2369227-2370352	http://amigo.geneontology.org/cgi-bin/amigo/term_details?term=GO:0006995
inorganic anion transmembrane transporter activity	Gene Ontology	GO:0015103	2	16	0.0707821	0.519231	KQ087366:601329-603986|KQ087365:1642849-1644666	http://amigo.geneontology.org/cgi-bin/amigo/term_details?term=GO:0015103
regulation of asexual sporulation	Gene Ontology	GO:0034305	3	37	0.0740775	0.539708	KQ087366:1113367-1114312|KQ087375:289977-291200|KQ087362:862662-866724	http://amigo.geneontology.org/cgi-bin/amigo/term_details?term=GO:0034305
positive regulation of developmental process	Gene Ontology	GO:0051094	3	38	0.0785413	0.568363	KQ087366:1113367-1114312|KQ087375:289977-291200|KQ087362:862662-866724	http://amigo.geneontology.org/cgi-bin/amigo/term_details?term=GO:0051094
regulation of asexual reproduction	Gene Ontology	GO:1903664	3	39	0.08312	0.59641	KQ087366:1113367-1114312|KQ087375:289977-291200|KQ087362:862662-866724	http://amigo.geneontology.org/cgi-bin/amigo/term_details?term=GO:1903664
positive regulation of transport	Gene Ontology	GO:0051050	2	18	0.085167	0.59641	KQ087363:3265873-3267451|KQ087365:2369227-2370352	http://amigo.geneontology.org/cgi-bin/amigo/term_details?term=GO:0051050
cell separation after cytokinesis	Gene Ontology	GO:0000920	2	18	0.085167	0.59641	KQ087365:449005-449578|KQ087365:447988-448935	http://amigo.geneontology.org/cgi-bin/amigo/term_details?term=GO:0000920
amino acid transmembrane transporter activity	Gene Ontology	GO:0015171	2	18	0.085167	0.59641	KQ087375:930620-932510|KQ087358:1380165-1382271	http://amigo.geneontology.org/cgi-bin/amigo/term_details?term=GO:0015171
alcohol biosynthetic process	Gene Ontology	GO:0046165	4	64	0.0852014	0.59641	KQ087374:247101-249213|KQ087360:37254-39213|KQ087360:34988-36578|KQ087358:2205989-2207522	http://amigo.geneontology.org/cgi-bin/amigo/term_details?term=GO:0046165
secondary active transmembrane transporter activity	Gene Ontology	GO:0015291	3	40	0.0878106	0.606743	KQ087366:601329-603986|KQ087365:1642849-1644666|KQ087375:930620-932510	http://amigo.geneontology.org/cgi-bin/amigo/term_details?term=GO:0015291
cellular amino acid metabolic process	Gene Ontology	GO:0006520	7	149	0.0889523	0.610692	KQ087370:266103-267749|KQ087361:497876-498573|KQ087363:2161676-2163275|KQ087375:490863-493383|KQ087363:1088182-1089795|KQ087367:1886428-1889941|KQ087362:2478582-2479567	http://amigo.geneontology.org/cgi-bin/amigo/term_details?term=GO:0006520
coenzyme binding	Gene Ontology	GO:0050662	8	180	0.0911923	0.616405	KQ087367:1671961-1673346|KQ087360:2667102-2669282|KQ087375:436511-438273|KQ087360:124196-127151|KQ087360:712599-714563|KQ087359:427923-429827|KQ087373:131465-132914|KQ087364:1203653-1205335	http://amigo.geneontology.org/cgi-bin/amigo/term_details?term=GO:0050662
cellular carbohydrate catabolic process	Gene Ontology	GO:0044275	3	41	0.0926105	0.616405	KQ087365:449005-449578|KQ087360:2194518-2195525|KQ087365:447988-448935	http://amigo.geneontology.org/cgi-bin/amigo/term_details?term=GO:0044275
positive regulation of sporulation resulting in formation of a cellular spore	Gene Ontology	GO:0045881	2	19	0.0926622	0.616405	KQ087375:289977-291200|KQ087362:862662-866724	http://amigo.geneontology.org/cgi-bin/amigo/term_details?term=GO:0045881
regulation of asexual sporulation resulting in formation of a cellular spore	Gene Ontology	GO:0043943	2	19	0.0926622	0.616405	KQ087375:289977-291200|KQ087362:862662-866724	http://amigo.geneontology.org/cgi-bin/amigo/term_details?term=GO:0043943
glucosidase activity	Gene Ontology	GO:0015926	2	19	0.0926622	0.616405	KQ087365:449005-449578|KQ087365:447988-448935	http://amigo.geneontology.org/cgi-bin/amigo/term_details?term=GO:0015926
phenol-containing compound biosynthetic process	Gene Ontology	GO:0046189	3	42	0.0975166	0.644693	KQ087367:1849073-1850422|KQ087365:2372967-2378471|KQ087365:2369227-2370352	http://amigo.geneontology.org/cgi-bin/amigo/term_details?term=GO:0046189
fatty acid metabolic process	Gene Ontology	GO:0006631	4	68	0.100007	0.647377	KQ087362:862662-866724|KQ087360:2567613-2574708|KQ087369:690204-691637|KQ087362:2915437-2921767	http://amigo.geneontology.org/cgi-bin/amigo/term_details?term=GO:0006631
positive regulation of cell differentiation	Gene Ontology	GO:0045597	2	20	0.10034	0.647377	KQ087375:289977-291200|KQ087362:862662-866724	http://amigo.geneontology.org/cgi-bin/amigo/term_details?term=GO:0045597
inorganic anion transport	Gene Ontology	GO:0015698	2	20	0.10034	0.647377	KQ087366:601329-603986|KQ087365:1642849-1644666	http://amigo.geneontology.org/cgi-bin/amigo/term_details?term=GO:0015698
sphingolipid metabolic process	Gene Ontology	GO:0006665	2	20	0.10034	0.647377	KQ087362:1491668-1493040|KQ087373:200757-201957	http://amigo.geneontology.org/cgi-bin/amigo/term_details?term=GO:0006665
single-organism process	Gene Ontology	GO:0044699	66	2274	0.107636	0.687213	KQ087360:1899458-1907109|KQ087367:1671961-1673346|KQ087360:2192566-2193797|KQ087366:601329-603986|KQ087363:889145-890432|KQ087367:532772-534988|KQ087362:622829-624191|KQ087365:1642849-1644666|KQ087367:1452001-1454099|KQ087363:3265873-3267451|KQ087360:2792129-2797401|KQ087359:427923-429827|KQ087362:429370-433224|KQ087358:1286557-1288080|KQ087362:2924274-2929987|KQ087358:1380165-1382271|KQ087363:21…	http://amigo.geneontology.org/cgi-bin/amigo/term_details?term=GO:0044699
oxidoreductase activity, acting on CH-OH group of donors	Gene Ontology	GO:0016614	6	127	0.10844	0.687213	KQ087360:2667102-2669282|KQ087360:124196-127151|KQ087375:436511-438273|KQ087359:427923-429827|KQ087373:131465-132914|KQ087362:2924274-2929987	http://amigo.geneontology.org/cgi-bin/amigo/term_details?term=GO:0016614
transferase activity, transferring acyl groups	Gene Ontology	GO:0016746	7	158	0.111024	0.699448	KQ087360:750478-752036|KQ087365:621086-622320|KQ087363:2161676-2163275|KQ087360:37254-39213|KQ087362:2915437-2921767|KQ087358:2205989-2207522|KQ087362:2924274-2929987	http://amigo.geneontology.org/cgi-bin/amigo/term_details?term=GO:0016746
organic substance metabolic process	Gene Ontology	GO:0071704	70	2433	0.112552	0.703092	KQ087360:1899458-1907109|KQ087363:1007886-1012571|KQ087367:1525784-1528662|KQ087370:266103-267749|KQ087365:801826-807624|KQ087376:94291-96718|KQ087363:1004790-1007418|KQ087367:532772-534988|KQ087365:2372967-2378471|KQ087360:2667102-2669282|KQ087358:1651081-1654414|KQ087360:750478-752036|KQ087363:3265873-3267451|KQ087362:429370-433224|KQ087371:585381-586918|KQ087375:490863-493383|KQ087362:2924274-…	http://amigo.geneontology.org/cgi-bin/amigo/term_details?term=GO:0071704
oxidoreductase activity, acting on the aldehyde or oxo group of donors	Gene Ontology	GO:0016903	3	46	0.118144	0.703092	KQ087358:829077-832215|KQ087373:131465-132914|KQ087370:266103-267749	http://amigo.geneontology.org/cgi-bin/amigo/term_details?term=GO:0016903
transferase activity, transferring alkyl or aryl (other than methyl) groups	Gene Ontology	GO:0016765	3	46	0.118144	0.703092	KQ087367:1849073-1850422|KQ087358:2204608-2205774|KQ087363:1088182-1089795	http://amigo.geneontology.org/cgi-bin/amigo/term_details?term=GO:0016765
small molecule binding	Gene Ontology	GO:0036094	25	771	0.118655	0.703092	KQ087361:497876-498573|KQ087363:1004790-1007418|KQ087358:1651081-1654414|KQ087360:712599-714563|KQ087359:427923-429827|KQ087358:1286557-1288080|KQ087360:124196-127151|KQ087362:429370-433224|KQ087367:1671961-1673346|KQ087358:2188679-2196071|KQ087364:1203653-1205335|KQ087363:1961113-1963312|KQ087373:597107-601040|KQ087358:1660322-1672264|KQ087360:2567613-2574708|KQ087366:1209805-1211239|KQ087360:26…	http://amigo.geneontology.org/cgi-bin/amigo/term_details?term=GO:0036094
glucan catabolic process	Gene Ontology	GO:0009251	2	23	0.124342	0.703092	KQ087358:1526267-1527664|KQ087362:2998114-2999250	http://amigo.geneontology.org/cgi-bin/amigo/term_details?term=GO:0009251
barrier septum assembly	Gene Ontology	GO:0000917	2	23	0.124342	0.703092	KQ087360:1899458-1907109|KQ087367:532772-534988	http://amigo.geneontology.org/cgi-bin/amigo/term_details?term=GO:0000917
phenol-containing compound metabolic process	Gene Ontology	GO:0018958	3	48	0.129017	0.703092	KQ087367:1849073-1850422|KQ087365:2372967-2378471|KQ087365:2369227-2370352	http://amigo.geneontology.org/cgi-bin/amigo/term_details?term=GO:0018958
peroxidase activity	Gene Ontology	GO:0004601	2	24	0.132624	0.703092	KQ087360:34988-36578|KQ087362:862662-866724	http://amigo.geneontology.org/cgi-bin/amigo/term_details?term=GO:0004601
anion transmembrane transporter activity	Gene Ontology	GO:0008509	2	24	0.132624	0.703092	KQ087366:601329-603986|KQ087365:1642849-1644666	http://amigo.geneontology.org/cgi-bin/amigo/term_details?term=GO:0008509
oxidoreductase activity, acting on single donors with incorporation of molecular oxygen	Gene Ontology	GO:0016701	2	24	0.132624	0.703092	KQ087362:862662-866724|KQ087360:2194518-2195525	http://amigo.geneontology.org/cgi-bin/amigo/term_details?term=GO:0016701
prenyltransferase activity	Gene Ontology	GO:0004659	2	24	0.132624	0.703092	KQ087367:1849073-1850422|KQ087358:2204608-2205774	http://amigo.geneontology.org/cgi-bin/amigo/term_details?term=GO:0004659
glucan biosynthetic process	Gene Ontology	GO:0009250	2	24	0.132624	0.703092	KQ087360:1899458-1907109|KQ087367:532772-534988	http://amigo.geneontology.org/cgi-bin/amigo/term_details?term=GO:0009250
neutral amino acid transport	Gene Ontology	GO:0015804	1	5	0.138391	0.703092	KQ087375:930620-932510	http://amigo.geneontology.org/cgi-bin/amigo/term_details?term=GO:0015804
alpha-glucan biosynthetic process	Gene Ontology	GO:0030979	1	5	0.138391	0.703092	KQ087360:1899458-1907109	http://amigo.geneontology.org/cgi-bin/amigo/term_details?term=GO:0030979
aldehyde catabolic process	Gene Ontology	GO:0046185	1	5	0.138391	0.703092	KQ087370:266103-267749	http://amigo.geneontology.org/cgi-bin/amigo/term_details?term=GO:0046185
positive regulation of conidium formation	Gene Ontology	GO:0075307	1	5	0.138391	0.703092	KQ087366:1113367-1114312	http://amigo.geneontology.org/cgi-bin/amigo/term_details?term=GO:0075307
peroxisome targeting sequence binding	Gene Ontology	GO:0000268	1	5	0.138391	0.703092	KQ087362:1196774-1198078	http://amigo.geneontology.org/cgi-bin/amigo/term_details?term=GO:0000268
secondary metabolite catabolic process	Gene Ontology	GO:0090487	1	5	0.138391	0.703092	KQ087360:37254-39213	http://amigo.geneontology.org/cgi-bin/amigo/term_details?term=GO:0090487
aldehyde dehydrogenase (NAD) activity	Gene Ontology	GO:0004029	1	5	0.138391	0.703092	KQ087370:266103-267749	http://amigo.geneontology.org/cgi-bin/amigo/term_details?term=GO:0004029
fungal-type cell wall chitin biosynthetic process	Gene Ontology	GO:0034221	1	5	0.138391	0.703092	KQ087367:532772-534988	http://amigo.geneontology.org/cgi-bin/amigo/term_details?term=GO:0034221
homocysteine metabolic process	Gene Ontology	GO:0050667	1	5	0.138391	0.703092	KQ087363:1088182-1089795	http://amigo.geneontology.org/cgi-bin/amigo/term_details?term=GO:0050667
polyphosphate metabolic process	Gene Ontology	GO:0006797	1	5	0.138391	0.703092	KQ087365:1642849-1644666	http://amigo.geneontology.org/cgi-bin/amigo/term_details?term=GO:0006797
oxidoreductase activity, acting on a sulfur group of donors, oxygen as acceptor	Gene Ontology	GO:0016670	1	5	0.138391	0.703092	KQ087363:889145-890432	http://amigo.geneontology.org/cgi-bin/amigo/term_details?term=GO:0016670
arginine import	Gene Ontology	GO:0090467	1	5	0.138391	0.703092	KQ087365:2369227-2370352	http://amigo.geneontology.org/cgi-bin/amigo/term_details?term=GO:0090467
palmitoyltransferase activity	Gene Ontology	GO:0016409	1	5	0.138391	0.703092	KQ087362:2915437-2921767	http://amigo.geneontology.org/cgi-bin/amigo/term_details?term=GO:0016409
ethanol biosynthetic process	Gene Ontology	GO:0006115	1	5	0.138391	0.703092	KQ087374:247101-249213	http://amigo.geneontology.org/cgi-bin/amigo/term_details?term=GO:0006115
coenzyme A metabolic process	Gene Ontology	GO:0015936	1	5	0.138391	0.703092	KQ087362:2285060-2286293	http://amigo.geneontology.org/cgi-bin/amigo/term_details?term=GO:0015936
L-arginine import	Gene Ontology	GO:0043091	1	5	0.138391	0.703092	KQ087365:2369227-2370352	http://amigo.geneontology.org/cgi-bin/amigo/term_details?term=GO:0043091
tryptophan dimethylallyltransferase activity	Gene Ontology	GO:0050364	1	5	0.138391	0.703092	KQ087367:1849073-1850422	http://amigo.geneontology.org/cgi-bin/amigo/term_details?term=GO:0050364
structural constituent of cell wall	Gene Ontology	GO:0005199	1	5	0.138391	0.703092	KQ087374:264300-264824	http://amigo.geneontology.org/cgi-bin/amigo/term_details?term=GO:0005199
manganese ion transport	Gene Ontology	GO:0006828	1	5	0.138391	0.703092	KQ087365:1642849-1644666	http://amigo.geneontology.org/cgi-bin/amigo/term_details?term=GO:0006828
cell cycle phase	Gene Ontology	GO:0022403	1	5	0.138391	0.703092	KQ087362:1491668-1493040	http://amigo.geneontology.org/cgi-bin/amigo/term_details?term=GO:0022403
catalase activity	Gene Ontology	GO:0004096	1	5	0.138391	0.703092	KQ087360:34988-36578	http://amigo.geneontology.org/cgi-bin/amigo/term_details?term=GO:0004096
regulation of beta-glucan biosynthetic process	Gene Ontology	GO:0032951	1	5	0.138391	0.703092	KQ087367:532772-534988	http://amigo.geneontology.org/cgi-bin/amigo/term_details?term=GO:0032951
cis-Golgi network	Gene Ontology	GO:0005801	1	5	0.138391	0.703092	KQ087373:200757-201957	http://amigo.geneontology.org/cgi-bin/amigo/term_details?term=GO:0005801
adenine biosynthetic process	Gene Ontology	GO:0046084	1	5	0.138391	0.703092	KQ087375:490863-493383	http://amigo.geneontology.org/cgi-bin/amigo/term_details?term=GO:0046084
oxidoreductase activity	Gene Ontology	GO:0016491	24	752	0.140215	0.703092	KQ087360:2192566-2193797|KQ087360:712599-714563|KQ087359:427923-429827|KQ087362:2924274-2929987|KQ087365:621086-622320|KQ087360:124196-127151|KQ087367:1671961-1673346|KQ087363:889145-890432|KQ087360:34988-36578|KQ087364:1203653-1205335|KQ087370:266103-267749|KQ087367:1452001-1454099|KQ087365:2369227-2370352|KQ087360:2194518-2195525|KQ087360:2667102-2669282|KQ087359:2283519-2284864|KQ087358:829077…	http://amigo.geneontology.org/cgi-bin/amigo/term_details?term=GO:0016491
cell septum	Gene Ontology	GO:0030428	3	50	0.140229	0.703092	KQ087368:138458-140429|KQ087360:1899458-1907109|KQ087367:532772-534988	http://amigo.geneontology.org/cgi-bin/amigo/term_details?term=GO:0030428
negative regulation of meiotic cell cycle	Gene Ontology	GO:0051447	2	25	0.141027	0.703092	KQ087362:862662-866724|KQ087363:1961113-1963312	http://amigo.geneontology.org/cgi-bin/amigo/term_details?term=GO:0051447
oxidoreductase activity, acting on paired donors, with incorporation or reduction of molecular oxygen	Gene Ontology	GO:0016705	5	108	0.14421	0.703092	KQ087359:2283519-2284864|KQ087369:690204-691637|KQ087362:862662-866724|KQ087364:1203653-1205335|KQ087365:2369227-2370352	http://amigo.geneontology.org/cgi-bin/amigo/term_details?term=GO:0016705
macromolecule catabolic process	Gene Ontology	GO:0009057	9	235	0.145624	0.703092	KQ087367:356152-357382|KQ087363:1007886-1012571|KQ087376:56623-57856|KQ087365:449005-449578|KQ087358:1526267-1527664|KQ087364:910390-912706|KQ087358:2139490-2144714|KQ087365:447988-448935|KQ087362:2998114-2999250	http://amigo.geneontology.org/cgi-bin/amigo/term_details?term=GO:0009057
organic heteropentacyclic compound metabolic process	Gene Ontology	GO:1901376	3	51	0.145955	0.703092	KQ087367:1849073-1850422|KQ087362:862662-866724|KQ087365:2372967-2378471	http://amigo.geneontology.org/cgi-bin/amigo/term_details?term=GO:1901376
organic heteropentacyclic compound biosynthetic process	Gene Ontology	GO:1901378	3	51	0.145955	0.703092	KQ087367:1849073-1850422|KQ087362:862662-866724|KQ087365:2372967-2378471	http://amigo.geneontology.org/cgi-bin/amigo/term_details?term=GO:1901378
oxidoreductase activity, acting on peroxide as acceptor	Gene Ontology	GO:0016684	2	27	0.158154	0.703092	KQ087360:34988-36578|KQ087362:862662-866724	http://amigo.geneontology.org/cgi-bin/amigo/term_details?term=GO:0016684
regulation of cell wall macromolecule metabolic process	Gene Ontology	GO:0010981	1	6	0.159525	0.703092	KQ087367:532772-534988	http://amigo.geneontology.org/cgi-bin/amigo/term_details?term=GO:0010981
neutral amino acid transmembrane transporter activity	Gene Ontology	GO:0015175	1	6	0.159525	0.703092	KQ087375:930620-932510	http://amigo.geneontology.org/cgi-bin/amigo/term_details?term=GO:0015175
alpha-L-arabinofuranosidase activity	Gene Ontology	GO:0046556	1	6	0.159525	0.703092	KQ087364:910390-912706	http://amigo.geneontology.org/cgi-bin/amigo/term_details?term=GO:0046556
L-amino acid import	Gene Ontology	GO:0043092	1	6	0.159525	0.703092	KQ087365:2369227-2370352	http://amigo.geneontology.org/cgi-bin/amigo/term_details?term=GO:0043092
glycosphingolipid metabolic process	Gene Ontology	GO:0006687	1	6	0.159525	0.703092	KQ087373:200757-201957	http://amigo.geneontology.org/cgi-bin/amigo/term_details?term=GO:0006687
xylanase activity	Gene Ontology	GO:0097599	1	6	0.159525	0.703092	KQ087364:910390-912706	http://amigo.geneontology.org/cgi-bin/amigo/term_details?term=GO:0097599
regulation of fungal-type cell wall biogenesis	Gene Ontology	GO:0032995	1	6	0.159525	0.703092	KQ087367:532772-534988	http://amigo.geneontology.org/cgi-bin/amigo/term_details?term=GO:0032995
acetyl-CoA biosynthetic process	Gene Ontology	GO:0006085	1	6	0.159525	0.703092	KQ087362:2285060-2286293	http://amigo.geneontology.org/cgi-bin/amigo/term_details?term=GO:0006085
carbon catabolite activation of transcription	Gene Ontology	GO:0045991	1	6	0.159525	0.703092	KQ087370:266103-267749	http://amigo.geneontology.org/cgi-bin/amigo/term_details?term=GO:0045991
modified amino acid transmembrane transporter activity	Gene Ontology	GO:0072349	1	6	0.159525	0.703092	KQ087358:1380165-1382271	http://amigo.geneontology.org/cgi-bin/amigo/term_details?term=GO:0072349
biological phase	Gene Ontology	GO:0044848	1	6	0.159525	0.703092	KQ087362:1491668-1493040	http://amigo.geneontology.org/cgi-bin/amigo/term_details?term=GO:0044848
regulation of endocytosis	Gene Ontology	GO:0030100	1	6	0.159525	0.703092	KQ087363:3265873-3267451	http://amigo.geneontology.org/cgi-bin/amigo/term_details?term=GO:0030100
ribonucleoside bisphosphate metabolic process	Gene Ontology	GO:0033875	1	6	0.159525	0.703092	KQ087362:2285060-2286293	http://amigo.geneontology.org/cgi-bin/amigo/term_details?term=GO:0033875
glucanosyltransferase activity	Gene Ontology	GO:0042123	1	6	0.159525	0.703092	KQ087358:1775025-1776704	http://amigo.geneontology.org/cgi-bin/amigo/term_details?term=GO:0042123
purine nucleoside bisphosphate metabolic process	Gene Ontology	GO:0034032	1	6	0.159525	0.703092	KQ087362:2285060-2286293	http://amigo.geneontology.org/cgi-bin/amigo/term_details?term=GO:0034032
fungal-type cell wall beta-glucan biosynthetic process	Gene Ontology	GO:0070880	1	6	0.159525	0.703092	KQ087367:532772-534988	http://amigo.geneontology.org/cgi-bin/amigo/term_details?term=GO:0070880
regulation of protein binding	Gene Ontology	GO:0043393	1	6	0.159525	0.703092	KQ087363:537092-537675	http://amigo.geneontology.org/cgi-bin/amigo/term_details?term=GO:0043393
inorganic phosphate transmembrane transporter activity	Gene Ontology	GO:0005315	1	6	0.159525	0.703092	KQ087365:1642849-1644666	http://amigo.geneontology.org/cgi-bin/amigo/term_details?term=GO:0005315
thioester biosynthetic process	Gene Ontology	GO:0035384	1	6	0.159525	0.703092	KQ087362:2285060-2286293	http://amigo.geneontology.org/cgi-bin/amigo/term_details?term=GO:0035384
L-arginine transport	Gene Ontology	GO:1902023	1	6	0.159525	0.703092	KQ087365:2369227-2370352	http://amigo.geneontology.org/cgi-bin/amigo/term_details?term=GO:1902023
fungal-type cell wall beta-glucan metabolic process	Gene Ontology	GO:0070879	1	6	0.159525	0.703092	KQ087367:532772-534988	http://amigo.geneontology.org/cgi-bin/amigo/term_details?term=GO:0070879
threonine catabolic process	Gene Ontology	GO:0006567	1	6	0.159525	0.703092	KQ087370:266103-267749	http://amigo.geneontology.org/cgi-bin/amigo/term_details?term=GO:0006567
1,3-beta-glucanosyltransferase activity	Gene Ontology	GO:0042124	1	6	0.159525	0.703092	KQ087358:1775025-1776704	http://amigo.geneontology.org/cgi-bin/amigo/term_details?term=GO:0042124
acyl-CoA biosynthetic process	Gene Ontology	GO:0071616	1	6	0.159525	0.703092	KQ087362:2285060-2286293	http://amigo.geneontology.org/cgi-bin/amigo/term_details?term=GO:0071616
nucleoside bisphosphate metabolic process	Gene Ontology	GO:0033865	1	6	0.159525	0.703092	KQ087362:2285060-2286293	http://amigo.geneontology.org/cgi-bin/amigo/term_details?term=GO:0033865
transferase activity, transferring acyl groups other than amino-acyl groups	Gene Ontology	GO:0016747	6	144	0.162831	0.712137	KQ087365:621086-622320|KQ087363:2161676-2163275|KQ087360:37254-39213|KQ087362:2915437-2921767|KQ087358:2205989-2207522|KQ087362:2924274-2929987	http://amigo.geneontology.org/cgi-bin/amigo/term_details?term=GO:0016747
asexual sporulation resulting in formation of a cellular spore	Gene Ontology	GO:0043936	3	54	0.163572	0.712137	KQ087375:289977-291200|KQ087362:862662-866724|KQ087369:690204-691637	http://amigo.geneontology.org/cgi-bin/amigo/term_details?term=GO:0043936
acetyltransferase activity	Gene Ontology	GO:0016407	3	54	0.163572	0.712137	KQ087360:37254-39213|KQ087362:2915437-2921767|KQ087363:2161676-2163275	http://amigo.geneontology.org/cgi-bin/amigo/term_details?term=GO:0016407
quinone biosynthetic process	Gene Ontology	GO:1901663	2	28	0.166858	0.7235	KQ087365:2372967-2378471|KQ087365:2369227-2370352	http://amigo.geneontology.org/cgi-bin/amigo/term_details?term=GO:1901663
regulation of sporulation	Gene Ontology	GO:0043937	3	55	0.169581	0.732343	KQ087366:1113367-1114312|KQ087375:289977-291200|KQ087362:862662-866724	http://amigo.geneontology.org/cgi-bin/amigo/term_details?term=GO:0043937
quinone metabolic process	Gene Ontology	GO:1901661	2	29	0.175642	0.736386	KQ087365:2372967-2378471|KQ087365:2369227-2370352	http://amigo.geneontology.org/cgi-bin/amigo/term_details?term=GO:1901661
membrane lipid biosynthetic process	Gene Ontology	GO:0046467	2	29	0.175642	0.736386	KQ087362:1491668-1493040|KQ087373:200757-201957	http://amigo.geneontology.org/cgi-bin/amigo/term_details?term=GO:0046467
synapsis	Gene Ontology	GO:0007129	1	7	0.180143	0.736386	KQ087363:1961113-1963312	http://amigo.geneontology.org/cgi-bin/amigo/term_details?term=GO:0007129
aspartate family amino acid catabolic process	Gene Ontology	GO:0009068	1	7	0.180143	0.736386	KQ087370:266103-267749	http://amigo.geneontology.org/cgi-bin/amigo/term_details?term=GO:0009068
negative regulation of transport	Gene Ontology	GO:0051051	1	7	0.180143	0.736386	KQ087365:2369227-2370352	http://amigo.geneontology.org/cgi-bin/amigo/term_details?term=GO:0051051
protein exit from endoplasmic reticulum	Gene Ontology	GO:0032527	1	7	0.180143	0.736386	KQ087362:1196774-1198078	http://amigo.geneontology.org/cgi-bin/amigo/term_details?term=GO:0032527
cytoplasmic mRNA processing body	Gene Ontology	GO:0000932	1	7	0.180143	0.736386	KQ087363:3198271-3200281	http://amigo.geneontology.org/cgi-bin/amigo/term_details?term=GO:0000932
IgE binding	Gene Ontology	GO:0019863	1	7	0.180143	0.736386	KQ087363:537092-537675	http://amigo.geneontology.org/cgi-bin/amigo/term_details?term=GO:0019863
chlamydospore formation	Gene Ontology	GO:0001410	1	7	0.180143	0.736386	KQ087369:690204-691637	http://amigo.geneontology.org/cgi-bin/amigo/term_details?term=GO:0001410
immunoglobulin binding	Gene Ontology	GO:0019865	1	7	0.180143	0.736386	KQ087363:537092-537675	http://amigo.geneontology.org/cgi-bin/amigo/term_details?term=GO:0019865
cell-abiotic substrate adhesion	Gene Ontology	GO:0036164	1	7	0.180143	0.736386	KQ087361:507788-509687	http://amigo.geneontology.org/cgi-bin/amigo/term_details?term=GO:0036164
adenine metabolic process	Gene Ontology	GO:0046083	1	7	0.180143	0.736386	KQ087375:490863-493383	http://amigo.geneontology.org/cgi-bin/amigo/term_details?term=GO:0046083
polyamine biosynthetic process	Gene Ontology	GO:0006596	1	7	0.180143	0.736386	KQ087367:372911-374048	http://amigo.geneontology.org/cgi-bin/amigo/term_details?term=GO:0006596
polyamine metabolic process	Gene Ontology	GO:0006595	1	7	0.180143	0.736386	KQ087367:372911-374048	http://amigo.geneontology.org/cgi-bin/amigo/term_details?term=GO:0006595
carboxylic acid transport	Gene Ontology	GO:0046942	2	30	0.184498	0.748474	KQ087369:587487-589168|KQ087375:930620-932510	http://amigo.geneontology.org/cgi-bin/amigo/term_details?term=GO:0046942
cell wall biogenesis	Gene Ontology	GO:0042546	3	58	0.187973	0.757863	KQ087360:1899458-1907109|KQ087367:532772-534988|KQ087374:264300-264824	http://amigo.geneontology.org/cgi-bin/amigo/term_details?term=GO:0042546
cell septum assembly	Gene Ontology	GO:0090529	2	31	0.193416	0.757863	KQ087360:1899458-1907109|KQ087367:532772-534988	http://amigo.geneontology.org/cgi-bin/amigo/term_details?term=GO:0090529
ketone biosynthetic process	Gene Ontology	GO:0042181	3	59	0.194216	0.757863	KQ087367:1849073-1850422|KQ087365:2372967-2378471|KQ087365:2369227-2370352	http://amigo.geneontology.org/cgi-bin/amigo/term_details?term=GO:0042181
phosphotransferase activity, for other substituted phosphate groups	Gene Ontology	GO:0016780	1	8	0.200257	0.757863	KQ087362:2924274-2929987	http://amigo.geneontology.org/cgi-bin/amigo/term_details?term=GO:0016780
pantothenate metabolic process	Gene Ontology	GO:0015939	1	8	0.200257	0.757863	KQ087362:2285060-2286293	http://amigo.geneontology.org/cgi-bin/amigo/term_details?term=GO:0015939
regulation of beta-glucan metabolic process	Gene Ontology	GO:0032950	1	8	0.200257	0.757863	KQ087367:532772-534988	http://amigo.geneontology.org/cgi-bin/amigo/term_details?term=GO:0032950
homoserine metabolic process	Gene Ontology	GO:0009092	1	8	0.200257	0.757863	KQ087375:490863-493383	http://amigo.geneontology.org/cgi-bin/amigo/term_details?term=GO:0009092
L-serine metabolic process	Gene Ontology	GO:0006563	1	8	0.200257	0.757863	KQ087363:1088182-1089795	http://amigo.geneontology.org/cgi-bin/amigo/term_details?term=GO:0006563
adenylyltransferase activity	Gene Ontology	GO:0070566	1	8	0.200257	0.757863	KQ087362:2481880-2484141	http://amigo.geneontology.org/cgi-bin/amigo/term_details?term=GO:0070566
negative regulation of asexual sporulation resulting in formation of a cellular spore	Gene Ontology	GO:0043944	1	8	0.200257	0.757863	KQ087362:862662-866724	http://amigo.geneontology.org/cgi-bin/amigo/term_details?term=GO:0043944
oxidoreductase activity, acting on the CH-CH group of donors, NAD or NADP as acceptor	Gene Ontology	GO:0016628	1	8	0.200257	0.757863	KQ087362:2915437-2921767	http://amigo.geneontology.org/cgi-bin/amigo/term_details?term=GO:0016628
negative regulation of meiotic nuclear division	Gene Ontology	GO:0045835	1	8	0.200257	0.757863	KQ087363:1961113-1963312	http://amigo.geneontology.org/cgi-bin/amigo/term_details?term=GO:0045835
phosphate ion transport	Gene Ontology	GO:0006817	1	8	0.200257	0.757863	KQ087365:1642849-1644666	http://amigo.geneontology.org/cgi-bin/amigo/term_details?term=GO:0006817
transferase activity, transferring acyl groups, acyl groups converted into alkyl on transfer	Gene Ontology	GO:0046912	1	8	0.200257	0.757863	KQ087360:750478-752036	http://amigo.geneontology.org/cgi-bin/amigo/term_details?term=GO:0046912
dicarboxylic acid transport	Gene Ontology	GO:0006835	1	8	0.200257	0.757863	KQ087369:587487-589168	http://amigo.geneontology.org/cgi-bin/amigo/term_details?term=GO:0006835
dicarboxylic acid transmembrane transporter activity	Gene Ontology	GO:0005310	1	8	0.200257	0.757863	KQ087369:587487-589168	http://amigo.geneontology.org/cgi-bin/amigo/term_details?term=GO:0005310
galactosidase activity	Gene Ontology	GO:0015925	1	8	0.200257	0.757863	KQ087363:118552-120324	http://amigo.geneontology.org/cgi-bin/amigo/term_details?term=GO:0015925
cell wall chitin biosynthetic process	Gene Ontology	GO:0006038	1	8	0.200257	0.757863	KQ087367:532772-534988	http://amigo.geneontology.org/cgi-bin/amigo/term_details?term=GO:0006038
carbohydrate derivative catabolic process	Gene Ontology	GO:1901136	2	32	0.202389	0.757897	KQ087363:1007886-1012571|KQ087358:2139490-2144714	http://amigo.geneontology.org/cgi-bin/amigo/term_details?term=GO:1901136
organic anion transport	Gene Ontology	GO:0015711	2	32	0.202389	0.757897	KQ087369:587487-589168|KQ087375:930620-932510	http://amigo.geneontology.org/cgi-bin/amigo/term_details?term=GO:0015711
mating projection tip	Gene Ontology	GO:0043332	2	32	0.202389	0.757897	KQ087365:449005-449578|KQ087365:447988-448935	http://amigo.geneontology.org/cgi-bin/amigo/term_details?term=GO:0043332
toxin metabolic process	Gene Ontology	GO:0009404	3	61	0.206851	0.764581	KQ087360:37254-39213|KQ087365:2372967-2378471|KQ087362:862662-866724	http://amigo.geneontology.org/cgi-bin/amigo/term_details?term=GO:0009404
cell division	Gene Ontology	GO:0051301	4	92	0.209214	0.764581	KQ087360:1899458-1907109|KQ087365:447988-448935|KQ087365:449005-449578|KQ087367:532772-534988	http://amigo.geneontology.org/cgi-bin/amigo/term_details?term=GO:0051301
hyphal cell wall	Gene Ontology	GO:0030446	2	33	0.211408	0.764581	KQ087375:490863-493383|KQ087363:1088182-1089795	http://amigo.geneontology.org/cgi-bin/amigo/term_details?term=GO:0030446
glucosamine-containing compound biosynthetic process	Gene Ontology	GO:1901073	1	9	0.21988	0.764581	KQ087367:532772-534988	http://amigo.geneontology.org/cgi-bin/amigo/term_details?term=GO:1901073
threonine metabolic process	Gene Ontology	GO:0006566	1	9	0.21988	0.764581	KQ087370:266103-267749	http://amigo.geneontology.org/cgi-bin/amigo/term_details?term=GO:0006566
chitin biosynthetic process	Gene Ontology	GO:0006031	1	9	0.21988	0.764581	KQ087367:532772-534988	http://amigo.geneontology.org/cgi-bin/amigo/term_details?term=GO:0006031
cell wall beta-glucan metabolic process	Gene Ontology	GO:0034406	1	9	0.21988	0.764581	KQ087367:532772-534988	http://amigo.geneontology.org/cgi-bin/amigo/term_details?term=GO:0034406
branched-chain amino acid metabolic process	Gene Ontology	GO:0009081	1	9	0.21988	0.764581	KQ087367:7114-8303	http://amigo.geneontology.org/cgi-bin/amigo/term_details?term=GO:0009081
clathrin-coated vesicle	Gene Ontology	GO:0030136	1	9	0.21988	0.764581	KQ087363:3265873-3267451	http://amigo.geneontology.org/cgi-bin/amigo/term_details?term=GO:0030136
regulation of meiosis I	Gene Ontology	GO:0060631	1	9	0.21988	0.764581	KQ087363:1961113-1963312	http://amigo.geneontology.org/cgi-bin/amigo/term_details?term=GO:0060631
DNA alkylation	Gene Ontology	GO:0006305	1	9	0.21988	0.764581	KQ087375:490863-493383	http://amigo.geneontology.org/cgi-bin/amigo/term_details?term=GO:0006305
aminoglycan biosynthetic process	Gene Ontology	GO:0006023	1	9	0.21988	0.764581	KQ087367:532772-534988	http://amigo.geneontology.org/cgi-bin/amigo/term_details?term=GO:0006023
polyol catabolic process	Gene Ontology	GO:0046174	1	9	0.21988	0.764581	KQ087360:2194518-2195525	http://amigo.geneontology.org/cgi-bin/amigo/term_details?term=GO:0046174
regulation of glucan biosynthetic process	Gene Ontology	GO:0010962	1	9	0.21988	0.764581	KQ087367:532772-534988	http://amigo.geneontology.org/cgi-bin/amigo/term_details?term=GO:0010962
regulation of polysaccharide biosynthetic process	Gene Ontology	GO:0032885	1	9	0.21988	0.764581	KQ087367:532772-534988	http://amigo.geneontology.org/cgi-bin/amigo/term_details?term=GO:0032885
DNA methylation	Gene Ontology	GO:0006306	1	9	0.21988	0.764581	KQ087375:490863-493383	http://amigo.geneontology.org/cgi-bin/amigo/term_details?term=GO:0006306
tricarboxylic acid cycle	Gene Ontology	GO:0006099	1	9	0.21988	0.764581	KQ087358:1286557-1288080	http://amigo.geneontology.org/cgi-bin/amigo/term_details?term=GO:0006099
hydrolase activity, acting on carbon-nitrogen (but not peptide) bonds, in linear amidines	Gene Ontology	GO:0016813	1	9	0.21988	0.764581	KQ087367:372911-374048	http://amigo.geneontology.org/cgi-bin/amigo/term_details?term=GO:0016813
DNA methylation or demethylation	Gene Ontology	GO:0044728	1	9	0.21988	0.764581	KQ087375:490863-493383	http://amigo.geneontology.org/cgi-bin/amigo/term_details?term=GO:0044728
septin ring	Gene Ontology	GO:0005940	1	9	0.21988	0.764581	KQ087367:532772-534988	http://amigo.geneontology.org/cgi-bin/amigo/term_details?term=GO:0005940
fungal-type vacuole membrane	Gene Ontology	GO:0000329	4	95	0.22475	0.773978	KQ087360:2567613-2574708|KQ087365:308012-309649|KQ087373:200757-201957|KQ087371:410140-412175	http://amigo.geneontology.org/cgi-bin/amigo/term_details?term=GO:0000329
lytic vacuole membrane	Gene Ontology	GO:0098852	4	95	0.22475	0.773978	KQ087360:2567613-2574708|KQ087365:308012-309649|KQ087373:200757-201957|KQ087371:410140-412175	http://amigo.geneontology.org/cgi-bin/amigo/term_details?term=GO:0098852
site of polarized growth	Gene Ontology	GO:0030427	4	95	0.22475	0.773978	KQ087360:1899458-1907109|KQ087365:447988-448935|KQ087365:449005-449578|KQ087367:532772-534988	http://amigo.geneontology.org/cgi-bin/amigo/term_details?term=GO:0030427
antioxidant activity	Gene Ontology	GO:0016209	2	35	0.229555	0.782974	KQ087360:34988-36578|KQ087362:862662-866724	http://amigo.geneontology.org/cgi-bin/amigo/term_details?term=GO:0016209
cell projection part	Gene Ontology	GO:0044463	2	35	0.229555	0.782974	KQ087365:449005-449578|KQ087365:447988-448935	http://amigo.geneontology.org/cgi-bin/amigo/term_details?term=GO:0044463
response to pH	Gene Ontology	GO:0009268	2	35	0.229555	0.782974	KQ087369:690204-691637|KQ087362:2924274-2929987	http://amigo.geneontology.org/cgi-bin/amigo/term_details?term=GO:0009268
mating projection	Gene Ontology	GO:0005937	2	36	0.238669	0.787672	KQ087365:449005-449578|KQ087365:447988-448935	http://amigo.geneontology.org/cgi-bin/amigo/term_details?term=GO:0005937
cell projection	Gene Ontology	GO:0042995	2	36	0.238669	0.787672	KQ087365:449005-449578|KQ087365:447988-448935	http://amigo.geneontology.org/cgi-bin/amigo/term_details?term=GO:0042995
purine nucleobase biosynthetic process	Gene Ontology	GO:0009113	1	10	0.239023	0.787672	KQ087375:490863-493383	http://amigo.geneontology.org/cgi-bin/amigo/term_details?term=GO:0009113
negative regulation of translation	Gene Ontology	GO:0017148	1	10	0.239023	0.787672	KQ087363:537092-537675	http://amigo.geneontology.org/cgi-bin/amigo/term_details?term=GO:0017148
DNA modification	Gene Ontology	GO:0006304	1	10	0.239023	0.787672	KQ087375:490863-493383	http://amigo.geneontology.org/cgi-bin/amigo/term_details?term=GO:0006304
o-orsellinic acid metabolic process	Gene Ontology	GO:1900582	1	10	0.239023	0.787672	KQ087365:2372967-2378471	http://amigo.geneontology.org/cgi-bin/amigo/term_details?term=GO:1900582
solute:proton symporter activity	Gene Ontology	GO:0015295	1	10	0.239023	0.787672	KQ087365:1642849-1644666	http://amigo.geneontology.org/cgi-bin/amigo/term_details?term=GO:0015295
cell wall chitin metabolic process	Gene Ontology	GO:0006037	1	10	0.239023	0.787672	KQ087367:532772-534988	http://amigo.geneontology.org/cgi-bin/amigo/term_details?term=GO:0006037
oxidoreductase activity, acting on paired donors, with incorporation or reduction of molecular oxygen, NAD(P)H as one donor, and incorporation of one atom of oxygen	Gene Ontology	GO:0016709	1	10	0.239023	0.787672	KQ087364:1203653-1205335	http://amigo.geneontology.org/cgi-bin/amigo/term_details?term=GO:0016709
o-orsellinic acid biosynthetic process	Gene Ontology	GO:1900584	1	10	0.239023	0.787672	KQ087365:2372967-2378471	http://amigo.geneontology.org/cgi-bin/amigo/term_details?term=GO:1900584
mitotic cytokinetic process	Gene Ontology	GO:1902410	2	37	0.247801	0.809131	KQ087360:1899458-1907109|KQ087367:532772-534988	http://amigo.geneontology.org/cgi-bin/amigo/term_details?term=GO:1902410
membrane lipid metabolic process	Gene Ontology	GO:0006643	2	37	0.247801	0.809131	KQ087362:1491668-1493040|KQ087373:200757-201957	http://amigo.geneontology.org/cgi-bin/amigo/term_details?term=GO:0006643
NAD binding	Gene Ontology	GO:0051287	2	37	0.247801	0.809131	KQ087360:2667102-2669282|KQ087373:131465-132914	http://amigo.geneontology.org/cgi-bin/amigo/term_details?term=GO:0051287
amino sugar biosynthetic process	Gene Ontology	GO:0046349	1	11	0.257698	0.814297	KQ087367:532772-534988	http://amigo.geneontology.org/cgi-bin/amigo/term_details?term=GO:0046349
amino acid transmembrane transport	Gene Ontology	GO:0003333	1	11	0.257698	0.814297	KQ087358:1380165-1382271	http://amigo.geneontology.org/cgi-bin/amigo/term_details?term=GO:0003333
TOR signaling	Gene Ontology	GO:0031929	1	11	0.257698	0.814297	KQ087365:2369227-2370352	http://amigo.geneontology.org/cgi-bin/amigo/term_details?term=GO:0031929
aspartic-type peptidase activity	Gene Ontology	GO:0070001	1	11	0.257698	0.814297	KQ087364:634810-635620	http://amigo.geneontology.org/cgi-bin/amigo/term_details?term=GO:0070001
cellular biogenic amine biosynthetic process	Gene Ontology	GO:0042401	1	11	0.257698	0.814297	KQ087367:372911-374048	http://amigo.geneontology.org/cgi-bin/amigo/term_details?term=GO:0042401
aspartic-type endopeptidase activity	Gene Ontology	GO:0004190	1	11	0.257698	0.814297	KQ087364:634810-635620	http://amigo.geneontology.org/cgi-bin/amigo/term_details?term=GO:0004190
amine biosynthetic process	Gene Ontology	GO:0009309	1	11	0.257698	0.814297	KQ087367:372911-374048	http://amigo.geneontology.org/cgi-bin/amigo/term_details?term=GO:0009309
positive regulation of sexual sporulation resulting in formation of a cellular spore	Gene Ontology	GO:0043941	1	11	0.257698	0.814297	KQ087362:862662-866724	http://amigo.geneontology.org/cgi-bin/amigo/term_details?term=GO:0043941
cofactor binding	Gene Ontology	GO:0048037	9	274	0.258981	0.814297	KQ087367:1671961-1673346|KQ087360:2667102-2669282|KQ087375:436511-438273|KQ087360:124196-127151|KQ087360:712599-714563|KQ087359:427923-429827|KQ087373:131465-132914|KQ087363:1088182-1089795|KQ087364:1203653-1205335	http://amigo.geneontology.org/cgi-bin/amigo/term_details?term=GO:0048037
cellular metabolic process	Gene Ontology	GO:0044237	60	2202	0.262669	0.814297	KQ087360:1899458-1907109|KQ087363:1007886-1012571|KQ087367:1525784-1528662|KQ087366:601329-603986|KQ087376:94291-96718|KQ087363:1004790-1007418|KQ087367:532772-534988|KQ087363:537092-537675|KQ087360:2667102-2669282|KQ087358:1651081-1654414|KQ087360:750478-752036|KQ087363:3265873-3267451|KQ087371:585381-586918|KQ087375:490863-493383|KQ087362:2924274-2929987|KQ087363:2161676-2163275|KQ087365:237296…	http://amigo.geneontology.org/cgi-bin/amigo/term_details?term=GO:0044237
oxidoreductase activity, acting on the aldehyde or oxo group of donors, NAD or NADP as acceptor	Gene Ontology	GO:0016620	2	39	0.266093	0.814297	KQ087373:131465-132914|KQ087370:266103-267749	http://amigo.geneontology.org/cgi-bin/amigo/term_details?term=GO:0016620
plasma membrane part	Gene Ontology	GO:0044459	2	39	0.266093	0.814297	KQ087365:1642849-1644666|KQ087367:532772-534988	http://amigo.geneontology.org/cgi-bin/amigo/term_details?term=GO:0044459
negative regulation of reproductive process	Gene Ontology	GO:2000242	2	40	0.275242	0.814297	KQ087362:862662-866724|KQ087363:1961113-1963312	http://amigo.geneontology.org/cgi-bin/amigo/term_details?term=GO:2000242
dioxygenase activity	Gene Ontology	GO:0051213	2	40	0.275242	0.814297	KQ087362:862662-866724|KQ087365:2369227-2370352	http://amigo.geneontology.org/cgi-bin/amigo/term_details?term=GO:0051213
negative regulation of sexual sporulation resulting in formation of a cellular spore	Gene Ontology	GO:0043942	1	12	0.275917	0.814297	KQ087362:862662-866724	http://amigo.geneontology.org/cgi-bin/amigo/term_details?term=GO:0043942
positive regulation by organism of defense response of other organism involved in symbiotic interaction	Gene Ontology	GO:0052510	1	12	0.275917	0.814297	KQ087375:490863-493383	http://amigo.geneontology.org/cgi-bin/amigo/term_details?term=GO:0052510
polysome	Gene Ontology	GO:0005844	1	12	0.275917	0.814297	KQ087363:3198271-3200281	http://amigo.geneontology.org/cgi-bin/amigo/term_details?term=GO:0005844
endoplasmic reticulum organization	Gene Ontology	GO:0007029	1	12	0.275917	0.814297	KQ087359:909366-911888	http://amigo.geneontology.org/cgi-bin/amigo/term_details?term=GO:0007029
induction by organism of defense response of other organism involved in symbiotic interaction	Gene Ontology	GO:0052251	1	12	0.275917	0.814297	KQ087375:490863-493383	http://amigo.geneontology.org/cgi-bin/amigo/term_details?term=GO:0052251
acetate metabolic process	Gene Ontology	GO:0006083	1	12	0.275917	0.814297	KQ087370:266103-267749	http://amigo.geneontology.org/cgi-bin/amigo/term_details?term=GO:0006083
positive regulation of defense response	Gene Ontology	GO:0031349	1	12	0.275917	0.814297	KQ087375:490863-493383	http://amigo.geneontology.org/cgi-bin/amigo/term_details?term=GO:0031349
positive regulation by symbiont of host defense response	Gene Ontology	GO:0052509	1	12	0.275917	0.814297	KQ087375:490863-493383	http://amigo.geneontology.org/cgi-bin/amigo/term_details?term=GO:0052509
homologous chromosome segregation	Gene Ontology	GO:0045143	1	12	0.275917	0.814297	KQ087363:1961113-1963312	http://amigo.geneontology.org/cgi-bin/amigo/term_details?term=GO:0045143
induction by symbiont of host defense response	Gene Ontology	GO:0044416	1	12	0.275917	0.814297	KQ087375:490863-493383	http://amigo.geneontology.org/cgi-bin/amigo/term_details?term=GO:0044416
regulation of carbohydrate biosynthetic process	Gene Ontology	GO:0043255	1	12	0.275917	0.814297	KQ087367:532772-534988	http://amigo.geneontology.org/cgi-bin/amigo/term_details?term=GO:0043255
regulation of binding	Gene Ontology	GO:0051098	1	12	0.275917	0.814297	KQ087363:537092-537675	http://amigo.geneontology.org/cgi-bin/amigo/term_details?term=GO:0051098
binding	Gene Ontology	GO:0005488	58	2140	0.282524	0.814297	KQ087360:1899458-1907109|KQ087363:1007886-1012571|KQ087365:801826-807624|KQ087376:94291-96718|KQ087363:1004790-1007418|KQ087362:1196774-1198078|KQ087358:1651081-1654414|KQ087360:712599-714563|KQ087361:497876-498573|KQ087363:3265873-3267451|KQ087359:427923-429827|KQ087371:585381-586918|KQ087375:490863-493383|KQ087362:2924274-2929987|KQ087365:2372967-2378471|KQ087366:1113367-1114312|KQ087358:128655…	http://amigo.geneontology.org/cgi-bin/amigo/term_details?term=GO:0005488
vacuolar membrane	Gene Ontology	GO:0005774	4	106	0.283879	0.814297	KQ087360:2567613-2574708|KQ087365:308012-309649|KQ087373:200757-201957|KQ087371:410140-412175	http://amigo.geneontology.org/cgi-bin/amigo/term_details?term=GO:0005774
regulation of transport	Gene Ontology	GO:0051049	2	41	0.284385	0.814297	KQ087363:3265873-3267451|KQ087365:2369227-2370352	http://amigo.geneontology.org/cgi-bin/amigo/term_details?term=GO:0051049
calcium ion binding	Gene Ontology	GO:0005509	2	41	0.284385	0.814297	KQ087367:314348-315743|KQ087360:1177609-1179024	http://amigo.geneontology.org/cgi-bin/amigo/term_details?term=GO:0005509
heme binding	Gene Ontology	GO:0020037	4	107	0.28938	0.814297	KQ087359:2283519-2284864|KQ087360:34988-36578|KQ087369:690204-691637|KQ087362:862662-866724	http://amigo.geneontology.org/cgi-bin/amigo/term_details?term=GO:0020037
tetrapyrrole binding	Gene Ontology	GO:0046906	4	107	0.28938	0.814297	KQ087359:2283519-2284864|KQ087360:34988-36578|KQ087369:690204-691637|KQ087362:862662-866724	http://amigo.geneontology.org/cgi-bin/amigo/term_details?term=GO:0046906
polysaccharide biosynthetic process	Gene Ontology	GO:0000271	2	42	0.293517	0.814297	KQ087360:1899458-1907109|KQ087367:532772-534988	http://amigo.geneontology.org/cgi-bin/amigo/term_details?term=GO:0000271
regulation of sporulation resulting in formation of a cellular spore	Gene Ontology	GO:0042173	2	42	0.293517	0.814297	KQ087375:289977-291200|KQ087362:862662-866724	http://amigo.geneontology.org/cgi-bin/amigo/term_details?term=GO:0042173
cellular polysaccharide biosynthetic process	Gene Ontology	GO:0033692	2	42	0.293517	0.814297	KQ087360:1899458-1907109|KQ087367:532772-534988	http://amigo.geneontology.org/cgi-bin/amigo/term_details?term=GO:0033692
integral component of plasma membrane	Gene Ontology	GO:0005887	1	13	0.29369	0.814297	KQ087365:1642849-1644666	http://amigo.geneontology.org/cgi-bin/amigo/term_details?term=GO:0005887
chromosome organization involved in meiotic cell cycle	Gene Ontology	GO:0070192	1	13	0.29369	0.814297	KQ087363:1961113-1963312	http://amigo.geneontology.org/cgi-bin/amigo/term_details?term=GO:0070192
xanthone-containing compound biosynthetic process	Gene Ontology	GO:2001307	1	13	0.29369	0.814297	KQ087367:1849073-1850422	http://amigo.geneontology.org/cgi-bin/amigo/term_details?term=GO:2001307
septin cytoskeleton	Gene Ontology	GO:0032156	1	13	0.29369	0.814297	KQ087367:532772-534988	http://amigo.geneontology.org/cgi-bin/amigo/term_details?term=GO:0032156
negative regulation of cellular amide metabolic process	Gene Ontology	GO:0034249	1	13	0.29369	0.814297	KQ087363:537092-537675	http://amigo.geneontology.org/cgi-bin/amigo/term_details?term=GO:0034249
plasma membrane protein complex	Gene Ontology	GO:0098797	1	13	0.29369	0.814297	KQ087367:532772-534988	http://amigo.geneontology.org/cgi-bin/amigo/term_details?term=GO:0098797
NADP metabolic process	Gene Ontology	GO:0006739	1	13	0.29369	0.814297	KQ087370:266103-267749	http://amigo.geneontology.org/cgi-bin/amigo/term_details?term=GO:0006739
asperthecin biosynthetic process	Gene Ontology	GO:0036184	1	13	0.29369	0.814297	KQ087365:2372967-2378471	http://amigo.geneontology.org/cgi-bin/amigo/term_details?term=GO:0036184
beta-glucan biosynthetic process	Gene Ontology	GO:0051274	1	13	0.29369	0.814297	KQ087367:532772-534988	http://amigo.geneontology.org/cgi-bin/amigo/term_details?term=GO:0051274
alcohol catabolic process	Gene Ontology	GO:0046164	1	13	0.29369	0.814297	KQ087360:2194518-2195525	http://amigo.geneontology.org/cgi-bin/amigo/term_details?term=GO:0046164
trans-Golgi network	Gene Ontology	GO:0005802	1	13	0.29369	0.814297	KQ087373:200757-201957	http://amigo.geneontology.org/cgi-bin/amigo/term_details?term=GO:0005802
triglyceride lipase activity	Gene Ontology	GO:0004806	1	13	0.29369	0.814297	KQ087373:742427-746105	http://amigo.geneontology.org/cgi-bin/amigo/term_details?term=GO:0004806
growing cell tip	Gene Ontology	GO:0035838	1	13	0.29369	0.814297	KQ087360:1899458-1907109	http://amigo.geneontology.org/cgi-bin/amigo/term_details?term=GO:0035838
oxidoreductase activity, acting on the CH-OH group of donors, NAD or NADP as acceptor	Gene Ontology	GO:0016616	4	108	0.294896	0.814297	KQ087360:2667102-2669282|KQ087373:131465-132914|KQ087375:436511-438273|KQ087362:2924274-2929987	http://amigo.geneontology.org/cgi-bin/amigo/term_details?term=GO:0016616
protein tyrosine kinase activity	Gene Ontology	GO:0004713	3	75	0.299106	0.814297	KQ087363:1961113-1963312|KQ087363:1004790-1007418|KQ087373:597107-601040	http://amigo.geneontology.org/cgi-bin/amigo/term_details?term=GO:0004713
coenzyme biosynthetic process	Gene Ontology	GO:0009108	3	75	0.299106	0.814297	KQ087365:2372967-2378471|KQ087362:2285060-2286293|KQ087365:2369227-2370352	http://amigo.geneontology.org/cgi-bin/amigo/term_details?term=GO:0009108
phosphotransferase activity, alcohol group as acceptor	Gene Ontology	GO:0016773	5	144	0.302238	0.814297	KQ087361:497876-498573|KQ087363:1004790-1007418|KQ087363:1961113-1963312|KQ087362:2481880-2484141|KQ087373:597107-601040	http://amigo.geneontology.org/cgi-bin/amigo/term_details?term=GO:0016773
cytoplasmic, membrane-bounded vesicle	Gene Ontology	GO:0016023	2	43	0.302633	0.814297	KQ087358:1660322-1672264|KQ087363:3265873-3267451	http://amigo.geneontology.org/cgi-bin/amigo/term_details?term=GO:0016023
membrane-bounded vesicle	Gene Ontology	GO:0031988	2	43	0.302633	0.814297	KQ087358:1660322-1672264|KQ087363:3265873-3267451	http://amigo.geneontology.org/cgi-bin/amigo/term_details?term=GO:0031988
biosynthetic process	Gene Ontology	GO:0009058	38	1382	0.303427	0.814297	KQ087360:1899458-1907109|KQ087361:497876-498573|KQ087370:266103-267749|KQ087376:94291-96718|KQ087367:532772-534988|KQ087362:622829-624191|KQ087358:1651081-1654414|KQ087362:429370-433224|KQ087371:585381-586918|KQ087362:2924274-2929987|KQ087363:2161676-2163275|KQ087373:200757-201957|KQ087360:37254-39213|KQ087375:490863-493383|KQ087365:801826-807624|KQ087375:105728-106744|KQ087360:34988-36578|KQ0873…	http://amigo.geneontology.org/cgi-bin/amigo/term_details?term=GO:0009058
peptide biosynthetic process	Gene Ontology	GO:0043043	7	216	0.306646	0.814297	KQ087362:429370-433224|KQ087358:1660322-1672264|KQ087363:537092-537675|KQ087358:1651081-1654414|KQ087358:2205989-2207522|KQ087360:37254-39213|KQ087367:1886428-1889941	http://amigo.geneontology.org/cgi-bin/amigo/term_details?term=GO:0043043
nucleoid	Gene Ontology	GO:0009295	1	14	0.311029	0.814297	KQ087370:266103-267749	http://amigo.geneontology.org/cgi-bin/amigo/term_details?term=GO:0009295
signal sequence binding	Gene Ontology	GO:0005048	1	14	0.311029	0.814297	KQ087362:1196774-1198078	http://amigo.geneontology.org/cgi-bin/amigo/term_details?term=GO:0005048
regulation of vesicle-mediated transport	Gene Ontology	GO:0060627	1	14	0.311029	0.814297	KQ087363:3265873-3267451	http://amigo.geneontology.org/cgi-bin/amigo/term_details?term=GO:0060627
phosphate transmembrane transporter activity	Gene Ontology	GO:1901677	1	14	0.311029	0.814297	KQ087365:1642849-1644666	http://amigo.geneontology.org/cgi-bin/amigo/term_details?term=GO:1901677
ribonucleoprotein granule	Gene Ontology	GO:0035770	1	14	0.311029	0.814297	KQ087363:3198271-3200281	http://amigo.geneontology.org/cgi-bin/amigo/term_details?term=GO:0035770
carbon catabolite regulation of transcription	Gene Ontology	GO:0045990	1	14	0.311029	0.814297	KQ087370:266103-267749	http://amigo.geneontology.org/cgi-bin/amigo/term_details?term=GO:0045990
asperthecin metabolic process	Gene Ontology	GO:0036182	1	14	0.311029	0.814297	KQ087365:2372967-2378471	http://amigo.geneontology.org/cgi-bin/amigo/term_details?term=GO:0036182
positive regulation of meiotic cell cycle	Gene Ontology	GO:0051446	1	14	0.311029	0.814297	KQ087362:862662-866724	http://amigo.geneontology.org/cgi-bin/amigo/term_details?term=GO:0051446
carboxylic acid transmembrane transport	Gene Ontology	GO:1905039	1	14	0.311029	0.814297	KQ087358:1380165-1382271	http://amigo.geneontology.org/cgi-bin/amigo/term_details?term=GO:1905039
xanthone-containing compound metabolic process	Gene Ontology	GO:2001305	1	14	0.311029	0.814297	KQ087367:1849073-1850422	http://amigo.geneontology.org/cgi-bin/amigo/term_details?term=GO:2001305
mitochondrial nucleoid	Gene Ontology	GO:0042645	1	14	0.311029	0.814297	KQ087370:266103-267749	http://amigo.geneontology.org/cgi-bin/amigo/term_details?term=GO:0042645
cytoplasmic ribonucleoprotein granule	Gene Ontology	GO:0036464	1	14	0.311029	0.814297	KQ087363:3198271-3200281	http://amigo.geneontology.org/cgi-bin/amigo/term_details?term=GO:0036464
intracellular vesicle	Gene Ontology	GO:0097708	2	44	0.311729	0.814297	KQ087358:1660322-1672264|KQ087363:3265873-3267451	http://amigo.geneontology.org/cgi-bin/amigo/term_details?term=GO:0097708
cytoplasmic vesicle	Gene Ontology	GO:0031410	2	44	0.311729	0.814297	KQ087358:1660322-1672264|KQ087363:3265873-3267451	http://amigo.geneontology.org/cgi-bin/amigo/term_details?term=GO:0031410
cytokinetic process	Gene Ontology	GO:0032506	2	44	0.311729	0.814297	KQ087360:1899458-1907109|KQ087367:532772-534988	http://amigo.geneontology.org/cgi-bin/amigo/term_details?term=GO:0032506
carboxylic ester hydrolase activity	Gene Ontology	GO:0052689	2	44	0.311729	0.814297	KQ087367:356152-357382|KQ087373:742427-746105	http://amigo.geneontology.org/cgi-bin/amigo/term_details?term=GO:0052689
phospholipid binding	Gene Ontology	GO:0005543	2	44	0.311729	0.814297	KQ087367:314348-315743|KQ087360:1177609-1179024	http://amigo.geneontology.org/cgi-bin/amigo/term_details?term=GO:0005543
regulation of cell differentiation	Gene Ontology	GO:0045595	2	44	0.311729	0.814297	KQ087375:289977-291200|KQ087362:862662-866724	http://amigo.geneontology.org/cgi-bin/amigo/term_details?term=GO:0045595
vesicle	Gene Ontology	GO:0031982	2	44	0.311729	0.814297	KQ087358:1660322-1672264|KQ087363:3265873-3267451	http://amigo.geneontology.org/cgi-bin/amigo/term_details?term=GO:0031982
catabolic process	Gene Ontology	GO:0009056	13	439	0.31633	0.824305	KQ087367:356152-357382|KQ087370:266103-267749|KQ087363:1007886-1012571|KQ087360:37254-39213|KQ087365:449005-449578|KQ087376:56623-57856|KQ087360:2194518-2195525|KQ087358:1526267-1527664|KQ087373:131465-132914|KQ087364:910390-912706|KQ087358:2139490-2144714|KQ087365:447988-448935|KQ087362:2998114-2999250	http://amigo.geneontology.org/cgi-bin/amigo/term_details?term=GO:0009056
organic substance biosynthetic process	Gene Ontology	GO:1901576	36	1314	0.318115	0.826946	KQ087360:1899458-1907109|KQ087361:497876-498573|KQ087370:266103-267749|KQ087376:94291-96718|KQ087367:532772-534988|KQ087358:1651081-1654414|KQ087371:585381-586918|KQ087362:2924274-2929987|KQ087363:2161676-2163275|KQ087373:200757-201957|KQ087362:429370-433224|KQ087375:490863-493383|KQ087365:801826-807624|KQ087375:105728-106744|KQ087360:34988-36578|KQ087363:1088182-1089795|KQ087362:1491668-1493040|…	http://amigo.geneontology.org/cgi-bin/amigo/term_details?term=GO:1901576
fungal-type cell wall biogenesis	Gene Ontology	GO:0009272	2	45	0.3208	0.828368	KQ087360:1899458-1907109|KQ087367:532772-534988	http://amigo.geneontology.org/cgi-bin/amigo/term_details?term=GO:0009272
endocytosis	Gene Ontology	GO:0006897	2	45	0.3208	0.828368	KQ087363:3265873-3267451|KQ087373:200757-201957	http://amigo.geneontology.org/cgi-bin/amigo/term_details?term=GO:0006897
regulation of polysaccharide metabolic process	Gene Ontology	GO:0032881	1	15	0.327944	0.828368	KQ087367:532772-534988	http://amigo.geneontology.org/cgi-bin/amigo/term_details?term=GO:0032881
anion transmembrane transport	Gene Ontology	GO:0098656	1	15	0.327944	0.828368	KQ087365:1642849-1644666	http://amigo.geneontology.org/cgi-bin/amigo/term_details?term=GO:0098656
acetyl-CoA metabolic process	Gene Ontology	GO:0006084	1	15	0.327944	0.828368	KQ087362:2285060-2286293	http://amigo.geneontology.org/cgi-bin/amigo/term_details?term=GO:0006084
cellular response to neutral pH	Gene Ontology	GO:0036244	1	15	0.327944	0.828368	KQ087369:690204-691637	http://amigo.geneontology.org/cgi-bin/amigo/term_details?term=GO:0036244
oxidoreductase activity, acting on paired donors, with incorporation or reduction of molecular oxygen, 2-oxoglutarate as one donor, and incorporation of one atom each of oxygen into both donors	Gene Ontology	GO:0016706	1	15	0.327944	0.828368	KQ087365:2369227-2370352	http://amigo.geneontology.org/cgi-bin/amigo/term_details?term=GO:0016706
regulation of meiotic nuclear division	Gene Ontology	GO:0040020	1	15	0.327944	0.828368	KQ087363:1961113-1963312	http://amigo.geneontology.org/cgi-bin/amigo/term_details?term=GO:0040020
carbohydrate transport	Gene Ontology	GO:0008643	1	15	0.327944	0.828368	KQ087374:247101-249213	http://amigo.geneontology.org/cgi-bin/amigo/term_details?term=GO:0008643
organic hydroxy compound catabolic process	Gene Ontology	GO:1901616	1	15	0.327944	0.828368	KQ087360:2194518-2195525	http://amigo.geneontology.org/cgi-bin/amigo/term_details?term=GO:1901616
organic acid transmembrane transport	Gene Ontology	GO:1903825	1	15	0.327944	0.828368	KQ087358:1380165-1382271	http://amigo.geneontology.org/cgi-bin/amigo/term_details?term=GO:1903825
sterigmatocystin metabolic process	Gene Ontology	GO:0045460	2	46	0.329841	0.829249	KQ087365:2372967-2378471|KQ087362:862662-866724	http://amigo.geneontology.org/cgi-bin/amigo/term_details?term=GO:0045460
sterigmatocystin biosynthetic process	Gene Ontology	GO:0045461	2	46	0.329841	0.829249	KQ087365:2372967-2378471|KQ087362:862662-866724	http://amigo.geneontology.org/cgi-bin/amigo/term_details?term=GO:0045461
kinase activity	Gene Ontology	GO:0016301	5	151	0.336096	0.83032	KQ087361:497876-498573|KQ087363:1004790-1007418|KQ087363:1961113-1963312|KQ087362:2481880-2484141|KQ087373:597107-601040	http://amigo.geneontology.org/cgi-bin/amigo/term_details?term=GO:0016301
sulfur compound biosynthetic process	Gene Ontology	GO:0044272	2	47	0.33885	0.83032	KQ087363:1088182-1089795|KQ087362:2285060-2286293	http://amigo.geneontology.org/cgi-bin/amigo/term_details?term=GO:0044272
interspecies interaction between organisms	Gene Ontology	GO:0044419	2	47	0.33885	0.83032	KQ087375:490863-493383|KQ087363:3198271-3200281	http://amigo.geneontology.org/cgi-bin/amigo/term_details?term=GO:0044419
regulation of meiotic cell cycle	Gene Ontology	GO:0051445	2	47	0.33885	0.83032	KQ087362:862662-866724|KQ087363:1961113-1963312	http://amigo.geneontology.org/cgi-bin/amigo/term_details?term=GO:0051445
establishment of protein localization to peroxisome	Gene Ontology	GO:0072663	1	16	0.344445	0.83032	KQ087362:1196774-1198078	http://amigo.geneontology.org/cgi-bin/amigo/term_details?term=GO:0072663
symporter activity	Gene Ontology	GO:0015293	1	16	0.344445	0.83032	KQ087365:1642849-1644666	http://amigo.geneontology.org/cgi-bin/amigo/term_details?term=GO:0015293
transferase activity, transferring pentosyl groups	Gene Ontology	GO:0016763	1	16	0.344445	0.83032	KQ087364:910390-912706	http://amigo.geneontology.org/cgi-bin/amigo/term_details?term=GO:0016763
import into cell	Gene Ontology	GO:0098657	1	16	0.344445	0.83032	KQ087365:2369227-2370352	http://amigo.geneontology.org/cgi-bin/amigo/term_details?term=GO:0098657
incipient cellular bud site	Gene Ontology	GO:0000131	1	16	0.344445	0.83032	KQ087367:532772-534988	http://amigo.geneontology.org/cgi-bin/amigo/term_details?term=GO:0000131
regulation of defense response	Gene Ontology	GO:0031347	1	16	0.344445	0.83032	KQ087375:490863-493383	http://amigo.geneontology.org/cgi-bin/amigo/term_details?term=GO:0031347
modulation by symbiont of host defense response	Gene Ontology	GO:0052031	1	16	0.344445	0.83032	KQ087375:490863-493383	http://amigo.geneontology.org/cgi-bin/amigo/term_details?term=GO:0052031
protein targeting to peroxisome	Gene Ontology	GO:0006625	1	16	0.344445	0.83032	KQ087362:1196774-1198078	http://amigo.geneontology.org/cgi-bin/amigo/term_details?term=GO:0006625
solute:cation symporter activity	Gene Ontology	GO:0015294	1	16	0.344445	0.83032	KQ087365:1642849-1644666	http://amigo.geneontology.org/cgi-bin/amigo/term_details?term=GO:0015294
protein localization to peroxisome	Gene Ontology	GO:0072662	1	16	0.344445	0.83032	KQ087362:1196774-1198078	http://amigo.geneontology.org/cgi-bin/amigo/term_details?term=GO:0072662
filamentous growth of a population of unicellular organisms in response to neutral pH	Gene Ontology	GO:0036178	1	16	0.344445	0.83032	KQ087369:690204-691637	http://amigo.geneontology.org/cgi-bin/amigo/term_details?term=GO:0036178
modulation by organism of defense response of other organism involved in symbiotic interaction	Gene Ontology	GO:0052255	1	16	0.344445	0.83032	KQ087375:490863-493383	http://amigo.geneontology.org/cgi-bin/amigo/term_details?term=GO:0052255
regulation of cell wall organization or biogenesis	Gene Ontology	GO:1903338	1	16	0.344445	0.83032	KQ087367:532772-534988	http://amigo.geneontology.org/cgi-bin/amigo/term_details?term=GO:1903338
peroxisomal transport	Gene Ontology	GO:0043574	1	16	0.344445	0.83032	KQ087362:1196774-1198078	http://amigo.geneontology.org/cgi-bin/amigo/term_details?term=GO:0043574
coenzyme metabolic process	Gene Ontology	GO:0006732	4	117	0.344998	0.83032	KQ087370:266103-267749|KQ087365:2372967-2378471|KQ087362:2285060-2286293|KQ087365:2369227-2370352	http://amigo.geneontology.org/cgi-bin/amigo/term_details?term=GO:0006732
asexual sporulation	Gene Ontology	GO:0030436	5	153	0.345838	0.830476	KQ087366:1113367-1114312|KQ087375:289977-291200|KQ087362:862662-866724|KQ087374:264300-264824|KQ087369:690204-691637	http://amigo.geneontology.org/cgi-bin/amigo/term_details?term=GO:0030436
iron ion binding	Gene Ontology	GO:0005506	4	118	0.350592	0.831723	KQ087359:2283519-2284864|KQ087362:862662-866724|KQ087360:2194518-2195525|KQ087365:2369227-2370352	http://amigo.geneontology.org/cgi-bin/amigo/term_details?term=GO:0005506
vacuolar part	Gene Ontology	GO:0044437	4	119	0.356187	0.831723	KQ087360:2567613-2574708|KQ087365:308012-309649|KQ087373:200757-201957|KQ087371:410140-412175	http://amigo.geneontology.org/cgi-bin/amigo/term_details?term=GO:0044437
purine-containing compound biosynthetic process	Gene Ontology	GO:0072522	2	49	0.356752	0.831723	KQ087375:490863-493383|KQ087362:2285060-2286293	http://amigo.geneontology.org/cgi-bin/amigo/term_details?term=GO:0072522
reciprocal DNA recombination	Gene Ontology	GO:0035825	1	17	0.360543	0.831723	KQ087363:1961113-1963312	http://amigo.geneontology.org/cgi-bin/amigo/term_details?term=GO:0035825
acyl-CoA metabolic process	Gene Ontology	GO:0006637	1	17	0.360543	0.831723	KQ087362:2285060-2286293	http://amigo.geneontology.org/cgi-bin/amigo/term_details?term=GO:0006637
negative regulation of asexual reproduction	Gene Ontology	GO:1903665	1	17	0.360543	0.831723	KQ087362:862662-866724	http://amigo.geneontology.org/cgi-bin/amigo/term_details?term=GO:1903665
amino acid transport	Gene Ontology	GO:0006865	1	17	0.360543	0.831723	KQ087375:930620-932510	http://amigo.geneontology.org/cgi-bin/amigo/term_details?term=GO:0006865
purine nucleobase metabolic process	Gene Ontology	GO:0006144	1	17	0.360543	0.831723	KQ087375:490863-493383	http://amigo.geneontology.org/cgi-bin/amigo/term_details?term=GO:0006144
mannosyltransferase activity	Gene Ontology	GO:0000030	1	17	0.360543	0.831723	KQ087373:200757-201957	http://amigo.geneontology.org/cgi-bin/amigo/term_details?term=GO:0000030
cellular aldehyde metabolic process	Gene Ontology	GO:0006081	1	17	0.360543	0.831723	KQ087370:266103-267749	http://amigo.geneontology.org/cgi-bin/amigo/term_details?term=GO:0006081
aminopeptidase activity	Gene Ontology	GO:0004177	1	17	0.360543	0.831723	KQ087368:138458-140429	http://amigo.geneontology.org/cgi-bin/amigo/term_details?term=GO:0004177
reciprocal meiotic recombination	Gene Ontology	GO:0007131	1	17	0.360543	0.831723	KQ087363:1961113-1963312	http://amigo.geneontology.org/cgi-bin/amigo/term_details?term=GO:0007131
response to neutral pH	Gene Ontology	GO:0036176	1	17	0.360543	0.831723	KQ087369:690204-691637	http://amigo.geneontology.org/cgi-bin/amigo/term_details?term=GO:0036176
carbon-sulfur lyase activity	Gene Ontology	GO:0016846	1	17	0.360543	0.831723	KQ087366:1128717-1129315	http://amigo.geneontology.org/cgi-bin/amigo/term_details?term=GO:0016846
thioester metabolic process	Gene Ontology	GO:0035383	1	17	0.360543	0.831723	KQ087362:2285060-2286293	http://amigo.geneontology.org/cgi-bin/amigo/term_details?term=GO:0035383
cellular biosynthetic process	Gene Ontology	GO:0044249	35	1301	0.362305	0.831723	KQ087360:1899458-1907109|KQ087361:497876-498573|KQ087370:266103-267749|KQ087376:94291-96718|KQ087367:532772-534988|KQ087358:1651081-1654414|KQ087371:585381-586918|KQ087362:2924274-2929987|KQ087363:2161676-2163275|KQ087373:200757-201957|KQ087362:429370-433224|KQ087375:490863-493383|KQ087365:801826-807624|KQ087375:105728-106744|KQ087360:34988-36578|KQ087363:1088182-1089795|KQ087362:1491668-1493040|…	http://amigo.geneontology.org/cgi-bin/amigo/term_details?term=GO:0044249
primary metabolic process	Gene Ontology	GO:0044238	57	2162	0.366902	0.831723	KQ087360:1899458-1907109|KQ087363:1007886-1012571|KQ087367:1525784-1528662|KQ087370:266103-267749|KQ087365:801826-807624|KQ087376:94291-96718|KQ087363:1004790-1007418|KQ087367:532772-534988|KQ087363:537092-537675|KQ087358:1526267-1527664|KQ087360:750478-752036|KQ087363:3265873-3267451|KQ087371:585381-586918|KQ087358:2139490-2144714|KQ087362:2924274-2929987|KQ087363:2161676-2163275|KQ087358:177502…	http://amigo.geneontology.org/cgi-bin/amigo/term_details?term=GO:0044238
peptide metabolic process	Gene Ontology	GO:0006518	7	232	0.370398	0.831723	KQ087362:429370-433224|KQ087358:1660322-1672264|KQ087363:537092-537675|KQ087358:1651081-1654414|KQ087358:2205989-2207522|KQ087360:37254-39213|KQ087367:1886428-1889941	http://amigo.geneontology.org/cgi-bin/amigo/term_details?term=GO:0006518
lipid binding	Gene Ontology	GO:0008289	2	51	0.374478	0.831723	KQ087367:314348-315743|KQ087360:1177609-1179024	http://amigo.geneontology.org/cgi-bin/amigo/term_details?term=GO:0008289
organic substance catabolic process	Gene Ontology	GO:1901575	12	422	0.376108	0.831723	KQ087367:356152-357382|KQ087370:266103-267749|KQ087363:1007886-1012571|KQ087376:56623-57856|KQ087365:449005-449578|KQ087360:2194518-2195525|KQ087358:1526267-1527664|KQ087373:131465-132914|KQ087364:910390-912706|KQ087358:2139490-2144714|KQ087365:447988-448935|KQ087362:2998114-2999250	http://amigo.geneontology.org/cgi-bin/amigo/term_details?term=GO:1901575
modification of morphology or physiology of other organism	Gene Ontology	GO:0035821	1	18	0.376247	0.831723	KQ087375:490863-493383	http://amigo.geneontology.org/cgi-bin/amigo/term_details?term=GO:0035821
negative regulation of cell differentiation	Gene Ontology	GO:0045596	1	18	0.376247	0.831723	KQ087362:862662-866724	http://amigo.geneontology.org/cgi-bin/amigo/term_details?term=GO:0045596
regulation of cellular carbohydrate metabolic process	Gene Ontology	GO:0010675	1	18	0.376247	0.831723	KQ087367:532772-534988	http://amigo.geneontology.org/cgi-bin/amigo/term_details?term=GO:0010675
serine-type endopeptidase activity	Gene Ontology	GO:0004252	1	18	0.376247	0.831723	KQ087368:138458-140429	http://amigo.geneontology.org/cgi-bin/amigo/term_details?term=GO:0004252
modification of morphology or physiology of other organism involved in symbiotic interaction	Gene Ontology	GO:0051817	1	18	0.376247	0.831723	KQ087375:490863-493383	http://amigo.geneontology.org/cgi-bin/amigo/term_details?term=GO:0051817
filamentous growth of a population of unicellular organisms in response to pH	Gene Ontology	GO:0036177	1	18	0.376247	0.831723	KQ087369:690204-691637	http://amigo.geneontology.org/cgi-bin/amigo/term_details?term=GO:0036177
UDP-glycosyltransferase activity	Gene Ontology	GO:0008194	1	18	0.376247	0.831723	KQ087360:1899458-1907109	http://amigo.geneontology.org/cgi-bin/amigo/term_details?term=GO:0008194
beta-glucan metabolic process	Gene Ontology	GO:0051273	1	18	0.376247	0.831723	KQ087367:532772-534988	http://amigo.geneontology.org/cgi-bin/amigo/term_details?term=GO:0051273
meiotic chromosome segregation	Gene Ontology	GO:0045132	1	18	0.376247	0.831723	KQ087363:1961113-1963312	http://amigo.geneontology.org/cgi-bin/amigo/term_details?term=GO:0045132
oxidoreductase activity, acting on single donors with incorporation of molecular oxygen, incorporation of two atoms of oxygen	Gene Ontology	GO:0016702	1	18	0.376247	0.831723	KQ087362:862662-866724	http://amigo.geneontology.org/cgi-bin/amigo/term_details?term=GO:0016702
nucleobase biosynthetic process	Gene Ontology	GO:0046112	1	18	0.376247	0.831723	KQ087375:490863-493383	http://amigo.geneontology.org/cgi-bin/amigo/term_details?term=GO:0046112
spore wall assembly	Gene Ontology	GO:0042244	1	18	0.376247	0.831723	KQ087374:264300-264824	http://amigo.geneontology.org/cgi-bin/amigo/term_details?term=GO:0042244
modification by symbiont of host morphology or physiology	Gene Ontology	GO:0044003	1	18	0.376247	0.831723	KQ087375:490863-493383	http://amigo.geneontology.org/cgi-bin/amigo/term_details?term=GO:0044003
negative regulation of sporulation resulting in formation of a cellular spore	Gene Ontology	GO:0042174	1	18	0.376247	0.831723	KQ087362:862662-866724	http://amigo.geneontology.org/cgi-bin/amigo/term_details?term=GO:0042174
cellular amide metabolic process	Gene Ontology	GO:0043603	8	271	0.376644	0.831723	KQ087362:429370-433224|KQ087358:1660322-1672264|KQ087363:537092-537675|KQ087358:1651081-1654414|KQ087358:2205989-2207522|KQ087360:37254-39213|KQ087362:862662-866724|KQ087367:1886428-1889941	http://amigo.geneontology.org/cgi-bin/amigo/term_details?term=GO:0043603
amide biosynthetic process	Gene Ontology	GO:0043604	7	235	0.382491	0.841356	KQ087362:429370-433224|KQ087358:1660322-1672264|KQ087363:537092-537675|KQ087358:1651081-1654414|KQ087358:2205989-2207522|KQ087360:37254-39213|KQ087367:1886428-1889941	http://amigo.geneontology.org/cgi-bin/amigo/term_details?term=GO:0043604
pectin catabolic process	Gene Ontology	GO:0045490	1	19	0.391567	0.841356	KQ087376:56623-57856	http://amigo.geneontology.org/cgi-bin/amigo/term_details?term=GO:0045490
pectin metabolic process	Gene Ontology	GO:0045488	1	19	0.391567	0.841356	KQ087376:56623-57856	http://amigo.geneontology.org/cgi-bin/amigo/term_details?term=GO:0045488
fungal-type cell wall polysaccharide biosynthetic process	Gene Ontology	GO:0051278	1	19	0.391567	0.841356	KQ087367:532772-534988	http://amigo.geneontology.org/cgi-bin/amigo/term_details?term=GO:0051278
intrinsic component of plasma membrane	Gene Ontology	GO:0031226	1	19	0.391567	0.841356	KQ087365:1642849-1644666	http://amigo.geneontology.org/cgi-bin/amigo/term_details?term=GO:0031226
transferase activity, transferring nitrogenous groups	Gene Ontology	GO:0016769	1	19	0.391567	0.841356	KQ087367:7114-8303	http://amigo.geneontology.org/cgi-bin/amigo/term_details?term=GO:0016769
transaminase activity	Gene Ontology	GO:0008483	1	19	0.391567	0.841356	KQ087367:7114-8303	http://amigo.geneontology.org/cgi-bin/amigo/term_details?term=GO:0008483
cellular response to nutrient	Gene Ontology	GO:0031670	1	19	0.391567	0.841356	KQ087370:266103-267749	http://amigo.geneontology.org/cgi-bin/amigo/term_details?term=GO:0031670
regulation of sterigmatocystin biosynthetic process	Gene Ontology	GO:0010913	1	19	0.391567	0.841356	KQ087362:862662-866724	http://amigo.geneontology.org/cgi-bin/amigo/term_details?term=GO:0010913
NADP binding	Gene Ontology	GO:0050661	1	19	0.391567	0.841356	KQ087364:1203653-1205335	http://amigo.geneontology.org/cgi-bin/amigo/term_details?term=GO:0050661
lipid particle	Gene Ontology	GO:0005811	1	19	0.391567	0.841356	KQ087362:2915437-2921767	http://amigo.geneontology.org/cgi-bin/amigo/term_details?term=GO:0005811
defense response	Gene Ontology	GO:0006952	1	19	0.391567	0.841356	KQ087375:490863-493383	http://amigo.geneontology.org/cgi-bin/amigo/term_details?term=GO:0006952
galacturonan metabolic process	Gene Ontology	GO:0010393	1	19	0.391567	0.841356	KQ087376:56623-57856	http://amigo.geneontology.org/cgi-bin/amigo/term_details?term=GO:0010393
endopeptidase activity	Gene Ontology	GO:0004175	2	53	0.392004	0.841356	KQ087368:138458-140429|KQ087364:634810-635620	http://amigo.geneontology.org/cgi-bin/amigo/term_details?term=GO:0004175
cellular ketone metabolic process	Gene Ontology	GO:0042180	3	90	0.399834	0.847033	KQ087367:1849073-1850422|KQ087365:2372967-2378471|KQ087365:2369227-2370352	http://amigo.geneontology.org/cgi-bin/amigo/term_details?term=GO:0042180
regulation of anatomical structure morphogenesis	Gene Ontology	GO:0022603	3	90	0.399834	0.847033	KQ087366:1113367-1114312|KQ087375:289977-291200|KQ087362:862662-866724	http://amigo.geneontology.org/cgi-bin/amigo/term_details?term=GO:0022603
cellular amine metabolic process	Gene Ontology	GO:0044106	2	54	0.400685	0.847033	KQ087367:372911-374048|KQ087362:862662-866724	http://amigo.geneontology.org/cgi-bin/amigo/term_details?term=GO:0044106
regulation of localization	Gene Ontology	GO:0032879	2	54	0.400685	0.847033	KQ087363:3265873-3267451|KQ087365:2369227-2370352	http://amigo.geneontology.org/cgi-bin/amigo/term_details?term=GO:0032879
cellular response to nutrient levels	Gene Ontology	GO:0031669	4	128	0.406406	0.847033	KQ087370:266103-267749|KQ087366:1113367-1114312|KQ087369:690204-691637|KQ087365:2369227-2370352	http://amigo.geneontology.org/cgi-bin/amigo/term_details?term=GO:0031669
organonitrogen compound catabolic process	Gene Ontology	GO:1901565	3	91	0.406453	0.847033	KQ087370:266103-267749|KQ087363:1007886-1012571|KQ087358:2139490-2144714	http://amigo.geneontology.org/cgi-bin/amigo/term_details?term=GO:1901565
microbody membrane	Gene Ontology	GO:0031903	1	20	0.406513	0.847033	KQ087362:1196774-1198078	http://amigo.geneontology.org/cgi-bin/amigo/term_details?term=GO:0031903
glycolipid biosynthetic process	Gene Ontology	GO:0009247	1	20	0.406513	0.847033	KQ087373:200757-201957	http://amigo.geneontology.org/cgi-bin/amigo/term_details?term=GO:0009247
peptide binding	Gene Ontology	GO:0042277	1	20	0.406513	0.847033	KQ087362:1196774-1198078	http://amigo.geneontology.org/cgi-bin/amigo/term_details?term=GO:0042277
response to nutrient	Gene Ontology	GO:0007584	1	20	0.406513	0.847033	KQ087370:266103-267749	http://amigo.geneontology.org/cgi-bin/amigo/term_details?term=GO:0007584
cell wall assembly	Gene Ontology	GO:0070726	1	20	0.406513	0.847033	KQ087374:264300-264824	http://amigo.geneontology.org/cgi-bin/amigo/term_details?term=GO:0070726
response to salt stress	Gene Ontology	GO:0009651	1	20	0.406513	0.847033	KQ087358:1775025-1776704	http://amigo.geneontology.org/cgi-bin/amigo/term_details?term=GO:0009651
peroxisomal membrane	Gene Ontology	GO:0005778	1	20	0.406513	0.847033	KQ087362:1196774-1198078	http://amigo.geneontology.org/cgi-bin/amigo/term_details?term=GO:0005778
fungal-type cell wall polysaccharide metabolic process	Gene Ontology	GO:0071966	1	20	0.406513	0.847033	KQ087367:532772-534988	http://amigo.geneontology.org/cgi-bin/amigo/term_details?term=GO:0071966
spore wall biogenesis	Gene Ontology	GO:0070590	1	20	0.406513	0.847033	KQ087374:264300-264824	http://amigo.geneontology.org/cgi-bin/amigo/term_details?term=GO:0070590
single-organism transport	Gene Ontology	GO:0044765	8	280	0.410394	0.851806	KQ087366:601329-603986|KQ087362:1196774-1198078|KQ087375:930620-932510|KQ087365:2369227-2370352|KQ087374:247101-249213|KQ087360:2567613-2574708|KQ087363:3265873-3267451|KQ087358:1380165-1382271	http://amigo.geneontology.org/cgi-bin/amigo/term_details?term=GO:0044765
cellular response to extracellular stimulus	Gene Ontology	GO:0031668	4	129	0.411951	0.853384	KQ087370:266103-267749|KQ087366:1113367-1114312|KQ087369:690204-691637|KQ087365:2369227-2370352	http://amigo.geneontology.org/cgi-bin/amigo/term_details?term=GO:0031668
response to external stimulus	Gene Ontology	GO:0009605	5	167	0.414198	0.856383	KQ087370:266103-267749|KQ087366:1113367-1114312|KQ087369:690204-691637|KQ087375:490863-493383|KQ087365:2369227-2370352	http://amigo.geneontology.org/cgi-bin/amigo/term_details?term=GO:0009605
mitotic cytokinesis	Gene Ontology	GO:0000281	2	56	0.417869	0.857027	KQ087360:1899458-1907109|KQ087367:532772-534988	http://amigo.geneontology.org/cgi-bin/amigo/term_details?term=GO:0000281
cellular carbohydrate biosynthetic process	Gene Ontology	GO:0034637	2	56	0.417869	0.857027	KQ087360:1899458-1907109|KQ087367:532772-534988	http://amigo.geneontology.org/cgi-bin/amigo/term_details?term=GO:0034637
cellular lactam metabolic process	Gene Ontology	GO:0072338	1	21	0.421092	0.857027	KQ087362:862662-866724	http://amigo.geneontology.org/cgi-bin/amigo/term_details?term=GO:0072338
pyruvate metabolic process	Gene Ontology	GO:0006090	1	21	0.421092	0.857027	KQ087370:266103-267749	http://amigo.geneontology.org/cgi-bin/amigo/term_details?term=GO:0006090
beta-lactam antibiotic metabolic process	Gene Ontology	GO:0030653	1	21	0.421092	0.857027	KQ087362:862662-866724	http://amigo.geneontology.org/cgi-bin/amigo/term_details?term=GO:0030653
antibiotic metabolic process	Gene Ontology	GO:0016999	1	21	0.421092	0.857027	KQ087362:862662-866724	http://amigo.geneontology.org/cgi-bin/amigo/term_details?term=GO:0016999
mycotoxin metabolic process	Gene Ontology	GO:0043385	1	21	0.421092	0.857027	KQ087360:37254-39213	http://amigo.geneontology.org/cgi-bin/amigo/term_details?term=GO:0043385
penicillin metabolic process	Gene Ontology	GO:0042316	1	21	0.421092	0.857027	KQ087362:862662-866724	http://amigo.geneontology.org/cgi-bin/amigo/term_details?term=GO:0042316
substrate-specific transmembrane transporter activity	Gene Ontology	GO:0022891	7	245	0.42284	0.857027	KQ087369:587487-589168|KQ087366:601329-603986|KQ087375:930620-932510|KQ087365:1791220-1792996|KQ087374:247101-249213|KQ087365:1642849-1644666|KQ087358:1380165-1382271	http://amigo.geneontology.org/cgi-bin/amigo/term_details?term=GO:0022891
asexual reproduction	Gene Ontology	GO:0019954	5	169	0.423916	0.857027	KQ087366:1113367-1114312|KQ087375:289977-291200|KQ087362:862662-866724|KQ087374:264300-264824|KQ087369:690204-691637	http://amigo.geneontology.org/cgi-bin/amigo/term_details?term=GO:0019954
peptidase activity, acting on L-amino acid peptides	Gene Ontology	GO:0070011	3	94	0.426178	0.857027	KQ087368:138458-140429|KQ087364:634810-635620|KQ087363:1013863-1015644	http://amigo.geneontology.org/cgi-bin/amigo/term_details?term=GO:0070011
methyltransferase activity	Gene Ontology	GO:0008168	3	94	0.426178	0.857027	KQ087375:490863-493383|KQ087363:629074-630563|KQ087362:622829-624191	http://amigo.geneontology.org/cgi-bin/amigo/term_details?term=GO:0008168
cellular response to external stimulus	Gene Ontology	GO:0071496	4	132	0.428518	0.857027	KQ087370:266103-267749|KQ087366:1113367-1114312|KQ087369:690204-691637|KQ087365:2369227-2370352	http://amigo.geneontology.org/cgi-bin/amigo/term_details?term=GO:0071496
cytoskeleton-dependent cytokinesis	Gene Ontology	GO:0061640	2	58	0.434801	0.857027	KQ087360:1899458-1907109|KQ087367:532772-534988	http://amigo.geneontology.org/cgi-bin/amigo/term_details?term=GO:0061640
carbon-oxygen lyase activity	Gene Ontology	GO:0016835	2	58	0.434801	0.857027	KQ087363:1088182-1089795|KQ087362:2915437-2921767	http://amigo.geneontology.org/cgi-bin/amigo/term_details?term=GO:0016835
regulation of conidium formation	Gene Ontology	GO:0075306	1	22	0.435315	0.857027	KQ087366:1113367-1114312	http://amigo.geneontology.org/cgi-bin/amigo/term_details?term=GO:0075306
cell wall polysaccharide biosynthetic process	Gene Ontology	GO:0070592	1	22	0.435315	0.857027	KQ087367:532772-534988	http://amigo.geneontology.org/cgi-bin/amigo/term_details?term=GO:0070592
monodictyphenone metabolic process	Gene Ontology	GO:1900813	1	22	0.435315	0.857027	KQ087365:2372967-2378471	http://amigo.geneontology.org/cgi-bin/amigo/term_details?term=GO:1900813
monodictyphenone biosynthetic process	Gene Ontology	GO:1900815	1	22	0.435315	0.857027	KQ087365:2372967-2378471	http://amigo.geneontology.org/cgi-bin/amigo/term_details?term=GO:1900815
transition metal ion transmembrane transporter activity	Gene Ontology	GO:0046915	1	22	0.435315	0.857027	KQ087365:1642849-1644666	http://amigo.geneontology.org/cgi-bin/amigo/term_details?term=GO:0046915
drug metabolic process	Gene Ontology	GO:0017144	1	22	0.435315	0.857027	KQ087362:862662-866724	http://amigo.geneontology.org/cgi-bin/amigo/term_details?term=GO:0017144
cleistothecium development	Gene Ontology	GO:0070791	1	22	0.435315	0.857027	KQ087366:1113367-1114312	http://amigo.geneontology.org/cgi-bin/amigo/term_details?term=GO:0070791
regulation of carbohydrate metabolic process	Gene Ontology	GO:0006109	1	22	0.435315	0.857027	KQ087367:532772-534988	http://amigo.geneontology.org/cgi-bin/amigo/term_details?term=GO:0006109
cellular biogenic amine metabolic process	Gene Ontology	GO:0006576	1	22	0.435315	0.857027	KQ087367:372911-374048	http://amigo.geneontology.org/cgi-bin/amigo/term_details?term=GO:0006576
ligase activity, forming carbon-nitrogen bonds	Gene Ontology	GO:0016879	2	59	0.443168	0.86983	KQ087360:2567613-2574708|KQ087362:2285060-2286293	http://amigo.geneontology.org/cgi-bin/amigo/term_details?term=GO:0016879
cellular lipid metabolic process	Gene Ontology	GO:0044255	6	212	0.445532	0.86983	KQ087362:1491668-1493040|KQ087369:690204-691637|KQ087373:200757-201957|KQ087362:2915437-2921767|KQ087360:2567613-2574708|KQ087362:862662-866724	http://amigo.geneontology.org/cgi-bin/amigo/term_details?term=GO:0044255
cellular response to chemical stimulus	Gene Ontology	GO:0070887	9	329	0.448381	0.86983	KQ087362:1491668-1493040|KQ087360:1899458-1907109|KQ087360:2194518-2195525|KQ087370:266103-267749|KQ087362:2915437-2921767|KQ087358:1651081-1654414|KQ087365:308012-309649|KQ087366:1736570-1737723|KQ087362:2478582-2479567	http://amigo.geneontology.org/cgi-bin/amigo/term_details?term=GO:0070887
endoribonuclease activity	Gene Ontology	GO:0004521	1	23	0.44919	0.86983	KQ087363:537092-537675	http://amigo.geneontology.org/cgi-bin/amigo/term_details?term=GO:0004521
protein targeting to membrane	Gene Ontology	GO:0006612	1	23	0.44919	0.86983	KQ087362:1196774-1198078	http://amigo.geneontology.org/cgi-bin/amigo/term_details?term=GO:0006612
glycolipid metabolic process	Gene Ontology	GO:0006664	1	23	0.44919	0.86983	KQ087373:200757-201957	http://amigo.geneontology.org/cgi-bin/amigo/term_details?term=GO:0006664
Golgi subcompartment	Gene Ontology	GO:0098791	1	23	0.44919	0.86983	KQ087373:200757-201957	http://amigo.geneontology.org/cgi-bin/amigo/term_details?term=GO:0098791
response to host defenses	Gene Ontology	GO:0052200	1	23	0.44919	0.86983	KQ087375:490863-493383	http://amigo.geneontology.org/cgi-bin/amigo/term_details?term=GO:0052200
Golgi membrane	Gene Ontology	GO:0000139	1	23	0.44919	0.86983	KQ087373:200757-201957	http://amigo.geneontology.org/cgi-bin/amigo/term_details?term=GO:0000139
toxin biosynthetic process	Gene Ontology	GO:0009403	2	60	0.451467	0.86983	KQ087365:2372967-2378471|KQ087362:862662-866724	http://amigo.geneontology.org/cgi-bin/amigo/term_details?term=GO:0009403
nucleotide binding	Gene Ontology	GO:0000166	19	722	0.453838	0.86983	KQ087361:497876-498573|KQ087369:867503-869432|KQ087366:1209805-1211239|KQ087373:597107-601040|KQ087360:2567613-2574708|KQ087367:1671961-1673346|KQ087363:1004790-1007418|KQ087375:436511-438273|KQ087369:646840-650026|KQ087360:2667102-2669282|KQ087360:124196-127151|KQ087360:712599-714563|KQ087359:427923-429827|KQ087373:131465-132914|KQ087358:1286557-1288080|KQ087362:2481880-2484141|KQ087367:1886428-…	http://amigo.geneontology.org/cgi-bin/amigo/term_details?term=GO:0000166
nucleoside phosphate binding	Gene Ontology	GO:1901265	19	722	0.453838	0.86983	KQ087361:497876-498573|KQ087369:867503-869432|KQ087366:1209805-1211239|KQ087373:597107-601040|KQ087360:2567613-2574708|KQ087367:1671961-1673346|KQ087363:1004790-1007418|KQ087375:436511-438273|KQ087369:646840-650026|KQ087360:2667102-2669282|KQ087360:124196-127151|KQ087360:712599-714563|KQ087359:427923-429827|KQ087373:131465-132914|KQ087358:1286557-1288080|KQ087362:2481880-2484141|KQ087367:1886428-…	http://amigo.geneontology.org/cgi-bin/amigo/term_details?term=GO:1901265
amine metabolic process	Gene Ontology	GO:0009308	2	61	0.459695	0.86983	KQ087367:372911-374048|KQ087362:862662-866724	http://amigo.geneontology.org/cgi-bin/amigo/term_details?term=GO:0009308
protein import	Gene Ontology	GO:0017038	2	61	0.459695	0.86983	KQ087362:1196774-1198078|KQ087360:2567613-2574708	http://amigo.geneontology.org/cgi-bin/amigo/term_details?term=GO:0017038
response to nutrient levels	Gene Ontology	GO:0031667	4	138	0.461266	0.86983	KQ087370:266103-267749|KQ087366:1113367-1114312|KQ087369:690204-691637|KQ087365:2369227-2370352	http://amigo.geneontology.org/cgi-bin/amigo/term_details?term=GO:0031667
organic substance transport	Gene Ontology	GO:0071702	9	333	0.462391	0.86983	KQ087369:587487-589168|KQ087362:1196774-1198078|KQ087375:930620-932510|KQ087373:200757-201957|KQ087365:2369227-2370352|KQ087374:247101-249213|KQ087360:2567613-2574708|KQ087363:3265873-3267451|KQ087358:1380165-1382271	http://amigo.geneontology.org/cgi-bin/amigo/term_details?term=GO:0071702
protein import into nucleus	Gene Ontology	GO:0006606	1	24	0.462725	0.86983	KQ087360:2567613-2574708	http://amigo.geneontology.org/cgi-bin/amigo/term_details?term=GO:0006606
acid-amino acid ligase activity	Gene Ontology	GO:0016881	1	24	0.462725	0.86983	KQ087362:2285060-2286293	http://amigo.geneontology.org/cgi-bin/amigo/term_details?term=GO:0016881
response to host	Gene Ontology	GO:0075136	1	24	0.462725	0.86983	KQ087375:490863-493383	http://amigo.geneontology.org/cgi-bin/amigo/term_details?term=GO:0075136
negative regulation of nuclear division	Gene Ontology	GO:0051784	1	24	0.462725	0.86983	KQ087363:1961113-1963312	http://amigo.geneontology.org/cgi-bin/amigo/term_details?term=GO:0051784
response to defenses of other organism involved in symbiotic interaction	Gene Ontology	GO:0052173	1	24	0.462725	0.86983	KQ087375:490863-493383	http://amigo.geneontology.org/cgi-bin/amigo/term_details?term=GO:0052173
transcription regulatory region DNA binding	Gene Ontology	GO:0044212	1	24	0.462725	0.86983	KQ087366:1113367-1114312	http://amigo.geneontology.org/cgi-bin/amigo/term_details?term=GO:0044212
regulatory region nucleic acid binding	Gene Ontology	GO:0001067	1	24	0.462725	0.86983	KQ087366:1113367-1114312	http://amigo.geneontology.org/cgi-bin/amigo/term_details?term=GO:0001067
regulatory region DNA binding	Gene Ontology	GO:0000975	1	24	0.462725	0.86983	KQ087366:1113367-1114312	http://amigo.geneontology.org/cgi-bin/amigo/term_details?term=GO:0000975
response to extracellular stimulus	Gene Ontology	GO:0009991	4	139	0.466664	0.86983	KQ087370:266103-267749|KQ087366:1113367-1114312|KQ087369:690204-691637|KQ087365:2369227-2370352	http://amigo.geneontology.org/cgi-bin/amigo/term_details?term=GO:0009991
plasma membrane	Gene Ontology	GO:0005886	7	256	0.466919	0.86983	KQ087369:587487-589168|KQ087358:1775025-1776704|KQ087360:1899458-1907109|KQ087375:490863-493383|KQ087367:532772-534988|KQ087365:1642849-1644666|KQ087363:3265873-3267451	http://amigo.geneontology.org/cgi-bin/amigo/term_details?term=GO:0005886
transferase activity, transferring one-carbon groups	Gene Ontology	GO:0016741	3	101	0.471248	0.86983	KQ087375:490863-493383|KQ087363:629074-630563|KQ087362:622829-624191	http://amigo.geneontology.org/cgi-bin/amigo/term_details?term=GO:0016741
ATP binding	Gene Ontology	GO:0005524	10	376	0.475163	0.86983	KQ087361:497876-498573|KQ087369:867503-869432|KQ087373:597107-601040|KQ087363:1004790-1007418|KQ087360:2567613-2574708|KQ087369:646840-650026|KQ087358:1286557-1288080|KQ087362:2481880-2484141|KQ087367:1886428-1889941|KQ087363:1961113-1963312	http://amigo.geneontology.org/cgi-bin/amigo/term_details?term=GO:0005524
protein processing	Gene Ontology	GO:0016485	1	25	0.475929	0.86983	KQ087364:634810-635620	http://amigo.geneontology.org/cgi-bin/amigo/term_details?term=GO:0016485
negative regulation of sporulation	Gene Ontology	GO:0043939	1	25	0.475929	0.86983	KQ087362:862662-866724	http://amigo.geneontology.org/cgi-bin/amigo/term_details?term=GO:0043939
response to external biotic stimulus	Gene Ontology	GO:0043207	1	25	0.475929	0.86983	KQ087375:490863-493383	http://amigo.geneontology.org/cgi-bin/amigo/term_details?term=GO:0043207
regulation of sexual sporulation resulting in formation of a cellular spore	Gene Ontology	GO:0043940	1	25	0.475929	0.86983	KQ087362:862662-866724	http://amigo.geneontology.org/cgi-bin/amigo/term_details?term=GO:0043940
protein targeting to nucleus	Gene Ontology	GO:0044744	1	25	0.475929	0.86983	KQ087360:2567613-2574708	http://amigo.geneontology.org/cgi-bin/amigo/term_details?term=GO:0044744
lipase activity	Gene Ontology	GO:0016298	1	25	0.475929	0.86983	KQ087373:742427-746105	http://amigo.geneontology.org/cgi-bin/amigo/term_details?term=GO:0016298
peroxisomal part	Gene Ontology	GO:0044439	1	25	0.475929	0.86983	KQ087362:1196774-1198078	http://amigo.geneontology.org/cgi-bin/amigo/term_details?term=GO:0044439
oxidoreductase activity, acting on NAD(P)H	Gene Ontology	GO:0016651	1	25	0.475929	0.86983	KQ087358:829077-832215	http://amigo.geneontology.org/cgi-bin/amigo/term_details?term=GO:0016651
aerobic respiration	Gene Ontology	GO:0009060	1	25	0.475929	0.86983	KQ087358:1286557-1288080	http://amigo.geneontology.org/cgi-bin/amigo/term_details?term=GO:0009060
regulation of sexual sporulation	Gene Ontology	GO:0034306	1	25	0.475929	0.86983	KQ087362:862662-866724	http://amigo.geneontology.org/cgi-bin/amigo/term_details?term=GO:0034306
microbody part	Gene Ontology	GO:0044438	1	25	0.475929	0.86983	KQ087362:1196774-1198078	http://amigo.geneontology.org/cgi-bin/amigo/term_details?term=GO:0044438
response to other organism	Gene Ontology	GO:0051707	1	25	0.475929	0.86983	KQ087375:490863-493383	http://amigo.geneontology.org/cgi-bin/amigo/term_details?term=GO:0051707
metallopeptidase activity	Gene Ontology	GO:0008237	1	25	0.475929	0.86983	KQ087363:1013863-1015644	http://amigo.geneontology.org/cgi-bin/amigo/term_details?term=GO:0008237
ligase activity	Gene Ontology	GO:0016874	3	102	0.47756	0.871323	KQ087360:2567613-2574708|KQ087367:1886428-1889941|KQ087362:2285060-2286293	http://amigo.geneontology.org/cgi-bin/amigo/term_details?term=GO:0016874
lytic vacuole	Gene Ontology	GO:0000323	4	142	0.48274	0.871717	KQ087360:2567613-2574708|KQ087365:308012-309649|KQ087373:200757-201957|KQ087371:410140-412175	http://amigo.geneontology.org/cgi-bin/amigo/term_details?term=GO:0000323
storage vacuole	Gene Ontology	GO:0000322	4	142	0.48274	0.871717	KQ087360:2567613-2574708|KQ087365:308012-309649|KQ087373:200757-201957|KQ087371:410140-412175	http://amigo.geneontology.org/cgi-bin/amigo/term_details?term=GO:0000322
fungal-type vacuole	Gene Ontology	GO:0000324	4	142	0.48274	0.871717	KQ087360:2567613-2574708|KQ087365:308012-309649|KQ087373:200757-201957|KQ087371:410140-412175	http://amigo.geneontology.org/cgi-bin/amigo/term_details?term=GO:0000324
cofactor biosynthetic process	Gene Ontology	GO:0051188	3	103	0.483837	0.871717	KQ087365:2372967-2378471|KQ087362:2285060-2286293|KQ087365:2369227-2370352	http://amigo.geneontology.org/cgi-bin/amigo/term_details?term=GO:0051188
nitrogen compound transport	Gene Ontology	GO:0071705	3	103	0.483837	0.871717	KQ087375:930620-932510|KQ087358:1380165-1382271|KQ087365:2369227-2370352	http://amigo.geneontology.org/cgi-bin/amigo/term_details?term=GO:0071705
Golgi apparatus part	Gene Ontology	GO:0044431	2	64	0.483942	0.871717	KQ087362:1491668-1493040|KQ087373:200757-201957	http://amigo.geneontology.org/cgi-bin/amigo/term_details?term=GO:0044431
cell periphery	Gene Ontology	GO:0071944	10	380	0.488325	0.871717	KQ087369:587487-589168|KQ087358:1775025-1776704|KQ087360:1899458-1907109|KQ087374:264300-264824|KQ087375:490863-493383|KQ087367:532772-534988|KQ087368:138458-140429|KQ087365:1642849-1644666|KQ087363:3265873-3267451|KQ087363:1088182-1089795	http://amigo.geneontology.org/cgi-bin/amigo/term_details?term=GO:0071944
single-organism nuclear import	Gene Ontology	GO:1902593	1	26	0.48881	0.871717	KQ087360:2567613-2574708	http://amigo.geneontology.org/cgi-bin/amigo/term_details?term=GO:1902593
nucleus organization	Gene Ontology	GO:0006997	1	26	0.48881	0.871717	KQ087359:909366-911888	http://amigo.geneontology.org/cgi-bin/amigo/term_details?term=GO:0006997
magnesium ion binding	Gene Ontology	GO:0000287	1	26	0.48881	0.871717	KQ087362:2924274-2929987	http://amigo.geneontology.org/cgi-bin/amigo/term_details?term=GO:0000287
purine nucleoside biosynthetic process	Gene Ontology	GO:0042451	1	26	0.48881	0.871717	KQ087362:2285060-2286293	http://amigo.geneontology.org/cgi-bin/amigo/term_details?term=GO:0042451
liposaccharide metabolic process	Gene Ontology	GO:1903509	1	26	0.48881	0.871717	KQ087373:200757-201957	http://amigo.geneontology.org/cgi-bin/amigo/term_details?term=GO:1903509
purine ribonucleoside biosynthetic process	Gene Ontology	GO:0046129	1	26	0.48881	0.871717	KQ087362:2285060-2286293	http://amigo.geneontology.org/cgi-bin/amigo/term_details?term=GO:0046129
carbohydrate derivative binding	Gene Ontology	GO:0097367	13	499	0.489171	0.871717	KQ087363:1007886-1012571|KQ087369:867503-869432|KQ087373:591830-593646|KQ087373:597107-601040|KQ087360:2567613-2574708|KQ087363:1004790-1007418|KQ087369:646840-650026|KQ087361:497876-498573|KQ087358:1286557-1288080|KQ087358:2139490-2144714|KQ087362:2481880-2484141|KQ087367:1886428-1889941|KQ087363:1961113-1963312	http://amigo.geneontology.org/cgi-bin/amigo/term_details?term=GO:0097367
nuclease activity	Gene Ontology	GO:0004518	2	65	0.491875	0.87319	KQ087363:537092-537675|KQ087363:3198271-3200281	http://amigo.geneontology.org/cgi-bin/amigo/term_details?term=GO:0004518
regulation of cellular component biogenesis	Gene Ontology	GO:0044087	2	65	0.491875	0.87319	KQ087367:532772-534988|KQ087363:1961113-1963312	http://amigo.geneontology.org/cgi-bin/amigo/term_details?term=GO:0044087
adenyl ribonucleotide binding	Gene Ontology	GO:0032559	10	382	0.494878	0.87319	KQ087361:497876-498573|KQ087369:867503-869432|KQ087373:597107-601040|KQ087363:1004790-1007418|KQ087360:2567613-2574708|KQ087369:646840-650026|KQ087358:1286557-1288080|KQ087362:2481880-2484141|KQ087367:1886428-1889941|KQ087363:1961113-1963312	http://amigo.geneontology.org/cgi-bin/amigo/term_details?term=GO:0032559
regulation of developmental process	Gene Ontology	GO:0050793	3	105	0.496282	0.87319	KQ087366:1113367-1114312|KQ087375:289977-291200|KQ087362:862662-866724	http://amigo.geneontology.org/cgi-bin/amigo/term_details?term=GO:0050793
single-organism localization	Gene Ontology	GO:1902578	8	304	0.499603	0.87319	KQ087366:601329-603986|KQ087362:1196774-1198078|KQ087375:930620-932510|KQ087365:2369227-2370352|KQ087374:247101-249213|KQ087360:2567613-2574708|KQ087363:3265873-3267451|KQ087358:1380165-1382271	http://amigo.geneontology.org/cgi-bin/amigo/term_details?term=GO:1902578
carbohydrate biosynthetic process	Gene Ontology	GO:0016051	2	66	0.499731	0.87319	KQ087360:1899458-1907109|KQ087367:532772-534988	http://amigo.geneontology.org/cgi-bin/amigo/term_details?term=GO:0016051
ligase activity, forming carbon-oxygen bonds	Gene Ontology	GO:0016875	1	27	0.501376	0.87319	KQ087367:1886428-1889941	http://amigo.geneontology.org/cgi-bin/amigo/term_details?term=GO:0016875
nuclear import	Gene Ontology	GO:0051170	1	27	0.501376	0.87319	KQ087360:2567613-2574708	http://amigo.geneontology.org/cgi-bin/amigo/term_details?term=GO:0051170
cell-substrate adhesion	Gene Ontology	GO:0031589	1	27	0.501376	0.87319	KQ087361:507788-509687	http://amigo.geneontology.org/cgi-bin/amigo/term_details?term=GO:0031589
aminoacyl-tRNA ligase activity	Gene Ontology	GO:0004812	1	27	0.501376	0.87319	KQ087367:1886428-1889941	http://amigo.geneontology.org/cgi-bin/amigo/term_details?term=GO:0004812
ligase activity, forming aminoacyl-tRNA and related compounds	Gene Ontology	GO:0016876	1	27	0.501376	0.87319	KQ087367:1886428-1889941	http://amigo.geneontology.org/cgi-bin/amigo/term_details?term=GO:0016876
nucleobase metabolic process	Gene Ontology	GO:0009112	1	27	0.501376	0.87319	KQ087375:490863-493383	http://amigo.geneontology.org/cgi-bin/amigo/term_details?term=GO:0009112
adenyl nucleotide binding	Gene Ontology	GO:0030554	10	384	0.501412	0.87319	KQ087361:497876-498573|KQ087369:867503-869432|KQ087373:597107-601040|KQ087363:1004790-1007418|KQ087360:2567613-2574708|KQ087369:646840-650026|KQ087358:1286557-1288080|KQ087362:2481880-2484141|KQ087367:1886428-1889941|KQ087363:1961113-1963312	http://amigo.geneontology.org/cgi-bin/amigo/term_details?term=GO:0030554
peptidase activity	Gene Ontology	GO:0008233	3	106	0.502449	0.873575	KQ087368:138458-140429|KQ087364:634810-635620|KQ087363:1013863-1015644	http://amigo.geneontology.org/cgi-bin/amigo/term_details?term=GO:0008233
fungal-type cell wall organization or biogenesis	Gene Ontology	GO:0071852	3	107	0.508577	0.882797	KQ087358:1775025-1776704|KQ087360:1899458-1907109|KQ087367:532772-534988	http://amigo.geneontology.org/cgi-bin/amigo/term_details?term=GO:0071852
dicarboxylic acid metabolic process	Gene Ontology	GO:0043648	1	28	0.513634	0.886185	KQ087360:2667102-2669282	http://amigo.geneontology.org/cgi-bin/amigo/term_details?term=GO:0043648
tRNA aminoacylation for protein translation	Gene Ontology	GO:0006418	1	28	0.513634	0.886185	KQ087367:1886428-1889941	http://amigo.geneontology.org/cgi-bin/amigo/term_details?term=GO:0006418
substrate-specific transporter activity	Gene Ontology	GO:0022892	7	268	0.514071	0.886185	KQ087369:587487-589168|KQ087366:601329-603986|KQ087375:930620-932510|KQ087365:1791220-1792996|KQ087374:247101-249213|KQ087365:1642849-1644666|KQ087358:1380165-1382271	http://amigo.geneontology.org/cgi-bin/amigo/term_details?term=GO:0022892
cofactor metabolic process	Gene Ontology	GO:0051186	4	148	0.514297	0.886185	KQ087370:266103-267749|KQ087365:2372967-2378471|KQ087362:2285060-2286293|KQ087365:2369227-2370352	http://amigo.geneontology.org/cgi-bin/amigo/term_details?term=GO:0051186
protein kinase activity	Gene Ontology	GO:0004672	3	108	0.514666	0.886185	KQ087363:1961113-1963312|KQ087363:1004790-1007418|KQ087373:597107-601040	http://amigo.geneontology.org/cgi-bin/amigo/term_details?term=GO:0004672
hydrolase activity	Gene Ontology	GO:0016787	24	948	0.517396	0.889455	KQ087363:1007886-1012571|KQ087367:1525784-1528662|KQ087376:56623-57856|KQ087363:118552-120324|KQ087364:910390-912706|KQ087369:646840-650026|KQ087365:447988-448935|KQ087374:241916-243284|KQ087364:100407-102613|KQ087373:591830-593646|KQ087373:742427-746105|KQ087363:1013863-1015644|KQ087358:2139490-2144714|KQ087367:356152-357382|KQ087365:449005-449578|KQ087367:372911-374048|KQ087358:1526267-1527664|…	http://amigo.geneontology.org/cgi-bin/amigo/term_details?term=GO:0016787
cytokinesis	Gene Ontology	GO:0000910	2	69	0.522826	0.89209	KQ087360:1899458-1907109|KQ087367:532772-534988	http://amigo.geneontology.org/cgi-bin/amigo/term_details?term=GO:0000910
water-soluble vitamin metabolic process	Gene Ontology	GO:0006767	1	29	0.525592	0.89209	KQ087362:2285060-2286293	http://amigo.geneontology.org/cgi-bin/amigo/term_details?term=GO:0006767
amino acid activation	Gene Ontology	GO:0043038	1	29	0.525592	0.89209	KQ087367:1886428-1889941	http://amigo.geneontology.org/cgi-bin/amigo/term_details?term=GO:0043038
tRNA aminoacylation	Gene Ontology	GO:0043039	1	29	0.525592	0.89209	KQ087367:1886428-1889941	http://amigo.geneontology.org/cgi-bin/amigo/term_details?term=GO:0043039
negative regulation of developmental process	Gene Ontology	GO:0051093	1	29	0.525592	0.89209	KQ087362:862662-866724	http://amigo.geneontology.org/cgi-bin/amigo/term_details?term=GO:0051093
cellular component assembly involved in morphogenesis	Gene Ontology	GO:0010927	1	29	0.525592	0.89209	KQ087374:264300-264824	http://amigo.geneontology.org/cgi-bin/amigo/term_details?term=GO:0010927
protein maturation	Gene Ontology	GO:0051604	1	29	0.525592	0.89209	KQ087364:634810-635620	http://amigo.geneontology.org/cgi-bin/amigo/term_details?term=GO:0051604
vitamin metabolic process	Gene Ontology	GO:0006766	1	29	0.525592	0.89209	KQ087362:2285060-2286293	http://amigo.geneontology.org/cgi-bin/amigo/term_details?term=GO:0006766
active transmembrane transporter activity	Gene Ontology	GO:0022804	3	110	0.526722	0.892594	KQ087366:601329-603986|KQ087365:1642849-1644666|KQ087375:930620-932510	http://amigo.geneontology.org/cgi-bin/amigo/term_details?term=GO:0022804
transferase activity, transferring phosphorus-containing groups	Gene Ontology	GO:0016772	6	232	0.530707	0.897926	KQ087361:497876-498573|KQ087373:597107-601040|KQ087363:1004790-1007418|KQ087362:2481880-2484141|KQ087362:2924274-2929987|KQ087363:1961113-1963312	http://amigo.geneontology.org/cgi-bin/amigo/term_details?term=GO:0016772
whole membrane	Gene Ontology	GO:0098805	5	192	0.5324	0.89844	KQ087362:1196774-1198078|KQ087360:2567613-2574708|KQ087365:308012-309649|KQ087373:200757-201957|KQ087371:410140-412175	http://amigo.geneontology.org/cgi-bin/amigo/term_details?term=GO:0098805
cellular response to starvation	Gene Ontology	GO:0009267	3	111	0.532688	0.89844	KQ087366:1113367-1114312|KQ087369:690204-691637|KQ087365:2369227-2370352	http://amigo.geneontology.org/cgi-bin/amigo/term_details?term=GO:0009267
cell wall macromolecule biosynthetic process	Gene Ontology	GO:0044038	1	30	0.537257	0.900472	KQ087367:532772-534988	http://amigo.geneontology.org/cgi-bin/amigo/term_details?term=GO:0044038
benzene-containing compound metabolic process	Gene Ontology	GO:0042537	1	30	0.537257	0.900472	KQ087365:2372967-2378471	http://amigo.geneontology.org/cgi-bin/amigo/term_details?term=GO:0042537
negative regulation of cellular protein metabolic process	Gene Ontology	GO:0032269	1	30	0.537257	0.900472	KQ087363:537092-537675	http://amigo.geneontology.org/cgi-bin/amigo/term_details?term=GO:0032269
[truncated: 422 more rows]

## Sheet: cys_kegg_down
#Term	Database	ID	Input number	Background number	P-Value	Corrected P-Value	Input	Hyperlink
[truncated: 49 more rows]

## Sheet: met_go_up
#Term	Database	ID	Input number	Background number	P-Value	Corrected P-Value	Input	Hyperlink
[truncated: 1,395 more rows]

[truncated: 3 more sheets: met_kegg_up, met_go_down, met_kegg_down]
